# Supplementary material for: Genome-Wide Expression Profiling of Anoxia/Reoxygenation in Rat Cardiomyocytes Uncovers the Role of MitoKATP in Energy Homeostasis
Source: Oxid Med Cell Longev. 2015 Jun 15;2015:756576. doi: 10.1155/2015/756576 (PMC4485557; doi:10.1155/2015/756576)
Supplement: Supplementary file 1 — Excel 1: Raw data of the expression of all the gene (4 groups × 3 replicates of the sequencing) . Excel 2: Significant differently expressed genes from Control versus A/R. Excel 3: Significant differently expressed genes from A/R versus DZ. Excel 4: Significant differently expressed genes from DZ versus DZ5HD. Supplementary Figure 1: Assessment of the DGE saturation degree. Supplementary Table 1: The raw data of DGE profile of 12 sequencings. Supplementary Table 2: DEGs significantly enriched GO terms from Control vs A/R (P<0.05). Supplementary Table 3: DEGs significantly enriched GO terms from A/R vs DZ (P<0.05). Supplementary Table 4: DEGs significantly enriched GO terms from DZ vs DZ5HD (P<0.05). Supplementary Table 5: Significantly enriched pathways for DEGs from Con vs A/R (P<0.01). Supplementary Table 6: Significantly enriched pathways for DEGs from A/R vs DZ (P<0.01). Supplementary Table 7: Significantly enriched pathways for DEGs from DZ vs DZ5HD (P<0.01). [file 756576.f1.zip]

Archive with 9 entries (9 files):
- Excel1í¬í¬gene expression.xlsx
- Excel1——gene expression.xlsx
- Excel2í¬í¬significant DEGs (Control-VS-Aú»R).xlsx
- Excel2——significant DEGs (Control-VS-A/R).xlsx
- Excel3í¬í¬significant DEGs (ú_ú»R-VS-DZ).xlsx
- Excel3——significant DEGs (A/R-VS-DZ).xlsx
- Excel4í¬í¬significant DEGs (DZ-VS-DZ5HD).xlsx
- Excel4——significant DEGs (DZ-VS-DZ5HD).xlsx
- Supplementary Figure and Tables 2014.12.7.docx
