# Supplementary material for: Genome-Wide Expression Profiling of Anoxia/Reoxygenation in Rat Cardiomyocytes Uncovers the Role of MitoKATP in Energy Homeostasis
Source: Oxid Med Cell Longev. 2015 Jun 15;2015:756576. doi: 10.1155/2015/756576 (PMC4485557; doi:10.1155/2015/756576)
Supplement: Supplementary file 1 — Excel 1: Raw data of the expression of all the gene (4 groups × 3 replicates of the sequencing) . Excel 2: Significant differently expressed genes from Control versus A/R. Excel 3: Significant differently expressed genes from A/R versus DZ. Excel 4: Significant differently expressed genes from DZ versus DZ5HD. Supplementary Figure 1: Assessment of the DGE saturation degree. Supplementary Table 1: The raw data of DGE profile of 12 sequencings. Supplementary Table 2: DEGs significantly enriched GO terms from Control vs A/R (P<0.05). Supplementary Table 3: DEGs significantly enriched GO terms from A/R vs DZ (P<0.05). Supplementary Table 4: DEGs significantly enriched GO terms from DZ vs DZ5HD (P<0.05). Supplementary Table 5: Significantly enriched pathways for DEGs from Con vs A/R (P<0.01). Supplementary Table 6: Significantly enriched pathways for DEGs from A/R vs DZ (P<0.01). Supplementary Table 7: Significantly enriched pathways for DEGs from DZ vs DZ5HD (P<0.01). [file 756576.f1.zip › Excel1í¬í¬gene expression.xlsx]

## Sheet: Excel1——gene expression
GeneID	GeneName	Length	Control-1_Uniq_reads_num(3573755)	Control-1_Coverage	Control-1_RPKM	Control-2_Uniq_reads_num(3911901)	Control-2_Coverage	Control-2_RPKM	Control-3_Uniq_reads_num(3678015)	Control-3_Coverage	Control-3_RPKM	DZ-1_Uniq_reads_num(4062579)	DZ-1_Coverage	DZ-1_RPKM	DZ-2_Uniq_reads_num(3581277)	DZ-2_Coverage	DZ-2_RPKM	DZ-3_Uniq_reads_num(3958007)	DZ-3_Coverage	DZ-3_RPKM	DZ5HD-1_Uniq_reads_num(4017425)	DZ5HD-1_Coverage	DZ5HD-1_RPKM	DZ5HD-2_Uniq_reads_num(3874447)	DZ5HD-2_Coverage	DZ5HD-2_RPKM	DZ5HD-3_Uniq_reads_num(3831925)	DZ5HD-3_Coverage	DZ5HD-3_RPKM	A/R-1_Uniq_reads_num(3765226)	A/R-1_Coverage	A/R-1_RPKM	A/R-2_Uniq_reads_num(3560826)	A/R-2_Coverage	A/R-2_RPKM	A/R-3_Uniq_reads_num(3485973)	A/R-3_Coverage	A/R-3_RPKM
ENSRNOG00000034234	COI	1545	616314	0.9994	111622	638266	0.9994	105605	810289	0.9994	142593	635622	0.9994	101267	614982	0.9994	111147	860953	0.9994	140791	674253	0.9994	108629	664672	0.9994	111037	801091	0.9994	135312	640881	0.9994	110169	553449	0.9994	100600	761270	0.9994	141347
ENSRNOG00000031033	MT-ND2	1039	349088	0.999	94014.4	249909	0.999	61486.3	178478	0.999	46704.2	289400	0.999	68561.6	253039	0.999	68003.9	183435	0.999	44605.7	327498	0.999	78459.5	275336	0.999	68397.1	204826	0.999	51446.1	289845	0.999	74089.9	218018	0.999	58928.6	173306	0.999	47849.1
ENSRNOG00000029707	MT-ND4	1378	343688	0.9993	69789.5	236664	0.9993	43903.1	185722	0.9993	36643.8	249026	0.9993	44483	233511	0.9993	47317.3	189885	0.9993	34814.9	269247	0.9993	48635.6	249609	0.9993	46752.1	206028	0.9993	39017.6	247121	0.9993	47628.8	210907	0.9993	42982.4	181421	0.9993	37767.2
ENSRNOG00000031979	MT-ATP6	681	245113	0.9985	100715	220147	0.9985	82637.6	203709	0.9985	81329.8	253517	0.9985	91634.3	214886	0.9985	88109.6	217583	0.9985	80723.7	279197	0.9985	102051	229481	0.9985	86974.1	218425	0.9985	83702.5	258794	0.9985	100929	204156	0.9985	84190.7	194590	0.9985	81969
ENSRNOG00000031766	CYTB	1143	237745	0.9974	58202.3	186080	0.9983	41616.5	183142	0.9965	43564	186521	0.9956	40168	171058	0.9965	41788.7	200202	0.9983	44253.3	197133	0.9974	42930.4	187595	0.9974	42360.9	188212	0.9983	42971.9	187450	0.9983	43556	153238	0.9965	37650.4	181761	0.9974	45617.4
ENSRNOG00000030700	MT-CO3	784	230005	0.9987	82091.2	291749	0.9987	95127.4	309282	0.9987	107257	309405	0.9987	97142.5	271571	0.9987	96722.9	334356	0.9987	107750	329504	0.9987	104616	294069	0.9987	96810.7	299839	0.9987	99805.6	314313	0.9987	106477	254877	0.9987	91298.5	296812	0.9987	108603
ENSRNOG00000030644	ND1	955	187046	0.999	54805	120022	0.999	32127	103466	0.999	29456.5	135321	0.999	34878.7	115674	0.999	33821.6	111575	0.999	29518	146773	0.999	38255.6	124533	0.999	33656.7	112150	0.999	30646.4	136051	0.999	37836.2	108754	0.999	31980.9	100952	0.999	30324.1
ENSRNOG00000029971	MT-ND5	1830	148066	0.9962	22640.2	117349	0.9989	16392.3	93268	0.9945	13857	132775	0.9962	17859.3	125364	0.9929	19128.6	101900	0.9995	14068.5	142624	0.9934	19399.6	136808	0.9995	19295.3	111442	0.9989	15892.1	132231	0.9978	19190.7	109473	0.9984	16799.8	100246	0.9945	15714.2
ENSRNOG00000030371	MT-CO2	684	105942	0.9985	43339.8	118668	0.9956	44349.6	130289	0.9971	51789.1	117503	0.9942	42285.5	123255	0.9942	50316.5	137451	0.9956	50770.9	122854	0.9942	44708	132378	0.9985	49951.7	125604	0.9971	47921.5	120689	0.9956	46862	117425	0.9971	48211.8	124779	0.9927	52331.3
ENSRNOG00000033299	MT-ATP8	204	79171	0.9902	108595	43844	0.9902	54940.4	40332	0.9902	53753.4	53936	0.9902	65079.9	46181	0.9951	63211.4	44009	0.9902	54504.8	59313	0.9902	72372.2	47664	0.9902	60304.6	41728	0.9902	53380.2	53031	0.9902	69041.2	40316	0.9902	55500.5	39092	0.9951	54971
ENSRNOG00000029042	MT-ND6	519	65489	0.9981	35308.3	39099	0.9981	19258	32638	0.9981	17097.9	38116	0.9981	18077.5	39337	0.9981	21163.9	32710	0.9981	15923.4	2405	0.9981	1153.45	2405	0.9961	1196.02	2405	0.9981	1209.29	1452	0.9942	743.033	1452	0.9961	785.685	1452	0.9981	802.556
ENSRNOG00000033615	ND3	348	25038	0.9856	20132.4	30494	0.9684	22400	36822	0.9943	28768.3	28941	0.977	20470.7	28692	0.9799	23022	40273	0.9943	29238.7	31250	0.9799	22352.3	30694	0.9856	22764.8	36159	0.9799	27115.7	27951	0.9799	21331.8	30558	0.9684	24660.1	35477	0.9713	29244.5
ENSRNOG00000031053	MT-ND4L	297	18628	0.9966	17550.3	31290	0.9966	26931.5	22782	0.9966	20855.6	35308	0.9966	29262.7	32162	0.9966	30237.7	24796	0.9966	21093.5	36904	0.9966	30929.2	36296	0.9966	31542.2	24193	0.9966	21257.7	34077	0.9966	30472.9	27019	0.9966	25548.3	24067	0.9933	23245.6
ENSRNOG00000033734	Tnnt2	1096	16597	0.9608	4237.35	23865	0.9599	5566.25	21446	0.9617	5320.13	21073	0.9617	4732.75	20088	0.9617	5117.86	24881	0.9617	5735.62	20056	0.9608	4554.97	21930	0.9617	5164.38	25180	0.9608	5995.54	18656	0.9599	4520.82	25571	0.958	6552.19	19995	0.9526	5233.44
ENSRNOG00000004583	Mb	977	13710	0.998	3926.61	26057	0.9918	6817.76	26405	0.9939	7348.15	24427	0.9918	6154.23	20720	0.9887	5921.85	27497	0.9949	7110.73	22487	0.9918	5729.14	23167	0.9959	6120.2	26567	0.9939	7096.28	21867	0.9877	5944.34	26621	0.9877	7652.07	23905	0.9887	7018.92
ENSRNOG00000018598	Ankrd1	1745	12807	0.9989	2053.65	23836	0.9994	3491.81	19771	0.9994	3080.49	1453	0.9948	204.96	1453	0.9966	232.505	1453	0.9943	210.375	18638	0.9989	2658.62	20130	0.9983	2977.41	20290	0.9994	3034.38	18894	0.9989	2875.66	23942	0.9966	3853.14	18611	0.996	3059.5
ENSRNOG00000025757	Myh6	5925	10744	0.7693	507.403	15555	0.7711	671.11	11360	0.7695	521.287	22172	0.7718	921.117	16296	0.7718	767.989	14099	0.7713	601.206	19783	0.7708	831.105	18106	0.7716	788.723	15272	0.7703	672.652	18471	0.7715	827.963	19912	0.7715	943.791	12968	0.7715	627.857
ENSRNOG00000008536	Actc1	1489	8698	0.9926	1634.56	15758	0.9966	2705.32	14086	0.9919	2572.05	15829	0.9839	2616.72	12504	0.9389	2344.86	15622	0.9839	2650.73	14193	0.9899	2372.64	13783	0.9926	2389.13	15199	0.9913	2663.81	13362	0.9577	2383.34	14593	0.9953	2752.32	13151	0.9852	2533.61
ENSRNOG00000002840	Atp5b	1759	8059	0.9943	1282.01	14732	0.9983	2140.96	13734	0.9972	2122.84	16006	0.9943	2239.83	12073	0.9943	1916.51	15276	0.9943	2194.15	14056	0.9949	1989.06	14250	0.9943	2090.93	14718	0.9972	2183.56	13564	0.9983	2048	15063	0.9972	2404.89	13598	0.9943	2217.61
ENSRNOG00000029079	Hspb7	1767	7482	0.9994	1184.83	8710	0.9989	1260.07	6867	0.9977	1056.62	9516	0.9972	1325.61	7259	0.9926	1147.1	7956	0.9989	1137.58	8182	0.9989	1152.59	8672	0.9994	1266.7	8209	0.9989	1212.37	7317	0.9989	1099.78	8242	0.9983	1309.92	6943	0.9983	1127.16
ENSRNOG00000010524	Cryab	1248	7370	0.6755	1652.45	14958	0.7155	3063.88	10917	0.7244	2378.35	11822	0.6995	2331.71	11550	0.6418	2584.22	11641	0.6506	2356.67	11860	0.7075	2365.5	12962	0.7228	2680.7	11033	0.653	2307.08	10808	0.7444	2300.06	13088	0.7107	2945.15	10333	0.6787	2375.13
ENSRNOG00000016983	Myh7	5923	6994	0.7684	330.415	18767	0.7719	809.963	15944	0.7719	731.884	14048	0.7722	583.809	17095	0.7722	805.915	21665	0.7726	924.146	11470	0.7704	482.03	19898	0.7726	867.078	24028	0.7724	1058.67	7616	0.7707	341.503	13760	0.7707	652.418	11001	0.7706	532.803
ENSRNOG00000018184	TPM1	1664	6699	0.4507	1126.5	13633	0.6034	2094.35	13336	0.5625	2179.01	12619	0.6154	1866.68	11410	0.5631	1914.67	15198	0.7019	2307.58	11547	0.5799	1727.3	12789	0.5228	1983.69	15193	0.5084	2382.72	10769	0.5228	1718.82	14324	0.4549	2417.47	11841	0.5763	2041.32
ENSRNOG00000019810	Des	2163	6583	0.9982	851.614	12477	0.9982	1474.57	10815	0.9986	1359.43	12270	0.9991	1396.32	10207	0.9991	1317.66	11740	0.9986	1371.31	10979	0.9982	1263.45	11279	0.9986	1345.87	12167	0.9986	1467.95	10576	0.9986	1298.6	12853	0.9986	1668.77	10202	0.9986	1353.02
ENSRNOG00000020922	Hspb6	1341	6043	0.9911	1260.95	6167	0.9888	1175.59	5201	0.9903	1054.5	6284	0.9911	1153.47	5136	0.9888	1069.44	6044	0.9925	1138.73	5698	0.994	1057.66	5919	0.9903	1139.23	6184	0.9888	1203.44	5167	0.9896	1023.34	5605	0.9896	1173.81	5274	0.9911	1128.2
ENSRNOG00000018250	Tnni3	698	5904	0.9857	2366.83	12730	0.9971	4662.14	17026	0.9986	6631.99	11670	0.9971	4115.41	10600	0.9986	4240.46	19150	0.9986	6931.65	10888	0.9986	3882.8	11703	0.9986	4327.45	18632	0.9986	6966.06	10599	0.9971	4032.91	13972	0.9986	5621.5	15454	0.9971	6351.28
ENSRNOG00000016460	Clu	1685	5740	0.9674	953.207	7773	0.968	1179.24	5544	0.968	894.561	476	0.9596	69.5353	476	0.9674	78.8804	476	0.9478	71.3724	7298	0.968	1078.09	7136	0.9674	1093.06	6333	0.968	980.827	6573	0.968	1036.03	7603	0.9733	1267.17	5294	0.9685	901.281
ENSRNOG00000020955	Myl3	935	5615	0.9957	1680.4	13005	0.9904	3555.58	15172	0.9914	4411.82	11992	0.9882	3157.03	10757	0.9904	3212.49	16532	0.9893	4467.22	11465	0.9893	3052.21	12363	0.9893	3412.73	15884	0.9882	4433.34	10641	0.9904	3022.59	14341	0.985	4307.42	14160	0.9925	4344.38
ENSRNOG00000034258	Xirp2	12044	5552	0.9963	128.989	7193	0.9995	152.669	3831	0.9971	86.4824	8049	0.9994	164.501	7502	0.9996	173.928	4828	0.9984	101.279	7911	0.9997	163.498	8423	0.9995	180.504	4867	0.9971	105.457	7619	0.9997	168.01	8172	0.9998	190.549	4282	0.9997	101.989
ENSRNOG00000019851	COX6A2	475	5284	0.9705	3112.75	6125	0.9789	3296.28	6860	0.9832	3926.6	5367	0.9832	2781.23	4939	0.9642	2903.4	6554	0.9895	3486.07	5038	0.9874	2640.08	5321	0.9895	2891.28	6885	0.9663	3782.63	4917	0.9811	2749.26	5860	0.9453	3464.6	5859	0.9874	3538.39
ENSRNOG00000001285	ATP2A2	5323	5240	0.8127	275.455	12015	0.8843	577.005	9102	0.8584	464.908	13715	0.8777	634.216	11179	0.9111	586.42	11146	0.8439	529.037	12357	0.9036	577.842	12383	0.8739	600.426	10981	0.8961	538.355	11741	0.9342	585.811	13350	0.8764	704.327	10007	0.917	539.291
ENSRNOG00000007281	Flnc	9049	4822	0.9927	149.108	6605	0.9958	186.588	4106	0.9882	123.369	7857	0.9944	213.725	6044	0.9959	186.503	4693	0.9941	131.031	6783	0.9969	186.584	6880	0.9958	196.236	5179	0.9871	149.358	6364	0.9924	186.784	6876	0.9973	213.395	4680	0.9931	148.362
ENSRNOG00000024128	Aco2	3229	4425	0.9919	383.46	6305	0.9966	499.148	5330	0.9981	448.793	6863	0.9991	523.172	5362	0.996	463.683	5709	0.9978	446.699	5744	0.9969	442.791	5910	0.9892	472.4	6241	0.9978	504.393	5413	0.9978	445.224	6272	0.9926	545.491	5302	0.9978	471.029
ENSRNOG00000017833	Actn2	2943	4170	0.999	396.48	5630	0.9997	489.024	5017	0.9997	463.49	6685	0.9997	559.126	5134	0.9997	487.111	5505	0.9997	472.597	5935	0.9997	501.976	5707	0.9997	500.504	6137	0.9997	544.188	5320	0.9997	480.098	6058	0.9997	578.08	5317	0.9997	518.266
ENSRNOG00000023647	Aldoa	1441	4075	0.9938	791.296	7791	0.9889	1382.11	7106	0.9924	1340.75	7857	0.9965	1342.12	6250	0.991	1211.09	7692	0.9924	1348.65	672	0.9868	116.08	690	0.9868	123.588	696	0.9827	126.046	6549	0.9931	1207.04	7949	0.9931	1549.17	6624	0.9938	1318.66
ENSRNOG00000016837	Ckm	1414	3674	0.9441	727.051	4815	0.9448	870.48	5141	0.9463	988.518	5316	0.9455	925.409	4039	0.9498	797.603	5524	0.9434	987.024	704	0.9392	123.93	719	0.9286	131.241	878	0.9406	162.042	4179	0.9455	784.932	5230	0.9491	1038.73	4756	0.9455	964.869
ENSRNOG00000010830	Slc25a4	1313	3463	0.9802	738.011	8082	0.9711	1573.5	7859	0.9718	1627.38	6874	0.9726	1288.67	6453	0.9703	1372.33	8735	0.9726	1680.82	6435	0.9688	1219.93	7045	0.968	1384.86	8708	0.9711	1730.76	5823	0.9878	1177.85	7854	0.9726	1679.87	7261	0.9733	1586.38
ENSRNOG00000013000	Ldhb	1284	3333	0.9984	726.349	8633	0.9969	1718.73	7396	0.9969	1566.1	7711	0.9953	1478.24	6943	0.9953	1509.89	8230	0.9969	1619.42	532	0.9844	103.133	532	0.9899	106.939	532	0.9805	108.126	6630	0.9969	1371.38	8515	0.9969	1862.38	7001	0.9953	1564.12
ENSRNOG00000014117	Hmox1	1542	3300	0.9831	598.832	5675	0.9968	940.792	4935	0.9968	870.14	6338	0.9968	1011.73	4507	0.9981	816.141	4869	0.9968	797.772	450	0.9929	72.6408	450	0.9955	75.3214	450	0.9896	76.1572	5004	0.9968	861.87	5652	0.9968	1029.36	4691	0.9987	872.684
ENSRNOG00000003147	SQSTM1	1991	3172	0.9905	445.797	5724	0.9925	734.921	4438	0.9905	606.042	7063	0.994	873.205	4737	0.995	664.346	4983	0.9935	632.329	6043	0.9935	755.498	5214	0.9915	675.912	5330	0.991	698.617	5555	0.993	741.006	6100	0.992	860.415	4784	0.994	689.28
ENSRNOG00000000875	Fhl1	2269	2888	0.9987	356.154	4570	0.9982	514.866	3117	0.9996	373.498	4503	0.9996	488.501	3768	0.9996	463.701	3835	0.9996	427.026	4291	0.9996	470.735	4274	0.9982	486.172	3893	0.9996	447.747	3920	0.9996	458.839	4354	0.9996	538.894	3301	0.9982	417.337
ENSRNOG00000016714	Nrap	5483	2883	0.9774	147.13	3679	0.9776	171.524	2269	0.9728	112.513	4879	0.9781	219.034	3522	0.9856	179.363	2897	0.9768	133.492	4307	0.9781	195.528	3876	0.9772	182.455	3344	0.9757	159.159	3819	0.9776	184.987	4162	0.9768	213.173	2724	0.9759	142.516
ENSRNOG00000017032	Atp5a1	1735	2877	0.9689	463.997	7794	0.9695	1148.35	6839	0.9689	1071.72	7982	0.97	1132.43	6511	0.97	1047.88	7858	0.9689	1144.29	6741	0.9695	967.113	7251	0.9689	1078.67	8339	0.97	1254.29	6620	0.9689	1013.37	8082	0.9683	1308.18	6756	0.9689	1117.03
ENSRNOG00000012307	Mybpc3	4165	2840	0.9993	190.8	5240	0.9995	321.609	4322	0.9998	282.135	6007	0.9995	355.01	4974	0.9995	333.467	5373	0.9995	325.931	5106	0.9993	305.153	5495	0.9998	340.52	5618	0.9993	352.006	4998	0.9995	318.706	6033	0.9993	406.787	4775	0.9993	328.878
ENSRNOG00000012193	Cited2	1960	2643	0.9786	377.326	2340	0.9827	305.191	1616	0.975	224.167	2629	0.9811	330.166	1943	0.974	276.808	1761	0.9806	227	2529	0.9689	321.177	2159	0.9714	284.307	1745	0.9791	232.339	2309	0.9776	312.879	2454	0.9832	351.615	1724	0.9755	252.323
ENSRNOG00000013949	Idh2	1668	2641	0.9934	443.045	6045	0.9988	926.43	4830	0.9958	787.295	5838	0.9982	861.522	4833	0.9994	809.064	5139	0.997	778.406	394	0.9796	58.7966	394	0.9904	60.9664	394	0.9826	61.6429	151	0.9436	24.0431	151	0.9718	25.4232	151	0.9556	25.9691
ENSRNOG00000011754	Myom2	4513	2567	0.9927	159.161	4327	0.9987	245.095	3520	0.9916	212.062	5353	0.998	291.965	4908	0.9967	303.67	4996	0.9973	279.692	4482	0.9971	247.206	5328	0.9998	304.712	5097	0.9996	294.735	4266	0.9953	251.052	5802	0.9947	361.045	4541	0.998	288.644
ENSRNOG00000023546	Hspb1	806	2554	0.9988	886.668	5070	0.9975	1608	3802	0.9938	1282.52	4058	0.9975	1239.3	3722	0.9938	1289.45	4047	0.9913	1268.59	4579	0.9975	1414.13	3909	0.9938	1251.76	4044	0.9901	1309.36	3799	0.9975	1251.82	4950	0.9938	1724.72	3605	0.9938	1283.06
ENSRNOG00000022619	Fth1	896	2371	0.7243	740.455	3599	0.7221	1026.8	3860	0.7277	1171.29	3457	0.7254	949.707	2859	0.7143	890.981	4209	0.7232	1186.85	3246	0.7188	901.764	3166	0.7165	911.997	4281	0.731	1246.87	1694	0.7132	502.128	2092	0.721	655.697	2021	0.7254	647.045
ENSRNOG00000028356	Chchd10	660	2325	0.997	985.722	2503	0.9955	969.458	2609	0.997	1074.77	2458	0.9955	916.719	2049	0.997	866.882	2873	0.997	1099.8	2220	0.9955	837.262	2296	0.997	897.88	2719	0.9985	1075.1	2011	0.997	809.24	2658	0.9939	1130.99	2437	0.997	1059.22
ENSRNOG00000019834	Hsp90ab1	2483	2280	0.9795	256.941	4504	0.9895	463.696	3343	0.9883	366.055	4121	0.9883	408.53	3635	0.9891	408.78	3895	0.9887	396.327	3785	0.9903	379.438	3987	0.9887	414.438	3919	0.9895	411.89	3751	0.9883	401.217	4886	0.9887	552.619	3475	0.9899	401.471
ENSRNOG00000030848	Myl2	250	2242	0.848	2509.41	5325	0.876	5444.92	5518	0.876	6001.06	4789	0.876	4715.23	4364	0.864	4874.24	6112	0.876	6176.85	4247	0.848	4228.58	4940	0.876	5100.08	5622	0.88	5868.59	3734	0.876	3966.83	4267	0.868	4793.27	5188	0.88	5953
ENSRNOG00000001440	Mdh2	1291	2154	0.9915	466.869	3099	0.9946	613.631	2748	0.9884	578.731	3200	0.9899	610.129	2451	0.9899	530.126	2935	0.9985	574.388	2778	0.9907	535.622	2841	0.983	567.983	2969	0.9907	600.16	100	0.8513	20.5723	100	0.8776	21.7532	100	0.849	22.2203
ENSRNOG00000002632	Naca	6717	2149	0.9859	89.5233	1471	0.9899	55.9821	1202	0.9677	48.6537	2028	0.9969	74.3174	1539	0.9806	63.9772	1540	0.9841	57.9254	1645	0.9903	60.9597	1659	0.9969	63.7472	1738	0.9949	67.5239	1526	0.9924	60.3376	1698	0.9963	70.9924	1325	0.9847	56.587
ENSRNOG00000014327	Csrp3	837	2142	0.9988	716.093	5638	0.9964	1721.92	4660	0.994	1513.72	4762	0.994	1400.43	4445	0.9964	1482.89	5360	0.9952	1617.94	4473	0.994	1330.23	5082	0.9952	1567.11	5202	0.9964	1621.91	4212	0.9952	1336.51	5767	0.9928	1934.97	4588	0.9964	1572.44
ENSRNOG00000005130	Ogdh	4089	2090	0.9932	143.023	2881	0.9995	180.11	1973	0.9905	131.189	455	0.967	27.39	455	0.9729	31.0711	455	0.9865	28.1137	2642	0.9956	160.83	2987	0.9976	188.542	2626	0.9971	167.595	2504	0.9995	162.64	3222	0.9971	221.288	2354	0.9968	165.145
ENSRNOG00000007219	Hsp90aa1	2780	2085	0.9849	209.863	5363	0.9863	493.146	3921	0.9871	383.476	3353	0.9871	296.884	3904	0.9871	392.127	4083	0.9871	371.072	3854	0.9871	345.079	4099	0.9871	380.56	3509	0.9871	329.398	3821	0.9871	365.041	4831	0.991	488.024	3855	0.9871	397.792
ENSRNOG00000018220	Pde4dip	6972	2069	0.993	83.0383	2757	0.9911	101.086	2013	0.9924	78.5006	3811	0.9931	134.549	2873	0.9918	115.064	2468	0.996	89.4358	2847	0.9938	101.644	3213	0.9938	118.944	2868	0.9915	107.351	2889	0.9989	110.052	3480	0.9967	140.175	2381	0.9921	97.9666
ENSRNOG00000017123	B2m	1827	2001	0.9781	306.467	2593	0.9995	362.807	3179	0.9951	473.084	2062	0.9967	277.81	2144	0.9967	327.679	3466	0.9852	479.307	2036	0.9934	277.39	2317	0.9951	327.324	2880	0.9945	411.374	1900	0.9962	276.2	2496	0.9945	383.668	2892	0.9951	454.084
ENSRNOG00000021090	Pygm	2840	1845	0.9968	181.783	2370	0.9989	213.325	2133	0.9975	204.202	2660	0.9968	230.548	2153	0.9968	211.684	2303	0.9968	204.88	2366	0.9968	207.371	2482	0.9968	225.566	2600	0.9993	238.912	148	0.8817	13.8405	149	0.8095	14.7339	151	0.9081	15.2523
ENSRNOG00000020266	Eef2	2917	1808	0.9993	173.435	3369	0.9993	295.241	3228	0.9993	300.873	3940	0.9993	332.474	2869	0.999	274.635	3888	0.999	336.754	3380	0.9986	288.425	3439	0.9997	304.289	4297	0.999	384.425	3073	0.9979	279.792	3443	0.9993	331.474	3326	0.9993	327.086
ENSRNOG00000020298	Bag3	2327	1789	0.9936	215.124	2299	0.9953	252.554	1553	0.9944	181.452	2711	0.9953	286.768	1892	0.9948	227.032	1796	0.9936	194.999	2295	0.9893	245.493	2144	0.9905	237.804	1842	0.994	206.574	173	0.9265	19.7451	173	0.9364	20.8785	173	0.9544	21.3268
ENSRNOG00000010389	Ndrg2	2032	1749	0.9897	240.847	2662	0.9931	334.886	2095	0.9936	280.315	2857	0.9877	346.087	2330	0.9941	320.18	2383	0.9897	296.295	2393	0.9892	293.137	2615	0.9961	332.153	2448	0.9931	314.391	2201	0.9887	287.677	2888	0.9838	399.138	2131	0.9975	300.84
ENSRNOG00000026842	Nnt	4122	1737	0.9617	117.914	3387	0.9947	210.048	2010	0.9949	132.579	3881	0.9951	231.758	3065	0.9961	207.627	2460	0.9944	150.782	3052	0.9879	184.301	3401	0.9947	212.956	2672	0.9893	169.165	2889	0.9985	186.144	3328	0.9959	226.738	2419	0.9949	168.346
ENSRNOG00000018943	Tnnc1	663	1734	0.9955	731.831	4553	0.9985	1755.48	5113	0.997	2096.76	3815	0.9985	1416.38	3436	0.9985	1447.11	5735	0.9985	2185.46	3465	0.9955	1300.89	3960	0.997	1541.6	5366	0.9985	2112.13	3294	0.997	1319.53	4819	0.9955	2041.23	4664	0.997	2018
ENSRNOG00000000413	Pln	496	1720	0.9919	970.336	2616	0.998	1348.24	2587	0.998	1418.08	2638	0.998	1309.16	1980	0.998	1114.67	2705	0.998	1377.87	2170	0.998	1089.01	2261	0.998	1176.55	2565	0.998	1349.55	2063	0.998	1104.65	2437	0.998	1379.82	2326	0.998	1345.25
ENSRNOG00000012181	Lpl	3608	1685	0.9895	130.68	4098	0.9972	290.347	3076	0.9964	231.796	4364	0.9978	297.726	3747	0.9972	289.987	3912	0.9989	273.94	3648	0.9978	251.675	4433	0.9986	317.118	3460	0.9972	250.261	268	0.8645	19.7277	268	0.9302	20.8602	268	0.9047	21.3081
ENSRNOG00000018044	Phyh	1190	1655	0.9958	389.158	3282	0.9983	705.024	2335	0.9983	533.49	2967	0.9975	613.718	2786	0.9992	653.727	2537	0.9983	538.638	2723	0.9975	569.578	3052	0.9983	661.954	2557	0.9983	560.747	2637	0.9983	588.535	3220	0.9983	759.903	2308	0.9983	556.371
ENSRNOG00000047746	-	1140	1647	0.3895	404.263	4776	0.3939	1070.96	9721	0.3939	2318.42	3461	0.3939	747.3	2586	0.3939	633.411	3150	0.3912	698.118	2229	0.3912	486.696	2918	0.393	660.649	3650	0.3912	835.547	2067	0.3939	481.554	2007	0.3939	494.415	1950	0.3895	490.688
ENSRNOG00000045613	Ckmt2	1239	1636	0.7232	369.477	3190	0.7328	658.16	3239	0.728	710.765	3279	0.7667	651.431	2803	0.7248	631.704	3643	0.7256	742.867	288	0.699	57.8593	288	0.7143	59.9945	288	0.6893	60.6602	2707	0.7256	580.264	3459	0.7272	784.022	3233	0.7215	748.532
ENSRNOG00000014815	Myoz2	951	1616	0.9474	475.484	1721	0.9821	462.607	1828	0.9958	522.615	2180	0.9895	564.253	1446	0.9905	424.571	2014	0.9863	535.06	1871	0.9958	489.717	1702	0.9947	461.923	2003	0.9874	549.646	1787	0.9811	499.06	1606	0.98	474.258	1716	0.9748	517.622
ENSRNOG00000033280	Pam	3774	1571	0.9791	116.48	2878	0.9997	194.94	1991	0.9987	143.435	3319	0.9968	216.473	2739	0.9928	202.653	2480	0.9979	166.025	2781	0.9921	183.422	3014	0.9936	206.125	2560	0.9984	177.019	2620	0.9984	184.378	3005	0.9989	223.61	2304	0.996	175.128
ENSRNOG00000043094	Oxct1	3304	1528	0.9942	129.407	4341	0.9958	335.863	2537	0.9955	208.769	4444	0.9958	331.079	3885	0.9967	328.332	3273	0.9961	250.282	562	0.9755	42.3398	562	0.9616	43.9022	562	0.9858	44.3894	119	0.7803	9.56568	119	0.8202	10.1148	119	0.7878	10.332
ENSRNOG00000017786	Acta1	1453	1525	0.989	293.683	2223	0.989	391.098	3059	0.9883	572.401	2553	0.9883	432.497	1657	0.9876	318.434	3522	0.9883	612.417	2585	0.9883	442.84	1988	0.9876	353.135	3680	0.9876	660.945	2270	0.9911	414.925	2055	0.9883	397.187	2682	0.9876	529.504
ENSRNOG00000012477	Eef1a2	2011	1497	0.997	208.298	1615	0.9975	205.292	1621	0.9871	219.158	2141	0.9896	262.061	1407	0.9692	195.364	1823	0.9761	229.033	1846	0.9791	228.492	1684	0.9846	216.133	2119	0.9766	274.98	1597	0.9935	210.912	1804	0.994	251.926	1763	0.9731	251.487
ENSRNOG00000012879	Fabp3	685	1480	0.9212	604.57	3335	0.9328	1244.56	3400	0.9139	1349.51	2835	0.9109	1018.73	2585	0.9124	1053.74	3734	0.9168	1377.23	2676	0.9109	972.406	2867	0.9226	1080.26	3672	0.9197	1398.93	2352	0.9066	911.918	3109	0.9182	1274.62	3033	0.9168	1270.16
ENSRNOG00000011782	Got2	2357	1473	0.9754	174.871	2661	0.9784	288.601	2274	0.9724	262.312	542	0.9571	56.6028	479	0.9656	56.7464	474	0.9563	50.8092	2437	0.9771	257.364	2485	0.9699	272.118	2675	0.969	296.174	2232	0.9703	251.503	2564	0.9707	305.498	2272	0.9678	276.519
ENSRNOG00000029133	Aes	1316	1465	0.9635	311.499	1732	0.9787	336.437	1841	0.9886	380.351	1804	0.9901	337.426	1503	0.9954	318.908	2040	0.9977	391.65	1647	0.9992	311.523	1697	0.9977	332.825	2027	0.9985	401.958	1435	0.9954	289.604	1757	0.9992	374.943	1647	0.9992	359.016
ENSRNOG00000012966	Acadl	1502	1446	0.9827	269.385	3173	0.9993	540.023	2516	0.9993	455.436	3307	0.998	541.954	2753	0.9967	511.798	2935	0.9993	493.698	233	0.9461	38.6134	233	0.9561	40.0384	233	0.9374	40.4827	95	0.8529	16.7982	95	0.9075	17.7625	95	0.787	18.1439
ENSRNOG00000023803	Cmya5	11109	1425	0.9572	35.8934	1709	0.977	39.326	978	0.9003	23.9359	2422	0.9888	53.6658	1783	0.9908	44.8166	1271	0.9574	28.9064	2037	0.9815	45.6424	2078	0.9933	48.2793	1637	0.9732	38.4553	1915	0.9914	45.7828	2051	0.9887	51.8489	1261	0.9766	32.5624
ENSRNOG00000008364	Cat	2436	1366	0.9782	156.909	1538	0.9967	161.395	1009	0.9951	112.616	1724	0.9984	174.204	1358	0.9967	155.663	1147	0.9988	118.962	1509	0.9984	154.193	1569	0.9971	166.24	1269	0.9967	135.946	102	0.7648	11.1207	101	0.8383	11.6438	95	0.775	11.1872
ENSRNOG00000013928	Dsp	8634	1358	0.9651	44.0112	1928	0.9836	57.083	1275	0.9659	40.1499	2729	0.9939	77.8018	2132	0.9937	68.9505	1673	0.9863	48.9562	2318	0.9944	66.8273	2380	0.9889	71.1468	1916	0.9965	57.9117	2256	0.9934	69.3962	2476	0.9921	80.5356	1688	0.9873	56.0837
ENSRNOG00000014230	Map1a	10110	1342	0.9224	37.143	1287	0.9813	32.5416	895	0.9339	24.069	1578	0.9714	38.4197	1152	0.9649	31.8173	1056	0.9613	26.3898	1277	0.9625	31.4407	1245	0.9714	31.784	1123	0.96	28.9876	1388	0.9779	36.4626	1411	0.9631	39.1945	1097	0.9685	31.1266
ENSRNOG00000020719	Hrc	2484	1328	0.9948	149.597	1999	0.9952	205.718	1430	0.9964	156.52	1658	0.9815	164.298	1762	0.9952	198.069	1641	0.994	166.909	1649	0.9815	165.242	1861	0.998	193.368	1628	0.9907	171.035	1639	0.9924	175.241	2076	0.9936	234.706	1547	0.998	178.655
ENSRNOG00000015278	Myl12a	1173	1325	0.902	316.077	2294	0.9565	499.928	2117	0.9165	490.692	2480	0.9088	520.417	1911	0.9591	454.909	2445	0.9275	526.628	2214	0.9284	469.82	2070	0.9523	455.473	2132	0.9062	474.321	2121	0.9523	480.233	2253	0.9156	539.402	2197	0.9429	537.289
ENSRNOG00000011343	LDB3	1369	1323	0.9803	270.416	1121	0.9963	209.322	882	0.9934	175.167	1155	0.9963	207.671	959	0.9978	195.604	936	0.9927	172.741	1024	0.9942	186.187	984	0.9942	185.516	999	0.9963	190.434	918	0.9963	178.094	1117	0.9942	229.139	900	0.9993	188.588
ENSRNOG00000022637	-	15552	1319	0.867	23.732	1758	0.9622	28.8965	1047	0.8685	18.304	1904	0.9698	30.1355	1684	0.9739	30.2356	1076	0.896	17.4803	1866	0.9788	29.866	1793	0.9825	29.7567	1207	0.9277	20.2537	1897	0.9765	32.3959	1900	0.9766	34.3097	1221	0.9188	22.5219
ENSRNOG00000042271	UBB	625	1312	0.7808	587.393	2719	0.7792	1112.09	2293	0.7824	997.495	2126	0.784	837.301	2071	0.7776	925.257	2137	0.7824	863.869	2226	0.7856	886.538	2241	0.8	925.448	2074	0.7824	865.988	1968	0.7808	836.284	2525	0.7776	1134.57	2098	0.7856	962.945
ENSRNOG00000017060	Ryr2	14817	1312	0.8756	24.777	1410	0.9379	24.326	1021	0.893	18.7349	2378	0.9631	39.5048	1594	0.9499	30.0393	1377	0.916	23.4799	1896	0.9522	31.8515	1796	0.9535	31.285	1596	0.9431	28.1097	2010	0.9678	36.0284	1883	0.9551	35.6894	1424	0.9295	27.5693
ENSRNOG00000001979	Rcan1	2133	1309	0.9925	171.721	1717	0.9944	205.775	1378	0.9991	175.649	2409	0.9995	278	1553	0.9934	203.302	1763	0.9981	208.826	2107	0.9986	245.882	1797	0.9986	217.444	1657	0.9995	202.728	1910	0.9934	237.822	1724	0.9967	226.984	1493	0.9981	200.791
ENSRNOG00000012207	Dst	22077	1265	0.7822	16.0334	1576	0.8919	18.2485	920	0.7722	11.3301	1820	0.8873	20.2922	1518	0.8584	19.1997	1180	0.7672	13.5041	1610	0.8705	18.1526	1597	0.876	18.6705	1348	0.8389	15.9343	1742	0.9145	20.9564	1908	0.9219	24.271	1094	0.8002	14.2152
ENSRNOG00000014656	Cox8b	357	1263	0.9692	989.943	2210	0.9496	1582.47	3090	0.9888	2353.3	1934	0.9608	1333.48	1717	0.9524	1342.96	3484	0.9888	2465.66	1813	0.9608	1264.1	1819	0.9524	1315.09	2852	0.9972	2084.8	1639	0.9496	1219.33	2280	0.9496	1793.56	2767	0.9916	2223.4
ENSRNOG00000024629	Hadha	2510	1254	0.9988	139.797	2278	0.998	232.002	1695	0.9984	183.604	2480	0.9988	243.207	2034	0.9976	226.276	1981	0.9984	199.404	2079	0.9968	206.174	2199	0.9968	226.121	2214	0.9992	230.19	2031	0.998	214.904	2374	0.998	265.617	1711	0.9988	195.548
ENSRNOG00000016243	Casq2	2456	1248	0.9805	142.188	2207	0.9967	229.713	1814	0.9971	200.815	2040	0.9935	204.456	1995	0.9914	226.818	2295	0.9963	236.09	1837	0.9902	186.18	2164	0.9984	227.415	2243	0.9906	238.333	1751	0.9927	189.351	2333	0.9951	266.769	2067	0.9963	241.428
ENSRNOG00000008289	Slc25a3	1327	1242	0.9427	261.894	3887	0.9834	748.783	3484	0.9653	713.828	3647	0.9488	676.493	3270	0.9691	688.08	4049	0.9555	770.904	3188	0.9955	597.998	3600	0.9744	700.2	3720	0.9781	731.569	3095	0.9902	619.439	3603	0.9864	762.505	3443	0.9872	744.29
ENSRNOG00000019422	Egr1	3114	1192	0.9435	107.111	1095	0.9929	89.8892	630	0.9923	55.0058	1211	0.9894	95.7246	779	0.9753	69.8523	605	0.982	49.0863	1078	0.9933	86.1693	945	0.9939	78.3256	725	0.9994	60.7579	1042	0.9865	88.8706	1048	0.9958	94.5131	715	0.9971	65.8663
ENSRNOG00000019223	Atp5c1	1954	1161	0.5281	166.258	2118	0.4867	277.085	2224	0.5113	309.454	2091	0.5368	263.407	1851	0.5404	264.511	2427	0.5358	313.811	1765	0.5363	224.839	2043	0.5363	269.857	2319	0.5353	309.713	1890	0.5358	256.889	2187	0.5358	314.321	2122	0.5619	311.528
ENSRNOG00000013391	Sorbs2	6305	1156	0.6985	51.3036	1649	0.7123	66.8571	1094	0.6966	47.1757	1756	0.7156	68.5548	1577	0.7118	69.8407	1270	0.6955	50.8911	1545	0.7264	60.9952	1708	0.7321	69.9187	1334	0.7026	55.2146	1305	0.6945	54.9711	1581	0.7037	70.42	1136	0.7126	51.6856
ENSRNOG00000014867	Synpo2	4092	1133	0.7119	77.4764	1049	0.7693	65.5318	699	0.7141	46.4438	1456	0.7925	87.5838	1080	0.7825	73.6971	1021	0.7466	63.0396	1132	0.7964	68.8594	1257	0.7847	79.2848	1219	0.7942	77.7412	1037	0.7595	67.3057	1231	0.8052	84.4835	908	0.7407	63.6541
ENSRNOG00000012512	Nexn	1971	1133	0.9696	160.849	1947	0.9975	252.517	1335	0.999	184.154	1677	0.9995	209.433	1761	0.997	249.479	1395	0.997	178.818	1801	0.9954	227.447	1893	0.9975	247.887	1418	0.999	187.747	1851	0.998	249.419	2006	0.9954	285.821	1283	0.997	186.731
ENSRNOG00000013331	Sdha	2277	1121	0.9824	137.758	2455	0.9873	275.614	1811	0.9838	216.243	2661	0.9982	287.66	2027	0.9934	248.572	2290	0.989	254.095	2186	0.9996	238.968	2287	0.9868	259.235	2314	0.9881	265.206	145	0.9144	16.9127	145	0.9161	17.8836	145	0.9174	18.2676
ENSRNOG00000016660	Cox5b	507	1100	0.9921	607.1	1683	0.9921	848.571	1761	0.9961	944.361	1413	0.9882	686.013	1331	0.9862	733.048	1784	0.9961	889.018	1372	0.9921	673.594	1401	0.9901	713.215	1711	0.9921	880.694	1221	0.9961	639.612	1520	0.9961	841.947	1606	0.9882	908.685
ENSRNOG00000018109	Clic4	3986	1097	0.9882	77.0095	1705	0.9947	109.345	1242	0.995	84.717	2022	0.9965	124.865	1618	0.998	113.345	1574	0.9977	99.7679	1723	0.99	107.597	1862	0.9905	120.568	1641	0.9947	107.437	1629	0.9955	108.541	1968	0.996	138.655	1387	0.994	99.8194
ENSRNOG00000011329	Pkm	2213	1079	0.4858	136.432	1537	0.4835	177.543	1323	0.4826	162.542	1595	0.4844	177.41	1300	0.4808	164.03	1407	0.4822	160.634	1478	0.4822	166.244	1442	0.4812	168.18	1398	0.4812	164.858	713	0.4799	85.5691	803	0.4763	101.902	649	0.4867	84.1277
ENSRNOG00000004621	Rtn4	4665	1055	0.9149	63.2814	1649	0.9861	90.361	1142	0.9299	66.5581	1777	0.9859	93.7635	1489	0.9738	89.1261	1266	0.9584	68.5655	1591	0.9839	84.8928	1682	0.9741	93.0603	1286	0.9908	71.9403	1503	0.9783	85.569	1810	0.964	108.962	1225	0.967	75.3287
ENSRNOG00000023781	Plec	14838	1051	0.8501	19.82	1510	0.9631	26.0144	1166	0.9212	21.3653	1655	0.9609	27.455	1149	0.908	21.6225	1146	0.8761	19.5134	1270	0.9236	21.305	1252	0.9269	21.7781	1242	0.9318	21.8439	1384	0.9507	24.7725	1532	0.9565	28.9956	1122	0.9168	21.6917
ENSRNOG00000009565	Pdk4	3474	1047	0.9588	84.3319	3867	0.9698	284.549	2377	0.9752	186.031	2052	0.9678	145.394	2878	0.9698	231.325	2797	0.9678	203.416	433	0.9634	31.0249	439	0.9439	32.6156	434	0.956	32.6019	180	0.865	13.7611	180	0.8307	14.551	179	0.7686	14.7808
ENSRNOG00000001030	Tsc22d1	4207	1047	0.7383	69.6385	1324	0.778	80.4503	1088	0.6915	70.3142	1684	0.8659	98.5298	1110	0.7333	73.6737	1513	0.7528	90.8636	1441	0.8398	85.2597	1306	0.7697	80.1237	1316	0.7566	81.6331	1539	0.8253	97.1572	1403	0.7754	93.6557	1033	0.7276	70.4375
ENSRNOG00000050145	AHNAK	16326	1043	0.698	17.8764	1795	0.761	28.1059	1184	0.7214	19.7178	2368	0.7698	35.7026	2006	0.77	34.3094	1454	0.735	22.5013	1848	0.7663	28.1757	2244	0.7571	35.4759	1608	0.7423	25.7033	1981	0.7741	32.2265	2402	0.7758	41.3183	1464	0.7249	25.7239
ENSRNOG00000008414	Bsg	1663	1042	0.8316	175.328	1278	0.8268	196.449	1387	0.837	226.762	1423	0.8497	210.625	1178	0.8328	197.795	1415	0.887	214.975	1282	0.8629	191.888	1204	0.8635	186.864	1479	0.8707	232.091	1200	0.8394	191.645	1335	0.9056	225.444	1398	0.8918	241.152
ENSRNOG00000025383	Pdha1	2814	1019	0.769	101.327	2103	0.7758	191.041	1564	0.7726	151.112	2238	0.7804	195.765	1941	0.7768	192.603	1822	0.7775	163.587	2040	0.7804	180.451	2267	0.7822	207.93	1831	0.7807	169.804	1973	0.7765	186.214	2206	0.7811	220.156	1598	0.774	162.903
ENSRNOG00000014182	Tns1	6113	996	0.912	45.5911	742	0.9416	31.0286	542	0.9285	24.1063	1104	0.9421	44.4542	789	0.9401	36.04	655	0.9167	27.0714	850	0.9359	34.6112	906	0.9496	38.2529	832	0.9414	35.5183	830	0.9391	36.0606	817	0.9326	37.5333	652	0.9045	30.5963
ENSRNOG00000048351	-	15941	981	0.638	17.2198	1287	0.7908	20.6384	1014	0.666	17.2945	1267	0.7858	19.5641	1039	0.7528	18.1996	821	0.6293	13.0122	1033	0.7489	16.1301	1107	0.7925	17.9235	820	0.6779	13.424	1383	0.8099	23.0418	1331	0.7938	23.4483	911	0.6912	16.3938
ENSRNOG00000010800	Hadhb	1920	980	0.9922	142.824	3518	0.9938	468.389	3106	0.9974	439.832	3410	0.9948	437.171	2846	0.9922	413.9	3665	0.9911	482.277	2948	0.9922	382.189	3414	0.9958	458.936	3416	0.9932	464.301	2907	0.9911	402.117	3400	0.9922	497.31	3161	0.9938	472.28
ENSRNOG00000019598	Vegfa	3543	979	0.9043	77.3191	1021	0.9627	73.6659	593	0.9385	45.5061	1267	0.9814	88.0245	828	0.9594	65.2561	729	0.9743	51.9852	1052	0.9845	73.9089	946	0.9709	68.9144	660	0.9517	48.6134	1075	0.9557	80.5835	1050	0.9627	83.2276	675	0.952	54.6523
ENSRNOG00000005569	Phospho1	1999	966	0.986	135.22	624	0.9825	79.7965	663	0.9915	90.1752	1011	0.9985	124.491	581	0.981	81.1569	716	0.9895	90.4948	829	0.9925	103.227	599	0.9875	77.34	738	0.991	96.3444	81	0.7769	10.7617	81	0.7344	11.3795	81	0.7284	11.6238
ENSRNOG00000008103	Mdh1	1240	962	0.9653	217.084	2806	0.9984	578.466	2473	0.9984	542.237	2309	0.9984	458.353	2243	0.9984	505.091	2836	0.9984	577.841	633	0.9984	127.067	633	0.9984	131.757	633	0.9984	133.219	80	0.9024	17.1347	80	0.9677	18.1183	80	0.9403	18.5074
ENSRNOG00000031364	Kif1c	4083	944	0.9684	64.6946	1015	0.9687	63.5475	950	0.9645	63.2602	1404	0.9868	84.642	1080	0.9787	73.8595	1244	0.9797	76.9776	1217	0.9799	74.1931	1230	0.9689	77.7528	1361	0.9687	86.9885	1177	0.9782	76.5607	1363	0.9733	93.7488	1075	0.9833	75.5275
ENSRNOG00000007862	Acat1	1519	942	0.9592	173.528	1834	0.9855	308.641	1349	0.9888	241.457	1803	0.9934	292.17	1618	0.9882	297.429	1574	0.9901	261.8	1432	0.9882	234.659	1808	0.9941	307.207	1583	0.9888	271.961	1359	0.9901	237.613	1949	0.9947	360.332	1446	0.9855	273.078
ENSRNOG00000006683	Nedd4	4786	937	0.9267	54.7825	1317	0.9791	70.3437	812	0.9674	46.1286	1482	0.9603	76.2208	1181	0.9868	68.9032	1058	0.9852	55.8517	1271	0.9881	66.1036	1349	0.9898	72.7494	1175	0.9737	64.069	1231	0.9824	68.3116	1345	0.9787	78.9221	946	0.9524	56.7015
ENSRNOG00000018117	Ndufv1	1537	934	0.9883	170.039	1978	0.9974	328.976	1690	0.9961	298.951	2031	0.9922	325.263	1590	0.9935	288.859	1970	0.9948	323.829	1774	0.9967	287.298	1742	0.9909	292.526	2017	0.9928	342.464	1671	0.9902	288.743	2062	0.9922	376.759	1635	0.9941	305.155
ENSRNOG00000017817	Cox4i1	696	933	0.9713	375.1	2899	0.9784	1064.76	3265	0.9799	1275.44	2590	0.9914	915.986	2235	0.9899	896.665	3507	0.977	1273.06	2455	0.9756	878	2629	0.9756	974.926	3376	0.9813	1265.83	2358	0.9756	899.795	2994	0.9741	1208.07	2907	0.9813	1198.15
ENSRNOG00000009088	Txnrd1	3433	925	0.9843	75.3951	1857	0.9936	138.277	1490	0.995	118.005	2284	0.9945	163.765	1627	0.9968	132.335	1811	0.9945	133.281	1880	0.993	136.313	1791	0.9927	134.652	1966	0.9927	149.449	161	0.8593	12.4555	161	0.8774	13.1705	161	0.8386	13.4533
ENSRNOG00000026700	Myom1	5554	902	0.8914	45.4439	1396	0.9166	64.2527	1129	0.9359	55.2681	1727	0.9483	76.5393	1390	0.9237	69.8829	1445	0.9528	65.7333	1492	0.9534	66.8675	1570	0.9424	72.9599	1454	0.9418	68.319	1410	0.9327	67.4252	1656	0.9454	83.7344	1298	0.9271	67.0417
ENSRNOG00000037284	Idh3g	1359	900	0.972	185.31	1267	0.9603	238.325	1109	0.9728	221.87	1264	0.9765	228.942	1012	0.9772	207.933	1140	0.9816	211.938	1140	0.9647	208.803	1082	0.9698	205.493	1112	0.9757	213.535	129	0.8793	25.2104	129	0.8852	26.6575	129	0.9124	27.2299
ENSRNOG00000000852	Prrc2a	6656	897	0.8969	37.7098	603	0.95	23.1588	450	0.8864	18.3817	768	0.9626	28.4018	570	0.9611	23.9124	566	0.9222	21.4846	631	0.9408	23.5976	633	0.9405	24.546	599	0.9585	23.4853	626	0.9599	24.9787	729	0.9407	30.7584	554	0.9241	23.8766
ENSRNOG00000007034	Hipk2	4851	887	0.9344	51.1644	664	0.9794	34.9904	467	0.9674	26.1741	790	0.9835	40.0861	583	0.9755	33.5583	466	0.9777	24.2705	144	0.7032	7.38896	144	0.7596	7.66164	144	0.7382	7.74666	718	0.9798	39.3099	641	0.9753	37.1087	499	0.9833	29.5084
ENSRNOG00000019974	Uba52	503	885	0.9821	492.323	1062	0.9901	539.72	1523	0.9901	823.225	972	0.9901	475.66	823	0.996	456.871	1465	0.9901	735.856	103	0.9185	50.9708	100	0.9841	51.3124	100	0.9642	51.8818	42	0.9304	22.1764	43	0.9602	24.0077	43	0.9364	24.5232
ENSRNOG00000032134	Uqcrc1	1586	883	0.9811	155.788	2132	0.9924	343.634	1948	0.9924	333.943	2179	0.9912	338.183	1733	0.9931	305.111	2060	0.9931	328.161	1895	0.9937	297.412	1882	0.995	306.272	2098	0.9931	345.212	1764	0.9931	295.396	2207	0.9931	390.794	1898	0.9937	343.296
ENSRNOG00000015602	Cdh2	4076	859	0.9369	58.9704	1323	0.9789	82.9732	959	0.9811	63.9692	1494	0.9953	90.2224	1242	0.9787	85.0843	1095	0.9762	67.874	1321	0.9885	80.6716	1444	0.9948	91.4373	1182	0.9971	75.6774	1202	0.9912	78.3212	1356	0.9863	93.4275	1054	0.9708	74.1792
ENSRNOG00000027049	Atp5j2	420	856	0.9643	570.295	672	0.9762	409.008	886	0.9714	573.55	637	0.9833	373.326	601	0.9524	399.565	1042	0.9833	626.819	677	0.9524	401.228	609	0.9381	374.247	1019	0.9571	633.152	584	0.969	369.294	788	0.9714	526.898	808	0.9905	551.872
ENSRNOG00000005434	Sptbn1	7323	852	0.9525	32.5556	987	0.9581	34.454	753	0.9481	27.9571	1632	0.9773	54.8567	1105	0.9661	42.1343	942	0.9656	32.5001	1259	0.9719	42.7946	1268	0.9863	44.691	1118	0.9687	39.8415	1301	0.9758	47.1843	1487	0.9754	57.0258	967	0.9783	37.8803
ENSRNOG00000017801	Atf4	1406	851	0.9708	169.363	1303	0.9893	236.903	1084	0.9893	209.619	78	0.7774	13.6555	78	0.8983	15.4907	78	0.8414	14.0163	1213	0.9794	214.747	1200	0.9879	220.286	1177	0.9858	218.461	354	0.9758	66.8693	354	0.9552	70.7078	354	0.9815	72.2261
ENSRNOG00000021079	Fxyd1	492	850	0.9533	483.425	825	0.9776	428.648	839	0.9878	463.643	727	0.9878	363.72	608	0.9776	345.065	854	0.9797	438.547	669	0.9756	338.465	665	0.9878	348.856	776	0.9776	411.604	649	0.9858	350.339	795	0.9878	453.786	739	0.9878	430.879
ENSRNOG00000037085	Xirp1	3384	846	0.9967	69.9544	1317	0.9967	99.4873	607	0.9953	48.7691	1628	0.9991	118.419	1217	0.9985	100.42	820	0.9991	61.2219	1518	0.9976	111.659	1374	0.9988	104.796	1066	0.9988	82.2072	1298	0.9976	101.872	1388	0.9982	115.188	847	0.9965	71.8008
ENSRNOG00000003256	Ccng1	3526	842	0.8874	66.8198	2417	0.9138	175.229	1697	0.9226	130.854	2333	0.9251	162.866	2201	0.9129	174.301	2140	0.9413	153.34	2098	0.9138	148.107	2445	0.9138	178.973	2120	0.9022	156.905	2118	0.9138	159.534	2537	0.9146	202.063	1791	0.9155	145.71
ENSRNOG00000007967	Sdhb	968	840	0.9917	242.817	1583	0.9979	418.04	1692	0.9969	475.238	135	0.9742	34.3286	135	0.9814	38.9422	135	0.9886	35.2356	1345	0.9979	345.859	1488	0.9969	396.751	1909	0.9979	514.652	1346	0.9969	369.299	1606	0.9969	465.929	1488	0.9979	440.964
ENSRNOG00000005290	Ywhae	2020	839	0.8901	116.221	1289	0.9569	163.122	1003	0.9366	135.001	1384	0.9733	168.649	1181	0.9599	163.253	1269	0.9772	158.721	1264	0.9772	155.757	1343	0.9639	171.599	1269	0.9658	163.943	1170	0.9421	153.831	1408	0.9594	195.749	1087	0.9213	154.367
ENSRNOG00000019525	Hspa9	2088	832	0.9943	111.498	1610	0.9986	197.109	1000	0.9995	130.213	406	0.9828	47.8623	403	0.9842	53.8935	393	0.988	47.5538	1508	0.9976	179.772	1619	0.9962	200.127	1422	0.9971	177.726	1437	0.9947	182.783	1787	0.9943	240.35	1131	0.9971	155.385
ENSRNOG00000023150	Gpi	2011	814	0.9861	113.263	1225	0.9925	155.717	1063	0.9915	143.717	1312	0.9925	160.591	1025	0.9925	142.323	1079	0.9915	135.56	1111	0.9925	137.516	1094	0.9925	140.409	1137	0.9945	147.547	78	0.7166	10.3013	78	0.7991	10.8926	78	0.7802	11.1265
ENSRNOG00000000805	Gja1	3127	813	0.945	72.7508	1014	0.991	82.8938	708	0.9843	61.559	1432	0.9898	112.723	920	0.9859	82.1527	866	0.9946	69.9703	1012	0.9875	80.5573	1001	0.9917	82.6221	894	0.9811	74.6092	1049	0.985	89.0957	960	0.9862	86.2169	818	0.9754	75.0415
ENSRNOG00000007584	Ehd4	3428	810	0.9787	66.118	1443	0.993	107.606	1141	0.9901	90.4964	1466	0.9974	105.267	1145	0.9945	93.2667	1268	0.9997	93.4549	1259	0.9947	91.4191	1355	0.9945	102.021	1237	0.9994	94.1699	1240	0.9907	96.0704	1611	0.9974	131.979	1111	0.9831	92.9714
ENSRNOG00000009364	Ndufb9	709	808	0.969	318.89	1586	0.9788	571.833	2087	0.9422	800.318	1355	0.9394	470.426	1298	0.976	511.2	2369	0.9619	844.194	1214	0.9394	426.211	1409	0.952	512.926	2218	0.9394	816.391	1268	0.9379	474.987	1688	0.976	668.614	1934	0.9732	782.503
ENSRNOG00000023227	-	1323	804	0.997	170.048	1373	0.9955	265.291	953	0.9962	195.848	1703	0.9977	316.849	1271	0.9977	268.255	1137	0.9992	217.132	1589	0.9977	298.962	1520	0.9955	296.534	1171	0.9962	230.983	1513	0.9962	303.73	1196	0.9955	253.875	1173	0.997	254.34
ENSRNOG00000018262	Ampd3	3919	804	0.9582	57.4058	852	0.9689	55.5746	603	0.9418	41.8339	1238	0.9788	77.7577	814	0.9788	57.9978	801	0.9867	51.6393	1052	0.9724	66.8179	983	0.9814	64.7394	869	0.9722	57.8665	958	0.9893	64.9231	919	0.9699	65.8551	761	0.9735	55.7039
ENSRNOG00000005041	Crip2	1168	802	0.9615	192.135	1367	0.9863	299.184	1287	0.9615	299.586	1324	0.9863	279.025	1121	0.9752	267.994	1390	0.9803	300.674	1132	0.9743	241.244	1236	0.9777	273.128	1411	0.9743	315.259	1131	0.9829	257.175	1401	0.9889	336.856	1278	0.9675	313.88
ENSRNOG00000036742	Uqcrc2	1824	801	0.7434	122.88	1958	0.7434	274.41	1538	0.744	229.255	2266	0.744	305.797	1554	0.7429	237.897	1727	0.7429	239.216	1751	0.744	238.954	1899	0.7429	268.714	1809	0.744	258.819	1676	0.7429	244.038	1685	0.744	259.432	1669	0.7429	262.487
ENSRNOG00000012249	Txlnb	4044	790	0.9313	54.6627	1218	0.9604	76.9925	761	0.9777	51.1635	1374	0.9686	83.6322	1092	0.9768	75.4004	819	0.9693	51.1677	1138	0.9822	70.046	1235	0.9832	78.8218	868	0.9815	56.0134	1130	0.9711	74.2124	1235	0.9926	85.764	851	0.975	60.3663
ENSRNOG00000020748	MAP4	5281	787	0.9672	41.6998	916	0.9644	44.3396	750	0.9457	38.6128	1163	0.9809	54.2078	838	0.9712	44.3088	905	0.9898	43.2968	1039	0.9896	48.9724	937	0.9907	45.7945	1038	0.9807	51.2937	940	0.9875	47.2738	991	0.9769	52.6995	902	0.9856	48.9966
ENSRNOG00000000571	Psap	2568	785	0.9502	85.5362	1514	0.9852	150.71	1224	0.9945	129.59	1663	0.9871	159.403	1283	0.9825	139.506	1465	0.9852	144.134	1388	0.9829	134.539	1514	0.9813	152.167	1410	0.9836	143.287	116	0.8213	11.997	116	0.8166	12.6856	116	0.7812	12.958
ENSRNOG00000038372	Ndufs2	1581	784	0.9975	138.758	1948	0.9981	314.97	1614	0.9975	277.561	1854	0.9981	288.653	1634	0.9981	288.591	1959	0.9975	313.059	1697	0.9981	267.179	1871	0.9994	305.444	1897	0.9981	313.126	1612	0.9981	270.796	1915	0.9994	340.162	1626	0.9975	295.029
ENSRNOG00000005195	Cst3	723	780	0.9253	301.878	1150	0.971	406.604	1389	0.971	522.337	1315	0.9654	447.698	921	0.9793	355.7	1385	0.9516	483.988	1232	0.971	424.155	994	0.9793	354.845	1244	0.9696	449.019	1121	0.9557	411.79	1125	0.9447	436.982	1386	0.9834	549.922
ENSRNOG00000022790	Obscn	14975	776	0.6239	14.5001	1215	0.7981	20.7406	887	0.7031	16.1044	1310	0.8087	21.5329	891	0.6926	16.614	884	0.6804	14.9145	1046	0.7724	17.3867	1074	0.7635	18.5109	1008	0.7635	17.5662	1054	0.7285	18.6932	1207	0.7923	22.6355	938	0.7127	17.9685
ENSRNOG00000015085	Dmpk	2607	768	0.9313	82.4319	865	0.9659	84.8178	689	0.9616	71.8563	907	0.9647	85.6376	725	0.982	77.6531	764	0.962	74.0416	744	0.9639	71.0369	762	0.9613	75.4404	774	0.9731	77.4788	739	0.9601	75.2857	966	0.9666	104.06	697	0.9624	76.6951
ENSRNOG00000047374	Gnas	720	763	0.6819	296.529	1226	0.6833	435.281	1252	0.6792	472.779	1193	0.6833	407.855	1119	0.6833	433.97	1289	0.6833	452.318	1101	0.6778	380.634	1194	0.6819	428.018	1093	0.6819	396.16	1167	0.6819	430.474	1253	0.6819	488.729	1123	0.6792	447.428
ENSRNOG00000005796	Ctnna1	3613	763	0.9889	59.0924	1341	0.9939	94.8796	997	0.9931	75.0263	1614	0.9958	109.96	1267	0.9936	97.9199	1278	0.9989	89.3689	1327	0.9967	91.4229	1456	0.9972	104.012	1338	0.997	96.6432	1291	0.9986	94.9002	1516	0.9925	117.837	1057	0.9972	83.9234
ENSRNOG00000001991	Atp5o	742	760	0.9946	286.606	1485	0.9906	511.605	1882	0.9852	689.608	1287	0.9946	426.946	1182	0.996	444.811	1987	0.996	676.577	1273	0.996	427.048	1269	0.9933	441.416	1819	0.996	639.752	1151	0.9906	411.984	1531	0.9933	579.456	1573	0.9852	608.136
ENSRNOG00000005512	Ndufa4	890	747	0.627	234.858	1803	0.6483	517.867	2258	0.5652	689.796	1591	0.627	440.026	1430	0.7303	448.65	2502	0.7562	710.266	1545	0.7101	432.106	1562	0.7146	452.982	2152	0.6989	631.009	1413	0.691	421.659	1673	0.6809	527.904	2081	0.5742	670.746
ENSRNOG00000027906	Ankrd11	7890	741	0.9395	26.2795	721	0.9641	23.3599	499	0.9023	17.1953	947	0.984	29.5441	737	0.9574	26.0827	708	0.9447	22.6715	843	0.9697	26.5952	715	0.9602	23.3894	696	0.9455	23.0205	876	0.9659	29.4874	864	0.9663	30.7529	682	0.9561	24.7961
ENSRNOG00000018294	Hspa5	2562	733	0.9512	80.0571	1757	0.9594	175.309	1342	0.9555	142.416	1547	0.9614	148.631	1603	0.9696	174.709	1501	0.95	148.022	271	0.9087	26.3295	271	0.9016	27.3011	271	0.9083	27.6041	1525	0.9551	158.088	1831	0.9703	200.705	1398	0.9688	156.532
ENSRNOG00000022392	Hspb8	1773	732	0.9898	115.525	1323	0.9938	190.749	871	0.9786	133.566	1504	0.9921	208.803	1010	0.9921	159.065	962	0.9938	137.085	1369	0.9972	192.197	1209	0.9977	175.998	968	0.9921	142.479	1279	0.9921	191.589	1246	0.9944	197.36	848	0.9825	137.203
ENSRNOG00000001172	Rnf10	3065	727	0.9706	66.3711	835	0.999	69.6415	681	0.9954	60.4092	1065	0.9974	85.5298	774	0.9984	70.5135	847	0.9879	69.8194	952	0.999	77.3141	925	0.9987	77.8936	930	0.999	79.1836	808	0.9948	70.0148	868	0.9967	79.5314	798	0.9961	74.6876
ENSRNOG00000013766	Acaa2	1613	722	0.9163	125.25	1352	0.9603	214.267	1418	0.9299	239.017	231	0.9051	35.2514	231	0.8859	39.9889	231	0.9163	36.1827	1208	0.933	186.417	1256	0.9188	200.977	1499	0.9337	242.522	1092	0.92	179.803	1490	0.9244	259.419	1392	0.9169	247.56
ENSRNOG00000016478	Eif5a	1306	707	0.925	151.479	1342	0.9671	262.677	1288	0.9877	268.139	1245	0.9816	234.652	1050	0.9954	224.496	1395	0.9931	269.87	1188	0.9908	226.426	1178	0.9709	232.805	1280	0.9816	255.77	1038	0.9678	211.088	1246	0.9763	267.932	1113	0.9625	244.471
ENSRNOG00000004019	Phlda1	1811	702	0.9431	108.466	707	0.9437	99.796	545	0.9503	81.821	820	0.8885	111.453	622	0.9735	95.9034	629	0.9371	87.7517	696	0.9083	95.6628	674	0.9221	96.0576	607	0.9006	87.4688	671	0.9459	98.4041	678	0.9277	105.138	539	0.9271	85.3781
ENSRNOG00000008639	Pabpc1	2795	697	0.9374	69.7792	812	0.98	74.2654	745	0.9753	72.4705	944	0.9914	83.1359	687	0.9721	68.6336	927	0.9953	83.7956	894	0.9936	79.6174	812	0.9746	74.9833	889	0.9975	83.0048	846	0.9975	80.3892	964	0.9803	96.86	786	0.9975	80.6709
ENSRNOG00000018645	Rpsa	1051	693	0.9182	184.504	1358	0.9696	330.3	1615	0.9458	417.788	1348	0.9657	315.708	1069	0.9477	284.012	1835	0.9657	441.12	1169	0.9648	276.862	1125	0.9734	276.274	1810	0.9638	449.427	1116	0.9657	282.014	1504	0.98	401.878	1463	0.961	399.317
ENSRNOG00000003029	Calr	2844	692	0.6333	68.085	908	0.6878	81.6147	903	0.666	86.3266	954	0.7015	82.569	855	0.6864	83.9457	1112	0.6684	98.7867	931	0.7004	81.484	949	0.6565	86.1245	1130	0.7286	103.689	873	0.6878	81.5255	1015	0.6705	100.227	906	0.7057	91.3849
ENSRNOG00000010117	Eif3a	5174	687	0.8102	37.154	1100	0.9577	54.3474	748	0.9385	39.3063	1171	0.9577	55.7094	1019	0.9623	54.9933	962	0.9863	46.9756	1162	0.9538	55.9026	1110	0.9685	55.3716	857	0.9494	43.2252	1176	0.977	60.3656	1176	0.9648	63.8308	761	0.9165	42.1924
ENSRNOG00000018795	Rpl18a	603	680	0.9784	315.549	891	0.9751	377.722	1204	0.9818	542.87	826	0.9768	337.179	729	0.9818	337.577	1362	0.9768	570.668	863	0.9718	356.242	812	0.9768	347.559	1219	0.9801	527.557	796	0.9801	350.594	888	0.9934	413.566	1046	0.9768	497.611
ENSRNOG00000014350	Cyr61	1984	675	0.9572	95.2001	1203	0.9934	155.002	588	0.9672	80.5791	705	0.994	87.4673	772	0.996	108.652	521	0.9803	66.3467	868	0.9758	108.901	882	0.9965	114.741	541	0.994	71.1604	809	0.9965	108.297	1045	0.9934	147.919	667	0.9824	96.4407
ENSRNOG00000001596	ATP5G3	689	674	0.9797	273.726	1836	0.984	681.186	1768	0.984	697.669	1439	0.9855	514.091	1346	0.9869	545.491	1971	0.9826	722.755	1316	0.9797	475.433	1565	0.9826	586.253	1768	0.9884	669.647	1360	0.9898	524.238	1732	0.9942	705.956	1694	0.9869	705.294
ENSRNOG00000004841	Akap6	8824	673	0.8068	21.3415	567	0.9091	16.4259	435	0.8234	13.4033	1038	0.9387	28.9554	651	0.8816	20.6005	493	0.8385	14.1158	789	0.9335	22.2569	687	0.9164	20.0947	549	0.9044	16.2364	799	0.9463	24.0486	737	0.9347	23.4559	432	0.8674	14.0441
ENSRNOG00000049560	Glul	2475	665	0.9907	75.1833	721	0.9939	74.4684	568	0.9943	62.3964	239	0.9794	23.7695	239	0.9636	26.964	239	0.9398	24.3975	35	0.4695	3.52002	35	0.4695	3.64992	35	0.5289	3.69042	720	0.9919	77.2621	698	0.9931	79.2008	620	0.9927	71.8609
ENSRNOG00000011849	Ndufs1	2674	662	0.9921	69.2742	1962	0.997	187.564	1506	0.9978	153.126	1991	0.997	183.277	1773	0.9993	185.144	1862	0.9978	175.931	1748	0.9959	162.717	2014	0.9948	194.396	1804	0.9951	176.059	1709	0.9974	169.742	2095	0.9951	220.025	1604	0.9955	172.075
ENSRNOG00000001148	Rplp0	1122	651	0.9554	162.354	1503	0.9608	342.435	1885	0.9813	456.778	1398	0.9519	306.699	1087	0.9501	270.52	2129	0.9519	479.409	1262	0.9848	279.975	1307	0.9581	300.658	2249	0.9545	523.094	1190	0.9519	281.685	1293	0.9545	323.635	1602	0.9545	409.587
ENSRNOG00000015658	Sorbs1	3873	651	0.6179	47.0337	559	0.6736	36.8958	374	0.6285	26.2549	884	0.6328	56.1827	626	0.6272	45.1325	451	0.6292	29.4207	639	0.6277	41.0682	661	0.6266	44.0498	539	0.6238	36.3182	678	0.621	46.4934	652	0.655	47.2769	477	0.6233	35.3303
ENSRNOG00000027230	Fhod3	4741	648	0.9584	38.2455	861	0.9928	46.4243	610	0.969	34.9821	1133	0.9918	58.8245	878	0.9854	51.7114	795	0.9842	42.3663	937	0.9943	49.1951	947	0.9848	51.5549	888	0.9806	48.8794	902	0.9827	50.5296	999	0.9964	59.1759	795	0.9852	48.1031
ENSRNOG00000030019	Atp1a1	3636	646	0.9329	49.7146	779	0.9381	54.7679	612	0.9519	45.763	974	0.9835	65.9376	662	0.9626	50.8389	770	0.9829	53.5045	840	0.9917	57.5053	720	0.9642	51.1092	738	0.9794	52.9682	804	0.9895	58.7274	735	0.9607	56.7692	742	0.9857	58.5404
ENSRNOG00000047218	CLIC5	2132	646	0.9259	84.7853	461	0.9493	55.2746	405	0.9198	51.6481	684	0.9864	78.9709	450	0.9522	58.9369	529	0.9644	62.6891	550	0.9672	64.2137	511	0.962	61.862	534	0.9625	65.3638	562	0.9578	70.0097	570	0.9714	75.0822	493	0.9606	66.3339
ENSRNOG00000002896	Prdx6	1412	644	0.9504	127.622	1048	0.9943	189.731	886	0.9965	170.603	1091	0.995	190.19	847	0.9795	167.498	979	0.9901	175.175	156	0.9001	27.5006	156	0.8569	28.5154	156	0.915	28.8319	832	0.9894	156.494	1047	0.9908	208.239	818	0.9795	166.186
ENSRNOG00000002579	Parm1	940	644	0.9734	191.705	559	0.9915	152.018	378	0.9872	109.333	639	0.9936	167.329	536	0.9957	159.221	441	0.9777	118.532	525	0.9862	139.022	596	0.966	163.647	466	0.984	129.372	454	0.9883	128.274	550	0.9947	164.318	435	0.9851	132.751
ENSRNOG00000023465	DEPP	1265	637	0.9976	140.904	769	0.9945	155.399	510	0.9921	109.614	836	0.9921	162.672	600	0.9968	132.441	526	0.9945	105.055	800	0.9937	157.417	629	0.9897	128.337	532	0.9945	109.75	671	0.9976	140.877	808	0.9921	179.378	626	0.9929	141.958
ENSRNOG00000020938	Ppp1r15a	2009	629	0.9438	87.6084	781	0.993	99.3764	547	0.9975	74.0276	755	0.991	92.505	644	0.9681	89.5093	548	0.989	68.9166	733	0.996	90.8189	687	0.9881	88.2606	583	0.9886	75.7306	701	0.9846	92.6717	758	0.9871	105.959	561	0.989	80.1049
ENSRNOG00000011419	Aldh6a1	3289	628	0.8455	53.4283	1616	0.9888	125.6	1042	0.9912	86.1371	1175	0.9906	87.9371	936	0.9894	79.4647	876	0.969	67.292	158	0.8635	11.9576	169	0.8474	13.2621	158	0.8164	12.5365	144	0.796	11.6281	145	0.8404	12.3809	134	0.7847	11.6874
ENSRNOG00000010697	Hadh	1659	626	0.9861	105.585	1335	0.9982	205.706	947	0.9976	155.199	1371	0.9976	203.418	1225	0.9958	206.182	1140	0.9988	173.613	1154	0.9988	173.146	1249	0.9831	194.315	1103	0.9988	173.505	1089	0.9958	174.337	1280	0.994	216.677	983	0.9964	169.974
ENSRNOG00000042503	Ndufv2	852	617	0.9883	202.638	1468	0.9906	440.452	1897	0.9918	605.361	1325	0.9953	382.802	1298	0.9859	425.4	2103	0.9883	623.624	1274	0.9965	372.205	1373	0.9906	415.931	1827	0.9883	559.605	1204	0.9883	375.315	1590	0.9859	524.091	1634	0.9883	550.159
ENSRNOG00000004478	Srrm2	8131	615	0.8865	21.1644	651	0.9266	20.4668	418	0.8705	13.9772	788	0.9608	23.8551	592	0.9252	20.3301	548	0.9311	17.0279	658	0.892	20.1435	669	0.9244	21.236	617	0.9431	19.8027	653	0.9219	21.3294	697	0.9562	24.0734	536	0.9209	18.9102
ENSRNOG00000003330	Acsf2	3083	613	0.9053	55.6368	490	0.9598	40.6289	390	0.9497	34.3936	561	0.9763	44.7907	367	0.9056	33.2395	343	0.9507	28.1089	588	0.9646	47.474	531	0.9741	44.454	470	0.9598	39.7839	60	0.5605	5.16876	73	0.5738	6.64965	65	0.6208	6.04806
ENSRNOG00000010350	Rcan2	3346	613	0.9462	51.2637	816	0.9943	62.3414	709	0.9964	57.6112	1029	0.9821	75.6986	758	0.9785	63.2565	808	0.9892	61.0111	1009	0.9913	75.0615	872	0.9892	67.2637	854	0.9857	66.6062	913	0.98	72.4693	911	0.9907	76.4613	819	0.9883	70.2157
ENSRNOG00000030639	Usp13	5044	608	0.8912	33.729	921	0.9873	46.6763	625	0.934	33.6893	1171	0.9703	57.1452	871	0.9685	48.2176	798	0.9726	39.9716	978	0.982	48.2632	947	0.9657	48.458	857	0.9715	44.3393	949	0.9673	49.9689	1094	0.9927	60.9104	775	0.98	44.076
ENSRNOG00000010765	Vcl	5270	603	0.9241	32.0171	777	0.9873	37.6897	594	0.9687	30.6452	1075	0.9765	50.2107	804	0.959	42.5998	704	0.9732	33.7509	830	0.9676	39.203	905	0.9586	44.3229	726	0.9856	35.9508	817	0.9607	41.1737	887	0.9742	47.2675	637	0.952	34.6741
ENSRNOG00000004496	Rock2	4209	600	0.9252	39.8885	923	0.9772	56.0577	536	0.9525	34.6236	1032	0.9838	60.353	904	0.9865	59.9724	576	0.9912	34.5754	778	0.9846	46.0101	910	0.9919	55.8024	625	0.9722	38.7511	849	0.9762	53.572	1002	0.9941	66.8556	582	0.9537	39.6661
ENSRNOG00000009845	Acadm	1953	600	0.9514	85.9655	1809	0.9677	236.782	1424	0.9667	198.241	286	0.9288	36.0464	286	0.9555	40.8908	286	0.9529	36.9988	1561	0.9642	198.954	1784	0.9677	235.767	1565	0.9631	209.12	1435	0.9688	195.146	1944	0.9631	279.54	1447	0.9662	212.541
ENSRNOG00000026319	Akap9	12068	597	0.7183	13.8425	766	0.8275	16.2258	511	0.6924	11.5126	1015	0.8697	20.7028	746	0.79	17.261	602	0.7441	12.6033	785	0.7971	16.1915	801	0.8118	17.1312	631	0.7604	13.6451	792	0.8403	17.4301	843	0.837	19.6174	583	0.7488	13.8583
ENSRNOG00000002021	Son	8440	593	0.8007	19.6602	1019	0.9705	30.8634	724	0.9242	23.3229	1033	0.9896	30.127	891	0.9498	29.478	765	0.9341	22.9004	969	0.9697	28.5781	1017	0.9744	31.1006	777	0.9467	24.0249	955	0.9496	30.0518	1024	0.9617	34.0727	811	0.9451	27.5648
ENSRNOG00000005061	Dlst	2779	593	0.9568	59.7092	963	0.9856	88.5829	795	0.9928	77.7795	134	0.8255	11.869	134	0.7816	13.4641	135	0.8996	12.2735	943	0.978	84.4647	1013	0.9975	94.083	980	0.9856	92.0281	984	0.9924	94.0406	1081	0.9942	109.241	834	0.978	86.0902
ENSRNOG00000018110	Svil	6504	593	0.92	25.5123	741	0.9666	29.1239	469	0.9371	19.6055	1136	0.9769	42.9928	790	0.98	33.9163	634	0.9651	24.6282	885	0.9788	33.87	875	0.9822	34.723	750	0.9763	30.0929	830	0.9822	33.8927	878	0.9745	37.9108	644	0.9522	28.4041
ENSRNOG00000029260	Pitpnm2	6325	592	0.8368	26.1901	518	0.939	20.9354	330	0.837	14.1853	735	0.9662	28.6039	521	0.9251	23.0006	314	0.83	12.5427	593	0.9271	23.3371	557	0.9355	22.7292	443	0.9331	18.2779	519	0.9126	21.7929	609	0.9396	27.04	440	0.8604	19.9558
ENSRNOG00000000851	Bag6	3612	589	0.9366	45.6292	530	0.982	37.5094	509	0.9648	38.3139	692	0.992	47.1581	542	0.979	41.9	523	0.972	36.5828	573	0.9859	39.4875	607	0.9936	43.3742	586	0.9779	42.3382	523	0.9792	38.4559	637	0.99	49.5269	573	0.9743	45.5075
ENSRNOG00000014625	Atp5d	920	587	0.9924	178.536	979	0.9957	272.024	1095	0.9924	323.603	934	0.9902	249.895	807	0.9761	244.933	1101	0.988	302.359	851	0.9957	230.247	822	0.988	230.608	1092	0.988	309.755	806	0.9826	232.678	1015	0.9967	309.833	989	0.9913	308.379
ENSRNOG00000005690	Lmcd1	1660	585	0.9494	98.6105	1457	0.9819	224.369	951	0.9873	155.761	1173	0.9976	173.935	1214	0.9928	204.208	1295	0.9819	197.099	1196	0.9988	179.339	1337	0.9988	207.88	1187	0.9988	186.606	1090	0.994	174.392	1265	0.997	214.009	900	0.9976	155.529
ENSRNOG00000029910	Golga4	6777	579	0.9209	23.9065	780	0.9761	29.4218	518	0.9121	20.7816	993	0.9734	36.067	851	0.9692	35.0634	634	0.9309	23.6361	897	0.9649	32.9463	813	0.9746	30.963	677	0.9683	26.0696	907	0.9708	35.545	972	0.9671	40.2789	657	0.9364	27.8102
ENSRNOG00000001414	Serpine1	3063	577	0.9654	52.7113	607	0.9879	50.6587	540	0.9703	47.9329	761	0.9922	61.1555	621	0.9749	56.6118	903	0.9938	74.4842	149	0.8106	12.1085	152	0.8162	12.8082	144	0.8583	12.2687	708	0.9974	61.3897	672	0.9944	61.6129	679	0.9944	63.5915
ENSRNOG00000010589	Fam134b	3104	573	0.8006	51.6545	832	0.8869	68.5194	591	0.8405	51.7669	1190	0.9272	94.3677	759	0.874	68.2782	724	0.886	58.9305	993	0.8582	79.6306	919	0.8831	76.416	696	0.8756	58.5154	993	0.9059	84.9643	877	0.8737	79.3464	669	0.8405	61.8273
ENSRNOG00000001344	ALDH2	1881	570	0.9394	84.7933	1046	0.9995	142.153	856	0.9979	123.729	1220	0.9862	159.65	926	0.9835	137.463	935	0.9947	125.587	1033	0.9835	136.698	1087	0.9995	149.153	1029	0.9952	142.761	78	0.739	11.0132	78	0.7501	11.6454	78	0.815	11.8955
ENSRNOG00000002848	Maoa	1823	568	0.9528	87.184	1253	0.9945	175.702	932	0.9945	139	1548	0.9956	209.017	1122	0.9934	171.857	1176	0.9973	162.984	192	0.9742	26.216	192	0.9819	27.1835	195	0.9824	27.9146	1103	0.9973	160.693	1344	0.9918	207.044	1083	0.9929	170.419
ENSRNOG00000013961	Ghitm	1524	567	0.9665	104.105	1612	0.9797	270.391	1527	0.9928	272.421	1602	0.9843	258.747	1384	0.9829	253.579	1765	0.9974	292.606	1465	0.9829	239.279	1588	0.9862	268.94	1710	0.9856	292.816	1350	0.9869	235.265	1579	0.9921	290.969	1396	0.9869	262.77
ENSRNOG00000010331	Ctsb	1942	567	0.9768	81.6976	728	0.9804	95.8284	699	0.9763	97.8621	827	0.9861	104.822	613	0.9753	88.1401	807	0.9737	104.99	753	0.9804	96.5157	733	0.9773	97.4193	681	0.9773	91.5126	67	0.758	9.16293	67	0.8048	9.68891	67	0.7281	9.89695
ENSRNOG00000017546	Mylk3	2732	566	0.9693	57.971	1190	0.9663	111.347	800	0.9806	79.6152	1355	0.978	122.083	1074	0.9777	109.771	1071	0.9846	99.0449	1102	0.978	100.404	1268	0.9905	119.792	1050	0.9824	100.298	1046	0.9777	101.686	1409	0.9747	144.837	903	0.9824	94.8163
ENSRNOG00000018281	Uqcrfs1	1309	565	0.8633	120.777	1608	0.958	314.021	1434	0.974	297.849	1529	0.9603	287.519	1278	0.9572	272.617	1620	0.987	312.679	1405	0.9633	267.171	1391	0.984	274.27	1564	0.958	311.803	1335	0.958	270.864	1661	0.9687	356.352	1352	0.958	296.287
ENSRNOG00000048057	Zfp106	4899	563	0.9141	32.157	709	0.942	36.9957	591	0.9324	32.7994	1042	0.9386	52.355	845	0.9433	48.1628	700	0.933	36.1006	819	0.9457	41.613	887	0.9433	46.7311	837	0.9414	44.5863	862	0.9422	46.7314	905	0.9416	51.8789	711	0.9386	41.633
ENSRNOG00000005890	SERBP1	1854	562	0.8188	84.8207	970	0.9417	133.744	800	0.952	117.319	1094	0.9439	145.247	837	0.9622	126.06	969	0.9223	132.05	972	0.9412	130.499	932	0.966	129.747	915	0.9428	128.794	914	0.9196	130.932	1062	0.9687	160.866	804	0.9288	124.401
ENSRNOG00000003975	Pfn1	853	561	0.9297	184.03	600	0.891	179.81	556	0.9261	177.22	605	0.9625	174.584	456	0.8617	149.272	652	0.9238	193.118	504	0.9086	147.073	552	0.9039	167.025	582	0.9039	178.056	495	0.8898	154.122	486	0.8851	160.006	496	0.8687	166.805
ENSRNOG00000034242	Vcp	3194	561	0.9869	49.1477	1706	0.9944	136.539	1303	0.9975	110.916	1678	0.9984	129.317	1431	0.9966	125.103	1496	0.9987	118.337	1548	0.9966	120.639	1659	0.9987	134.061	1504	0.9991	122.884	1417	0.9981	117.827	1782	0.9972	156.683	1378	0.9969	123.763
ENSRNOG00000023520	Cs	1629	558	0.9957	95.8492	1281	0.9945	201.02	944	0.9914	157.557	1581	0.9963	238.896	1180	0.9926	202.266	1163	0.9926	180.377	1202	0.9957	183.669	1385	0.992	219.442	1340	0.9951	214.668	96	0.9454	15.6516	96	0.9312	16.5501	96	0.8735	16.9054
ENSRNOG00000010989	Ipo5	3916	556	0.9543	39.729	1317	0.9987	85.9716	802	0.9844	55.6824	1458	0.9985	91.6459	1170	0.9987	83.4267	1073	0.9985	69.2278	1196	0.9962	76.0222	1314	0.9982	86.605	1054	0.9992	70.2394	1219	0.9977	82.6742	1403	0.9964	100.615	887	0.9959	64.9766
ENSRNOG00000026930	Ndufa9	1250	555	0.9832	124.239	1097	0.9728	224.341	966	0.9792	210.113	1032	0.972	203.221	867	0.996	193.674	1114	0.9816	225.164	969	0.9856	192.959	917	0.9952	189.343	1009	0.972	210.651	817	0.9784	173.589	1048	0.988	235.451	957	0.9728	219.623
ENSRNOG00000033765	Eif1	1074	549	0.8268	143.035	1115	0.8296	265.389	1034	0.8287	261.76	1092	0.8277	250.274	963	0.8268	250.371	1210	0.8305	284.646	992	0.8296	229.911	1061	0.8259	254.977	975	0.8259	236.91	980	0.8287	242.343	1215	0.8268	317.703	988	0.8268	263.893
ENSRNOG00000030680	Ddx5	2380	547	0.8853	64.311	1205	0.9803	129.426	794	0.9504	90.7048	1356	0.9643	140.243	1106	0.9634	129.76	975	0.963	103.503	1084	0.9555	113.372	1194	0.9639	129.484	954	0.9811	104.605	1080	0.9576	120.519	1302	0.9622	153.633	891	0.9584	107.393
ENSRNOG00000010438	Cpt1b	2829	543	0.9678	53.7084	1097	0.9954	99.1256	802	0.9968	77.0776	1317	0.9982	114.591	928	0.9965	91.5961	933	0.9968	83.3244	1021	0.9996	89.8349	1042	0.9922	95.066	997	0.9915	91.9698	970	0.9961	91.0642	1134	0.9979	112.572	839	0.9915	85.0756
ENSRNOG00000021808	Tecr	1170	542	0.8009	129.625	708	0.8171	154.689	706	0.7718	164.061	641	0.794	134.856	557	0.8239	132.933	722	0.7342	155.91	544	0.8162	115.735	648	0.8077	142.948	690	0.8111	153.903	268	0.7547	60.8356	328	0.7701	78.7295	300	0.7923	73.5549
ENSRNOG00000001049	Tpt1	855	537	0.6947	175.745	1364	0.7053	407.812	1614	0.6959	513.244	1185	0.6947	341.154	1136	0.7064	371	1874	0.7006	553.767	1102	0.7099	320.825	1288	0.6924	388.812	1461	0.7064	445.93	1135	0.6959	352.565	1323	0.6912	434.553	1466	0.6982	491.863
ENSRNOG00000009956	Wnk1	10329	536	0.7106	14.5205	523	0.7687	12.9436	360	0.6318	9.47612	747	0.7941	17.8017	524	0.7319	14.1656	474	0.6964	11.5943	584	0.7659	14.0737	607	0.7769	15.1677	527	0.7444	13.3148	587	0.7827	15.0935	589	0.7787	16.0142	440	0.7193	12.22
ENSRNOG00000016047	Macf1	16293	526	0.5551	9.03358	585	0.6179	9.1784	313	0.4452	5.22312	763	0.6322	11.5271	570	0.63	9.76868	444	0.5573	6.88502	642	0.598	9.80813	608	0.6313	9.63147	526	0.5618	8.42496	705	0.629	11.492	742	0.642	12.7895	460	0.5257	8.09903
ENSRNOG00000016356	Got1	1963	526	0.9791	74.9792	1170	0.999	152.362	993	0.9929	137.536	1115	0.9985	139.815	987	0.9954	140.397	1116	0.9969	143.637	952	0.9985	120.717	1078	0.9964	141.739	1191	0.999	158.334	65	0.7662	8.79431	65	0.6969	9.29913	65	0.6872	9.49881
ENSRNOG00000018145	Crat	2728	522	0.9696	53.5428	909	0.9978	85.1788	709	0.9971	70.6624	994	0.9993	89.6892	786	0.9864	80.4526	733	0.9989	67.8864	799	0.9945	72.9046	840	0.9963	79.474	805	0.9949	77.0078	768	0.9996	74.7697	943	0.9897	97.0771	773	0.9956	81.2851
ENSRNOG00000018183	Ubr4	15828	520	0.6415	9.1929	632	0.7356	10.2071	487	0.677	8.36545	828	0.7628	12.8766	659	0.728	11.6258	565	0.6681	9.01874	832	0.7794	13.0843	717	0.7499	11.6919	725	0.7789	11.9535	691	0.7254	11.5947	797	0.7637	14.141	680	0.7391	12.3242
ENSRNOG00000006146	Trim54	1411	519	0.9986	102.924	1075	0.9965	194.757	810	0.9986	156.079	1001	0.9986	174.625	835	0.9979	165.242	950	0.9979	170.106	937	0.9965	165.297	875	0.9901	160.056	1003	0.9979	185.506	841	0.9972	158.299	1093	0.9908	217.542	803	0.9979	163.254
ENSRNOG00000026963	Hsp90b1	2803	518	0.9229	51.7109	877	0.9757	79.9813	665	0.98	64.5038	978	0.9786	85.8843	786	0.9893	78.3	857	0.97	77.2469	863	0.9929	76.6373	907	0.9843	83.5169	811	0.98	75.5059	809	0.9725	76.6539	956	0.985	95.782	711	0.9797	72.765
ENSRNOG00000010633	Acsl1	3661	516	0.9055	39.4389	1033	0.9858	72.1295	689	0.9962	51.1689	216	0.9099	14.5229	216	0.8989	16.4746	216	0.8323	14.9066	966	0.9978	65.6795	1019	0.9975	71.8397	854	0.9913	60.8753	925	0.9956	67.1044	1063	0.9954	81.5423	751	0.9899	58.8459
ENSRNOG00000013963	Il6st	7457	509	0.7562	19.0998	713	0.9254	24.442	511	0.8883	18.6313	962	0.9214	31.7548	713	0.8886	26.6985	669	0.895	22.6665	114	0.5069	3.80534	113	0.4739	3.91115	113	0.4467	3.95455	785	0.9249	27.9585	802	0.9158	30.2037	610	0.912	23.4661
ENSRNOG00000009628	Pfkm	2883	507	0.9407	49.2083	873	0.9747	77.4073	805	0.9549	75.9168	1006	0.9788	85.8918	809	0.9612	78.3549	878	0.9535	76.9437	845	0.958	72.9566	945	0.9729	84.6014	1026	0.9629	92.8722	54	0.5227	4.9746	54	0.598	5.26015	54	0.5605	5.3731
ENSRNOG00000007407	Ndufa12	549	506	0.9945	257.901	794	0.9927	369.709	971	0.9854	480.876	682	0.9872	305.781	629	0.9964	319.919	973	0.9945	447.779	679	0.9891	307.857	682	0.9854	320.629	909	0.9945	432.09	612	0.9927	296.066	856	0.9891	437.876	807	0.9854	421.674
ENSRNOG00000010966	Itgb1	3658	506	0.9762	38.7063	1115	0.9945	77.919	822	0.9888	61.0963	1383	0.9959	93.0629	1054	0.9874	80.4561	1011	0.9945	69.8282	1203	0.9959	81.8605	1206	0.9959	85.093	1014	0.9945	72.3398	1106	0.9956	80.3009	1234	0.9962	94.7372	874	0.9943	68.5399
ENSRNOG00000014496	Coro6	2782	503	0.8943	50.5925	386	0.9605	35.4685	303	0.8947	29.6123	500	0.9817	44.2396	366	0.9198	36.7355	363	0.9295	32.9665	440	0.9443	39.3684	373	0.94	34.6052	364	0.9734	34.145	462	0.9547	44.1056	447	0.9288	45.1232	384	0.9493	39.5959
ENSRNOG00000022999	Ppp2r3a	5195	501	0.6633	26.9853	788	0.7467	38.7751	590	0.698	30.8783	990	0.7578	46.9081	734	0.7921	39.4523	609	0.7197	29.618	795	0.7698	38.092	824	0.7064	40.9385	639	0.7334	32.0995	792	0.7582	40.4901	824	0.7386	44.5442	636	0.6905	35.1194
ENSRNOG00000006542	Atp6v0c	1157	498	0.9058	120.44	641	0.9637	141.624	533	0.9862	125.251	557	0.9585	118.5	473	0.9594	114.154	573	0.9628	125.125	564	0.9646	121.338	549	0.962	122.47	566	0.9948	127.663	464	0.9594	106.511	623	0.9611	151.218	532	0.9931	131.903
ENSRNOG00000015380	Jup	3437	497	0.8225	40.4624	564	0.8833	41.948	394	0.8641	31.1676	739	0.8755	52.9253	498	0.8848	40.4587	490	0.8746	36.0197	561	0.8813	40.6289	550	0.8711	41.3022	554	0.9113	42.0643	504	0.8996	38.9457	549	0.9127	44.8582	431	0.8813	35.9728
ENSRNOG00000010239	Cnbp	1642	494	0.9458	84.1839	1705	0.9866	265.438	1384	0.9915	229.166	1538	0.9939	230.559	1334	0.9848	226.853	1693	0.989	260.5	1353	0.9903	205.105	1677	0.9951	263.603	1454	0.9848	231.086	118	0.8764	19.0861	118	0.9421	20.1817	118	0.877	20.6151
ENSRNOG00000008943	PENK	1284	493	0.9657	107.438	897	0.9883	178.583	807	0.9938	170.881	857	0.9907	164.291	801	0.9899	174.193	870	0.9945	171.19	840	0.9899	162.842	871	0.9961	175.083	916	0.9883	186.172	767	0.9891	158.65	1005	0.9868	219.811	724	0.9922	161.752
ENSRNOG00000047586	-	5551	493	0.1818	24.8514	610	0.1702	28.0912	391	0.1931	19.151	470	0.1611	20.8413	437	0.1405	21.9823	316	0.1706	14.3827	492	0.14	22.0621	497	0.1564	23.1087	355	0.1546	16.6894	533	0.1773	25.5015	561	0.1547	28.3819	348	0.1486	17.9839
ENSRNOG00000001825	PKP2	1792	492	0.904	76.825	706	0.952	100.711	615	0.952	93.309	660	0.9509	90.6576	581	0.9369	90.5316	601	0.9498	84.7344	657	0.9498	91.2598	660	0.9526	95.0596	617	0.9509	89.8525	612	0.9816	90.7031	722	0.9464	113.148	590	0.9542	94.4474
ENSRNOG00000002390	Gnb2l1	1097	491	0.9827	125.242	1018	0.9818	237.221	1189	0.9954	294.688	926	0.9954	207.779	683	0.9872	173.851	1248	0.9845	287.43	839	0.9836	190.374	892	0.9954	209.869	1158	0.9872	275.477	790	0.9909	191.262	858	0.9954	219.649	943	0.9836	246.593
ENSRNOG00000031479	Hdlbp	4386	491	0.9213	31.3248	774	0.9596	45.1112	562	0.9783	34.8381	970	0.9973	54.4379	721	0.9829	45.9017	673	0.9843	38.7677	767	0.9834	43.529	882	0.9961	51.9027	781	0.9742	46.4692	49	0.3837	2.96713	49	0.4099	3.13745	49	0.3999	3.20482
ENSRNOG00000024852	Tmx4	4948	489	0.8587	27.6538	1227	0.9818	63.3909	964	0.9723	52.9705	1555	0.9875	77.3569	1134	0.9713	63.9949	1220	0.9796	62.2951	1224	0.9802	61.5749	1326	0.9784	69.1678	1203	0.9755	63.4481	1265	0.982	67.9	1252	0.9814	71.0598	1024	0.959	59.3672
ENSRNOG00000033790	Hnrnpu	3344	485	0.9447	40.5836	919	0.9821	70.2524	635	0.9836	51.629	1004	0.991	73.9036	802	0.9862	66.9684	845	0.9859	63.8431	873	0.9862	64.9831	881	0.9961	67.9986	676	0.9868	52.755	962	0.9877	76.4043	967	0.9889	81.21	684	0.9815	58.6767
ENSRNOG00000010807	Cox6c	464	484	0.9655	291.879	1646	0.9483	906.826	2099	0.9591	1229.93	1357	0.931	719.88	1393	0.9483	838.292	2571	0.9547	1399.93	1434	0.931	769.278	1532	0.9353	852.179	2326	0.9569	1308.2	1368	0.9784	783.028	1698	0.9375	1027.71	1876	0.9483	1159.82
ENSRNOG00000006375	Vdac1	1800	484	0.6467	75.2399	1242	0.6828	176.385	1188	0.6794	179.445	1235	0.6867	168.886	1016	0.6772	157.61	1262	0.6872	177.137	1096	0.6778	151.562	1232	0.6839	176.656	1234	0.6822	178.906	1172	0.6856	172.927	1135	0.6817	177.081	1186	0.6839	189.011
ENSRNOG00000004172	Pdk2	1277	479	0.9264	104.959	424	0.9405	84.8764	364	0.9327	77.4992	575	0.9319	110.835	398	0.9272	87.027	389	0.9287	76.963	69	0.8285	13.4496	69	0.7909	13.946	69	0.7706	14.1007	439	0.9264	91.3025	464	0.935	102.041	330	0.9233	74.1309
ENSRNOG00000018114	Acadvl	2121	477	0.9844	62.9293	1136	0.9986	136.915	1019	0.9981	130.623	802	0.9986	93.0748	672	0.9976	88.4689	753	0.9995	89.697	990	0.9972	116.184	1082	0.9981	131.667	1159	0.9995	142.602	58	0.7671	7.26267	58	0.7185	7.67956	58	0.6686	7.84446
ENSRNOG00000017202	-	2189	477	0.9338	60.9744	1028	0.9411	120.049	862	0.9447	107.065	1106	0.9338	124.368	906	0.9461	115.57	1006	0.9497	116.112	912	0.9356	103.705	1005	0.9388	118.498	958	0.9333	114.21	934	0.942	113.321	1116	0.952	143.175	906	0.942	118.729
ENSRNOG00000015385	Pink1	804	476	0.9664	165.663	756	0.9963	240.369	585	0.9925	197.827	812	0.9888	248.598	627	0.9988	217.758	703	0.9938	220.914	689	0.995	213.312	704	0.9913	225.999	874	0.9963	283.686	575	0.99	189.942	754	0.9826	263.369	578	0.99	206.228
ENSRNOG00000017466	Kif5b	2892	475	0.9471	45.959	788	0.9986	69.653	556	0.9796	52.2713	792	0.999	67.4101	712	0.9862	68.7454	577	0.9986	50.4082	759	0.999	65.3275	857	0.9948	76.4844	625	0.9955	56.3981	818	0.9948	75.1215	851	0.9872	82.6381	592	0.9914	58.7218
ENSRNOG00000006336	Fyco1	7743	473	0.7903	17.0933	626	0.8935	20.667	464	0.8268	16.2928	828	0.9265	26.322	593	0.8644	21.3849	510	0.8605	16.6412	687	0.8966	22.0851	717	0.9092	23.9001	565	0.8777	19.0424	617	0.9084	21.1634	646	0.9053	23.43	483	0.8459	17.8943
ENSRNOG00000023943	Gbp1	1779	472	0.991	74.2406	869	0.9837	124.869	346	0.973	52.8794	798	0.9831	110.414	839	0.9826	131.689	400	0.977	56.8077	713	0.9944	99.7622	973	0.9938	141.165	432	0.9792	63.371	653	0.9871	97.4869	1023	0.9871	161.491	341	0.9691	54.9863
ENSRNOG00000021201	Txnip	2830	470	0.9155	46.4715	1116	0.9806	100.807	517	0.9424	49.6696	878	0.9654	76.3671	874	0.959	86.2357	604	0.9654	53.923	745	0.9583	65.5273	1134	0.9852	103.423	682	0.9523	62.8899	726	0.9693	68.1333	972	0.9714	96.456	602	0.9456	61.0219
ENSRNOG00000008329	Ndufb11	849	470	0.7644	154.905	913	0.9128	274.9	1024	0.9682	327.928	787	0.8881	228.174	709	0.8363	233.185	1101	0.9411	327.645	726	0.9046	212.854	788	0.9293	239.557	1003	0.9682	308.302	682	0.9282	213.347	938	0.9529	310.273	938	0.8398	316.936
ENSRNOG00000028451	Cox7b	477	469	0.9497	275.125	1160	0.9623	621.658	1561	0.9916	889.756	1016	0.9706	524.292	918	0.9476	537.386	1891	0.9665	1001.61	1018	0.9748	531.229	1118	0.9518	604.942	1600	0.9979	875.356	1020	0.9811	567.925	1135	0.9539	668.231	1501	0.9769	902.689
ENSRNOG00000010881	Trak2	6012	467	0.8485	21.7357	564	0.9331	23.9813	475	0.9093	21.4813	866	0.9963	35.4566	583	0.9769	27.0777	595	0.9586	25.0047	697	0.9799	28.858	639	0.9579	27.4329	663	0.975	28.7791	681	0.9524	30.0841	662	0.9706	30.9235	559	0.9661	26.6728
ENSRNOG00000016630	Tln1	8647	466	0.733	15.0798	543	0.8417	16.0526	485	0.8288	15.2498	786	0.9285	22.3746	518	0.8226	16.7273	612	0.8663	17.8817	676	0.8973	19.4596	559	0.8716	16.6854	679	0.9075	20.4921	672	0.8798	20.6401	588	0.8845	19.0968	587	0.8663	19.4737
ENSRNOG00000049437	Gpc1	3493	465	0.8689	37.2503	775	0.9622	56.7173	674	0.9757	52.4624	911	0.9528	64.1975	654	0.9253	52.2807	698	0.9714	50.4871	722	0.9508	51.4506	714	0.9493	52.7582	722	0.9705	53.9413	733	0.9551	55.7332	835	0.9342	67.1332	681	0.9573	55.9274
ENSRNOG00000006178	Dync1h1	14163	461	0.6388	9.10796	683	0.7812	12.3276	470	0.671	9.02255	789	0.8277	13.7126	664	0.8035	13.0911	545	0.7278	9.7222	721	0.7919	12.6716	720	0.8111	13.121	703	0.8198	12.9534	690	0.7898	12.9391	813	0.8038	16.1207	658	0.7717	13.3274
ENSRNOG00000008141	Nppb	628	459	0.949	204.516	965	0.9761	392.808	813	0.9968	351.98	746	0.9761	292.4	784	0.9682	348.593	1005	0.9873	404.324	831	0.9745	329.377	818	0.9761	336.189	905	0.965	376.073	679	0.9729	287.157	948	0.9761	423.934	749	0.9729	342.136
ENSRNOG00000025691	Pla2g7	1758	458	0.9113	72.899	880	0.9852	127.961	594	0.9744	91.8658	890	0.9846	124.615	715	0.9852	113.566	685	0.9977	98.4453	778	0.9721	110.157	847	0.9608	124.353	666	0.9869	98.864	803	0.9727	121.313	884	0.9886	141.216	650	0.9767	106.065
ENSRNOG00000019742	Stat3	4428	458	0.8979	28.9423	609	0.9817	35.1578	473	0.9393	29.0429	897	0.9801	49.8635	557	0.9754	35.1245	644	0.9774	36.7453	743	0.9853	41.767	648	0.9731	37.7709	694	0.9819	40.9011	707	0.9871	42.4054	666	0.9855	42.2392	594	0.9855	38.4817
ENSRNOG00000026119	Ywhah	1711	458	0.917	74.9015	474	0.9299	70.8175	365	0.934	58.0002	438	0.9258	63.0119	409	0.9094	66.7476	425	0.9305	62.757	453	0.931	65.9023	454	0.9486	68.4851	412	0.931	62.8391	50	0.6575	7.7612	50	0.6523	8.20671	50	0.6867	8.38293
ENSRNOG00000012609	Trdn	1045	457	0.9273	122.37	627	0.956	153.378	485	0.978	126.186	571	0.9684	134.499	552	0.9761	147.498	478	0.9502	115.567	548	0.977	130.532	657	0.9732	162.27	469	0.934	117.122	646	0.9818	164.182	682	0.978	183.281	478	0.9646	131.216
ENSRNOG00000008659	Arhgap21	6574	457	0.7928	19.4519	374	0.8363	14.543	247	0.733	10.2154	546	0.9381	20.4438	436	0.8601	18.5191	333	0.8403	12.7979	467	0.8972	17.6823	466	0.9315	18.2956	344	0.8532	13.6556	478	0.8832	19.3111	413	0.8322	17.6429	353	0.873	15.4036
ENSRNOG00000019629	Lamp1	2005	456	0.9501	63.6393	819	0.991	104.42	688	0.9686	93.2955	819	0.9726	100.547	670	0.9711	93.3088	739	0.996	93.1223	740	0.9815	91.8691	765	0.9965	98.4776	764	0.9766	99.4402	714	0.9945	94.5786	808	0.9686	113.174	726	0.9711	103.872
ENSRNOG00000003300	Btg2	2519	455	0.9496	50.5427	740	0.9805	75.0958	518	0.9829	55.9098	125	0.8511	12.2146	125	0.8515	13.8562	125	0.8253	12.5373	767	0.9948	75.7913	570	0.9897	58.4032	516	0.9925	53.457	653	0.9944	68.8484	671	0.9944	74.8072	560	0.996	63.7729
ENSRNOG00000002251	Sec31a	4423	454	0.7208	28.722	435	0.8004	25.1411	309	0.7131	18.9945	544	0.8569	30.2747	359	0.8363	22.6642	411	0.8151	23.4773	443	0.8587	24.931	507	0.8309	29.5857	393	0.8128	23.1878	416	0.8071	24.9796	408	0.7954	25.9055	332	0.7488	21.5326
ENSRNOG00000012550	Uqcrh	520	453	0.975	243.764	1026	0.9904	504.378	1221	0.9942	638.409	849	0.9846	401.886	799	0.9904	429.048	1372	0.9904	666.614	899	0.9904	430.337	890	0.9846	441.75	1185	0.9904	594.7	762	0.9904	389.189	1089	0.9846	588.131	1058	0.9846	583.658
ENSRNOG00000019490	Slc20a2	3620	451	0.8945	34.8613	555	0.9859	39.1919	365	0.9254	27.4139	718	0.9878	48.8218	515	0.9812	39.7247	480	0.9834	33.5009	640	0.9831	44.0072	608	0.9961	43.3496	475	0.9793	34.2427	607	0.979	44.5337	506	0.9616	39.2547	437	0.971	34.6297
ENSRNOG00000025443	Map1lc3a	969	450	0.9835	129.946	1005	0.9917	265.127	1100	0.967	308.642	813	0.9711	206.521	721	0.9794	207.766	1183	0.968	308.45	764	0.9794	196.255	818	0.9618	217.881	1145	0.9845	308.365	675	0.9288	185.007	993	0.9732	287.789	955	0.9721	282.719
ENSRNOG00000028945	Tmem182	2708	445	0.863	45.9819	686	0.9671	64.7571	562	0.9845	56.4253	848	0.9826	77.0807	599	0.9867	61.7647	610	0.9734	56.9121	693	0.9546	63.6996	661	0.9823	63.0004	584	0.9716	56.2791	671	0.9856	65.8086	646	0.979	66.9936	588	0.9538	62.288
ENSRNOG00000002877	Huwe1	13572	445	0.5126	9.17469	426	0.6165	8.02376	326	0.5104	6.53071	564	0.6881	10.229	481	0.6334	9.89608	398	0.5808	7.40905	491	0.6376	9.00513	513	0.6911	9.75582	420	0.6464	8.07585	477	0.683	9.33434	482	0.6838	9.97361	445	0.6536	9.40572
ENSRNOG00000017905	Map1lc3b	1743	444	0.8514	71.2789	507	0.8789	74.3571	437	0.8755	68.1664	520	0.8812	73.4352	433	0.8738	69.3669	493	0.8801	71.4616	476	0.8818	67.977	457	0.8715	67.672	477	0.8692	71.4174	437	0.8761	66.5875	503	0.8778	81.0438	376	0.8824	61.8823
ENSRNOG00000013505	Vdac2	1700	443	0.8953	72.9172	790	0.9706	118.793	712	0.9629	113.872	795	0.9788	115.111	650	0.9565	106.764	741	0.9765	110.127	728	0.9735	106.594	737	0.97	111.895	803	0.9694	123.268	706	0.9688	110.297	886	0.9524	146.364	708	0.9588	119.47
ENSRNOG00000019504	Grtp1	6706	443	0.6211	18.4848	573	0.6943	21.8425	374	0.5449	15.1633	672	0.7244	24.6663	489	0.6385	20.3614	443	0.5896	16.6903	596	0.6949	22.1225	580	0.7115	22.3231	511	0.636	19.8857	526	0.6812	20.832	593	0.6757	24.8336	395	0.5944	16.897
ENSRNOG00000010103	Eif4b	3657	443	0.9243	33.8964	765	0.9962	53.4747	631	0.9787	46.9128	831	0.9951	55.9338	682	0.9841	52.0741	839	0.997	57.9643	725	0.9978	49.3475	797	0.9932	56.2501	797	0.9874	56.8743	702	0.9959	50.9825	832	0.9959	63.8922	632	0.9888	49.5756
ENSRNOG00000002393	Eprs	4461	440	0.8951	27.5991	765	0.9433	43.8371	559	0.9507	34.0695	847	0.9579	46.7358	748	0.9599	46.82	616	0.9509	34.8877	768	0.9623	42.853	842	0.9621	48.7158	585	0.954	34.2221	751	0.9489	44.7112	944	0.974	59.4277	533	0.9489	34.2745
ENSRNOG00000003520	Prdx2	928	440	0.9828	132.672	829	0.9752	228.359	895	0.9925	262.217	817	0.9849	216.707	666	0.9828	200.396	881	0.9957	239.856	167	0.9795	44.7941	167	0.945	46.4471	167	0.9483	46.9625	693	0.9817	198.333	865	0.9925	261.768	795	0.9828	245.751
ENSRNOG00000011358	Hipk3	4120	439	0.8633	29.8155	439	0.9238	27.2383	288	0.8917	19.0056	688	0.9456	41.1045	446	0.9097	30.2273	320	0.8748	19.6235	491	0.8682	29.6645	517	0.9131	32.388	378	0.89	23.9429	504	0.8854	32.4894	483	0.9073	32.923	321	0.8789	22.3503
ENSRNOG00000017941	OPTN	4072	437	0.8684	30.0296	496	0.961	31.1377	383	0.9396	25.5728	697	0.9644	42.1331	510	0.9511	34.9723	476	0.9688	29.534	581	0.9501	35.5157	576	0.9536	36.5094	488	0.956	31.2748	566	0.9509	36.9163	620	0.9735	42.7596	440	0.9548	30.9971
ENSRNOG00000016596	Hspa4	4520	437	0.7923	27.0532	1011	0.9704	57.1775	693	0.9372	41.6851	1007	0.9544	54.839	915	0.9542	56.5255	910	0.9841	50.8659	881	0.9378	48.5165	1038	0.9496	59.2719	894	0.9575	51.6157	895	0.9588	52.5888	1044	0.975	64.8651	778	0.9394	49.3761
ENSRNOG00000009761	Tmod1	2538	437	0.7904	48.1798	547	0.8172	55.0945	418	0.8117	44.7787	698	0.8101	67.6958	503	0.8113	55.3399	521	0.8117	51.8644	555	0.8148	54.4319	562	0.8207	57.1525	509	0.8184	52.337	568	0.8176	59.4382	557	0.8191	61.6329	435	0.8109	49.167
ENSRNOG00000002271	Slain2	4791	435	0.7896	25.4061	623	0.9614	33.241	483	0.9614	27.4099	761	0.9583	39.0982	567	0.9532	33.046	584	0.9637	30.7971	599	0.9509	31.121	668	0.9482	35.9866	554	0.9714	30.1763	644	0.9633	35.7	665	0.9589	38.9803	521	0.9524	31.1952
ENSRNOG00000009592	Cyb5r3	1909	435	0.9324	63.7615	502	0.9811	67.2218	419	0.9822	59.6753	462	0.978	59.5709	440	0.9806	64.3589	462	0.9963	61.1448	431	0.9984	56.1983	482	0.9733	65.1675	456	0.9743	62.3364	30	0.527	4.17373	30	0.4741	4.41331	30	0.4725	4.50808
ENSRNOG00000004500	Myc	2339	432	0.8384	51.6807	362	0.841	39.5631	253	0.8589	29.4088	48	0.5712	5.05137	48	0.5528	5.73024	48	0.4994	5.18483	387	0.8457	41.1844	337	0.8816	37.1869	305	0.8897	34.0293	363	0.8427	41.2179	337	0.8435	40.4621	278	0.8948	34.095
ENSRNOG00000009378	Rpl4	1399	432	0.7834	86.4055	1047	0.822	191.312	1010	0.8292	196.286	931	0.827	163.806	832	0.822	166.061	1214	0.8292	219.242	867	0.8234	154.26	1004	0.8292	185.228	1123	0.8192	209.481	919	0.8277	174.464	1062	0.817	213.185	977	0.8284	200.333
ENSRNOG00000032902	Ybx1	1499	431	0.3943	80.4546	791	0.4016	134.892	802	0.3936	145.465	796	0.3956	130.71	687	0.4263	127.973	951	0.4123	160.288	704	0.4149	116.902	712	0.4063	122.594	943	0.4063	164.17	701	0.4016	124.201	772	0.435	144.632	732	0.4069	140.083
ENSRNOG00000021259	Prnp	2142	430	0.9533	56.1726	795	0.9888	94.8768	556	0.979	70.5735	731	0.9874	84.0033	657	0.9846	85.6462	658	0.993	77.6122	664	0.9865	77.1615	678	0.9827	81.6959	619	0.9809	75.4144	533	0.9823	66.0871	729	0.9874	95.5779	536	0.9813	71.783
ENSRNOG00000004322	Sh3kbp1	3419	428	0.5145	35.0284	626	0.5154	46.8045	536	0.5303	42.6238	567	0.5279	40.8209	512	0.5279	41.8151	601	0.5148	44.4118	523	0.573	38.0763	548	0.5323	41.3687	552	0.5426	42.1331	511	0.5139	39.6945	552	0.4999	45.3408	501	0.4996	42.0353
ENSRNOG00000018309	Chd4	6250	426	0.8026	19.0724	578	0.9742	23.6407	463	0.9106	20.1413	822	0.9808	32.3735	594	0.9614	26.538	558	0.9515	22.5568	622	0.9642	24.7721	658	0.9632	27.1729	594	0.9685	24.8022	651	0.9733	27.6637	718	0.9774	32.2622	476	0.9016	21.8476
ENSRNOG00000001815	Eif4a2	1879	423	0.9361	62.9925	1161	0.9888	157.949	887	0.9803	128.346	1176	0.991	154.056	940	0.9798	139.689	1243	0.9745	167.135	1063	0.9968	140.818	1159	0.9745	159.201	1037	0.9973	144.024	1039	0.9745	146.858	1202	0.9729	179.65	869	0.9659	132.669
ENSRNOG00000010237	Map7d1	3284	422	0.9178	35.9571	365	0.958	28.412	303	0.9309	25.0857	551	0.9979	41.2997	379	0.9546	32.2254	397	0.965	30.5429	465	0.9784	35.2454	474	0.9942	37.2534	452	0.993	35.9185	414	0.9604	33.4816	413	0.9467	35.318	344	0.9421	30.0491
ENSRNOG00000012457	CYC1	1023	422	0.9892	115.428	1361	0.9951	340.091	1366	0.9941	363.046	1252	0.9951	301.25	1120	0.9922	305.706	1523	0.9961	376.138	1059	0.9951	257.675	1216	0.9912	306.795	1420	0.9941	362.239	1079	0.9951	280.127	1205	0.9873	330.796	1320	0.9883	370.147
ENSRNOG00000022980	Sdhd	1220	422	0.9689	96.7894	909	0.9697	190.465	775	0.9869	172.714	824	0.9672	166.251	714	0.9869	163.418	903	0.9705	187.004	752	0.973	153.43	789	0.9713	166.92	875	0.9787	187.168	660	0.9852	143.679	844	0.9689	194.282	794	0.9861	186.697
ENSRNOG00000047768	Lamb2	5581	422	0.8326	21.1581	795	0.9778	36.4139	550	0.8762	26.794	1023	0.9812	45.1192	769	0.9405	38.4748	734	0.9685	33.2283	835	0.9763	37.2415	918	0.9873	42.4542	801	0.9944	37.4545	740	0.9699	35.2151	977	0.9776	49.1623	715	0.9649	36.7511
ENSRNOG00000016470	Ndufa10	1984	419	0.753	59.0946	736	0.812	94.8306	652	0.8075	89.3496	731	0.8059	90.693	617	0.816	86.8372	710	0.815	90.4149	651	0.81	81.6755	743	0.815	96.6579	750	0.8155	98.6513	668	0.7959	89.4219	750	0.8034	106.162	655	0.8165	94.7056
ENSRNOG00000003343	Canx	4986	417	0.7246	23.4023	1249	0.9083	64.0357	924	0.9051	50.3856	1147	0.8793	56.6251	1148	0.8937	64.2912	1131	0.8746	57.3104	1009	0.8742	50.3722	1255	0.8734	64.9653	1064	0.8516	55.6894	91	0.517	4.84728	91	0.4747	5.12553	91	0.5197	5.23558
ENSRNOG00000040108	Cd36	2433	415	0.3892	47.7289	720	0.4723	75.6489	504	0.4723	56.3216	517	0.4768	52.3054	463	0.4743	53.1375	495	0.4628	51.4028	593	0.4727	60.6687	722	0.4751	76.5923	599	0.471	64.2492	524	0.4727	57.2003	644	0.4714	74.3349	533	0.4727	62.8436
ENSRNOG00000020206	Ctsd	1989	415	0.9759	58.3833	727	0.9849	93.4355	651	0.9804	88.9883	694	0.996	85.8861	589	0.9899	82.688	724	0.9869	91.966	655	0.9854	81.9707	664	0.9844	86.1635	686	0.9809	90.0062	579	0.9849	77.313	802	0.9884	113.237	637	0.9904	91.8715
ENSRNOG00000020308	Ech1	1117	413	0.9776	103.46	1302	0.9973	297.968	1163	0.9946	283.083	1157	0.9964	254.964	954	0.9973	238.483	1197	0.9937	270.747	1054	0.9803	234.877	1084	0.9955	250.476	1277	0.9937	298.346	951	0.9946	226.119	1173	0.9821	294.913	1051	0.9964	269.914
ENSRNOG00000011901	Rrad	1426	413	0.9993	81.0412	867	0.9951	155.422	525	0.9741	100.098	849	0.9979	146.55	598	0.9944	117.096	642	0.9881	113.747	706	0.9881	123.236	718	0.9944	129.956	647	0.9853	118.404	792	0.9881	147.508	874	0.9972	172.124	531	0.9881	106.82
ENSRNOG00000036689	P4hb	2466	413	0.9732	46.8632	908	0.9895	94.125	765	0.9959	84.3441	945	0.9947	94.3272	733	0.998	82.999	827	0.9959	84.7297	837	0.9996	84.486	830	0.9996	86.8711	864	0.9931	91.4331	811	0.998	87.3447	838	0.9988	95.4334	762	0.9911	88.6417
ENSRNOG00000032788	Dysf	6319	411	0.8087	18.1999	651	0.9394	26.3357	447	0.8655	19.2329	776	0.9601	30.2281	626	0.9223	27.6623	620	0.9226	24.7894	641	0.9058	25.25	773	0.9759	31.5734	721	0.9649	29.7762	581	0.9206	24.4195	805	0.9497	35.7764	585	0.9107	26.5573
ENSRNOG00000001136	Pebp1	1034	410	0.9903	110.953	871	0.9961	215.333	882	0.9758	231.918	775	0.9923	184.493	753	0.9845	203.346	949	0.9865	231.883	711	0.9923	171.16	764	0.9874	190.705	926	0.9961	233.708	673	0.9923	172.864	798	0.9884	216.736	796	0.9865	220.835
ENSRNOG00000018823	NISCH	5107	409	0.8265	22.4095	513	0.9416	25.6781	417	0.9348	22.2002	641	0.974	30.8952	497	0.9097	27.1739	482	0.9463	23.8454	529	0.9507	25.7835	552	0.9638	27.8974	513	0.9638	26.2141	490	0.9076	25.4823	549	0.9526	30.1895	512	0.9546	28.7594
ENSRNOG00000006305	Slc38a2	4612	408	0.8682	24.754	822	0.987	45.5611	517	0.9529	30.4781	945	0.9803	50.436	709	0.9506	42.9259	632	0.9733	34.6219	866	0.9748	46.7392	801	0.9627	44.8264	594	0.9796	33.6109	882	0.9755	50.7912	722	0.9794	43.964	558	0.9477	34.7073
ENSRNOG00000018018	Kcnip2	2343	407	0.6317	48.6068	929	0.6637	101.357	810	0.6598	93.9938	972	0.6628	102.116	796	0.6662	94.8643	979	0.6658	105.568	877	0.6581	93.1707	901	0.6654	99.2528	989	0.6671	110.156	785	0.6645	88.9829	947	0.6637	113.508	918	0.6658	112.395
ENSRNOG00000010277	Idh3a	2201	406	0.9182	51.6156	635	0.9918	73.7506	552	0.9905	68.1876	112	0.8278	12.5255	112	0.8655	14.2089	112	0.8614	12.8565	609	0.9977	68.8731	704	0.99	82.5549	598	0.9882	70.9029	627	0.9945	75.6583	629	0.9977	80.2564	574	0.9959	74.8114
ENSRNOG00000025076	AI314180	5517	405	0.851	20.5413	642	0.9587	29.7471	438	0.9128	21.5853	818	0.9862	36.4963	601	0.9797	30.4182	613	0.9663	28.0725	667	0.9755	30.0937	708	0.986	33.1223	633	0.9567	29.9422	650	0.9862	31.291	726	0.9688	36.9558	546	0.9367	28.39
ENSRNOG00000000383	Mypn	4918	405	0.8512	23.0431	461	0.927	23.9621	283	0.8743	15.6453	586	0.9845	29.3297	402	0.9388	22.8244	336	0.8487	17.2613	451	0.9136	22.8265	494	0.9461	25.9256	413	0.9561	21.9152	497	0.9575	26.8396	424	0.9319	24.2118	360	0.8837	20.9986
ENSRNOG00000001177	Acads	1767	404	0.8987	63.9764	669	0.9904	96.7836	556	0.9938	85.5509	628	0.9972	87.4825	547	0.9581	86.4396	588	0.9938	84.0745	587	0.9864	82.6901	598	0.9774	87.3484	606	0.9825	89.4992	549	0.9825	82.5172	752	0.9859	119.517	483	0.9864	78.4127
ENSRNOG00000019094	Gstm2	1071	404	0.9188	105.552	743	0.9627	177.342	567	0.972	143.94	666	0.9701	153.067	599	0.9664	156.171	599	0.9645	141.306	609	0.9711	141.54	689	0.9673	166.043	624	0.9701	152.047	539	0.9701	133.662	700	0.9617	183.551	517	0.9692	138.477
ENSRNOG00000005257	Prkaca	2220	403	0.8937	50.7957	444	0.9631	51.126	382	0.9486	46.784	488	0.9356	54.1084	424	0.9441	53.3304	475	0.9432	54.0585	373	0.9703	41.8223	403	0.9721	46.8535	455	0.9748	53.4862	397	0.9306	47.4948	475	0.964	60.0883	458	0.9514	59.1818
ENSRNOG00000004726	Mapkapk2	2361	402	0.9072	47.6437	793	0.9568	85.8597	684	0.9822	78.7674	877	0.9661	91.4328	618	0.9576	73.0894	827	0.9818	88.4979	719	0.9653	75.8028	710	0.9708	77.6162	787	0.9598	86.9885	63	0.6726	7.08685	63	0.7073	7.49366	63	0.6857	7.65457
ENSRNOG00000016589	Mlf2	1381	401	0.9073	81.2505	329	0.9776	60.8996	279	0.9949	54.9284	306	0.9964	54.5414	263	0.958	53.177	329	0.9797	60.1902	328	0.9754	59.1197	291	0.9935	54.3863	329	0.9689	62.1706	276	0.9725	53.0792	312	0.9739	63.4469	315	0.9841	65.4324
ENSRNOG00000008942	BC027072	3792	400	0.8739	29.5166	337	0.9117	22.7182	218	0.8428	15.6306	547	0.9742	35.5073	262	0.8921	19.2928	290	0.8972	19.322	383	0.9111	25.141	348	0.9388	23.6865	338	0.9314	23.2612	345	0.9349	24.1635	357	0.9504	26.4393	284	0.9296	21.4845
ENSRNOG00000014568	Ndufb10	683	399	0.9868	163.466	619	0.9268	231.677	674	0.9824	268.303	553	0.9898	199.298	491	0.9224	200.735	710	0.9883	262.64	485	0.9839	176.756	551	0.9341	208.219	733	0.9883	280.07	523	0.978	203.371	584	0.9297	240.127	582	0.9883	244.443
ENSRNOG00000015233	Etfa	1307	397	0.9082	84.9944	1084	0.9954	212.015	933	0.9839	194.085	1070	0.9954	201.515	904	0.9885	193.132	1052	0.9969	203.359	917	0.9923	174.641	1018	0.9939	201.031	999	0.9946	199.468	898	0.9908	182.478	1052	0.9946	226.042	952	0.9832	208.948
ENSRNOG00000016137	Rad23b	2759	397	0.8195	40.2637	565	0.9616	52.3491	390	0.9478	38.4326	596	0.9315	53.1732	457	0.9612	46.2516	501	0.9503	45.8785	553	0.9319	49.8914	542	0.9848	50.7035	463	0.9532	43.7938	516	0.9532	49.6715	582	0.9685	59.2407	422	0.954	43.877
ENSRNOG00000017730	Psmd1	3065	396	0.9038	36.1526	709	0.9866	59.1327	506	0.9742	44.8855	771	0.9935	61.9187	663	0.9909	60.4011	652	0.9834	53.7453	707	0.9824	57.4171	720	0.9866	60.6307	648	0.9762	55.1731	703	0.9918	60.9163	781	0.983	71.5599	569	0.9775	53.2547
ENSRNOG00000009754	Nampt	2562	396	0.8704	43.2505	889	0.9965	88.7023	609	0.9828	64.6286	1194	0.9961	114.716	797	0.9973	86.8643	770	0.9828	75.9338	941	0.9957	91.4245	896	0.9961	90.265	757	0.9977	77.1081	60	0.6729	6.21987	60	0.6495	6.5769	60	0.6608	6.71813
ENSRNOG00000009702	Lmo7	5190	396	0.8432	21.3503	578	0.9146	28.469	305	0.8154	15.9779	656	0.9073	31.1125	574	0.9077	30.8821	434	0.8846	21.1274	566	0.8921	27.1457	644	0.9287	32.0264	448	0.895	22.5265	606	0.9345	31.0109	663	0.9127	35.8753	437	0.8592	24.1541
ENSRNOG00000024568	Ndufs7	722	395	0.9972	153.086	556	0.9958	196.856	525	0.9917	197.701	471	0.9917	160.576	407	0.9945	157.405	616	0.9958	215.559	499	0.9931	172.035	470	0.9917	168.016	549	0.9931	198.435	440	0.9958	161.854	585	0.9958	227.545	529	0.9972	210.181
ENSRNOG00000005587	Suclg1	1244	393	0.9703	88.399	1172	0.9839	240.835	950	0.9767	207.63	1071	0.9759	211.918	914	0.9767	205.158	1134	0.9823	230.312	210	0.9654	42.0195	210	0.9791	43.5702	210	0.959	44.0537	902	0.9783	192.573	1042	0.9815	235.232	877	0.9879	202.234
ENSRNOG00000017506	Cltb	1072	393	0.8657	102.582	704	0.903	167.877	686	0.8946	173.987	712	0.9039	163.487	534	0.9291	139.094	715	0.8946	168.513	627	0.9282	145.588	552	0.8825	132.903	768	0.9338	186.96	605	0.9021	149.889	759	0.9123	198.837	620	0.9076	165.91
ENSRNOG00000042233	Rpl41	357	392	0.9944	307.251	1040	0.9916	744.693	1673	0.9972	1274.13	965	0.9888	665.361	794	0.9888	621.033	1941	0.9944	1373.66	907	0.9944	632.399	874	0.9944	631.878	1673	0.9944	1222.96	847	0.986	630.121	1200	0.9944	943.979	1298	0.9944	1043
ENSRNOG00000019048	Sod2	2063	392	0.922	53.1694	1069	0.9995	132.462	810	0.9884	106.751	1137	0.9796	135.662	895	0.9971	121.14	1115	0.983	136.552	910	0.9869	109.798	1040	0.9719	130.114	1085	0.9699	137.25	52	0.6331	6.69442	52	0.6108	7.0787	52	0.6035	7.2307
ENSRNOG00000049541	Alas1	1827	391	0.9655	59.8844	458	0.9721	64.0824	338	0.9683	50.2996	547	0.9732	73.6965	356	0.9787	54.4093	448	0.9759	61.9531	446	0.9661	60.7643	419	0.983	59.1924	384	0.9726	54.8499	467	0.9814	67.8871	503	0.9945	77.3177	371	0.9595	58.2521
ENSRNOG00000017854	Ucp2	1600	391	0.9719	68.3805	464	0.9831	74.1328	358	0.9437	60.8344	463	0.9881	71.2294	360	0.9888	62.8268	363	0.9644	57.3205	448	0.9775	69.6964	459	0.9838	74.0428	386	0.9888	62.9579	379	0.9881	62.9112	432	0.9881	75.8251	360	0.9856	64.5444
ENSRNOG00000016023	Kank1	5171	391	0.8675	21.1581	578	0.96	28.5736	385	0.9145	20.2429	815	0.9652	38.7955	615	0.9538	33.2095	548	0.9234	26.775	653	0.9462	31.4334	688	0.9524	34.3403	588	0.9302	29.6747	648	0.9584	33.282	749	0.9729	40.6777	496	0.9346	27.5159
ENSRNOG00000007133	Plxnb2	6370	391	0.7694	17.1756	492	0.8758	19.7441	434	0.8485	18.5241	709	0.9485	27.3971	489	0.8732	21.4354	501	0.889	19.8711	549	0.9046	21.4529	594	0.9185	24.0678	557	0.9053	22.8191	576	0.9278	24.0155	584	0.886	25.7468	544	0.9264	24.4983
ENSRNOG00000032701	Slc6a8	3916	391	0.8034	27.9389	388	0.8971	25.328	291	0.8159	20.204	578	0.9471	36.3315	369	0.8519	26.3115	354	0.8986	22.8394	445	0.907	28.2859	445	0.9114	29.3297	351	0.915	23.3909	486	0.9076	32.9612	447	0.9229	32.0564	335	0.9252	24.5402
ENSRNOG00000030688	Lrrc2	2503	390	0.9421	43.5992	553	0.9876	56.4776	448	0.9864	48.6635	671	0.9704	65.9872	466	0.9804	51.9861	560	0.992	56.5263	599	0.9764	59.5687	550	0.9956	56.7142	530	0.9876	55.2584	600	0.9812	63.6648	559	0.9904	62.7192	466	0.982	53.4074
ENSRNOG00000002989	Nmt1	2202	390	0.8111	49.559	474	0.8302	55.0267	423	0.8197	52.2287	512	0.8252	57.2336	410	0.8447	51.9911	441	0.8538	50.5993	423	0.8529	47.8162	447	0.8197	52.3939	420	0.8288	49.7754	447	0.8229	53.9137	516	0.8351	65.8084	416	0.8224	54.1941
ENSRNOG00000007801	R3hdm2	3746	389	0.8265	29.0574	373	0.968	25.4538	297	0.8911	21.5563	468	0.9706	30.7522	363	0.9554	27.0583	320	0.9541	21.5827	414	0.9754	27.5096	414	0.9784	28.5248	403	0.9717	28.075	377	0.956	26.729	420	0.9693	31.487	338	0.9362	25.8836
ENSRNOG00000006865	Laptm4a	1695	389	0.7298	64.2178	712	0.7917	107.38	745	0.7758	119.501	642	0.7611	93.2317	536	0.7676	88.2993	786	0.7634	117.159	559	0.7634	82.0908	632	0.764	96.236	709	0.7481	109.159	513	0.7546	80.3816	758	0.7735	125.588	660	0.7534	111.699
ENSRNOG00000017990	Ubap2l	4088	388	0.7962	26.558	315	0.8549	19.6975	247	0.8378	16.4275	456	0.8867	27.4569	299	0.8337	20.4231	295	0.8559	18.232	337	0.8885	20.5197	349	0.8461	22.0346	314	0.8346	20.0448	344	0.8799	22.3489	323	0.9012	22.1892	285	0.8107	19.9991
ENSRNOG00000043201	Adck3	2490	385	0.9586	43.265	807	0.9867	82.8488	655	0.9964	71.5202	933	0.9839	92.2318	681	0.9823	76.3677	710	0.9859	72.0414	751	0.9896	75.0746	806	0.9908	83.5461	787	0.9876	82.4818	743	0.9851	79.2498	883	0.9952	99.5888	683	0.9831	78.686
ENSRNOG00000003653	Fh	1585	385	0.9672	67.9683	696	0.9691	112.251	610	0.9685	104.637	111	0.8744	17.2382	111	0.8896	19.5549	111	0.8915	17.6936	641	0.9703	100.666	688	0.9697	112.034	656	0.9703	108.008	649	0.9716	108.749	729	0.9773	129.166	643	0.9773	116.374
ENSRNOG00000002208	Shroom3	6781	385	0.7695	15.887	454	0.881	17.1149	274	0.7363	10.9861	587	0.8988	21.308	451	0.8707	18.5714	386	0.826	14.3819	453	0.8742	16.6286	581	0.8839	22.1143	444	0.868	17.0873	448	0.8665	17.5466	567	0.8708	23.4822	366	0.8164	15.4833
ENSRNOG00000017940	Rere	7664	384	0.6289	14.0201	315	0.7638	10.5067	220	0.6292	7.80465	470	0.7654	15.0953	295	0.7319	10.748	263	0.6584	8.67009	396	0.7858	12.8615	385	0.7573	12.9657	322	0.7623	10.9644	390	0.7557	13.5151	402	0.7863	14.7306	299	0.7015	11.1916
ENSRNOG00000002680	Lamc1	7636	384	0.687	14.0715	393	0.8756	13.1565	333	0.7826	11.8567	598	0.8882	19.2767	391	0.8575	14.2979	467	0.8753	15.4516	532	0.91	17.342	421	0.8465	14.2301	491	0.8971	16.7803	475	0.8638	16.521	475	0.8821	17.4694	457	0.8916	17.1683
ENSRNOG00000008755	Acox1	3739	383	0.8796	28.6628	851	0.9885	58.1817	610	0.9698	44.3569	854	0.9901	56.2213	763	0.9676	56.9811	694	0.9631	46.8951	677	0.9832	45.0698	886	0.9861	61.1601	757	0.9829	52.8352	663	0.9786	47.0942	827	0.9979	62.1154	657	0.9853	50.4064
ENSRNOG00000019262	Trak1	4788	382	0.5579	22.3246	379	0.6165	20.2347	310	0.6226	17.6033	547	0.6523	28.121	369	0.5729	21.5196	377	0.5643	19.8935	405	0.5883	21.0549	434	0.5954	23.3952	433	0.6581	23.6003	419	0.6675	23.2418	445	0.6596	26.1009	363	0.6036	21.7485
ENSRNOG00000032917	Zfand2a	3194	382	0.9327	33.466	881	0.9765	70.5104	901	0.9693	76.6966	753	0.9709	58.0308	695	0.9659	60.7592	914	0.9768	72.2994	830	0.9878	64.6838	680	0.9793	54.9496	909	0.9724	74.2698	683	0.9599	56.793	783	0.9712	68.8456	959	0.984	86.131
ENSRNOG00000015277	Serf2	498	382	0.9558	214.639	943	0.99	484.055	1039	0.988	567.248	755	0.9659	373.178	717	0.9839	402.024	1078	0.992	546.906	682	0.9839	340.884	743	0.9859	385.079	1056	0.9799	553.373	701	0.9819	373.85	993	0.9839	559.976	901	0.992	519.005
ENSRNOG00000048174	Uqcrq	400	381	0.97	266.526	1301	0.9725	831.437	1635	0.975	1111.33	961	0.985	591.373	1012	0.9775	706.452	1728	0.975	1091.46	946	0.985	588.686	1078	0.97	695.583	1497	0.97	976.663	910	0.9675	604.213	1220	0.975	856.543	1284	0.9775	920.833
ENSRNOG00000030118	Msn	3612	379	0.8688	29.3607	547	0.9781	38.7125	505	0.9311	38.0128	612	0.9862	41.7063	534	0.977	41.2815	753	0.9889	52.6709	565	0.9684	38.9361	612	0.9729	43.7315	647	0.9862	46.7455	546	0.9809	40.1471	503	0.9898	39.1083	530	0.9756	42.0924
ENSRNOG00000019277	Vdac3	1357	378	0.9853	77.9448	1089	0.9801	205.145	1000	0.9948	200.358	1026	0.9779	186.108	993	0.9934	204.33	1097	0.9904	204.244	996	0.9948	182.697	1034	0.9897	196.667	988	0.9919	190.003	957	0.9772	187.301	1057	0.9971	218.748	962	0.9831	203.363
ENSRNOG00000030591	Arf1	1756	378	0.9237	60.2341	699	0.9903	101.757	640	0.9903	99.0928	670	0.9806	93.9179	573	0.9755	91.1155	675	0.9835	97.1187	614	0.9749	87.0354	649	0.9704	95.3917	672	0.9749	99.8683	589	0.9738	89.084	646	0.9778	103.314	621	0.9892	101.448
ENSRNOG00000006646	Vopp1	2883	378	0.931	36.6879	663	0.9705	58.787	583	0.9726	54.9807	931	0.9879	79.4883	713	0.9684	69.0569	761	0.9844	66.6904	716	0.975	61.8188	802	0.9806	71.7993	704	0.9709	63.7252	787	0.9719	72.5002	738	0.9702	71.8888	678	0.9938	67.4623
ENSRNOG00000018237	Gstp1	769	377	0.9792	137.18	906	0.9818	301.172	976	0.9935	345.072	734	0.9805	234.946	685	0.9818	248.729	1094	0.9831	359.43	663	0.9831	214.605	740	0.9818	248.368	907	0.9818	307.797	643	0.9831	222.072	935	0.9818	341.456	980	0.9831	365.574
ENSRNOG00000019164	Uba1	3547	376	0.8971	29.6621	480	0.9368	34.5933	438	0.9566	33.5737	565	0.923	39.209	468	0.949	36.8423	406	0.9394	28.9193	482	0.958	33.825	503	0.9391	36.6013	492	0.9555	36.1982	483	0.9462	36.1655	541	0.9501	42.8337	425	0.9583	34.3719
ENSRNOG00000006609	Psme4	7301	375	0.7061	14.3722	694	0.9011	24.299	485	0.8347	18.0612	193	0.6395	6.50689	193	0.6103	7.38137	193	0.6272	6.6788	795	0.9226	27.1042	744	0.9152	26.3015	543	0.8602	19.4089	798	0.9143	29.0288	748	0.9045	28.7719	607	0.8748	23.8497
ENSRNOG00000013186	G3bp1	6549	374	0.638	15.9798	694	0.7743	27.0892	507	0.751	21.0484	692	0.7891	26.0093	624	0.8378	26.6055	695	0.7798	26.8122	567	0.761	21.5506	673	0.8177	26.5235	621	0.8186	24.7457	636	0.7784	25.7924	737	0.8285	31.604	570	0.7896	24.9675
ENSRNOG00000008830	NFE2L1	2250	374	0.9036	46.5119	479	0.9449	54.4208	342	0.9049	41.3266	703	0.94	76.9079	448	0.8809	55.5978	496	0.8893	55.6958	565	0.8911	62.5055	515	0.9067	59.0765	484	0.9578	56.1366	530	0.9311	62.5608	528	0.9489	65.9023	463	0.9191	59.0302
ENSRNOG00000048320	Ndufa11	510	373	0.9922	204.651	558	0.9843	279.69	643	0.9922	342.789	545	0.9922	263.042	428	0.9902	234.334	703	0.9902	348.264	510	0.9922	248.916	475	0.9902	240.389	663	0.9882	339.255	479	0.9961	249.445	584	0.9902	321.582	550	0.9882	309.363
ENSRNOG00000014097	Psmd7	1588	371	0.8885	65.373	533	0.9458	85.8003	429	0.9622	73.4503	80	0.8287	12.4005	80	0.7361	14.067	80	0.8243	12.7281	371	0.915	58.1535	355	0.9421	57.699	377	0.954	61.9546	437	0.8967	73.087	523	0.9496	92.4912	453	0.9345	81.8321
ENSRNOG00000019041	Psme1	998	371	0.8768	104.02	617	0.9539	158.04	610	0.9459	166.183	612	0.9669	150.945	523	0.9699	146.33	715	0.9579	181.008	516	0.9339	128.698	627	0.9419	162.154	663	0.9689	173.367	523	0.9589	139.181	686	0.9289	193.038	578	0.9429	166.14
ENSRNOG00000007316	Idh3B	1171	369	0.9863	88.1748	1025	0.9547	223.758	856	0.988	198.748	130	0.9283	27.3265	130	0.9266	30.9991	130	0.9137	28.0485	884	0.9735	187.909	952	0.9778	209.831	981	0.9906	218.623	780	0.9983	176.908	1018	0.9932	244.141	856	0.9898	209.697
ENSRNOG00000036688	Arhgdia	1823	369	0.9813	56.6389	548	0.9929	76.8433	473	0.9989	70.5441	640	0.9951	86.4155	460	0.9907	70.4585	563	0.9929	78.027	545	0.9989	74.4153	536	0.9945	75.8872	582	0.9945	83.3143	500	0.9967	72.8437	567	0.9945	87.3465	506	0.9835	79.6232
ENSRNOG00000046891	Hk1	3445	368	0.8215	29.8905	417	0.8865	30.9428	328	0.8618	25.8864	67	0.5451	4.78722	67	0.5251	5.4306	67	0.5138	4.9137	472	0.8929	34.104	437	0.8888	32.7403	443	0.8984	33.5581	398	0.881	30.6834	492	0.8987	40.1075	412	0.8842	34.3071
ENSRNOG00000042821	Cd59	1500	368	0.994	68.6486	830	0.9913	141.449	588	0.9953	106.579	880	0.9993	144.407	678	0.9873	126.212	668	0.9913	112.515	822	0.996	136.406	794	0.9947	136.622	638	0.9967	110.997	794	0.9953	140.585	852	0.9947	159.514	594	0.99	113.598
ENSRNOG00000010964	Akap13	12229	367	0.611	8.39751	476	0.7589	9.95012	355	0.6512	7.89267	689	0.8122	13.8684	480	0.7575	10.96	439	0.6967	9.06979	505	0.7597	10.279	478	0.7657	10.0885	435	0.7086	9.28285	539	0.7803	11.706	580	0.8186	13.3195	465	0.7485	10.9078
ENSRNOG00000027514	UBE2M	1087	366	0.8868	94.2165	450	0.9724	105.827	449	0.9807	112.306	425	0.9476	96.2404	345	0.9255	88.6241	466	0.9282	108.313	391	0.9163	89.5364	352	0.92	83.5802	512	0.9825	122.92	375	0.943	91.6243	434	0.9568	112.127	404	0.8951	106.617
ENSRNOG00000005269	Srl	5006	366	0.8142	20.4581	635	0.9177	32.4261	430	0.8965	23.3542	711	0.9509	34.9604	571	0.8835	31.8498	568	0.8901	28.6669	599	0.9093	29.7844	646	0.9245	33.3067	621	0.9305	32.3731	566	0.9187	30.0286	683	0.9403	38.3159	521	0.8927	29.8554
ENSRNOG00000009421	Ivd	2082	365	0.9717	49.0555	756	0.9971	92.8225	572	0.9957	74.6968	35	0.5283	4.13795	35	0.4774	4.69407	35	0.574	4.24728	640	0.9841	76.5159	692	0.9971	85.7858	650	0.9933	81.4734	182	0.9356	23.2167	182	0.8871	24.5493	182	0.9414	25.0765
ENSRNOG00000043098	Mt2A	382	365	0.7723	267.365	1894	0.801	1267.44	1262	0.7827	898.22	1545	0.7853	995.551	1414	0.7827	1033.59	1260	0.7801	833.356	1565	0.801	1019.77	1577	0.7984	1065.51	1208	0.7749	825.252	1470	0.7932	1022.03	1788	0.801	1314.48	1287	0.7749	966.476
ENSRNOG00000001966	Zbtb20	5874	363	0.7336	17.2921	448	0.848	19.4965	308	0.7935	14.2562	406	0.8778	17.0134	297	0.802	14.1184	236	0.6837	10.1508	350	0.8129	14.8315	315	0.8371	13.841	234	0.7567	10.396	403	0.8166	18.2213	389	0.8578	18.5979	269	0.7341	13.1369
ENSRNOG00000000130	Dnajb5	2533	361	0.8756	39.8793	373	0.8966	37.6431	235	0.8362	25.2243	414	0.9116	40.2312	291	0.891	32.0789	307	0.8839	30.6215	393	0.8895	38.6198	361	0.9226	36.7843	324	0.8788	33.3805	366	0.8752	38.3756	354	0.8922	39.248	267	0.8595	30.2379
ENSRNOG00000007905	Itga7	4003	361	0.8431	25.2346	697	0.9458	44.5102	572	0.9455	38.8505	854	0.9808	52.5134	620	0.976	43.2482	667	0.9623	42.0982	690	0.9455	42.9058	703	0.949	45.3273	685	0.9475	44.6568	661	0.9698	43.8556	780	0.969	54.7215	659	0.9375	47.2254
ENSRNOG00000046799	Phb	1741	360	0.8794	57.8601	558	0.9908	81.9309	504	0.9833	78.7079	519	0.9856	73.3782	415	0.9897	66.5597	645	0.9937	93.6018	431	0.9667	61.6213	453	0.9914	67.1568	594	0.9971	89.037	67	0.7392	10.2208	65	0.6766	10.4849	71	0.7053	11.6986
ENSRNOG00000013009	Ldha	1600	357	0.5325	62.4343	772	0.5544	123.342	708	0.5525	120.309	789	0.5531	121.382	613	0.5563	106.98	767	0.5531	121.115	735	0.5575	114.346	661	0.5563	106.628	709	0.5581	115.64	645	0.5619	107.065	778	0.555	136.555	698	0.5613	125.144
ENSRNOG00000002256	Art3	1504	357	0.9415	66.4195	578	0.9701	98.2409	517	0.9674	93.4607	704	0.9747	115.219	483	0.984	89.6729	576	0.9741	96.7605	549	0.9594	90.8608	558	0.9707	95.7583	480	0.9747	83.2868	576	0.9621	101.715	539	0.9721	100.645	507	0.9874	96.7021
ENSRNOG00000018761	Eif3c	3036	354	0.9433	32.627	631	0.9848	53.13	473	0.9951	42.359	663	0.9987	53.7539	565	0.9845	51.9647	580	0.9951	48.2669	609	0.9802	49.9307	565	0.9812	48.0327	539	0.9875	46.3308	569	0.9756	49.7759	665	0.9918	61.5133	517	0.9901	48.85
ENSRNOG00000032546	Dot1l	6015	354	0.7834	16.4681	300	0.8412	12.7496	257	0.8331	11.6167	455	0.8984	18.6198	375	0.8318	17.4084	290	0.8185	12.1811	393	0.8692	16.2633	378	0.865	16.2198	330	0.8509	14.3173	374	0.8728	16.5137	343	0.858	16.0143	266	0.8025	12.6859
ENSRNOG00000000147	Mast2	5399	353	0.7833	18.2952	413	0.8722	19.5546	279	0.7963	14.05	453	0.8616	20.653	406	0.8559	20.9978	350	0.8239	16.3787	424	0.8763	19.5481	460	0.8818	21.9905	372	0.8659	17.9809	443	0.8465	21.7921	468	0.8718	24.3434	339	0.8765	18.012
ENSRNOG00000022099	Trim72	2363	352	0.9716	41.6825	918	0.9924	99.3096	650	0.9911	74.7887	849	0.9996	88.4387	598	0.9911	70.6642	707	0.9975	75.5926	649	0.9962	68.3649	690	0.9992	75.366	717	0.9894	79.1842	643	0.9979	72.2697	858	0.9992	101.97	598	0.9979	72.5961
ENSRNOG00000005032	Ppp1r12b	8318	351	0.6239	11.8076	356	0.7801	10.9407	234	0.6732	7.64863	469	0.8412	13.8788	315	0.7543	10.5744	245	0.6943	7.44167	390	0.8238	11.6707	434	0.8553	13.4667	369	0.8446	11.5769	387	0.8149	12.3567	406	0.8109	13.7074	292	0.7444	10.0702
ENSRNOG00000008170	Jph2	4169	351	0.8283	23.5587	469	0.9491	28.7576	337	0.9292	21.9778	570	0.953	33.6543	372	0.8935	24.9157	392	0.9458	23.7562	441	0.9434	26.3305	483	0.9693	29.9024	441	0.9573	27.6051	447	0.946	28.4764	534	0.9571	35.9715	397	0.9252	27.3171
ENSRNOG00000005538	Psmd11	3344	350	0.7153	29.2871	504	0.7916	38.528	417	0.7333	33.9044	575	0.7548	42.3253	501	0.7497	41.8344	502	0.7542	37.9281	493	0.7527	36.6972	459	0.7605	35.4272	497	0.7623	38.7858	41	0.3633	3.25632	41	0.3944	3.44324	41	0.323	3.51717
ENSRNOG00000006197	Calu	3166	349	0.8623	30.8454	625	0.9608	50.464	456	0.97	39.1598	733	0.9646	56.989	612	0.9697	53.9762	574	0.9574	45.8062	645	0.9422	50.7109	682	0.9539	55.5986	549	0.9454	45.2527	596	0.9567	49.997	674	0.976	59.7858	535	0.9583	48.4751
ENSRNOG00000018129	Ndufab1	669	349	0.9297	145.974	833	0.9387	318.296	818	0.9477	332.44	675	0.9357	248.357	655	0.9283	273.387	922	0.9238	348.2	145	0.9402	53.9503	160	0.8954	61.7283	150	0.9178	58.5124	600	0.9253	238.196	842	0.9312	353.456	825	0.9283	353.756
ENSRNOG00000020460	Banf1	731	349	0.8249	133.593	292	0.8659	102.112	302	0.9302	112.325	310	0.8646	104.386	259	0.9384	98.9338	362	0.8865	125.117	299	0.8865	101.814	272	0.9384	96.0377	301	0.8878	107.456	224	0.8482	81.3841	301	0.9316	115.637	281	0.8646	110.272
ENSRNOG00000010727	Ube2r2	1320	349	0.8447	73.9821	282	0.9114	54.6119	269	0.9667	55.407	374	0.972	69.7422	279	0.978	59.0191	298	0.9561	57.0382	306	0.9576	57.7032	293	0.9485	57.2907	273	0.9758	53.9724	283	0.9326	56.9405	332	0.9712	70.6339	237	0.8871	51.5051
ENSRNOG00000028834	Polr2a	5913	348	0.5637	16.4682	245	0.7473	10.5918	149	0.6137	6.85117	325	0.8236	13.5292	270	0.7477	12.7502	205	0.6658	8.7593	283	0.7884	11.9133	261	0.7369	11.3926	261	0.7712	11.519	233	0.746	10.4654	280	0.8248	13.2984	222	0.7389	10.7701
ENSRNOG00000048682	Zwint	1760	347	0.921	55.1686	620	0.9886	90.0515	427	0.9852	65.9632	567	0.9915	79.2992	527	0.9864	83.6103	524	0.9864	75.2215	555	0.9864	78.4933	580	0.9892	85.0561	470	0.9812	69.6896	489	0.9841	73.7913	650	0.9972	103.717	394	0.9665	64.2184
ENSRNOG00000008176	Nppa	814	344	0.9828	118.252	449	0.9828	141.005	279	0.9902	93.1894	386	0.9791	116.724	374	0.9803	128.295	331	0.9828	102.737	390	0.9803	119.259	350	0.9865	110.977	212	0.9914	67.9664	369	0.9816	120.396	476	0.9877	164.222	257	0.9877	90.5701
ENSRNOG00000028884	Atp5l	503	343	0.9404	190.81	1395	0.9761	708.955	1896	0.9761	1024.84	1052	0.9344	514.809	1080	0.9861	599.54	2215	0.9642	1112.57	958	0.994	474.078	1186	0.9642	608.565	1931	0.9722	1001.84	923	0.996	487.352	1402	0.996	782.761	1677	0.9841	956.403
ENSRNOG00000003290	Prrc2c	8535	343	0.6697	11.2452	318	0.7665	9.52436	210	0.6752	6.68963	406	0.8341	11.709	311	0.7839	10.1746	222	0.6934	6.57163	315	0.772	9.18669	329	0.7822	9.94907	235	0.7169	7.18534	327	0.8081	10.1754	355	0.8273	11.6808	270	0.7025	9.07478
ENSRNOG00000010037	Epb4.1	3283	343	0.8309	29.2347	306	0.8931	23.8266	182	0.8346	15.0726	405	0.8922	30.3656	270	0.8916	22.9644	234	0.8925	18.0081	356	0.8626	26.9918	309	0.8937	24.2928	285	0.8687	22.6546	305	0.8977	24.6739	353	0.9473	30.1963	242	0.9181	21.1456
ENSRNOG00000001247	Clip1	4574	343	0.8203	20.9833	351	0.8902	19.6166	211	0.7984	12.5422	553	0.9246	29.7596	371	0.8776	22.6485	262	0.8382	14.472	455	0.906	24.761	372	0.8876	20.9912	298	0.8566	17.0021	473	0.9104	27.4646	433	0.9362	26.5853	247	0.8682	15.4909
ENSRNOG00000000799	Abcf1	3092	342	0.9321	30.9501	464	0.9935	38.3611	388	0.9948	34.1176	546	0.9964	43.4662	437	0.9809	39.4643	483	0.9922	39.4667	455	0.9774	36.6289	447	0.9842	37.3128	444	0.989	37.4737	520	0.9922	44.6656	542	0.9916	49.2276	435	0.9848	40.3576
ENSRNOG00000018816	Cox5a	660	342	0.8682	144.996	1284	0.8788	497.317	1324	0.8788	545.419	1195	0.8818	445.679	1007	0.8788	426.037	1496	0.8833	572.679	1002	0.8773	377.899	1129	0.8788	441.51	1378	0.8818	544.864	968	0.8773	389.53	1400	0.8818	595.708	1174	0.8803	510.27
ENSRNOG00000004159	Flii	3998	342	0.8632	23.9364	503	0.968	32.1616	387	0.9522	26.3181	638	0.975	39.2804	431	0.9725	30.1021	449	0.9542	28.3744	499	0.9545	31.0678	533	0.9775	34.4092	497	0.9712	32.4412	528	0.964	35.0752	571	0.9535	40.1091	432	0.9575	30.9968
ENSRNOG00000014078	Ndufb8	678	341	0.9174	140.734	799	0.9838	301.252	944	0.9882	378.555	753	0.9853	273.378	606	0.9897	249.577	997	0.9926	371.526	698	0.9941	256.258	652	0.9897	248.204	930	0.9941	357.961	628	0.9764	246.002	800	0.9882	331.367	861	0.9897	364.292
ENSRNOG00000002934	Atp1b1	2201	341	0.8546	43.352	857	0.9291	99.5343	703	0.9223	86.8404	893	0.9396	99.8687	762	0.9364	96.6712	879	0.9359	100.9	800	0.9378	90.4737	946	0.9373	110.933	911	0.9387	108.014	775	0.94	93.517	941	0.9396	120.066	724	0.9368	94.3614
ENSRNOG00000011732	Psmb7	964	339	0.9927	98.4006	458	0.9927	121.451	463	0.9927	130.584	406	0.9938	103.669	406	0.9927	117.601	497	0.9927	130.258	400	0.9938	103.285	380	0.9938	101.741	465	0.9927	125.881	371	0.9938	102.213	417	0.9927	121.481	400	0.9938	119.031
ENSRNOG00000016459	Eif3j	1811	339	0.8078	52.3789	672	0.9072	94.8556	589	0.91	88.4267	734	0.8951	99.7644	591	0.8791	91.1237	657	0.8752	91.658	654	0.9023	89.89	703	0.8675	100.191	606	0.8995	87.3247	741	0.894	108.67	755	0.889	117.079	531	0.9023	84.1109
ENSRNOG00000017965	Afg3l2	3074	339	0.8894	30.8582	567	0.946	47.151	385	0.948	34.0521	706	0.9779	56.5326	517	0.9736	46.9622	483	0.9736	39.6978	88	0.7082	7.12576	88	0.6737	7.38872	88	0.6659	7.47071	585	0.9567	50.543	587	0.9483	53.627	438	0.9411	40.8739
ENSRNOG00000009381	Mapk6	4173	337	0.7956	22.5973	463	0.9353	28.3625	399	0.9312	25.9963	633	0.9564	37.3382	473	0.925	31.6501	506	0.9315	30.6355	555	0.9137	33.1052	601	0.9444	37.172	509	0.9485	31.8312	564	0.9375	35.8955	534	0.9351	35.937	457	0.93	31.4155
ENSRNOG00000009097	Immt	1911	336	0.9602	49.1987	603	0.9728	80.662	445	0.9906	63.312	730	0.9791	94.0287	556	0.9733	81.2412	521	0.9445	68.8812	603	0.9686	78.5432	626	0.9801	84.5481	596	0.9838	81.3895	551	0.9451	76.5773	670	0.9676	98.4608	449	0.977	67.4003
ENSRNOG00000030954	Fat1	14744	336	0.4592	6.37675	405	0.5714	7.02185	193	0.3333	3.559	487	0.6438	8.1304	425	0.607	8.04888	288	0.4664	4.93515	422	0.58	7.12442	431	0.6534	7.54488	297	0.5315	5.25683	443	0.6021	7.9799	421	0.5663	8.01892	286	0.4757	5.56451
ENSRNOG00000009538	Etfdh	2527	335	0.8769	37.0949	803	0.9216	81.2311	637	0.9584	68.5363	848	0.9517	82.6017	714	0.9493	78.896	800	0.9608	79.9849	676	0.9197	66.5876	817	0.9082	83.4463	703	0.962	72.5994	679	0.9276	71.3631	870	0.9509	96.6859	690	0.9501	78.3285
ENSRNOG00000018668	Glg1	5298	334	0.7892	17.6405	558	0.9653	26.9237	355	0.893	18.2181	644	0.9707	29.9207	506	0.9336	26.6686	427	0.923	20.3629	538	0.9334	25.2768	533	0.9394	25.966	488	0.9294	24.0376	521	0.9507	26.1177	671	0.9479	35.568	401	0.8971	21.7124
ENSRNOG00000002467	Pgk1	1733	334	0.865	53.9291	1080	0.8909	159.308	1021	0.8915	160.182	1094	0.8886	155.388	984	0.8869	158.547	1113	0.8869	162.263	396	0.8759	56.8786	392	0.8875	58.3818	434	0.8846	65.3543	276	0.8782	42.298	318	0.8748	51.5321	273	0.8569	45.1898
ENSRNOG00000023509	Irs2	6301	334	0.7529	14.8324	464	0.9087	18.8244	312	0.8008	13.4627	644	0.9538	25.1579	470	0.8786	20.8281	321	0.8353	12.8712	462	0.8791	18.2509	501	0.8818	20.5219	369	0.8497	15.2827	439	0.92	18.5039	512	0.9221	22.8197	355	0.8737	16.162
ENSRNOG00000005053	Egln3	2817	333	0.8541	33.0775	533	0.8896	48.3674	454	0.8981	43.8183	311	0.8942	27.1751	211	0.7987	20.915	281	0.8921	25.2025	533	0.8914	47.0969	519	0.9162	47.5522	552	0.9091	51.137	30	0.3543	2.82842	30	0.3546	2.99077	30	0.4267	3.05499
ENSRNOG00000003163	Sdhc	1148	332	0.8659	80.9229	727	0.9878	161.884	655	0.9939	155.126	661	0.9965	141.729	555	0.9617	134.994	802	0.9887	176.505	600	0.9826	130.095	634	0.9843	142.54	720	0.9634	163.672	608	0.9721	140.66	631	0.9895	154.361	656	0.9582	163.922
ENSRNOG00000015320	Atp5g2	630	332	0.9587	147.46	715	0.9746	290.12	760	0.9857	327.989	662	0.9905	258.652	540	0.9857	239.34	804	0.9937	322.433	608	0.9873	240.223	654	0.9857	267.934	680	0.9905	281.677	600	0.9921	252.941	673	0.9841	300.002	663	0.9889	301.89
ENSRNOG00000009513	Akr1b1	1339	332	0.8872	69.3798	832	0.938	158.838	710	0.9343	144.166	740	0.944	136.035	692	0.9328	144.307	743	0.9455	140.195	673	0.9328	125.108	767	0.9276	147.844	699	0.947	136.232	661	0.9298	131.108	870	0.9432	182.469	657	0.9432	140.754
ENSRNOG00000014453	Anxa5	1487	332	0.9812	62.4744	806	0.9738	138.559	581	0.9866	106.231	692	0.9966	114.55	636	0.9872	119.429	681	0.9966	115.707	665	0.9966	111.317	807	0.9946	140.072	655	0.9966	114.951	622	0.9973	111.093	751	0.998	141.833	544	0.9866	104.946
ENSRNOG00000018735	Cd74	1414	331	0.558	65.5019	424	0.8501	76.6529	405	0.7949	77.8739	377	0.7461	65.6281	410	0.7228	80.9649	428	0.7963	76.4747	367	0.7136	64.6054	396	0.7263	72.283	447	0.7935	82.4976	332	0.7157	62.3588	390	0.7928	77.4577	376	0.8126	76.2807
ENSRNOG00000005698	Ndufa5	546	330	0.8755	169.121	891	0.8938	417.155	1111	0.8626	553.233	686	0.8315	309.264	690	0.9249	352.873	1299	0.8736	601.091	635	0.8773	289.49	719	0.8407	339.881	1113	0.8864	531.968	624	0.8755	303.529	891	0.8919	458.284	1090	0.8736	572.677
ENSRNOG00000008605	OST4	552	330	0.8134	167.282	249	0.9493	115.311	301	0.9366	148.257	219	0.9275	97.657	193	0.8986	97.6293	314	0.9656	143.719	220	0.9402	99.2055	227	0.9257	106.14	248	0.9475	117.245	185	0.9221	89.0106	203	0.9565	103.278	243	0.9239	126.283
ENSRNOG00000010668	Anxa6	2513	329	0.8997	36.6335	413	0.9757	42.0116	335	0.9678	36.2442	429	0.9717	42.0207	414	0.9773	46.0013	382	0.9873	38.4056	372	0.9793	36.847	406	0.9694	41.6988	395	0.9877	41.0192	356	0.9801	37.6241	438	0.9785	48.9475	335	0.9522	38.2409
ENSRNOG00000002394	Tpr	7527	329	0.6862	12.2306	395	0.8513	13.4149	275	0.7528	9.93339	493	0.8812	16.1222	412	0.8577	15.284	320	0.7801	10.7412	372	0.8209	12.3019	454	0.8652	15.5677	317	0.757	10.9906	407	0.8782	14.3609	434	0.8628	16.1926	337	0.8238	12.8435
ENSRNOG00000007290	Atp1a2	5128	329	0.781	17.9524	391	0.946	19.4913	368	0.9275	19.5113	557	0.9442	26.7365	391	0.9236	21.2907	414	0.9035	20.3974	499	0.9444	24.2217	420	0.9349	21.1393	379	0.9126	19.2874	489	0.9288	25.3262	474	0.9382	25.9585	381	0.9011	21.3134
ENSRNOG00000034254	Actb	1267	329	0.97	72.6599	547	0.9913	110.363	481	0.9905	103.218	411	0.9905	79.8479	366	0.9882	80.6615	516	0.9913	102.896	429	0.9897	84.2816	406	0.9874	82.7065	474	0.9905	97.6303	383	0.9874	80.2844	508	0.989	112.599	527	0.9929	119.319
ENSRNOG00000014997	Igf2r	8787	328	0.6482	10.445	533	0.8146	15.506	347	0.6626	10.7368	746	0.92	20.8976	497	0.8282	15.7935	421	0.732	12.105	509	0.8189	14.4188	587	0.8745	17.242	515	0.8664	15.295	564	0.873	17.047	673	0.8812	21.5092	492	0.8168	16.062
ENSRNOG00000001211	RGD1303003	1276	328	0.9906	71.9281	875	0.9945	175.295	746	0.9969	158.955	787	0.9969	151.818	655	0.9922	143.335	850	0.9969	168.303	722	0.9969	140.844	770	0.9953	155.751	829	0.9914	169.546	696	0.9929	144.866	874	0.9922	192.358	749	0.9914	168.386
ENSRNOG00000002994	Popdc2	2224	328	0.955	41.2681	450	0.9681	51.7237	318	0.9622	38.8758	501	0.9541	55.4499	422	0.9906	52.9834	374	0.996	42.4874	440	0.9658	49.2459	460	0.9906	53.3843	401	0.9775	47.0536	389	0.9879	46.4541	463	0.9825	58.4649	387	0.9726	49.9174
ENSRNOG00000007312	Arl8b	2728	327	0.8944	33.5412	543	0.9582	50.8824	420	0.9644	41.8592	624	0.9908	56.3039	476	0.9806	48.722	466	0.967	43.1584	532	0.9857	48.5422	489	0.9806	46.2652	422	0.9549	40.3693	495	0.9784	48.1914	516	0.9809	53.1196	400	0.9472	42.0622
ENSRNOG00000007628	Ptp4a3	1327	327	0.9955	68.9528	402	0.9962	77.4403	332	0.9955	68.0227	445	0.994	82.5443	326	0.9887	68.5976	347	0.9864	66.0666	376	0.9962	70.5292	401	0.9962	77.9945	368	0.9977	72.3702	371	0.9872	74.2526	433	0.9962	91.636	354	0.9744	76.5259
ENSRNOG00000014705	Rbm20	6682	326	0.679	13.6517	482	0.8893	18.4397	304	0.7836	12.3695	622	0.9268	22.913	390	0.8673	16.2975	360	0.8848	13.6119	507	0.909	18.8866	438	0.8729	16.9183	374	0.853	14.6066	552	0.9068	21.9402	460	0.9165	19.3331	362	0.8406	15.541
ENSRNOG00000025715	Dynlrb1	658	326	0.9909	138.633	415	0.9924	161.226	507	0.9924	209.493	426	0.9894	159.361	341	0.9894	144.707	533	0.9909	204.656	385	0.9878	145.642	357	0.9863	140.034	500	0.9954	198.302	305	0.9939	123.107	412	0.9894	175.841	441	0.9909	192.26
ENSRNOG00000002255	Fam162a	670	326	0.9463	136.15	594	0.9493	226.633	657	0.9567	266.61	500	0.9597	183.693	510	0.9522	212.548	700	0.9552	263.965	479	0.9388	177.956	537	0.9463	206.866	631	0.9463	245.775	451	0.9403	178.777	631	0.9522	264.487	610	0.9507	261.175
ENSRNOG00000008981	Pdcd6ip	5789	325	0.6331	15.7092	425	0.8542	18.7671	308	0.8077	14.4655	559	0.8575	23.7688	366	0.7557	17.6539	363	0.796	15.8426	432	0.8155	18.5752	432	0.8013	19.2606	400	0.7804	18.0318	421	0.7894	19.3147	416	0.824	20.1808	331	0.7357	16.4021
ENSRNOG00000002135	Sgcb	3695	325	0.8087	24.6118	627	0.9548	43.3776	425	0.9375	31.2724	738	0.9908	49.1632	548	0.9716	41.4122	498	0.9589	34.0517	612	0.9805	41.2277	641	0.9935	44.7748	460	0.957	32.4883	627	0.9794	45.0674	570	0.9681	43.3221	427	0.9415	33.1504
ENSRNOG00000021164	Stip1	2030	324	0.9517	44.6606	514	0.9877	64.7261	393	0.9887	52.636	452	0.9877	54.8076	410	0.9926	56.3962	366	0.9877	45.5521	416	0.9857	51.0093	482	0.9872	61.2832	394	0.9803	50.6504	413	0.9793	54.0335	487	0.9749	67.3724	380	0.9788	53.6987
ENSRNOG00000021085	Sf1	2736	324	0.9094	33.1363	305	0.9572	28.4968	273	0.8929	27.129	363	0.9433	32.6579	273	0.9397	27.8618	318	0.9258	29.3653	343	0.9324	31.2054	350	0.9039	33.0174	313	0.9101	29.8546	332	0.9174	32.2278	349	0.9349	35.8227	288	0.9547	30.1962
ENSRNOG00000007235	Atp5g1	579	324	0.8739	156.582	988	0.9136	436.205	1189	0.9119	558.328	874	0.9136	371.562	689	0.8877	332.279	1254	0.9136	547.195	821	0.9136	352.953	830	0.9085	369.99	1188	0.9119	535.452	209	0.8687	95.8687	302	0.8739	146.48	305	0.8895	151.111
ENSRNOG00000015036	Ctgf	2333	323	0.9113	38.7403	1062	0.9803	116.365	642	0.9799	74.8181	881	0.9876	92.9521	943	0.9867	112.865	813	0.979	88.0439	118	0.8457	12.5898	118	0.8397	13.0544	118	0.9091	13.1993	832	0.9747	94.7147	1087	0.9846	130.847	719	0.9781	88.4077
ENSRNOG00000005828	Skp1	1614	322	0.7633	55.8249	707	0.8507	111.977	655	0.8693	110.338	160	0.7906	24.4014	160	0.8135	27.6808	160	0.7466	25.0461	581	0.8556	89.6035	627	0.8086	100.266	726	0.886	117.386	574	0.8767	94.4533	743	0.8457	129.281	704	0.8445	125.125
ENSRNOG00000016031	Bicd2	4568	322	0.8623	19.7245	550	0.9617	30.7786	404	0.9284	24.0459	116	0.7384	6.25072	116	0.6465	7.09078	116	0.6721	6.41587	548	0.9549	29.8612	620	0.9869	35.0313	515	0.977	29.4215	587	0.979	34.1288	624	0.9678	38.3626	454	0.9394	28.5106
ENSRNOG00000004060	Calm1	3515	322	0.7826	25.6334	608	0.9505	44.2171	569	0.8728	44.0122	563	0.9317	39.4259	492	0.8478	39.0843	602	0.9496	43.2708	575	0.9178	40.7188	546	0.9297	40.092	523	0.8942	38.8293	524	0.9127	39.5927	601	0.9411	48.0174	547	0.9064	44.6414
ENSRNOG00000017428	Map1b	11866	320	0.5647	7.54607	382	0.6924	8.22946	283	0.5635	6.48438	418	0.7231	8.67102	335	0.6406	7.8832	320	0.6322	6.81348	424	0.7412	8.89434	354	0.6513	7.69997	321	0.676	7.05966	401	0.719	8.9753	348	0.6642	8.23615	307	0.6339	7.42181
ENSRNOG00000016372	Slc12a7	5003	320	0.7911	17.8976	398	0.8737	20.336	266	0.7789	14.4557	512	0.9085	25.1905	344	0.8397	19.1995	307	0.8343	15.5036	392	0.9023	19.5033	387	0.8869	19.9651	322	0.8689	16.7961	396	0.9039	21.022	384	0.8969	21.5551	307	0.8339	17.6029
ENSRNOG00000001709	Ap2m1	1849	320	0.9508	48.4271	469	0.9908	64.8408	392	0.9886	57.6416	511	0.9951	68.0271	362	0.9886	54.6681	468	0.9919	63.9488	428	0.9735	57.6181	411	0.9838	57.3714	395	0.9859	55.7498	412	0.9778	59.1792	490	0.9843	74.4232	390	0.9849	60.5067
ENSRNOG00000007583	Pygb	3856	320	0.9059	23.2214	607	0.9876	40.2405	499	0.9798	35.1844	173	0.8247	11.0435	170	0.8058	12.3105	168	0.8452	11.0077	702	0.9969	45.3161	632	0.9914	42.3029	622	0.9881	42.0956	646	0.9831	44.4943	718	0.9909	52.2922	583	0.9868	43.3718
ENSRNOG00000014883	Git1	3145	319	0.8423	28.3821	357	0.9278	29.0175	311	0.9666	26.886	56	0.5688	4.38294	56	0.6394	4.97198	56	0.5844	4.49874	239	0.9199	18.916	247	0.9507	20.2706	284	0.9533	23.5657	329	0.939	27.7833	355	0.9552	31.6998	335	0.9587	30.5563
ENSRNOG00000018796	Herpud1	1860	319	0.9446	47.9902	518	0.9952	71.1916	380	0.9957	55.5466	458	0.9801	60.6109	488	0.9817	73.2603	396	0.9855	53.7905	493	0.9817	65.976	466	0.9806	64.6641	353	0.9952	49.5273	413	0.9973	58.972	581	0.9801	87.7228	339	0.9785	52.2833
ENSRNOG00000008822	Fkbp1a	1497	319	0.984	59.6272	504	0.988	86.0639	509	0.9953	92.4448	554	0.9893	91.0932	428	0.9953	79.8333	518	0.9967	87.4241	448	0.9806	74.4918	461	0.978	79.4821	519	0.9933	90.475	469	0.9967	83.207	543	0.9953	101.866	438	0.9927	83.9321
ENSRNOG00000011146	Gyg1	1600	319	0.9394	55.7887	601	0.9919	96.0211	550	0.9906	93.4607	693	0.995	106.613	514	0.9925	89.7026	616	0.9938	97.2712	84	0.7538	13.0681	84	0.8588	13.5503	84	0.8688	13.7007	39	0.6431	6.47371	39	0.5863	6.84532	39	0.6531	6.99231
ENSRNOG00000020457	Tacc2	9192	316	0.57	9.6195	321	0.6407	8.92703	254	0.4853	7.51294	458	0.7195	12.2646	324	0.6251	9.84231	310	0.542	8.5207	394	0.6492	10.6694	394	0.6661	11.0631	344	0.6146	9.76633	358	0.6746	10.3438	387	0.677	11.8236	301	0.6481	9.39361
ENSRNOG00000011504	Akap2	3442	316	0.9053	25.6893	398	0.9654	29.5586	296	0.9204	23.3812	471	0.9628	33.6828	373	0.9617	30.2594	459	0.9753	33.6919	394	0.959	28.493	423	0.9826	31.719	440	0.9602	33.3599	396	0.9698	30.5558	399	0.9497	32.5545	353	0.9678	29.4198
ENSRNOG00000029028	Mknk2	3469	316	0.9233	25.4893	397	0.9752	29.2549	312	0.9271	24.4533	459	0.9651	32.5692	331	0.9216	26.6432	308	0.9403	22.4321	80	0.6425	5.74034	80	0.5835	5.95218	80	0.6714	6.01823	364	0.9648	27.868	389	0.9671	31.4916	315	0.9545	26.0485
ENSRNOG00000011949	Ndufb5	1062	316	0.5725	83.2603	791	0.6431	190.399	847	0.6252	216.843	672	0.6422	155.755	667	0.6026	175.373	991	0.6582	235.761	597	0.6168	139.927	740	0.629	179.845	895	0.6271	219.929	652	0.58	163.054	760	0.6281	200.973	853	0.5556	230.41
ENSRNOG00000012482	Ndrg4	2918	314	0.8855	30.1106	648	0.9931	56.7678	489	0.987	45.5628	691	0.9938	58.2896	566	0.9983	54.1618	672	0.9983	58.1845	544	0.9976	46.4051	676	0.9901	59.7932	709	0.9887	63.408	554	0.9901	50.4236	704	0.9815	67.7543	571	0.974	56.1341
ENSRNOG00000016419	Pdlim5	1867	314	0.8806	47.0609	439	0.9031	60.108	326	0.9014	47.4744	516	0.9464	68.0305	373	0.8473	55.7862	369	0.9148	49.9351	459	0.932	61.1957	465	0.9625	64.2834	408	0.978	57.0294	385	0.9122	54.7678	416	0.9534	62.5746	341	0.9422	52.3945
ENSRNOG00000020167	Reep5	2900	314	0.8514	30.2975	518	0.9621	45.6608	448	0.9055	42.0017	520	0.9659	44.1371	435	0.9448	41.8845	530	0.9614	46.1744	465	0.9272	39.9123	483	0.9476	42.9872	514	0.9541	46.2539	443	0.9421	40.5709	571	0.949	55.2952	448	0.9414	44.3155
ENSRNOG00000016779	Fam120a	4989	314	0.7426	17.6113	341	0.8777	17.4724	257	0.8002	14.0057	479	0.9218	23.6331	356	0.8485	19.925	345	0.8765	17.4715	394	0.8932	19.6578	410	0.9028	21.211	362	0.8779	18.9356	334	0.8547	17.7804	436	0.9028	24.5427	285	0.8258	16.3873
ENSRNOG00000048430	Myo18b	7656	314	0.7275	11.4763	445	0.8579	14.8583	236	0.7113	8.38101	505	0.8393	16.2363	367	0.806	13.3852	355	0.7922	11.7152	442	0.8707	14.3705	410	0.893	13.822	349	0.8495	11.8962	451	0.8674	15.6453	483	0.8763	17.7172	290	0.7672	10.8661
ENSRNOG00000049912	Atp5e	411	313	0.9392	213.097	873	0.9854	542.981	1148	0.9854	759.428	684	0.9586	409.65	668	0.983	453.834	1221	0.9562	750.581	623	0.9367	377.31	748	0.9562	469.732	1075	0.9611	682.574	630	0.9586	407.106	909	0.9805	621.114	981	0.9489	684.704
ENSRNOG00000006905	Hectd1	8650	313	0.6801	10.1252	486	0.792	14.3626	361	0.7156	11.3469	733	0.9207	20.8586	525	0.843	16.9475	442	0.8176	12.9101	560	0.8518	16.1148	585	0.8823	17.4554	484	0.8202	14.602	602	0.9032	18.4837	573	0.8793	18.6032	406	0.7766	13.4644
ENSRNOG00000003261	Usp9x	10475	313	0.54	8.36114	498	0.7101	12.1531	309	0.6109	8.02031	613	0.8116	14.4047	560	0.8032	14.9278	441	0.7048	10.6367	469	0.7534	11.1448	612	0.7911	15.0795	460	0.7289	11.4601	550	0.7926	13.945	561	0.74	15.0404	418	0.7129	11.4472
ENSRNOG00000000635	Arid5b	3527	312	0.8407	24.7528	258	0.8758	18.6993	149	0.7692	11.486	295	0.9254	20.588	226	0.8784	17.8923	161	0.7885	11.533	241	0.8823	17.0084	237	0.9019	17.3434	191	0.8673	14.1322	244	0.8636	18.3736	263	0.9076	20.9411	198	0.8259	16.1041
ENSRNOG00000010748	Mtus1	4090	311	0.8465	21.2771	484	0.9621	30.2506	405	0.9259	26.9227	546	0.9472	32.86	451	0.933	30.7904	509	0.9557	31.4426	471	0.9648	28.6649	497	0.9643	31.3634	507	0.9645	32.3495	446	0.9342	28.9615	520	0.9386	35.705	511	0.9851	35.8405
ENSRNOG00000011282	Ppp2r1a	2201	311	0.8492	39.5381	461	0.9855	53.5418	412	0.9773	50.8937	461	0.985	51.556	360	0.965	45.6714	413	0.9832	47.4082	414	0.955	46.8201	440	0.9923	51.5968	463	0.9859	54.8964	403	0.9773	48.6288	486	0.9873	62.0105	383	0.9773	49.9177
ENSRNOG00000014272	Rpl35	446	310	0.8834	194.492	489	0.8879	280.276	652	0.9103	397.465	445	0.9148	245.597	423	0.9013	264.83	745	0.9103	422.031	415	0.9193	231.614	425	0.9126	245.949	627	0.9148	366.873	432	0.8946	257.251	418	0.9081	263.203	544	0.9126	349.897
ENSRNOG00000010984	Anxa11	2287	310	0.9248	37.9289	458	0.9974	51.1931	298	0.9882	35.4272	477	0.9961	51.3394	347	0.9987	42.3668	379	0.9891	41.8694	397	0.9961	43.2092	404	0.9961	45.5938	410	0.9869	46.7844	392	0.9921	45.5228	439	0.9983	53.9073	319	0.9825	40.0129
ENSRNOG00000009012	Asb2	2483	310	0.9303	34.935	407	0.9996	41.9015	253	0.9774	27.7032	574	0.9843	56.9028	411	0.9758	46.2197	277	0.9923	28.1855	435	0.9948	43.6079	378	0.9932	39.2921	310	0.9658	32.5813	449	0.9988	48.0262	423	0.9923	47.8424	251	0.9847	28.9983
ENSRNOG00000000804	Mrps18b	1064	308	0.9868	80.9999	472	0.9925	113.4	341	0.9878	87.1363	431	0.9925	99.7089	390	0.9859	102.349	415	0.9812	98.5439	437	0.9906	102.233	418	0.9934	101.397	380	0.9887	93.2019	365	0.9934	91.1088	488	0.9878	128.803	314	0.9981	84.6572
ENSRNOG00000007648	Rab11b	1503	308	0.9854	57.3412	358	0.99	60.8886	330	0.9894	59.6955	385	0.9894	63.0522	351	0.9927	65.2094	409	0.9894	68.7524	358	0.994	59.2893	410	0.9874	70.4069	381	0.9887	66.1529	310	0.9887	54.7787	387	0.9927	72.3105	341	0.9787	65.0836
ENSRNOG00000017447	Eif2s2	1434	308	0.8668	60.1003	662	0.9463	118.011	613	0.9554	116.225	555	0.9554	95.2669	550	0.9156	107.097	676	0.9121	119.103	555	0.9059	96.3377	593	0.947	106.732	518	0.9031	94.2679	598	0.9449	110.754	664	0.9142	130.037	574	0.9066	114.826
ENSRNOG00000016271	Itm2b	1755	308	0.796	49.1076	720	0.9715	104.874	753	0.9658	116.655	639	0.9345	89.6235	582	0.9766	92.5994	798	0.9783	114.881	570	0.9658	80.8444	603	0.9521	88.681	650	0.9652	96.6539	594	0.9692	89.8914	705	0.9772	112.814	662	0.9715	108.207
ENSRNOG00000012247	Rab7a	2075	307	0.8525	41.3995	403	0.9827	49.6477	336	0.9923	44.0258	419	0.9682	49.7043	337	0.9817	45.3496	386	0.9836	46.9994	345	0.986	41.386	357	0.9913	44.4059	341	0.9937	42.8864	341	0.9788	43.6461	396	0.988	53.5953	283	0.9764	39.1241
ENSRNOG00000042838	Junb	1035	307	0.9758	82.9991	320	0.9981	79.0354	249	0.999	65.4102	256	0.999	60.8832	186	0.9894	50.1805	206	0.9807	50.2864	287	0.9952	69.023	224	0.9971	55.8596	185	0.9981	46.646	257	0.9971	65.948	329	0.9971	89.2698	239	0.9923	66.242
ENSRNOG00000010708	Gata4	3311	307	0.8124	25.945	283	0.8816	21.8494	231	0.8765	18.9688	419	0.9423	31.1496	259	0.8611	21.8425	291	0.9024	22.2053	313	0.9034	23.5308	371	0.9381	28.9204	343	0.9239	27.0345	302	0.8608	24.2246	305	0.8759	25.8696	257	0.8961	22.2664
ENSRNOG00000020788	EHBP1L1	5625	306	0.8229	15.2221	450	0.9292	20.4504	349	0.888	16.869	541	0.9292	23.6741	412	0.8912	20.452	401	0.9317	18.0113	473	0.9419	20.931	443	0.9552	20.3269	401	0.9124	18.6039	439	0.9428	20.7277	554	0.9584	27.659	352	0.8932	17.9513
ENSRNOG00000017250	Gmpr	1432	306	0.9434	59.7935	496	0.9881	88.5423	396	0.9763	75.1863	540	0.9832	92.8216	410	0.9539	79.9471	414	0.9797	73.0434	441	0.9539	76.6563	448	0.9749	80.7468	447	0.9791	81.4606	440	0.9553	81.6053	522	0.9874	102.371	390	0.9839	78.1264
ENSRNOG00000018602	Camta1	7225	305	0.5831	11.8124	454	0.7089	16.0631	308	0.6451	11.5904	611	0.7347	20.8162	371	0.6742	14.3383	503	0.6807	17.5895	498	0.6983	17.1571	452	0.6976	16.147	445	0.6908	16.0733	511	0.7052	18.7842	493	0.6977	19.1628	383	0.6829	15.2068
ENSRNOG00000023383	DDX3X	4638	305	0.8223	18.4011	625	0.9778	34.4478	487	0.9549	28.5486	835	0.9914	44.3153	573	0.9614	34.4974	680	0.9922	37.0426	657	0.9845	35.2604	712	0.9862	39.6223	544	0.9942	30.6091	633	0.9828	36.2478	660	0.9912	39.9634	489	0.9564	30.245
ENSRNOG00000010170	Tubb4b	1551	304	0.9123	54.845	499	0.951	82.2434	370	0.9362	64.8599	561	0.9439	89.0326	388	0.9458	69.8525	394	0.9452	64.1812	535	0.9446	85.8607	461	0.9458	76.7148	419	0.9362	70.4994	447	0.9381	76.5429	446	0.9433	80.7555	378	0.94	69.9127
ENSRNOG00000008578	Cdk16	2965	303	0.857	28.5952	284	0.8698	24.4853	267	0.8877	24.4835	425	0.9538	35.2827	272	0.8934	25.6157	290	0.8779	24.7114	306	0.9191	25.6891	302	0.9278	26.2889	307	0.9089	27.0207	288	0.8988	25.7974	300	0.9039	28.4149	302	0.883	29.2185
ENSRNOG00000046109	-	759	303	0.805	111.706	267	0.8709	89.9252	246	0.8959	88.1211	300	0.8933	97.2921	231	0.8617	84.983	231	0.8722	76.8942	242	0.9157	79.3644	291	0.9038	98.9559	258	0.917	88.7076	232	0.9328	81.1811	272	0.892	100.641	252	0.8801	95.2434
ENSRNOG00000011876	Fxr2	2644	302	0.7908	31.961	311	0.9542	30.0685	294	0.9467	30.2324	384	0.986	35.7493	260	0.9554	27.4583	274	0.9675	26.1826	320	0.9724	30.1259	292	0.9788	28.5044	297	0.9569	29.3142	275	0.9482	27.6236	323	0.9735	34.3076	240	0.9175	26.0391
ENSRNOG00000003873	Cpd	4376	302	0.8215	19.311	390	0.9168	22.7824	243	0.8396	15.0979	431	0.971	24.2437	293	0.9063	18.6962	235	0.8259	13.5679	452	0.9468	25.7107	427	0.9575	25.1849	393	0.9191	23.4368	30	0.2628	1.82076	30	0.2845	1.92528	30	0.2822	1.96662
ENSRNOG00000015396	Sptan1	7871	302	0.7129	10.7362	442	0.8529	14.355	336	0.785	11.6064	525	0.9123	16.4183	413	0.87	14.6515	434	0.8482	13.931	447	0.8345	14.1361	467	0.8555	15.3136	469	0.8541	15.5498	445	0.8777	15.0155	592	0.9167	21.1223	465	0.8689	16.9472
ENSRNOG00000002671	Nme2	746	302	0.941	113.277	655	0.9598	224.447	789	0.9437	287.557	576	0.933	190.056	477	0.9263	178.543	852	0.9517	288.552	553	0.937	184.518	568	0.9424	196.517	746	0.9571	260.965	504	0.9504	179.432	615	0.9598	231.518	721	0.9357	277.251
ENSRNOG00000019459	Oaz1	1044	301	0.9358	80.6754	881	0.9732	215.719	824	0.9761	214.592	771	0.955	181.782	629	0.9693	168.233	1025	0.9713	248.054	172	0.9588	41.0091	170	0.9397	42.028	195	0.932	48.7435	127	0.9511	32.3082	129	0.9444	34.7007	115	0.887	31.599
ENSRNOG00000049876	Prkar1a	1434	301	0.9798	58.7344	667	0.993	118.902	530	0.977	100.488	688	0.9951	118.097	614	0.9888	119.559	619	0.9874	109.06	548	0.9854	95.1226	642	0.9895	115.552	727	0.9972	132.303	566	0.9958	104.828	774	0.9902	151.58	550	0.9881	110.025
ENSRNOG00000030237	Cox7c	474	301	0.8671	177.69	965	0.9873	520.429	1145	0.943	656.771	751	0.8797	389.996	723	0.9177	425.914	1281	0.9768	682.801	701	0.884	368.122	742	0.8544	404.032	1129	0.8987	621.582	768	0.846	430.32	967	0.9831	572.924	1116	0.9789	675.401
ENSRNOG00000006997	App	3163	301	0.9045	26.6282	609	0.982	49.2187	432	0.9782	37.1339	689	0.9918	53.6189	538	0.9883	47.4947	532	0.9943	42.4948	607	0.987	47.7685	535	0.9877	43.6561	546	0.9902	45.0481	567	0.9839	47.6094	624	0.9851	55.4032	488	0.988	44.2585
ENSRNOG00000006770	Brd4	7037	300	0.6861	11.9291	199	0.6598	7.22899	165	0.5336	6.37504	258	0.7013	9.02465	185	0.6121	7.34085	186	0.6489	6.67804	202	0.6102	7.14523	206	0.641	7.55562	167	0.6192	6.19315	204	0.6437	7.69931	185	0.5883	7.38301	168	0.5666	6.84854
ENSRNOG00000001719	Psmd2	2895	299	0.9019	28.9	740	0.999	65.3424	589	0.9997	55.3163	101	0.7962	8.58758	101	0.7472	9.7417	101	0.762	8.81447	656	0.9969	56.4037	668	0.9983	59.555	671	0.9917	60.4863	587	0.9969	53.8516	821	0.999	79.6423	596	0.999	59.0573
ENSRNOG00000004291	Cltc	6069	298	0.7069	13.7396	528	0.9138	22.2397	384	0.8369	17.2029	654	0.9525	26.5252	473	0.9064	21.7624	515	0.924	21.4394	511	0.9176	20.9583	560	0.9117	23.8156	539	0.9064	23.1769	546	0.9478	23.8938	575	0.9244	26.6072	483	0.9023	22.83
ENSRNOG00000007330	Capzb	1622	297	0.8157	51.2367	296	0.9143	46.6501	240	0.9094	40.2297	343	0.9377	52.0525	267	0.9482	45.9645	342	0.934	53.272	302	0.9494	46.3456	295	0.9223	46.942	276	0.9476	44.406	283	0.9513	46.3388	351	0.942	60.7723	258	0.9513	45.6294
ENSRNOG00000043387	Cpe	1994	297	0.8952	41.678	822	0.9097	105.38	644	0.9022	87.8107	173	0.8831	21.356	173	0.8455	24.2261	173	0.9002	21.9202	773	0.9107	96.4954	810	0.9107	104.846	721	0.9067	94.3611	784	0.9102	104.424	894	0.9102	125.91	703	0.9067	101.136
ENSRNOG00000000796	Ranbp2	10277	296	0.5612	8.05936	564	0.8008	14.0289	364	0.6709	9.62989	723	0.8608	17.3169	592	0.8478	16.0849	449	0.7376	11.0383	134	0.4231	3.24557	134	0.4647	3.36534	134	0.4255	3.40268	624	0.8536	16.126	619	0.8406	16.9151	430	0.7538	12.0027
ENSRNOG00000007895	Pdhb	1786	296	0.7772	46.3752	705	0.8511	100.907	612	0.8208	93.1658	704	0.818	97.0263	615	0.8208	96.1514	734	0.8292	103.834	643	0.8225	89.6152	687	0.8147	99.2809	738	0.8147	107.835	611	0.8219	90.8592	778	0.8191	122.334	612	0.8197	98.2983
ENSRNOG00000020660	Cfl1	1168	296	0.8938	70.9127	464	0.9247	101.552	428	0.958	99.6294	436	0.9195	91.8844	344	0.9563	82.239	468	0.9435	101.234	416	0.9212	88.6549	454	0.9495	100.324	493	0.9289	110.151	355	0.97	80.7225	412	0.9221	99.0612	388	0.9358	95.2938
ENSRNOG00000032034	Supt5	3299	295	0.7793	25.0216	298	0.9388	23.0912	195	0.8333	16.0708	342	0.9333	25.5177	250	0.8903	21.1602	290	0.9309	22.2095	293	0.9203	22.1074	278	0.8994	21.7497	274	0.8948	21.6746	270	0.9154	21.7365	327	0.9412	27.8365	247	0.8975	21.4778
ENSRNOG00000004628	Dazap2	1760	295	0.8659	46.9013	596	0.9966	86.5657	472	0.9574	72.9148	578	0.9932	80.8376	510	0.9932	80.9132	543	0.9932	77.949	488	0.9898	69.0175	558	0.9761	81.8299	513	0.9898	76.0655	482	0.983	72.735	522	0.9943	83.2927	431	0.9915	70.2491
ENSRNOG00000021735	Akr1cl	1302	295	0.9301	63.3996	830	0.9439	162.959	697	0.9401	145.549	955	0.9508	180.547	698	0.9401	149.695	818	0.9424	158.732	770	0.9478	147.208	809	0.9508	160.372	828	0.9808	165.96	52	0.831	10.6072	52	0.821	11.2161	52	0.8226	11.4569
ENSRNOG00000020075	Eef1g	1441	295	0.8112	57.284	510	0.8612	90.4729	601	0.8786	113.396	552	0.8418	94.2917	417	0.8508	80.8042	671	0.8793	117.647	508	0.8786	87.751	499	0.8654	89.3772	676	0.8723	122.424	451	0.8487	83.1231	534	0.8779	104.07	594	0.8688	118.249
ENSRNOG00000016190	Coq9	1699	295	0.9547	48.5852	594	0.9894	89.3728	453	0.9747	72.4922	701	0.9782	101.56	484	0.9965	79.5452	534	0.9741	79.4093	534	0.9888	78.2348	580	0.96	88.1099	500	0.9859	76.7997	557	0.9971	87.0704	614	0.9976	101.49	500	0.9823	84.4214
ENSRNOG00000003537	Spta1	7251	294	0.7338	11.3455	374	0.8574	13.1852	202	0.6743	7.57426	666	0.9443	22.6086	457	0.8938	17.5987	322	0.7722	11.2197	116	0.5329	3.9821	116	0.479	4.12905	116	0.4824	4.17487	504	0.92	18.4604	552	0.9306	21.3791	363	0.8395	14.361
ENSRNOG00000010958	Prdx3	1411	294	0.8561	58.3036	816	0.9943	147.834	661	0.9837	127.368	181	0.9093	31.5755	180	0.9405	35.6211	181	0.9752	32.4097	661	0.9929	116.608	772	0.9731	141.215	734	0.9837	135.754	690	0.9717	129.877	775	0.9865	154.25	692	0.9901	140.687
ENSRNOG00000004904	Pa2g4	1573	294	0.8805	52.2991	369	0.9911	59.9667	315	0.9866	54.4463	341	0.9701	53.361	272	0.9631	48.2839	328	0.9784	52.6828	323	0.9631	51.1124	321	0.9752	52.6704	291	0.9866	48.2778	279	0.9638	47.1069	320	0.9701	57.1308	274	0.9828	49.9687
ENSRNOG00000015020	Idh1	2161	294	0.901	38.0687	626	0.9639	74.0511	529	0.9653	66.556	215	0.9412	24.4896	215	0.9181	27.7809	215	0.9648	25.1366	682	0.9653	78.5564	635	0.9685	75.8419	553	0.9658	66.7811	676	0.9653	83.0808	695	0.9843	90.319	516	0.9815	68.4969
ENSRNOG00000031778	Mef2d	2137	294	0.854	38.4962	225	0.8741	26.9147	141	0.8474	17.9391	301	0.9247	34.6705	196	0.9247	25.6102	194	0.8821	22.9362	228	0.949	26.5572	247	0.9008	29.832	201	0.8648	24.5456	198	0.8825	24.6076	220	0.9336	28.9113	190	0.8966	25.505
ENSRNOG00000003495	Prpf8	7246	294	0.6604	11.3534	440	0.8076	15.5227	297	0.7012	11.1441	540	0.8563	18.344	366	0.82	14.1041	386	0.8358	13.459	425	0.7884	14.5997	458	0.8921	16.3139	422	0.8585	15.1984	425	0.8028	15.5776	423	0.8	16.3942	369	0.8195	14.6084
ENSRNOG00000014948	Osgin1	1984	294	0.9778	41.4649	440	0.9934	56.6922	289	0.9859	39.6043	435	0.9904	53.9692	285	0.9899	40.1112	208	0.9909	26.4878	418	0.9899	52.4429	379	0.9909	49.3046	283	0.9889	37.2244	31	0.5469	4.14982	31	0.4909	4.38803	31	0.5756	4.48225
ENSRNOG00000020607	Bckdha	1662	294	0.9699	49.4984	707	0.9862	108.743	550	0.9705	89.9742	644	0.9801	95.3791	530	0.9759	89.0445	661	0.988	100.483	503	0.9801	75.3337	608	0.9922	94.4197	621	0.9868	97.5087	478	0.9838	76.3846	634	0.9928	107.129	605	0.9838	104.424
ENSRNOG00000010218	Eif5	3499	293	0.6388	23.4314	575	0.8097	42.0084	390	0.8105	30.3045	590	0.8059	41.5056	465	0.8059	37.1083	518	0.7979	37.4032	563	0.8074	40.0513	570	0.8025	42.0457	388	0.7868	28.9382	589	0.8059	44.7075	596	0.8045	47.8356	394	0.7988	32.3019
ENSRNOG00000009252	Poldip2	1773	292	0.9334	46.0839	510	0.987	73.5315	459	0.9977	70.3867	551	0.9865	76.4964	468	0.9876	73.7054	514	0.9932	73.245	454	0.9972	63.7381	532	0.9882	77.445	527	0.9961	77.5684	414	0.9972	62.0155	569	0.9853	90.1266	473	0.9921	76.5294
ENSRNOG00000036832	Itga5	4394	292	0.7763	18.5951	407	0.8703	23.6781	259	0.8302	16.026	406	0.898	22.7439	338	0.848	21.4792	303	0.833	17.4223	394	0.8705	22.3197	358	0.8621	21.0287	310	0.8903	18.4113	346	0.8732	20.9134	373	0.8878	23.8395	282	0.8316	18.4105
ENSRNOG00000013090	Gadd45g	1073	292	0.9497	76.148	697	0.9814	166.052	372	0.9767	94.2605	125	0.9273	28.6753	125	0.9432	32.5291	125	0.9497	29.4329	613	0.9814	142.204	491	0.9832	118.106	329	0.9581	80.0164	527	0.986	130.443	639	0.9748	167.244	392	0.9711	104.8
ENSRNOG00000029941	Grina	1773	292	0.9301	46.0839	505	0.9836	72.8106	441	0.9741	67.6264	545	0.9611	75.6634	415	0.969	65.3584	503	0.9622	71.6775	476	0.9718	66.8268	485	0.9628	70.603	509	0.9616	74.919	395	0.987	59.1694	494	0.9803	78.247	474	0.9515	76.6912
ENSRNOG00000016984	Atg13	3831	291	0.7886	21.2548	389	0.9468	25.9567	311	0.8828	22.0716	537	0.9501	34.5033	339	0.9259	24.7087	362	0.94	23.8737	395	0.9251	25.6648	384	0.9491	25.8708	383	0.9272	26.0897	403	0.94	27.9384	443	0.9426	32.4744	374	0.9614	28.005
ENSRNOG00000020804	Smarcc1	3670	291	0.6997	22.1872	286	0.9106	19.921	198	0.7907	14.6685	364	0.9079	24.4137	315	0.8673	23.9666	265	0.8272	18.2433	273	0.8736	18.5161	282	0.8733	19.8323	264	0.873	18.7724	301	0.9041	21.7826	324	0.9068	24.7929	244	0.8313	19.0722
ENSRNOG00000003234	Mgrn1	2261	290	0.9239	35.8899	408	0.9743	46.1288	312	0.9659	37.5181	561	0.9947	61.0746	389	0.996	48.0409	385	0.9668	43.0213	430	0.992	47.3391	435	0.9637	49.6568	411	0.9973	47.4378	383	0.9863	44.9891	407	0.9894	50.5526	350	0.9889	44.4062
ENSRNOG00000012524	Zfp91	4886	289	0.7542	16.5508	373	0.8723	19.515	362	0.8946	20.1438	454	0.9357	22.8718	358	0.8696	20.4593	430	0.8958	22.2351	379	0.8848	19.308	424	0.904	22.3977	354	0.8932	18.9074	437	0.9204	23.754	422	0.9024	24.2554	339	0.8702	19.9032
ENSRNOG00000000894	Fry	10200	289	0.618	7.92817	307	0.6565	7.69397	235	0.5511	6.26404	495	0.8097	11.9455	326	0.6826	8.92441	277	0.6162	6.86125	402	0.7702	9.81021	320	0.691	8.0973	307	0.678	7.85455	402	0.7672	10.4673	356	0.6752	9.80165	311	0.6615	8.74654
ENSRNOG00000016386	Ptms	1126	289	0.9085	71.8182	279	0.9458	63.34	263	0.944	63.5044	328	0.9689	71.7024	210	0.9414	52.0766	313	0.9778	70.2311	274	0.9707	60.571	235	0.9645	53.8666	355	0.9822	82.276	275	0.984	64.8639	283	0.9689	70.5825	250	0.8828	63.6909
ENSRNOG00000009889	Pgm1	2280	289	0.9803	35.4681	480	0.9943	53.8169	412	0.9974	49.1302	569	0.9991	61.4293	449	0.9877	54.9887	467	0.9899	51.7494	427	0.9925	46.6171	550	0.9829	62.2613	485	0.9982	55.5124	442	0.9969	51.4869	602	0.9978	74.15	414	0.986	52.0885
ENSRNOG00000015642	Pabpc4	2611	289	0.573	30.9718	566	0.6124	55.4143	507	0.5975	52.7944	620	0.5925	58.4498	479	0.6086	51.226	611	0.6097	59.1232	493	0.6097	46.9994	557	0.6005	55.0603	598	0.6178	59.7692	299	0.5825	30.414	323	0.6051	34.7412	306	0.5906	33.6194
ENSRNOG00000001070	Cdk2ap1	1226	288	0.8312	65.7321	288	0.8883	60.0502	284	0.8809	62.9817	71	0.7675	14.255	71	0.6794	16.1707	71	0.7651	14.6316	217	0.876	44.0577	253	0.8728	53.2624	292	0.8989	62.1549	249	0.8303	53.9409	229	0.8695	52.4559	298	0.8744	69.7271
ENSRNOG00000031934	Enah	1974	288	0.8191	40.8245	498	0.9129	64.4903	306	0.8946	42.1464	523	0.9422	65.2158	406	0.9367	57.4303	405	0.9154	51.836	544	0.9179	68.5968	494	0.9083	64.5907	467	0.9422	61.738	465	0.9265	62.5626	466	0.9392	66.2961	378	0.8825	54.9314
ENSRNOG00000015072	Ptgr1	1136	288	0.9472	70.9397	629	0.9674	141.542	476	0.9886	113.924	527	0.9815	114.191	507	0.9701	124.621	541	0.9683	120.321	485	0.9683	106.271	591	0.9701	134.276	487	0.9798	111.875	29	0.7262	6.77998	29	0.5977	7.16917	29	0.6417	7.32311
ENSRNOG00000006991	Adrm1	1446	288	0.9481	55.7313	377	0.9751	66.6477	285	0.9979	53.5874	340	0.9924	57.8774	251	0.9876	48.4694	349	0.9855	60.979	332	0.9661	57.1508	346	0.9979	61.7587	344	0.9931	62.0831	319	0.9876	58.5911	373	0.9924	72.4419	338	0.9827	67.054
ENSRNOG00000011627	ZFR	4527	287	0.78	17.7397	500	0.9441	28.234	329	0.8829	19.7593	504	0.9136	27.4043	419	0.9194	25.8444	376	0.9328	20.9846	464	0.9324	25.5129	467	0.9172	26.6254	388	0.903	22.3668	477	0.9099	27.9845	477	0.9408	29.5908	317	0.8865	20.0874
ENSRNOG00000019456	Kars	2142	285	0.9113	37.2306	432	0.9743	51.5557	382	0.9832	48.4876	458	0.9743	52.6313	360	0.9841	46.9294	425	0.9809	50.1294	411	0.957	47.7611	398	0.9949	47.9572	501	0.9879	61.0381	347	0.9767	43.0248	415	0.9916	54.4099	379	0.9888	50.757
ENSRNOG00000003815	Slc25a11	1535	284	0.9967	51.7708	765	0.9941	127.399	673	0.9922	119.205	687	0.9993	110.166	611	0.9928	111.146	739	0.9948	121.635	106	0.9694	17.189	106	0.9153	17.8233	106	0.9655	18.0211	576	0.9922	99.6605	796	0.998	145.631	652	0.9954	121.847
ENSRNOG00000016937	Mtfr1l	1842	284	0.9528	43.1424	586	0.9913	81.3243	485	0.9935	71.5877	636	0.9929	84.9896	419	0.9935	63.5165	540	0.9913	74.0675	514	0.9891	69.4586	509	0.9935	71.3212	559	0.9978	79.1964	536	0.9962	77.283	542	0.9929	82.634	488	0.9902	75.9987
ENSRNOG00000050044	PTP4A2	1197	283	0.9056	66.1557	332	0.9833	70.9016	243	0.9967	55.1949	362	0.985	74.4411	301	0.9507	70.2157	303	0.9866	63.9546	303	0.9758	63.0087	294	0.9708	63.3933	273	0.9916	59.5184	306	0.985	67.8948	365	0.9632	85.6343	284	0.99	68.0613
ENSRNOG00000002669	Cluh	4050	283	0.8681	19.5527	315	0.9	19.8823	233	0.8556	15.6418	459	0.982	27.8969	321	0.9449	22.1316	282	0.9022	17.5921	325	0.921	19.9747	331	0.9509	21.0942	359	0.963	23.1325	296	0.9472	19.4109	299	0.9153	20.7332	260	0.8951	18.416
ENSRNOG00000026260	Rpl11	595	282	0.9261	132.619	624	0.9899	268.089	769	0.9933	351.395	536	0.9798	221.741	470	0.9832	220.568	914	0.9899	388.108	475	0.9866	198.714	540	0.9849	234.243	745	0.9899	326.755	506	0.995	225.862	565	0.9765	266.674	682	0.9731	328.809
ENSRNOG00000017708	-	1068	282	0.9757	73.8845	339	0.9869	81.141	281	0.9878	71.5355	388	0.971	89.4249	290	0.9803	75.8209	344	0.9906	81.3787	357	0.9775	83.205	338	0.986	81.6838	337	0.9831	82.3458	277	0.9775	68.8839	293	0.9766	77.0452	311	0.971	83.5344
ENSRNOG00000002940	Ankrd17	10084	282	0.5409	7.82513	336	0.657	8.51763	224	0.5492	6.03951	435	0.7021	10.6183	320	0.6337	8.86093	272	0.6182	6.8149	396	0.7031	9.77495	370	0.6828	9.4702	302	0.6396	7.81551	371	0.6745	9.77125	358	0.6612	9.9701	276	0.5978	7.85149
ENSRNOG00000010452	Cycs	1242	281	0.6965	63.3082	1379	0.806	283.828	1573	0.8132	344.345	583	0.8003	115.543	517	0.8035	116.233	764	0.8003	155.416	1131	0.8068	226.67	1249	0.8076	259.556	1734	0.8068	364.343	1052	0.8052	224.959	1364	0.8084	308.42	1454	0.8068	335.829
ENSRNOG00000017895	Eno1	1743	281	0.2163	45.1112	318	0.2364	46.6382	280	0.2197	43.6764	254	0.226	35.8703	237	0.214	37.9676	263	0.2392	38.1225	224	0.214	31.9892	272	0.2301	40.2774	265	0.2197	39.6763	262	0.2065	39.9221	289	0.2272	46.5639	250	0.2146	41.1451
ENSRNOG00000009152	Caprin1	3288	281	0.882	23.9139	456	0.9805	35.4524	347	0.9541	28.6935	486	0.9775	36.3833	356	0.9446	30.2329	427	0.9605	32.811	417	0.9568	31.5687	448	0.9687	35.1671	402	0.9577	31.9064	400	0.9535	32.31	423	0.9559	36.1292	376	0.9662	32.8044
ENSRNOG00000013741	Ube2d3	1875	281	0.7456	41.9353	803	0.9856	109.478	681	0.9787	98.7489	536	0.9707	70.3658	479	0.9808	71.334	539	0.9883	72.6291	152	0.8848	20.1788	158	0.9056	21.7493	170	0.9131	23.6609	95	0.7819	13.4565	98	0.7701	14.6782	98	0.7445	14.9934
ENSRNOG00000015236	Mybbp1a	4035	280	0.7467	19.4173	344	0.8808	21.7935	279	0.853	18.7995	414	0.9299	25.2554	299	0.8491	20.6914	333	0.9061	20.8509	328	0.8944	20.234	375	0.8981	23.9871	385	0.917	24.9	303	0.887	19.9438	375	0.8778	26.0998	307	0.8937	21.8258
ENSRNOG00000008015	Fos	1589	280	0.9792	49.3071	471	0.9918	75.7721	256	0.9912	43.8029	266	0.9855	41.2056	253	0.9862	44.4589	168	0.9855	26.7121	309	0.9912	48.4046	295	0.988	47.9169	160	0.9874	26.2772	326	0.9893	54.4882	388	0.988	68.5736	244	0.9912	44.0496
ENSRNOG00000023529	Rpl5	1069	280	0.6361	73.2918	580	0.6941	138.696	590	0.6932	150.059	550	0.6773	126.644	447	0.6866	116.759	719	0.7044	169.932	482	0.6876	112.233	498	0.681	120.238	619	0.7016	151.111	453	0.6819	112.546	583	0.6904	153.158	529	0.7007	141.956
ENSRNOG00000006816	Ubr5	7914	280	0.6948	9.90005	384	0.8055	12.4036	273	0.7013	9.37893	571	0.8936	17.7598	372	0.8282	13.1253	334	0.7761	10.6629	445	0.8373	13.9964	449	0.812	14.6434	335	0.7774	11.0467	482	0.8572	16.1756	452	0.8289	16.0395	319	0.7885	11.563
ENSRNOG00000015049	Scn5a	8445	280	0.6442	9.27756	355	0.7461	10.7459	255	0.6696	8.2097	438	0.8188	12.7665	305	0.7391	10.0847	371	0.7749	11.0994	358	0.7987	10.552	359	0.7699	10.972	404	0.8041	12.4843	356	0.8198	11.1959	356	0.8092	11.8386	307	0.7544	10.4283
ENSRNOG00000020451	Cd81	1440	279	0.991	54.2147	700	0.9889	124.265	598	0.9931	112.908	730	0.9938	124.784	601	0.9889	116.54	650	0.991	114.044	650	0.9889	112.358	698	0.9931	125.107	705	0.9986	127.764	605	0.9896	111.584	736	0.9903	143.537	609	0.9903	121.32
ENSRNOG00000030124	Ptpn11	5526	279	0.8223	14.1276	542	0.9548	25.0727	405	0.9441	19.9265	437	0.93	19.4656	299	0.8742	15.1085	318	0.8625	14.5392	538	0.9502	24.2339	555	0.9801	25.9222	494	0.941	23.3292	49	0.3219	2.35502	49	0.3393	2.4902	49	0.3462	2.54367
ENSRNOG00000015588	Nol3	1533	279	0.9139	50.9257	332	0.9439	55.3615	304	0.9269	53.916	336	0.9948	53.9505	269	0.8865	48.9973	335	0.9374	55.2111	290	0.9354	47.0878	332	0.9589	55.8967	291	0.9387	49.5375	289	0.9791	50.0685	306	0.9393	56.0568	275	0.9263	51.4596
ENSRNOG00000005480	Ybx3	1757	278	0.6164	44.2739	350	0.8566	50.9223	314	0.8816	48.5897	400	0.8503	56.0385	263	0.8019	41.7971	411	0.8736	59.1008	332	0.8776	47.0347	303	0.8907	44.5104	399	0.926	59.2631	313	0.8617	47.3131	318	0.8674	50.8282	354	0.8458	57.7973
ENSRNOG00000021317	Cct2	1903	277	0.8912	40.7302	510	0.9585	68.5084	440	0.9963	62.8638	518	0.9685	67.0022	387	0.9333	56.7851	519	0.9884	68.9052	374	0.9685	48.9198	451	0.98	61.1685	459	0.9685	62.9444	373	0.9769	52.057	495	0.9884	73.0492	416	0.9753	62.7091
ENSRNOG00000015018	Pdia3	2714	277	0.6912	28.5591	600	0.8069	56.5137	517	0.8099	51.7925	616	0.8106	55.8688	567	0.8191	58.3358	627	0.8106	58.3689	507	0.7881	46.4997	624	0.7027	59.3424	571	0.8386	54.9047	42	0.3552	4.11006	42	0.4882	4.34599	42	0.4171	4.43931
ENSRNOG00000016592	Gnai2	2203	277	0.8675	35.1836	403	0.9614	46.763	343	0.9478	42.3317	387	0.9224	43.2409	321	0.9682	40.6867	373	0.9315	42.7777	374	0.9251	42.258	346	0.9673	40.537	411	0.9719	48.6867	248	0.9265	29.8983	385	0.9496	49.079	340	0.936	44.2731
ENSRNOG00000005096	Bzw2	1843	277	0.9414	42.0562	779	0.9707	108.05	649	0.9642	95.7427	720	0.974	96.1624	623	0.9647	94.3897	750	0.9658	102.816	600	0.9598	81.036	759	0.9609	106.294	684	0.9506	96.8532	651	0.9577	93.8133	842	0.9761	128.303	656	0.9832	102.107
ENSRNOG00000024616	Tsc22d4	1635	276	0.3205	47.2353	162	0.3107	25.3285	178	0.3223	29.5998	189	0.3211	28.4539	121	0.3119	20.6647	194	0.326	29.9783	162	0.2569	24.6632	140	0.2624	22.1004	175	0.3309	27.9321	157	0.2924	25.503	126	0.3199	21.6422	167	0.2869	29.3005
ENSRNOG00000018404	Aars	3363	276	0.898	22.9645	546	0.972	41.5028	370	0.9322	29.9131	602	0.9792	44.0624	495	0.975	41.0999	490	0.9771	36.8123	553	0.9738	40.9308	544	0.9652	41.7506	442	0.9712	34.2988	509	0.9673	40.1976	609	0.9726	50.8557	452	0.9691	38.5556
ENSRNOG00000027487	Trim28	2969	275	0.7518	25.9178	429	0.8963	36.9368	294	0.8542	26.923	444	0.9114	36.8104	325	0.836	30.5658	332	0.87	28.2521	352	0.8811	29.5111	347	0.8697	30.1654	383	0.8882	33.6645	364	0.8663	32.5612	420	0.9158	39.7272	273	0.8633	26.3772
ENSRNOG00000050519	Rhoa	1834	275	0.8097	41.9574	685	0.9417	95.478	642	0.9024	95.1748	729	0.9237	97.8422	591	0.9471	89.9809	692	0.9504	95.3301	626	0.9509	84.9625	628	0.9204	88.3793	726	0.9258	103.305	631	0.9264	91.3774	696	0.9651	106.576	612	0.9155	95.7256
ENSRNOG00000021170	Plekho1	1452	274	0.8912	52.8031	220	0.9332	38.7318	268	0.9353	50.1828	311	0.9346	52.722	217	0.927	41.7307	263	0.9435	45.7628	228	0.9187	39.0859	199	0.9174	35.3734	273	0.9298	49.0658	241	0.9236	44.0818	273	0.9118	52.8014	230	0.8691	45.4399
ENSRNOG00000003625	Ubxn4	2297	274	0.9321	33.3783	444	0.9721	49.4122	354	0.9617	41.9014	388	0.9321	41.5785	334	0.9547	40.602	346	0.9782	38.0574	373	0.9504	40.4203	414	0.983	46.5189	303	0.9486	34.4243	372	0.9425	43.0121	404	0.9617	49.3935	324	0.946	40.4632
ENSRNOG00000021314	Fdft1	3158	274	0.8391	24.278	383	0.9449	31.0026	297	0.8952	25.57	477	0.9329	37.1796	319	0.9503	28.2059	351	0.943	28.0814	356	0.8775	28.0602	363	0.9107	29.6678	366	0.9164	30.2449	26	0.3091	2.1866	26	0.3103	2.31212	26	0.3122	2.36177
ENSRNOG00000014641	Rpl3l	1336	274	0.9528	57.3878	557	0.9873	106.576	567	0.9903	115.389	479	0.9551	88.2525	430	0.9895	89.8719	587	0.9693	111.008	433	0.9918	80.674	476	0.988	91.9583	625	0.9933	122.083	420	0.9536	83.4933	519	0.9918	109.096	513	0.9416	110.151
ENSRNOG00000039902	Lbh	2417	272	0.9214	31.4896	511	0.9644	54.0451	485	0.9673	54.5571	531	0.9652	54.0774	472	0.9735	54.529	578	0.969	60.4192	422	0.9512	43.4598	613	0.9632	65.4597	607	0.9806	65.5383	415	0.9545	45.6016	603	0.976	70.0632	484	0.9611	57.444
ENSRNOG00000007495	Smpx	882	271	0.9014	85.9757	674	0.9263	195.346	779	0.9569	240.135	615	0.958	171.635	569	0.9603	180.138	920	0.983	263.538	567	0.983	160.017	644	0.9512	188.455	848	0.9603	250.906	544	0.9478	163.81	739	0.9512	235.302	751	0.9943	244.257
ENSRNOG00000008079	Ugp2	2113	271	0.9394	35.8876	645	0.9981	78.0319	447	0.9763	57.5168	818	0.982	95.291	584	0.9943	77.1748	496	0.9754	59.307	654	0.9796	77.0425	602	0.9967	73.5338	460	0.9844	56.8122	646	0.9801	81.1974	596	0.9811	79.2129	421	0.9465	57.1556
ENSRNOG00000002755	Pafah1b1	4363	271	0.6328	17.3804	448	0.8719	26.2485	343	0.8325	21.3745	537	0.8882	30.2961	416	0.8719	26.6238	430	0.895	24.9004	456	0.895	26.0155	470	0.9037	27.8037	432	0.8584	25.8393	437	0.9118	26.6014	499	0.9131	32.1192	366	0.8989	24.0642
ENSRNOG00000047656	Gaa	3365	271	0.8481	22.5351	429	0.986	32.59	286	0.9117	23.1083	75	0.6591	5.48623	75	0.6707	6.22355	75	0.6371	5.63118	370	0.951	27.3696	413	0.9866	31.6778	358	0.9551	27.7639	353	0.9545	27.8611	460	0.9744	38.3903	359	0.9694	30.6045
ENSRNOG00000006224	Klhl31	6166	270	0.7078	12.2528	417	0.9019	17.288	282	0.7721	12.4346	523	0.911	20.8784	427	0.8548	19.3369	357	0.8469	14.6281	464	0.8698	18.7312	471	0.8865	19.7155	371	0.8902	15.7019	436	0.8649	18.7798	501	0.9074	22.8183	328	0.8138	15.2597
ENSRNOG00000037264	Hcfc1	9128	269	0.5814	8.24616	229	0.6293	6.41316	175	0.537	5.21253	363	0.7901	9.78879	275	0.6449	8.41239	215	0.5631	5.95095	297	0.6587	8.09903	320	0.6982	9.04825	252	0.6409	7.20457	278	0.683	8.08869	242	0.6125	7.44542	230	0.6449	7.22817
ENSRNOG00000013211	Chchd3	1504	268	0.9668	49.8611	480	0.9927	81.5841	530	0.9967	95.8108	485	0.9973	79.3765	457	0.998	84.8458	653	0.9934	109.695	446	0.9854	73.8141	451	0.9953	77.3961	601	0.998	104.282	441	0.9794	77.8753	509	0.9967	95.0428	470	0.996	89.645
ENSRNOG00000020527	Drap1	1406	268	0.5619	53.3365	314	0.7347	57.0895	284	0.692	54.9186	280	0.7688	49.0197	267	0.6906	53.0259	291	0.6885	52.2915	291	0.7752	51.5181	282	0.7539	51.7671	258	0.7418	47.887	245	0.83	46.2796	264	0.7333	52.7312	220	0.7063	44.8863
ENSRNOG00000018566	Ctsl1	1383	268	0.9284	54.2235	613	0.9877	113.305	742	0.9906	145.871	91	0.8836	16.1964	91	0.893	18.3731	91	0.9074	16.6243	580	0.9877	104.39	599	0.9892	111.788	709	0.9877	133.785	550	0.9877	105.621	633	0.9877	128.538	747	0.9877	154.944
ENSRNOG00000011589	Camk2d	4762	268	0.7375	15.7478	562	0.8205	30.1689	373	0.8007	21.2964	640	0.8591	33.0818	456	0.8114	26.7385	474	0.8259	25.1485	626	0.8335	32.7218	565	0.8717	30.6231	423	0.8324	23.1811	572	0.8557	31.9018	526	0.8387	31.0203	390	0.7894	23.4937
ENSRNOG00000016692	Hsdl2	2006	267	0.8853	37.2439	572	0.9661	72.8916	444	0.9586	60.1781	577	0.9716	70.8016	526	0.9526	73.2178	540	0.9831	68.0121	85	0.7881	10.5473	85	0.817	10.9365	80	0.7787	10.4074	413	0.9736	54.6799	628	0.9741	87.918	458	0.9721	65.4954
ENSRNOG00000020014	Myh14	6443	267	0.768	11.5957	486	0.9267	19.2824	366	0.8698	15.4447	631	0.962	24.1068	422	0.9059	18.2889	468	0.9094	18.3519	487	0.9122	18.8145	491	0.9271	19.6691	510	0.9202	20.6569	465	0.9067	19.1679	618	0.9474	26.937	396	0.9053	17.6312
ENSRNOG00000008140	Rpl15	714	266	0.7871	104.246	411	0.7969	147.148	508	0.7997	193.443	407	0.7983	140.312	316	0.7899	123.581	532	0.7941	188.251	339	0.7969	118.183	335	0.7843	121.098	479	0.7899	175.073	356	0.7815	132.422	353	0.7899	138.844	446	0.7927	179.19
ENSRNOG00000008629	Secisbp2l	4522	266	0.7404	16.4599	256	0.8773	14.4718	158	0.7435	9.49977	355	0.9509	19.324	254	0.9038	15.6843	240	0.8492	13.4092	318	0.9153	17.5045	266	0.8739	15.1824	197	0.818	11.3689	304	0.8852	17.8547	296	0.9235	18.3827	196	0.8036	12.4337
ENSRNOG00000006130	Rab5b	3258	266	0.8189	22.8458	341	0.9184	26.7556	250	0.8831	20.8629	394	0.9082	29.7676	329	0.9076	28.1973	309	0.88	23.9624	358	0.9061	27.3517	367	0.9036	29.074	330	0.8993	26.433	320	0.9291	26.086	321	0.9184	27.6696	264	0.8858	23.245
ENSRNOG00000031802	MP68	563	265	0.5968	131.708	569	0.8366	258.354	759	0.8313	366.539	446	0.8401	194.996	477	0.7247	236.577	900	0.8135	403.885	413	0.8419	182.597	518	0.7709	237.472	694	0.8171	321.687	455	0.7318	214.641	579	0.7904	288.815	689	0.8384	351.064
ENSRNOG00000003597	Tuba4a	1448	265	0.9309	51.2097	318	0.9669	56.1398	250	0.9972	46.9416	360	0.9786	61.1973	261	0.9593	50.3308	314	0.9848	54.7879	320	0.9972	55.009	279	0.991	49.7309	342	0.9682	61.6369	339	0.9724	62.1785	329	0.9965	63.8082	229	0.9606	45.3673
ENSRNOG00000007971	Wbp2	793	265	0.9672	93.5078	160	0.9937	51.5773	120	0.9937	41.1429	223	0.9962	69.2197	151	0.9912	53.1699	120	0.9773	38.2324	188	0.9975	59.0115	185	0.9962	60.2128	165	0.9874	54.2992	153	0.9836	51.2421	169	0.9887	59.8498	115	0.9836	41.6007
ENSRNOG00000008063	Hibadh	1749	264	0.9388	42.2366	689	0.9851	100.703	521	0.98	80.9906	676	0.992	95.1382	627	0.9983	100.101	623	0.98	89.9957	555	0.9691	78.987	602	0.9949	88.8376	595	0.9703	88.779	569	0.9726	86.4035	615	0.9863	98.7494	551	0.9823	90.3728
ENSRNOG00000017127	RGD1565183	504	264	0.6687	146.571	342	0.7758	173.463	454	0.7738	244.913	306	0.6766	149.448	275	0.6905	152.358	427	0.6925	214.053	307	0.6905	151.621	296	0.6885	151.583	438	0.7877	226.791	279	0.6845	147.022	376	0.6885	209.511	357	0.6825	203.195
ENSRNOG00000009449	Trim35	3674	263	0.8356	20.0305	477	0.982	33.1888	370	0.9249	27.381	610	0.9967	40.8685	437	0.9665	33.2127	434	0.9736	29.8452	495	0.9763	33.5365	485	0.975	34.0716	476	0.9924	33.8104	471	0.9755	34.0479	548	0.9799	41.8881	417	0.9543	32.5591
ENSRNOG00000009102	Fermt2	3212	262	0.8639	22.8245	504	0.9791	40.1113	349	0.9701	29.5418	515	0.9633	39.4666	464	0.9633	40.3371	411	0.9742	32.3288	448	0.9664	34.718	506	0.9751	40.6598	407	0.9601	33.0675	479	0.9549	39.6067	500	0.9598	43.7163	401	0.9695	35.8133
ENSRNOG00000047179	Aplp2	3445	262	0.7965	21.2808	329	0.9498	24.4129	264	0.9196	20.8354	347	0.9231	24.7935	294	0.9385	23.8298	331	0.9527	24.2752	350	0.9524	25.289	304	0.921	22.7759	326	0.9202	24.6951	335	0.9597	25.8264	386	0.9536	31.4664	292	0.8781	24.3147
ENSRNOG00000020182	Mvp	2763	262	0.9388	26.5336	449	0.9855	41.5411	389	0.97	38.2785	527	0.9931	46.9492	354	0.9743	35.7754	401	0.9957	36.668	467	0.9917	42.0715	469	0.9884	43.8109	469	0.9953	44.2971	455	0.9834	43.736	564	0.9946	57.3254	416	0.9758	43.1905
ENSRNOG00000014289	Arpc2	1018	261	0.9322	71.7411	299	0.9479	75.082	246	0.944	65.7013	331	0.9548	80.0347	280	0.9528	76.802	273	0.9833	67.7545	275	0.9391	67.2415	244	0.944	61.8632	283	0.9528	72.5474	286	0.9754	74.6152	266	0.9273	73.3809	240	0.9823	67.63
ENSRNOG00000002618	Ivns1abp	1365	260	0.9531	53.2986	583	0.9978	109.181	528	0.9531	105.169	700	0.9905	126.23	597	0.9553	122.125	681	0.9744	126.049	561	0.978	102.302	601	0.9832	113.64	727	0.9729	138.99	562	0.9868	109.348	762	0.9993	156.773	533	0.9597	112.014
ENSRNOG00000001436	Ywhag	1604	260	0.8734	45.357	362	0.9832	57.6921	298	0.967	50.5124	454	0.9931	69.6706	326	0.9888	56.7512	330	0.9663	51.9796	400	0.9994	62.0737	397	0.985	63.8817	334	0.9931	54.3407	390	0.995	64.5757	401	0.9844	70.2084	322	0.9944	57.5874
ENSRNOG00000012723	Trim55	2653	260	0.931	27.4228	439	0.9763	42.2999	321	0.9453	32.8968	484	0.9891	44.9062	389	0.9921	40.9425	363	0.9457	34.5695	398	0.9657	37.342	459	0.9887	44.6545	411	0.98	40.4285	351	0.9849	35.1381	456	0.9778	48.2699	345	0.9793	37.3042
ENSRNOG00000000082	Hltf	4787	260	0.6376	15.198	527	0.7917	28.1423	339	0.7245	19.2541	675	0.8053	34.7087	500	0.812	29.1654	430	0.771	22.6949	547	0.7907	28.443	549	0.8521	29.6005	435	0.7802	23.7142	550	0.8053	30.5146	601	0.8325	35.2582	417	0.7859	24.989
ENSRNOG00000004107	Rpl23	517	260	0.824	140.721	552	0.9226	272.936	715	0.942	376.012	529	0.9246	251.862	449	0.8994	242.503	779	0.8897	380.689	501	0.911	241.212	549	0.8743	274.077	685	0.9207	345.767	469	0.9188	240.93	521	0.9323	283.007	650	0.9671	360.661
ENSRNOG00000002935	Ankrd40	3382	260	0.7499	21.5117	233	0.8519	17.6114	177	0.8196	14.2294	279	0.9027	20.3062	206	0.8566	17.0081	246	0.8732	18.3774	251	0.8936	18.4736	255	0.9125	19.4606	210	0.9154	16.2042	215	0.8391	16.8839	221	0.8983	18.3513	232	0.8924	19.6784
ENSRNOG00000018975	Atg9a	4083	260	0.6478	17.8184	230	0.8158	14.3999	178	0.7727	11.853	294	0.7992	17.7242	235	0.8616	16.0713	186	0.7499	11.5095	225	0.8033	13.7169	227	0.8168	14.3495	194	0.8178	12.3995	223	0.8241	14.5056	250	0.8163	17.1953	213	0.8019	14.965
ENSRNOG00000027962	Smg7	5719	258	0.6739	12.6234	269	0.823	12.0239	173	0.7061	8.22456	405	0.9407	17.4314	316	0.8397	15.4287	252	0.7772	11.1328	325	0.8692	14.1454	340	0.9054	15.3444	265	0.8299	12.0923	357	0.9096	16.579	302	0.855	14.8298	226	0.7959	11.3361
ENSRNOG00000017354	Zyx	2558	257	0.8022	28.113	270	0.8288	26.9821	269	0.8589	28.5916	360	0.8839	34.6418	258	0.8831	28.1632	311	0.8683	30.7173	337	0.8526	32.793	318	0.855	32.0861	353	0.878	36.0128	279	0.8878	28.9676	295	0.8882	32.387	270	0.8929	30.2788
ENSRNOG00000000841	Ddx39b	1684	257	0.9537	42.7038	314	0.9317	47.665	242	0.9483	39.0715	307	0.9477	44.874	229	0.946	37.9713	265	0.9424	39.7582	295	0.9252	43.6046	297	0.9662	45.5202	267	0.9477	41.3763	253	0.9626	39.9013	310	0.9311	51.6974	245	0.943	41.735
ENSRNOG00000016054	Tab2	4559	257	0.6431	15.7739	209	0.7151	11.719	136	0.6291	8.11065	286	0.7116	15.4417	210	0.6683	12.8621	186	0.6526	10.3078	254	0.7098	13.8681	228	0.6912	12.9079	191	0.6315	10.9332	251	0.719	14.6222	221	0.7144	13.6136	172	0.649	10.8227
ENSRNOG00000009681	FLOT2	2612	255	0.812	27.3176	307	0.9437	30.0454	271	0.9851	28.2087	333	0.9743	31.3812	243	0.9391	25.9774	329	0.9717	31.8234	322	0.9629	30.6856	300	0.9793	29.6441	347	0.9843	34.6688	306	0.9116	31.1141	337	0.9847	36.2331	313	0.9747	34.3754
ENSRNOG00000002610	Carhsp1	3027	255	0.6885	23.5724	217	0.8441	18.3257	277	0.8332	24.8802	305	0.9058	24.8019	209	0.8309	19.2795	304	0.9224	25.3737	273	0.8599	22.4493	257	0.8147	21.9135	320	0.8873	27.588	241	0.8566	21.1453	301	0.8728	27.9257	255	0.9009	24.1659
ENSRNOG00000030317	Apitd1	5569	254	0.5901	12.7624	283	0.6682	12.9904	204	0.5611	9.95954	413	0.8668	18.2545	261	0.7308	13.0866	262	0.6376	11.8863	337	0.7375	15.0628	299	0.7456	13.8575	290	0.6926	13.5895	337	0.7579	16.0717	347	0.7518	17.4985	255	0.627	13.1353
ENSRNOG00000017481	Sucla2	1728	254	0.9346	41.1306	852	0.9965	126.04	704	0.985	110.768	881	0.9959	125.496	748	0.9971	120.87	798	0.9959	116.676	186	0.9225	26.793	186	0.9549	27.7817	186	0.9578	28.09	720	0.9948	110.662	876	0.9948	142.367	749	0.9965	124.341
ENSRNOG00000001517	Pdk1	1579	254	0.8987	45.0118	512	0.9905	82.8896	385	0.9569	66.2926	499	0.988	77.7887	450	0.955	79.5779	415	0.9531	66.4033	70	0.7467	11.0349	70	0.8391	11.4421	70	0.7657	11.5691	402	0.9924	67.6165	458	0.9683	81.4578	422	0.993	76.6666
ENSRNOG00000005614	Txn2	1299	254	0.9438	54.7142	302	0.9615	59.4306	341	0.9623	71.3726	346	0.9777	65.564	277	0.9861	59.5433	381	0.9623	74.1036	276	0.9831	52.8874	289	0.9715	57.4221	374	0.9831	75.1355	274	0.8945	56.0209	327	0.9792	70.6949	304	0.9692	67.1337
ENSRNOG00000004245	Mgst3	529	254	0.8752	134.355	372	0.8922	179.763	412	0.8752	211.752	330	0.8752	153.552	323	0.879	170.494	441	0.8922	210.623	152	0.879	71.5221	142	0.8507	69.2824	174	0.8715	85.8374	305	0.8866	153.127	344	0.8847	182.622	396	0.879	214.741
ENSRNOG00000011175	Hnrnpa2b1	1637	253	0.7892	43.2461	682	0.9255	106.5	450	0.9047	74.7395	577	0.912	86.7612	518	0.9334	88.3574	507	0.923	78.2497	517	0.9053	78.6129	557	0.9621	87.8207	457	0.9139	72.8535	515	0.9285	83.554	655	0.9542	112.368	410	0.9157	71.8474
ENSRNOG00000002721	Ndufb4	461	253	0.603	153.566	282	0.6269	156.372	262	0.6095	154.521	230	0.6139	122.808	173	0.6074	104.787	303	0.6182	166.06	185	0.6161	99.8902	225	0.6161	125.971	281	0.6117	159.07	205	0.6009	118.103	260	0.6182	158.388	250	0.6117	155.566
ENSRNOG00000011632	Cct5	1737	253	0.9706	40.7564	607	0.9908	89.3308	594	0.9919	92.9765	535	0.9908	75.8145	482	0.9931	77.4835	709	0.9885	103.126	486	0.9965	69.6448	569	0.9948	84.5479	634	0.9971	95.2516	518	0.9914	79.2025	601	0.9942	97.1681	556	0.9965	91.8229
ENSRNOG00000019400	Dag1	2682	252	0.8606	26.2916	199	0.9284	18.9673	129	0.8117	13.0773	322	0.9672	29.5526	209	0.9258	21.7595	161	0.896	15.1667	224	0.9355	20.7894	225	0.9661	21.6528	175	0.9277	17.0279	199	0.9519	19.7062	174	0.9351	18.2196	172	0.8915	18.3969
ENSRNOG00000028103	Psmd3	2121	252	0.9312	33.2457	424	0.9618	51.1019	329	0.9661	42.1737	433	0.9684	50.2511	354	0.9623	46.6042	404	0.9764	48.1243	387	0.9618	45.4174	385	0.9783	46.8501	406	0.959	49.9538	316	0.9661	39.569	430	0.9684	56.9347	354	0.9835	47.8783
ENSRNOG00000003626	-	381	251	0.8845	184.342	717	0.8976	481.068	848	0.8976	605.142	644	0.8898	416.063	595	0.895	436.068	918	0.8976	608.753	564	0.8924	368.474	630	0.8924	426.782	915	0.895	626.728	554	0.8924	386.184	836	0.895	616.213	785	0.8924	591.045
ENSRNOG00000020715	Ddb1	3713	251	0.8718	18.9158	504	0.9591	34.6991	394	0.9464	28.8508	684	0.986	45.345	486	0.9607	36.5488	462	0.976	31.437	495	0.9774	33.1843	551	0.9782	38.3016	517	0.9618	36.337	502	0.9426	35.9077	641	0.9787	48.4822	443	0.9542	34.2259
ENSRNOG00000021174	Macrod1	1159	250	0.8991	60.3576	552	0.9689	121.75	580	0.9983	136.06	473	0.9689	100.456	460	0.9681	110.825	655	0.9827	142.785	484	0.9871	103.948	490	0.9879	109.12	651	0.994	146.582	412	0.9603	94.411	638	0.9965	154.592	537	0.9793	132.913
ENSRNOG00000018686	Atxn2l	4275	250	0.7258	16.3636	228	0.8533	13.6336	159	0.6812	10.1122	290	0.8709	16.6978	198	0.7654	12.9328	196	0.7509	11.5836	260	0.837	15.1387	245	0.8423	14.7918	198	0.8089	12.0868	239	0.7932	14.8481	204	0.7513	13.4012	188	0.7829	12.6153
ENSRNOG00000016911	Tmbim6	1203	249	0.818	57.9174	350	0.8662	74.3729	276	0.8529	62.3778	378	0.852	77.3436	284	0.8404	65.9196	349	0.8662	73.2965	356	0.8495	73.6608	344	0.8612	73.8045	319	0.8396	69.2003	294	0.8778	64.9069	373	0.8653	87.0748	255	0.8562	60.8066
ENSRNOG00000026754	Usp47	5673	248	0.6801	12.2325	507	0.8932	22.8458	273	0.7869	13.0839	615	0.9235	26.6846	470	0.9043	23.1338	378	0.8373	16.8346	507	0.8666	22.2458	522	0.9002	23.7491	416	0.8593	19.1365	533	0.8962	24.953	562	0.9015	27.821	321	0.8371	16.2319
ENSRNOG00000015434	Midn	1725	248	0.902	40.2289	187	0.9299	27.7118	111	0.8359	17.4953	232	0.9368	33.1053	172	0.9501	27.8421	155	0.9061	22.7021	199	0.9345	28.7155	191	0.9067	28.5782	194	0.9507	29.3492	169	0.8962	26.02	187	0.9212	30.444	140	0.902	23.2817
ENSRNOG00000010768	Kpna4	3449	247	0.6776	20.0391	441	0.8965	32.6857	294	0.8994	23.1761	486	0.9037	34.685	374	0.9136	30.2789	409	0.9095	29.9608	441	0.9142	31.8271	402	0.9098	30.0831	375	0.9026	28.374	416	0.9211	32.0338	437	0.909	35.5826	341	0.9072	28.362
ENSRNOG00000011659	Alpk3	5055	247	0.8311	13.6726	284	0.9159	14.3618	227	0.8408	12.2093	442	0.9422	21.5228	303	0.8688	16.7372	321	0.9389	16.0438	372	0.9294	18.3178	336	0.9215	17.1557	336	0.9011	17.3461	353	0.9234	18.5465	385	0.9577	21.3889	282	0.8942	16.0031
ENSRNOG00000006364	Dld	2261	247	0.8784	30.5683	850	0.9651	96.1016	691	0.9425	83.0929	605	0.9664	65.8647	537	0.9496	66.3187	635	0.9628	70.9572	722	0.9721	79.4857	816	0.9721	93.1494	784	0.9677	90.4896	117	0.8275	13.7434	126	0.8545	15.6502	95	0.789	12.0531
ENSRNOG00000027149	Rpl10	765	246	0.9255	89.9806	786	0.9608	262.647	964	0.9739	342.612	791	0.9503	254.515	627	0.9647	228.859	1050	0.9438	346.778	666	0.9346	216.703	681	0.9529	229.761	948	0.9699	323.392	631	0.9333	219.067	690	0.9556	253.301	780	0.9242	292.489
ENSRNOG00000009271	Smarca4	5568	246	0.7753	12.3626	365	0.8913	16.7574	237	0.7953	11.5727	355	0.9174	15.6938	314	0.8795	15.7468	311	0.8944	14.1119	398	0.8913	17.7925	377	0.9045	17.4756	322	0.8985	15.0918	339	0.8824	16.17	413	0.9122	20.8305	272	0.8378	14.0135
ENSRNOG00000007706	Prkaa2	2652	246	0.9057	25.9559	224	0.9619	21.5917	114	0.8326	11.6874	419	0.986	38.8901	272	0.9732	28.639	174	0.865	16.5767	268	0.9593	25.1544	281	0.9706	27.3478	193	0.914	18.9918	286	0.9755	28.6419	249	0.9604	26.3679	177	0.9114	19.1459
ENSRNOG00000031396	Grb14	1946	246	0.8756	35.3726	462	0.9507	60.6892	387	0.9394	54.0698	514	0.9538	65.0157	420	0.906	60.2655	445	0.946	57.7751	413	0.9142	52.8274	429	0.8905	56.899	403	0.9358	54.0437	449	0.9327	61.2791	497	0.9471	71.7237	385	0.9116	56.7537
ENSRNOG00000036806	Psme3	4914	245	0.1068	13.951	229	0.1162	11.9128	172	0.1368	9.51656	270	0.1471	13.5247	221	0.1195	12.558	207	0.1526	10.6429	227	0.1408	11.4985	215	0.1294	11.2926	207	0.1453	10.993	192	0.1197	10.3771	227	0.127	12.973	187	0.1331	10.9165
ENSRNOG00000011413	Scp2	2598	244	0.6721	26.28	768	0.9661	75.5674	588	0.8984	61.5354	638	0.9411	60.4477	644	0.9276	69.2164	713	0.9484	69.3384	584	0.9069	55.9533	701	0.9557	69.6417	627	0.9119	62.9813	48	0.4257	4.90694	48	0.4877	5.18861	48	0.4265	5.30003
ENSRNOG00000008949	Synpo2l	2937	244	0.8703	23.2467	175	0.9285	15.2316	142	0.8893	13.1453	258	0.9578	21.6229	170	0.9122	16.1624	208	0.9162	17.893	245	0.8917	20.7642	219	0.9639	19.2456	214	0.9499	19.0148	199	0.9139	17.9953	215	0.9115	20.5581	170	0.9261	16.6043
ENSRNOG00000018273	Ncl	2395	244	0.4948	28.5075	566	0.5307	60.412	381	0.5324	43.252	589	0.5324	60.5352	476	0.5353	55.4962	535	0.5311	56.438	490	0.5228	50.9264	616	0.5399	66.3843	438	0.5253	47.7256	527	0.5311	58.4405	651	0.5386	76.3352	423	0.5332	50.6653
ENSRNOG00000007673	Ppig	3923	244	0.5702	17.4039	287	0.7061	18.7015	179	0.6311	12.4057	68	0.4073	4.26667	68	0.4104	4.84008	68	0.4247	4.37939	272	0.7326	17.2585	279	0.6602	18.3559	203	0.6967	13.5039	266	0.6373	18.0083	318	0.6605	22.7645	209	0.6829	15.2828
ENSRNOG00000002277	Ncor1	5001	243	0.6703	13.5964	268	0.7177	13.699	185	0.5891	10.0578	334	0.7171	16.4395	252	0.6813	14.0704	220	0.7277	11.1145	287	0.7219	14.2849	286	0.7451	14.7604	223	0.6437	11.6367	296	0.7574	15.7197	288	0.7295	16.1728	208	0.5401	11.9312
ENSRNOG00000000521	Cdkn1a	1873	243	0.9087	36.3031	411	0.9589	56.094	291	0.9552	42.2417	345	0.9103	45.3398	339	0.9653	50.5387	313	0.9381	42.2211	320	0.9562	42.527	321	0.9557	44.2341	330	0.9514	45.979	304	0.9722	43.1067	407	0.9573	61.0247	308	0.9247	47.1725
ENSRNOG00000012443	Cpt2	2296	243	0.9133	29.6149	434	0.9948	48.3203	312	0.9595	36.9462	420	0.9538	45.0273	350	0.9909	42.5655	365	0.9887	40.1647	55	0.6102	5.9627	55	0.6529	6.18274	55	0.6864	6.25135	295	0.9926	34.1239	454	0.98	55.5307	323	0.9795	40.3559
ENSRNOG00000025679	Stk40	3467	243	0.8062	19.6123	244	0.9198	17.9907	207	0.9253	16.2332	319	0.9645	22.6483	232	0.9164	18.6851	248	0.8982	18.0726	265	0.9495	19.0259	266	0.9426	19.8024	241	0.9164	18.1404	229	0.9089	17.5425	257	0.9034	20.8175	247	0.944	20.4371
ENSRNOG00000009329	Nr1d1	2308	243	0.7236	29.4609	182	0.8094	20.158	133	0.7357	15.6676	192	0.8341	20.4769	169	0.7816	20.4462	151	0.7613	16.5297	194	0.7998	20.9227	183	0.7769	20.4647	145	0.8046	16.3951	162	0.8107	18.6418	178	0.8076	21.6588	127	0.766	15.785
ENSRNOG00000018775	Cystm1	770	242	0.8182	87.9427	426	0.9922	141.427	384	0.9844	135.59	536	0.9896	171.345	393	0.9818	142.516	518	0.9883	169.966	431	0.9883	139.328	440	0.9935	147.486	411	0.9844	139.295	387	0.9922	133.484	386	0.987	140.782	354	0.9857	131.883
ENSRNOG00000018960	-	9680	242	0.5633	6.99544	326	0.6707	8.60903	232	0.6033	6.51627	351	0.6914	8.92545	300	0.657	8.65382	299	0.6874	7.80404	334	0.714	8.58862	302	0.6743	8.05234	269	0.661	7.25204	272	0.6143	7.46281	363	0.7476	10.5313	296	0.7038	8.77187
ENSRNOG00000002373	Akap1	2812	242	0.8289	24.081	253	0.9139	22.9994	175	0.861	16.9203	372	0.9328	32.5631	213	0.8652	21.1508	211	0.8624	18.9579	260	0.9043	23.015	232	0.861	21.2943	226	0.8723	20.9738	287	0.9282	27.1066	271	0.9331	27.0647	208	0.8784	21.219
ENSRNOG00000018604	Tufm	1884	241	0.836	35.7941	513	0.8508	69.6063	366	0.8471	52.8186	588	0.8471	76.8236	413	0.8689	61.2112	517	0.8471	69.3319	494	0.8625	65.2677	514	0.8572	70.4162	476	0.8535	65.9339	473	0.8514	66.679	598	0.8641	89.1394	471	0.8721	71.716
ENSRNOG00000000399	Kpna1	4946	241	0.7258	13.6345	485	0.9123	25.0669	334	0.8963	18.3603	536	0.907	26.6753	418	0.9183	23.5985	406	0.9129	20.7394	465	0.8668	23.4019	442	0.8932	23.0653	358	0.8789	18.8891	430	0.8953	23.09	465	0.8932	26.4027	312	0.8435	18.0957
ENSRNOG00000021102	Scn1b	1415	241	0.8459	47.658	409	0.9265	73.8889	364	0.9576	69.9409	399	0.8982	69.4088	332	0.9385	65.5155	421	0.9625	75.1708	364	0.9378	64.032	395	0.9689	72.0495	423	0.942	78.013	327	0.9534	61.3762	425	0.9442	84.3493	380	0.9625	77.0377
ENSRNOG00000008001	Rab3b	1141	240	0.567	58.8574	250	0.5706	56.0101	193	0.5925	45.9894	211	0.5741	45.5192	209	0.5732	51.1473	172	0.5925	38.0861	166	0.5872	36.2138	211	0.5925	47.7295	193	0.5872	44.1423	196	0.5881	45.6225	267	0.5758	65.7166	177	0.5925	44.5004
ENSRNOG00000050547	SYNGR2	1544	240	0.8543	43.495	322	0.9793	53.3115	274	0.9741	48.2492	314	0.9819	50.0588	229	0.9929	41.4143	293	0.9935	47.945	303	0.9922	48.8481	275	0.989	45.9701	288	0.9961	48.6775	257	0.9903	44.2074	316	0.9877	57.4763	310	0.9948	57.5957
ENSRNOG00000014986	Ube4b	3522	240	0.8169	19.0676	251	0.9472	18.2178	208	0.8978	16.0569	405	0.9583	28.305	295	0.9165	23.3881	245	0.9145	17.5752	317	0.9699	22.4038	307	0.9475	22.4978	266	0.9015	19.7095	280	0.9784	21.1143	289	0.9461	23.044	224	0.902	18.2446
ENSRNOG00000025764	Mt1a	389	240	0.2211	172.638	781	0.2159	513.232	543	0.2159	379.522	634	0.2159	401.179	651	0.2159	467.298	530	0.2288	344.231	645	0.2159	412.726	662	0.2288	439.237	437	0.2314	293.167	610	0.2159	416.475	694	0.2314	501.025	532	0.2159	392.318
ENSRNOG00000017510	Mfge8	2168	239	0.8976	30.8471	505	0.9234	59.5449	428	0.929	53.6749	538	0.953	61.0831	411	0.9124	52.9352	445	0.9137	51.859	472	0.9257	54.192	468	0.9576	55.7156	412	0.8879	49.5931	422	0.9193	51.6966	444	0.9179	57.5139	374	0.9091	49.4867
ENSRNOG00000009552	Serinc3	2143	239	0.7956	31.2069	277	0.9855	33.0423	263	0.9879	33.3672	380	0.9939	43.6475	268	0.9664	34.92	358	0.9729	42.207	328	0.9846	38.0982	286	0.9841	34.4456	318	0.9739	38.7247	17	0.3486	2.10686	17	0.315	2.2278	17	0.3467	2.27564
ENSRNOG00000005064	Ube2b	2094	239	0.7579	31.9372	633	0.8634	77.275	524	0.8926	68.0364	648	0.8448	76.1722	576	0.861	76.8083	690	0.9164	83.2522	581	0.9031	69.064	598	0.8801	73.708	576	0.8749	71.7842	565	0.8386	71.6606	570	0.9164	76.4447	540	0.8338	73.9764
ENSRNOG00000020889	Nucb1	2352	238	0.8861	28.3149	335	0.9991	36.4099	296	0.9422	34.2169	306	0.9639	32.0245	284	0.9579	33.7165	326	0.969	35.019	285	0.9911	30.162	301	0.9613	33.0308	328	0.9762	36.3931	260	0.9783	29.3593	286	0.9562	34.149	277	0.9702	33.7846
ENSRNOG00000010134	Acot2	2375	238	0.6236	28.0407	407	0.7954	43.8069	296	0.7655	33.8856	335	0.7781	34.72	316	0.7697	37.1523	294	0.7794	31.2757	118	0.6013	12.3672	119	0.6501	12.9322	130	0.7629	14.2844	101	0.6122	11.2945	116	0.6737	13.7165	103	0.5865	12.4408
ENSRNOG00000011052	Gars	2329	237	0.7596	28.4744	304	0.9691	33.3669	212	0.9081	24.7487	301	0.9665	31.8123	266	0.9493	31.8914	272	0.9888	29.5069	277	0.9665	29.6048	300	0.9665	33.2462	253	0.9493	28.3488	238	0.9777	27.1404	298	0.9738	35.9332	207	0.9764	25.4963
ENSRNOG00000017158	Eif4g2	4988	237	0.3204	13.2953	316	0.3833	16.1947	246	0.3815	13.409	357	0.3783	17.6173	279	0.3637	15.6185	304	0.3795	15.3982	304	0.3795	15.1705	315	0.3659	16.2995	302	0.3625	15.8002	329	0.3765	17.5178	299	0.3583	16.8343	252	0.3785	14.4927
ENSRNOG00000009977	Thrap3	3561	237	0.8509	18.6231	243	0.8441	17.444	213	0.8394	16.2628	376	0.9388	25.9905	254	0.8815	19.917	255	0.9087	18.0922	299	0.8986	20.9002	334	0.929	24.2083	262	0.9096	19.2005	305	0.9295	22.7477	297	0.8913	23.4225	230	0.8371	18.5281
ENSRNOG00000015107	Kmt2d	16545	237	0.4375	4.00827	215	0.4818	3.32188	156	0.3731	2.56356	217	0.4168	3.22843	176	0.3816	2.97035	132	0.3073	2.01572	185	0.3993	2.78328	210	0.4352	3.27599	209	0.4428	3.29657	229	0.4569	3.67602	230	0.4562	3.904	164	0.3561	2.8435
ENSRNOG00000001277	Mafk	2645	237	0.8586	25.0725	416	0.966	40.205	366	0.9887	37.622	461	0.9788	42.9016	347	0.98	36.6324	403	0.9837	38.4949	426	0.9879	40.09	390	0.9637	38.0565	448	0.9686	44.2013	382	0.9353	38.3572	447	0.9815	47.4604	336	0.9709	36.4409
ENSRNOG00000010488	Zmiz1	7539	237	0.6172	8.7965	190	0.5973	6.44246	139	0.5115	5.01288	242	0.7286	7.90132	180	0.6164	6.66685	165	0.5686	5.5296	220	0.666	7.26375	227	0.6756	7.77146	184	0.6606	6.36923	229	0.7221	8.06735	197	0.6657	7.33841	177	0.586	6.73497
ENSRNOG00000003722	Dusp27	3899	237	0.892	17.0087	343	0.9236	22.4881	246	0.8936	17.1541	469	0.9777	29.6086	419	0.9569	30.007	348	0.9382	22.5502	441	0.962	28.1538	412	0.9687	27.2731	362	0.9654	24.2292	377	0.9674	25.6801	471	0.9779	33.9248	309	0.9387	22.7343
ENSRNOG00000003546	Tnfrsf12a	967	237	0.9607	68.5799	556	0.9659	146.981	430	0.969	120.901	524	0.9679	133.384	451	0.9669	130.23	472	0.971	123.322	451	0.9648	116.092	505	0.97	134.789	389	0.9576	104.98	455	0.9555	124.967	453	0.9586	131.559	340	0.9741	100.862
ENSRNOG00000048915	Twf2	1582	237	0.8982	41.9196	531	0.9077	85.8025	413	0.9147	70.979	506	0.9267	78.7304	383	0.8729	67.6012	473	0.8925	75.5402	452	0.909	71.1188	456	0.9254	74.3958	502	0.9286	82.8095	458	0.9273	76.8897	543	0.8698	96.3924	419	0.9431	75.9772
ENSRNOG00000045892	Cfl2	2924	236	0.5068	22.5845	808	0.8858	70.6393	661	0.8615	61.4626	876	0.9032	73.7437	718	0.9241	68.5661	781	0.906	67.4834	761	0.8598	64.7828	799	0.8786	70.5277	713	0.8468	63.6349	687	0.8605	62.4005	792	0.9039	76.0671	645	0.8314	63.2788
ENSRNOG00000017418	Rps3	809	236	0.9543	81.6279	375	0.9988	118.494	510	0.9951	171.399	330	0.9951	100.407	272	0.9951	93.882	588	0.9975	183.634	343	0.9604	105.535	351	0.9975	111.982	572	0.9951	184.515	309	0.9802	101.442	396	0.9975	137.466	457	0.9802	162.048
ENSRNOG00000011077	Tjp1	6614	236	0.5907	9.98442	254	0.7728	9.81707	145	0.6007	5.9606	312	0.8287	11.6115	241	0.7425	10.1745	202	0.7241	7.71633	246	0.7672	9.25813	242	0.7554	9.44368	207	0.7082	8.1675	257	0.7717	10.32	265	0.798	11.252	218	0.7584	9.45515
ENSRNOG00000030628	Eif4a1	1770	236	0.7768	37.309	571	0.8503	82.466	512	0.8322	78.6472	615	0.822	85.5264	468	0.8418	73.8303	649	0.8435	92.6392	551	0.8525	77.4873	558	0.8322	81.3675	560	0.8424	82.5653	514	0.8441	77.1256	529	0.8514	83.9328	511	0.8266	82.8178
ENSRNOG00000007089	Lgmn	1818	236	0.9213	36.324	339	0.973	47.667	248	0.9769	37.0889	397	0.9708	53.752	315	0.9543	48.3814	295	0.9653	40.997	317	0.9741	43.4028	316	0.9835	44.8625	296	0.9802	42.4894	320	0.9785	46.7482	346	0.9752	53.448	248	0.9818	39.1322
ENSRNOG00000000304	Cd164	2821	235	0.8075	23.3099	556	0.9553	50.383	448	0.9848	43.1779	575	0.9801	50.1722	480	0.9766	47.5117	546	0.9805	48.9005	511	0.9656	45.0889	516	0.9766	47.2103	482	0.9876	44.5889	480	0.9798	45.1905	525	0.978	52.2643	487	0.9734	49.5224
ENSRNOG00000004629	Fkbp3	1150	235	0.7643	57.1801	636	0.9565	141.375	668	0.9409	157.93	498	0.927	106.593	520	0.9678	126.261	767	0.933	168.508	461	0.9209	99.7827	562	0.9322	126.133	667	0.9157	151.36	439	0.907	101.385	600	0.9148	146.522	617	0.8835	153.909
ENSRNOG00000000826	Flot1	1697	235	0.9505	38.7491	394	0.99	59.3508	296	0.9611	47.4238	401	0.9717	58.1649	311	0.9617	51.173	349	0.9888	51.9597	358	0.9965	52.5114	402	0.9965	61.1413	335	0.9611	51.5165	356	0.9623	55.7156	430	0.9546	71.16	289	0.9694	48.8531
ENSRNOG00000002459	Fbxo40	2845	235	0.8158	23.1132	259	0.9163	23.2718	148	0.8306	14.1438	442	0.9575	38.2418	259	0.9104	25.4202	230	0.9083	20.4253	368	0.9237	32.1972	284	0.9188	25.7648	223	0.8731	20.4553	301	0.9448	28.0991	278	0.9047	27.4417	206	0.8953	20.7712
ENSRNOG00000042320	Slc41a1	4650	235	0.5875	14.1413	155	0.6858	8.52101	165	0.7211	9.64756	265	0.8288	14.0278	166	0.6933	9.96821	153	0.7159	8.31308	225	0.788	12.0443	188	0.7656	10.4351	172	0.749	9.65292	210	0.7746	11.9943	168	0.7568	10.1463	177	0.7187	10.9193
ENSRNOG00000030024	Zfp36l1	996	235	0.9127	66.0213	171	0.9398	43.8883	133	0.9297	36.306	219	0.9357	54.1231	152	0.9277	42.6134	147	0.9287	37.2891	199	0.9257	49.7331	209	0.9378	54.1598	156	0.9337	40.8741	169	0.9327	45.0647	159	0.9257	44.8319	149	0.9257	42.9144
ENSRNOG00000020244	RGD1304931	3861	234	0.8249	16.9587	276	0.8643	18.2735	196	0.8407	13.802	343	0.9482	21.8672	246	0.8674	17.7909	197	0.8068	12.8911	285	0.9112	18.3737	266	0.9306	17.7817	209	0.8718	14.1263	257	0.8653	17.6784	275	0.9112	20.0024	186	0.7884	13.8194
ENSRNOG00000018194	Srrm1	3623	234	0.7541	18.0727	206	0.828	14.5349	184	0.8476	13.8082	263	0.9224	17.8684	200	0.8648	15.4143	229	0.875	15.9695	234	0.8581	16.0768	278	0.9379	19.8046	248	0.91	17.8635	228	0.8849	16.7138	232	0.8855	17.9833	188	0.9089	14.8856
ENSRNOG00000001316	Anapc5	2363	234	0.9035	27.7094	461	0.9877	49.8711	472	0.9877	54.3081	492	0.9776	51.2507	420	0.9708	49.6304	520	0.9873	55.5985	408	0.9843	42.9782	454	0.9958	49.5887	509	0.981	56.213	414	0.9911	46.5313	537	0.9941	63.8204	472	0.9877	57.3
ENSRNOG00000018704	Nolc1	3610	234	0.7047	18.1378	261	0.856	18.4819	238	0.7947	17.9249	379	0.9083	25.8422	276	0.8983	21.3483	274	0.9271	19.1764	298	0.8867	20.5476	329	0.8756	23.5223	303	0.8814	21.9037	16	0.197	1.17712	16	0.1873	1.24469	16	0.1964	1.27142
ENSRNOG00000004072	Myo1c	3789	234	0.7836	17.2809	398	0.9124	26.8516	303	0.8712	21.7423	470	0.9733	30.5331	372	0.9454	27.4145	369	0.938	24.6051	400	0.9549	26.2777	393	0.9451	26.7706	434	0.9501	29.8915	365	0.9324	25.5845	413	0.9599	30.6108	339	0.944	25.6656
ENSRNOG00000047097	Iqsec1	3300	233	0.8439	19.7568	123	0.7615	9.52803	99	0.6879	8.15657	216	0.9027	16.1116	128	0.7715	10.8307	110	0.7248	8.42175	178	0.8442	13.4264	153	0.8455	11.9665	159	0.887	12.5738	168	0.827	13.5209	158	0.8379	13.446	115	0.8064	9.99677
ENSRNOG00000004553	COX20	1709	233	0.7162	38.1495	213	0.8824	31.8603	227	0.9116	36.1136	212	0.8561	30.5346	157	0.7583	25.6519	238	0.873	35.1851	168	0.7671	24.4692	193	0.6963	29.1478	201	0.8268	30.6928	178	0.8461	27.6622	231	0.8906	37.9594	151	0.8286	25.3461
ENSRNOG00000011951	Plk2	2770	232	0.8202	23.436	562	0.9773	51.8643	345	0.9498	33.863	450	0.93	39.9881	518	0.9823	52.217	334	0.9347	30.4642	489	0.9704	43.9422	576	0.9556	53.6702	398	0.9408	37.4961	397	0.9545	38.0645	480	0.9816	48.6643	321	0.9361	33.2431
ENSRNOG00000014436	Ppip5k1	5485	231	0.676	11.7845	303	0.8427	14.1214	178	0.6729	8.82328	340	0.8667	15.2581	306	0.8857	15.5778	235	0.7954	10.8247	288	0.8321	13.0698	342	0.8474	16.0931	245	0.8044	11.6566	19	0.1457	0.919996	19	0.1606	0.972806	19	0.1429	0.993695
ENSRNOG00000010362	Anxa2	1359	231	0.9345	47.5628	407	0.972	76.5574	323	0.9625	64.6204	405	0.9573	73.3557	352	0.975	72.3245	349	0.9588	64.8828	323	0.9728	59.161	383	0.9684	72.7394	335	0.9603	64.3292	23	0.5195	4.49487	23	0.5688	4.75289	23	0.543	4.85495
ENSRNOG00000020595	Rps11	591	231	0.912	109.37	577	0.9729	249.575	655	0.9814	301.329	512	0.9695	213.246	455	0.9492	214.974	705	0.9712	301.387	459	0.9475	193.32	523	0.9763	228.404	712	0.9746	314.395	395	0.9594	177.508	503	0.9662	239.018	633	0.9729	307.25
ENSRNOG00000001053	Tmed2	1958	231	0.9142	33.0122	435	0.9842	56.7922	412	0.9791	57.2099	464	0.975	58.3315	442	0.976	63.0335	500	0.9872	64.518	402	0.9811	51.1053	437	0.9826	57.6048	421	0.9867	56.1116	404	0.9801	54.7996	443	0.9755	63.539	392	0.9806	57.4314
ENSRNOG00000003745	Atf3	1894	230	0.9852	33.98	617	0.9952	83.2755	380	0.9789	54.5494	457	0.9905	59.3929	431	0.9942	63.5418	337	0.991	44.9545	532	0.9963	69.9172	441	0.9884	60.0965	321	0.9916	44.2291	460	0.9947	64.504	499	0.9931	73.9895	315	0.991	47.7097
ENSRNOG00000001843	Bcl6	3389	229	0.7566	18.9077	198	0.8386	14.935	114	0.7147	9.14576	232	0.8581	16.8506	170	0.8082	14.0068	158	0.7952	11.779	204	0.8737	14.9834	202	0.859	15.384	149	0.7979	11.4735	194	0.8073	15.2033	194	0.884	16.0761	148	0.7973	12.5275
ENSRNOG00000000378	CTNNA3	1577	229	0.4838	40.633	359	0.532	58.1936	229	0.4933	39.4812	230	0.4978	35.9	203	0.4458	35.944	190	0.4597	30.44	225	0.5352	35.5143	247	0.5295	40.4255	188	0.4819	31.1107	251	0.4921	42.2718	281	0.5606	50.0408	189	0.4172	34.38
ENSRNOG00000016789	Actr1b	3175	229	0.8164	20.1821	309	0.949	24.8787	280	0.9169	23.9773	427	0.9928	33.1041	313	0.9616	27.5272	338	0.971	26.8965	337	0.9849	26.4203	370	0.9899	30.078	359	0.9953	29.5076	360	0.9836	30.1139	380	0.9701	33.6116	362	0.9924	32.707
ENSRNOG00000009155	Ndufs3	1056	229	0.7973	60.6802	658	0.8381	159.285	666	0.8797	171.473	548	0.8428	127.736	490	0.8381	129.567	697	0.8381	166.76	500	0.8419	117.858	536	0.8485	131.006	709	0.8608	175.213	538	0.8447	135.309	662	0.8504	176.053	633	0.8845	171.955
ENSRNOG00000007587	Tcp11l2	2261	228	0.8899	28.2169	455	0.9721	51.4426	333	0.9779	40.0433	615	0.981	66.9534	374	0.9788	46.1884	322	0.9774	35.9815	469	0.9668	51.6327	425	0.9668	48.5153	329	0.9673	37.9733	400	0.9624	46.986	438	0.969	54.403	336	0.9841	42.6299
ENSRNOG00000042980	Adam19	6286	228	0.6225	10.1493	284	0.7811	11.5493	167	0.6367	7.22318	304	0.8514	11.9041	254	0.7824	11.2829	215	0.738	8.64147	283	0.7762	11.2064	278	0.8182	11.4146	198	0.7415	8.22004	294	0.8174	12.4217	274	0.7719	12.2412	205	0.7404	9.35525
ENSRNOG00000000658	Acacb	7403	228	0.6385	8.61792	289	0.7188	9.97935	189	0.6528	6.9413	339	0.784	11.2717	196	0.6695	7.39282	190	0.6446	6.48439	314	0.7741	10.5578	315	0.7921	10.9823	268	0.7918	9.44735	25	0.1614	0.896894	25	0.1594	0.948378	25	0.1448	0.968742
ENSRNOG00000004925	Ppp1r12a	3469	228	0.8265	18.391	307	0.8706	22.6228	203	0.8314	15.9103	321	0.9239	22.7771	275	0.8864	22.1356	225	0.8293	16.3871	325	0.9421	23.3201	303	0.919	22.5439	219	0.8945	16.4749	295	0.9245	22.5853	304	0.938	24.6104	211	0.8435	17.4483
ENSRNOG00000012206	Dennd5a	4928	228	0.7293	12.9461	246	0.7778	12.7608	193	0.7514	10.6481	388	0.9022	19.3802	236	0.7754	13.3722	310	0.7942	15.8933	341	0.8699	17.2241	232	0.8088	12.1509	308	0.8947	16.3103	324	0.8582	17.4616	252	0.7806	14.3608	245	0.7857	14.2617
ENSRNOG00000033426	Cdc37	1604	228	0.831	39.7746	445	0.9863	70.9198	393	0.9607	66.6154	408	0.9726	62.6115	296	0.9726	51.5287	433	0.9776	68.2035	329	0.98	51.0556	344	0.9763	55.3534	407	0.9751	66.2175	335	0.9645	55.4689	476	0.9813	83.3397	338	0.98	60.4489
ENSRNOG00000011887	RGD1307929	7291	228	0.6847	8.7503	377	0.8165	13.218	190	0.6343	7.08521	485	0.9022	16.3739	360	0.8096	13.7872	291	0.7662	10.0839	430	0.8615	14.6803	418	0.891	14.7972	340	0.8346	12.1696	349	0.7952	12.713	442	0.8855	17.0249	276	0.7556	10.8592
ENSRNOG00000007518	Nckap1	4048	227	0.7885	15.6914	518	0.9471	32.7116	389	0.8844	26.1274	565	0.9427	34.3563	459	0.9202	31.6617	412	0.9123	25.7146	471	0.9412	28.9623	497	0.9503	31.6888	427	0.9412	27.5277	431	0.9405	28.2778	525	0.9474	36.4224	361	0.9224	25.5825
ENSRNOG00000003689	Nono	2411	227	0.9287	26.3453	296	0.9975	31.3839	204	0.9606	23.0049	325	0.9909	33.1806	289	0.9614	33.4705	337	0.988	35.3147	281	0.9162	29.0109	301	0.9896	32.2225	291	0.9697	31.4977	270	0.9718	29.7424	327	0.99	38.089	266	0.9278	31.649
ENSRNOG00000012873	Gfm1	2610	227	0.8697	24.3366	360	0.9667	35.2593	269	0.9502	28.0219	377	0.9425	35.5549	328	0.9521	35.091	332	0.9299	32.1382	321	0.951	30.6138	339	0.9521	33.5235	327	0.959	32.6957	395	0.954	40.1944	339	0.9598	36.4761	309	0.9352	33.9621
ENSRNOG00000031890	Ncam1	2935	226	0.8198	21.5464	284	0.802	24.7356	182	0.7976	16.8597	327	0.8688	27.4244	270	0.7939	25.6873	242	0.8044	20.832	254	0.876	21.5416	315	0.8177	27.7008	258	0.8167	22.9401	262	0.802	23.7084	298	0.8133	28.514	217	0.8317	21.2094
ENSRNOG00000015295	Ctdsp1	2290	226	0.8638	27.6152	232	0.9459	25.8979	225	0.9087	26.7137	291	0.9231	31.2792	207	0.9301	25.2404	275	0.9301	30.3404	200	0.9153	21.7394	218	0.9659	24.5703	280	0.9319	31.9084	35	0.4258	4.05921	36	0.493	4.41485	32	0.4563	4.00858
ENSRNOG00000017851	Etfb	837	226	0.9534	75.5541	584	0.9904	178.361	585	0.9904	190.028	460	0.9761	135.279	467	0.9809	155.795	705	0.9857	212.808	430	0.9904	127.878	512	0.9964	157.883	651	0.9928	202.973	418	0.9821	132.635	585	0.9881	196.282	579	0.9869	198.44
ENSRNOG00000019673	Zfp36	1811	226	0.7791	34.9193	232	0.8857	32.7478	174	0.9475	26.1227	152	0.9067	20.6597	134	0.8112	20.6609	159	0.9105	22.1821	164	0.9216	22.5412	134	0.9172	19.0975	118	0.8531	17.0038	147	0.8592	21.558	194	0.9266	30.0838	191	0.9553	30.2546
ENSRNOG00000003291	Creg1	2105	226	0.7216	30.0422	262	0.9335	31.8172	172	0.9002	22.2158	262	0.9615	30.6371	228	0.8969	30.2444	186	0.8432	22.3246	249	0.9425	29.4442	272	0.8812	33.3509	215	0.9354	26.6544	261	0.9017	32.9304	224	0.866	29.8844	197	0.8451	26.8467
ENSRNOG00000004143	Adipor1	2025	225	0.9165	31.0909	429	0.964	54.1557	381	0.9289	51.1548	461	0.9886	56.0369	375	0.9304	51.7093	469	0.9877	58.5155	111	0.8351	13.6443	111	0.8519	14.1478	111	0.8746	14.3048	410	0.9279	53.7734	402	0.9274	55.7507	391	0.9575	55.3895
ENSRNOG00000029360	Serinc1	2746	225	0.8336	22.9275	704	0.9782	65.5367	520	0.9632	51.486	751	0.941	67.319	643	0.988	65.3842	677	0.9982	62.289	111	0.7691	10.0618	111	0.7968	10.4331	111	0.7972	10.5489	666	0.9869	64.4144	687	0.9916	70.2596	563	0.9938	58.8144
ENSRNOG00000011725	Ubap2	4348	225	0.7654	14.48	193	0.8333	11.347	166	0.7544	10.3802	280	0.8383	15.8514	170	0.8001	10.9175	235	0.8425	13.6553	217	0.848	12.4229	214	0.848	12.7032	229	0.8717	13.7445	218	0.828	13.3161	206	0.7845	13.3054	201	0.7523	13.2612
ENSRNOG00000020235	Hnrnpl	2185	224	0.8124	28.6861	296	0.9007	34.63	228	0.8224	28.3707	331	0.9199	37.2885	246	0.8764	31.4373	286	0.8421	33.0703	321	0.9213	36.5684	323	0.903	38.1541	295	0.9213	35.2333	281	0.9135	34.1558	308	0.93	39.5866	257	0.9213	33.741
ENSRNOG00000031544	Larp1	2871	224	0.8966	21.8318	211	0.9331	18.7872	165	0.8983	15.6256	319	0.9568	27.3499	236	0.9147	22.9531	183	0.9133	16.1043	293	0.9704	25.4031	219	0.8781	19.688	204	0.9126	18.543	255	0.969	23.5893	263	0.9592	25.726	212	0.906	21.1826
ENSRNOG00000017421	Alpk2	6120	224	0.674	10.2417	262	0.7683	10.9436	204	0.7273	9.06286	402	0.8815	16.1686	283	0.7891	12.9121	248	0.7989	10.2382	321	0.8562	13.0559	321	0.8469	13.5377	307	0.8569	13.0909	279	0.8039	12.1077	317	0.799	14.5465	281	0.8178	13.1714
ENSRNOG00000008604	Nsfl1c	1450	223	0.8131	43.034	347	0.8931	61.1749	277	0.88	51.9396	295	0.9062	50.0786	289	0.9131	55.6534	309	0.9214	53.8411	318	0.9503	54.5898	309	0.9062	55.0023	284	0.9166	51.1132	296	0.9207	54.2166	373	0.9641	72.2421	301	0.9338	59.549
ENSRNOG00000005615	Gadd45a	1222	223	0.8314	51.0633	716	0.9452	149.78	483	0.9673	107.464	690	0.9583	138.988	651	0.9583	148.755	641	0.982	132.529	650	0.9681	132.402	638	0.9247	134.753	570	0.964	121.727	626	0.9763	136.054	660	0.9673	151.678	500	0.9419	117.375
ENSRNOG00000008498	Gabarapl1	1711	223	0.9585	36.4695	415	0.9848	62.0026	318	0.9801	50.5317	387	0.9719	55.6749	346	0.9679	56.4661	380	0.9942	56.1122	390	0.9795	56.7371	355	0.9877	53.5511	396	0.979	60.3988	360	0.9731	55.8806	439	0.9813	72.0549	386	0.9667	64.7162
ENSRNOG00000001456	Nup153	5705	223	0.6841	10.9377	328	0.85	14.6971	221	0.7951	10.5323	256	0.7804	11.0454	177	0.7292	8.66323	173	0.7171	7.6615	311	0.8289	13.5693	343	0.8733	15.5177	270	0.8384	12.3507	30	0.2117	1.39661	30	0.2039	1.47678	30	0.2046	1.50849
ENSRNOG00000028674	Fbxw5	2352	223	0.8074	26.5303	309	0.9239	33.5841	270	0.9175	31.2114	314	0.9358	32.8617	263	0.9375	31.2234	264	0.9035	28.3589	294	0.9303	31.1145	278	0.9303	30.5069	290	0.9277	32.1769	237	0.9039	26.7621	328	0.9541	39.1639	247	0.9341	30.1256
ENSRNOG00000050317	Uhrf1bp1l	6814	223	0.579	9.15752	268	0.7382	10.0541	194	0.6419	7.7408	394	0.792	14.2329	246	0.6732	10.0808	250	0.6581	9.26961	378	0.7645	13.8084	309	0.7328	11.7043	251	0.7078	9.6129	295	0.748	11.4982	308	0.7495	12.694	226	0.6628	9.51442
ENSRNOG00000032703	Rasgrp3	4291	222	0.7492	14.4767	365	0.9361	21.7444	246	0.8509	15.587	410	0.9399	23.5193	329	0.924	21.4092	290	0.9121	17.0751	361	0.9282	20.9412	393	0.9441	23.6387	279	0.9058	16.9679	308	0.8975	19.0634	398	0.914	26.048	233	0.8485	15.5766
ENSRNOG00000014160	Tcp1	1831	222	0.9388	33.9266	557	0.9924	77.7641	397	0.9492	58.9507	568	0.9792	76.3586	470	0.9918	71.6756	491	0.9956	67.7511	483	0.9956	65.6615	511	0.9924	72.0316	444	0.9803	63.2816	466	0.9874	67.5937	492	0.9863	75.4616	404	0.9803	63.2949
ENSRNOG00000046002	-	1450	222	0.4448	42.8411	437	0.4924	77.0417	524	0.4862	98.2539	386	0.4524	65.5266	313	0.4497	60.2752	544	0.4393	94.7882	375	0.4628	64.3747	358	0.5214	63.7243	470	0.5345	84.5888	358	0.5138	65.5728	414	0.5166	80.1829	467	0.511	92.39
ENSRNOG00000036696	Hgs	2809	221	0.8259	22.0149	281	0.9537	25.5721	207	0.9071	20.0357	291	0.9498	25.5	212	0.9427	21.074	219	0.9519	19.6977	262	0.9452	23.2168	271	0.9826	24.9005	280	0.9644	26.0129	25	0.3265	2.36373	25	0.3343	2.49941	25	0.2876	2.55308
ENSRNOG00000016950	Otud1	1368	221	0.9591	45.2045	303	0.9832	56.6198	151	0.9744	30.0108	326	0.9868	58.6583	234	0.9803	47.763	192	0.9737	35.46	335	0.9605	60.9552	285	0.9722	53.7711	215	0.9583	41.0143	275	0.9532	53.3895	276	0.9664	56.6594	193	0.9423	40.4713
ENSRNOG00000007111	Nrd1	3876	221	0.8158	15.9545	397	0.888	26.183	287	0.9027	20.1319	67	0.5395	4.2549	67	0.5157	4.82673	67	0.5493	4.36731	380	0.9056	24.4035	398	0.8978	26.5027	365	0.9688	24.5749	370	0.8922	25.3529	393	0.8971	28.4746	296	0.8336	21.9071
ENSRNOG00000019090	Cct3	1872	219	0.9193	32.7351	535	0.9936	73.0567	469	0.9984	68.1167	625	0.9792	82.1812	464	0.9882	69.2109	520	0.9899	70.1812	498	0.9915	66.2179	544	0.9952	75.0038	516	0.945	71.9328	527	0.9818	74.7676	564	0.9872	84.6102	459	0.9856	70.3368
ENSRNOG00000004616	Npm1	1279	219	0.8124	47.9125	542	0.8382	108.328	411	0.8264	87.3691	499	0.8382	96.0347	458	0.8507	99.9901	569	0.846	112.4	433	0.8311	84.2693	531	0.81	107.155	446	0.8491	91.0012	456	0.8225	94.6898	561	0.8522	123.18	409	0.8264	91.7337
ENSRNOG00000026293	Jun	1005	219	0.9622	60.9752	370	0.993	94.1126	175	0.998	47.3433	223	0.9801	54.6181	213	0.993	59.1801	182	0.9861	45.754	281	0.991	69.5973	258	0.991	66.2589	153	0.996	39.7291	236	0.991	62.367	314	0.993	87.7431	178	0.9841	50.8077
ENSRNOG00000002827	Rbfox1	4153	219	0.6468	14.7556	242	0.8553	14.8959	147	0.7539	9.6237	268	0.8312	15.8844	179	0.7556	12.0352	180	0.8156	10.9505	217	0.8286	13.0062	234	0.8671	14.5427	154	0.7729	9.67702	245	0.8534	15.668	245	0.8534	16.5674	162	0.7111	11.19
ENSRNOG00000009713	Oxa1l	1531	219	0.8968	40.0262	353	0.9811	58.9402	277	0.9824	49.1916	352	0.983	56.5934	274	0.9915	49.9732	338	0.9752	55.7783	348	0.9922	56.5791	313	0.9915	52.7666	348	0.9863	59.3181	297	0.97	51.5217	331	0.9909	60.7158	231	0.9856	43.2825
ENSRNOG00000036698	Nploc4	3550	219	0.8301	17.262	419	0.9642	30.1716	275	0.933	21.0616	457	0.9817	31.6874	396	0.9662	31.1479	352	0.9501	25.0517	406	0.9552	28.4675	415	0.971	30.1724	378	0.9831	27.7873	387	0.9817	28.9529	430	0.9825	34.0165	319	0.9625	25.7774
ENSRNOG00000020255	Sars	1857	219	0.9343	32.9995	416	0.9882	57.2656	360	0.9876	52.7081	402	0.958	53.2859	366	0.9871	55.034	385	0.9785	52.3808	396	0.9634	53.0806	336	0.9688	46.7001	393	0.9655	55.2286	386	0.9682	55.2058	449	0.9698	67.9022	358	0.9871	55.3028
ENSRNOG00000020730	Nbr1	4166	219	0.8356	14.7096	399	0.9623	24.4831	294	0.9349	19.1873	472	0.9863	27.8882	389	0.9441	26.0731	366	0.951	22.1965	404	0.9767	24.1387	448	0.9734	27.7555	391	0.9628	24.4929	359	0.9525	22.8868	443	0.983	29.863	328	0.9395	22.5855
ENSRNOG00000037244	Atp6ap1	2075	218	0.9118	29.3977	384	0.9827	47.307	295	0.9605	38.6536	388	0.9952	46.0269	308	0.9687	41.4472	306	0.9957	37.2586	332	0.9981	39.8265	349	0.9995	43.4108	320	0.9961	40.2453	314	0.9894	40.1902	392	0.9952	53.0539	315	0.974	43.548
ENSRNOG00000021125	Prdx5	816	218	0.9252	74.7552	411	0.9694	128.755	413	0.9387	137.609	304	0.9228	91.7026	282	0.9387	96.4986	502	0.9816	155.431	309	0.9706	94.2585	334	0.9387	105.644	384	0.9632	122.807	284	0.9779	92.4351	400	0.9657	137.664	381	0.973	133.94
ENSRNOG00000012240	Supt6h	6434	217	0.645	9.43743	254	0.7704	10.0917	152	0.6155	6.42316	310	0.7955	11.8598	230	0.7474	9.9818	190	0.7338	7.46098	264	0.7532	10.2135	251	0.7352	10.0689	261	0.7094	10.5863	243	0.7711	10.0308	282	0.8169	12.3088	196	0.7016	8.73878
ENSRNOG00000024907	Tnrc6b	17543	217	0.35	3.46124	251	0.4408	3.65748	157	0.3265	2.43323	251	0.4332	3.52183	228	0.4076	3.62905	162	0.3368	2.33311	245	0.4117	3.47628	252	0.4409	3.70755	159	0.3237	2.36525	273	0.432	4.13302	247	0.4311	3.95405	190	0.36	3.10689
ENSRNOG00000042022	H1f0	1854	217	0.8371	32.751	307	0.9968	42.3293	251	0.9773	36.8087	437	0.9919	58.019	278	0.9871	41.8694	291	0.9585	39.6558	372	0.9461	49.9442	316	0.9628	43.9914	306	0.9655	43.072	322	0.9741	46.127	358	0.9962	54.2279	302	0.9757	46.7276
ENSRNOG00000008393	Tax1bp1	2896	217	0.8208	20.967	446	0.9893	39.3685	329	0.933	30.8876	550	0.9658	46.7479	359	0.9651	34.6145	354	0.9544	30.8836	475	0.9579	40.827	482	0.9665	42.9575	372	0.961	33.5218	448	0.9631	41.0855	486	0.98	47.1289	328	0.9662	32.4901
ENSRNOG00000001645	Filip1l	3390	217	0.7212	17.9116	164	0.7596	12.3668	127	0.7136	10.1857	224	0.8145	16.2647	168	0.782	13.8379	147	0.7876	10.9557	226	0.8103	16.5944	176	0.7316	13.4	145	0.7322	11.1622	234	0.79	18.3326	179	0.7319	14.8287	146	0.7265	12.3546
ENSRNOG00000009715	Me1	3006	217	0.7991	20.1997	478	0.9651	40.6491	364	0.9867	32.923	83	0.6065	6.79653	83	0.5625	7.70994	83	0.6507	6.9761	421	0.983	34.8614	479	0.9887	41.1279	399	0.9541	34.6391	416	0.9604	36.7547	444	0.9727	41.4804	358	0.9627	34.1641
ENSRNOG00000014128	Ecsit	1484	217	0.9178	40.9167	282	0.9751	48.5766	217	0.9623	39.7569	297	0.9757	49.263	224	0.9838	42.1479	274	0.9811	46.6488	279	0.9838	46.7975	253	0.9852	44.0025	318	0.9872	55.9212	258	0.967	46.1737	282	0.9575	53.366	245	0.9865	47.3596
ENSRNOG00000014603	Sgcg	1496	216	0.9231	40.4015	487	0.9947	83.2165	442	0.9806	80.3299	524	0.998	86.218	472	0.9733	88.0993	489	0.9993	82.5849	476	0.992	79.2004	486	0.9926	83.8484	467	0.9947	81.4645	455	0.9987	80.7772	468	0.9987	87.8544	448	0.9906	85.9058
ENSRNOG00000008236	Decr1	1146	216	0.9433	52.7405	437	0.9555	97.4785	412	0.966	97.746	427	0.9572	91.7152	362	0.9974	88.2035	467	0.9494	102.957	378	0.9817	82.1031	414	0.9913	93.2408	434	0.9485	98.8298	391	0.9442	90.6152	464	0.9686	113.706	399	0.9599	99.8767
ENSRNOG00000004741	Rpl19	703	216	0.8876	85.9753	686	0.9203	249.449	839	0.9331	324.484	599	0.909	209.734	516	0.9018	204.954	958	0.9118	344.297	567	0.9004	200.761	526	0.9004	193.117	913	0.9161	338.921	471	0.9161	177.94	657	0.9075	262.458	731	0.8976	298.29
ENSRNOG00000033169	Cpeb4	2830	215	0.8304	21.2582	257	0.9703	23.2145	121	0.8208	11.6248	378	0.9873	32.8779	275	0.9647	27.1337	193	0.9629	17.2304	308	0.965	27.0905	293	0.9922	26.7222	203	0.9777	18.7194	338	0.989	31.7204	292	0.9922	28.9765	179	0.9551	18.1444
ENSRNOG00000019450	Etf1	2262	215	0.8546	26.5963	430	0.9885	48.5946	307	0.9704	36.9005	449	0.9836	48.8598	366	0.9744	45.1805	349	0.9898	38.9813	399	0.9823	43.9069	441	0.9969	50.3195	361	0.992	41.6483	382	0.9965	44.8518	438	0.992	54.3789	327	0.9859	41.4697
ENSRNOG00000004612	Ppp1cb	2927	215	0.67	20.5537	876	0.9324	76.5057	696	0.9375	64.6507	913	0.9238	76.7797	719	0.9392	68.5912	797	0.9576	68.7953	785	0.9604	66.7574	828	0.9634	73.0126	811	0.9498	72.3071	44	0.4609	3.99244	45	0.4643	4.31757	46	0.4568	4.50828
ENSRNOG00000003951	Psmc1	1557	215	0.9544	38.6389	365	0.9884	59.9262	363	0.9281	63.3876	409	0.9621	64.6596	338	0.9846	60.6164	418	0.9846	67.8283	377	0.9756	60.2705	369	0.9762	61.1685	439	0.9595	73.5799	24	0.4978	4.09385	24	0.508	4.32884	24	0.5196	4.4218
ENSRNOG00000012255	Ktn1	3978	214	0.8183	15.053	380	0.9399	24.4192	277	0.8922	18.9322	429	0.9467	26.5455	382	0.9467	26.8139	318	0.9457	20.1969	382	0.9558	23.9029	409	0.9532	26.5368	295	0.9341	19.3526	421	0.9537	28.1078	471	0.9708	33.2511	314	0.9485	22.6434
ENSRNOG00000007607	Nr4a1	2481	214	0.8541	24.1358	190	0.9516	19.5767	160	0.9089	17.5339	255	0.9512	25.2995	167	0.9125	18.7954	146	0.9081	14.8679	225	0.9339	22.574	177	0.8251	18.4135	134	0.8908	14.0949	186	0.8791	19.9111	202	0.8767	22.8651	163	0.9726	18.8468
ENSRNOG00000019933	Ubqln4	3258	214	0.8554	18.3797	268	0.9297	21.0279	197	0.8389	16.44	325	0.9451	24.5545	238	0.8788	20.398	207	0.8594	16.0525	233	0.8932	17.8015	225	0.9282	17.8247	217	0.9138	17.3817	208	0.922	16.9559	256	0.8785	22.0667	221	0.8766	19.4589
ENSRNOG00000011307	Slmap	3637	214	0.7226	16.4644	367	0.818	25.795	230	0.7468	17.1938	446	0.9428	30.1849	276	0.8477	21.1898	266	0.7382	18.4783	325	0.815	22.2429	281	0.9126	19.9413	349	0.8917	25.0418	361	0.8559	26.3617	327	0.8394	25.2496	274	0.8194	21.6114
ENSRNOG00000011157	Jak1	4291	213	0.8238	13.8898	357	0.9406	21.2678	284	0.9187	17.9948	527	0.965	30.2308	339	0.9268	22.0599	367	0.9196	21.6088	403	0.9569	23.3775	369	0.9196	22.1952	366	0.973	22.259	391	0.9569	24.2007	367	0.9105	24.0191	293	0.9126	19.5878
ENSRNOG00000011111	RGD1309492	3986	213	0.7551	14.9526	298	0.8793	19.1113	206	0.79	14.0513	359	0.8846	22.1695	269	0.8758	18.8442	254	0.8337	16.0998	314	0.9255	19.6085	290	0.9067	18.7781	269	0.9094	17.6116	280	0.9117	18.6565	322	0.9172	22.6865	214	0.8916	15.4011
ENSRNOG00000020674	Rpl27	447	213	0.5526	133.336	295	0.5593	168.704	313	0.6488	190.381	231	0.6577	127.205	208	0.651	129.933	349	0.6398	197.261	213	0.5481	118.611	205	0.6532	118.369	288	0.5593	168.139	227	0.6532	134.874	236	0.5638	148.27	303	0.5593	194.451
ENSRNOG00000010235	Pkig	950	212	0.8011	62.4435	251	0.9916	67.5402	257	0.9505	73.5523	279	0.9411	72.2901	209	0.9411	61.4306	270	0.9747	71.8065	242	0.9432	63.408	249	0.9705	67.6497	301	0.9389	82.6848	232	0.9853	64.8595	268	0.9526	79.2247	234	0.9442	70.6591
ENSRNOG00000019276	RGD735029	3047	212	0.7233	19.4688	294	0.8139	24.6653	260	0.7758	23.2	343	0.7847	27.7089	273	0.7378	25.018	302	0.7332	25.0414	274	0.7821	22.3836	327	0.789	27.6991	305	0.8234	26.1222	262	0.7604	22.8369	354	0.7946	32.6272	268	0.766	25.2312
ENSRNOG00000021029	Hamp	411	212	0.9002	144.334	96	0.9611	59.7092	77	0.8954	50.9372	138	0.8954	82.6486	89	0.8832	60.4659	92	0.9465	56.5548	144	0.9416	87.2113	108	0.9002	67.8223	85	0.8881	53.971	132	0.9124	85.2984	104	0.9002	71.0625	73	0.8954	50.9515
ENSRNOG00000005877	Lrpprc	4309	212	0.7593	13.7669	538	0.9677	31.9167	403	0.9223	25.4282	600	0.9631	34.2746	466	0.9343	30.1975	464	0.9684	27.206	507	0.9599	29.2876	539	0.9698	32.2851	490	0.9443	29.6758	476	0.9202	29.3386	551	0.9554	35.9107	425	0.9204	28.2936
ENSRNOG00000017635	Inpp5a	2819	211	0.7769	20.9441	382	0.9546	34.6402	336	0.9475	32.4064	401	0.9652	35.0145	367	0.9422	36.3524	410	0.9752	36.7462	356	0.9585	31.4345	371	0.9677	33.9679	432	0.9727	39.9919	368	0.94	34.6706	371	0.9354	36.9597	338	0.8936	34.3952
ENSRNOG00000018836	RGD1559896	2991	211	0.7626	19.7397	254	0.904	21.7085	199	0.8943	18.0894	321	0.9843	26.4172	256	0.9194	23.8993	206	0.9104	17.401	258	0.9565	21.4712	259	0.9365	22.3498	259	0.9789	22.5978	255	0.9174	22.6429	243	0.9101	22.816	229	0.8599	21.9632
ENSRNOG00000000248	Srsf2	1901	211	0.8227	31.0581	295	0.9195	39.6691	232	0.9432	33.1812	335	0.8927	43.3771	283	0.9679	41.5687	266	0.9716	35.3527	329	0.9637	43.079	304	0.9658	41.2745	244	0.9379	33.4958	281	0.9811	39.2585	366	0.9563	54.069	245	0.9342	36.9709
ENSRNOG00000016952	Uqcr11	484	211	0.9545	121.987	647	0.9979	341.721	689	0.9959	387.044	511	0.9979	259.881	428	0.9959	246.922	755	0.9959	394.117	479	0.9959	246.344	532	0.9959	283.698	722	0.9917	389.291	456	0.9979	250.224	685	0.9876	397.461	633	0.9959	375.175
ENSRNOG00000006137	Arid1a	7063	210	0.6089	8.31965	239	0.745	8.65009	145	0.5458	5.58168	258	0.7573	8.99143	198	0.7124	7.82777	166	0.6237	5.93803	263	0.704	9.2687	242	0.7085	8.84334	142	0.575	5.24665	231	0.7201	8.68624	236	0.7286	9.38366	170	0.6272	6.90456
ENSRNOG00000000146	-	1359	210	0.9676	43.2389	283	0.9625	53.2328	197	0.9441	39.4124	265	0.975	47.9982	256	0.9816	52.5996	193	0.9389	35.8807	215	0.9787	39.3796	272	0.975	51.6583	206	0.961	39.5577	263	0.9809	51.3979	309	0.9809	63.854	175	0.9573	36.9398
ENSRNOG00000018255	Clptm1	2453	210	0.8516	23.955	261	0.9666	27.1991	229	0.9605	25.3819	315	0.9878	31.609	232	0.9625	26.409	278	0.9837	28.6333	254	0.9543	25.7744	264	0.9935	27.7777	262	0.9649	27.8732	232	0.9658	25.1188	268	0.9874	30.6822	263	0.9923	30.7563
ENSRNOG00000019192	Arhgef17	6177	210	0.6019	9.51299	201	0.6448	8.31822	144	0.5553	6.33828	265	0.7758	10.5601	202	0.6655	9.13137	168	0.6346	6.87156	222	0.7478	8.94597	241	0.7496	10.07	198	0.6777	8.36509	218	0.7298	9.3732	225	0.7429	10.2295	180	0.6642	8.35932
ENSRNOG00000007793	Pnrc1	1522	209	0.8325	38.4244	221	0.935	37.1184	128	0.9711	22.8656	262	0.9823	42.3726	173	0.9645	31.739	202	0.9455	33.5321	224	0.9527	36.6341	193	0.9731	32.729	172	0.9376	29.4915	178	0.9409	31.0609	212	0.9369	39.1174	154	0.8982	29.0257
ENSRNOG00000018818	Txnl1	1277	208	0.935	45.5772	413	0.9695	82.6744	327	0.9522	69.6215	462	0.9499	89.0531	388	0.9475	84.8404	393	0.9608	77.7544	387	0.989	75.4349	423	0.9804	85.4948	401	0.989	81.9476	340	0.9546	70.7126	416	0.9483	91.4854	364	0.9554	81.7686
ENSRNOG00000007650	Cd63	746	208	0.9665	78.0189	888	0.9826	304.289	812	0.992	295.94	800	0.9906	263.967	679	0.9906	254.152	853	0.9893	288.891	746	0.9893	248.916	730	0.9853	252.566	773	0.9839	270.411	740	0.9893	263.452	768	0.9799	289.116	726	0.9879	279.173
ENSRNOG00000019485	Bckdk	2236	208	0.5953	26.0296	294	0.6999	33.6115	252	0.7397	30.6419	303	0.7388	33.3556	256	0.7013	31.9691	258	0.7835	29.1522	276	0.7625	30.7248	278	0.7688	32.0895	274	0.7384	31.9788	249	0.7375	29.5758	272	0.7209	34.1622	232	0.7487	29.7641
ENSRNOG00000011521	Filip1	4333	208	0.7127	13.4323	227	0.8481	13.3921	166	0.7932	10.4161	300	0.8777	17.0424	249	0.8931	16.0462	168	0.7921	9.79589	277	0.9229	15.9127	254	0.8841	15.1299	161	0.8068	9.69662	261	0.8931	15.9978	287	0.8802	18.6013	175	0.7911	11.5858
ENSRNOG00000049942	RGD1564899	4239	207	0.8424	13.6641	170	0.7615	10.2517	117	0.7169	7.50428	273	0.9073	15.8525	195	0.7761	12.845	138	0.7072	8.22506	198	0.807	11.6266	246	0.8629	14.9783	222	0.8863	13.667	210	0.8481	13.1572	236	0.8587	15.635	182	0.811	12.3164
ENSRNOG00000001253	Eif3b	2919	207	0.8513	19.8432	436	0.9983	38.1825	326	0.9723	30.3648	419	0.9846	35.3328	349	0.9836	33.3852	441	0.9979	38.1705	365	0.9805	31.1251	400	0.9908	35.3685	408	0.9952	36.4762	354	0.9836	32.2091	436	0.9743	41.9471	335	0.9914	32.922
ENSRNOG00000003078	DCAF6	2556	207	0.9073	22.6613	270	0.9378	27.0032	180	0.9194	19.1469	332	0.9793	31.9724	222	0.9362	24.2524	226	0.9362	22.3394	242	0.9335	23.5671	276	0.9671	27.8701	253	0.9769	25.8311	204	0.9323	21.1972	271	0.9315	29.7754	201	0.9397	22.5586
ENSRNOG00000018651	Agtpbp1	4485	206	0.742	12.8523	363	0.9434	20.6898	246	0.8319	14.9128	466	0.9509	25.5754	335	0.9365	20.8566	306	0.8738	17.2378	390	0.932	21.6448	394	0.9099	22.6738	323	0.9122	18.7942	344	0.8928	20.3707	422	0.9394	26.424	279	0.8821	17.845
ENSRNOG00000001004	Ncor2	8576	206	0.5649	6.72137	177	0.5415	5.27595	133	0.4785	4.21651	231	0.6538	6.63018	155	0.5276	5.04672	175	0.5368	5.15557	188	0.6011	5.45664	180	0.587	5.41724	174	0.5286	5.29477	197	0.5995	6.10085	176	0.569	5.76338	158	0.5206	5.28504
ENSRNOG00000013536	Cdc42	1009	206	0.8048	57.1283	316	0.8682	80.0586	279	0.8454	75.1795	400	0.9078	97.5814	275	0.8652	76.1033	323	0.9058	80.8788	314	0.8474	77.4624	300	0.889	76.7397	322	0.8741	83.2813	316	0.9138	83.1773	304	0.9049	84.6119	294	0.8761	83.5857
ENSRNOG00000011158	Ppp2r2a	2348	206	0.911	24.5496	325	0.977	35.3832	244	0.9493	28.2539	350	0.9744	36.6917	306	0.9676	36.3903	249	0.957	26.7932	321	0.971	34.0298	333	0.9783	36.6047	250	0.9749	27.7859	22	0.3773	2.48848	22	0.3539	2.63132	22	0.4063	2.68782
ENSRNOG00000016963	Trip12	7235	205	0.6001	7.92849	335	0.7979	11.8364	238	0.672	8.94386	404	0.8276	13.7449	336	0.7978	12.9677	330	0.7587	11.5239	338	0.7754	11.6287	399	0.8619	14.2339	286	0.7519	10.316	354	0.8185	12.9949	344	0.8064	13.3527	289	0.7001	11.4587
ENSRNOG00000001551	Atp5j	433	204	0.9746	131.831	959	0.9815	566.165	1055	0.9769	662.447	685	0.9769	389.404	727	0.9792	468.823	1173	0.9838	684.437	693	0.9861	398.38	761	0.9769	453.615	985	0.9861	593.651	676	0.9792	414.637	896	0.9769	581.125	918	0.9815	608.178
ENSRNOG00000010872	Ckb	1441	204	0.9174	39.6133	326	0.9896	57.8317	277	0.9702	52.264	336	0.9653	57.3949	259	0.9604	50.1878	282	0.9611	49.4434	339	0.9695	58.5582	306	0.9542	54.8085	260	0.9604	47.0861	264	0.9632	48.6574	298	0.9868	58.0766	271	0.9584	53.9487
ENSRNOG00000015177	Sun2	3788	204	0.722	15.0694	286	0.9055	19.3005	228	0.873	16.3648	365	0.9406	23.7182	275	0.905	20.2714	273	0.8947	18.2086	306	0.9105	20.1078	270	0.8939	18.3969	288	0.9488	19.8411	262	0.9258	18.3696	295	0.9124	21.8706	273	0.886	20.6742
ENSRNOG00000005428	Ctbp1	2426	204	0.8636	23.5296	373	0.9819	39.3034	332	0.9613	37.2078	457	0.9151	46.3686	319	0.9456	36.7166	370	0.9551	38.5331	397	0.9613	40.7335	366	0.9501	38.9386	440	0.9761	47.3309	361	0.9419	39.5208	456	0.9538	52.7866	332	0.9456	39.2576
ENSRNOG00000013328	Rbpms	663	203	0.9457	85.6757	202	0.908	77.8843	178	0.9532	72.995	259	0.9894	96.1578	152	0.9548	64.0165	184	0.9879	70.1177	195	0.9472	73.2105	176	0.994	68.5156	184	0.9457	72.4248	165	0.9879	66.0966	184	0.9593	77.9388	170	0.9668	73.5549
ENSRNOG00000004711	Mta1	2625	203	0.7284	21.6392	186	0.8747	18.1132	144	0.803	14.9149	203	0.9097	19.0355	128	0.7855	13.6158	166	0.9112	15.9773	186	0.8811	17.6375	164	0.8758	16.1252	199	0.9349	19.7837	187	0.8922	18.92	188	0.904	20.113	143	0.8008	15.6273
ENSRNOG00000009960	Puf60	1886	203	0.948	30.1182	316	0.9703	42.8309	306	0.9788	44.113	326	0.9783	42.5475	290	0.9836	42.9357	293	0.974	39.2509	335	0.9793	44.2135	306	0.9629	41.8765	302	0.9809	41.7877	298	0.9745	41.9646	370	0.9677	55.0946	258	0.9539	39.2423
ENSRNOG00000000902	Hsph1	3423	202	0.8487	16.5128	712	0.9822	53.1723	634	0.9731	50.358	420	0.9346	30.2023	573	0.9684	46.7423	634	0.9714	46.7957	521	0.9717	37.8864	580	0.9728	43.7332	594	0.9772	45.2859	483	0.9606	37.4757	751	0.969	61.6144	696	0.9842	58.3282
ENSRNOG00000012415	Mpc1	889	202	0.9168	63.5806	723	0.9764	207.897	956	0.973	292.377	712	0.9775	197.141	630	0.9719	197.88	1186	0.9741	337.059	593	0.9741	166.037	685	0.9798	198.874	1016	0.973	298.246	653	0.9719	195.083	653	0.9696	206.282	921	0.9719	297.19
ENSRNOG00000048812	Gpx1	844	202	0.9218	66.9706	372	0.9858	112.671	460	0.9775	148.184	447	0.9254	130.366	298	0.9621	98.5907	488	0.9846	146.083	390	0.9585	115.02	317	0.9514	96.9409	501	0.9751	154.91	33	0.7464	10.3844	33	0.7962	10.9805	33	0.7796	11.2162
ENSRNOG00000005388	Rassf3	3290	202	0.7328	17.1803	262	0.8821	20.3572	230	0.8884	19.0072	334	0.9103	24.989	256	0.9109	21.7273	298	0.9544	22.8846	312	0.935	23.6054	298	0.9313	23.3782	279	0.9584	22.1305	292	0.9185	23.572	305	0.9359	26.0347	259	0.8805	22.5829
ENSRNOG00000019007	Rpl14	667	202	0.7706	84.7424	462	0.7646	177.063	527	0.7721	214.818	409	0.7796	150.937	367	0.7736	153.639	567	0.7736	214.773	389	0.7781	145.17	379	0.7811	146.657	539	0.7766	210.885	381	0.7826	151.708	430	0.7811	181.047	479	0.7796	206.009
ENSRNOG00000015633	Cul3	4265	201	0.6401	13.1872	375	0.7032	22.4763	294	0.6445	18.742	468	0.7046	27.01	383	0.72	25.0751	360	0.7494	21.3259	388	0.6971	22.6446	467	0.7482	28.261	354	0.7111	21.6604	401	0.7123	24.9709	446	0.7245	29.3674	331	0.7198	22.2631
ENSRNOG00000002376	CLASP1	6894	201	0.5635	8.15831	244	0.6931	9.04754	179	0.6037	7.05941	308	0.7518	10.9971	241	0.6726	9.7613	221	0.688	8.09924	254	0.677	9.17096	268	0.7228	10.0335	249	0.7153	9.42564	242	0.7093	9.32294	311	0.7258	12.6689	216	0.6477	8.9879
ENSRNOG00000013532	Pgam2	827	201	0.9843	68.0089	502	0.994	155.171	574	0.9891	188.709	418	0.9927	124.414	431	0.9891	145.524	626	0.9915	191.246	472	0.9879	142.066	514	0.9927	160.416	553	0.9903	174.503	27	0.7727	8.67096	27	0.7836	9.16869	27	0.8319	9.36557
ENSRNOG00000008843	Eci1	973	201	0.9702	57.8041	528	0.9836	138.718	454	0.9836	126.861	449	0.9938	113.588	397	0.9774	113.93	482	0.9856	125.158	376	0.9836	96.1894	445	0.9877	118.042	473	0.9712	126.862	375	0.9815	102.359	512	0.9949	147.777	411	0.9764	121.173
ENSRNOG00000018977	Ap3d1	4758	201	0.7659	11.8208	293	0.839	15.7418	223	0.8325	12.7429	354	0.921	18.3137	270	0.8955	15.8453	258	0.8703	13.6999	278	0.8798	14.5436	317	0.9107	17.1959	287	0.9239	15.7413	301	0.8588	16.8016	313	0.9021	18.4743	248	0.8113	14.9521
ENSRNOG00000000417	Numa1	6930	201	0.6328	8.11593	265	0.7771	9.77518	150	0.5978	5.88497	287	0.7938	10.1941	225	0.762	9.06591	210	0.7107	7.65613	234	0.7781	8.40494	268	0.7948	9.98141	219	0.7501	8.24696	260	0.7511	9.96435	275	0.7395	11.1442	214	0.7359	8.85843
ENSRNOG00000049056	Ak1	1814	201	0.8578	31.0052	273	0.9239	38.4714	240	0.8991	35.9717	282	0.8804	38.2657	218	0.9057	33.5569	266	0.9146	37.0483	279	0.8864	38.2842	252	0.8986	35.8553	282	0.9135	40.569	272	0.8958	39.8236	306	0.9101	47.3733	240	0.8848	37.9533
ENSRNOG00000004777	Esf1	3404	201	0.75	16.5227	303	0.9301	22.7544	221	0.8798	17.6518	284	0.9201	20.5365	262	0.9415	21.4919	240	0.9286	17.8133	257	0.8772	18.793	309	0.9289	23.4293	223	0.9222	17.0961	281	0.8972	21.9243	310	0.9048	25.5753	211	0.8822	17.7815
ENSRNOG00000029652	-	672	200	0.1905	83.2791	932	0.2619	354.535	1688	0.1905	682.951	721	0.1979	264.097	511	0.2143	212.331	541	0.2128	203.4	483	0.2083	178.908	546	0.2292	209.707	666	0.1994	258.635	467	0.2024	184.568	381	0.2188	159.223	380	0.2024	162.215
ENSRNOG00000011383	Ndufs4	1518	200	0.9236	36.8666	500	0.9855	84.1997	437	0.9868	78.2702	434	0.9381	70.3746	417	0.9769	76.7055	585	0.9756	97.366	414	0.9611	67.8861	463	0.9789	78.7226	521	0.973	89.5672	390	0.9776	68.2342	492	0.9822	91.0212	496	0.9875	93.7316
ENSRNOG00000004078	Eno3	1442	200	0.9667	38.8097	611	0.9951	108.315	398	0.9972	75.042	496	0.9986	84.6671	520	0.9882	100.693	496	0.9986	86.904	481	0.9958	83.0294	613	0.9903	109.72	510	0.9889	92.2971	406	0.9972	74.7773	703	0.9903	136.911	433	0.9882	86.1388
ENSRNOG00000012934	Arhgef7	4538	200	0.6408	12.3322	218	0.8257	12.2802	172	0.7232	10.3051	307	0.8762	16.6522	206	0.7821	12.6755	228	0.7774	12.6939	216	0.7937	11.8479	230	0.8257	13.0814	217	0.8341	12.479	221	0.7882	12.9341	248	0.7981	15.3475	202	0.805	12.7692
ENSRNOG00000019666	Ubxn1	986	199	0.9189	56.4744	287	0.9787	74.4076	293	0.9554	80.7936	221	0.9828	55.1713	239	0.9716	67.6835	302	0.9584	77.3844	238	0.9787	60.0831	235	0.9696	61.515	303	0.9696	80.1953	248	0.9848	66.8011	318	0.9726	90.5731	269	0.9848	78.2621
ENSRNOG00000018090	Ppp6r1	4347	198	0.7028	12.7453	320	0.8311	18.818	233	0.819	14.5731	357	0.8282	20.2151	278	0.7865	17.8574	283	0.7994	16.4483	291	0.7884	16.6631	320	0.8337	18.9999	319	0.859	19.1507	322	0.8118	19.6732	333	0.868	21.5131	278	0.8192	18.3456
ENSRNOG00000007442	Ubl7	1362	198	0.8774	40.6783	170	0.92	31.9069	159	0.9273	31.74	172	0.8972	31.0849	162	0.931	33.2124	145	0.9104	26.8976	163	0.917	29.7895	160	0.9302	30.3203	171	0.9126	32.7644	146	0.9325	28.4698	179	0.9457	36.9084	139	0.9236	29.2761
ENSRNOG00000001454	Eif4h	2406	198	0.8541	23.0274	340	0.9742	36.124	282	0.9572	31.8669	387	0.973	39.5926	264	0.9551	30.6387	356	0.9863	37.3833	348	0.9505	36.0028	320	0.9792	34.3277	324	0.9796	35.1425	331	0.9879	36.5377	324	0.98	37.818	268	0.9597	31.9533
ENSRNOG00000013621	Rnd1	1609	197	0.8608	34.2598	414	0.8807	65.7743	341	0.9099	57.6215	352	0.9223	53.8499	357	0.895	61.9547	427	0.9149	67.0495	358	0.88	55.3833	399	0.9347	64.004	429	0.9124	69.58	325	0.8676	53.6459	430	0.9217	75.0519	321	0.9204	57.2302
ENSRNOG00000003723	Wdr26	6088	197	0.5629	9.05455	392	0.8624	16.4598	274	0.7443	12.2366	526	0.8853	21.2671	404	0.8693	18.5297	376	0.873	15.604	463	0.8967	18.9303	419	0.8834	17.7635	336	0.8362	14.4028	458	0.897	19.9802	450	0.9003	20.7581	347	0.8402	16.3505
ENSRNOG00000000648	Jmjd1c	8363	197	0.5479	6.59143	205	0.6321	6.2662	160	0.5594	5.20169	249	0.6658	7.32884	226	0.6647	7.54585	171	0.552	5.16604	212	0.6095	6.30995	195	0.6037	6.01815	165	0.5653	5.14879	183	0.5907	5.81163	225	0.6324	7.55561	146	0.5386	5.00803
ENSRNOG00000020683	Hnrnpul1	3731	197	0.6829	14.7746	243	0.9145	16.6492	180	0.8655	13.117	276	0.8638	18.2088	192	0.8462	14.3694	210	0.8456	14.2206	243	0.8386	16.2119	230	0.8703	15.9108	211	0.8681	14.7584	212	0.8823	15.0911	220	0.888	16.5595	204	0.8177	15.6849
ENSRNOG00000000489	Nudt3	2059	196	0.8626	26.6364	252	0.9582	31.2865	218	0.9718	28.7864	300	0.967	35.8644	221	0.9587	29.9708	230	0.9383	28.2225	234	0.9398	28.2886	241	0.9592	30.21	256	0.9655	32.4464	218	0.9675	28.1196	254	0.9767	34.6439	176	0.9034	24.5207
ENSRNOG00000012095	Pkia	1971	196	0.8935	27.8256	483	0.999	62.643	284	0.9777	39.1758	519	0.9909	64.8155	452	0.9949	64.0345	384	0.9914	49.223	451	0.9878	56.9563	501	0.9893	65.6057	430	0.997	56.9331	403	0.9878	54.3034	485	0.9919	69.1042	339	0.9924	49.3389
ENSRNOG00000024967	Uqcrb	1029	195	0.38	53.0267	400	0.4509	99.3703	345	0.586	91.157	317	0.4723	75.8302	333	0.3926	90.3631	396	0.4888	97.2307	275	0.4072	66.5226	314	0.3878	78.7598	337	0.4315	85.4668	267	0.4645	68.9136	353	0.4072	96.3404	395	0.6336	110.118
ENSRNOG00000012840	Sparc	2036	195	0.8615	26.7998	258	0.9784	32.3932	310	0.9813	41.3971	217	0.9396	26.2349	240	0.9612	32.9151	383	0.9862	47.5274	216	0.9445	26.4076	235	0.9794	29.7907	311	0.9897	39.8626	230	0.944	30.0026	249	0.9641	34.3456	354	0.9666	49.8771
ENSRNOG00000003049	Hsd17b10	907	194	0.9581	59.8508	379	0.9746	106.818	507	0.9846	151.98	369	0.9813	100.142	298	0.9901	91.7426	488	0.9791	135.936	313	0.9779	85.8992	335	0.9934	95.3296	472	0.9702	135.806	332	0.9802	97.2164	468	0.9647	144.906	394	0.9901	124.613
ENSRNOG00000019934	Paip2	1358	193	0.6436	39.7679	274	0.8697	51.5778	244	0.8962	48.8513	289	0.8351	52.3837	240	0.8733	49.3485	258	0.9043	48.0002	241	0.81	44.1743	264	0.8851	50.1758	260	0.8962	49.9639	241	0.8925	47.1331	312	0.8873	64.5214	202	0.8446	42.6705
ENSRNOG00000006420	Rbm38	2295	193	0.7778	23.5315	165	0.7795	18.3786	138	0.7203	16.3487	192	0.742	20.5929	160	0.8397	19.467	133	0.7782	14.6417	164	0.7743	17.7874	150	0.7795	16.8694	159	0.7682	18.08	139	0.7595	16.0857	163	0.7847	19.9459	101	0.6832	12.6245
ENSRNOG00000009094	Nudt4	2926	193	0.796	18.4569	336	0.9508	29.3547	251	0.917	23.3231	475	0.9487	39.9593	312	0.9617	29.7744	288	0.9129	24.868	69	0.6374	5.86985	69	0.5725	6.08646	69	0.6217	6.154	420	0.9658	38.1227	367	0.9634	35.2242	269	0.9149	26.3727
ENSRNOG00000017417	Gabarap	892	193	0.9316	60.5435	425	0.9877	121.797	433	0.9854	131.98	365	0.9608	100.722	334	0.9507	104.555	491	0.963	139.072	326	0.9776	90.9714	350	0.9809	101.273	420	0.9832	122.876	335	0.9821	99.7445	399	0.9765	125.62	350	0.9787	112.559
ENSRNOG00000005389	Ppp2ca	1888	192	0.4979	28.456	552	0.5429	74.7393	546	0.5323	78.628	486	0.5344	63.3625	476	0.5238	70.3991	562	0.5138	75.2069	422	0.5403	55.6369	530	0.5085	72.4543	498	0.5334	68.8352	422	0.5143	59.3635	477	0.4878	70.9522	474	0.5169	72.0199
ENSRNOG00000016831	Serpinh1	1924	192	0.9044	27.9236	514	0.987	68.2921	442	0.9693	62.4602	382	0.9725	48.8716	390	0.973	56.6007	366	0.9361	48.0617	363	0.9662	46.9628	441	0.9579	59.1594	417	0.9595	56.5606	330	0.9589	45.5531	447	0.9439	65.2457	352	0.9621	52.4824
ENSRNOG00000012806	Rbbp6	5370	191	0.6918	9.95255	258	0.8089	12.2817	134	0.5767	6.78449	270	0.8283	12.3762	215	0.7291	11.1796	159	0.6186	7.48077	250	0.7642	11.5883	236	0.7996	11.343	151	0.6823	7.33813	261	0.7909	12.9085	249	0.7849	13.0219	156	0.7101	8.33348
ENSRNOG00000012999	Phb2	1027	191	0.9698	52.0401	322	0.9903	80.1489	291	0.9844	77.0387	333	0.9805	79.8127	261	0.9932	70.963	324	0.9854	79.7073	289	0.9893	70.0454	270	0.9815	67.8553	313	0.9883	79.5347	284	0.9893	73.4441	304	0.9825	83.129	271	0.9796	75.6963
ENSRNOG00000014090	Retsat	1855	191	0.9342	28.8114	362	0.9946	49.8858	282	0.9795	41.3325	315	0.9833	41.7989	286	0.9881	43.0511	333	0.9849	45.3549	279	0.9892	37.438	348	0.9833	48.4201	309	0.9876	43.4708	270	0.9704	38.6571	323	0.9752	48.8999	306	0.9628	47.321
ENSRNOG00000010222	Glud1	2863	191	0.875	18.6675	443	0.9804	39.5544	351	0.9584	33.3328	492	0.9567	42.3002	385	0.9738	37.5493	417	0.9825	36.7992	390	0.957	33.9075	452	0.9881	40.7481	398	0.9508	36.2781	429	0.9612	39.7965	461	0.9822	45.2198	360	0.9665	36.0709
ENSRNOG00000006818	Arl6ip5	1453	191	0.7708	36.7826	321	0.8796	56.4744	245	0.8871	45.8445	385	0.9346	65.2219	285	0.9305	54.7698	257	0.9167	44.688	308	0.9394	52.764	283	0.914	50.2703	297	0.9298	53.3426	331	0.9525	60.5022	359	0.958	69.387	247	0.9057	48.7649
ENSRNOG00000033593	Osbpl9	2762	190	0.7911	19.2489	356	0.9211	32.9487	215	0.8193	21.1642	370	0.9066	32.9743	292	0.9272	29.5203	271	0.8635	24.7896	304	0.907	27.3969	360	0.9388	33.641	265	0.8729	25.0383	308	0.8675	29.6167	339	0.8602	34.4687	237	0.8787	24.615
ENSRNOG00000021240	Atrn	8725	190	0.5214	6.09345	262	0.6959	7.67623	165	0.5454	5.14168	381	0.8198	10.7487	238	0.6643	7.61682	272	0.6556	7.87638	298	0.7255	8.50165	335	0.7661	9.90991	261	0.686	7.80653	279	0.7221	8.49274	268	0.7099	8.62618	251	0.681	8.25248
ENSRNOG00000011237	Zc3h13	6199	190	0.672	8.57644	219	0.7658	9.03097	136	0.6069	5.96491	259	0.8255	10.2843	189	0.7277	8.51338	180	0.7035	7.33625	264	0.7884	10.6007	243	0.7872	10.1175	161	0.6622	6.77778	241	0.8109	10.3253	269	0.8119	12.1865	200	0.7469	9.25517
ENSRNOG00000008703	Rnps1	1822	190	0.8337	29.1797	269	0.9868	37.7412	235	0.9753	35.0676	300	0.9528	40.5295	221	0.9835	33.8693	250	0.9391	34.6669	258	0.9555	35.2471	288	0.9813	40.7976	264	0.9835	37.8128	239	0.972	34.8384	286	0.9286	44.0826	208	0.972	32.7485
ENSRNOG00000012580	Ccdc141	4593	190	0.8158	11.5753	302	0.9005	16.8083	192	0.8387	11.3656	369	0.914	19.7755	275	0.9247	16.7185	234	0.8539	12.8719	275	0.8574	14.9035	314	0.9332	17.6451	272	0.9099	15.4545	289	0.9214	16.7113	295	0.9133	18.0374	235	0.8576	14.6773
ENSRNOG00000007102	Acss1	3595	190	0.8406	14.7887	453	0.9847	32.2115	270	0.8971	20.4198	105	0.7143	7.18933	106	0.7129	8.23321	100	0.6595	7.02788	374	0.9669	25.8955	441	0.9719	31.6614	364	0.9522	26.4232	403	0.9616	29.7725	502	0.9805	39.2152	296	0.9004	23.6194
ENSRNOG00000009183	SZRD1	3249	190	0.6845	16.3636	211	0.9037	16.6014	179	0.8396	14.9792	250	0.8975	18.9404	182	0.8541	15.6417	225	0.852	17.4967	212	0.8418	16.242	200	0.8683	15.888	253	0.9227	20.3214	210	0.883	17.1664	236	0.864	20.3991	192	0.8975	16.9523
ENSRNOG00000008163	Atp6v1g1	1074	190	0.8408	49.5022	430	0.933	102.347	489	0.9553	123.792	83	0.8976	19.0227	83	0.8017	21.5792	83	0.9153	19.5253	451	0.9907	104.526	403	0.9534	96.8481	526	0.9693	127.81	408	0.9702	100.894	496	0.9553	129.696	468	0.9544	125.002
ENSRNOG00000001849	Mapk1	2863	189	0.8222	18.4721	240	0.9165	21.429	187	0.9197	17.7585	50	0.5292	4.2988	50	0.5341	4.87653	50	0.5285	4.41237	215	0.8914	18.6926	245	0.913	22.0869	200	0.9312	18.2302	215	0.8757	19.9446	225	0.9494	22.0704	178	0.8959	17.8351
ENSRNOG00000001662	DYRK1A	2811	189	0.7207	18.8138	216	0.9271	19.6429	143	0.799	13.8313	263	0.942	23.03	183	0.8904	18.1783	188	0.9111	16.8974	209	0.8691	18.5071	233	0.9249	21.3937	177	0.8983	16.4322	227	0.8919	21.4474	212	0.926	21.1799	162	0.9143	16.5322
ENSRNOG00000005418	Trap1	2235	189	0.9016	23.6624	262	0.987	29.9665	182	0.8837	22.1401	292	0.9919	32.1591	255	0.9763	31.8585	251	0.9629	28.3739	264	0.957	29.4021	227	0.9758	26.2143	243	0.9817	28.3734	20	0.3199	2.37663	20	0.3794	2.51305	20	0.3808	2.56702
ENSRNOG00000012271	Cnot1	7714	189	0.5609	6.85579	245	0.719	8.11893	195	0.6045	6.87292	327	0.7988	10.4344	272	0.7664	9.84581	210	0.6478	6.87801	308	0.7462	9.93856	288	0.7525	9.63614	210	0.6558	7.10432	276	0.744	9.50251	285	0.7525	10.3756	228	0.6872	8.47874
ENSRNOG00000004814	Tceb2	458	189	0.8079	115.471	199	0.9039	111.071	216	0.8886	128.226	173	0.9017	92.9777	171	0.9192	104.254	219	0.9192	120.81	183	0.917	99.4576	159	0.9017	89.6029	195	0.9148	111.11	155	0.8777	89.8825	200	0.9017	122.635	174	0.8996	108.983
ENSRNOG00000010427	Ipo7	5208	189	0.6156	10.1547	450	0.8917	22.0879	299	0.8262	15.6094	538	0.8952	25.4278	419	0.8681	22.4649	391	0.8458	18.9683	447	0.8758	21.3643	470	0.8527	23.2926	389	0.8525	19.4922	445	0.879	22.6933	487	0.8861	26.2608	317	0.8118	17.4608
ENSRNOG00000019996	Slc16a1	3297	188	0.6773	15.9556	461	0.9712	35.7433	306	0.9287	25.2342	481	0.9709	35.9107	418	0.9569	35.4013	409	0.9612	31.3421	429	0.9487	32.3885	471	0.96	36.8716	393	0.936	31.1069	386	0.9524	31.0941	433	0.9675	36.8823	353	0.9448	30.7137
ENSRNOG00000048237	Tcta	1693	188	0.8659	31.0725	347	0.9823	52.3944	250	0.9894	40.1485	318	0.9787	46.2347	284	0.9858	46.8407	287	0.9929	42.83	282	0.9882	41.4614	302	0.9652	46.0405	287	0.9693	44.2393	285	0.9439	44.7092	338	0.9663	56.0672	246	0.9486	41.6825
ENSRNOG00000021118	Nomo1	4201	188	0.7294	12.5222	293	0.8974	17.829	233	0.8165	15.0796	301	0.9176	17.6365	249	0.8646	16.5504	294	0.861	17.6815	267	0.8953	15.8202	280	0.9091	17.2027	324	0.8953	20.1268	287	0.8615	18.1442	265	0.8995	17.7151	258	0.876	17.6174
ENSRNOG00000006490	Neo1	4692	188	0.6145	11.2118	169	0.7472	9.20748	100	0.5629	5.79467	276	0.8188	14.4794	178	0.7619	10.5931	136	0.6765	7.32326	215	0.7809	11.406	199	0.8284	10.9468	139	0.7001	7.73107	221	0.796	12.5096	192	0.7587	11.4919	136	0.6918	8.3149
ENSRNOG00000020894	Lsm12	2234	188	0.8236	23.5478	269	0.9306	30.7809	233	0.8953	28.3569	274	0.9158	30.1902	204	0.9378	25.4982	241	0.9539	27.2557	256	0.9244	28.5239	267	0.9405	30.8474	231	0.9261	26.9843	230	0.9194	27.3435	266	0.9132	33.4386	222	0.8926	28.5066
ENSRNOG00000016151	Ankrd23	2561	188	0.7673	20.5411	255	0.8563	25.4532	251	0.8743	26.6471	325	0.886	31.2372	246	0.8532	26.8218	346	0.886	34.1342	297	0.8864	28.8668	259	0.8715	26.1024	316	0.8864	32.2003	26	0.3608	2.69633	26	0.3928	2.8511	26	0.3756	2.91232
ENSRNOG00000004505	Nfic	1558	187	0.7728	33.5853	125	0.9474	20.5095	85	0.8228	14.8333	182	0.9243	28.7543	95	0.8222	17.0262	99	0.7805	16.0543	153	0.9429	24.4442	115	0.8755	19.0511	139	0.9782	23.2825	10	0.2843	1.70467	10	0.2818	1.80253	10	0.2169	1.84123
ENSRNOG00000016727	Akr1a1	1399	187	0.9435	37.4024	551	0.9778	100.681	545	0.9957	105.917	458	0.975	80.5835	408	0.9607	81.4338	620	0.9807	111.969	175	0.9299	31.1367	175	0.9543	32.2857	175	0.9521	32.644	413	0.9807	78.4046	595	0.9793	119.44	498	0.9836	102.115
ENSRNOG00000014530	Nav2	10465	187	0.448	5.00009	141	0.45	3.44423	116	0.3659	3.01374	200	0.5836	4.70423	152	0.4761	4.05571	167	0.4728	4.03182	163	0.46	3.87704	139	0.4596	3.4282	162	0.4899	4.03979	161	0.5024	4.08597	155	0.5111	4.15951	164	0.5112	4.49553
ENSRNOG00000007461	Klhl41	2291	187	0.9227	22.8398	460	0.9633	51.3269	270	0.9773	32.0424	526	0.9943	56.5144	351	0.9873	42.7803	320	0.9655	35.2897	446	0.9917	48.4576	444	0.9882	50.0205	349	0.9956	39.7542	415	0.9965	48.1096	432	0.9812	52.9551	310	0.9629	38.8162
ENSRNOG00000008897	Gga1	2740	186	0.7803	18.9949	155	0.8843	14.4608	146	0.8018	14.4873	200	0.8828	17.9671	150	0.865	15.2863	172	0.9182	15.8599	148	0.7967	13.4451	157	0.8511	14.789	164	0.9015	15.6198	172	0.8358	16.672	171	0.8668	17.5265	143	0.8595	14.9714
ENSRNOG00000008616	Ubr3	5529	186	0.6549	9.41329	319	0.8401	14.7488	187	0.7765	9.19563	393	0.8944	17.4962	291	0.8649	14.6963	245	0.7944	11.1955	330	0.8264	14.8566	360	0.8763	16.8053	278	0.8171	13.1214	311	0.8038	14.939	314	0.864	15.949	238	0.7866	12.3483
ENSRNOG00000004027	Aldh9a1	2336	186	0.8365	22.28	289	0.967	31.6255	228	0.9324	26.5368	48	0.6096	5.05786	48	0.6507	5.7376	48	0.5822	5.19149	252	0.9623	26.8522	288	0.9816	31.8207	273	0.9662	30.4981	271	0.9722	30.811	339	0.9837	40.7546	256	0.9212	31.4371
ENSRNOG00000010217	Prrc2b	6231	186	0.6585	8.35277	135	0.6192	5.53845	116	0.5331	5.06159	210	0.7487	8.29583	154	0.6466	6.90121	130	0.6429	5.27119	161	0.7153	6.43162	187	0.7516	7.74594	147	0.6497	6.15662	197	0.7272	8.39687	195	0.7726	8.78873	148	0.6604	6.81365
ENSRNOG00000018708	Ppp1ca	1401	186	0.9786	37.1492	390	0.9836	71.1604	388	0.9929	75.2974	382	0.99	67.1156	348	0.9829	69.3591	473	0.9943	85.2995	364	0.9786	64.6719	380	0.9957	70.0061	482	0.9936	89.7825	34	0.5967	6.4454	34	0.6624	6.81538	34	0.6217	6.96172
ENSRNOG00000007029	Dnaja1	1610	186	0.8677	32.3268	585	0.9634	92.8843	457	0.9609	77.175	398	0.9441	60.8493	504	0.941	87.4111	550	0.9801	86.3098	471	0.9596	72.8194	525	0.9938	84.1635	480	0.9739	77.8034	387	0.9422	63.8402	577	0.9795	100.647	462	0.9857	82.3175
ENSRNOG00000011879	Nfat5	13565	185	0.3673	3.81617	192	0.4527	3.61821	133	0.3675	2.66574	262	0.5642	4.75422	196	0.4584	4.03458	149	0.39	2.77517	201	0.4865	3.68832	206	0.4997	3.91956	157	0.3671	3.02039	245	0.5376	4.79684	213	0.502	4.4097	133	0.3596	2.8126
ENSRNOG00000001055	Rilpl1	2030	185	0.8557	25.5006	281	0.9547	35.3853	230	0.9946	30.8048	327	0.9936	39.6506	282	0.9685	38.7896	310	0.9596	38.5824	285	0.9369	34.9463	305	0.9739	38.7788	277	0.9862	35.6096	265	0.9675	34.6704	344	0.9842	47.5896	273	0.9567	38.5783
ENSRNOG00000008927	Hbp1	2653	185	0.7769	19.5124	246	0.9631	23.7034	195	0.8956	19.9841	307	0.9604	28.4839	224	0.9201	23.5761	204	0.9363	19.4275	257	0.9371	24.1128	225	0.9363	21.8895	210	0.9574	20.6569	234	0.954	23.4254	204	0.8839	21.5945	207	0.9216	22.3825
ENSRNOG00000030888	Rela	2443	185	0.9026	21.1896	181	0.9394	18.9394	169	0.8985	18.8083	301	0.9922	30.3278	202	0.9726	23.0882	186	0.9312	19.2359	216	0.8588	22.0081	212	0.912	22.3977	201	0.9771	21.4712	189	0.9059	20.5469	234	0.964	26.8993	187	0.9738	21.9581
ENSRNOG00000013514	Maf1	1624	185	0.9298	31.8758	333	0.976	52.4168	305	0.9692	51.0623	330	0.9883	50.018	282	0.9495	48.487	339	0.9852	52.7396	277	0.9901	42.4567	278	0.9797	44.1824	342	0.9901	54.957	287	0.9815	46.9359	322	0.9846	55.6825	300	0.968	52.9921
ENSRNOG00000020937	Ubtf	3198	185	0.7311	16.1871	194	0.8583	15.5073	172	0.8674	14.623	268	0.9099	20.6279	186	0.853	16.2404	200	0.8824	15.8007	219	0.8762	17.0458	208	0.8965	16.7871	215	0.9043	17.5446	216	0.9093	17.9384	236	0.8959	20.7244	173	0.8361	15.5183
ENSRNOG00000038883	D17Wsu92e	3225	185	0.8443	16.0516	310	0.9789	24.5722	294	0.9755	24.7859	442	0.9628	33.7358	330	0.9597	28.5724	355	0.9674	27.8114	343	0.96	26.4738	333	0.9718	26.6505	380	0.9755	30.7494	333	0.9597	27.4235	388	0.9851	33.7871	308	0.9798	27.3966
ENSRNOG00000006180	Pum2	6085	185	0.6263	8.50719	339	0.8133	14.2414	320	0.8608	14.298	422	0.8963	17.0706	351	0.8478	16.1068	298	0.836	12.3731	371	0.8802	15.1763	367	0.8869	15.5667	306	0.7977	13.1233	373	0.8869	16.2801	343	0.8598	15.8301	298	0.8416	14.0486
ENSRNOG00000019139	Ctnnb1	3559	185	0.7207	14.5452	417	0.9615	29.9516	316	0.9098	24.1405	419	0.9441	28.9791	337	0.9548	26.4402	467	0.9722	33.1522	392	0.9491	27.4164	407	0.9435	29.5159	427	0.9727	31.31	391	0.9674	29.1781	459	0.966	36.2188	391	0.9677	31.5155
ENSRNOG00000015869	Pccb	2074	185	0.8197	24.9596	353	0.8973	43.5089	278	0.8582	36.4437	54	0.6741	6.4089	54	0.634	7.27021	54	0.6784	6.57822	333	0.8881	39.9657	306	0.8674	38.0805	323	0.8799	40.6422	294	0.8674	37.6485	378	0.8886	51.1838	268	0.8568	37.0682
ENSRNOG00000012865	Parp3	2092	185	0.9092	24.7449	242	0.9278	29.571	163	0.957	21.1842	237	0.9603	27.8859	213	0.9474	28.4302	193	0.956	23.3088	184	0.9689	21.8932	243	0.9747	29.9802	209	0.9254	26.0716	177	0.9293	22.4709	216	0.9818	28.9962	167	0.9436	22.8998
ENSRNOG00000020659	Mrpl4	1570	184	0.7713	32.7939	230	0.9064	37.449	201	0.8841	34.8083	241	0.9064	37.7847	193	0.8567	34.3257	206	0.8841	33.1506	226	0.8911	35.8312	194	0.8573	31.8928	227	0.9057	37.7319	181	0.8618	30.6188	210	0.8892	37.5637	187	0.8994	34.1679
ENSRNOG00000006756	Maged1	2796	184	0.8355	18.4143	291	0.8863	26.6053	171	0.8029	16.6282	307	0.8891	27.0271	248	0.8974	24.7672	216	0.9077	19.5182	241	0.9056	21.4552	287	0.8906	26.4932	242	0.9152	22.5871	229	0.887	21.7524	303	0.9045	30.4337	181	0.8873	18.5702
ENSRNOG00000037505	Ulk1	4889	184	0.7265	10.5311	169	0.7948	8.83647	109	0.6294	6.06168	237	0.8419	11.9324	162	0.7601	9.25246	149	0.6584	7.69998	186	0.722	9.46989	174	0.7198	9.18585	170	0.7269	9.07427	194	0.8096	10.5388	185	0.7026	10.6268	156	0.7145	9.15336
ENSRNOG00000005804	Eif3d	1845	184	0.897	27.9059	300	0.9816	41.5659	244	0.9767	35.9567	287	0.9382	38.2899	255	0.9377	38.5928	294	0.9789	40.2601	245	0.9642	33.0538	309	0.9702	43.2267	297	0.9848	42.0091	236	0.9837	33.9723	301	0.968	45.8162	245	0.9507	38.093
ENSRNOG00000020432	Cic	5429	184	0.6567	9.4836	129	0.6329	6.0741	105	0.5975	5.25843	186	0.7353	8.43318	130	0.5948	6.6863	105	0.6023	4.88644	151	0.6594	6.92324	121	0.6156	5.75249	130	0.6727	6.24894	171	0.7395	8.36537	117	0.6113	6.05223	123	0.6136	6.49922
ENSRNOG00000015290	Tpi1	1380	184	0.4457	37.309	595	0.4449	110.217	665	0.4457	131.017	399	0.4457	71.1692	336	0.4449	67.9864	464	0.4797	84.9498	535	0.4442	96.4999	560	0.4442	104.737	609	0.4457	115.165	537	0.4891	103.348	639	0.4457	130.038	657	0.4812	136.572
ENSRNOG00000021030	Usf2	1708	183	0.8326	29.9805	191	0.9344	28.5863	158	0.935	25.151	205	0.9186	29.5437	158	0.9174	25.8304	203	0.945	30.0284	182	0.8847	26.5238	141	0.9151	21.307	177	0.9374	27.0438	170	0.9315	26.4344	196	0.9578	32.2268	179	0.8829	30.0636
ENSRNOG00000013987	Sbno2	4826	183	0.6948	10.6106	233	0.7785	12.3419	185	0.7482	10.4225	321	0.8748	16.3725	198	0.7696	11.4562	238	0.8417	12.4599	263	0.7915	13.565	242	0.8212	12.9425	241	0.8293	13.032	225	0.7571	12.3824	247	0.815	14.3734	228	0.7731	13.5526
ENSRNOG00000018232	Srf	4104	183	0.6006	12.4773	230	0.7978	14.3263	203	0.7571	13.4485	315	0.8501	18.893	185	0.7734	12.5871	210	0.7978	12.9281	250	0.8241	15.163	214	0.8606	13.4585	209	0.8367	13.2899	194	0.7478	12.5546	213	0.8241	14.5754	193	0.7661	13.4904
ENSRNOG00000012026	Psmc2	1462	183	0.9562	35.0251	382	0.9713	66.7926	373	0.9658	69.3662	374	0.974	62.9684	354	0.9754	67.6111	373	0.9788	64.4592	62	0.7996	10.5559	62	0.7955	10.9455	62	0.8256	11.0669	326	0.9679	59.2215	388	0.9856	74.5304	339	0.9631	66.5163
ENSRNOG00000008279	Mrps15	2200	183	0.5464	23.2757	239	0.6164	27.7707	239	0.6045	29.5367	219	0.6259	24.503	189	0.5855	23.9884	293	0.6527	33.6487	212	0.6595	23.9864	212	0.6745	24.8716	282	0.7291	33.451	192	0.5164	23.1786	245	0.6591	31.2747	215	0.5468	28.0344
ENSRNOG00000013533	Acin1	4619	183	0.7099	11.0861	224	0.7636	12.3969	155	0.7755	9.12368	276	0.8959	14.7082	180	0.8008	10.8814	185	0.7621	10.1192	253	0.8352	13.634	216	0.8218	12.0697	202	0.7954	11.4126	237	0.822	13.6273	242	0.8093	14.7135	183	0.7335	11.3653
ENSRNOG00000005330	Crebbp	7506	183	0.5687	6.82209	172	0.5935	5.85777	108	0.435	3.91203	124	0.5209	4.06641	80	0.3729	2.97607	65	0.3092	2.1879	150	0.603	4.97433	149	0.5711	5.12351	130	0.5321	4.51979	14	0.0914	0.495369	15	0.0915	0.561218	14	0.083	0.535051
ENSRNOG00000001170	Cox6a1	549	182	0.867	92.7629	409	0.9818	190.442	533	0.9745	263.962	375	0.9563	168.135	314	0.9381	159.705	605	0.969	278.424	374	0.9435	169.571	394	0.9435	185.231	596	0.9599	283.307	328	0.9617	158.676	422	0.98	215.869	466	0.9745	243.495
ENSRNOG00000018233	Gas6	2536	182	0.849	20.0816	296	0.9432	29.837	272	0.9286	29.1613	338	0.9696	32.8069	252	0.9795	27.7468	348	0.9815	34.67	266	0.955	26.1087	302	0.9598	30.736	324	0.9917	33.341	312	0.9594	32.6749	344	0.983	38.0942	313	0.9472	35.4055
ENSRNOG00000009063	Dnajc15	780	182	0.7179	65.2908	244	0.7821	79.9664	275	0.7628	95.8572	179	0.7756	56.4881	180	0.7385	64.4377	277	0.7962	89.724	202	0.8154	64.4628	191	0.7577	63.2017	271	0.7705	90.6688	165	0.7654	56.1821	226	0.8167	81.3698	239	0.7679	87.8981
ENSRNOG00000018677	Akt2	1984	182	0.8311	25.6688	183	0.8614	23.5788	160	0.8906	21.9263	256	0.8856	31.7612	157	0.8715	22.0963	156	0.8438	19.8658	165	0.8579	20.7012	193	0.8851	25.1076	199	0.8669	26.1755	181	0.8392	24.2296	173	0.8684	24.488	171	0.8841	24.7247
ENSRNOG00000013011	Dnajb4	1476	182	0.8211	34.5033	449	0.8442	77.7628	227	0.7846	41.8144	452	0.8374	75.379	421	0.8794	79.6449	297	0.8645	50.8386	432	0.8706	72.8534	455	0.8232	79.5638	320	0.8516	56.5779	30	0.5454	5.39814	30	0.6043	5.708	30	0.5332	5.83057
ENSRNOG00000002229	Adcy5	4850	182	0.7303	10.5004	304	0.8977	16.023	200	0.8126	11.2118	355	0.8977	18.0171	270	0.8722	15.5448	211	0.8085	10.9917	309	0.8416	15.8588	272	0.8031	14.475	288	0.9169	15.4965	311	0.8515	17.0305	290	0.8606	16.7921	236	0.8089	13.9587
ENSRNOG00000018453	Nop2	2544	182	0.7547	20.0184	167	0.8691	16.7808	139	0.8141	14.8554	185	0.9442	17.9	143	0.8947	15.6957	189	0.9108	18.7702	165	0.8585	16.1443	183	0.9108	18.5663	194	0.9017	19.9007	18	0.3168	1.87916	18	0.3027	1.98703	18	0.252	2.0297
ENSRNOG00000013604	GPX4	759	181	0.6416	66.7286	401	0.7602	135.056	528	0.8551	189.138	125	0.7088	40.5384	125	0.7115	45.9865	125	0.7036	41.6094	340	0.7931	111.504	359	0.7708	122.08	471	0.7958	161.943	372	0.7431	130.17	428	0.7945	158.362	448	0.7365	169.322
ENSRNOG00000008569	Ndufa6	517	181	0.9439	97.9633	522	0.9691	258.102	708	0.9807	372.331	451	0.9903	214.726	419	0.9691	226.301	799	0.9749	390.463	459	0.9749	220.991	500	0.9807	249.614	733	0.9749	369.995	431	0.9807	221.409	600	0.9749	325.919	637	0.9768	353.447
ENSRNOG00000014765	Vapa	1604	181	0.8809	31.5754	340	0.9963	54.186	309	0.9763	52.377	337	0.99	51.7159	305	0.9757	53.0955	356	0.9788	56.075	342	0.9963	53.073	330	0.9788	53.1007	353	0.9863	57.4319	21	0.452	3.47715	21	0.452	3.67675	21	0.4582	3.7557
ENSRNOG00000020233	Rabac1	831	181	0.941	60.9471	303	0.9771	93.2081	228	0.9338	74.5968	270	0.9916	79.9762	214	0.9759	71.9076	257	0.9771	78.1368	225	0.9747	67.3959	221	0.9458	68.6407	272	0.9759	85.4183	223	0.9759	71.271	290	0.9603	98.0045	209	0.9386	72.1475
ENSRNOG00000012623	Arf4	1676	181	0.7506	30.219	252	0.9397	38.436	205	0.9338	33.2557	243	0.9636	35.6887	214	0.9541	35.6535	240	0.9588	36.1793	227	0.9183	33.7135	221	0.9397	34.0337	235	0.9696	36.5912	203	0.9159	32.1685	247	0.9618	41.3878	196	0.9463	33.5473
ENSRNOG00000020412	Sf3b2	3218	181	0.7924	15.7387	293	0.9472	23.2752	251	0.9385	21.2068	372	0.954	28.4548	284	0.8732	24.643	278	0.8698	21.8264	314	0.8984	24.2882	326	0.9083	26.147	319	0.8922	25.8695	285	0.9369	23.5216	336	0.9341	29.3226	287	0.9285	25.5842
ENSRNOG00000021047	Lrrfip2	1811	180	0.7731	27.8118	237	0.8504	33.4535	161	0.8526	24.171	228	0.8537	30.9895	208	0.8443	32.0706	205	0.8277	28.5995	223	0.8493	30.6506	237	0.8664	33.7769	216	0.8128	31.1256	224	0.8404	32.8502	256	0.8548	39.6982	173	0.8377	27.4033
ENSRNOG00000019333	Hipk1	7894	180	0.4977	6.38044	237	0.7042	7.67473	185	0.6311	6.37178	257	0.7268	8.01372	237	0.7059	8.38327	208	0.6553	6.65717	261	0.6381	8.22992	269	0.7147	8.79519	275	0.7475	9.09114	268	0.7532	9.01668	265	0.7371	9.42753	204	0.6696	7.41326
ENSRNOG00000028717	Ndufb7	537	180	0.9572	93.7937	454	0.9702	216.119	542	0.9832	274.417	423	0.9907	193.894	399	0.9832	207.473	615	0.9888	289.351	393	0.9944	182.167	419	0.9702	201.386	557	0.9888	270.685	352	0.9609	174.091	601	0.9665	314.304	473	0.9553	252.675
ENSRNOG00000000867	Vars	3980	179	0.7198	12.5848	296	0.9073	19.0117	230	0.8271	15.712	321	0.9485	19.8527	221	0.9018	15.505	243	0.9083	15.4258	284	0.9193	17.7618	275	0.9236	17.8336	284	0.9304	18.6217	256	0.8917	17.0831	313	0.9523	22.0857	264	0.9053	19.0282
ENSRNOG00000011425	Ptpn3	4002	179	0.5747	12.5156	194	0.8036	12.3919	105	0.6277	7.13344	267	0.8003	16.4222	182	0.7294	12.6986	145	0.7034	9.15407	207	0.7081	12.8749	243	0.8411	15.6718	152	0.7239	9.91173	152	0.6732	10.0873	235	0.7681	16.4907	124	0.6429	8.88834
ENSRNOG00000019529	Btbd1	3004	179	0.6891	16.6736	407	0.9211	34.6343	359	0.9717	32.4923	450	0.9557	36.8732	343	0.9311	31.8828	373	0.9511	31.3713	416	0.9634	34.4703	419	0.9587	36.0002	405	0.9617	35.1834	401	0.9161	35.453	382	0.9571	35.7119	312	0.9025	29.7941
ENSRNOG00000008961	Mapre3	1807	179	0.8129	27.7185	155	0.8738	21.9273	152	0.8888	22.8703	181	0.9032	24.6558	122	0.8777	18.8523	130	0.9225	18.1764	150	0.8783	20.6626	120	0.8069	17.1401	161	0.8854	23.2515	125	0.8877	18.3722	162	0.8744	25.1771	127	0.9048	20.1614
ENSRNOG00000010489	Samd4a	2240	179	0.7902	22.3604	117	0.7411	13.3521	89	0.7455	10.8026	175	0.8027	19.2304	99	0.8027	12.341	106	0.7973	11.9559	142	0.8018	15.7795	126	0.7438	14.5182	118	0.7554	13.7473	128	0.775	15.1765	143	0.8187	17.9282	95	0.6982	12.1661
ENSRNOG00000020499	Scaf1	3777	179	0.6992	13.2612	173	0.8292	11.7088	157	0.8102	11.3016	226	0.8877	14.7285	154	0.784	11.3851	162	0.7646	10.8366	200	0.7903	13.1806	185	0.8178	12.642	197	0.8994	13.6114	166	0.7787	11.6727	198	0.8239	14.722	167	0.8155	12.6837
ENSRNOG00000036814	Atp6v0a1	3849	179	0.6391	13.0131	183	0.8285	12.1539	169	0.8462	11.9378	234	0.9044	14.9646	192	0.8064	13.9289	173	0.8031	11.3559	191	0.8524	12.352	196	0.874	13.1431	146	0.8093	9.89892	202	0.8696	13.9384	204	0.8314	14.8844	180	0.8025	13.4153
ENSRNOG00000050646	Fem1a	1965	179	0.9059	25.4898	276	0.9908	35.9053	199	0.9669	27.5345	356	0.9903	44.5949	206	0.9639	29.273	234	0.9522	30.0869	291	0.9364	36.8623	269	0.9634	35.333	235	0.9674	31.2096	251	0.9608	33.925	307	0.9634	43.8758	188	0.9425	27.4455
ENSRNOG00000010379	Celf1	4609	179	0.6364	10.8673	291	0.9258	16.1398	199	0.7839	11.739	338	0.8859	18.0513	269	0.8802	16.297	237	0.9034	12.9917	286	0.908	15.4458	300	0.8995	16.7998	249	0.8603	14.0986	300	0.9019	17.2872	287	0.9156	17.4874	236	0.8783	14.6886
ENSRNOG00000013052	Bclaf1	4938	179	0.483	10.1433	254	0.534	13.1491	156	0.4737	8.58934	297	0.5067	14.8048	248	0.5081	14.0237	176	0.5026	9.00503	264	0.499	13.3078	243	0.5267	12.7012	226	0.4656	11.9437	247	0.5407	13.2848	235	0.5227	13.3649	172	0.464	9.99202
ENSRNOG00000012957	Sh3glb1	1769	179	0.8739	28.3139	563	0.9276	81.3566	543	0.9531	83.4562	428	0.9621	59.5544	341	0.8745	53.8256	445	0.9768	63.5559	57	0.6829	8.02046	57	0.6959	8.31644	57	0.671	8.40872	35	0.5636	5.25471	35	0.5862	5.55635	35	0.5263	5.67566
ENSRNOG00000026742	Ypel5	2113	178	0.8135	23.572	322	0.9707	38.9555	292	0.955	37.5725	335	0.955	39.0251	300	0.9404	39.6446	319	0.9711	38.143	49	0.6389	5.7723	49	0.6242	5.98531	49	0.5911	6.05173	343	0.9688	43.1125	325	0.9886	43.195	282	0.9522	38.2847
ENSRNOG00000026985	Phldb1	5392	178	0.6595	9.23731	222	0.8162	10.5248	156	0.6912	7.86613	270	0.8266	12.3257	203	0.7552	10.5126	202	0.7277	9.46509	199	0.7519	9.18661	242	0.8168	11.5839	245	0.8092	11.8577	193	0.7381	9.50641	224	0.7941	11.6667	229	0.7864	12.1832
ENSRNOG00000000847	Csnk2b	934	178	0.7923	53.3271	274	0.9625	74.9922	281	0.9604	81.7986	252	0.9754	66.4128	239	0.9604	71.4518	275	0.9615	74.3891	263	0.9657	70.0908	254	0.9872	70.1903	268	0.9657	74.8809	17	0.5278	4.83405	17	0.4679	5.11153	17	0.5182	5.22129
ENSRNOG00000019850	Speg	10940	178	0.3655	4.55279	194	0.4198	4.53311	153	0.3525	3.80242	204	0.4429	4.58998	189	0.4498	4.82399	211	0.4178	4.87291	184	0.4389	4.18652	192	0.462	4.52975	189	0.4447	4.50845	193	0.4937	4.68542	202	0.5098	5.18541	182	0.3889	4.77233
ENSRNOG00000011352	Furin	4264	177	0.6726	11.6153	199	0.8382	11.9302	170	0.7706	10.8397	268	0.8628	15.4709	165	0.7631	10.8051	181	0.8119	10.7247	200	0.7864	11.6752	206	0.8091	12.4692	161	0.7446	9.85353	22	0.2141	1.3703	22	0.1963	1.44895	22	0.2183	1.48007
ENSRNOG00000014637	Atxn10	1808	177	0.9364	27.3937	403	0.9972	56.9795	316	0.9994	47.5199	420	0.9989	57.1806	257	0.9945	39.6914	393	0.9983	54.9184	336	0.9895	46.2587	373	0.995	53.2477	360	0.9994	51.9621	317	0.9972	46.5661	383	0.9978	59.4908	330	0.9923	52.359
ENSRNOG00000006939	Ndufa7	511	177	0.9119	96.9232	459	0.9295	229.617	516	0.9785	274.546	356	0.9315	171.485	317	0.9511	173.221	565	0.9315	279.351	330	0.9569	160.748	325	0.9335	164.154	524	0.9315	267.604	319	0.9256	165.798	360	0.9315	197.848	464	0.9354	260.479
ENSRNOG00000017852	Nars	2612	177	0.8511	18.9616	424	0.9939	41.4959	313	0.99	32.5805	442	0.9923	41.6531	367	0.9518	39.2333	338	0.9575	32.6939	398	0.9705	37.9282	459	0.9835	45.3555	379	0.9835	37.866	342	0.9904	34.7746	457	0.9912	49.1351	313	0.9812	34.3754
ENSRNOG00000013516	Sf3b1	4954	176	0.6837	9.94104	426	0.8367	21.9819	289	0.8046	15.8609	458	0.8585	22.7566	407	0.8133	22.9404	342	0.8072	17.4419	431	0.8246	21.6558	475	0.8674	24.7473	356	0.821	18.7533	391	0.8226	20.9619	495	0.8623	28.0607	341	0.8044	19.7458
ENSRNOG00000006444	Fkbp4	2845	176	0.6858	17.3103	306	0.8063	27.4948	318	0.7754	30.39	326	0.812	28.2055	254	0.767	24.9295	358	0.8158	31.7925	255	0.7701	22.3105	337	0.8225	30.573	353	0.8207	32.3799	258	0.7933	24.085	332	0.8408	32.7722	308	0.8039	31.0559
ENSRNOG00000023095	Npepps	4102	175	0.7292	11.9376	323	0.8801	20.1289	224	0.8786	14.847	231	0.8737	13.8616	199	0.8011	13.5463	174	0.7862	10.7171	35	0.2894	2.12385	35	0.3364	2.20223	35	0.3101	2.22667	22	0.2333	1.42441	22	0.2326	1.50618	22	0.2177	1.53852
ENSRNOG00000045843	Rusc2	4545	175	0.655	10.7741	212	0.8273	11.9238	129	0.7221	7.71689	251	0.8473	13.5937	186	0.8163	11.4272	159	0.785	8.83867	209	0.875	11.4463	184	0.8101	10.449	165	0.8176	9.47399	180	0.8059	10.5183	209	0.833	12.914	136	0.6766	8.58383
ENSRNOG00000043447	Qars	2769	175	0.7548	17.6844	294	0.8545	27.1417	222	0.8313	21.798	311	0.8837	27.6462	211	0.827	21.2775	265	0.8628	24.1794	246	0.853	22.1139	259	0.8678	24.1417	281	0.8704	26.483	242	0.8725	23.2114	269	0.857	27.2821	229	0.8519	23.724
ENSRNOG00000018994	Psmc4	1390	175	0.9583	35.2289	263	0.9871	48.3674	239	0.9583	46.7487	273	0.9921	48.3444	232	0.9849	46.6053	256	0.9525	46.5317	232	0.9799	41.5456	251	0.9813	46.6068	256	0.9942	48.0627	231	0.9842	44.1373	298	0.9906	60.2075	231	0.9763	47.6731
ENSRNOG00000010353	Dnajb6	2449	175	0.7746	19.9951	212	0.8563	22.1289	163	0.8016	18.0961	249	0.8996	25.027	189	0.8093	21.5494	236	0.8738	24.3471	221	0.8942	22.4624	209	0.8922	22.0266	212	0.8583	22.5907	187	0.8563	20.2797	243	0.8763	27.8655	212	0.8665	24.8326
ENSRNOG00000020299	Klc2	2918	175	0.8595	16.7814	208	0.9421	18.2218	170	0.8677	15.8398	240	0.9424	20.2453	143	0.7978	13.684	179	0.8753	15.4986	188	0.8101	16.0371	177	0.8444	15.6559	218	0.9119	19.4964	184	0.9037	16.7472	174	0.8033	16.7461	126	0.7663	12.3869
ENSRNOG00000020347	Nup98	6595	175	0.5635	7.42503	198	0.6948	7.67472	165	0.6499	6.8023	267	0.7186	9.9654	197	0.7145	8.34091	180	0.6878	6.89574	202	0.6737	7.6241	203	0.697	7.94459	156	0.6309	6.17295	16	0.1058	0.644339	16	0.1114	0.681325	16	0.1101	0.695955
ENSRNOG00000020336	Ezh1	4245	174	0.6459	11.4696	192	0.7623	11.5621	123	0.6971	7.87796	245	0.873	14.2065	184	0.7741	12.1033	156	0.7402	9.28475	208	0.8179	12.1966	217	0.8561	13.1939	164	0.7795	10.0821	186	0.8238	11.6371	217	0.8721	14.3559	144	0.7362	9.73107
ENSRNOG00000016443	Vps13d	15197	174	0.3428	3.20381	207	0.4238	3.48197	147	0.3218	2.62994	280	0.5119	4.53522	208	0.4224	3.8218	184	0.3714	3.05903	264	0.4835	4.32413	275	0.4908	4.67052	220	0.4471	3.77788	265	0.4792	4.63124	206	0.4234	3.80679	166	0.3479	3.13347
ENSRNOG00000002749	Spag9	7313	174	0.5032	6.65777	274	0.79	9.57783	205	0.7061	7.62158	360	0.8306	12.1173	296	0.7941	11.3021	292	0.7897	10.0881	298	0.8032	10.1432	287	0.7838	10.1292	280	0.7628	9.99184	293	0.808	10.641	336	0.7958	12.9031	280	0.7405	10.9834
ENSRNOG00000006949	C1qbp	1133	174	0.9391	42.9729	422	0.9797	95.2127	421	0.9903	101.027	403	0.9903	87.5535	357	0.9771	87.9833	486	0.9885	108.375	353	0.9965	77.5527	404	0.9859	92.0326	424	0.9841	97.6605	409	0.9929	95.8743	399	0.9938	98.8991	395	0.9859	100.01
ENSRNOG00000019987	Scand1	766	174	0.7898	63.5617	167	0.7572	55.7314	191	0.7624	67.794	159	0.7624	51.0936	126	0.765	45.9308	202	0.7676	66.6264	160	0.8055	51.9928	145	0.795	48.8573	172	0.7598	58.598	138	0.7311	47.8475	205	0.7676	75.1578	154	0.7389	57.6724
ENSRNOG00000031092	Rock1	4459	174	0.7042	10.9191	339	0.8814	19.4345	207	0.7605	12.6217	344	0.8688	18.9897	311	0.8488	19.4753	239	0.8125	13.542	314	0.8744	17.5285	317	0.8901	18.349	215	0.7481	12.583	367	0.9217	21.8594	384	0.9231	24.1848	239	0.821	15.3758
ENSRNOG00000030247	Ankhd1	8103	174	0.5014	6.00867	154	0.536	4.85833	111	0.4148	3.72446	222	0.6756	6.74381	146	0.5377	5.03117	124	0.4665	3.86633	188	0.6099	5.77516	123	0.4691	3.91787	135	0.5429	4.34781	172	0.6011	5.63756	152	0.5345	5.26801	125	0.4898	4.42527
ENSRNOG00000049066	Mrfap1	1546	174	0.8855	31.4931	561	0.9761	92.761	420	0.9392	73.8629	499	0.9599	79.4491	420	0.9651	75.8581	514	0.9858	83.9996	481	0.9722	77.444	523	0.9644	87.3137	489	0.9877	82.5434	458	0.9741	78.6801	567	0.9592	102.997	429	0.9508	79.602
ENSRNOG00000012868	Uaca	4422	173	0.6895	10.9472	247	0.8259	14.2788	161	0.725	9.89905	280	0.8532	15.5861	269	0.8451	16.9862	214	0.82	12.227	243	0.8207	13.6785	277	0.8682	16.1678	239	0.872	14.1046	258	0.8544	15.4957	280	0.8738	17.7823	208	0.8725	13.4934
ENSRNOG00000007492	Rpn2	2234	173	0.8572	21.669	324	0.9709	37.0744	265	0.9803	32.2514	308	0.9857	33.9364	241	0.9602	30.1228	268	0.9584	30.3092	287	0.983	31.978	280	0.9624	32.3493	273	0.9611	31.8906	284	0.9812	33.7632	324	0.9803	40.7297	298	0.9906	38.2656
ENSRNOG00000038044	Tsc22d2	4598	173	0.4854	10.5282	278	0.7605	15.4557	224	0.7379	13.2454	328	0.7653	17.5591	330	0.7808	20.0404	267	0.7495	14.6712	292	0.7821	15.8076	345	0.7425	19.366	247	0.7279	14.0188	289	0.7538	16.6931	285	0.741	17.407	206	0.712	12.8521
ENSRNOG00000046705	Snx3	931	173	0.7895	51.9962	184	0.9334	50.522	163	0.8829	47.6019	212	0.898	56.0511	188	0.826	56.3859	178	0.8657	48.3052	162	0.8324	43.3129	160	0.9366	44.3568	169	0.8829	47.3718	174	0.942	49.6373	204	0.8947	61.5361	151	0.898	46.5268
ENSRNOG00000019152	Trpc4ap	3145	172	0.8359	15.3032	358	0.9275	29.0988	294	0.8757	25.4164	453	0.9638	35.4549	320	0.9428	28.4113	325	0.9342	26.1088	363	0.9587	28.7302	370	0.9631	30.3649	368	0.951	30.5359	347	0.9409	29.3034	405	0.9657	36.1646	282	0.9339	25.722
ENSRNOG00000006247	Copa	4374	172	0.7154	11.0033	340	0.9136	19.8707	262	0.7796	16.2858	382	0.8992	21.4972	297	0.8921	18.9601	290	0.8569	16.7511	304	0.8605	17.3	352	0.9419	20.7708	306	0.8832	18.2568	300	0.8845	18.2159	354	0.8948	22.7287	273	0.8589	17.9044
ENSRNOG00000025528	Efr3a	5309	172	0.5766	9.06548	430	0.8821	20.7046	341	0.8593	17.4634	477	0.9254	22.1159	378	0.8591	19.8811	356	0.913	16.9418	362	0.8885	16.9726	424	0.8975	20.6131	364	0.8768	17.8925	423	0.9205	21.161	395	0.9045	20.8946	335	0.854	18.1012
ENSRNOG00000018698	Wac	1857	172	0.7927	25.9174	158	0.8029	21.7499	110	0.7377	16.1052	209	0.8169	27.7034	151	0.8008	22.7053	123	0.7884	16.7347	159	0.8158	21.3126	153	0.8013	21.2652	140	0.7911	19.6743	188	0.8115	26.8878	141	0.7959	21.3234	117	0.7555	18.0738
ENSRNOG00000001448	Hip1	7376	172	0.5667	6.52503	238	0.7317	8.24837	174	0.6318	6.41379	247	0.771	8.24279	225	0.7478	8.51773	221	0.7396	7.56998	227	0.694	7.6605	248	0.7854	8.67803	241	0.7621	8.52666	210	0.6696	7.56149	276	0.7785	10.5084	204	0.7065	7.93387
ENSRNOG00000010286	Cast	4619	172	0.5289	10.4197	284	0.8863	15.7175	213	0.7668	12.5377	344	0.8731	18.3319	271	0.845	16.3826	256	0.8575	14.0028	290	0.9004	15.628	307	0.8643	17.1546	250	0.845	14.1246	271	0.8528	15.5823	317	0.8943	19.2735	216	0.8355	13.4147
ENSRNOG00000014670	Zmynd11	4036	172	0.7004	11.9248	264	0.8959	16.7211	167	0.7852	11.25	326	0.9175	19.8822	258	0.9051	17.8497	228	0.8972	14.2727	297	0.891	18.3171	301	0.917	19.2489	257	0.8682	16.6175	251	0.885	16.517	270	0.894	18.7872	233	0.861	16.5608
ENSRNOG00000002115	Sod1	650	172	0.9215	74.0441	606	0.9477	238.326	589	0.9723	246.37	489	0.9431	185.18	413	0.9308	177.418	610	0.9692	237.105	452	0.9277	173.092	478	0.9523	189.804	582	0.9769	233.664	50	0.8969	20.4299	50	0.8692	21.6026	50	0.84	22.0665
ENSRNOG00000008027	Murc	1089	171	0.9862	43.9383	211	0.9807	49.5298	167	0.9642	41.6941	338	0.9789	76.3989	214	0.9624	54.8716	203	0.9467	47.0968	270	0.9789	61.7146	317	0.9807	75.1314	246	0.978	58.9509	247	0.9945	60.239	283	0.9633	72.9807	183	0.9798	48.2058
ENSRNOG00000010048	Dctn1	4414	171	0.662	10.8402	248	0.8222	14.3625	184	0.7451	11.3337	303	0.8466	16.897	239	0.8002	15.1192	235	0.7834	13.4511	265	0.8296	14.944	265	0.826	15.4954	285	0.8387	16.8498	218	0.7864	13.117	307	0.8462	19.5324	216	0.8213	14.0377
ENSRNOG00000009887	Arih1	5112	171	0.5591	9.3601	378	0.8564	18.9022	218	0.8251	11.5945	343	0.8656	16.5159	292	0.8251	15.9498	279	0.811	13.7891	278	0.8024	13.5365	313	0.8218	15.8032	280	0.8564	14.2939	294	0.8038	15.2744	339	0.8633	18.6234	226	0.76	12.6822
ENSRNOG00000011884	Golga2	4350	171	0.7147	10.9997	230	0.8731	13.5161	164	0.7575	10.2504	296	0.8857	16.7495	252	0.8991	16.1761	202	0.8087	11.7324	220	0.8494	12.5888	237	0.8798	14.0621	213	0.8349	12.7783	245	0.888	14.9584	294	0.9149	18.9805	185	0.8211	12.2
ENSRNOG00000001762	Pcyt1a	4300	171	0.7123	11.1276	257	0.8942	15.2784	178	0.8407	11.2548	397	0.9619	22.7259	231	0.8453	15.0005	196	0.8837	11.5162	286	0.8865	16.5558	265	0.9014	15.9062	240	0.9	14.5655	304	0.9414	18.7765	278	0.9193	18.1562	191	0.8221	12.7421
ENSRNOG00000015953	Oaz2	1804	171	0.7517	26.5237	260	0.9728	36.8425	208	0.959	31.3483	262	0.9595	35.7489	214	0.9523	33.1237	244	0.9451	34.1725	39	0.5732	5.38121	39	0.5937	5.5798	39	0.6297	5.64171	23	0.4435	3.3861	23	0.464	3.58047	23	0.4795	3.65736
ENSRNOG00000010737	Mbnl2	1797	171	0.882	26.6271	161	0.9449	22.9029	130	0.9249	19.669	212	0.9405	29.0393	161	0.9254	25.0173	129	0.8486	18.137	168	0.9193	23.2709	173	0.936	24.8478	130	0.9009	18.879	159	0.8843	23.4995	171	0.9549	26.7237	149	0.9299	23.7856
ENSRNOG00000043350	Cap2	1636	171	0.9383	29.2475	198	0.9762	30.9381	158	0.9615	26.2579	286	0.9615	43.0309	163	0.9462	27.8206	175	0.97	27.0258	211	0.978	32.1034	180	0.9798	28.3975	196	0.9933	31.2648	188	0.9682	30.5199	190	0.9927	32.6152	155	0.9768	27.1784
ENSRNOG00000012148	Trio	9315	170	0.5009	5.10671	196	0.5875	5.3788	126	0.4081	3.67768	281	0.7006	7.42543	213	0.6081	6.38497	169	0.5572	4.58382	244	0.666	6.52017	198	0.6237	5.48621	198	0.5611	5.54709	225	0.6367	6.41518	177	0.5406	5.33629	142	0.489	4.37302
ENSRNOG00000049531	Usp19	4520	170	0.6918	10.5241	274	0.8827	15.4962	230	0.8139	13.8349	359	0.9646	19.5503	248	0.8434	15.3206	269	0.8927	15.0362	310	0.9137	17.0716	285	0.9235	16.2741	298	0.9263	17.2052	302	0.9188	17.7451	342	0.933	21.2489	275	0.8615	17.453
ENSRNOG00000011302	Rab11a	2262	170	0.4346	21.0296	222	0.8059	25.0884	151	0.7149	18.1498	187	0.832	20.3492	174	0.8298	21.4792	204	0.8736	22.7856	184	0.8073	20.2478	212	0.8683	24.1899	158	0.7423	18.2284	185	0.8232	21.7214	220	0.8784	27.3136	168	0.8307	21.3055
ENSRNOG00000012658	Pdlim3	1588	170	0.8703	29.9553	321	0.9887	51.6734	260	0.9377	44.5153	276	0.9647	42.7816	256	0.9824	45.0144	268	0.9893	42.6391	290	0.9704	45.4569	249	0.9849	40.4706	272	0.9836	44.6994	252	0.966	42.1463	304	0.9798	53.7616	268	0.9377	48.4128
ENSRNOG00000009266	Anp32b	1192	170	0.8633	39.9069	177	0.9312	37.9585	174	0.8926	39.688	181	0.9463	37.3767	181	0.9413	42.3999	187	0.9421	39.6359	166	0.8817	34.6644	205	0.9144	44.3882	218	0.9513	47.7269	221	0.9312	49.2408	230	0.9471	54.1877	187	0.9497	45.003
ENSRNOG00000025459	Mars	2783	170	0.7215	17.0927	295	0.9813	27.097	175	0.8732	17.0967	331	0.963	29.2761	252	0.9041	25.2842	234	0.9181	21.2435	297	0.9368	26.5641	306	0.9626	28.3791	247	0.9439	23.1615	267	0.9666	25.4804	311	0.9759	31.3831	202	0.8843	20.8216
ENSRNOG00000017023	Tcf25	2199	170	0.8899	21.6321	275	0.9873	31.9683	205	0.9636	25.3463	276	0.9859	30.8946	201	0.96	25.5231	215	0.9804	24.7023	231	0.9536	26.148	227	0.9723	26.6435	265	0.9736	31.4488	189	0.9536	22.8268	274	0.9768	34.9925	223	0.965	29.0908
ENSRNOG00000020288	Slc25a20	1754	170	0.894	27.1203	374	0.9652	54.5072	294	0.9418	45.5726	213	0.9532	29.8915	200	0.951	31.8392	223	0.9572	32.1217	47	0.6847	6.66992	47	0.703	6.91606	47	0.6317	6.9928	27	0.5211	4.0883	27	0.5331	4.32298	27	0.545	4.41581
ENSRNOG00000001862	Ube2l3	1644	169	0.6995	28.7647	267	0.8996	41.5166	215	0.9167	35.5568	269	0.9094	40.2762	212	0.8893	36.0078	235	0.9179	36.1152	236	0.8686	35.7324	229	0.9118	35.9521	250	0.899	39.6845	185	0.9027	29.8868	251	0.9203	42.8767	221	0.8905	38.5626
ENSRNOG00000004093	Rhot1	2913	169	0.7563	16.2338	262	0.9396	22.9918	197	0.9272	18.3871	343	0.9828	28.9836	243	0.9258	23.2931	207	0.8771	17.9537	273	0.944	23.3278	256	0.9557	22.6824	217	0.9447	19.4403	286	0.9918	26.0756	231	0.9337	22.27	171	0.9107	16.8396
ENSRNOG00000017446	Ndufs8	748	169	0.9893	63.2209	414	0.996	141.485	528	0.9973	191.919	390	0.996	128.34	322	0.9947	120.203	484	0.996	163.481	406	0.9973	135.107	344	0.9947	118.699	503	0.996	175.489	292	0.9947	103.679	431	0.988	161.817	468	0.9973	179.482
ENSRNOG00000011771	Ptp4a1	2456	169	0.6246	19.2546	468	0.7985	48.7113	314	0.7349	34.7606	448	0.7777	44.9002	368	0.7504	41.839	463	0.7858	47.6295	387	0.7989	39.2225	440	0.8046	46.2397	367	0.7537	38.9961	395	0.7862	42.7147	380	0.7598	43.4515	346	0.7235	40.4132
ENSRNOG00000007753	Plaa	4438	169	0.5653	10.6555	250	0.6539	14.4001	200	0.6996	12.2526	301	0.7476	16.6947	238	0.6796	14.9745	224	0.6516	12.7522	256	0.6413	14.3584	282	0.7032	16.4003	201	0.6555	11.8193	25	0.2334	1.4961	25	0.2048	1.58198	25	0.1987	1.61595
ENSRNOG00000020102	Sirt2	2042	169	0.7057	23.1583	296	0.8487	37.0551	262	0.809	34.8845	282	0.8051	33.9932	216	0.7884	29.5366	277	0.7693	34.2726	251	0.8002	30.5964	240	0.8834	30.3351	275	0.8071	35.1447	235	0.7894	30.5648	256	0.7953	35.2074	248	0.8217	34.8395
ENSRNOG00000006833	Rb1cc1	7197	169	0.4646	6.57068	315	0.6992	11.1885	218	0.6	8.23553	374	0.7493	12.7914	318	0.6876	12.3378	238	0.6454	8.35505	350	0.6929	12.1051	307	0.6978	11.0097	213	0.629	7.72345	362	0.7368	13.3588	388	0.7666	15.1401	217	0.6275	8.64936
ENSRNOG00000014287	Stk11	3125	169	0.6419	15.1325	227	0.8032	18.569	219	0.728	19.0538	43	0.449	3.38701	44	0.449	3.93156	45	0.4723	3.63819	200	0.7661	15.9306	245	0.8125	20.2351	242	0.8483	20.2092	222	0.8189	18.8674	265	0.8006	23.8147	202	0.7968	18.5429
ENSRNOG00000018343	Isca1	1862	169	0.8974	25.397	400	0.9936	54.9152	456	0.9968	66.5843	377	0.9855	49.8379	334	0.9748	50.0874	469	0.993	63.638	331	0.9898	44.2487	391	0.9893	54.1985	482	0.9989	67.5539	350	0.9914	49.9226	423	0.9893	63.7984	386	0.9893	59.468
ENSRNOG00000005184	Nop10	858	168	0.5128	54.7895	255	0.5536	75.974	278	0.6305	88.0935	234	0.5769	67.1316	202	0.5186	65.7395	291	0.6119	85.6898	238	0.6795	69.0465	248	0.6224	74.6027	264	0.5991	80.2971	254	0.5746	78.624	252	0.6841	82.4826	224	0.6911	74.8922
ENSRNOG00000020138	Slc4a3	3879	168	0.6906	12.1189	231	0.9278	15.2231	242	0.8069	16.9622	262	0.8925	16.6257	206	0.858	14.8289	222	0.8103	14.4596	255	0.8897	16.3634	223	0.8203	14.838	256	0.8977	17.2228	206	0.8335	14.1045	239	0.8286	17.3032	245	0.8698	18.1185
ENSRNOG00000016234	Ciapin1	4166	168	0.3973	11.2841	265	0.4277	16.2607	209	0.3985	13.64	270	0.447	15.953	185	0.4277	12.3998	233	0.4165	14.1306	237	0.4942	14.1606	194	0.4335	12.0191	206	0.4277	12.9042	249	0.4496	15.8741	226	0.3963	15.2349	179	0.4566	12.3256
ENSRNOG00000005513	Srsf5	1055	168	0.9393	44.5587	278	0.9697	67.3604	224	0.9706	57.7274	369	0.9934	86.0938	270	0.9896	71.4617	278	0.9896	66.5757	339	0.964	79.9833	347	0.9725	84.8921	256	0.9318	63.3243	285	0.9706	71.7466	347	0.946	92.369	271	0.9867	73.6873
ENSRNOG00000019181	Synpo	2931	168	0.6015	16.0387	149	0.6575	12.9952	102	0.5674	9.46174	218	0.6858	18.3079	145	0.6312	13.8138	124	0.6053	10.6888	166	0.6711	14.0976	155	0.665	13.6492	147	0.6302	13.0883	138	0.5964	12.5047	190	0.6547	18.2048	139	0.6319	13.6043
ENSRNOG00000012808	Mbrl	2052	167	0.8416	22.7727	169	0.8855	21.0534	148	0.9362	19.6097	207	0.8796	24.8308	138	0.7968	18.7786	170	0.9064	20.9312	196	0.9483	23.7756	149	0.8913	18.7413	161	0.9035	20.4754	169	0.8528	21.8735	159	0.9186	21.7605	129	0.8816	18.0338
ENSRNOG00000012157	Snrnp200	6777	167	0.6143	6.89532	297	0.7719	11.2029	218	0.6788	8.74592	354	0.8215	12.8577	258	0.779	10.6303	264	0.8132	9.84215	295	0.8188	10.8352	289	0.8192	11.0065	279	0.7953	10.7436	294	0.7815	11.5218	309	0.8424	12.8047	242	0.7192	10.2436
ENSRNOG00000011700	Ptprm	5290	167	0.6582	8.83357	142	0.6747	6.86191	147	0.6433	7.55524	194	0.742	9.02702	129	0.6106	6.8092	156	0.6992	7.45062	150	0.6764	7.0581	159	0.6569	7.75768	196	0.7794	9.66904	178	0.7418	8.93662	139	0.6469	7.37918	162	0.7501	8.78487
ENSRNOG00000016326	Cx3cl1	3063	167	0.7362	15.2561	201	0.8857	16.7749	209	0.8779	18.5518	237	0.9177	19.0458	184	0.8903	16.7739	262	0.9128	21.6111	210	0.935	17.0657	212	0.9337	17.864	257	0.9474	21.8962	188	0.8436	16.3012	233	0.9644	21.3628	266	0.953	24.9121
ENSRNOG00000013493	Psma4	1138	167	0.9596	41.0629	365	0.9868	81.9904	309	0.9877	73.8249	306	0.9886	66.1877	267	0.9851	65.5135	346	0.9877	76.817	50	0.79	10.9365	50	0.8304	11.3401	50	0.8497	11.466	26	0.6406	6.06792	26	0.6766	6.41624	26	0.6019	6.55401
ENSRNOG00000047088	Rab10	2892	167	0.7268	16.1582	356	0.9651	31.4676	248	0.9353	23.3152	331	0.9689	28.1727	293	0.9485	28.2899	306	0.9506	26.7329	281	0.9305	24.1858	318	0.9734	28.3804	281	0.9748	25.3566	303	0.9599	27.8262	336	0.9703	32.628	278	0.9509	27.5754
ENSRNOG00000008782	Pnisr	4112	166	0.5766	11.2961	245	0.7257	15.2309	174	0.651	11.5049	270	0.7451	16.1625	241	0.7067	16.3654	179	0.6447	10.9982	220	0.7378	13.3175	284	0.7313	17.8261	184	0.7065	11.6774	240	0.7162	15.5013	263	0.7162	17.9619	178	0.6659	12.4177
ENSRNOG00000017914	Prkcdbp	1057	166	0.8865	43.9449	275	0.9782	66.5074	245	0.9773	63.0199	248	0.9773	57.753	224	0.9735	59.1746	243	0.9745	58.0838	237	0.9754	55.8117	257	0.9953	62.755	289	0.9451	71.352	208	0.9735	52.2634	278	0.9792	73.8617	227	0.9518	61.6065
ENSRNOG00000012237	Rdx	3987	166	0.5977	11.6503	371	0.9034	23.787	244	0.8525	16.6391	353	0.913	21.7935	326	0.918	22.8314	280	0.8483	17.7433	310	0.8631	19.3539	366	0.916	23.6933	328	0.9132	21.4689	306	0.8605	20.3838	390	0.8716	27.4706	274	0.8666	19.7143
ENSRNOG00000015409	Usp5	3205	166	0.8727	14.4929	287	0.9382	22.8911	247	0.9569	20.9534	327	0.9707	25.1141	245	0.9473	21.3452	253	0.9485	19.9442	327	0.9791	25.3964	287	0.937	23.1124	308	0.9679	25.0787	256	0.9485	21.2139	347	0.9651	30.4054	253	0.9382	22.6448
ENSRNOG00000014162	Plekhb2	3266	166	0.7345	14.2222	357	0.9412	27.9424	352	0.9522	29.3031	400	0.9593	30.1469	386	0.9642	33.0015	370	0.9813	28.6226	357	0.9666	27.2085	401	0.951	31.6897	447	0.9917	35.7169	319	0.9776	25.9408	398	0.9709	34.2228	363	0.9645	31.8835
ENSRNOG00000015097	Kcmf1	1483	166	0.9083	31.3215	234	0.9751	40.3354	208	0.9879	38.1337	276	0.973	45.8106	246	0.9946	46.3187	272	0.9899	46.3395	259	0.9899	43.4721	249	0.9791	43.336	264	0.9831	46.4564	241	0.9852	43.1603	287	0.9885	54.3488	224	0.9643	43.3294
ENSRNOG00000003542	Hcfc1r1	324	166	0.7099	143.363	128	0.8272	100.99	163	0.8272	136.782	139	0.7346	105.601	116	0.7994	99.9712	161	0.8457	125.546	116	0.784	89.118	116	0.7685	92.4067	114	0.7747	91.8212	119	0.7099	97.5463	125	0.8395	108.346	135	0.7932	119.527
ENSRNOG00000050585	Pgam1	1804	166	0.8093	25.7482	330	0.9096	46.7616	313	0.8958	47.1731	339	0.9379	46.2553	281	0.9152	43.4943	337	0.9013	47.1973	287	0.9224	39.6002	306	0.9063	43.7799	314	0.9002	45.423	63	0.7822	9.27498	74	0.7711	11.5198	55	0.7262	8.74585
ENSRNOG00000009642	Cct4	2110	165	0.8744	21.8815	603	0.9185	73.0545	466	0.8934	60.0468	561	0.89	65.4453	489	0.8815	64.7125	597	0.9175	71.4851	488	0.9133	57.5691	562	0.8957	68.7455	546	0.9152	67.5294	478	0.8829	60.1665	579	0.9052	77.0629	444	0.9047	60.3638
ENSRNOG00000006302	Gclc	3045	165	0.7727	15.1625	208	0.8223	17.4618	187	0.9192	16.6971	42	0.4979	3.39516	42	0.4171	3.85145	42	0.4851	3.48486	255	0.9307	20.8452	233	0.9307	19.7496	203	0.8913	17.3977	233	0.912	20.3225	241	0.9442	22.2269	200	0.8998	18.8416
ENSRNOG00000014525	Hspd1	2227	165	0.6327	20.7319	619	0.7225	71.053	401	0.7292	48.9565	520	0.7189	57.4753	505	0.7337	63.3189	528	0.7337	59.9014	460	0.7324	51.415	567	0.7288	65.7133	483	0.705	56.5992	481	0.7261	57.3633	577	0.727	72.762	471	0.7176	60.6704
ENSRNOG00000049681	Mapre2	1502	165	0.9015	30.739	159	0.9674	27.0607	145	0.9314	26.2473	170	0.9913	27.8597	155	0.9414	28.8153	183	0.994	30.7826	181	0.988	29.9958	159	0.98	27.3223	179	0.9694	31.1004	166	0.9907	29.3526	162	0.9654	30.2897	157	0.9867	29.9851
ENSRNOG00000028629	Akt1	1606	165	0.9421	28.7484	247	0.9689	39.3155	247	0.9832	41.8156	301	0.9888	46.1338	188	0.9539	32.6869	266	0.9956	41.8465	232	0.9857	35.9579	257	0.9782	41.3026	302	0.99	49.0732	245	0.99	40.5163	242	0.9807	42.3174	248	0.9819	44.2978
ENSRNOG00000023386	Gorasp2	2063	165	0.8216	22.38	219	0.9336	27.1367	183	0.9215	24.1178	212	0.9583	25.295	205	0.9346	27.747	188	0.9603	23.0241	192	0.8701	23.1662	191	0.9161	23.896	208	0.935	26.3116	167	0.9016	21.4994	228	0.953	31.0374	192	0.8827	26.698
ENSRNOG00000016684	Wnk2	6450	165	0.5898	7.15813	167	0.6569	6.61864	108	0.5171	4.55251	240	0.7299	9.15903	222	0.7028	9.61071	153	0.615	5.99315	167	0.6212	6.44479	227	0.754	9.08357	153	0.6129	6.19034	185	0.6625	7.61765	203	0.6512	8.83864	162	0.6178	7.20496
ENSRNOG00000040005	Ndufa1	416	164	0.863	110.313	358	0.9567	219.989	398	0.9784	260.121	324	0.9447	191.712	258	0.9519	173.176	442	0.9615	268.443	250	0.8894	149.589	292	0.9471	181.167	379	0.9447	237.755	311	0.9615	198.553	316	0.9688	213.326	372	0.976	256.523
ENSRNOG00000019390	Klhl40	2266	164	0.8041	20.2516	357	0.9656	40.2736	245	0.9625	29.3963	395	0.981	42.9077	308	0.9722	37.9536	262	0.9665	29.2122	329	0.9598	36.14	396	0.9466	45.1051	320	0.962	36.853	291	0.9629	34.1069	383	0.9753	47.4666	276	0.9629	34.9402
ENSRNOG00000006785	Dcaf8	2918	164	0.7587	15.7266	263	0.9503	23.04	188	0.9198	17.517	333	0.9729	28.0903	263	0.9249	25.1671	235	0.9345	20.3473	312	0.9606	26.6147	285	0.9623	25.2087	271	0.9531	24.2363	274	0.9657	24.9387	293	0.9421	28.1989	215	0.9075	21.1363
ENSRNOG00000045831	Lmod2	2211	164	0.2311	20.7554	508	0.2908	58.7337	315	0.2691	38.7354	469	0.2678	52.2134	355	0.2696	44.8334	389	0.27	44.4513	460	0.2904	51.7871	408	0.2904	47.6279	323	0.2664	38.1239	476	0.2917	57.1778	451	0.2659	57.2845	367	0.2678	47.616
ENSRNOG00000001807	Sspn	3552	164	0.681	12.9195	271	0.9026	19.5033	157	0.8043	12.0175	264	0.9398	18.2949	205	0.795	16.1155	177	0.8516	12.5899	197	0.8806	13.8053	241	0.8561	17.5119	205	0.8958	15.0614	213	0.8598	15.9263	242	0.8826	19.1334	197	0.8708	15.91
ENSRNOG00000000068	Ppp2r5a	2596	164	0.8143	17.6772	264	0.9253	25.9963	207	0.8979	21.6796	262	0.9357	24.8425	208	0.9376	22.3728	247	0.9314	24.039	228	0.9037	21.8616	247	0.9099	24.5574	230	0.8998	23.121	260	0.9449	26.5998	259	0.923	28.0185	208	0.8737	22.9845
ENSRNOG00000015447	Calcoco1	2945	164	0.3039	15.5824	145	0.3076	12.5862	133	0.3042	12.2787	160	0.3022	13.3731	132	0.2896	12.5156	134	0.2927	11.4959	172	0.3046	14.5377	175	0.3042	15.3371	135	0.2859	11.9628	156	0.2944	14.0685	162	0.3053	15.4482	158	0.3008	15.3903
ENSRNOG00000036852	PCBP2	1555	164	0.7222	29.5113	301	0.8174	49.4821	247	0.8154	43.187	340	0.8264	53.8204	252	0.8219	45.2514	337	0.827	54.7549	297	0.8051	47.5421	309	0.7923	51.2883	320	0.8572	53.7035	283	0.8174	48.3354	274	0.8032	49.4845	287	0.8232	52.9453
ENSRNOG00000014562	Hnrnpf	2158	163	0.7544	21.1354	318	0.9059	37.6693	301	0.9254	37.9229	413	0.9055	47.1082	312	0.9184	40.3706	345	0.9226	40.3916	337	0.8994	38.8714	352	0.8846	42.0999	312	0.88	37.7299	369	0.8953	45.4134	331	0.9208	43.0751	323	0.9032	42.9365
ENSRNOG00000010370	Tnip1	2871	163	0.7168	15.8866	204	0.9317	18.1639	172	0.899	16.2885	223	0.9056	19.1192	169	0.8467	16.4367	184	0.9063	16.1923	43	0.551	3.7281	43	0.5677	3.86568	43	0.5336	3.90857	14	0.2107	1.2951	14	0.2208	1.36944	14	0.2302	1.39885
ENSRNOG00000014316	Rapgef1	3658	163	0.7362	12.4686	137	0.792	9.5739	108	0.6818	8.02725	192	0.8376	12.9198	124	0.7786	9.46542	135	0.8054	9.32424	188	0.877	12.7928	170	0.8065	11.9949	156	0.8223	11.1292	166	0.8045	12.0524	132	0.7395	10.134	122	0.7695	9.56736
ENSRNOG00000046763	Adssl1	1440	163	0.8868	31.6738	323	0.9424	57.3393	300	0.9493	56.6429	337	0.9437	57.6057	273	0.9382	52.9374	308	0.9375	54.0395	293	0.9431	50.6474	311	0.9382	55.7427	339	0.9479	61.4356	265	0.9403	48.8756	364	0.9424	70.9885	254	0.9479	50.5996
ENSRNOG00000005157	Rbbp7	1922	163	0.8543	23.7306	359	0.9329	47.7478	300	0.9719	42.4379	404	0.9521	51.74	335	0.9391	48.6691	322	0.9657	42.3278	318	0.9381	41.1838	380	0.9771	51.0294	308	0.9615	41.8196	26	0.4396	3.59277	26	0.4698	3.799	26	0.5062	3.88057
ENSRNOG00000013474	Casz1	5280	162	0.6466	8.58532	128	0.6636	6.1971	83	0.4718	4.27396	193	0.7932	8.99749	131	0.6466	6.92787	100	0.5672	4.78508	176	0.6854	8.29719	162	0.7623	7.91902	105	0.617	5.18965	148	0.6544	7.44452	158	0.6987	8.40374	104	0.5691	5.65035
ENSRNOG00000038366	Larp1b	3317	162	0.5601	13.6661	273	0.8215	21.0392	231	0.7712	18.9345	289	0.8342	21.4462	261	0.8426	21.9714	263	0.8248	20.0324	244	0.8441	18.3103	255	0.827	19.842	234	0.7914	18.41	250	0.7938	20.0172	247	0.8046	20.9122	214	0.7169	18.5074
ENSRNOG00000018176	Rab6a	3026	162	0.5628	14.9803	269	0.8999	22.7246	208	0.8519	18.6888	319	0.9587	25.949	260	0.88	23.992	250	0.8962	20.8735	283	0.9223	23.2793	262	0.9167	22.3472	254	0.9356	21.9052	254	0.9356	22.2933	348	0.9266	32.2968	218	0.8014	20.6663
ENSRNOG00000002318	Limch1	3918	162	0.7519	11.5698	182	0.879	11.8746	124	0.7399	8.60486	270	0.9357	16.9628	177	0.8121	12.6145	169	0.8111	10.898	215	0.8484	13.6592	206	0.9178	13.5704	190	0.8305	12.6553	223	0.9068	15.1164	231	0.8545	16.5576	174	0.8275	12.7397
ENSRNOG00000005310	Cul1	3005	162	0.7311	15.085	336	0.9544	28.5829	249	0.9048	22.529	358	0.9311	29.3249	280	0.9151	26.0181	267	0.9018	22.4486	335	0.9334	27.7493	330	0.9474	28.3439	269	0.9358	23.361	324	0.9464	28.6358	362	0.9604	33.8309	262	0.8889	25.0111
ENSRNOG00000018487	Slc3a2	1940	162	0.7835	23.3662	399	0.9624	52.5755	280	0.932	39.2412	285	0.9325	36.1611	313	0.8964	45.051	264	0.8918	34.3816	42	0.584	5.3889	42	0.5706	5.58776	42	0.5531	5.64977	19	0.3263	2.60112	19	0.3799	2.75043	19	0.3242	2.80949
ENSRNOG00000016344	Slc39a1	2410	162	0.734	18.8093	289	0.9751	30.6544	270	0.9444	30.4602	302	0.9353	30.8452	209	0.8925	24.2154	289	0.9506	30.2973	247	0.9402	25.5113	250	0.949	26.774	279	0.978	30.2114	238	0.9444	26.2282	278	0.9237	32.3949	259	0.9747	30.8289
ENSRNOG00000018993	Ilk	1686	162	0.8737	26.8864	183	0.9674	27.7463	188	0.9775	30.317	218	0.9834	31.8271	195	0.9739	32.2953	205	0.9181	30.7199	171	0.9543	25.2459	195	0.9603	29.8516	208	0.9781	32.195	189	0.9549	29.7724	186	0.9709	30.9817	170	0.9632	28.9246
ENSRNOG00000001256	Atxn2	3809	161	0.7054	11.8274	150	0.7561	10.0668	127	0.6545	9.06524	186	0.8401	12.0199	133	0.7543	9.74996	137	0.7477	9.08726	161	0.8031	10.5212	149	0.7729	10.0964	136	0.7128	9.31775	163	0.7934	11.3654	164	0.7908	12.0916	141	0.7606	10.619
ENSRNOG00000015753	Epn1	2031	161	0.8016	22.1815	205	0.9045	25.8022	191	0.9291	25.5688	243	0.9902	29.4506	166	0.9173	22.8223	232	0.9291	28.8603	196	0.9577	24.0214	186	0.9207	23.6371	268	0.9739	34.4356	149	0.936	19.4843	209	0.9665	28.8992	185	0.9828	26.1299
ENSRNOG00000046547	Rbm24	2239	161	0.8021	20.1209	254	0.9482	28.9996	174	0.9402	21.1291	331	0.9589	36.3892	251	0.9236	31.3027	244	0.9696	27.5334	270	0.9665	30.0166	271	0.9477	31.2396	214	0.9375	24.9427	282	0.9433	33.4506	236	0.9665	29.6011	231	0.9594	29.5961
ENSRNOG00000009884	Lgals1	532	161	0.9624	84.6817	256	0.9699	123.01	239	0.985	122.144	183	0.9605	84.6716	192	0.9662	100.775	249	0.968	118.253	190	0.968	88.8985	203	0.9662	98.486	238	0.9737	116.748	155	0.9737	77.3801	192	0.9718	101.354	207	0.968	111.618
ENSRNOG00000017952	2014-09-02	3191	161	0.7252	14.118	273	0.9376	21.87	228	0.938	19.4265	294	0.948	22.6787	293	0.947	25.6391	265	0.9301	20.9818	279	0.9298	21.7635	296	0.9571	23.9417	297	0.9373	24.2892	290	0.9589	24.1368	296	0.9314	26.0504	254	0.8884	22.834
ENSRNOG00000020915	Setd2	7963	161	0.4851	5.6575	190	0.6425	6.09943	125	0.4734	4.26795	229	0.6655	7.07876	193	0.6116	6.76772	154	0.5222	4.88616	203	0.6308	6.34558	204	0.6472	6.61217	177	0.6074	5.80069	229	0.6675	7.63779	225	0.6928	7.93515	146	0.5207	5.25959
ENSRNOG00000005256	Zc3h15	2011	161	0.8543	22.4021	375	0.9428	47.6685	277	0.9552	37.4502	320	0.9498	39.1684	303	0.9538	42.072	316	0.9523	39.7007	310	0.9423	38.3709	345	0.9632	44.2789	287	0.9647	37.2437	341	0.9597	45.0351	384	0.9567	53.6251	264	0.9543	37.6589
ENSRNOG00000050997	Ifrd1	1791	161	0.8626	25.1539	470	0.9838	67.0833	228	0.9157	34.6119	385	0.952	52.9131	351	0.9436	54.7235	280	0.9687	39.499	396	0.9414	55.0366	381	0.9458	54.906	261	0.9799	38.0301	366	0.9682	54.2743	466	0.976	73.0701	280	0.9475	44.8475
ENSRNOG00000020994	Slc25a39	1445	161	0.8228	31.1769	244	0.9294	43.1652	197	0.9426	37.0668	242	0.9433	41.2236	203	0.9509	39.2275	227	0.9488	39.69	208	0.9246	35.8301	201	0.9349	35.902	283	0.9529	51.1095	202	0.9253	37.1272	258	0.9329	50.1419	209	0.9024	41.491
ENSRNOG00000028498	Wdr1	2813	160	0.7732	15.9157	305	0.9563	27.7167	244	0.9243	23.5834	312	0.9541	27.3013	245	0.9157	24.3197	272	0.9719	24.43	274	0.9282	24.2456	296	0.9634	27.1589	321	0.9545	29.7796	290	0.9733	27.3802	283	0.9563	28.2531	282	0.9456	28.7578
ENSRNOG00000002886	Myh10	7630	160	0.5389	5.86774	297	0.813	9.95048	201	0.6875	7.16239	397	0.8567	12.8075	289	0.7764	10.5763	249	0.706	8.24514	332	0.8239	10.8309	348	0.8087	11.7719	227	0.7279	7.76398	329	0.7933	11.452	337	0.7868	12.4038	197	0.6484	7.40658
ENSRNOG00000006859	Insig1	2428	160	0.8052	18.4394	340	0.8867	35.7966	238	0.8418	26.6511	100	0.7138	10.1379	77	0.701	8.85532	74	0.6685	7.70028	386	0.881	39.5723	396	0.8785	42.0956	291	0.8942	31.2772	345	0.8913	37.738	357	0.8587	41.2923	274	0.8847	32.3726
ENSRNOG00000004827	Papola	4047	160	0.6938	11.0627	254	0.8483	16.044	187	0.8737	12.563	299	0.9182	18.186	219	0.8238	15.1103	194	0.7892	12.1113	214	0.895	13.1623	219	0.8389	13.9669	236	0.8604	15.2181	245	0.915	16.0784	227	0.9209	15.7522	164	0.8149	11.6248
ENSRNOG00000011057	Mfn1	2316	160	0.7966	19.3311	264	0.9115	29.1392	205	0.8856	24.0659	353	0.9193	37.5175	254	0.8795	30.6237	255	0.8981	27.8179	289	0.9266	31.0607	269	0.9106	29.9781	245	0.921	27.6064	299	0.9119	34.288	297	0.9106	36.0137	210	0.9223	26.011
ENSRNOG00000019069	Nxf1	2237	160	0.7729	20.0138	227	0.9481	25.9401	166	0.9258	20.1757	245	0.92	26.9587	205	0.9379	25.5888	192	0.9253	21.685	210	0.9397	23.3671	212	0.975	24.4602	174	0.8851	20.2986	194	0.9289	23.0327	209	0.9195	26.2379	171	0.9687	21.9284
ENSRNOG00000013300	Atpif1	482	160	0.9502	92.8856	502	0.9979	266.237	572	0.9979	322.653	436	0.9917	222.658	403	0.9896	233.464	637	0.9979	333.9	399	0.9979	206.053	423	0.9979	226.508	580	0.9979	314.025	417	0.9772	229.772	472	0.9979	275.007	506	0.9938	301.148
ENSRNOG00000024603	Rps15	491	160	0.7699	91.183	348	0.7963	181.18	554	0.8065	306.771	310	0.7902	155.41	240	0.7943	136.487	621	0.8045	319.546	302	0.8045	153.101	265	0.7943	139.301	537	0.7984	285.414	260	0.7963	140.637	370	0.8004	211.626	445	0.7943	259.989
ENSRNOG00000020897	Prpf19	2114	160	0.921	21.1783	292	0.9565	35.3094	229	0.9026	29.4521	292	0.9664	33.9998	233	0.9645	30.7761	225	0.9721	26.8906	272	0.9319	32.027	230	0.9541	28.081	223	0.9579	27.5285	25	0.4224	3.14083	25	0.4016	3.32112	25	0.4224	3.39243
ENSRNOG00000001548	Nfe2l2	2328	159	0.7818	19.1113	364	0.9931	39.9697	272	0.9532	31.7667	371	0.9618	39.2274	349	0.9781	41.8605	341	0.9463	37.0079	346	0.948	36.9952	374	0.9841	41.4647	301	0.9407	33.7417	323	0.9759	36.8492	347	0.9437	41.8597	278	0.9493	34.2561
ENSRNOG00000008016	Ckap4	2548	159	0.7229	17.4612	186	0.8658	18.6606	151	0.8403	16.1125	231	0.9549	22.3157	164	0.9105	17.9724	164	0.8807	16.2618	185	0.8732	18.0728	199	0.9093	20.1578	156	0.8685	15.9775	177	0.9011	18.4494	194	0.8532	21.3822	177	0.8603	19.9274
ENSRNOG00000016251	Dnaja2	1838	159	0.8787	24.2062	400	0.9913	55.6323	364	0.9793	53.8446	59	0.7552	7.90141	59	0.7345	8.96331	59	0.7089	8.11017	415	0.9804	56.2024	427	0.9908	59.9615	366	0.9837	51.9659	389	0.9804	56.2099	414	0.9859	63.2563	352	0.9744	54.938
ENSRNOG00000015229	Zc3h4	3915	159	0.7527	11.3642	114	0.6973	7.44364	76	0.5814	5.27799	178	0.7918	11.1915	107	0.7226	7.63157	108	0.6904	6.96972	133	0.716	8.45614	127	0.7367	8.37264	121	0.6971	8.0656	110	0.6554	7.46225	135	0.7803	9.68392	104	0.6097	7.6204
ENSRNOG00000030302	Csde1	3729	159	0.2953	11.9311	586	0.3939	40.1714	609	0.3931	44.4029	566	0.3915	37.3613	516	0.3969	38.6384	703	0.3955	47.6306	497	0.3905	33.1754	536	0.395	37.099	520	0.3947	36.391	568	0.3947	40.4543	645	0.3958	48.5754	548	0.3955	42.1565
ENSRNOG00000004449	E2f6	2171	159	0.8374	20.4933	264	0.9572	31.0854	192	0.9558	24.0452	294	0.9834	33.3339	222	0.9268	28.5532	231	0.977	26.8829	231	0.9387	26.4853	257	0.9788	30.5537	207	0.9093	24.8825	227	0.9797	27.7699	251	0.9885	32.4686	211	0.9401	27.8804
ENSRNOG00000021156	Vegfb	1786	159	0.4877	24.911	229	0.6265	32.7768	190	0.6355	28.924	236	0.6814	32.5259	207	0.5795	32.3632	237	0.5465	33.5267	220	0.6254	30.6615	224	0.6209	32.3711	231	0.6058	33.7531	199	0.5308	29.5924	208	0.682	32.7063	192	0.5963	30.8387
ENSRNOG00000003359	Ogt	5290	158	0.5756	8.3575	220	0.849	10.6311	187	0.738	9.61109	281	0.8873	13.0752	184	0.7454	9.71235	181	0.7497	8.64463	220	0.8095	10.3519	241	0.8382	11.7585	183	0.7824	9.02773	256	0.8423	12.8527	248	0.8291	13.1657	195	0.7268	10.5744
ENSRNOG00000019349	Sf3a2	1607	158	0.9546	27.5116	120	0.9546	19.0888	106	0.9079	17.934	164	0.9639	25.1204	151	0.9764	26.2375	121	0.934	19.0236	158	0.9371	24.4734	145	0.9365	23.2885	142	0.9546	23.0598	132	0.9652	21.8156	140	0.9764	24.4659	119	0.9166	21.2426
ENSRNOG00000013381	Tsg101	1436	158	0.6985	30.7877	199	0.906	35.4251	147	0.8238	27.8323	190	0.8858	32.5685	146	0.8879	28.3897	173	0.9032	30.4379	162	0.8914	28.081	170	0.906	30.5552	158	0.9067	28.7135	149	0.9297	27.5576	186	0.9659	36.3754	126	0.8656	25.1705
ENSRNOG00000016214	Agl	7567	158	0.5191	5.84263	374	0.7724	12.6346	239	0.6495	8.58738	191	0.6354	6.21309	165	0.5495	6.08867	152	0.5122	5.07508	383	0.7403	12.5987	414	0.7732	14.121	326	0.7461	11.2429	370	0.7144	12.9863	416	0.7805	15.439	293	0.7184	11.1076
ENSRNOG00000022781	Ccser2	3216	158	0.4869	13.7473	168	0.7037	13.3538	108	0.6026	9.13049	191	0.7578	14.6189	156	0.7326	13.5447	128	0.7006	10.0558	166	0.6017	12.8483	161	0.7201	12.9211	126	0.644	10.2244	142	0.6975	11.7268	157	0.6937	13.7099	129	0.7058	11.5067
ENSRNOG00000027690	Eif3e	1476	158	0.8814	29.9534	372	0.9885	64.4271	337	0.9946	62.0769	354	0.9871	59.0358	287	0.9871	54.2947	422	0.9905	72.2353	303	0.9776	51.0985	381	0.9831	66.6237	350	0.9878	61.882	306	0.935	55.061	320	0.9946	60.8854	350	0.9885	68.0233
ENSRNOG00000012874	Rgma	3485	158	0.6238	12.6861	119	0.738	8.72884	90	0.6448	7.02144	153	0.7303	10.8065	115	0.6872	9.21419	99	0.7159	7.17721	121	0.6442	8.64241	148	0.8003	10.961	105	0.6683	7.86266	150	0.8201	11.4313	129	0.7418	10.3953	103	0.6241	8.47833
ENSRNOG00000018107	Zfand5	2147	157	0.7699	20.4618	509	0.9851	60.6035	411	0.9539	52.0471	534	0.9986	61.222	438	0.9958	56.9645	421	0.9781	49.542	479	0.9907	55.5336	450	0.9828	54.0967	373	0.9725	45.3377	496	0.9949	61.3562	540	0.9995	70.6335	371	0.9837	49.5699
ENSRNOG00000038166	Ptgr2	3006	157	0.8317	14.6146	344	0.9637	29.2538	204	0.9112	18.4513	272	0.9182	22.273	239	0.9358	22.2009	219	0.9225	18.4068	281	0.9491	23.2686	303	0.9651	26.0162	289	0.9534	25.0895	21	0.3084	1.85541	29	0.3317	2.70931	29	0.3436	2.76748
ENSRNOG00000007459	Pcnx	7969	157	0.5188	5.51278	206	0.6431	6.60808	132	0.5001	4.50357	307	0.7485	9.48272	198	0.635	6.93783	186	0.6046	5.89702	256	0.742	7.99629	230	0.6575	7.44928	216	0.6569	7.07348	235	0.6611	7.83201	233	0.6144	8.2111	175	0.5936	6.29956
ENSRNOG00000012204	AU040320	4269	157	0.5784	10.2908	179	0.8011	10.7186	131	0.6332	8.34318	205	0.8496	11.8202	163	0.7899	10.6616	160	0.7679	9.46929	175	0.7868	10.2039	170	0.7676	10.2781	145	0.7491	8.8639	161	0.7215	10.0163	214	0.7829	14.0779	143	0.7145	9.60917
ENSRNOG00000009928	Bckdhb	1494	157	0.8614	29.4052	369	0.9772	63.1376	317	0.9766	57.6893	378	0.9712	62.2787	250	0.9618	46.7252	365	0.9732	61.7257	346	0.9846	57.6471	341	0.9766	58.9107	357	0.9766	62.3592	381	0.9692	67.7304	356	0.9766	66.9189	343	0.9866	65.8597
ENSRNOG00000001682	Ttc3	6171	157	0.5568	7.11901	227	0.6602	9.40335	129	0.5798	5.68356	234	0.7294	9.3338	207	0.6838	9.36649	165	0.6202	6.75541	224	0.685	9.03534	239	0.7172	9.99615	175	0.615	7.40058	210	0.6853	9.03801	234	0.7363	10.649	168	0.6433	7.80962
ENSRNOG00000016610	Arhgap1	2877	157	0.7428	15.2699	170	0.8644	15.105	121	0.8425	11.4349	218	0.9079	18.6515	187	0.8961	18.1495	144	0.8672	12.6458	198	0.9183	17.1308	187	0.9114	16.7761	174	0.9131	15.7831	167	0.8818	15.4165	160	0.8912	15.6181	149	0.8672	14.8567
ENSRNOG00000037765	Lims1	3964	156	0.5575	11.012	385	0.9162	24.8279	245	0.8542	16.8042	394	0.9137	24.4659	335	0.9016	23.5979	343	0.9347	21.8617	402	0.9016	25.2432	412	0.9258	26.8259	304	0.866	20.0135	311	0.8731	20.837	353	0.8898	25.0087	285	0.9029	20.6247
ENSRNOG00000016511	Pitrm1	3178	156	0.7788	13.7355	230	0.9223	18.5006	171	0.8335	14.6295	289	0.9651	22.3842	192	0.9003	16.8698	220	0.9449	17.4901	34	0.3622	2.66304	34	0.3924	2.76131	34	0.3962	2.79195	17	0.2077	1.42071	17	0.2137	1.50226	17	0.2017	1.53451
ENSRNOG00000006965	Aff4	10168	156	0.3765	4.29303	306	0.6837	7.69304	202	0.5299	5.40135	407	0.7193	9.85274	317	0.6604	8.70534	255	0.5861	6.33619	288	0.6411	7.05033	355	0.7011	9.01121	264	0.6264	6.77566	312	0.6871	8.14944	312	0.6794	8.61724	217	0.5887	6.1221
ENSRNOG00000037245	Gdi1	2296	156	0.797	19.012	198	0.9098	22.0448	156	0.9247	18.4731	185	0.9451	19.8334	179	0.9673	21.7692	169	0.9464	18.5968	202	0.9538	21.8994	226	0.9281	25.4054	198	0.9564	22.5049	183	0.939	21.1684	234	0.9808	28.6216	192	0.9743	23.9886
ENSRNOG00000009683	Sdcbp	2029	156	0.7639	21.5138	571	0.9724	71.9393	481	0.969	64.4539	524	0.9911	63.5693	463	0.9768	63.7178	605	0.9828	75.335	462	0.9842	56.6777	488	0.9887	62.0766	545	0.9931	70.0967	466	0.9763	60.9976	547	0.9763	75.7102	532	0.9813	75.2152
ENSRNOG00000003217	Lgals3bp	2152	156	0.7458	20.2842	146	0.9029	17.3429	114	0.8615	14.4029	135	0.8862	15.4415	134	0.8852	17.387	100	0.7709	11.7404	120	0.8239	13.8801	128	0.8741	15.3518	113	0.868	13.7031	116	0.8253	14.3161	134	0.8862	17.4869	105	0.8355	13.9966
ENSRNOG00000018494	Ppp1r3c	2747	155	0.5999	15.7888	352	0.6822	32.7564	257	0.6746	25.4367	387	0.676	34.6777	320	0.6775	32.5277	319	0.6797	29.3397	279	0.6585	25.2812	381	0.6731	35.7978	331	0.6727	31.4451	354	0.6804	34.2258	351	0.6731	35.8837	284	0.6604	29.6576
ENSRNOG00000017106	Csnk1a1	2171	155	0.8121	19.9778	417	0.9576	49.1008	318	0.9655	39.8248	443	0.9936	50.2276	427	0.9816	54.92	398	0.9922	46.3177	405	0.988	46.4352	463	0.9959	55.0442	353	0.9719	42.4324	420	0.9756	51.3805	470	0.9807	60.7977	375	0.9751	49.5504
ENSRNOG00000001442	Por	2438	155	0.8593	17.7899	179	0.9463	18.7686	176	0.9299	19.6275	260	0.9586	26.2505	192	0.9569	21.9902	215	0.9737	22.2807	38	0.4754	3.87974	38	0.5271	4.02291	38	0.4852	4.06755	14	0.2498	1.52512	14	0.2568	1.61266	14	0.2584	1.64729
ENSRNOG00000016866	Fhl2	840	155	0.9321	51.633	380	0.9976	115.642	287	0.9952	92.8943	323	0.9952	94.6502	286	0.9976	95.0712	348	0.994	104.67	58	0.881	17.187	58	0.9762	17.8213	58	0.9048	18.019	26	0.7833	8.22059	26	0.8143	8.69247	26	0.7667	8.87912
ENSRNOG00000009994	Dlat	2600	155	0.4538	16.6814	189	0.5958	18.5823	136	0.5585	14.2217	219	0.5646	20.7333	162	0.5769	17.3982	167	0.5638	16.2281	208	0.5608	19.9133	184	0.5873	18.2656	219	0.5877	21.9813	172	0.5615	17.5697	194	0.5912	20.9545	164	0.5719	18.0945
ENSRNOG00000001582	Bach1	3232	155	0.7172	13.4195	136	0.8128	10.7567	117	0.7296	9.8424	249	0.9066	18.9638	155	0.9177	13.3913	166	0.9028	12.9766	174	0.8428	13.4008	149	0.8778	11.8989	152	0.8787	12.2731	182	0.8994	14.9558	161	0.8948	13.9896	131	0.7936	11.6272
ENSRNOG00000013545	Polr2e	1082	155	0.8965	40.0848	242	0.9806	57.1742	216	0.9769	54.2766	226	0.9566	51.4138	194	0.9279	50.0653	249	0.9603	58.1427	217	0.9445	49.9212	209	0.939	49.8551	222	0.9603	53.5437	188	0.9455	46.1466	257	0.9427	66.7045	190	0.9279	50.3735
ENSRNOG00000007390	Nfkbia	1565	155	0.8492	27.7136	235	0.9201	38.3854	202	0.9565	35.0932	229	0.9565	36.018	180	0.9105	32.1159	222	0.9067	35.8395	37	0.6952	5.88491	37	0.6109	6.10208	37	0.6601	6.16979	18	0.3942	3.05469	18	0.4658	3.23004	18	0.3885	3.29939
ENSRNOG00000005686	Suclg2	2219	155	0.8792	19.5456	463	0.9941	53.3379	384	0.9775	47.0501	509	0.9914	56.4623	415	0.9923	52.2219	428	0.9896	48.7315	107	0.8202	12.0027	107	0.895	12.4456	107	0.8562	12.5837	401	0.977	47.995	476	0.9919	60.2419	415	0.9937	53.6496
ENSRNOG00000042068	Otud7b	5958	155	0.5391	7.27958	194	0.6888	8.32364	155	0.667	7.07323	315	0.8412	13.0139	222	0.7462	10.4043	213	0.786	9.03239	247	0.7521	10.3193	257	0.8149	11.1333	191	0.7351	8.36596	243	0.8312	10.8322	268	0.8256	12.6323	187	0.6826	9.00362
ENSRNOG00000012772	Nqo1	1455	155	0.9443	29.8088	342	0.9973	60.0863	339	0.9986	63.3466	321	0.9945	54.3051	295	0.9938	56.6136	351	0.9952	60.9491	48	0.7911	8.21165	48	0.7443	8.51468	48	0.767	8.60917	250	0.9973	45.6337	356	0.9938	68.7126	355	0.9959	69.9909
ENSRNOG00000002205	Ociad1	1347	154	0.8582	31.991	328	0.974	62.247	324	0.9599	65.3979	309	0.9703	56.4663	331	0.9673	68.6155	290	0.9688	54.3944	288	0.9688	53.2203	331	0.9866	63.4236	313	0.9777	60.6401	299	0.9569	58.9539	345	0.9807	71.9285	307	0.9889	65.3803
ENSRNOG00000022196	Bmpr2	3869	154	0.6276	11.1377	156	0.787	10.3071	115	0.7139	8.08138	234	0.8873	14.8873	155	0.7824	11.1865	162	0.8426	10.5789	163	0.7992	10.4868	191	0.7976	12.7416	169	0.8111	11.3991	209	0.8736	14.3468	169	0.7999	12.267	139	0.7943	10.306
ENSRNOG00000006868	Ube2z	2856	154	0.7486	15.0882	198	0.9118	17.7223	147	0.8323	13.9941	244	0.9237	21.0295	194	0.9069	18.9673	206	0.8876	18.2235	189	0.8704	16.4724	223	0.8803	20.1529	224	0.9279	20.4679	193	0.9048	17.9477	214	0.9163	21.0429	174	0.8876	17.477
ENSRNOG00000025580	Ube2v1	1750	154	0.7211	24.624	174	0.7566	25.4169	175	0.76	27.1886	238	0.7663	33.4763	147	0.7749	23.4553	224	0.7829	32.3395	197	0.7783	28.0208	196	0.7783	28.9074	172	0.7566	25.6492	179	0.7617	27.1659	212	0.772	34.021	179	0.7697	29.3421
ENSRNOG00000028384	Npepl1	1882	154	0.822	22.8969	199	0.9495	27.03	180	0.9841	26.004	221	0.9926	28.9049	158	0.9777	23.4423	194	0.974	26.0439	30	0.5361	3.96784	30	0.4899	4.11426	30	0.5425	4.15992	12	0.2837	1.69344	12	0.2864	1.79065	12	0.2922	1.8291
ENSRNOG00000001239	Ddt	628	154	0.965	68.6177	197	0.9889	80.1897	200	0.9968	86.5878	199	0.9889	77.9995	163	0.9697	72.4753	181	0.9761	72.8186	180	0.9984	71.3453	194	0.9952	79.7319	207	0.9825	86.0189	14	0.6274	5.92076	14	0.6083	6.26062	14	0.5685	6.39506
ENSRNOG00000017297	Cab39	3684	154	0.6387	11.697	238	0.8936	16.5147	194	0.8453	14.3175	241	0.8912	16.1026	204	0.8165	15.4622	191	0.8309	13.099	224	0.8912	15.1349	212	0.8746	14.8527	199	0.9053	14.0967	19	0.2142	1.36976	19	0.2286	1.44838	19	0.2041	1.47948
ENSRNOG00000045765	MGC94207	1742	154	0.8749	24.737	232	0.9989	34.0449	173	0.9644	27.0013	214	0.9891	30.2387	172	0.961	27.5704	205	0.9868	29.7323	200	0.9788	28.5781	180	0.9501	26.6695	199	0.9799	29.8118	177	0.9575	26.9857	211	0.9851	34.016	184	0.9673	30.3002
ENSRNOG00000001409	Gnb2	1624	154	0.9095	26.5344	238	0.9834	37.463	203	0.9704	33.9857	235	0.9852	35.6189	190	0.9631	32.6685	248	0.9809	38.5824	216	0.9692	33.107	221	0.9667	35.1234	239	0.9667	38.4056	192	0.9587	31.3996	216	0.9711	37.3523	222	0.9618	39.2142
ENSRNOG00000009643	Msl1	2724	154	0.5918	15.8194	162	0.8212	15.2027	129	0.7261	12.8756	201	0.8289	18.163	115	0.6608	11.7883	166	0.8018	15.3966	169	0.7294	15.443	161	0.7636	15.2549	151	0.7401	14.4661	150	0.8161	14.6249	166	0.8135	17.1139	119	0.6582	12.5319
ENSRNOG00000010543	Srpr	2295	154	0.8985	18.7764	256	0.9599	28.5147	203	0.9778	24.0492	308	0.9599	33.0344	232	0.9721	28.2272	242	0.9752	26.6413	258	0.9765	27.9827	272	0.9786	30.5898	240	0.9834	27.2905	253	0.9743	29.2784	283	0.9969	34.63	240	0.9708	29.9988
ENSRNOG00000010153	Raf1	2448	154	0.8766	17.6029	236	0.96	24.6441	177	0.8909	19.6584	274	0.9612	27.551	216	0.9534	24.6379	200	0.9612	20.6415	238	0.9179	24.2001	208	0.9281	21.9302	244	0.9338	26.0113	245	0.9449	26.5805	236	0.9277	27.0738	201	0.8983	23.5538
ENSRNOG00000021567	Ppp1r3a	7529	153	0.467	5.68629	314	0.7682	10.6612	180	0.5867	6.50013	71	0.2949	2.32124	71	0.3415	2.6332	71	0.34	2.38256	361	0.7874	11.935	353	0.7802	12.1012	202	0.6265	7.0016	390	0.8397	13.7574	260	0.7353	9.69807	198	0.6495	7.54404
ENSRNOG00000014415	Hsbp1	1201	153	0.9259	35.6471	312	0.965	66.4085	290	0.9725	65.651	299	0.9742	61.2811	251	0.9684	58.357	348	0.9933	73.2082	272	0.9617	56.3739	275	0.9734	59.099	311	0.9642	67.5772	256	0.9725	56.6117	324	0.9759	75.762	253	0.9667	60.4301
ENSRNOG00000015630	Cct7	2486	153	0.714	17.2213	449	0.7687	46.1697	341	0.7735	37.2941	420	0.8009	41.5859	356	0.7904	39.9863	387	0.7691	39.3308	345	0.7751	34.5438	407	0.7743	42.2555	431	0.749	45.2438	343	0.7751	36.6439	413	0.755	46.655	376	0.7675	43.3873
ENSRNOG00000005668	Ndufa8	611	152	0.7676	69.611	242	0.761	101.248	244	0.743	108.576	233	0.766	93.867	194	0.7594	88.659	283	0.7643	117.022	213	0.766	86.7742	217	0.7578	91.6661	304	0.7692	129.842	210	0.761	91.2824	275	0.7643	126.398	235	0.761	110.332
ENSRNOG00000009042	Sec24c	4457	152	0.6735	9.54281	195	0.8434	11.1842	163	0.7563	9.94332	253	0.8212	13.9726	182	0.8136	11.4023	224	0.8685	12.6978	249	0.862	13.9062	243	0.8553	14.0719	209	0.8429	12.2373	234	0.8802	13.9438	243	0.9152	15.3113	182	0.8391	11.714
ENSRNOG00000017604	Fam65a	3999	152	0.6752	10.6357	138	0.7824	8.82145	149	0.7784	10.1303	218	0.8255	13.4185	164	0.7787	11.4513	173	0.839	10.9299	160	0.7797	9.95912	166	0.8337	10.7139	173	0.8265	11.2896	186	0.8577	12.3529	151	0.7852	10.6041	151	0.7314	10.8318
ENSRNOG00000020615	Nap1l4	2265	152	0.8035	18.7781	352	0.9289	39.7271	273	0.9461	32.7703	411	0.9483	44.6655	320	0.955	39.4497	308	0.9241	34.3563	351	0.9298	38.5737	336	0.9351	38.2879	352	0.9404	40.5562	331	0.9479	38.8122	338	0.9607	41.9081	296	0.9859	37.4886
ENSRNOG00000043503	Ehd1	3232	152	0.7679	13.1597	179	0.8379	14.1577	178	0.8741	14.9739	213	0.901	16.2221	170	0.8679	14.6872	182	0.8979	14.2273	179	0.8502	13.7859	166	0.8769	13.2564	196	0.9347	15.8259	165	0.8215	13.5588	190	0.8707	16.5094	178	0.8564	15.7988
ENSRNOG00000001479	Gtf2i	4299	152	0.6611	9.89353	233	0.8672	13.8548	169	0.7874	10.6882	267	0.8814	15.2877	206	0.8004	13.3802	206	0.843	12.1066	211	0.8441	12.2171	225	0.8669	13.5084	236	0.8793	14.3261	209	0.8232	12.9118	231	0.8118	15.0902	184	0.7969	12.278
ENSRNOG00000006911	Sptb	6791	151	0.598	6.22183	167	0.6669	6.2863	110	0.5235	4.40398	33	0.2095	1.19613	33	0.224	1.35688	33	0.1957	1.22773	167	0.636	6.12118	178	0.6962	6.76514	184	0.6629	7.07078	193	0.7176	7.54801	219	0.7539	9.05648	112	0.5032	4.73108
ENSRNOG00000009615	Mtor	8556	151	0.4432	4.93834	182	0.5494	5.43767	122	0.4154	3.87682	237	0.6337	6.81829	194	0.6097	6.3313	136	0.4668	4.01598	176	0.5282	5.12028	206	0.5985	6.21422	170	0.5423	5.18515	205	0.5741	6.36344	210	0.5872	6.89283	154	0.5082	5.16328
ENSRNOG00000031965	Impdh2	1646	151	0.8779	25.6698	349	0.9684	54.2011	273	0.9721	45.0941	361	0.9708	53.9853	232	0.9617	39.3568	363	0.9666	55.7186	300	0.969	45.3674	313	0.9745	49.08	292	0.9678	46.2952	300	0.9696	48.4061	286	0.9702	48.7961	266	0.952	46.3583
ENSRNOG00000004420	Rad21	3556	151	0.7078	11.882	344	0.9334	24.7291	241	0.908	18.4265	323	0.8974	22.3583	289	0.9289	22.6933	294	0.9308	20.8886	305	0.9246	21.3496	322	0.9466	23.3714	294	0.8881	21.5759	289	0.9117	21.5847	323	0.9558	25.5088	254	0.9466	20.4903
ENSRNOG00000019638	Lmna	3073	151	0.7511	13.7496	402	0.8858	33.4407	320	0.932	28.3122	366	0.9092	29.3168	313	0.9313	28.4409	340	0.9157	27.9537	343	0.9154	27.7833	335	0.889	28.1367	328	0.8985	27.8544	304	0.8288	26.2736	398	0.837	36.3722	328	0.9183	30.6187
ENSRNOG00000009080	Atp6v1d	1316	151	0.9157	32.1067	332	0.9559	64.4903	312	0.9612	64.4592	296	0.9673	55.3648	273	0.9734	57.9254	349	0.9772	67.0028	266	0.9681	50.3127	274	0.9681	53.7384	333	0.9772	66.0346	240	0.9658	48.4356	287	0.9521	61.2457	281	0.9666	61.2529
ENSRNOG00000015221	EIF3F	1348	151	0.7574	31.3446	268	0.7908	50.8226	243	0.7804	49.0121	254	0.8056	46.3812	204	0.7871	42.2574	289	0.7626	54.1666	223	0.7975	41.1782	269	0.7953	51.5054	354	0.8027	68.5325	209	0.7967	41.178	245	0.8034	51.0417	285	0.8079	60.65
ENSRNOG00000006870	Mtdh	2231	151	0.8382	18.9388	224	0.9704	25.6661	197	0.8839	24.0078	234	0.9686	25.8175	183	0.8933	22.9041	174	0.8817	19.7048	223	0.9072	24.8804	219	0.8821	25.3358	163	0.8817	19.0665	230	0.8884	27.3802	271	0.9292	34.1129	189	0.8983	24.3018
ENSRNOG00000008348	Cdc34	1054	151	0.8861	40.0877	209	0.9602	50.6895	248	0.9725	63.9731	52	0.7287	12.144	52	0.7998	13.7761	52	0.796	12.4648	195	0.9099	46.0518	163	0.8985	39.9151	256	0.9839	63.3844	198	0.8975	49.8923	227	0.9905	60.4832	219	0.982	59.6046
ENSRNOG00000006989	Vamp2	2168	151	0.7357	19.4891	144	0.8072	16.9791	110	0.7191	13.7949	156	0.7601	17.7118	124	0.6725	15.9707	131	0.7989	15.2664	147	0.827	16.8776	118	0.7279	14.048	148	0.8441	17.815	124	0.75	15.1905	129	0.8316	16.7101	116	0.8201	15.3488
ENSRNOG00000021681	Eea1	7655	151	0.4594	5.51959	288	0.7667	9.61744	206	0.6726	7.31659	341	0.8089	10.965	319	0.7724	11.6361	247	0.7565	8.15221	284	0.7697	9.23475	315	0.7792	10.6208	202	0.6354	6.88635	313	0.7545	10.8595	317	0.8123	11.6296	227	0.6995	8.50661
ENSRNOG00000020710	Raver1	3445	151	0.6653	12.2649	165	0.865	12.2435	124	0.7576	9.78631	221	0.8958	15.7907	167	0.8624	13.536	147	0.8224	10.7808	183	0.8787	13.2225	172	0.8319	12.8863	151	0.8154	11.4385	152	0.807	11.7183	159	0.8096	12.9616	135	0.7951	11.2414
ENSRNOG00000013183	Eif4e	2369	150	0.4698	17.7175	217	0.7298	23.4157	192	0.6965	22.0355	232	0.756	24.1058	218	0.7493	25.6953	222	0.7611	23.6762	199	0.683	20.9093	228	0.7805	24.8405	169	0.7079	18.6168	227	0.7737	25.4489	218	0.7746	25.8429	167	0.6864	20.2222
ENSRNOG00000011825	Ndufb3	711	150	0.7257	59.0333	566	0.9381	203.497	494	0.8692	188.905	428	0.7384	148.174	439	0.8805	172.408	570	0.8073	202.548	409	0.9001	143.188	453	0.8706	164.444	563	0.8622	206.644	389	0.7918	145.308	510	0.8453	201.442	510	0.8214	205.767
ENSRNOG00000017133	P33MONOX	1961	150	0.7547	21.4037	217	0.9271	28.2875	154	0.8995	21.3516	238	0.9261	29.8743	173	0.9102	24.6338	224	0.9138	28.8598	165	0.9199	20.9439	218	0.9016	28.6926	227	0.9133	30.2086	190	0.8939	25.7327	203	0.8904	29.0715	163	0.9169	23.8444
ENSRNOG00000022298	Cxcl11	1126	150	0.7931	37.2759	214	0.952	48.5834	258	0.9813	62.2971	293	0.9183	64.0512	203	0.9529	50.3408	300	0.9787	67.3141	225	0.9654	49.7389	219	0.9449	50.1991	262	0.9858	60.722	286	0.9893	67.4585	225	0.9787	56.1169	216	0.9654	55.029
ENSRNOG00000018345	Abce1	3450	150	0.787	12.166	321	0.9467	23.7847	220	0.8983	17.3376	369	0.9501	26.3272	286	0.9252	23.1478	288	0.9412	21.091	335	0.9664	24.1701	308	0.9136	23.0421	278	0.9386	21.0285	46	0.4177	3.54118	39	0.3933	3.17464	38	0.4041	3.15966
ENSRNOG00000050437	Bod1l	8859	150	0.4587	4.73786	217	0.6433	6.26163	129	0.4493	3.95905	253	0.6584	7.02965	206	0.6217	6.49299	166	0.5835	4.7342	228	0.659	6.40623	232	0.6439	6.75917	149	0.5058	4.38919	274	0.6793	8.21438	264	0.6357	8.3689	160	0.5494	5.18097
ENSRNOG00000019661	Gdf15	912	150	0.9539	46.0227	389	0.9956	109.035	289	0.9715	86.1568	318	0.9978	85.8283	308	0.9715	94.3014	319	0.9912	88.3729	351	0.9638	95.7998	268	0.9879	75.8456	302	0.9912	86.4162	275	0.9759	80.0842	415	0.989	127.792	292	0.9923	91.8468
ENSRNOG00000011977	Sema5a	10501	149	0.3941	3.97037	212	0.583	5.1608	157	0.4594	4.06495	244	0.5923	5.71949	240	0.6034	6.38179	167	0.506	4.01799	230	0.5872	5.45192	250	0.5798	6.14469	211	0.5619	5.24366	239	0.5905	6.04472	209	0.5714	5.5894	184	0.4994	5.02647
ENSRNOG00000005263	Scaf11	4251	149	0.7172	9.80777	182	0.7718	10.9444	136	0.7212	8.6983	268	0.9047	15.5182	183	0.7953	12.0205	158	0.7577	9.39052	242	0.8499	14.1702	231	0.8262	14.0253	185	0.8252	11.357	235	0.8511	14.682	193	0.8523	12.7502	137	0.7267	9.24497
ENSRNOG00000018561	Pprc1	5228	149	0.6157	7.97491	126	0.6107	6.16094	125	0.5777	6.50071	190	0.7376	8.94574	138	0.6383	7.37065	152	0.6653	7.34567	138	0.6081	6.57046	138	0.6287	6.81293	149	0.6869	7.43761	171	0.662	8.68699	143	0.7094	7.68156	110	0.5308	6.03578
ENSRNOG00000012738	Eif3m	1259	149	0.8856	33.1158	306	0.9714	62.1309	332	0.9762	71.6966	290	0.9809	56.6984	234	0.9865	51.8982	368	0.9952	73.8492	263	0.9722	51.9975	290	0.9754	59.4515	366	0.9929	75.8645	248	0.9357	52.316	293	0.9833	65.3569	298	0.977	67.8995
ENSRNOG00000016543	Trim63	1842	149	0.8914	22.6346	288	0.9794	39.9682	199	0.9582	29.3731	314	0.9783	41.9603	201	0.9739	30.4697	211	0.9457	28.9412	274	0.9734	37.0265	251	0.9875	35.1702	207	0.9587	29.3267	267	0.9707	38.4973	279	0.9815	42.5367	161	0.9441	25.0733
ENSRNOG00000014051	Pgrmc2	1827	149	0.7805	22.8204	163	0.9168	22.8066	161	0.9338	23.9593	218	0.9228	29.3708	168	0.8768	25.6763	179	0.9075	24.7536	206	0.9321	28.066	198	0.9201	27.9716	185	0.954	26.4251	196	0.9206	28.4922	192	0.9031	29.5129	179	0.8987	28.1054
ENSRNOG00000022741	Ilf3	2976	149	0.7295	14.0097	141	0.8367	12.1115	84	0.6667	7.6742	205	0.9143	16.9558	151	0.8317	14.1679	131	0.8031	11.1215	151	0.8108	12.6298	171	0.8498	14.8304	159	0.8636	13.9427	141	0.8538	12.5833	162	0.8861	15.2873	123	0.8001	11.8563
ENSRNOG00000008019	Oxr1	4220	149	0.6543	9.87982	358	0.895	21.6862	262	0.7564	16.8801	413	0.9367	24.0899	303	0.8327	20.049	267	0.8168	15.9854	318	0.8969	18.7572	335	0.9239	20.4891	295	0.8922	18.2428	319	0.8588	20.0765	317	0.8583	21.0958	238	0.8284	16.1786
ENSRNOG00000001351	Trafd1	2466	149	0.8455	16.9071	285	0.9781	29.5436	231	0.9448	25.4686	373	0.9736	37.2318	251	0.9298	28.4212	243	0.9635	24.8964	316	0.9663	31.8967	315	0.9688	32.9692	270	0.9736	28.5729	271	0.9659	29.1867	336	0.9882	38.2644	248	0.9465	28.8493
ENSRNOG00000014093	Tom1	2200	149	0.8114	18.9513	189	0.9682	21.961	173	0.945	21.3801	215	0.9577	24.0555	167	0.9295	21.1961	195	0.9641	22.3942	153	0.9327	17.311	176	0.9532	20.6481	146	0.9136	17.3186	168	0.9386	20.2813	178	0.9527	22.722	170	0.9341	22.1668
ENSRNOG00000046502	Lonp1	2955	149	0.7577	14.1093	353	0.9174	30.5372	296	0.9381	27.2346	408	0.9387	33.9861	308	0.931	29.1042	301	0.9113	25.7355	337	0.9787	28.3873	366	0.9188	31.9679	320	0.9611	28.2602	25	0.3191	2.24694	25	0.3966	2.37592	25	0.3354	2.42694
ENSRNOG00000014096	Nr3c1	5081	149	0.4792	8.20564	216	0.7747	10.8672	183	0.7209	9.79238	285	0.8185	13.8068	225	0.7136	12.365	185	0.7993	9.19911	260	0.8197	12.7373	238	0.8589	12.0898	178	0.7022	9.14227	239	0.7855	12.4927	222	0.8124	12.2702	185	0.7008	10.4448
ENSRNOG00000050570	Nrbp1	2130	149	0.8657	19.5741	164	0.884	19.6823	180	0.8836	22.9763	227	0.9488	26.2328	176	0.9357	23.0725	181	0.9601	21.4695	207	0.9554	24.1904	215	0.9667	26.0525	217	0.9507	26.5866	186	0.9535	23.1922	200	0.9399	26.3694	185	0.8648	24.9154
ENSRNOG00000036676	Csnk1d	3628	148	0.5921	11.4148	251	0.8509	17.6856	169	0.8029	12.665	277	0.8556	18.7936	178	0.7191	13.6998	222	0.8062	15.46	228	0.7412	15.643	214	0.7856	15.2243	233	0.8666	16.7599	221	0.8261	16.1783	273	0.8313	21.1322	210	0.7715	16.6046
ENSRNOG00000003879	Rnf167	1859	148	0.8069	22.277	155	0.9134	21.314	140	0.8999	20.4755	198	0.9242	26.2171	153	0.9435	22.9813	152	0.8806	20.658	184	0.8596	24.6372	167	0.9059	23.1861	181	0.9231	25.4087	166	0.9484	23.7158	178	0.9209	26.8899	148	0.9177	22.838
ENSRNOG00000014368	Eif4g3	5307	148	0.6505	7.80347	204	0.7622	9.82637	138	0.6233	7.06995	282	0.8758	13.0797	208	0.7741	10.944	167	0.7108	7.95043	220	0.7993	10.3187	221	0.8103	10.7481	192	0.7897	9.44137	213	0.7839	10.6596	222	0.7925	11.7477	132	0.6834	7.13511
ENSRNOG00000033101	MYO18A	6751	148	0.503	6.13435	203	0.6446	7.6867	183	0.6289	7.37003	286	0.7157	10.4279	235	0.655	9.7199	198	0.6464	7.41004	264	0.6997	9.73393	251	0.6907	9.59612	217	0.6627	8.38831	268	0.6851	10.5433	283	0.7729	11.7725	200	0.6572	8.49841
ENSRNOG00000016343	Dkk3	2335	148	0.6839	17.7358	197	0.9332	21.5671	153	0.949	17.8152	261	0.9666	27.5139	189	0.9507	22.6015	205	0.9263	22.1815	195	0.943	20.7874	191	0.9615	21.1124	199	0.9375	22.2407	225	0.964	25.592	207	0.9542	24.8962	176	0.9221	21.6223
ENSRNOG00000030225	Clpx	2390	148	0.8146	17.3276	347	0.9682	37.1145	262	0.9586	29.8051	451	0.9615	46.449	305	0.9695	35.634	345	0.9916	36.4707	136	0.8925	14.1642	136	0.8573	14.6869	136	0.9021	14.8499	344	0.9343	38.2269	403	0.9741	47.354	307	0.954	36.8482
ENSRNOG00000013154	Sfpq	2113	148	0.7851	19.5992	317	0.9598	38.3506	194	0.9418	24.9625	291	0.9631	33.8994	284	0.9673	37.5302	242	0.9839	28.9361	315	0.9645	37.1076	358	0.9749	43.7294	233	0.9863	28.7766	291	0.9839	36.5765	333	0.982	44.2582	220	0.9531	29.8675
ENSRNOG00000000557	Sar1a	2625	148	0.7608	15.7764	278	0.9345	27.0725	231	0.9162	23.9259	306	0.9493	28.6939	286	0.9554	30.4228	294	0.9512	28.2971	258	0.9352	24.4649	285	0.9257	28.0224	289	0.9589	28.7311	245	0.971	24.7882	321	0.9562	34.342	241	0.9356	26.3368
ENSRNOG00000003392	Grsf1	2694	148	0.7075	15.3723	381	0.9213	36.1526	309	0.8879	31.1851	408	0.9421	37.2787	336	0.9436	34.826	396	0.9499	37.1382	345	0.9243	31.8767	406	0.9428	38.8972	340	0.9525	32.9355	343	0.9647	33.8147	409	0.9551	42.6359	307	0.9376	32.6901
ENSRNOG00000001128	Tesc	645	148	0.9349	64.2062	370	0.9922	146.641	472	0.9814	198.961	315	0.9907	120.212	276	0.9876	119.484	486	0.969	190.371	304	0.9752	117.318	333	0.9798	133.252	512	0.9922	207.154	275	0.9876	113.235	396	0.9876	172.419	413	0.9907	183.682
ENSRNOG00000015896	Rbpms2	1870	147	0.7513	21.9964	124	0.923	16.9509	94	0.8904	13.667	145	0.9107	19.0864	107	0.8588	15.9773	129	0.9519	17.429	130	0.8856	17.3043	140	0.9016	19.3231	141	0.9471	19.6771	122	0.9176	17.3272	146	0.9385	21.9261	113	0.9118	17.3346
ENSRNOG00000010747	Dap	1428	147	0.895	28.8048	161	0.9265	28.8211	237	0.9503	45.1239	201	0.9195	34.647	127	0.9027	24.8335	230	0.9027	40.6933	173	0.9748	30.1557	163	0.9258	29.4611	206	0.9237	37.6463	197	0.9293	36.6393	169	0.9223	33.2359	205	0.9272	41.1815
ENSRNOG00000017265	Tmem131	6156	147	0.5117	6.68181	127	0.5741	5.27372	91	0.4446	4.0191	175	0.7016	6.99741	150	0.6468	6.80385	130	0.527	5.33541	167	0.6468	6.75259	152	0.6517	6.37287	134	0.575	5.68053	169	0.6579	7.29117	147	0.5931	6.70607	119	0.5195	5.54529
ENSRNOG00000026034	USP34	10268	147	0.3848	4.00596	163	0.4837	4.05802	123	0.3887	3.25691	246	0.5946	5.89722	176	0.4788	4.78618	162	0.4845	3.98614	188	0.5218	4.55747	200	0.5408	5.0273	142	0.4568	3.60899	211	0.5479	5.45765	217	0.5884	5.93503	150	0.4655	4.19065
ENSRNOG00000015733	Myl12b	1192	147	0.7475	34.5077	142	0.8993	30.4526	96	0.8389	21.8968	134	0.8867	27.6711	118	0.8842	27.6419	125	0.8138	26.4946	122	0.8523	25.4763	136	0.8893	29.4478	123	0.8951	26.9285	135	0.8305	30.0792	137	0.8792	32.277	117	0.8951	28.1569
ENSRNOG00000012323	Cherp	4084	147	0.6567	10.0718	133	0.6832	8.32488	94	0.6197	6.2579	163	0.7125	9.82426	121	0.6614	8.27298	125	0.6322	7.73299	106	0.6479	6.46059	122	0.6232	7.71018	107	0.6217	6.83724	119	0.619	7.73874	102	0.5894	7.01397	115	0.6141	8.07771
ENSRNOG00000039980	Slc25a5	1258	147	0.7878	32.6973	417	0.8983	84.7359	421	0.8927	90.9888	477	0.8808	93.3331	327	0.8466	72.582	495	0.8426	99.4141	376	0.8593	74.3977	378	0.8824	77.5535	431	0.8895	89.4087	385	0.8792	81.281	377	0.837	84.1608	359	0.8704	81.8634
ENSRNOG00000034015	Capn2	3512	147	0.6785	11.7122	210	0.8169	15.2854	185	0.7893	14.322	256	0.8949	17.9425	212	0.8368	16.8556	204	0.7805	14.6757	254	0.8656	18.0024	224	0.8255	16.462	217	0.8209	16.1246	185	0.8032	13.9903	246	0.8639	19.6712	187	0.7583	15.2744
ENSRNOG00000016152	Dek	2551	147	0.6605	16.1243	253	0.942	25.3526	204	0.9314	21.7423	283	0.9745	27.307	221	0.951	24.1904	234	0.9361	23.1755	209	0.9483	20.3933	241	0.9624	24.3835	194	0.8777	19.8461	238	0.9553	24.7785	255	0.962	28.0724	200	0.9036	22.4903
ENSRNOG00000015888	Larp4b	5686	147	0.5558	7.23412	204	0.7738	9.1714	146	0.6541	6.98124	290	0.8706	12.5542	205	0.7575	10.0672	140	0.6549	6.22078	232	0.8357	10.1562	231	0.8428	10.4857	199	0.7533	9.13333	248	0.8663	11.5839	275	0.8517	13.5824	163	0.6746	8.2235
ENSRNOG00000016281	Col4a1	6579	147	0.5282	6.2522	239	0.7801	9.28646	284	0.8542	11.7367	275	0.7723	10.2889	223	0.7538	9.4647	426	0.9067	16.3596	239	0.7767	9.04254	203	0.7275	7.96391	352	0.8854	13.9626	232	0.7977	9.36563	278	0.7995	11.8668	299	0.8217	13.0373
ENSRNOG00000019145	Kdm2a	6783	147	0.4452	6.06416	149	0.5792	5.61535	92	0.4389	3.68767	193	0.6727	7.0038	153	0.6056	6.29842	141	0.5415	5.25195	183	0.6101	6.71555	182	0.6441	6.92532	130	0.5287	5.00155	161	0.6202	6.30395	156	0.6154	6.4588	112	0.5212	4.73666
ENSRNOG00000003206	Actr3	2089	147	0.7717	19.6904	268	0.9349	32.7951	241	0.9493	31.3664	348	0.967	41.0052	256	0.9368	34.2187	274	0.9775	33.1387	306	0.9665	36.4616	310	0.9933	38.3013	250	0.9885	31.2309	263	0.9746	33.4369	326	0.9689	43.8257	268	0.9785	36.8021
ENSRNOG00000012303	Apobec2	1230	146	0.8715	33.2141	282	0.9602	58.6079	250	0.9602	55.2613	257	0.9577	51.4311	233	0.9577	52.8948	257	0.9512	52.79	245	0.948	49.5808	298	0.9724	62.5319	291	0.9618	61.7406	214	0.926	46.208	298	0.9545	68.0394	227	0.9423	52.9416
ENSRNOG00000020552	Fosl1	1663	146	0.745	24.5661	164	0.9194	25.2095	151	0.9224	24.6872	135	0.9212	19.982	139	0.917	23.3391	139	0.8521	21.1177	145	0.9122	21.7034	133	0.902	20.6419	117	0.9068	18.3602	145	0.9086	23.1571	146	0.9447	24.6553	138	0.9206	23.8047
ENSRNOG00000018091	Gdi2	2178	146	0.8921	18.7573	333	0.9669	39.084	321	0.978	40.0713	392	0.9949	44.3023	307	0.9747	39.3589	377	0.9931	43.7328	302	0.9692	34.5145	359	0.9995	42.5429	324	0.9821	38.8213	304	0.9596	37.0702	322	0.994	41.519	317	0.9826	41.752
ENSRNOG00000017752	Mccc2	2142	146	0.8917	19.0725	354	0.9902	42.247	299	0.951	37.9523	425	0.9944	48.8391	307	0.9725	40.0204	375	0.9795	44.2319	326	0.9963	37.8835	346	0.9837	41.6914	390	0.9823	47.5147	29	0.4244	3.59573	29	0.3796	3.80214	29	0.4636	3.88378
ENSRNOG00000000585	Amd1	3154	146	0.6598	12.9529	308	0.8576	24.9633	209	0.8053	18.0165	337	0.936	26.3006	231	0.8653	20.4509	251	0.9087	20.1065	264	0.9128	20.835	284	0.8966	23.2406	266	0.8789	22.0091	252	0.903	21.2201	281	0.9071	25.0204	240	0.8348	21.8286
ENSRNOG00000009078	Mrpl37	1466	146	0.8377	27.8672	208	0.9263	36.2695	192	0.9243	35.6085	179	0.8772	30.055	162	0.837	30.8562	183	0.9086	31.5385	176	0.9454	29.8835	189	0.9461	33.275	205	0.9563	36.4924	146	0.9502	26.4501	181	0.9482	34.6732	178	0.9263	34.8307
ENSRNOG00000007842	Aup1	1456	146	0.8166	28.0586	166	0.9554	29.1447	156	0.9313	29.1306	177	0.9327	29.9233	151	0.9382	28.9586	178	0.9478	30.8875	149	0.8427	25.4728	131	0.8826	23.222	181	0.9451	32.4414	166	0.9341	30.28	152	0.9231	29.3178	164	0.9361	32.3116
ENSRNOG00000003747	Asna1	1348	146	0.7329	30.3067	130	0.8939	24.6528	126	0.8843	25.4137	123	0.8501	22.4602	122	0.8264	25.2716	127	0.8568	23.8033	125	0.8568	23.0819	122	0.8205	23.3593	136	0.9169	26.3289	145	0.8999	28.5685	152	0.9154	31.6667	112	0.8657	23.8344
ENSRNOG00000031167	SRXN1	773	146	0.4994	52.8504	90	0.555	29.7629	74	0.5032	26.0279	133	0.4411	42.3516	73	0.5563	26.3697	82	0.4476	26.8014	23	0.4657	7.40629	23	0.4386	7.6796	23	0.3389	7.76482	89	0.4398	30.5787	95	0.4554	34.5138	70	0.4981	25.9773
ENSRNOG00000012733	Ankrd12	9751	145	0.3582	4.16097	166	0.4323	4.35182	113	0.3535	3.15076	168	0.4678	4.2409	165	0.4758	4.72495	134	0.41	3.47199	157	0.4323	4.00777	150	0.4452	3.97038	144	0.4406	3.85386	176	0.4515	4.79372	183	0.5046	5.27049	121	0.3837	3.55969
ENSRNOG00000001271	Card6	4239	145	0.6877	9.5715	119	0.6912	7.17622	74	0.5506	4.7463	151	0.7674	8.76823	115	0.6461	7.57524	86	0.6141	5.12576	131	0.7594	7.69237	156	0.7738	9.49842	90	0.611	5.54067	116	0.6834	7.26781	107	0.666	7.08875	79	0.5688	5.34613
ENSRNOG00000019023	Tars	2429	145	0.8246	16.7038	253	0.949	26.626	223	0.9238	24.9611	265	0.9555	26.8545	242	0.9522	27.8195	212	0.9152	22.0512	269	0.9568	27.5662	251	0.9716	26.6708	237	0.9753	25.4627	240	0.9354	26.2417	260	0.9737	30.0604	191	0.949	22.557
ENSRNOG00000009936	Dido1	6771	145	0.5256	5.99226	132	0.5776	4.98349	105	0.524	4.21622	181	0.694	6.57997	158	0.6039	6.51578	111	0.519	4.14184	160	0.6179	5.88192	148	0.5568	5.64156	140	0.5775	5.39583	135	0.5847	5.29529	140	0.5367	5.80663	104	0.5219	4.40612
ENSRNOG00000031129	Carm1	3208	145	0.6079	12.6476	137	0.678	10.9169	112	0.6004	9.49227	220	0.6877	16.8805	121	0.5873	10.5321	140	0.6144	11.026	166	0.639	12.8803	174	0.6434	13.9993	131	0.6387	10.6566	157	0.6506	12.9979	135	0.6886	11.8181	129	0.6437	11.5354
ENSRNOG00000008256	Mrpl38	1305	145	0.8812	31.0909	138	0.9433	27.0322	127	0.9157	26.4594	134	0.9249	25.2751	105	0.8789	22.4668	142	0.9556	27.4917	118	0.9057	22.5073	126	0.9073	24.9201	136	0.9824	27.1964	115	0.8759	23.4043	155	0.9801	33.3557	112	0.908	24.6197
ENSRNOG00000020905	Hdac5	2930	145	0.8181	13.8476	235	0.9396	20.5028	184	0.9256	17.0741	260	0.9447	21.8426	224	0.9355	21.3473	182	0.8891	15.6938	232	0.9157	19.7094	208	0.8986	18.3226	226	0.9317	20.1291	201	0.8918	18.2195	248	0.9413	23.7702	215	0.9249	21.0497
ENSRNOG00000019282	Ubqln1	2273	145	0.8223	17.8502	235	0.952	26.429	190	0.9349	22.7269	254	0.941	27.5063	203	0.9353	24.9378	210	0.974	23.3423	215	0.9133	23.5446	232	0.967	26.3438	219	0.9652	25.1436	222	0.949	25.9396	204	0.9217	25.2046	196	0.9586	24.7362
ENSRNOG00000019568	Jund	1026	144	0.9094	39.2727	142	0.9815	35.3796	139	0.925	36.8344	167	0.9981	40.0652	132	0.9094	35.9243	137	0.9864	33.7362	139	0.9815	33.7225	136	0.9766	34.2123	139	0.9825	35.355	136	0.9444	35.2047	162	0.963	44.3422	112	0.9055	31.3146
ENSRNOG00000018325	Cnppd1	2213	144	0.7628	18.2078	197	0.9553	22.7561	181	0.9435	22.2374	262	0.9679	29.1419	170	0.9521	21.4501	191	0.8816	21.806	226	0.9553	25.4202	209	0.9028	24.3756	207	0.9634	24.4102	224	0.9376	26.8829	202	0.9634	25.6342	172	0.9227	22.2958
ENSRNOG00000018642	Leng8	5657	144	0.4706	7.12281	134	0.61	6.05523	109	0.4881	5.23874	172	0.6505	7.48411	159	0.6387	7.84825	118	0.5496	5.27011	133	0.5674	5.85218	168	0.6838	7.66502	147	0.5839	6.78132	128	0.5533	6.00942	163	0.6182	8.0919	123	0.5618	6.23728
ENSRNOG00000002667	Lamc2	5157	144	0.4126	7.81341	184	0.6029	9.1208	123	0.5302	6.48477	215	0.6647	10.2622	166	0.6766	8.98821	145	0.5651	7.10386	177	0.5734	8.54335	172	0.6194	8.60838	170	0.657	8.6027	179	0.6069	9.2186	182	0.6457	9.91114	151	0.6194	8.39955
ENSRNOG00000003822	Slu7	2256	144	0.8298	17.8607	222	0.9344	25.1551	138	0.8785	16.6313	196	0.9291	21.3853	203	0.93	25.1257	205	0.9437	22.9582	203	0.922	22.398	231	0.9623	26.4279	160	0.902	18.5082	205	0.9473	24.1337	240	0.9703	29.8759	176	0.9441	22.3795
ENSRNOG00000005087	Cebpz	4004	144	0.6841	10.0634	232	0.7837	14.8117	175	0.7035	11.8831	218	0.776	13.4017	176	0.7542	12.2738	170	0.743	10.727	177	0.7353	11.0035	203	0.7205	13.0856	176	0.7448	11.471	172	0.7378	11.4089	232	0.7837	16.2721	170	0.6933	12.1795
ENSRNOG00000015417	Kansl3	4433	144	0.6395	9.0895	165	0.7503	9.51477	117	0.6497	7.17587	183	0.7647	10.1614	155	0.7573	9.76329	162	0.741	9.23296	156	0.7609	8.7595	187	0.7769	10.8876	148	0.7695	8.71258	190	0.8256	11.3832	173	0.8195	10.9597	133	0.7595	8.60657
ENSRNOG00000048890	-	798	144	0.1667	50.4934	238	0.1667	76.2406	192	0.1754	65.4161	293	0.2293	90.378	135	0.1654	47.2382	140	0.1591	44.325	236	0.1767	73.6142	206	0.1742	66.6277	386	0.2381	126.231	155	0.1767	51.5867	183	0.1817	64.4017	95	0.1604	34.1505
ENSRNOG00000008338	Bsdc1	2657	144	0.7335	15.1651	157	0.8303	15.105	141	0.8476	14.4283	174	0.863	16.1197	150	0.7926	15.7638	155	0.8389	14.7388	175	0.8152	16.3945	145	0.8047	14.0853	169	0.8555	16.5989	176	0.8325	17.5926	170	0.8468	17.9683	147	0.7877	15.8709
ENSRNOG00000019831	Samd4b	4298	144	0.6035	9.375	131	0.6836	7.79143	105	0.607	6.64216	142	0.7757	8.13243	101	0.6517	6.56171	120	0.6885	7.05405	120	0.6224	6.94972	111	0.675	6.66572	115	0.6154	6.98256	130	0.6903	8.03315	123	0.701	8.03689	122	0.675	8.14272
ENSRNOG00000019975	Cdc5l	2826	144	0.77	14.2582	219	0.9409	19.81	186	0.9137	17.8948	236	0.9381	20.556	195	0.8967	19.2675	183	0.9154	16.3607	230	0.9335	20.2585	240	0.9646	21.9194	198	0.9059	18.2842	212	0.9515	19.9238	247	0.9487	24.5456	182	0.9607	18.4746
ENSRNOG00000019730	Inppl1	3669	143	0.6996	10.906	173	0.8673	12.0534	118	0.7075	8.74421	256	0.8915	17.1748	182	0.7675	13.8511	132	0.7367	9.0897	192	0.8166	13.0258	200	0.8395	14.0693	154	0.7697	10.9536	12	0.1297	0.868645	12	0.1256	0.918508	12	0.1488	0.93823
ENSRNOG00000003998	Sgca	1693	143	0.7809	23.6349	254	0.8559	38.3521	260	0.8411	41.7545	268	0.8683	38.9651	237	0.8842	39.0889	287	0.8777	42.83	236	0.8535	34.6982	257	0.8872	39.1802	254	0.8978	39.1525	232	0.85	36.3949	270	0.8901	44.7874	237	0.8104	40.1576
ENSRNOG00000002270	Hnrnpdl	1316	143	0.9187	30.4057	253	0.962	49.1447	172	0.8663	35.5352	280	0.9445	52.3721	221	0.9552	46.892	204	0.8815	39.165	243	0.959	45.9624	240	0.9172	47.0702	200	0.8906	39.6604	231	0.9149	46.6192	248	0.9787	52.9231	161	0.8769	35.0951
ENSRNOG00000012693	Pmpcb	1583	143	0.9267	25.2773	341	0.9785	55.0663	323	0.9722	55.4764	68	0.8231	10.5737	68	0.8155	11.9947	68	0.8654	10.853	320	0.9848	50.3178	346	0.9741	56.4138	331	0.9716	54.567	289	0.9646	48.4871	363	0.9836	64.3984	341	0.9665	61.7944
ENSRNOG00000011667	Fastk	1609	143	0.8639	24.8688	179	0.8713	28.4387	162	0.8894	27.3745	170	0.8328	26.007	124	0.8459	21.5193	168	0.8919	26.3801	31	0.5022	4.79576	31	0.4525	4.97274	31	0.5886	5.02792	14	0.3232	2.3109	14	0.3344	2.44355	14	0.2641	2.49602
ENSRNOG00000017206	Igfbp5	5839	143	0.6285	6.85287	76	0.4468	3.32726	41	0.2583	1.90911	152	0.6698	6.40772	101	0.567	4.82998	59	0.3739	2.55292	17	0.136	0.724707	17	0.1134	0.751451	17	0.1283	0.75979	141	0.6196	6.41342	96	0.5251	4.61724	49	0.3322	2.40732
ENSRNOG00000014516	Hs6st1	3269	143	0.7645	12.2404	162	0.8412	12.6681	112	0.7516	9.31514	131	0.8155	9.86403	96	0.621	8.20009	96	0.7186	7.41959	149	0.822	11.3455	125	0.7697	9.86928	118	0.8198	9.41998	14	0.1881	1.13742	14	0.1875	1.20271	14	0.1881	1.22854
ENSRNOG00000012582	Eif4ebp1	829	143	0.9517	48.2677	230	0.9759	70.9227	229	0.9783	75.1048	247	0.9614	73.3399	180	0.9457	60.629	240	0.9578	73.1442	213	0.9686	63.9554	199	0.9723	61.9568	227	0.9759	71.4586	185	0.9795	59.2688	257	0.971	87.0618	212	0.9554	73.3597
ENSRNOG00000025509	Apbb2	5704	142	0.4737	6.96601	177	0.6227	7.93242	137	0.5349	6.53022	162	0.5452	6.99091	136	0.5759	6.65766	149	0.581	6.59979	188	0.632	8.20409	161	0.5715	7.28512	164	0.5819	7.50321	167	0.5943	7.77581	192	0.604	9.45303	151	0.5671	7.59405
ENSRNOG00000007128	Nop56	1908	142	0.8422	20.825	309	0.9727	41.3992	236	0.9607	33.6295	279	0.9958	35.9935	277	0.9659	40.5381	324	0.9686	42.9032	304	0.9696	39.6595	308	0.9738	41.6642	249	0.9575	34.0568	247	0.9596	34.3817	320	0.9733	47.1	236	0.9638	35.4821
ENSRNOG00000025680	Nipbl	8046	142	0.5055	4.93837	233	0.7211	7.40266	168	0.6053	5.67696	286	0.7816	8.74952	245	0.7215	8.50253	175	0.6387	5.49517	255	0.7284	7.88883	256	0.7563	8.21202	185	0.6468	6.00032	254	0.7511	8.38422	270	0.7576	9.42395	195	0.6454	6.95233
ENSRNOG00000006966	Nfia	3049	142	0.6396	13.0319	106	0.672	8.88711	71	0.6432	6.33122	121	0.7648	9.76846	103	0.7727	9.43283	70	0.5894	5.80048	122	0.8275	9.95989	120	0.7996	10.1581	90	0.7763	7.70315	126	0.7439	10.9754	115	0.7757	10.5923	88	0.6858	8.27945
ENSRNOG00000005963	Rab2a	1002	142	0.7994	39.6548	212	0.976	54.0854	183	0.9162	49.6558	220	0.9731	54.0447	174	0.9591	48.489	188	0.9721	47.4038	191	0.9551	47.448	198	0.975	51.0021	185	0.9721	48.1822	200	0.9032	53.0116	218	0.9741	61.0996	196	0.8902	56.1131
ENSRNOG00000017719	-	984	141	0.6514	40.0958	111	0.6199	28.8363	82	0.565	22.6571	114	0.6484	28.5173	110	0.6128	31.2147	102	0.6199	26.1896	117	0.6098	29.5967	121	0.6474	31.7381	105	0.6392	27.8469	121	0.5722	32.6587	134	0.6026	38.2436	99	0.5823	28.8613
ENSRNOG00000025011	Chd8	8425	141	0.4374	4.683	130	0.4574	3.94444	107	0.376	3.45303	190	0.5809	5.55114	168	0.5366	5.56803	117	0.4658	3.50864	152	0.5421	4.49082	192	0.6332	5.88195	118	0.4495	3.65506	152	0.5155	4.79162	166	0.5594	5.53334	124	0.4573	4.22209
ENSRNOG00000008682	Mtch2	2330	141	0.597	16.9332	503	0.9039	55.1854	498	0.903	58.1112	481	0.8987	50.8145	412	0.8652	49.3746	618	0.9245	67.0125	422	0.8648	45.0826	479	0.9	53.0603	538	0.8597	60.2573	466	0.8137	53.1177	542	0.8361	65.327	449	0.8511	55.2798
ENSRNOG00000010728	Stradb	2351	141	0.7563	16.7819	198	0.8541	21.529	203	0.8541	23.4763	305	0.8694	31.9334	204	0.8988	24.2292	228	0.8567	24.5022	215	0.8545	22.7634	222	0.8958	24.372	211	0.8856	23.4214	14	0.1935	1.58156	14	0.2582	1.67234	14	0.2535	1.70825
ENSRNOG00000001592	Cct8	2521	141	0.7434	15.6503	460	0.8271	46.6441	335	0.8409	36.1292	453	0.8509	44.2307	396	0.7902	43.8616	414	0.8187	41.4907	398	0.7937	39.2973	467	0.8025	47.8117	378	0.8251	39.1293	441	0.8437	46.4595	510	0.7917	56.8129	317	0.7739	36.0714
ENSRNOG00000047756	Mef2a	3233	141	0.6635	12.2036	202	0.8599	15.9719	114	0.7358	9.58706	239	0.8992	18.1966	209	0.8562	18.0511	156	0.8574	12.1911	185	0.832	14.2436	166	0.8939	13.2523	155	0.8364	12.5115	186	0.8608	15.2797	199	0.8924	17.2861	131	0.8129	11.6236
ENSRNOG00000031709	Ppfibp1	3264	140	0.7598	12.002	256	0.9029	20.0494	205	0.8306	17.0762	377	0.9256	28.4308	236	0.8496	20.1894	265	0.89	20.5125	287	0.8995	21.8869	281	0.8851	22.2201	269	0.8983	21.5073	289	0.9154	23.5156	302	0.9066	25.984	241	0.8735	21.1808
ENSRNOG00000019892	Lrrfip1	3628	140	0.6067	10.7978	306	0.8947	21.5609	178	0.7566	13.3395	262	0.8735	17.7759	294	0.8977	22.6278	225	0.8536	15.6689	247	0.8291	16.9466	306	0.9236	21.7693	206	0.8545	14.8178	282	0.8771	20.6439	319	0.8972	24.6929	230	0.8746	18.186
ENSRNOG00000011414	Psmc3	1626	140	0.8905	24.0925	363	0.9982	57.0687	301	0.9459	50.3306	279	0.9588	42.2359	221	0.9219	37.9519	327	0.9606	50.8102	267	0.9207	40.8736	304	0.9545	48.2551	345	0.9766	55.3709	29	0.5873	4.73681	29	0.5461	5.00872	29	0.5277	5.11627
ENSRNOG00000009430	Gnl2	2292	140	0.7989	17.0918	209	0.9372	23.3101	164	0.9014	19.4543	212	0.9424	22.7677	194	0.9546	23.6347	164	0.9127	18.0781	207	0.9215	22.4806	224	0.9428	25.2246	176	0.8866	20.0392	186	0.9603	21.553	216	0.9263	26.466	165	0.9197	20.6512
ENSRNOG00000030245	Tango2	1664	140	0.8209	23.5424	334	0.9561	51.3104	266	0.9483	43.4625	289	0.9766	42.7506	269	0.9675	45.1399	271	0.9219	41.1471	279	0.9874	41.7353	299	0.9766	46.3776	267	0.9441	41.8737	259	0.9621	41.3386	303	0.9477	51.1374	226	0.9706	38.9611
ENSRNOG00000021200	Hfe2	2119	140	0.8655	18.4872	270	0.9783	32.572	202	0.9571	25.9183	297	0.9811	34.5004	250	0.975	32.9436	220	0.966	26.231	276	0.9948	32.4213	271	0.9967	33.0087	257	0.9821	31.6508	232	0.9783	29.0781	332	0.9962	44.0004	219	0.9443	29.6476
ENSRNOG00000019980	Tomm20	980	140	0.8673	39.974	322	0.9969	83.9928	336	0.9949	93.218	341	0.9918	85.6498	268	0.9918	76.3609	372	0.9969	95.9048	289	0.9959	73.4047	309	0.9959	81.3809	299	0.9969	79.6211	267	0.9918	72.3593	331	0.9908	94.853	314	0.9969	91.9136
ENSRNOG00000012004	Ubap1	2636	140	0.7621	14.8613	141	0.8725	13.6737	95	0.797	9.79862	170	0.8551	15.8746	130	0.838	13.7708	141	0.8346	13.5144	170	0.8562	16.053	131	0.8388	12.8267	147	0.8668	14.5531	165	0.86	16.6245	127	0.7906	13.5303	132	0.8346	14.365
ENSRNOG00000010155	Pcm1	6627	140	0.5215	5.91134	238	0.7599	9.18062	147	0.5001	6.03097	272	0.7445	10.103	202	0.723	8.51131	159	0.6374	6.06183	227	0.6962	8.52631	236	0.7343	9.19148	167	0.6057	6.57631	232	0.7144	9.29779	222	0.6597	9.40774	157	0.6431	6.79608
ENSRNOG00000017210	Slc22a23	6657	139	0.435	5.84267	190	0.6441	7.29604	138	0.5735	5.63621	258	0.7194	9.5398	184	0.6407	7.71794	157	0.5926	5.9586	223	0.6549	8.33832	203	0.6405	7.8706	171	0.5776	6.70348	205	0.6536	8.1787	216	0.6652	9.11223	150	0.5731	6.46381
ENSRNOG00000025885	RGD1305422	2868	139	0.7772	13.5616	199	0.9006	17.7372	119	0.7901	11.2812	226	0.9107	19.3967	188	0.8741	18.3038	119	0.8016	10.4831	201	0.9031	17.4449	194	0.8964	17.4587	147	0.8633	13.3758	152	0.8274	14.0758	204	0.9195	19.9756	124	0.8194	12.4028
ENSRNOG00000021871	Gcn1l1	8532	139	0.4062	4.55868	214	0.6283	6.41173	155	0.5206	4.93932	276	0.7304	7.96263	197	0.6136	6.44729	220	0.6372	6.51471	215	0.5989	6.27249	232	0.6847	7.01823	205	0.6267	6.27027	203	0.5884	6.31908	246	0.6785	8.09717	180	0.5377	6.05198
ENSRNOG00000048205	Ube2h	4266	139	0.6381	9.11736	291	0.9337	17.4375	192	0.8218	12.2368	358	0.943	20.6567	265	0.891	17.3455	227	0.8568	13.444	309	0.9175	18.0298	295	0.9081	17.8481	223	0.8514	13.6417	287	0.918	17.8678	271	0.8959	17.8401	195	0.8181	13.1126
ENSRNOG00000008921	Dynll2	2323	139	0.7869	16.7433	238	0.926	26.1903	238	0.9019	27.8557	244	0.9475	25.8547	206	0.8614	24.7617	250	0.8833	27.1903	249	0.8713	26.681	221	0.9161	24.5546	242	0.9126	27.1862	201	0.9109	22.9803	257	0.9079	31.0694	220	0.8648	27.1675
ENSRNOG00000023127	Pelo	1565	139	0.9259	24.8528	255	0.9719	41.6522	265	0.9955	46.0382	304	0.9891	47.8143	230	0.9789	41.037	281	0.9866	45.3644	255	0.9559	40.5581	238	0.984	39.2512	277	0.9872	46.19	258	0.9866	43.7839	281	0.9681	50.4245	275	0.9911	50.4074
ENSRNOG00000014076	Mbnl1	1164	139	0.9261	33.4147	146	0.9613	32.0636	74	0.9046	17.2848	223	0.9622	47.1574	163	0.9725	39.1018	106	0.9613	23.0079	157	0.9639	33.5737	163	0.9631	36.1431	126	0.9313	28.2488	176	0.9424	40.1577	160	0.9768	38.6026	122	0.9416	30.0665
ENSRNOG00000000990	Pdap1	1221	139	0.7674	31.8548	234	0.9656	48.9906	199	0.9255	44.3123	205	0.8984	41.3272	208	0.9124	47.5674	240	0.8444	49.6614	187	0.8632	38.1222	200	0.9058	42.277	212	0.8534	45.311	174	0.8313	37.848	216	0.9247	49.6807	189	0.9042	44.404
ENSRNOG00000036701	Actg1	1824	138	0.5899	21.1704	270	0.688	37.84	288	0.688	42.9293	178	0.6606	24.0211	185	0.6617	28.321	265	0.6809	36.7066	209	0.6743	28.5216	220	0.6711	31.1306	223	0.6732	31.9053	222	0.6694	32.3249	247	0.6749	38.0296	244	0.6738	38.3743
ENSRNOG00000019758	Ipo13	3572	138	0.7268	10.8104	179	0.8387	12.8101	171	0.8889	13.0158	250	0.9017	17.2277	164	0.8466	12.8202	176	0.8287	12.4487	203	0.848	14.1461	186	0.8057	13.4398	211	0.9155	15.4154	171	0.8211	12.7143	203	0.8676	15.96	195	0.9037	15.6603
ENSRNOG00000029399	Bcam	2358	138	0.8083	16.3761	171	0.9275	18.5381	152	0.9063	17.5261	187	0.9029	19.5207	126	0.8859	14.9207	171	0.9012	18.3221	164	0.8783	17.3122	160	0.9037	17.5132	159	0.9292	17.5969	155	0.8647	17.4581	191	0.9419	22.7478	152	0.9114	18.4917
ENSRNOG00000021581	Rapgef2	6496	138	0.4921	5.9444	190	0.7346	7.47687	111	0.4898	4.64583	272	0.8136	10.3067	180	0.6743	7.73728	148	0.6259	5.75624	197	0.7421	7.5487	200	0.7172	7.94647	131	0.5531	5.2627	187	0.678	7.64548	198	0.6935	8.55989	152	0.5834	6.71233
ENSRNOG00000006304	Mdm2	2855	138	0.6764	13.5253	363	0.9489	32.5022	228	0.8883	21.7128	356	0.9296	30.6932	300	0.9443	29.3412	296	0.9419	26.1944	273	0.8778	23.8017	323	0.9569	29.2003	275	0.938	25.1368	296	0.9401	27.5356	346	0.9646	34.0345	249	0.9163	25.019
ENSRNOG00000009244	Abhd4	2399	138	0.6411	16.0962	178	0.9566	18.9671	141	0.8404	15.9799	214	0.9483	21.9574	169	0.9062	19.6706	189	0.9066	19.9047	176	0.8962	18.2614	173	0.8912	18.6126	195	0.9183	21.2123	10	0.1892	1.10708	10	0.1759	1.17063	10	0.1859	1.19576
ENSRNOG00000015852	-	3834	138	0.7267	10.0717	190	0.8425	12.6682	100	0.6607	7.09144	324	0.9147	20.8013	192	0.8414	13.9833	158	0.7919	10.4119	239	0.8571	15.5167	264	0.9025	17.7722	225	0.9006	15.3149	248	0.9184	17.1794	229	0.8764	16.7738	171	0.8002	12.7944
ENSRNOG00000016369	Eci2	1573	138	0.8779	24.5485	263	0.972	42.7405	231	0.9485	39.9273	256	0.9701	40.0599	218	0.9498	38.6981	253	0.9237	40.6364	215	0.9212	34.0222	225	0.9549	36.9185	270	0.9574	44.7938	215	0.9619	36.301	278	0.9752	49.6324	226	0.9701	41.215
ENSRNOG00000000827	Ier3	1097	137	0.9389	34.9453	226	0.9845	52.664	219	0.9836	54.278	263	0.9872	59.0129	166	0.9827	42.2536	266	0.9854	61.263	210	0.9818	47.6502	160	0.9398	37.6447	189	0.9699	44.9612	241	0.9818	58.3471	198	0.9836	50.6883	233	0.9845	60.9292
ENSRNOG00000007241	Fnbp4	4087	137	0.677	9.37975	146	0.7499	9.13188	101	0.63	6.71898	195	0.8109	11.7443	157	0.7734	10.7265	145	0.7722	8.96369	153	0.7808	9.31835	158	0.7585	9.97798	119	0.7169	7.59846	144	0.7614	9.35765	188	0.7739	12.9182	139	0.7561	9.75632
ENSRNOG00000019601	Mapk3	1781	137	0.7889	21.5244	146	0.9017	20.9556	137	0.8647	20.9143	41	0.5811	5.66654	39	0.5149	6.11453	41	0.6828	5.81625	142	0.9113	19.8462	134	0.8574	19.4192	148	0.8866	21.6861	129	0.8658	19.2369	150	0.9259	23.6525	151	0.922	24.3214
ENSRNOG00000001235	Gna12	3345	137	0.7549	11.4604	278	0.9321	21.2452	235	0.8867	19.1011	313	0.9327	23.0328	196	0.8697	16.3615	294	0.9354	22.2062	242	0.9366	18.0082	252	0.9235	19.4444	283	0.939	22.0787	273	0.91	21.6758	248	0.9238	20.8212	251	0.9127	21.5255
ENSRNOG00000006718	Rbm33	3734	137	0.6735	10.2665	80	0.6122	5.47681	55	0.5415	4.00475	119	0.7657	7.8446	75	0.6454	5.60853	82	0.6644	5.54834	108	0.6845	7.19949	103	0.7006	7.11956	90	0.6232	6.29001	95	0.684	6.75707	104	0.7592	7.82183	83	0.6168	6.37646
ENSRNOG00000017307	Prss23	1849	137	0.8123	20.7328	481	0.9703	66.4998	430	0.9843	63.2293	407	0.9654	54.1821	407	0.9794	61.4638	450	0.9794	61.4892	94	0.8908	12.6544	94	0.8329	13.1214	94	0.9021	13.267	27	0.5533	3.87825	27	0.4878	4.10087	27	0.4786	4.18893
ENSRNOG00000010558	Ppif	1514	137	0.7999	25.3204	175	0.9584	29.5477	124	0.8593	22.2681	192	0.9115	31.2157	123	0.8593	22.6851	133	0.9168	22.1947	138	0.8824	22.6885	139	0.932	23.6962	138	0.9386	23.7868	14	0.3864	2.4559	14	0.3818	2.59688	14	0.3336	2.65264
ENSRNOG00000011339	Slk	3796	137	0.7471	10.0988	208	0.8659	14.0071	110	0.6965	7.87867	217	0.8965	14.0712	181	0.8601	13.3142	161	0.8306	10.7158	179	0.8459	11.7376	202	0.9049	13.7346	138	0.721	9.48715	217	0.863	15.1825	232	0.8878	17.1637	119	0.7258	8.99284
ENSRNOG00000007152	Bhlhe40	2376	137	0.7656	16.1343	154	0.8906	16.5686	130	0.9082	14.8759	301	0.963	31.183	167	0.9398	19.626	178	0.952	18.9277	213	0.9293	22.3144	197	0.9297	21.3998	204	0.923	22.4061	213	0.9558	23.8091	208	0.9394	24.5848	160	0.9108	19.3174
ENSRNOG00000022173	Gatad2a	4510	137	0.5654	8.50001	133	0.6308	7.53854	151	0.6636	9.10305	209	0.7042	11.4069	166	0.6608	10.2776	185	0.706	10.3638	165	0.6557	9.10667	157	0.6665	8.9849	203	0.6869	11.7463	182	0.6539	10.7178	192	0.7166	11.9557	168	0.6743	10.6858
ENSRNOG00000010944	Hyou1	4471	137	0.5703	8.57415	271	0.8768	15.4945	256	0.8461	15.5676	291	0.8895	16.0209	285	0.8484	17.7993	287	0.8763	16.2181	297	0.8586	16.535	325	0.8636	18.7616	287	0.8768	16.7518	249	0.8915	14.7912	307	0.8752	19.2834	246	0.8423	15.7836
ENSRNOG00000000236	Zfp207	1719	137	0.808	22.3008	235	0.9785	34.9465	165	0.9133	26.0972	237	0.9634	33.9368	204	0.9331	33.1372	190	0.9378	27.9255	200	0.9697	28.9605	230	0.9843	34.5336	192	0.9383	29.148	204	0.9395	31.5183	204	0.9366	33.3276	181	0.9412	30.205
ENSRNOG00000003524	Lrrc59	2802	137	0.8223	13.6813	302	0.949	27.5519	260	0.8844	25.2285	303	0.9572	26.6178	266	0.8972	26.5079	328	0.9843	29.5753	264	0.9115	23.4524	281	0.9233	25.8838	311	0.9293	28.9651	255	0.9333	24.1702	305	0.9358	30.569	270	0.93	27.6421
ENSRNOG00000020433	Actn4	3870	137	0.6767	9.90569	189	0.8411	12.4843	168	0.7367	11.8028	178	0.7747	11.3216	155	0.7326	11.1836	189	0.8168	12.3388	167	0.7904	10.7413	176	0.7558	11.7379	195	0.8119	13.1494	154	0.7406	10.5686	228	0.8101	16.5452	203	0.8282	15.0474
ENSRNOG00000045637	Rnf14	2935	137	0.7152	13.0613	257	0.8947	22.384	194	0.861	17.9713	270	0.9114	22.644	199	0.8818	18.9325	235	0.8719	20.2294	255	0.9189	21.6264	273	0.9087	24.0074	201	0.8879	17.8719	224	0.9135	20.2698	268	0.8903	25.6434	196	0.9206	19.1568
ENSRNOG00000005606	Med1	5813	136	0.5507	6.54657	122	0.5766	5.36502	73	0.3764	3.41436	29	0.2192	1.22799	29	0.2094	1.39303	29	0.2095	1.26044	147	0.6052	6.29462	136	0.6214	6.0385	106	0.5496	4.7587	153	0.6186	6.99037	142	0.6563	6.86021	93	0.5121	4.58943
ENSRNOG00000024737	Tnrc6a	5991	136	0.523	6.35206	178	0.7304	7.59509	118	0.5436	5.35512	213	0.76	8.75142	122	0.6081	5.68621	142	0.6161	5.98842	170	0.7176	7.06321	162	0.6917	6.97921	156	0.7152	6.79529	155	0.6855	6.87134	186	0.753	8.71892	131	0.6326	6.27261
ENSRNOG00000015162	Lonp2	2794	136	0.7473	13.6203	272	0.9635	24.886	195	0.8865	18.9756	259	0.9499	22.8177	239	0.9145	23.8855	221	0.8851	19.9843	241	0.9105	21.4705	280	0.9574	25.8656	218	0.9409	20.3617	236	0.9256	22.4334	306	0.9656	30.757	200	0.8901	20.5343
ENSRNOG00000017674	Ctcf	3709	136	0.6676	10.2602	164	0.8606	11.3031	129	0.7576	9.45626	194	0.883	12.8749	143	0.8444	10.7657	132	0.8231	8.99167	185	0.8838	12.4156	170	0.8558	11.8299	134	0.8153	9.42825	181	0.8946	12.9608	179	0.852	13.5533	125	0.7137	9.66783
ENSRNOG00000002664	Emp2	3129	135	0.7421	12.0727	191	0.8865	15.6041	158	0.8539	13.729	196	0.9054	15.4187	183	0.8341	16.3308	166	0.8696	13.4037	170	0.8386	13.5237	203	0.9108	16.7448	133	0.8035	11.0925	205	0.8965	17.4003	170	0.8661	15.2578	168	0.8869	15.4021
ENSRNOG00000021057	Osbp	4407	135	0.5838	8.57168	244	0.8752	14.1533	173	0.7248	10.6731	286	0.8757	15.9743	231	0.8144	14.6363	209	0.8548	11.9819	259	0.8729	14.6288	266	0.8759	15.5786	222	0.8055	13.146	256	0.8668	15.4279	257	0.8561	16.3772	201	0.7774	13.0837
ENSRNOG00000037580	Psmd8	1519	135	0.7722	24.8686	259	0.8255	43.5867	238	0.8677	42.5996	75	0.7235	12.1535	70	0.6932	12.8677	80	0.7439	13.3062	219	0.8249	35.8871	216	0.8209	36.7017	233	0.8157	40.0296	198	0.8361	34.6191	259	0.8736	47.8841	227	0.8446	42.8691
ENSRNOG00000023991	Rab20	1478	135	0.8112	25.5585	270	0.8884	46.6983	209	0.8843	38.4466	287	0.8938	47.7976	200	0.9053	37.7848	251	0.9107	42.9065	257	0.8633	43.2824	227	0.8897	39.6407	229	0.8911	40.4338	245	0.9073	44.0251	268	0.8857	50.9225	222	0.8884	43.0878
ENSRNOG00000019506	Dnajb2	1766	135	0.7667	21.3904	241	0.9485	34.885	196	0.9468	30.1753	266	0.9881	37.0757	206	0.8771	32.5716	232	0.9819	33.191	241	0.8839	33.9687	213	0.9315	31.13	265	0.9422	39.1596	246	0.9677	36.9959	255	0.9043	40.5507	184	0.957	29.8884
ENSRNOG00000023376	Riok3	3843	135	0.5943	9.82966	371	0.7736	24.6783	390	0.7973	27.5918	349	0.7783	22.3539	320	0.7333	23.251	493	0.7937	32.4116	344	0.7879	22.2813	349	0.8007	23.4393	406	0.7624	27.5701	332	0.8087	22.9444	383	0.7692	27.9884	415	0.7986	30.978
ENSRNOG00000043004	Hmgn2	1182	135	0.8773	31.9589	321	0.9628	69.4224	277	0.9772	63.716	265	0.9687	55.1857	258	0.9459	60.9487	324	0.9382	69.255	242	0.9239	50.9624	309	0.9687	67.4732	310	0.9552	68.4427	231	0.9611	51.9043	314	0.9585	74.6039	235	0.9399	57.033
ENSRNOG00000023573	Ccpg1	3016	135	0.6061	12.525	213	0.744	18.0535	122	0.6834	10.998	234	0.7593	19.0978	193	0.7338	17.8685	176	0.756	14.7436	173	0.7324	14.278	246	0.7974	21.052	162	0.7076	14.0174	207	0.7593	18.2284	216	0.759	20.1128	155	0.7245	14.7427
ENSRNOG00000009131	Zc3h12a	2542	135	0.7451	14.8605	86	0.7565	8.64839	65	0.6479	6.95223	131	0.8596	12.6851	66	0.6227	7.24987	59	0.6306	5.86408	103	0.8682	10.0859	73	0.6617	7.41204	60	0.609	6.15969	71	0.6577	7.41808	82	0.7081	9.05915	49	0.6039	5.52964
ENSRNOG00000019944	Fkbp8	1665	135	0.8997	22.6879	197	0.9345	30.2457	191	0.967	31.1893	161	0.9495	23.8018	157	0.9538	26.3298	190	0.9471	28.8312	170	0.9646	25.4148	173	0.9471	26.8177	160	0.955	25.0778	160	0.9616	25.522	213	0.9556	35.9265	191	0.9267	32.9075
ENSRNOG00000009795	Nfib	2190	135	0.784	17.249	139	0.8347	16.2249	96	0.7731	11.9183	39	0.579	4.38348	39	0.4982	4.97259	39	0.5589	4.49929	148	0.8032	16.8217	159	0.8406	18.7389	111	0.774	13.227	183	0.8648	22.193	162	0.8945	20.774	127	0.8187	16.6355
ENSRNOG00000019122	Sec16a	7041	134	0.5073	5.32532	127	0.5336	4.61086	93	0.4626	3.59116	176	0.6753	6.15285	119	0.5472	4.71927	116	0.5092	4.16243	132	0.5644	4.66651	145	0.6131	5.31525	159	0.6535	5.89313	148	0.6205	5.5826	139	0.5387	5.54408	102	0.4727	4.15568
ENSRNOG00000004973	Ppp2r5c	1656	134	0.8853	22.6423	131	0.971	20.222	97	0.84	15.9257	172	0.9589	25.5662	128	0.91	21.583	106	0.9094	16.1722	146	0.9463	21.9455	153	0.9511	23.8463	145	0.9499	22.8502	120	0.8913	19.2455	153	0.8629	25.9466	97	0.8786	16.803
ENSRNOG00000012716	Chd2	6092	134	0.5074	6.15489	167	0.6916	7.00759	110	0.5281	4.9093	207	0.7223	8.3639	148	0.6387	6.78366	111	0.5501	4.60348	180	0.6559	7.3547	161	0.6497	6.82113	123	0.514	5.269	185	0.6417	8.0653	168	0.6991	7.74459	120	0.5967	5.65064
ENSRNOG00000007090	Cacna1c	6513	134	0.4689	5.75704	120	0.5675	4.70991	83	0.4259	3.46484	168	0.6381	6.34931	103	0.5005	4.41589	94	0.444	3.64645	131	0.5727	5.00659	124	0.5454	4.91395	124	0.5785	4.96848	176	0.671	7.17696	130	0.5557	5.60546	97	0.4731	4.27235
ENSRNOG00000012046	Prmt5	2536	134	0.7346	14.7853	167	0.9452	16.8337	114	0.8454	12.222	195	0.9744	18.9271	139	0.8924	15.3048	160	0.942	15.9402	193	0.9326	18.9435	171	0.9716	17.4035	148	0.8939	15.2298	143	0.8517	14.976	193	0.955	21.3726	106	0.8123	11.9904
ENSRNOG00000012385	Naa15	6018	134	0.5133	6.23057	402	0.8536	17.076	307	0.7615	13.8699	380	0.8232	15.5428	327	0.8184	15.1725	320	0.8308	13.4345	339	0.7797	14.0217	339	0.7596	14.5391	276	0.7758	11.9685	336	0.7722	14.8285	409	0.8353	19.0862	280	0.7925	13.3469
ENSRNOG00000011931	Smarca2	4945	134	0.632	7.58252	175	0.7228	9.04657	112	0.6123	6.15798	228	0.8034	11.3492	161	0.6655	9.09121	141	0.6704	7.20404	216	0.7939	10.8728	208	0.8299	10.8564	159	0.7428	8.391	164	0.6989	8.80819	222	0.8354	12.6077	168	0.7379	9.74583
ENSRNOG00000010107	Palld	2241	134	0.8951	16.7316	112	0.8536	12.7758	74	0.772	8.97793	161	0.9237	17.6841	117	0.8322	14.5783	86	0.7532	9.69572	122	0.8255	13.551	131	0.9023	15.0876	86	0.7697	10.0147	131	0.9054	15.5252	117	0.8643	14.662	99	0.8041	12.6727
ENSRNOG00000006532	H3f3b	1655	133	0.8006	22.4869	406	0.9094	62.7105	286	0.8858	46.9845	327	0.8912	48.6349	300	0.8979	50.6157	347	0.8949	52.973	324	0.8931	48.7303	358	0.9088	55.831	293	0.9069	46.2011	304	0.9082	48.7848	356	0.9208	60.4089	325	0.9474	56.3328
ENSRNOG00000015619	Agfg1	3244	133	0.5536	11.4722	229	0.8459	18.0454	202	0.7845	16.93	292	0.8915	22.1565	204	0.7996	17.5595	225	0.7922	17.5237	228	0.8517	17.4947	252	0.8841	20.0498	211	0.8477	16.974	237	0.8243	19.4033	219	0.8776	18.9589	197	0.7993	17.4205
ENSRNOG00000037263	Irak1	3126	133	0.7134	11.9052	154	0.8036	12.5934	166	0.8365	14.438	205	0.872	16.1422	166	0.8311	14.828	177	0.8471	14.3057	182	0.8474	14.4922	213	0.8919	17.5866	169	0.8724	14.1085	181	0.85	15.378	178	0.8177	15.9912	174	0.8644	15.9675
ENSRNOG00000013255	Dnajc8	1394	133	0.8199	26.6971	198	0.9813	36.309	208	0.9311	40.5683	156	0.9376	27.5461	169	0.9476	33.8521	212	0.9247	38.4235	46	0.7862	8.21386	46	0.7726	8.51697	44	0.7116	8.23707	154	0.9598	29.3405	228	0.9663	45.9326	172	0.939	35.395
ENSRNOG00000007901	Tmed10	1320	133	0.8045	28.1938	311	0.9932	60.228	213	0.9667	43.8725	248	0.9674	46.2462	205	0.9606	43.3653	261	0.9841	49.9563	236	0.9371	44.5031	249	0.9879	48.6873	217	0.9818	42.9011	226	0.9871	45.4719	268	0.9492	57.0178	265	0.9864	57.5901
ENSRNOG00000017311	Me3	1965	133	0.8427	18.9393	271	0.9252	35.2549	216	0.941	29.8867	50	0.6794	6.26333	50	0.6682	7.10509	50	0.6433	6.42881	245	0.9328	31.0353	235	0.9399	30.8671	256	0.9282	33.9986	214	0.9415	28.9241	250	0.9354	35.7295	220	0.9333	32.1171
ENSRNOG00000018849	Tcerg1	4366	133	0.563	8.52399	216	0.7996	12.6468	161	0.7164	10.026	267	0.8216	15.0531	200	0.8051	12.7911	193	0.691	11.1686	225	0.8504	12.8278	184	0.7833	10.8774	184	0.7421	10.9981	224	0.7945	13.6262	219	0.7568	14.0867	169	0.7352	11.104
ENSRNOG00000003844	Dhx15	3007	133	0.6358	12.3764	237	0.8816	20.1478	167	0.8826	15.0997	279	0.9255	22.8386	215	0.8843	19.9649	221	0.9395	18.5687	240	0.9139	19.8669	228	0.8573	19.57	189	0.8946	16.4026	235	0.9026	20.756	245	0.9325	22.8814	172	0.8221	16.4086
ENSRNOG00000020812	Gys1	3691	133	0.6405	10.0828	186	0.8778	12.8819	158	0.8391	11.6386	255	0.9296	17.0057	190	0.8586	14.3738	188	0.9065	12.8688	36	0.3777	2.42779	36	0.3972	2.51738	36	0.3557	2.54531	178	0.8537	12.8081	206	0.8973	15.6737	176	0.8301	13.6787
ENSRNOG00000012163	Plekhm2	3268	133	0.8075	11.3879	131	0.7904	10.2471	127	0.7745	10.5659	238	0.9792	17.9264	135	0.7947	11.5349	157	0.8537	12.1378	177	0.9045	13.4817	160	0.8825	12.6365	182	0.9422	14.5336	159	0.9128	12.9218	152	0.8666	13.062	137	0.8522	12.0258
ENSRNOG00000007999	Abra	1282	132	0.9399	28.8112	247	0.9633	49.2517	149	0.9204	31.5998	193	0.929	37.0568	206	0.9594	44.8685	139	0.9509	27.3937	272	0.9618	52.8121	196	0.9516	39.4601	166	0.9571	33.7912	228	0.9633	47.2341	207	0.9259	45.3452	165	0.9618	36.9209
ENSRNOG00000011463	Psmb2	822	132	0.9161	44.9342	204	0.9161	63.4411	176	0.9684	58.214	182	0.9611	54.5002	157	0.9708	53.3323	181	0.9599	55.6327	32	0.7336	9.69015	32	0.8187	10.0477	32	0.6825	10.1592	151	0.9805	48.7881	169	0.9611	57.7383	183	0.9647	63.8639
ENSRNOG00000020386	Ash1l	9231	132	0.4352	4.00129	179	0.5557	4.95697	137	0.4602	4.03514	220	0.6512	5.86641	163	0.532	4.93061	130	0.458	3.5581	168	0.5722	4.53015	195	0.6015	5.45225	159	0.5477	4.49502	233	0.6674	6.70372	225	0.6587	6.84515	125	0.4583	3.88452
ENSRNOG00000001223	Pttg1ip	2277	132	0.8687	16.2213	219	0.9157	24.5863	154	0.8924	18.3884	225	0.9618	24.323	168	0.9214	20.602	242	0.9662	26.8519	223	0.9341	24.3778	200	0.9104	22.6703	207	0.9231	23.7241	181	0.9302	21.1118	216	0.9429	26.6404	186	0.9262	23.4329
ENSRNOG00000027088	Ube2k	4971	132	0.215	7.43028	161	0.2327	8.27931	133	0.2816	7.27435	153	0.279	7.5761	117	0.2163	6.5721	130	0.2507	6.60728	137	0.2496	6.86008	138	0.2472	7.16516	130	0.3022	6.82468	125	0.2482	6.67844	162	0.2772	9.15209	111	0.2442	6.40553
ENSRNOG00000011709	Pum1	5009	132	0.6195	7.37391	179	0.7578	9.13512	111	0.5594	6.02502	207	0.8018	10.1723	174	0.7463	9.69974	152	0.7339	7.66683	165	0.7181	8.19946	190	0.7878	9.79023	162	0.7099	8.44009	197	0.8397	10.4454	151	0.6676	8.46594	116	0.6357	6.64329
ENSRNOG00000019768	Ncoa4	3413	132	0.649	10.8221	186	0.8406	13.9312	151	0.7252	12.0289	230	0.8743	16.5878	156	0.7697	12.7629	171	0.8251	12.6585	171	0.8166	12.4713	195	0.8166	14.7465	199	0.852	15.216	180	0.9039	14.007	195	0.8743	16.0453	137	0.8186	11.5149
ENSRNOG00000020763	Snrnp70	1546	132	0.6636	23.8913	231	0.881	38.1957	164	0.9327	28.8417	218	0.8564	34.7092	185	0.8622	33.4137	201	0.8189	32.8481	169	0.8784	27.2101	206	0.8532	34.3913	205	0.892	34.6041	193	0.8939	33.1556	237	0.859	43.0515	161	0.8823	29.8739
ENSRNOG00000006209	Mbd6	3977	132	0.6925	9.28739	85	0.5836	5.46356	71	0.5559	4.85388	133	0.7237	8.23179	83	0.6341	5.82753	75	0.5874	4.76463	76	0.5899	4.75675	77	0.573	4.99718	88	0.602	5.77444	80	0.5911	5.34249	70	0.5117	4.94301	79	0.5864	5.69833
ENSRNOG00000007203	Psmc6	2379	132	0.5439	15.5258	361	0.7957	38.7905	306	0.7919	34.9714	165	0.7385	17.0721	156	0.6982	18.3102	172	0.7432	18.2666	310	0.7558	32.4354	318	0.6696	34.5003	345	0.8609	37.8449	307	0.7394	34.2731	363	0.7659	42.851	339	0.826	40.8772
ENSRNOG00000018659	Csf1	3953	131	0.5963	9.27299	200	0.8391	12.9335	150	0.7614	10.3169	91	0.635	5.66647	113	0.7293	7.98204	131	0.787	8.37275	152	0.7498	9.57126	171	0.7584	11.165	213	0.8657	14.0616	22	0.2418	1.4781	19	0.1892	1.34982	23	0.1966	1.66908
ENSRNOG00000021437	Hspg2	6498	131	0.4623	5.64114	138	0.5106	5.4289	120	0.4495	5.02097	150	0.566	5.68211	122	0.4515	5.24255	150	0.5086	5.83223	155	0.5694	5.93751	133	0.4595	5.28278	140	0.4938	5.62252	160	0.5602	6.53957	167	0.5762	7.21749	144	0.4931	6.3571
ENSRNOG00000007649	Dnm2	3466	131	0.6275	10.5759	133	0.6872	9.80924	119	0.777	9.3348	172	0.8433	12.2151	112	0.7455	9.02301	131	0.7683	9.54918	147	0.8347	10.557	124	0.7054	9.23386	130	0.7623	9.78809	127	0.7302	9.7316	137	0.8329	11.1005	118	0.7868	9.76629
ENSRNOG00000046227	TPRG1L	1817	131	0.7045	20.174	142	0.8751	19.9777	149	0.8404	22.2955	174	0.8927	23.5718	139	0.8894	21.361	153	0.8586	21.2745	153	0.9048	20.9599	153	0.8745	21.7334	152	0.8888	21.8309	145	0.8872	21.1944	148	0.8547	22.8747	134	0.8663	21.1556
ENSRNOG00000007060	Plin2	1834	131	0.8053	19.987	332	0.9411	46.2755	253	0.9722	37.5066	232	0.9155	31.1377	298	0.9471	45.3711	324	0.9482	44.6343	250	0.9651	33.9307	327	0.9896	46.0192	334	0.9477	47.5259	228	0.9487	33.0175	358	0.9575	54.8192	285	0.9237	44.5781
ENSRNOG00000018289	RGD1560648	915	131	0.8874	40.0613	281	0.9366	78.505	258	0.9279	76.6629	238	0.8831	64.0257	246	0.9672	75.0717	346	0.9716	95.5385	51	0.7989	13.874	56	0.9104	15.7964	58	0.8459	16.5421	259	0.9519	75.1775	352	0.9213	108.037	225	0.8361	70.5403
ENSRNOG00000011633	Parvb	1997	130	0.8252	18.2155	174	0.971	22.2732	129	0.9104	17.563	211	0.9164	26.0077	136	0.9144	19.0162	177	0.9584	22.3933	166	0.9234	20.691	172	0.9479	22.2301	164	0.9785	21.4313	146	0.9269	19.4171	148	0.9264	20.8129	143	0.9389	20.5416
ENSRNOG00000005851	Tmf1	3433	130	0.7341	10.5961	291	0.9015	21.6686	148	0.7917	11.7213	269	0.8934	19.2875	225	0.8707	18.3008	178	0.8299	13.1	235	0.8846	17.0391	268	0.9324	20.1489	177	0.9059	13.455	245	0.9059	18.954	228	0.8998	18.6514	154	0.8351	12.8684
ENSRNOG00000019453	RPS5	737	130	0.9349	49.3573	448	0.9756	155.39	537	0.9769	198.104	357	0.9796	119.234	344	0.9742	130.333	611	0.9607	209.458	379	0.9484	128.004	395	0.9661	138.331	626	0.9688	221.661	366	0.9715	131.893	449	0.9769	171.091	519	0.9593	202.011
ENSRNOG00000014204	Pacsin3	1754	130	0.8689	20.7391	259	0.9823	37.747	238	0.9943	36.8921	233	0.992	32.6983	199	0.9789	31.68	223	0.9704	32.1217	30	0.5274	4.25739	30	0.5239	4.4145	30	0.565	4.46349	18	0.374	2.72554	18	0.3883	2.88199	18	0.3369	2.94387
ENSRNOG00000009781	Dync1i2	2527	130	0.7448	14.3951	295	0.9569	29.8421	207	0.9232	22.2716	310	0.9478	30.1964	210	0.9038	23.2047	242	0.8991	24.1954	249	0.9418	24.5271	232	0.9074	23.6959	187	0.8441	19.3116	257	0.962	27.0108	329	0.9553	36.5628	196	0.9118	22.2498
ENSRNOG00000026316	Wdr43	3431	130	0.6663	10.6022	265	0.9091	19.7441	172	0.8047	13.6299	263	0.8834	18.8683	211	0.833	17.1721	225	0.8537	16.5686	225	0.8245	16.3235	232	0.8616	17.4525	221	0.8516	16.8095	207	0.7925	16.0235	272	0.9041	22.2637	208	0.8499	17.3908
ENSRNOG00000002335	Gspt1	2349	130	0.1673	15.4859	161	0.1984	17.5208	161	0.2009	18.635	175	0.1903	18.3381	145	0.2005	17.2364	142	0.186	15.2732	180	0.186	19.074	175	0.1997	19.2285	144	0.2031	15.9979	155	0.1835	17.525	151	0.2014	18.0527	160	0.1843	19.5395
ENSRNOG00000010902	Tceb3	3491	130	0.7385	10.42	161	0.841	11.7893	111	0.7388	8.64489	173	0.8419	12.1982	132	0.7955	10.5581	144	0.8221	10.4216	163	0.829	11.6222	138	0.8516	10.2028	164	0.8579	12.2596	150	0.7915	11.4117	141	0.8155	11.3428	101	0.711	8.29942
ENSRNOG00000014224	Ndufa3	324	130	0.9414	112.273	287	0.9568	226.438	317	0.9599	266.012	231	0.9444	175.495	244	0.9506	210.284	383	0.9599	298.66	254	0.9383	195.138	238	0.9506	189.593	325	0.9414	261.771	191	0.9414	156.566	287	0.9599	248.763	284	0.9475	251.449
ENSRNOG00000015273	Ak3	1087	130	0.9209	33.4649	266	0.9926	62.5553	172	0.9825	43.0215	195	0.9844	44.1574	152	0.9908	39.046	191	0.9742	44.3943	167	0.9706	38.2419	210	0.9982	49.8632	211	0.9871	50.6566	24	0.7516	5.86396	25	0.667	6.45892	26	0.6651	6.86151
ENSRNOG00000033522	Prdm2	6150	130	0.5371	5.91485	151	0.6403	6.27645	87	0.4694	3.84619	189	0.6449	7.56458	119	0.5608	5.40299	96	0.4914	3.94384	155	0.6112	6.27348	155	0.6558	6.50499	127	0.5841	5.38904	123	0.5746	5.31177	136	0.6239	6.21031	94	0.5289	4.38459
ENSRNOG00000017230	Cox15	3002	130	0.5986	12.1174	201	0.8348	17.1158	138	0.7815	12.4984	208	0.8424	17.055	227	0.8777	21.1143	212	0.8531	17.8422	179	0.8085	14.8421	250	0.8901	21.4941	152	0.7951	13.2134	194	0.8644	17.1633	240	0.8974	22.4517	158	0.8714	15.0981
ENSRNOG00000025042	Pde3a	3426	130	0.6281	10.6177	142	0.8059	10.5953	102	0.6095	8.09467	240	0.8395	17.2434	160	0.8001	13.0405	118	0.6903	8.70198	147	0.6827	10.6803	171	0.8117	12.8825	145	0.7329	11.0449	162	0.7443	12.5585	157	0.7551	12.8695	115	0.6786	9.62912
ENSRNOG00000032888	Mphosph8	5052	130	0.4893	7.20038	215	0.6427	10.879	168	0.5643	9.04133	233	0.7243	11.3525	244	0.6427	13.4862	194	0.6576	9.70201	242	0.6791	11.9235	236	0.6675	12.057	184	0.5715	9.50468	231	0.6718	12.1439	273	0.7173	15.1757	190	0.6576	10.7886
ENSRNOG00000018774	Rps14	456	130	0.8004	79.7726	271	0.8772	151.921	438	0.8816	261.153	215	0.8684	116.057	193	0.8772	118.183	526	0.8794	291.437	197	0.8904	107.536	228	0.8794	129.051	451	0.8904	258.104	247	0.8772	143.86	280	0.8772	172.442	367	0.8904	230.875
ENSRNOG00000031135	Smarcc2	3636	130	0.6749	10.0045	141	0.8042	9.91305	113	0.7335	8.4497	214	0.8936	14.4873	142	0.7981	10.905	152	0.8243	10.5619	160	0.7792	10.9534	133	0.8284	9.441	160	0.725	11.4836	164	0.7726	11.9792	144	0.7643	11.1221	132	0.7175	10.4142
ENSRNOG00000005333	Azin1	4261	130	0.5402	8.53703	322	0.8327	19.3177	192	0.7655	12.2511	353	0.831	20.3921	272	0.809	17.8246	213	0.8233	12.6297	289	0.8179	16.8826	325	0.8543	19.6862	217	0.8498	13.2902	20	0.2014	1.2466	20	0.2028	1.31816	20	0.2086	1.34646
ENSRNOG00000012751	Tm9sf2	2773	129	0.6931	13.0171	245	0.9023	22.5854	159	0.8727	15.5896	301	0.947	26.7187	192	0.9232	19.3336	227	0.9156	20.6823	217	0.85	19.4788	244	0.9603	22.7107	191	0.9088	17.9749	200	0.881	19.1553	220	0.8911	22.2804	209	0.947	21.6208
ENSRNOG00000010479	Mycbp2	14485	129	0.3074	2.49199	184	0.4124	3.24722	108	0.2953	2.02718	191	0.4495	3.24573	173	0.4189	3.33495	147	0.3482	2.56403	184	0.4075	3.16192	191	0.4469	3.40334	140	0.3657	2.52228	169	0.4188	3.09868	206	0.4565	3.99391	147	0.3356	2.91122
ENSRNOG00000005183	Rtf1	4495	129	0.608	8.03036	194	0.7326	11.0328	143	0.6425	8.64954	198	0.794	10.8426	134	0.6242	8.3241	162	0.7175	9.1056	188	0.7148	10.4107	157	0.7346	9.01489	165	0.7095	9.57938	183	0.7858	10.8126	192	0.7348	11.9956	140	0.6527	8.93458
ENSRNOG00000001420	FIS1	827	129	0.4401	43.6475	164	0.4389	50.6933	166	0.5018	54.5744	127	0.3628	37.8004	125	0.4982	42.2053	189	0.3809	57.7404	117	0.4595	35.2154	136	0.4667	42.4447	203	0.5852	64.058	131	0.3724	42.0702	175	0.4353	59.4267	156	0.4232	54.1122
ENSRNOG00000011952	Samm50	1610	129	0.9155	22.4202	353	0.987	56.0481	359	0.9839	60.6255	350	0.9789	53.5107	278	0.982	48.2149	425	0.9894	66.694	324	0.9857	50.0923	335	0.9894	53.7043	423	0.9925	68.5642	271	0.9919	44.7046	393	0.9876	68.5513	348	0.995	62.0054
ENSRNOG00000014616	Iars	4494	129	0.6224	8.03215	302	0.9068	17.1785	183	0.7463	11.0715	327	0.939	17.9107	286	0.8981	17.7703	248	0.8006	13.9425	280	0.8841	15.5088	329	0.9141	18.8953	262	0.9008	15.2143	299	0.9134	17.6704	334	0.929	20.8719	245	0.8801	15.639
ENSRNOG00000001455	Kif13a	6733	129	0.4925	5.36113	223	0.7796	8.46659	108	0.5115	4.36116	261	0.7699	9.54179	197	0.6792	8.16996	165	0.6003	6.19154	214	0.6866	7.91147	198	0.681	7.59009	167	0.6416	6.47278	184	0.6752	7.25802	203	0.7337	8.46714	153	0.641	6.51867
ENSRNOG00000010473	Cand2	4423	129	0.6548	8.16109	169	0.7551	9.76747	118	0.6387	7.25357	201	0.8146	11.1861	170	0.7423	10.7323	158	0.6871	9.02534	197	0.7572	11.0867	187	0.7219	10.9123	162	0.7554	9.55831	149	0.7364	8.94702	167	0.7475	10.6035	158	0.7518	10.2475
ENSRNOG00000017352	Ctdnep1	1503	129	0.8057	24.0163	145	0.8563	24.6616	149	0.9222	26.9534	32	0.5017	5.2407	32	0.5256	5.94502	32	0.5156	5.37916	153	0.8789	25.3387	146	0.9115	25.0717	166	0.9448	28.8225	121	0.8543	21.3814	122	0.8383	22.7956	139	0.9188	26.5297
ENSRNOG00000008994	Arpc4	1422	129	0.7187	25.3843	140	0.8727	25.1675	136	0.9128	26.0031	151	0.9332	26.1382	114	0.962	22.3855	170	0.9508	30.2046	134	0.9255	23.4562	147	0.9522	26.6814	126	0.948	23.1235	106	0.917	19.7977	140	0.9374	27.6489	136	0.917	27.4357
ENSRNOG00000047931	Tmsb4x	606	129	0.8746	59.5652	210	0.9208	88.5847	304	0.9736	136.392	165	0.9208	67.0208	143	0.9653	65.8909	341	0.9736	142.169	155	0.9686	63.6665	129	0.9175	54.9424	277	0.9604	119.286	167	0.9208	73.1902	192	0.9686	88.977	272	0.9488	128.757
ENSRNOG00000030314	Golgb1	10173	129	0.4526	3.54826	182	0.5748	4.57335	161	0.4785	4.30292	225	0.615	5.44417	194	0.5899	5.32494	169	0.5467	4.19721	213	0.5958	5.21174	205	0.6183	5.2011	175	0.5559	4.48923	224	0.6314	5.84801	229	0.6254	6.32173	176	0.5345	4.96295
ENSRNOG00000019772	Dnpep	1647	129	0.9059	21.9165	270	0.9684	41.9066	260	0.929	42.9206	262	0.9447	39.1567	221	0.9472	37.468	272	0.969	41.7252	41	0.6236	6.19644	41	0.6685	6.42511	41	0.6527	6.49641	211	0.9314	34.025	272	0.9757	46.3793	217	0.9769	37.7957
ENSRNOG00000003084	Parp1	3535	129	0.6639	10.2112	225	0.8772	16.2707	148	0.8107	11.3831	215	0.8846	14.9709	186	0.8396	14.6922	203	0.8885	14.5088	195	0.854	13.7308	220	0.9222	16.0629	200	0.9035	14.7647	162	0.8634	12.1712	234	0.9171	18.5898	176	0.8897	14.2823
ENSRNOG00000015575	Rab11fip5	3510	129	0.633	10.2839	86	0.6185	6.2633	58	0.4311	4.4927	152	0.7755	10.6594	113	0.7305	8.98946	91	0.6655	6.55025	101	0.5846	7.16253	99	0.6228	7.27978	109	0.6402	8.10406	124	0.6647	9.38261	114	0.6684	9.1211	61	0.4895	4.98538
ENSRNOG00000001135	Wsb2	1511	128	0.8941	23.704	208	0.9696	35.1893	191	0.9358	34.3681	282	0.9735	45.9391	173	0.9285	31.9701	208	0.9583	34.7794	199	0.9239	32.7824	251	0.9662	42.8745	270	0.9338	46.6318	177	0.9749	31.1113	269	0.9709	49.9962	198	0.9563	37.5904
ENSRNOG00000029592	Srsf11	2624	128	0.588	13.6496	235	0.8731	22.8937	162	0.8739	16.7856	233	0.8708	21.857	197	0.8373	20.9635	193	0.899	18.583	197	0.8662	18.6876	215	0.8647	21.1478	176	0.8369	17.5038	206	0.8899	20.8503	276	0.9234	29.5389	207	0.8258	22.6299
ENSRNOG00000010945	Ywhab	2691	128	0.5935	13.3098	207	0.8569	19.6639	174	0.8082	17.5801	193	0.8636	17.6539	191	0.7926	19.819	215	0.8387	20.1859	180	0.8135	16.6499	186	0.854	17.8398	178	0.8681	17.2619	166	0.8465	16.3834	215	0.8146	22.4375	174	0.848	18.5486
ENSRNOG00000015382	Arid5a	2427	128	0.7272	14.7576	116	0.8377	12.218	64	0.7598	7.16963	123	0.8785	12.4748	91	0.7408	10.4697	69	0.6864	7.18295	112	0.8232	11.4868	95	0.7985	10.1029	57	0.5946	6.12898	89	0.7491	9.73933	88	0.7668	10.1827	74	0.7058	8.74657
ENSRNOG00000033556	Spen	10815	128	0.3759	3.31176	84	0.3102	1.98548	62	0.2215	1.55866	105	0.3892	2.3898	64	0.2493	1.6524	62	0.2305	1.4484	86	0.3135	1.97936	83	0.2968	1.98081	76	0.2875	1.83388	82	0.2971	2.01371	90	0.3274	2.33704	70	0.2744	1.85672
ENSRNOG00000019106	Rps17	465	128	0.2774	77.0251	178	0.3097	97.8541	243	0.3161	142.082	182	0.3161	96.3422	150	0.3097	90.0742	325	0.3118	176.585	198	0.3161	105.99	168	0.3118	93.2495	289	0.3183	162.191	156	0.3183	89.1006	173	0.3097	104.482	234	0.3161	144.357
ENSRNOG00000047247	Ptprs	6484	128	0.4863	5.52385	167	0.6274	6.58394	114	0.5291	4.78023	240	0.7486	9.11101	165	0.5933	7.10564	156	0.578	6.07862	176	0.6533	6.7565	192	0.645	7.64273	171	0.661	6.88234	176	0.6428	7.20906	190	0.6291	8.22924	158	0.5935	6.99021
ENSRNOG00000007998	Ssb	1640	128	0.5768	21.8394	218	0.6707	33.9801	146	0.6171	24.2045	112	0.5665	16.8102	114	0.597	19.4099	92	0.6811	14.1732	183	0.678	27.7753	213	0.6683	33.5217	164	0.714	26.0965	165	0.6494	26.7208	218	0.6726	37.3303	121	0.6305	21.165
ENSRNOG00000013442	Ciz1	2503	128	0.7235	14.3095	131	0.8426	13.379	90	0.7675	9.77616	136	0.8821	13.3745	93	0.7319	10.3749	113	0.8342	11.4062	103	0.7719	10.243	127	0.8286	13.0958	136	0.8342	14.1795	102	0.8338	10.823	106	0.7651	11.8931	101	0.8298	11.5754
ENSRNOG00000004556	Dcaf5	5497	128	0.5649	6.51568	162	0.7124	7.53358	114	0.5392	5.63853	197	0.775	8.82142	140	0.652	7.11155	148	0.6565	6.80236	168	0.7051	7.60739	172	0.7242	8.07594	171	0.7151	8.11808	178	0.7531	8.60009	183	0.7	9.3492	135	0.6469	7.04505
ENSRNOG00000014690	Pigt	2141	127	0.7665	16.5982	122	0.7763	14.5665	80	0.7001	10.1592	137	0.9033	15.7508	117	0.8267	15.2592	111	0.8342	13.0987	122	0.8146	14.1839	137	0.815	16.5156	101	0.8132	12.3108	109	0.8921	13.5213	139	0.8487	18.2325	111	0.7851	14.8724
ENSRNOG00000009275	Kpnb1	2992	127	0.7724	11.8773	254	0.9485	21.7012	187	0.8536	16.9929	335	0.9826	27.5601	224	0.8941	20.9049	214	0.9265	18.0707	256	0.9753	21.2976	272	0.9572	23.4638	281	0.9392	24.5091	278	0.9435	24.677	271	0.9459	25.4365	178	0.9131	17.0661
ENSRNOG00000033433	Csrnp1	2872	127	0.6494	12.3736	163	0.8287	14.5083	114	0.7375	10.7921	198	0.8635	16.9699	145	0.82	14.0976	149	0.8357	13.1077	193	0.8499	16.7273	176	0.8942	15.8168	132	0.8273	11.9942	201	0.8677	18.5875	180	0.8795	17.601	134	0.7911	13.3843
ENSRNOG00000019105	Dpp8	6621	127	0.4723	5.36729	166	0.6115	6.40909	106	0.5114	4.3528	218	0.7377	8.10459	164	0.6369	6.91644	187	0.6877	7.13578	176	0.6818	6.6167	181	0.6769	7.05578	153	0.6417	6.03047	199	0.6769	7.98249	193	0.6892	8.18621	144	0.6389	6.239
ENSRNOG00000001717	Opa1	3612	127	0.7832	9.83855	307	0.8987	21.7272	229	0.8516	17.2375	385	0.9186	26.2368	304	0.8812	23.5011	276	0.8654	19.3057	294	0.9061	20.2606	296	0.9111	21.1512	267	0.8973	19.2906	300	0.9239	22.0588	327	0.9266	25.4243	266	0.8666	21.1256
ENSRNOG00000034241	Set	1519	127	0.5616	23.3949	282	0.6781	47.4573	232	0.686	41.5257	289	0.6366	46.8315	257	0.634	47.243	292	0.6603	48.5678	259	0.6787	42.4418	323	0.6669	54.8826	313	0.6847	53.7737	115	0.6274	20.1071	111	0.5583	20.5218	103	0.5833	19.4516
ENSRNOG00000015117	Lrrc39	2875	127	0.5325	12.3606	265	0.625	23.5624	243	0.6007	22.9803	250	0.6056	21.4043	200	0.6202	19.4247	262	0.625	23.0243	216	0.6445	18.7011	256	0.647	22.9822	218	0.5722	19.788	204	0.5843	18.8452	272	0.6508	26.5693	199	0.6021	19.856
ENSRNOG00000025025	Dnttip2	2286	127	0.853	15.5454	233	0.9514	26.055	169	0.9392	20.1	225	0.9633	24.2273	189	0.9291	23.0859	188	0.9501	20.7781	186	0.8955	20.253	204	0.9221	23.0327	182	0.9576	20.7768	208	0.9296	24.1655	214	0.9344	26.2898	185	0.9453	23.2151
ENSRNOG00000020417	Gsk3a	1498	127	0.7316	23.7229	127	0.8111	21.6723	130	0.7951	23.5949	185	0.7817	30.3989	111	0.7844	20.6906	127	0.7457	21.4198	146	0.7724	24.2601	137	0.8218	23.6047	147	0.8945	25.6088	109	0.7343	19.3252	122	0.7697	22.8716	120	0.8064	22.9798
ENSRNOG00000039630	Wapal	3597	126	0.6761	9.80179	237	0.9149	16.843	153	0.8407	11.5648	272	0.9455	18.6134	179	0.8627	13.8955	187	0.8679	13.1348	232	0.9291	16.0546	233	0.9491	16.7188	192	0.8999	13.9298	241	0.9461	17.7945	239	0.9388	18.6598	162	0.8488	12.9196
ENSRNOG00000038212	Socs6	1605	126	0.9022	21.967	180	0.9826	28.6688	139	0.9389	23.5465	263	0.9907	40.3347	172	0.9389	29.9237	169	0.9202	26.6033	206	0.9439	31.9481	191	0.9583	30.7149	158	0.9626	25.6901	186	0.9713	30.7785	182	0.9645	31.8453	136	0.8374	24.3075
ENSRNOG00000019553	Ipo4	3717	126	0.6745	9.48535	197	0.8585	13.5483	166	0.834	12.1423	241	0.887	15.9596	182	0.8343	13.6723	193	0.8189	13.1186	223	0.9064	14.9336	199	0.8367	13.8182	239	0.887	16.7799	197	0.8649	14.0761	229	0.8943	17.3018	168	0.8415	12.9656
ENSRNOG00000011058	Utrn	10705	126	0.3862	3.29351	167	0.4629	3.98788	129	0.3983	3.27634	213	0.5339	4.89769	175	0.511	4.56471	165	0.4883	3.89422	174	0.4933	4.0459	188	0.5217	4.53275	180	0.5372	4.38802	184	0.5357	4.56499	204	0.5536	5.35171	150	0.4743	4.01958
ENSRNOG00000022922	Slc25a12	2028	126	0.785	17.3851	219	0.9107	27.605	137	0.8915	18.367	53	0.7194	6.43289	53	0.7032	7.29743	53	0.6425	6.60285	257	0.9408	31.544	231	0.928	29.3991	188	0.8807	24.1921	193	0.9093	25.2754	225	0.9354	31.1576	181	0.9186	25.6027
ENSRNOG00000031827	Arih2	3749	126	0.586	9.40438	186	0.8087	12.6826	132	0.7477	9.57293	218	0.825	14.3133	180	0.7757	13.4066	155	0.7807	10.4458	189	0.8237	12.5487	191	0.8221	13.1495	172	0.7722	11.9728	181	0.8165	12.8225	190	0.7506	14.2327	136	0.6893	10.4064
ENSRNOG00000003334	Klhl21	3830	126	0.6846	9.20549	261	0.8593	17.4202	183	0.8047	12.9909	328	0.9386	21.0801	232	0.8491	16.9142	212	0.8368	13.9849	264	0.9091	17.1576	250	0.9094	16.8473	181	0.8436	12.3328	257	0.929	17.8215	276	0.8896	20.2376	198	0.848	14.83
ENSRNOG00000019812	Nr1h2	1938	126	0.7415	18.1925	145	0.9401	19.1261	156	0.9061	21.8855	165	0.9174	20.957	107	0.9185	15.4167	169	0.9505	22.0321	139	0.9236	17.8531	160	0.9448	21.3087	169	0.9613	22.757	119	0.8535	16.3081	141	0.8932	20.4322	144	0.9412	21.315
ENSRNOG00000006001	Luc7l2	2647	126	0.6286	13.3196	182	0.8304	17.5764	155	0.8591	15.9208	193	0.8553	17.9474	173	0.813	18.2496	166	0.7866	15.8445	183	0.8682	17.2088	186	0.8417	18.1363	148	0.7658	14.5912	184	0.9018	18.4617	211	0.9324	22.3861	131	0.85	14.1969
ENSRNOG00000014030	Synm	4809	126	0.6473	7.33147	180	0.765	9.56819	106	0.5831	5.99291	278	0.828	14.2295	195	0.8291	11.3225	145	0.666	7.61792	194	0.7299	10.0415	222	0.8058	11.9148	167	0.7008	9.06243	218	0.7582	12.0396	256	0.8235	14.9498	112	0.581	6.68097
ENSRNOG00000000923	Cct6a	2199	126	0.7813	16.0332	340	0.9604	39.5244	259	0.9432	32.0229	380	0.9509	42.536	323	0.9791	41.0147	345	0.9714	39.6385	314	0.9654	35.5432	349	0.9727	40.9629	312	0.9873	37.0265	332	0.9718	40.0979	351	0.9832	44.8261	260	0.9818	33.9175
ENSRNOG00000010284	St3gal5	2698	126	0.7687	13.0678	195	0.8343	18.4759	170	0.821	17.1314	183	0.8529	16.6958	194	0.8284	20.0781	182	0.8013	17.0433	175	0.7906	16.1454	180	0.8106	17.2195	240	0.8936	23.2141	193	0.834	18.9987	221	0.8621	23.0038	183	0.8277	19.4574
ENSRNOG00000047134	Gtf2f1	1675	126	0.9266	21.049	148	0.9433	22.587	122	0.969	19.803	122	0.957	17.9285	137	0.9696	22.8385	139	0.9582	20.9664	168	0.9946	24.9659	144	0.9934	22.189	133	0.9493	20.7214	142	0.9851	22.5155	161	0.957	26.9936	117	0.9588	20.0377
ENSRNOG00000003228	Mid1ip1	1899	126	0.7467	18.5661	162	0.9563	21.8073	130	0.8615	18.6125	187	0.9647	24.239	126	0.872	18.5271	158	0.9458	21.0211	198	0.9121	25.9533	167	0.881	22.6977	148	0.921	20.3385	194	0.9252	27.1322	191	0.9816	28.246	144	0.9605	21.7527
ENSRNOG00000016509	Usp10	3258	125	0.6731	10.7358	179	0.8852	14.0448	119	0.7762	9.93076	158	0.864	11.9372	96	0.721	8.22777	109	0.7545	8.45277	213	0.9156	16.2735	182	0.9036	14.4182	163	0.8616	13.0563	18	0.2087	1.46734	18	0.2247	1.55157	18	0.2158	1.58488
ENSRNOG00000009001	Mtss1	4682	125	0.5337	7.47057	168	0.7367	9.17255	87	0.5643	5.05213	198	0.7781	10.4096	158	0.7238	9.42297	104	0.6311	5.6121	172	0.7488	9.14427	183	0.7922	10.0881	118	0.6121	6.57709	153	0.7006	8.67899	175	0.7091	10.4968	114	0.6177	6.98473
ENSRNOG00000019097	Bap1	3751	125	0.5977	9.32477	217	0.8579	14.7885	176	0.8043	12.7571	261	0.8414	17.1274	203	0.839	15.1116	199	0.7921	13.4038	237	0.8678	15.7273	206	0.8376	14.1746	247	0.8864	17.1843	224	0.8568	15.8602	231	0.8675	17.2947	172	0.7987	13.154
ENSRNOG00000016930	Ube2s	946	125	0.8636	36.9738	168	0.9218	45.3973	161	0.8869	46.2723	162	0.9228	42.1524	138	0.8805	40.7333	176	0.9133	47.0051	163	0.944	42.8893	159	0.9281	43.3807	192	0.9165	52.9655	122	0.8837	34.2513	177	0.8837	52.545	156	0.9588	47.3053
ENSRNOG00000018825	DCAF11	2590	125	0.7861	13.5047	315	0.9761	31.0902	264	0.9726	27.7135	359	0.9703	34.1187	250	0.9556	26.9527	297	0.9683	28.9721	270	0.9587	25.9487	297	0.9571	29.597	285	0.9927	28.7163	266	0.9452	27.2766	331	0.9907	35.8903	282	0.9467	31.2338
ENSRNOG00000006378	Mga	9135	125	0.4498	3.82892	134	0.4777	3.7498	90	0.3283	2.67868	187	0.5521	5.03885	134	0.5007	4.09598	114	0.4154	3.15297	135	0.4924	3.67856	180	0.5433	5.08574	131	0.4935	3.74236	157	0.5229	4.56457	153	0.5299	4.70362	94	0.3652	2.95186
ENSRNOG00000034233	Fyttd1	3505	125	0.5889	9.97923	400	0.9643	29.1732	267	0.9427	20.7114	465	0.986	32.656	397	0.9792	31.6275	374	0.9726	26.9592	417	0.9364	29.6142	414	0.9504	30.4862	357	0.9578	26.5805	406	0.9563	30.7643	417	0.9575	33.4116	279	0.9341	22.8345
ENSRNOG00000021638	Eef1d	2016	125	0.5709	17.3498	309	0.5675	39.1814	267	0.568	36.0087	271	0.5982	33.0885	242	0.5432	33.5187	338	0.5035	42.3594	248	0.562	30.6206	296	0.5382	37.8958	287	0.6012	37.1513	260	0.5327	34.2525	323	0.6091	44.9947	232	0.5481	33.0121
ENSRNOG00000018569	Ahcyl1	3300	125	0.65	10.5992	203	0.8903	15.7251	175	0.8494	14.4182	36	0.3882	2.68526	36	0.4409	3.04615	36	0.4155	2.75621	199	0.8803	15.0104	200	0.867	15.6425	169	0.873	13.3646	198	0.8773	15.9353	195	0.8639	16.5947	160	0.8261	13.9086
ENSRNOG00000016619	Use1	839	125	0.8784	41.6892	189	0.9952	57.5853	226	0.9976	73.2374	173	0.9821	50.7554	147	0.9809	48.9235	201	0.9893	60.5282	147	0.9833	43.6122	131	0.9821	40.2995	189	0.9893	58.7872	141	0.9881	44.634	183	0.9905	61.2546	155	0.9917	52.9963
ENSRNOG00000018417	Naa35	2537	125	0.7647	13.7868	247	0.9543	24.8879	176	0.8766	18.8616	284	0.9452	27.5547	193	0.8814	21.2422	218	0.9373	21.71	222	0.8979	21.7813	222	0.9314	22.5851	205	0.9145	21.0871	228	0.9669	23.8684	245	0.9551	27.1203	172	0.9283	19.4484
ENSRNOG00000023385	RPL37A	704	125	0.3906	49.6835	219	0.4673	79.5213	358	0.4048	138.26	221	0.4219	77.2712	178	0.3523	70.6008	453	0.4162	162.573	184	0.402	65.0575	195	0.5028	71.4911	384	0.3438	142.345	183	0.3537	69.0379	269	0.5057	107.307	306	0.3707	124.688
ENSRNOG00000007124	Krcc1	1615	124	0.5777	21.4845	396	0.9604	62.6808	298	0.9238	50.1684	395	0.9238	60.2036	316	0.9449	54.6357	399	0.9474	62.42	344	0.9492	53.0198	424	0.9443	67.7616	286	0.9325	46.2143	339	0.9443	55.7489	379	0.9845	65.9046	270	0.9536	47.9587
ENSRNOG00000037437	Golga3	5719	124	0.438	6.06704	198	0.6746	8.85028	134	0.5774	6.37047	235	0.7012	10.1145	172	0.6211	8.39789	161	0.6188	7.11261	162	0.6314	7.05094	185	0.6471	8.34914	156	0.6428	7.11848	184	0.627	8.54489	192	0.6952	9.42823	160	0.6034	8.02557
ENSRNOG00000011871	Pcaf	3752	124	0.6668	9.24771	188	0.8017	12.8088	150	0.826	10.8696	247	0.9099	16.2044	192	0.9046	14.289	156	0.8033	10.5047	209	0.778	13.8655	212	0.8742	14.5836	170	0.8329	11.8241	190	0.8398	13.4493	197	0.8268	14.7453	155	0.8084	11.8507
ENSRNOG00000020618	Rpl13a	653	124	0.6861	53.1354	440	0.6983	172.247	535	0.7029	222.755	403	0.7121	151.911	336	0.6876	143.677	581	0.706	224.795	333	0.709	126.936	422	0.7075	166.798	573	0.7044	228.994	323	0.709	131.371	406	0.6983	174.607	467	0.7029	205.154
ENSRNOG00000004337	Fam20b	5051	124	0.5334	6.86941	167	0.7488	8.45184	112	0.606	6.02875	171	0.7616	8.3333	128	0.6719	7.07611	119	0.6183	5.95241	157	0.7278	7.73703	182	0.7208	9.30003	139	0.6533	7.18159	23	0.2039	1.20937	24	0.2154	1.33439	26	0.1988	1.47663
ENSRNOG00000018881	Rnasek	588	124	0.9575	59.0092	187	0.9711	81.2974	194	0.9456	89.7038	190	0.9507	79.538	180	0.966	85.4786	215	0.9507	92.3814	206	0.9609	87.2051	169	0.949	74.1822	175	0.9745	77.6683	154	0.9677	69.5588	206	0.932	98.3873	173	0.9405	84.4004
ENSRNOG00000020862	Ptpn23	5204	124	0.5634	6.66745	127	0.6164	6.23848	100	0.5319	5.22455	161	0.7321	7.6153	141	0.6612	7.56561	132	0.652	6.40855	138	0.641	6.60076	125	0.6472	6.19959	135	0.6403	6.76986	124	0.6015	6.32839	132	0.5926	7.12338	102	0.5505	5.62262
ENSRNOG00000048405	Scamp3	1479	124	0.8242	23.46	185	0.9506	31.9754	160	0.9216	29.4129	161	0.9608	26.7951	133	0.975	25.1099	182	0.9533	31.0904	150	0.9236	25.245	144	0.9567	25.1295	152	0.9419	26.82	137	0.9419	24.6015	168	0.9162	31.9	129	0.9094	25.0206
ENSRNOG00000006612	Map2k3	2328	124	0.491	14.9044	260	0.5808	28.5498	198	0.5636	23.1243	279	0.5795	29.4998	198	0.57	23.7489	217	0.5713	23.5505	224	0.5752	23.9506	222	0.5752	24.6128	217	0.5803	24.3254	215	0.5606	24.5281	243	0.5636	29.3138	187	0.582	23.0428
ENSRNOG00000018630	Gapdh	1276	124	0.0533	27.1923	995	0.0533	199.335	1141	0.0533	243.12	1018	0.0533	196.379	961	0.0533	210.298	1193	0.0533	236.218	991	0.0533	193.319	919	0.0533	185.89	963	0.0533	196.951	892	0.0533	185.662	875	0.0533	192.578	994	0.0533	223.466
ENSRNOG00000006221	Uba3	2165	124	0.5446	16.0265	288	0.9617	34.0053	221	0.9182	27.7537	271	0.9219	30.8113	277	0.9413	35.726	254	0.9741	29.6414	255	0.9182	29.318	258	0.9469	30.7576	245	0.8868	29.5319	229	0.9321	28.0923	278	0.9885	36.0609	223	0.9072	29.5476
ENSRNOG00000003403	Slc35f5	2716	123	0.7607	12.6722	410	0.8999	38.5892	268	0.8848	26.8282	445	0.9186	40.33	349	0.891	35.8804	357	0.961	33.2095	417	0.9083	38.2172	356	0.8818	33.8307	324	0.9348	31.1314	419	0.9385	40.9726	372	0.9028	38.4647	297	0.8958	31.3691
ENSRNOG00000005923	Mtmr2	3812	123	0.5171	9.02875	181	0.6642	12.1377	169	0.6815	12.0537	244	0.7337	15.7556	210	0.6991	15.3826	197	0.7282	13.0568	213	0.7261	13.9085	219	0.6967	14.828	194	0.7109	13.281	198	0.6928	13.795	258	0.7222	19.0071	175	0.6251	13.1693
ENSRNOG00000008744	Cops2	2067	123	0.7818	16.651	247	0.9487	30.547	213	0.9279	28.0173	279	0.9211	33.2248	230	0.9415	31.0706	241	0.9192	29.4578	226	0.9173	27.2157	265	0.9313	33.0899	224	0.9192	28.2807	230	0.9289	29.5526	277	0.9187	37.6347	204	0.9134	28.3117
ENSRNOG00000008106	Shmt2	2045	123	0.779	16.8301	226	0.9883	28.2506	166	0.9452	22.0699	231	0.9892	27.8046	205	0.9535	27.9913	213	0.9643	26.3154	42	0.6303	5.1122	42	0.6103	5.30086	42	0.6611	5.35968	177	0.9487	22.9873	241	0.9804	33.0958	173	0.9682	24.2677
ENSRNOG00000000812	RGD1302996	1180	123	0.9102	29.1674	144	0.9466	31.1955	137	0.9661	31.5664	166	0.9729	34.6277	112	0.939	26.5032	127	0.9814	27.1923	179	0.9737	37.7592	133	0.9466	29.0911	185	0.9898	40.9141	127	0.9407	28.5845	108	0.9322	25.7034	150	0.9924	36.4658
ENSRNOG00000009882	PPP3CA	2641	123	0.788	13.032	217	0.8978	21.0041	150	0.8451	15.4422	239	0.9364	22.2755	177	0.8898	18.714	184	0.8364	17.6024	45	0.4896	4.24127	45	0.5233	4.39779	45	0.5422	4.44659	19	0.2885	1.91071	19	0.2658	2.02039	19	0.2764	2.06377
ENSRNOG00000029939	Gypc	2192	123	0.7888	15.7015	250	0.9475	29.1549	187	0.9133	23.1946	281	0.9754	31.5547	195	0.9526	24.8403	215	0.9562	24.7811	216	0.9297	24.5282	237	0.9302	27.906	226	0.9069	26.9061	248	0.9402	30.0483	224	0.953	28.6983	208	0.9019	27.2207
ENSRNOG00000011194	Tpp2	4551	123	0.4601	7.56264	214	0.5728	12.0204	176	0.5739	10.5146	266	0.5893	14.3871	203	0.5594	12.4552	196	0.5981	10.8811	233	0.5717	12.7439	211	0.5823	11.9665	194	0.5662	11.1244	64	0.3777	3.73493	68	0.3872	4.19615	56	0.3406	3.52986
ENSRNOG00000025792	Crk	4538	123	0.5886	7.58431	258	0.8651	14.5334	173	0.7323	10.365	302	0.8799	16.381	216	0.8149	13.2908	294	0.8689	16.3684	272	0.8396	14.9196	292	0.8596	16.6077	243	0.8546	13.9741	243	0.8537	14.2217	253	0.8603	15.6569	219	0.8281	13.8438
ENSRNOG00000007478	Cry2	3963	123	0.6538	8.68473	162	0.7906	10.4497	118	0.7086	8.09551	155	0.7451	9.62733	115	0.6823	8.10281	104	0.6334	6.63029	200	0.8251	12.562	198	0.8887	12.8953	188	0.8095	12.3799	26	0.271	1.74244	29	0.3137	2.05505	18	0.167	1.30294
ENSRNOG00000026905	Ppm1g	2160	123	0.8287	15.9341	196	0.9519	23.1961	171	0.8639	21.5243	162	0.9028	18.4612	180	0.937	23.2692	197	0.9736	23.0428	175	0.9097	20.1668	201	0.9005	24.0178	226	0.9727	27.3047	16	0.2694	1.96732	16	0.3176	2.08025	16	0.2847	2.12492
ENSRNOG00000000938	Ran	1079	123	0.8193	31.8977	401	0.9231	95.0025	319	0.9222	80.3814	379	0.9286	86.4601	315	0.9305	81.5176	393	0.9342	92.0226	314	0.9259	72.437	377	0.9509	90.18	440	0.9361	106.418	327	0.9481	80.4888	419	0.9277	109.054	327	0.9333	86.9365
ENSRNOG00000007001	Nek9	5822	122	0.5235	5.86358	270	0.7692	11.8551	151	0.6091	7.05166	348	0.8741	14.7131	244	0.7709	11.7025	234	0.7094	10.1547	260	0.7595	11.1161	281	0.8342	12.4573	256	0.7439	11.4749	207	0.7092	9.44294	288	0.8081	13.8922	218	0.735	10.7414
ENSRNOG00000014013	Map4k4	5254	122	0.5541	6.49748	205	0.7785	9.97415	142	0.6637	7.34826	215	0.7604	10.0727	168	0.6751	8.92856	190	0.7931	9.13665	234	0.8106	11.0861	239	0.7912	11.7408	195	0.7259	9.68562	11	0.0799	0.556047	11	0.0942	0.587966	11	0.083	0.600591
ENSRNOG00000049920	Psma2	3479	122	0.2196	9.81252	237	0.278	17.4143	238	0.2593	18.5998	64	0.2277	4.52818	72	0.2279	5.77883	85	0.2228	6.17288	197	0.2535	14.095	195	0.2805	14.4667	278	0.2702	20.8532	219	0.2483	16.7186	231	0.2374	18.6469	236	0.269	19.4596
ENSRNOG00000000808	Hsf2	2545	122	0.644	13.4137	252	0.9477	25.3119	176	0.8978	18.8023	259	0.9108	25.0501	208	0.9407	22.8212	207	0.8931	20.5497	234	0.9442	22.8865	226	0.9006	22.9198	191	0.8609	19.5852	268	0.9273	27.9676	248	0.9293	27.3661	174	0.8963	19.6127
ENSRNOG00000013843	Arcn1	3461	122	0.666	9.86355	327	0.9567	24.1523	236	0.9006	18.5395	332	0.9737	23.6121	252	0.9361	20.3311	299	0.9598	21.8269	298	0.9003	21.4322	292	0.9428	21.7757	304	0.9468	22.9221	288	0.9408	22.1004	295	0.9549	23.937	265	0.9356	21.9644
ENSRNOG00000011138	Rpl29	642	122	0.5156	53.1741	155	0.6231	61.7176	217	0.6106	91.8991	134	0.5467	51.3769	125	0.5467	54.3672	215	0.5545	84.611	148	0.5903	57.3824	150	0.5389	60.3041	202	0.5607	82.1106	130	0.5997	53.7796	183	0.5483	80.0507	176	0.5389	78.6418
ENSRNOG00000021637	Ddx46	3531	122	0.6539	9.66802	204	0.9295	14.7688	151	0.8145	11.6269	235	0.908	16.3821	181	0.8474	14.3134	199	0.8842	14.239	204	0.8575	14.3809	214	0.9309	15.6425	206	0.8805	15.2248	207	0.9159	15.5697	249	0.97	19.8039	148	0.7698	12.0238
ENSRNOG00000014945	Kpna3	2075	122	0.6742	16.4519	139	0.919	17.1241	106	0.8405	13.8891	180	0.9504	21.3527	141	0.9422	18.9742	100	0.8342	12.176	153	0.8988	18.3538	143	0.8655	17.7872	115	0.892	14.4631	147	0.92	18.8152	143	0.9267	19.3538	106	0.8593	14.6543
ENSRNOG00000002301	Uso1	3845	122	0.665	8.87848	261	0.8986	17.3523	206	0.844	14.5666	284	0.9017	18.1811	234	0.885	16.9935	234	0.8978	15.376	245	0.9022	15.8607	247	0.8538	16.5802	226	0.8778	15.3389	223	0.8944	15.4034	267	0.8869	19.5013	198	0.8419	14.7722
ENSRNOG00000018367	Taldo1	1219	122	0.9303	28.0047	306	0.9672	64.1697	286	0.9418	63.7894	324	0.9762	65.4244	246	0.9844	56.3499	304	0.982	63.0077	292	0.9811	59.6254	278	0.9828	58.8615	271	0.9377	58.0161	29	0.6399	6.31834	29	0.644	6.68103	29	0.6103	6.82449
ENSRNOG00000023541	Ahctf1	6723	122	0.4651	5.07776	134	0.5828	5.09511	90	0.4324	3.6397	183	0.6833	6.70018	124	0.5243	5.15016	111	0.5689	4.17141	161	0.6369	5.96094	151	0.617	5.79701	123	0.5167	4.77447	152	0.606	6.00467	152	0.6566	6.34936	113	0.5203	4.8216
ENSRNOG00000003603	Arhgap44	3791	121	0.6273	8.93114	145	0.7613	9.77747	98	0.5991	7.02844	165	0.7431	10.7134	114	0.7433	8.39679	134	0.7457	8.93047	109	0.6824	7.1569	155	0.7906	10.5528	142	0.7787	9.77502	138	0.7054	9.66795	138	0.7668	10.2229	115	0.6858	8.70202
ENSRNOG00000015182	Ppp2cb	1585	121	0.8675	21.3615	240	0.9615	38.7074	183	0.9603	31.3912	213	0.9886	33.0787	151	0.9741	26.6017	215	0.9312	34.2715	198	0.9729	31.0948	162	0.93	26.3801	188	0.9767	30.9536	192	0.9596	32.1722	218	0.9274	38.6257	173	0.9571	31.3107
ENSRNOG00000013039	Add1	3800	121	0.5513	8.90999	179	0.8011	12.0415	157	0.8008	11.2332	235	0.9326	15.2224	178	0.8479	13.0797	160	0.8239	10.638	200	0.8716	13.1008	225	0.9161	15.2823	202	0.8663	13.8724	182	0.8542	12.7203	225	0.9071	16.6283	154	0.7937	11.6255
ENSRNOG00000016180	Pdp1	2398	121	0.7452	14.1192	160	0.8937	17.0562	146	0.9008	16.5535	187	0.9091	19.1951	112	0.8624	13.0416	166	0.8924	17.4897	181	0.9345	18.788	171	0.9116	18.4051	175	0.8745	19.0446	171	0.9391	18.9389	161	0.9108	18.855	117	0.7965	13.9963
ENSRNOG00000005703	Arfgef1	5541	121	0.5631	6.11044	162	0.667	7.47376	100	0.5788	4.9068	169	0.6963	7.50752	148	0.6836	7.45823	112	0.5748	5.10685	165	0.7194	7.41222	177	0.7286	8.24471	145	0.6596	6.82909	13	0.1056	0.623109	13	0.1088	0.658877	13	0.1056	0.673025
ENSRNOG00000020892	Dpf2	2404	121	0.8332	14.084	215	0.953	22.8621	153	0.9285	17.3039	191	0.9268	19.5568	162	0.9293	18.8167	148	0.9064	15.5543	202	0.9143	20.9155	180	0.9447	19.3254	158	0.8918	17.1516	177	0.8939	19.5545	199	0.8873	23.2471	161	0.8802	19.2118
ENSRNOG00000010216	Vwa8	5103	121	0.5332	6.63491	220	0.7856	11.0207	130	0.5828	6.92635	213	0.7364	10.2743	191	0.6737	10.4513	164	0.7247	8.11973	210	0.6992	10.2434	177	0.7396	8.95237	181	0.6912	9.25627	168	0.6716	8.74365	212	0.7447	11.667	164	0.6682	9.21922
ENSRNOG00000015976	Snurf	1333	121	0.6279	25.3998	265	0.814	50.8192	191	0.7937	38.9574	214	0.8245	39.5168	160	0.7884	33.516	188	0.8185	35.6329	193	0.8177	36.0396	214	0.8222	41.4356	189	0.7907	37.0011	171	0.7727	34.0702	241	0.8275	50.7734	178	0.7667	38.3059
ENSRNOG00000018378	Cacnb2	3894	121	0.6207	8.6949	195	0.812	12.8012	162	0.7201	11.3111	265	0.7912	16.7513	196	0.7907	14.0547	167	0.7594	10.8354	204	0.8007	13.0403	193	0.7632	12.7924	189	0.8577	12.6663	187	0.7578	12.7542	227	0.7984	16.3711	160	0.6882	11.7869
ENSRNOG00000029726	Gstm1	1236	121	0.8155	27.3932	159	0.873	32.8845	142	0.7799	31.2361	165	0.8503	32.8597	136	0.8325	30.7243	133	0.8552	27.1867	154	0.8196	31.0138	151	0.8422	31.5318	103	0.7799	21.7471	22	0.5688	4.7273	22	0.4563	4.99866	22	0.4984	5.10599
ENSRNOG00000021198	Hist1h2bq	949	121	0.8209	35.6775	251	0.882	67.6114	162	0.8419	46.4125	275	0.8704	71.3288	199	0.8662	58.553	229	0.8841	60.9667	216	0.8567	56.6552	213	0.9136	57.93	179	0.8504	49.2232	223	0.8988	62.4091	217	0.8714	64.2159	157	0.8145	47.458
ENSRNOG00000017243	Bnip3	1618	121	0.6323	20.9258	457	0.7991	72.2021	461	0.796	77.4656	456	0.7973	69.372	366	0.7911	63.1633	498	0.7973	77.7632	382	0.793	58.7675	407	0.8004	64.9241	452	0.7942	72.9026	418	0.7923	68.613	420	0.7843	72.8987	394	0.7905	69.8544
ENSRNOG00000007325	Usp28	4183	120	0.6543	8.02728	187	0.8138	11.4279	148	0.7406	9.61967	254	0.89	14.9467	167	0.7695	11.1478	172	0.7636	10.3888	218	0.8288	12.9724	220	0.8573	13.5745	202	0.8205	12.6022	16	0.1642	1.01588	16	0.1645	1.07419	16	0.1575	1.09726
ENSRNOG00000001633	Tfg	1897	120	0.6152	17.7006	154	0.9167	20.7523	120	0.8745	17.1989	172	0.9373	22.3182	137	0.8882	20.1658	140	0.8603	18.6459	130	0.8861	17.058	142	0.8846	19.3202	126	0.9083	17.3335	145	0.8835	20.3006	123	0.8635	18.209	126	0.8666	19.0537
ENSRNOG00000010861	Atad1	2300	120	0.687	14.5992	192	0.8939	21.3396	141	0.8752	16.6678	214	0.9383	22.9026	182	0.8926	22.0956	171	0.8878	18.7842	179	0.9091	19.3721	165	0.863	18.516	167	0.8557	18.9484	191	0.9513	22.0554	191	0.8922	23.3214	165	0.8639	20.5794
ENSRNOG00000012709	Bag2	1419	120	0.8217	23.6632	104	0.8541	18.7354	104	0.8386	19.9268	121	0.8337	20.9895	86	0.8689	16.923	119	0.919	21.1879	26	0.5215	4.56082	26	0.506	4.72913	26	0.5455	4.78161	7	0.1811	1.31016	7	0.2382	1.38537	7	0.2114	1.41511
ENSRNOG00000031312	Tnfrsf1a	2115	120	0.7579	15.8762	107	0.8255	12.9326	132	0.9437	16.9688	166	0.9362	19.3195	123	0.8284	16.2389	147	0.9395	17.5602	152	0.9158	17.889	138	0.9035	16.8407	136	0.9139	16.7808	151	0.9305	18.9616	129	0.8709	17.1289	119	0.8941	16.1403
ENSRNOG00000002871	Rbm25	1392	120	0.9131	24.1222	172	0.9497	31.5865	120	0.9267	23.4384	166	0.9483	29.354	150	0.9296	30.0894	136	0.9483	24.6844	169	0.9418	30.2204	174	0.9533	32.2627	131	0.9023	24.5592	192	0.9626	36.6329	217	0.949	43.7794	125	0.9052	25.7601
ENSRNOG00000003679	Med13	7024	120	0.3971	4.78049	123	0.5007	4.47644	89	0.4354	3.44502	199	0.6579	6.97376	134	0.5716	5.327	109	0.4853	3.92072	153	0.5625	5.422	138	0.5769	5.0709	120	0.5121	4.45841	159	0.6058	6.01204	134	0.5564	5.35759	106	0.5178	4.3291
ENSRNOG00000017405	Raly	1015	120	0.8315	33.0819	252	0.9911	63.4668	172	0.9714	46.0733	257	0.9852	62.3254	200	0.9665	55.0207	218	0.9842	54.2643	243	0.9842	59.5926	212	0.9872	53.9089	222	0.9901	57.0782	198	0.9833	51.8093	228	0.9901	63.0838	184	0.9892	52.0029
ENSRNOG00000016227	Glrx3	1222	120	0.8552	27.478	223	0.9828	46.6494	193	0.9902	42.941	199	0.9795	40.0848	187	0.9926	42.73	245	0.9869	50.6545	197	0.9918	40.128	209	0.955	44.1434	222	0.9853	47.4094	173	0.9607	37.5997	218	0.9967	50.0996	193	0.9967	45.3067
ENSRNOG00000021758	Tnpo3	4158	120	0.5507	8.07555	168	0.7352	10.3285	141	0.7121	9.21979	187	0.8134	11.0702	138	0.734	9.26737	123	0.6809	7.47384	160	0.7655	9.57828	171	0.8343	10.6146	117	0.6585	7.34318	166	0.7249	10.6031	203	0.7489	13.7107	144	0.6941	9.93468
ENSRNOG00000016833	Ide	4276	120	0.6183	7.8527	164	0.7516	9.80434	147	0.7168	9.34687	159	0.7631	9.15288	111	0.6742	7.24849	88	0.6066	5.19958	184	0.7675	10.7111	218	0.844	13.1586	160	0.7725	9.76484	16	0.1824	0.993782	16	0.1555	1.05083	16	0.1399	1.07339
ENSRNOG00000020941	Psenen	532	119	0.9868	62.5908	173	0.985	83.1279	178	0.985	90.9693	35	0.8139	16.194	32	0.8346	16.7958	37	0.9624	17.5717	155	0.985	72.5224	147	0.9812	71.3175	157	0.985	77.0142	148	0.9906	73.8855	194	0.985	102.409	153	0.9812	82.5003
ENSRNOG00000014285	Ssh2	6343	119	0.5784	5.24962	153	0.6795	6.16608	87	0.4728	3.72916	176	0.7167	6.82993	150	0.6517	6.60326	108	0.5321	4.30182	151	0.6246	5.92563	172	0.7203	6.99881	143	0.6336	5.88335	173	0.6915	7.2437	168	0.6866	7.43813	121	0.5756	5.47226
ENSRNOG00000023373	Sec24b	5001	119	0.5503	6.65833	150	0.6895	7.66737	83	0.4823	4.5124	171	0.7319	8.41661	133	0.6261	7.42603	120	0.5865	6.06245	129	0.6111	6.42074	152	0.6549	7.84471	123	0.6175	6.41847	148	0.6495	7.85984	116	0.6269	6.51404	99	0.5441	5.67877
ENSRNOG00000008870	Atf7ip	3909	119	0.6227	8.51837	114	0.7142	7.45506	83	0.5664	5.77297	174	0.8104	10.9568	120	0.6812	8.57191	101	0.6444	6.52798	148	0.6992	9.42428	151	0.8017	9.97015	124	0.661	8.27826	124	0.738	8.4249	150	0.7754	10.7764	107	0.6795	7.85225
ENSRNOG00000012434	Zfp598	3275	119	0.6296	10.1674	120	0.7701	9.3666	127	0.8058	10.5434	174	0.8452	13.0778	125	0.7395	10.6576	141	0.7744	10.8776	132	0.7554	10.0326	127	0.7548	10.0088	138	0.8214	10.9964	121	0.7713	9.81258	125	0.7817	10.7188	111	0.7377	9.72272
ENSRNOG00000000701	Iscu	924	119	0.9297	36.0371	355	0.9729	98.2129	284	0.9481	83.5666	318	0.9784	84.7136	273	0.987	82.4998	287	0.9665	78.4754	255	0.9632	68.6943	304	0.9643	84.9165	280	0.9654	79.0804	290	0.9751	83.3556	393	0.9686	119.446	248	0.9654	76.9938
ENSRNOG00000009525	Rnf114	2139	119	0.6489	15.5672	178	0.9322	21.2726	136	0.9392	17.2868	164	0.9116	18.8726	130	0.7957	16.9705	139	0.9196	16.4183	131	0.9187	15.2445	155	0.842	18.703	148	0.9079	18.0565	148	0.9182	18.3764	144	0.8855	18.9061	111	0.8266	14.8863
ENSRNOG00000021042	Psmd4	1271	119	0.9961	26.1985	296	0.989	59.5331	283	0.9693	60.5379	264	0.9835	51.1277	250	0.9835	54.9233	313	0.9835	62.2189	252	0.9662	49.3523	302	0.9764	61.327	307	0.9764	63.0341	25	0.6294	5.224	25	0.6349	5.52387	25	0.6286	5.64249
ENSRNOG00000019578	Rps16	819	119	0.6386	40.6573	382	0.6813	119.232	453	0.7753	150.384	317	0.7375	95.2738	270	0.6508	92.0538	559	0.6947	172.445	299	0.6239	90.874	307	0.6618	96.7486	492	0.7375	156.77	277	0.7399	89.8266	332	0.5897	113.842	412	0.6532	144.308
ENSRNOG00000010298	XBP1	1821	119	0.788	18.2857	228	0.9885	32.0064	200	0.9698	29.8612	219	0.9802	29.6028	199	0.9445	30.5144	200	0.9835	27.7488	200	0.9627	27.3383	240	0.9681	34.0167	211	0.9572	30.2382	190	0.9671	27.711	270	0.9709	41.6393	206	0.9566	32.4514
ENSRNOG00000003223	Degs1	1437	119	0.8553	23.1721	157	0.92	27.929	139	0.9109	26.2993	134	0.9311	22.9534	130	0.9207	25.2609	134	0.9137	23.5598	31	0.6583	5.36979	31	0.6131	5.56795	31	0.62	5.62973	139	0.8998	25.6902	146	0.9471	28.5329	125	0.9346	24.9534
ENSRNOG00000016166	Pdlim1	1408	119	0.8111	23.6494	143	0.9311	25.9624	159	0.9219	30.703	143	0.902	24.9995	101	0.8871	20.03	195	0.9822	34.9909	135	0.9141	23.8662	146	0.946	26.7634	171	0.9702	31.694	109	0.9482	20.5605	157	0.9737	31.3146	157	0.9148	31.987
ENSRNOG00000002823	Mapk9	2623	119	0.7514	12.6947	134	0.8467	13.0593	92	0.7469	9.53622	155	0.8822	14.5456	98	0.8063	10.4325	100	0.793	9.63219	124	0.8616	11.7673	132	0.8647	12.9887	118	0.8673	11.74	129	0.8734	13.0617	136	0.8006	14.561	112	0.8483	12.2489
ENSRNOG00000002642	Ptges3	1659	119	0.8252	20.0713	388	0.9892	59.7857	304	0.9825	49.8211	385	0.9855	57.1232	349	0.9813	58.741	393	0.9861	59.8508	87	0.8758	13.0534	80	0.8626	12.4461	92	0.8282	14.4719	32	0.5473	5.12286	42	0.5895	7.10971	39	0.5359	6.74364
ENSRNOG00000003583	Smyd2	1575	119	0.8673	21.1418	252	0.9613	40.9008	239	0.9752	41.2576	281	0.9797	43.9161	213	0.9676	37.7625	340	0.9784	54.5408	227	0.9695	35.8755	241	0.9892	39.4936	336	0.9797	55.6726	204	0.9359	34.4	259	0.9784	46.1815	246	0.9797	44.8054
ENSRNOG00000011020	Eif3l	1309	119	0.8976	25.438	212	0.9641	41.4008	188	0.9656	39.0485	191	0.9542	35.9163	158	0.9305	33.7039	218	0.974	42.0766	199	0.9251	37.8413	189	0.9557	37.266	188	0.9312	37.4801	202	0.9595	40.9846	205	0.9351	43.9808	171	0.9412	37.4742
ENSRNOG00000049219	Rnf187	1891	119	0.8144	17.6088	218	0.9709	29.4698	173	0.9471	24.8737	227	0.9535	29.5483	179	0.9175	26.4316	186	0.9714	24.8511	193	0.9662	25.4049	207	0.9783	28.2533	222	0.9741	30.6369	151	0.8964	21.2077	213	0.964	31.6328	162	0.9133	24.5753
ENSRNOG00000012383	Ndufc2	605	119	0.9273	55.0385	311	0.9603	131.407	313	0.9421	140.662	236	0.962	96.0185	236	0.9438	108.923	352	0.957	146.998	210	0.9719	86.4005	257	0.9719	109.64	312	0.9289	134.581	219	0.9587	96.1386	289	0.9917	134.15	280	0.9388	132.763
ENSRNOG00000014445	Hp1bp3	3044	119	0.6896	10.939	179	0.8584	15.0321	147	0.7937	13.1298	182	0.8535	14.7172	150	0.8193	13.7597	153	0.8091	12.699	169	0.84	13.8196	177	0.8686	15.0079	167	0.8794	14.3171	175	0.8495	15.2687	166	0.8426	15.3148	135	0.8453	12.7223
ENSRNOG00000001877	Med15	3243	119	0.6136	10.2677	115	0.7385	9.0649	102	0.675	8.55145	159	0.839	12.0684	87	0.6855	7.49091	117	0.7672	9.11512	129	0.737	9.90136	129	0.7715	10.2668	99	0.7354	7.96657	117	0.8023	9.58182	98	0.728	8.4865	91	0.7083	8.04953
ENSRNOG00000015541	Gnb3	1557	119	0.8407	21.3862	203	0.9679	33.3288	192	0.9653	33.5273	214	0.9461	33.8317	178	0.9737	31.9222	207	0.9872	33.5896	175	0.9743	27.977	201	0.9762	33.3194	206	0.9814	34.5272	191	0.9968	32.5802	212	0.991	38.2381	181	0.9807	33.3477
ENSRNOG00000023919	Gbas	959	119	0.9135	34.7219	290	0.9844	77.3021	228	0.9823	64.6402	330	0.9927	84.702	256	0.9896	74.539	294	0.9885	77.4555	276	0.9927	71.6379	303	0.9917	81.5482	375	0.9937	102.046	258	0.9917	71.4513	305	0.9979	89.3162	239	0.9937	71.4916
ENSRNOG00000002835	Luc7l3	3331	119	0.5086	9.99649	189	0.6596	14.5044	156	0.7079	12.7332	166	0.7382	12.2668	195	0.6545	16.3464	167	0.755	12.6668	163	0.7118	12.1805	207	0.7769	16.0393	133	0.6554	10.4198	205	0.7832	16.3451	204	0.7259	17.1991	133	0.6331	11.4539
ENSRNOG00000018053	Fech	2964	118	0.6791	11.1398	277	0.7527	23.8899	214	0.7696	19.6301	264	0.8546	21.9242	266	0.7864	25.0591	219	0.7959	18.6676	196	0.7551	16.46	265	0.7874	23.0759	272	0.7729	23.9482	211	0.8279	18.9066	241	0.7301	22.8343	254	0.7945	24.5828
ENSRNOG00000021890	Nob1	1537	118	0.8412	21.4824	140	0.9733	23.2845	117	0.9662	20.6966	155	0.9362	24.8231	115	0.9453	20.8923	162	0.9577	26.6296	146	0.9792	23.6446	149	0.9388	25.0209	177	0.9727	30.0526	132	0.9512	22.8091	169	0.9571	30.8789	141	0.9109	26.3161
ENSRNOG00000013002	Gpbp1	3305	118	0.5864	9.99047	199	0.813	15.392	145	0.7655	11.9284	243	0.8817	18.0981	183	0.7646	15.4611	147	0.7555	11.2375	207	0.83	15.5902	175	0.8175	13.6665	181	0.7858	14.2919	223	0.8735	17.9202	188	0.7918	15.9748	125	0.7552	10.8496
ENSRNOG00000008277	Bag1	1308	118	0.8662	25.2435	204	0.9495	39.8689	245	0.948	50.9266	178	0.9182	33.4973	161	0.9495	34.3701	270	0.9442	52.153	169	0.948	32.1611	172	0.9488	33.9399	261	0.9709	52.0734	168	0.9258	34.1123	191	0.9274	41.0086	206	0.9396	45.1789
ENSRNOG00000014722	Raph1	3997	118	0.6625	8.26082	80	0.5802	5.11644	68	0.5639	4.62553	122	0.7641	7.51318	89	0.5834	6.21753	102	0.6632	6.44747	112	0.659	6.97487	127	0.7726	8.20087	125	0.7511	8.16129	100	0.6662	6.64469	82	0.6067	5.76141	74	0.5827	5.31097
ENSRNOG00000009069	Tnfaip1	3858	118	0.6179	8.55845	211	0.902	13.9808	160	0.7444	11.2757	217	0.853	13.8451	173	0.7745	12.5212	207	0.865	13.556	180	0.8227	11.6135	212	0.9072	14.1829	196	0.8287	13.258	167	0.8326	11.4964	230	0.8839	16.7423	193	0.8224	14.3506
ENSRNOG00000037638	Timm50	1165	118	0.9348	28.3421	216	0.994	47.3958	187	0.9931	43.6418	233	0.9931	49.2298	187	0.994	44.8206	235	0.9914	50.9642	174	0.9931	37.1771	211	0.9914	46.7463	247	0.9957	55.3292	174	0.9957	39.6673	200	0.9923	48.2118	199	0.9785	49.0008
ENSRNOG00000009432	Eif2s1	1434	118	0.7664	23.0254	240	0.9331	42.7833	218	0.9338	41.3327	256	0.9435	43.9429	243	0.94	47.3172	229	0.9533	40.3469	217	0.9561	37.6672	222	0.9623	39.9571	198	0.9616	36.0329	219	0.9777	40.5606	245	0.984	47.9807	222	0.9365	44.4099
ENSRNOG00000006067	Aifm1	2103	118	0.737	15.7007	293	0.9681	35.6156	210	0.9049	27.1498	256	0.9272	29.9639	201	0.97	26.6882	220	0.9149	26.4306	227	0.9415	26.8682	269	0.9496	33.0144	228	0.9677	28.293	215	0.9653	27.1524	288	0.9786	38.4594	205	0.9582	27.9634
ENSRNOG00000021035	Rpl18	641	118	0.8799	51.5109	356	0.9828	141.972	400	0.9548	169.664	292	0.9626	112.13	273	0.9485	118.923	414	0.9501	163.18	309	0.9392	119.992	317	0.9485	127.641	396	0.9579	161.22	277	0.9672	114.771	384	0.9766	168.237	344	0.9828	153.949
ENSRNOG00000006985	Ccnk	2515	118	0.6632	13.1286	77	0.7042	7.82645	81	0.7189	8.75656	128	0.8596	12.5277	91	0.7801	10.1034	99	0.8095	9.94536	92	0.771	9.10546	101	0.8505	10.3651	99	0.8159	10.2726	85	0.7463	8.97615	92	0.769	10.273	78	0.7153	8.89677
ENSRNOG00000023210	Trappc10	6601	117	0.4299	4.95965	158	0.5784	6.1187	118	0.501	4.86025	200	0.6513	7.45793	148	0.5945	6.26057	156	0.5749	5.97088	161	0.5878	6.07111	196	0.6651	7.66367	161	0.5848	6.36501	177	0.6326	7.12152	185	0.6408	7.87066	154	0.5932	6.69248
ENSRNOG00000004208	Crim1	4076	117	0.5842	8.03206	156	0.6867	9.78369	118	0.6676	7.87108	194	0.7696	11.7156	172	0.7301	11.783	132	0.6114	8.18207	159	0.7208	9.70991	168	0.6533	10.6381	138	0.7264	8.83543	185	0.7233	12.0544	199	0.7561	13.711	162	0.71	11.4014
ENSRNOG00000047902	Fxr1	1611	117	0.8895	20.322	300	0.9764	47.6034	200	0.9758	33.7537	354	0.9882	54.0886	295	0.977	51.1315	240	0.9783	37.6391	295	0.982	45.5805	313	0.9832	50.1463	264	0.9783	42.7653	288	0.987	47.4795	358	0.9832	62.4075	221	0.9752	39.3525
ENSRNOG00000006479	Lama5	11307	117	0.334	2.89543	94	0.2994	2.12516	131	0.3875	3.15	139	0.3928	3.02598	113	0.347	2.79057	138	0.3912	3.08358	160	0.4143	3.52229	145	0.3834	3.30987	125	0.3775	2.885	179	0.4619	4.2045	114	0.3306	2.83144	141	0.3786	3.57724
ENSRNOG00000002125	Ccni	2671	117	0.6533	12.2571	201	0.8604	19.2369	141	0.8244	14.3526	255	0.8974	23.4998	210	0.8263	21.9537	229	0.9315	21.6613	214	0.897	19.9431	212	0.8869	20.4858	184	0.8888	17.9774	210	0.8911	20.8811	237	0.8596	24.9186	185	0.8551	19.8689
ENSRNOG00000048981	Ahsa1	1391	117	0.8663	23.5361	288	0.9554	52.927	210	0.9533	41.0467	275	0.9863	48.6635	236	0.931	47.3748	241	0.9662	43.7737	37	0.6485	6.62105	37	0.6643	6.86538	37	0.6154	6.94157	266	0.9813	50.7883	305	0.9712	61.5775	215	0.9705	44.3391
ENSRNOG00000003117	Psmd12	1485	117	0.9333	22.0462	323	0.9906	55.6017	309	0.9717	56.5742	247	0.9737	40.942	191	0.9529	35.9144	214	0.998	36.4092	57	0.7401	9.55434	55	0.7859	9.55931	51	0.7805	8.96245	31	0.5832	5.54427	41	0.7414	7.75366	35	0.633	6.7611
ENSRNOG00000002275	Fip1l1	1894	117	0.7756	17.2855	153	0.8886	20.6502	103	0.8374	14.7858	167	0.887	21.7037	119	0.8458	17.544	128	0.8553	17.0747	132	0.8453	17.3479	122	0.8722	16.6253	99	0.8353	13.6407	166	0.8559	23.2775	141	0.8617	20.9068	123	0.7772	18.6295
ENSRNOG00000018475	Eif4enif1	3625	117	0.6143	9.03136	116	0.7194	8.18017	87	0.6047	6.52526	140	0.7914	9.50645	99	0.7001	7.62587	113	0.7211	7.87579	120	0.7388	8.23997	126	0.7655	8.97125	129	0.8033	9.28677	108	0.717	7.9127	114	0.7644	8.83174	109	0.6557	8.6257
ENSRNOG00000000164	Lamp2	1747	117	0.7676	18.7399	259	0.9817	37.8982	189	0.9536	29.4141	236	0.9159	33.252	202	0.9107	32.2865	184	0.9204	26.6102	193	0.9044	27.499	228	0.9565	33.6847	184	0.941	27.4858	231	0.9645	35.1179	222	0.9754	35.6869	195	0.9845	32.0197
ENSRNOG00000000064	Atp5i	289	117	0.9308	113.283	614	0.9827	543.104	709	0.9965	667.014	500	0.9619	425.863	513	0.9827	495.657	789	0.9965	689.767	485	0.9931	417.73	519	0.9827	463.511	802	0.9862	724.202	456	0.9931	419.06	614	0.9758	596.65	632	0.9862	627.329
ENSRNOG00000006992	Rpl7	847	117	0.7273	38.6525	497	0.7497	149.998	615	0.7532	197.414	412	0.7497	119.732	343	0.7473	113.077	777	0.7497	231.772	353	0.7438	103.739	453	0.7497	138.04	719	0.7544	221.528	358	0.7497	112.256	452	0.7485	149.866	533	0.7521	180.518
ENSRNOG00000009057	Sec62	1818	117	0.6348	18.0081	227	0.7338	31.9186	186	0.6975	27.8167	203	0.6958	27.4853	191	0.7184	29.336	192	0.6876	26.6828	190	0.714	26.0143	200	0.7387	28.394	186	0.7239	26.6994	233	0.6496	34.0385	264	0.736	40.7811	173	0.6601	27.2978
ENSRNOG00000000340	RGD1304704	1158	117	0.8178	28.2717	223	0.8402	49.2276	257	0.8299	60.3408	228	0.8463	48.4646	179	0.8299	43.1625	243	0.8359	53.0177	219	0.8428	47.0747	250	0.8515	55.7214	279	0.8489	62.8751	182	0.8454	41.7419	226	0.8679	54.8087	241	0.8351	59.7014
ENSRNOG00000003827	Wipi1	1884	117	0.8668	17.3772	134	0.9384	18.1818	136	0.9029	19.6266	205	0.9782	26.7837	155	0.9268	22.9727	187	0.9724	25.0775	196	0.9522	25.8957	192	0.9257	26.3033	161	0.9761	22.3012	177	0.9729	24.9518	193	0.9634	28.7691	156	0.9214	23.7531
ENSRNOG00000004006	Dnajb9	1926	117	0.6812	16.9983	318	0.9777	42.2069	223	0.9382	31.48	276	0.9782	35.2737	290	0.9808	42.044	267	0.9969	35.025	294	0.9886	37.9965	301	0.9616	40.3367	214	0.9569	28.9962	259	0.9881	35.7151	331	0.9725	48.2637	209	0.9611	31.1291
ENSRNOG00000015701	Rreb1	8452	117	0.4177	3.87348	108	0.4224	3.26645	55	0.2654	1.76925	176	0.6113	5.12568	121	0.4881	3.9975	85	0.3539	2.54087	132	0.4986	3.88747	116	0.4695	3.54233	89	0.3725	2.74798	144	0.5376	4.52493	133	0.4885	4.41918	90	0.3964	3.05463
ENSRNOG00000008192	Slc48a1	1550	117	0.7781	21.1217	165	0.951	27.2122	159	0.9529	27.8902	147	0.9116	23.3445	115	0.8619	20.7171	182	0.9723	29.6663	158	0.9671	25.3733	159	0.9684	26.4762	171	0.9329	28.7904	121	0.9026	20.733	154	0.9529	27.9022	161	0.9535	29.7968
ENSRNOG00000015540	Ppp6r3	4785	116	0.5553	6.78346	172	0.7233	9.1888	143	0.7628	8.12532	276	0.8968	14.1979	204	0.8418	11.9045	186	0.823	9.82097	236	0.8188	12.2767	212	0.852	11.4352	189	0.8134	10.3077	207	0.8334	11.4894	219	0.8318	12.8532	171	0.7793	10.2516
ENSRNOG00000005802	Usp24	8651	116	0.4521	3.75204	217	0.637	6.41218	138	0.4714	4.3371	332	0.7327	9.44648	256	0.7072	8.26296	163	0.5668	4.76041	258	0.667	7.42345	298	0.7675	8.89079	223	0.6088	6.727	229	0.6501	7.03037	300	0.7642	9.73877	156	0.5513	5.1729
ENSRNOG00000015840	Hsd17b4	2584	116	0.7593	12.5615	367	0.9752	36.3066	306	0.9702	32.197	347	0.9439	33.0548	322	0.9741	34.7957	350	0.9644	34.2215	53	0.5991	5.10547	53	0.5666	5.29387	53	0.6196	5.35262	307	0.9714	31.554	374	0.9741	40.647	319	0.9845	35.4139
ENSRNOG00000026048	Gbf1	6369	116	0.4792	5.09638	135	0.5445	5.41844	99	0.513	4.2262	157	0.6879	6.06773	129	0.6097	5.65562	117	0.5335	4.64128	136	0.566	5.3152	141	0.6279	5.71397	109	0.5373	4.4662	125	0.5194	5.21252	129	0.6068	5.68811	92	0.5045	4.14374
ENSRNOG00000019875	Matr3	3780	116	0.4566	8.587	391	0.7656	26.4422	284	0.7243	20.4274	395	0.7378	25.7219	367	0.7643	27.1104	313	0.7487	20.9207	354	0.7291	23.3111	382	0.7458	26.0833	292	0.6992	20.1592	336	0.7159	23.6078	427	0.7418	31.7238	279	0.7278	21.1733
ENSRNOG00000012650	Mrpl3	1647	116	0.6497	19.7079	218	0.8221	33.8357	193	0.8585	31.8603	215	0.8391	32.1324	169	0.8239	28.652	193	0.8197	29.6065	210	0.85	31.7379	224	0.8579	35.103	223	0.8087	35.3341	190	0.8549	30.6386	199	0.8264	33.9319	183	0.8361	31.8738
ENSRNOG00000010735	Nfyc	1936	116	0.7066	16.7659	98	0.8161	12.94	90	0.7758	12.6393	15	0.3332	1.90715	15	0.3099	2.16346	15	0.2991	1.95753	99	0.7645	12.7286	102	0.8011	13.5983	92	0.766	12.4013	100	0.7546	13.7184	77	0.7252	11.1695	93	0.7893	13.7801
ENSRNOG00000023650	Cops4	1572	116	0.8397	20.6481	209	0.9854	33.9865	212	0.9784	36.6665	199	0.9854	31.1601	202	0.9625	35.8807	220	0.9593	35.3585	225	0.9459	35.6272	239	0.9911	39.2406	243	0.9809	40.3401	166	0.9771	28.0456	260	0.9847	46.4483	213	0.979	38.869
ENSRNOG00000039091	Pnpla8	4346	116	0.5649	7.46867	370	0.9112	21.7633	232	0.8251	14.5139	397	0.9116	22.4853	382	0.9275	24.5435	266	0.8935	15.4638	57	0.4119	3.26466	57	0.4457	3.38513	57	0.4763	3.42269	23	0.2246	1.40555	23	0.2264	1.48623	23	0.2324	1.51815
ENSRNOG00000008479	Slc8a1	2916	116	0.823	11.1313	158	0.8656	13.851	106	0.7963	9.88337	236	0.9383	19.9215	179	0.8789	17.1407	156	0.8872	13.5164	196	0.9005	16.731	197	0.8556	17.4369	144	0.8134	12.8872	162	0.8591	14.7549	177	0.8649	17.0465	123	0.8131	12.1002
ENSRNOG00000011489	R3hdm4	1785	116	0.7384	18.1842	164	0.9227	23.4865	173	0.907	26.3508	188	0.9109	25.9249	133	0.8779	20.8054	141	0.9513	19.9574	147	0.9378	20.4989	160	0.93	23.1351	171	0.9417	25.0001	149	0.9541	22.1696	155	0.9429	24.3861	142	0.9552	22.8205
ENSRNOG00000010624	Ap3b1	3712	116	0.563	8.7443	167	0.7624	11.5006	104	0.701	7.61749	163	0.7761	10.8088	136	0.7174	10.2304	124	0.7193	8.4399	151	0.7158	10.1256	151	0.8322	10.4993	130	0.7796	9.13941	157	0.7764	11.2331	173	0.7953	13.0884	119	0.733	9.19634
ENSRNOG00000049414	Mia3	3660	115	0.5833	8.79209	161	0.7921	11.2449	111	0.6243	8.24572	191	0.853	12.8455	171	0.8082	13.046	127	0.7333	8.7669	169	0.8033	11.4936	180	0.8361	12.6935	138	0.7298	9.83968	183	0.8333	13.2794	214	0.8383	16.4203	131	0.7044	10.2675
ENSRNOG00000033688	Cep170b	4728	115	0.6216	6.80606	100	0.6495	5.40673	78	0.5497	4.48543	158	0.768	8.22579	118	0.6413	6.96894	96	0.5833	5.13	138	0.7363	7.2653	122	0.6641	6.65998	109	0.6434	6.01634	107	0.5998	6.01056	122	0.706	7.24656	84	0.5802	5.09657
ENSRNOG00000011375	Tsc2	5653	115	0.4541	5.69238	162	0.6538	7.32568	97	0.4705	4.6653	160	0.64	6.96689	145	0.5958	7.16228	111	0.5546	4.96098	125	0.6168	5.50406	147	0.625	6.71164	139	0.6646	6.4168	132	0.5891	6.2016	125	0.5385	6.20984	117	0.4943	5.93722
ENSRNOG00000037402	Myeov2	486	115	0.9815	66.212	164	0.9938	86.262	204	0.9938	114.125	177	0.9979	89.6469	153	0.9938	87.9057	217	0.9897	112.81	172	0.9918	88.0936	164	0.9918	87.0959	196	0.9074	105.245	138	0.9938	75.414	187	0.9774	108.057	161	0.9959	95.0311
ENSRNOG00000020619	Eif3g	1042	115	0.9338	30.882	280	0.9914	68.6914	250	0.9827	65.2317	277	0.9971	65.435	225	0.9942	60.2944	302	0.9981	73.2256	271	0.9942	64.7372	273	0.9923	67.6216	285	0.9875	71.3773	253	0.9942	64.4855	289	0.9962	77.8896	235	0.9971	64.6958
ENSRNOG00000006938	Mapk8ip1	2860	115	0.6769	11.2514	167	0.8	14.9267	151	0.7822	14.3548	185	0.8192	15.9222	142	0.7507	13.8639	161	0.836	14.2227	176	0.8297	15.3179	155	0.8154	13.988	192	0.8192	17.5194	142	0.8273	13.1866	158	0.7937	15.5146	166	0.7696	16.6501
ENSRNOG00000023668	Scyl1	2774	115	0.6222	11.6002	156	0.8381	14.3757	122	0.8028	11.9575	153	0.8313	13.5764	121	0.8057	12.1798	153	0.7974	13.935	121	0.7808	10.8575	126	0.805	11.7234	138	0.8125	12.9824	132	0.7909	12.6379	138	0.8266	13.9708	114	0.7675	11.7889
ENSRNOG00000007326	Prepl	2298	115	0.6701	14.0031	223	0.9238	24.8066	137	0.8486	16.209	43	0.6166	4.60592	43	0.5579	5.22493	43	0.5248	4.72761	199	0.8956	21.5554	231	0.9051	25.9449	157	0.819	17.8292	196	0.9108	22.6524	229	0.9038	27.9856	155	0.8225	19.349
ENSRNOG00000046345	Rpn1	2220	115	0.7775	14.4951	292	0.9869	33.6234	255	0.9387	31.2301	315	0.9874	34.9266	243	0.9617	30.5644	310	0.9905	35.2803	259	0.9761	29.0402	312	0.9739	36.2737	285	0.9784	33.5023	246	0.9775	29.4301	294	0.9649	37.1915	259	0.9743	33.4675
ENSRNOG00000024011	Ank3	7794	115	0.3057	4.12869	172	0.4144	5.64131	117	0.287	4.08143	228	0.4483	7.20067	164	0.4284	5.87551	144	0.3575	4.66794	190	0.4461	6.068	167	0.3882	5.53027	130	0.3776	4.35277	175	0.412	5.9633	199	0.437	7.17038	146	0.3895	5.37364
ENSRNOG00000047605	Ptprk	3237	115	0.7028	9.94101	109	0.7698	8.60787	108	0.7695	9.07126	197	0.9249	14.9803	119	0.835	10.2652	122	0.7918	9.52227	158	0.8888	12.1497	132	0.8554	10.525	108	0.8011	8.70691	162	0.8879	13.2917	153	0.8777	13.2739	131	0.8332	11.6093
ENSRNOG00000025244	Trrap	12520	115	0.3271	2.57021	155	0.3863	3.16475	122	0.3276	2.64937	226	0.524	4.44327	154	0.4367	3.43462	144	0.3773	2.90591	165	0.4013	3.28044	166	0.4456	3.42211	167	0.4621	3.48093	148	0.3986	3.13954	206	0.5005	4.62075	168	0.4342	3.84929
ENSRNOG00000028225	Tnni3k	2982	114	0.7529	10.6973	214	0.9383	18.345	162	0.9024	14.7705	212	0.9688	17.4995	192	0.9027	17.9786	196	0.9162	16.6063	170	0.8602	14.1904	226	0.9467	19.561	239	0.9645	20.9157	15	0.2176	1.33596	15	0.1968	1.41264	15	0.2347	1.44298
ENSRNOG00000002099	Wdfy3	13709	114	0.249	2.32688	100	0.2791	1.86469	91	0.2396	1.80477	129	0.332	2.31623	104	0.2727	2.11831	112	0.3121	2.06412	131	0.3469	2.37858	130	0.3504	2.44753	144	0.3628	2.74119	120	0.318	2.32479	123	0.3501	2.5197	95	0.2643	1.9879
ENSRNOG00000020442	Ubl5	463	114	0.9935	68.8968	178	0.9978	98.2768	162	0.9287	95.1307	133	0.9611	70.708	172	0.9914	103.731	208	0.9978	113.503	167	0.9935	89.7817	178	0.9676	99.2269	195	0.9827	109.91	134	0.9849	76.8657	201	0.9244	121.917	188	0.9266	116.48
ENSRNOG00000010960	Ankh	2456	114	0.6633	12.9883	184	0.8852	19.1514	121	0.7655	13.395	244	0.9064	24.4545	170	0.8363	19.3278	169	0.8893	17.3853	189	0.8563	19.1552	194	0.8652	20.3875	175	0.8583	18.5949	200	0.8721	21.6277	188	0.8156	21.497	143	0.8538	16.7026
ENSRNOG00000001064	Sbno1	5133	114	0.5658	6.21454	203	0.8042	10.1097	139	0.6912	7.36258	235	0.8549	11.2692	188	0.7797	10.227	205	0.753	10.0903	221	0.8149	10.717	207	0.7991	10.4085	166	0.7084	8.43956	224	0.8165	11.5901	241	0.8436	13.1855	172	0.7539	9.61243
ENSRNOG00000018945	Nutf2	1927	114	0.6959	16.5538	203	0.9559	26.9294	180	0.8718	25.3967	177	0.8869	22.6094	150	0.9097	21.7356	205	0.9414	26.8779	185	0.8993	23.8969	204	0.9216	27.3237	166	0.8552	22.4807	194	0.8054	26.738	199	0.9071	29.0015	156	0.9087	23.223
ENSRNOG00000019649	Cul4a	2842	114	0.7308	11.2242	195	0.9578	17.5397	141	0.8297	13.4891	308	0.9887	26.6763	202	0.9363	19.8467	162	0.8983	14.4017	214	0.9258	18.7431	261	0.9258	23.7032	208	0.924	19.0995	207	0.9117	19.3444	251	0.9335	24.8027	180	0.9546	18.1687
ENSRNOG00000008297	Oser1	1566	114	0.8231	20.3699	271	0.9828	44.2374	272	0.9885	47.2241	288	0.9898	45.2688	233	0.9828	41.5457	261	0.9304	42.1087	243	0.9649	38.6248	239	0.9349	39.3909	232	0.9872	38.6615	200	0.9802	33.9193	233	0.9789	41.7843	237	0.9738	43.4143
ENSRNOG00000017251	WDR55	2619	114	0.6063	12.1799	228	0.6686	22.2542	151	0.711	15.6757	238	0.7862	22.3686	223	0.7392	23.7756	200	0.7434	19.2938	200	0.7866	19.0085	247	0.7281	24.3417	193	0.7652	19.2311	205	0.74	20.7887	276	0.7625	29.5953	199	0.6212	21.7968
ENSRNOG00000022664	Kat7	3278	114	0.6577	9.73131	158	0.7712	12.3214	125	0.7264	10.3678	164	0.8273	12.315	129	0.7752	10.9886	146	0.7477	11.253	23	0.23	1.74651	23	0.3273	1.81096	23	0.2886	1.83106	124	0.7776	10.0467	139	0.7999	11.9084	128	0.7611	11.2015
ENSRNOG00000019348	Zc3h7b	5467	114	0.4664	5.83487	152	0.6612	7.10733	111	0.5963	5.52027	240	0.8255	10.8059	144	0.6515	7.35488	154	0.6764	7.11697	162	0.6889	7.37595	171	0.6892	8.07304	191	0.7975	9.11732	151	0.6616	7.33562	191	0.7554	9.81146	137	0.6186	7.18865
ENSRNOG00000008666	Etl4	5946	114	0.4988	5.36482	85	0.444	3.65432	64	0.3865	2.92645	118	0.4966	4.8849	77	0.4247	3.616	68	0.394	2.8894	98	0.4632	4.10255	89	0.5066	3.86327	86	0.4721	3.77447	90	0.4728	4.02	96	0.4433	4.53415	61	0.3522	2.94294
ENSRNOG00000011756	Phf3	7863	113	0.3302	4.02129	107	0.4343	3.47863	83	0.3378	2.86996	162	0.5773	5.07137	110	0.4501	3.90631	107	0.4137	3.4381	126	0.4758	3.98873	136	0.467	4.46417	94	0.4063	3.11977	137	0.5119	4.62744	98	0.3972	3.50015	93	0.3645	3.3929
ENSRNOG00000048862	Mrps36	920	113	0.5989	34.3689	249	0.8837	69.1869	276	0.85	81.5657	198	0.837	52.9756	180	0.8511	54.632	311	0.8696	85.4075	194	0.8033	52.4887	221	0.8848	62.0004	240	0.8185	68.0779	195	0.8707	56.2932	219	0.838	66.8506	255	0.7957	79.5112
ENSRNOG00000015906	Tgif1	1480	113	0.6845	21.3645	130	0.8872	22.454	100	0.8088	18.3707	177	0.8297	29.4381	109	0.9101	20.5649	142	0.9115	24.241	110	0.8912	18.5005	120	0.925	20.9271	121	0.8162	21.3357	145	0.9304	26.0205	117	0.8365	22.201	112	0.8838	21.7086
ENSRNOG00000013136	Oxsr1	4525	113	0.5512	6.98771	241	0.8113	13.6148	145	0.6924	8.71236	261	0.8248	14.1978	206	0.7976	12.7119	196	0.7538	10.9436	228	0.7985	12.542	243	0.8846	13.8605	230	0.8274	13.2645	216	0.8027	12.6778	237	0.8389	14.7089	175	0.7129	11.0942
ENSRNOG00000011421	Smap2	2843	113	0.7172	11.1218	138	0.7999	12.4084	117	0.7467	11.1891	127	0.8234	10.9958	140	0.7766	13.7503	113	0.6817	10.0421	152	0.7956	13.3082	135	0.751	12.256	131	0.7995	12.0248	128	0.8607	11.9575	152	0.8217	15.0147	123	0.7851	12.4109
ENSRNOG00000000539	Zfand3	2402	113	0.6736	13.1638	183	0.8347	19.4756	186	0.8897	21.0536	233	0.8493	23.8771	190	0.918	22.0873	183	0.8997	19.2487	181	0.8626	18.7568	172	0.8372	18.4819	223	0.8947	24.2278	161	0.863	17.8017	201	0.9313	23.5002	198	0.8847	23.6466
ENSRNOG00000026616	Ndufb2	456	113	0.9825	69.3408	283	0.9605	158.648	344	0.9803	205.107	226	0.9737	121.995	215	0.9518	131.654	342	0.9868	189.489	231	0.9496	126.095	271	0.9583	153.389	343	0.9671	196.296	247	0.9649	143.86	320	0.9561	197.076	305	0.989	191.872
ENSRNOG00000001996	Ythdc1	3283	113	0.5449	9.63125	203	0.8867	15.8066	112	0.7676	9.27542	187	0.9101	14.0207	180	0.8955	15.3096	148	0.8428	11.3898	172	0.8754	13.041	193	0.9232	15.1732	131	0.7813	10.4132	147	0.8136	11.892	206	0.9034	17.6216	151	0.8891	13.1942
ENSRNOG00000025890	OPA3	2955	112	0.7252	10.6056	181	0.8721	15.6579	154	0.8528	14.1693	194	0.8717	16.16	167	0.8951	15.7805	144	0.8338	12.312	179	0.8311	15.0781	180	0.8724	15.7219	180	0.9103	15.8964	181	0.8717	16.2678	205	0.9208	19.4825	134	0.777	13.0084
ENSRNOG00000047934	RGD1566359	4365	112	0.4481	7.17974	189	0.7913	11.0685	133	0.737	8.28426	211	0.8399	11.8986	174	0.7402	11.1308	162	0.7274	9.37679	180	0.7631	10.2646	209	0.794	12.3581	169	0.7826	10.1038	160	0.7613	9.7352	173	0.7585	11.1304	155	0.7448	10.1865
ENSRNOG00000004864	Prpf40a	3564	112	0.6027	8.79337	191	0.7828	13.6996	135	0.807	10.2987	223	0.8816	15.4016	154	0.7994	12.0655	143	0.7887	10.1373	163	0.8193	11.3842	210	0.8648	15.208	126	0.7416	9.22605	183	0.8109	13.6371	181	0.8712	14.2623	138	0.7677	11.1075
ENSRNOG00000016368	Ppp1r14c	2770	112	0.6935	11.3139	294	0.8473	27.1319	243	0.7801	23.8514	52	0.5116	4.62085	52	0.4603	5.24186	52	0.5296	4.74293	265	0.8419	23.8132	261	0.8365	24.3193	231	0.8134	21.7628	260	0.8542	24.9289	297	0.8448	30.1111	206	0.8664	21.3336
ENSRNOG00000011912	Tmem38a	1448	112	0.8018	21.6434	249	0.9282	43.9585	171	0.9337	32.1081	245	0.8771	41.6481	216	0.8709	41.6531	199	0.9302	34.7223	228	0.9102	39.1939	220	0.9275	39.2143	231	0.9019	41.6319	193	0.9006	35.3995	203	0.913	39.371	184	0.9054	36.4523
ENSRNOG00000019939	CCND2	1185	112	0.9038	26.4469	133	0.9646	28.691	93	0.9418	21.3379	164	0.9949	34.0662	125	0.9823	29.4546	120	0.9755	25.5851	151	0.984	31.7184	135	0.9865	29.404	129	0.9494	28.4089	118	0.9747	26.4468	156	0.9848	36.9705	79	0.9325	19.1243
ENSRNOG00000000098	Rnf115	1080	112	0.7148	29.0181	81	0.8472	19.1723	61	0.7509	15.3565	106	0.8796	24.1591	74	0.7935	19.1324	77	0.9037	18.0132	105	0.8759	24.2001	83	0.7278	19.8356	95	0.775	22.9553	108	0.9157	26.5588	70	0.8222	18.2022	76	0.8315	20.1867
ENSRNOG00000043370	Fubp1	2346	112	0.7157	13.3587	187	0.9241	20.3763	118	0.8832	13.6754	187	0.9139	19.6206	165	0.8832	19.6389	146	0.9263	15.7235	141	0.9147	14.9604	172	0.9437	18.923	129	0.8905	14.3498	145	0.9003	16.4153	181	0.9288	21.6671	121	0.9297	14.7956
ENSRNOG00000025481	Dctn2	1651	112	0.9467	18.9822	274	0.9945	42.4244	230	0.9885	37.8763	264	0.9921	39.36	234	0.9964	39.5759	255	0.997	39.0226	230	0.9964	34.6763	240	0.9964	37.5193	269	0.997	42.5195	232	0.98	37.3207	234	0.9964	39.8032	209	0.9836	36.3141
ENSRNOG00000045733	2310002L09Rik	813	112	0.925	38.5481	184	0.9828	57.8548	144	0.9434	48.1569	237	0.9717	71.7556	199	0.9459	68.3478	190	0.9459	59.0455	248	0.968	75.93	252	0.9791	80.0019	210	0.968	67.408	211	0.9434	68.9288	204	0.941	70.4675	141	0.9717	49.7513
ENSRNOG00000017977	Smpd1	2309	112	0.7224	13.5728	166	0.9104	18.3779	138	0.8922	16.2496	169	0.9216	18.0161	141	0.8623	17.0513	157	0.8887	17.1791	139	0.8289	14.9845	143	0.8553	15.9846	161	0.8653	18.1964	15	0.259	1.72535	15	0.2642	1.82439	15	0.2824	1.86356
ENSRNOG00000020438	Prpf38b	2993	111	0.572	10.3775	149	0.7484	12.726	92	0.6198	8.35733	165	0.838	13.5699	148	0.727	13.8076	133	0.6973	11.2271	138	0.7875	11.4769	136	0.7187	11.728	112	0.6572	9.7655	163	0.725	14.464	145	0.7447	13.6054	88	0.6762	8.43436
ENSRNOG00000001687	Crybg3	5196	111	0.566	5.97763	183	0.7329	9.00314	115	0.5672	6.01749	269	0.8755	12.7433	162	0.7365	8.70579	175	0.7334	8.50927	237	0.8447	11.3535	227	0.797	11.2758	192	0.7654	9.64306	226	0.8195	11.5518	193	0.7286	10.4313	161	0.7331	8.88859
ENSRNOG00000016795	Rabl6	3190	111	0.7041	9.7366	132	0.7589	10.5778	114	0.8069	9.71629	153	0.8367	11.8059	103	0.7357	9.01589	144	0.7831	11.405	124	0.8069	9.67572	120	0.7505	9.70914	132	0.8028	10.7986	123	0.7809	10.2406	145	0.7708	12.7652	132	0.7668	11.8702
ENSRNOG00000015692	Taok1	3165	111	0.6581	9.81351	148	0.837	11.9536	104	0.7286	8.934	234	0.9267	18.1987	167	0.8227	14.7335	115	0.7747	9.1801	166	0.8126	13.0553	172	0.8518	14.0264	135	0.7665	11.1312	171	0.8866	14.3493	204	0.9207	18.1011	94	0.7074	8.51981
ENSRNOG00000005464	Lgalsl	3507	111	0.6122	8.85651	219	0.8503	15.9632	198	0.8646	15.3503	304	0.9056	21.3371	245	0.8774	19.5071	236	0.8911	17.002	227	0.8614	16.1117	295	0.9236	21.7108	207	0.8825	15.4034	240	0.8654	18.1754	296	0.9082	23.7031	195	0.8551	15.9505
ENSRNOG00000012886	Maff	1941	111	0.541	16.0019	205	0.8908	26.9986	197	0.9037	27.5948	181	0.8939	22.9536	148	0.8233	21.2911	189	0.8959	24.6014	177	0.8944	22.6986	177	0.9088	23.5363	203	0.9438	27.2931	156	0.8089	21.3456	204	0.9031	29.5158	178	0.8815	26.3069
ENSRNOG00000001488	Psmb1	1061	111	0.9425	29.2741	367	0.9849	88.4225	375	0.9708	96.0954	322	0.9416	74.7031	284	0.9877	74.7421	382	0.9623	90.9644	288	0.9557	67.5662	344	0.9623	83.6822	344	0.9463	84.6109	290	0.9105	72.5925	346	0.984	91.582	324	0.9708	87.6003
ENSRNOG00000011015	Hivep2	9400	111	0.3722	3.30423	97	0.4046	2.63789	65	0.251	1.88006	134	0.4491	3.50893	107	0.4003	3.17847	89	0.3427	2.39213	101	0.3964	2.67452	118	0.4176	3.24	85	0.3323	2.35979	124	0.4494	3.50351	119	0.4141	3.55524	94	0.3564	2.86864
ENSRNOG00000001710	Abcf3	2521	111	0.7735	12.3204	189	0.9453	19.1647	179	0.9163	19.3049	211	0.9238	20.6019	168	0.9298	18.6079	189	0.9215	18.9414	189	0.9441	18.6613	201	0.948	20.5785	179	0.9123	18.5295	178	0.9468	18.7524	235	0.9675	26.1785	174	0.9238	19.7994
ENSRNOG00000007781	Stau1	3073	111	0.6521	10.1073	139	0.7999	11.5628	115	0.7934	10.1747	150	0.8539	12.0151	136	0.7846	12.3577	126	0.8028	10.3593	145	0.8396	11.7451	146	0.8711	12.2625	128	0.8318	10.87	149	0.821	12.8775	159	0.8985	14.5306	135	0.794	12.6022
ENSRNOG00000025923	Zmiz2	4368	111	0.5813	7.11075	106	0.6165	6.20348	64	0.4689	3.98367	116	0.6706	6.53693	94	0.5728	6.00907	96	0.5659	5.5528	110	0.6165	6.26848	115	0.6804	6.79525	102	0.5964	6.09397	94	0.5902	5.7155	100	0.6067	6.42934	93	0.6049	6.10768
ENSRNOG00000016923	Clptm1l	2312	111	0.6821	13.4342	199	0.8551	22.0028	169	0.846	19.874	190	0.8599	20.2285	156	0.8452	18.8408	166	0.8516	18.1403	189	0.8421	20.3482	189	0.8404	21.0991	178	0.8413	20.0916	188	0.9096	21.5963	181	0.8322	21.9857	168	0.8214	20.8448
ENSRNOG00000019205	Gnpat	2851	111	0.7176	10.8943	247	0.8685	22.1468	201	0.8828	19.1684	243	0.8839	20.9801	198	0.845	19.3923	206	0.8429	18.2555	239	0.9004	20.8667	215	0.872	19.464	226	0.8695	20.6868	24	0.2918	2.23575	24	0.2746	2.36409	24	0.3227	2.41485
ENSRNOG00000000622	Hint1	609	111	0.7291	51.0013	241	0.7997	101.161	197	0.803	87.9499	183	0.7915	73.966	163	0.7997	74.7364	192	0.7997	79.654	181	0.798	73.9799	173	0.8062	73.3194	188	0.7997	80.5608	155	0.8062	67.5964	199	0.8013	91.7667	180	0.78	84.7874
ENSRNOG00000006839	ARL5A	2714	111	0.5099	11.4443	183	0.8545	17.2367	134	0.8301	13.424	191	0.7948	17.3229	160	0.8032	16.4616	175	0.8666	16.2911	167	0.8279	15.3165	180	0.8508	17.118	146	0.7874	14.0387	149	0.8467	14.5809	178	0.9071	18.4187	125	0.7874	13.2122
ENSRNOG00000008517	Cdc42ep1	2235	110	0.7347	13.7718	119	0.8658	13.6107	92	0.7351	11.1917	125	0.8908	13.7667	72	0.689	8.99533	98	0.7996	11.0783	115	0.8904	12.8077	109	0.855	12.5875	91	0.813	10.6254	110	0.7937	13.0715	97	0.7723	12.1883	104	0.8609	13.3485
ENSRNOG00000023176	Kidins220	7135	110	0.379	4.31394	109	0.4558	3.90521	82	0.3985	3.12469	156	0.6192	5.38182	111	0.4807	4.34401	92	0.4322	3.25775	131	0.5368	4.57014	143	0.6045	5.17288	104	0.4603	3.80384	112	0.48	4.16901	126	0.5437	4.95936	83	0.4174	3.33703
ENSRNOG00000016961	Rps27	340	110	0.6441	90.5293	207	0.7147	155.634	333	0.7353	266.288	191	0.6912	138.278	143	0.7088	117.441	297	0.7029	220.699	144	0.7	105.423	169	0.7382	128.292	234	0.7029	179.606	142	0.7	110.922	157	0.7529	129.679	243	0.7059	205.023
[truncated: 15,339 more rows]
