# Supplementary material for: Genome-Wide Expression Profiling of Anoxia/Reoxygenation in Rat Cardiomyocytes Uncovers the Role of MitoKATP in Energy Homeostasis
Source: Oxid Med Cell Longev. 2015 Jun 15;2015:756576. doi: 10.1155/2015/756576 (PMC4485557; doi:10.1155/2015/756576)
Supplement: Supplementary file 1 — Excel 1: Raw data of the expression of all the gene (4 groups × 3 replicates of the sequencing) . Excel 2: Significant differently expressed genes from Control versus A/R. Excel 3: Significant differently expressed genes from A/R versus DZ. Excel 4: Significant differently expressed genes from DZ versus DZ5HD. Supplementary Figure 1: Assessment of the DGE saturation degree. Supplementary Table 1: The raw data of DGE profile of 12 sequencings. Supplementary Table 2: DEGs significantly enriched GO terms from Control vs A/R (P<0.05). Supplementary Table 3: DEGs significantly enriched GO terms from A/R vs DZ (P<0.05). Supplementary Table 4: DEGs significantly enriched GO terms from DZ vs DZ5HD (P<0.05). Supplementary Table 5: Significantly enriched pathways for DEGs from Con vs A/R (P<0.01). Supplementary Table 6: Significantly enriched pathways for DEGs from A/R vs DZ (P<0.01). Supplementary Table 7: Significantly enriched pathways for DEGs from DZ vs DZ5HD (P<0.01). [file 756576.f1.zip › Excel2í¬í¬significant DEGs (Control-VS-Aú»R).xlsx]

## Sheet: Excel2——significant DEGs (Contr
GeneID	GeneName	log2Ratio(A/R/Control)	Qvalue	KEGG Orthology	GO Component	GO Function	GO Process	Blast nr
ENSRNOG00000015534	Cnep1r1	3.40478	0.8065	-	GO:0031224//intrinsic to membrane	-	-	gi|157818267|ref|NP_001099643.1|/5.67668e-68/CTD nuclear envelope phosphatase 1 regulatory subunit 1 [Rattus norvegicus]
ENSRNOG00000017468	Trappc6a	2.80775	0.805636	-	GO:0043231//intracellular membrane-bounded organelle	GO:0009975//cyclase activity;GO:0005506//iron ion binding	GO:0006164//purine nucleotide biosynthetic process;GO:0006810//transport	gi|149056758|gb|EDM08189.1|/1.19535e-88/rCG54352, isoform CRA_a [Rattus norvegicus]
ENSRNOG00000020440	Fads2	-4.54171	0.818189	K10226|1|0.0|929|rno:83512|fatty acid desaturase 2 (delta-6 desaturase) [EC:1.14.19.-]	GO:0043231//intracellular membrane-bounded organelle;GO:0016021//integral to membrane;GO:0031090//organelle membrane	GO:0016215;GO:0005506//iron ion binding	GO:0000038//very long-chain fatty acid metabolic process;GO:0006633//fatty acid biosynthetic process;GO:0006091//generation of precursor metabolites and energy;GO:0051234//establishment of localization	gi|13786182|ref|NP_112634.1|/0/fatty acid desaturase 2 [Rattus norvegicus]
ENSRNOG00000013118	Atox1	1.70511	0.800213	K07213|1|3e-33|141|rno:84355|copper chaperone	GO:0044444//cytoplasmic part	GO:0005507//copper ion binding;GO:0005515//protein binding	GO:0030003//cellular cation homeostasis;GO:0006950//response to stress;GO:0000041//transition metal ion transport	gi|16758088|ref|NP_445811.1|/1.72729e-32/copper transport protein ATOX1 [Rattus norvegicus]
ENSRNOG00000012576	Vimp	-3.60041	0.85745	K14025|1|3e-73|276|rno:286900|selenoprotein S	GO:0034385;GO:0031227//intrinsic to endoplasmic reticulum membrane	GO:0005515//protein binding	GO:0031348//negative regulation of defense response;GO:0032496//response to lipopolysaccharide;GO:0006984//ER-nucleus signaling pathway;GO:0043161//proteasomal ubiquitin-dependent protein catabolic process;GO:0001818//negative regulation of cytokine production;GO:0010558;GO:0006886//intracellular protein transport;GO:0019725//cellular homeostasis;GO:0002438//acute inflammatory response to antigen…	gi|111119003|ref|NP_775143.2|/2.30074e-72/selenoprotein S [Rattus norvegicus]
ENSRNOG00000043192	Ptpla	-3.15924	0.847498	K10703|1|8e-114|409|rno:680115|3-hydroxy acyl-CoA dehydratase [EC:4.2.1.-]	GO:0031224//intrinsic to membrane;GO:0043231//intracellular membrane-bounded organelle;GO:0031090//organelle membrane	GO:0004721//phosphoprotein phosphatase activity	GO:0006631//fatty acid metabolic process;GO:0023052//signaling;GO:0032501//multicellular organismal process;GO:0006464//cellular protein modification process	gi|354482481|ref|XP_003503426.1|/8.13102e-115/PREDICTED: 3-hydroxyacyl-CoA dehydratase 1-like, partial [Cricetulus griseus]
ENSRNOG00000019341	Tmem179b	3.42353	0.833755	-	-	-	-	gi|157818595|ref|NP_001103042.1|/1.24007e-76/transmembrane protein 179B precursor [Rattus norvegicus]
ENSRNOG00000002615	Pmm2	-3.70533	0.852332	K01840|1|1e-140|500|rno:302915|phosphomannomutase [EC:5.4.2.8]	GO:0044444//cytoplasmic part;GO:0044297//cell body	GO:0016868//intramolecular transferase activity, phosphotransferases	GO:0009226//nucleotide-sugar biosynthetic process;GO:0006013//mannose metabolic process;GO:0006487//protein N-linked glycosylation	gi|157820469|ref|NP_001100443.1|/1.06972e-139/phosphomannomutase 2 [Rattus norvegicus]
ENSRNOG00000040303	1110001A16RIK	2.3144	0.808237	-	-	-	-	gi|149050632|gb|EDM02805.1|/5.33789e-39/rCG62056, isoform CRA_a [Rattus norvegicus]
ENSRNOG00000012799	Prkaa1	-3.39368	0.815957	K07198|1|0.0|1029|mmu:105787|5'-AMP-activated protein kinase, catalytic alpha subunit [EC:2.7.11.11]	GO:0044444//cytoplasmic part	GO:0004690//cyclic nucleotide-dependent protein kinase activity;GO:0032559;GO:0043169//cation binding	GO:0010893//positive regulation of steroid biosynthetic process;GO:0046317;GO:0007169//transmembrane receptor protein tyrosine kinase signaling pathway;GO:0022402//cell cycle process;GO:0019318//hexose metabolic process;GO:0006464//cellular protein modification process;GO:0006950//response to stress;GO:0019217//regulation of fatty acid metabolic process;GO:0000165//MAPK cascade	gi|254763245|sp|P54645.2|AAPK1_RAT/0/RecName: Full=5'-AMP-activated protein kinase catalytic subunit alpha-1; Short=AMPK subunit alpha-1; AltName: Full=Acetyl-CoA carboxylase kinase; Short=ACACA kinase; AltName: Full=Hydroxymethylglutaryl-CoA reductase kinase; Short=HMGCR kinase; AltName: Full=Tau-protein kinase PRKAA1
ENSRNOG00000037352	RGD1562747	3.81825	0.820991	-	-	GO:0005488//binding	-	gi|157819089|ref|NP_001099682.1|/5.46668e-99/uncharacterized protein LOC292328 [Rattus norvegicus]
ENSRNOG00000010362	Anxa2	-3.74236	0.887422	-	GO:0032991//macromolecular complex;GO:0032432//actin filament bundle;GO:0048770;GO:0005578//proteinaceous extracellular matrix;GO:0005768//endosome;GO:0019898//extrinsic to membrane;GO:0044459//plasma membrane part	GO:0035091//phosphatidylinositol binding;GO:0005083//small GTPase regulator activity;GO:0055102//lipase inhibitor activity;GO:0003779//actin binding;GO:0046872//metal ion binding	GO:0030198//extracellular matrix organization;GO:0030195//negative regulation of blood coagulation;GO:0006906//vesicle fusion;GO:0001101//response to acid;GO:0044093;GO:0019222//regulation of metabolic process;GO:0048646//anatomical structure formation involved in morphogenesis;GO:0046903//secretion	gi|9247200|gb|AAB31933.2|/0/annexin II [Rattus sp.]
ENSRNOG00000007244	Derl2	3.20358	0.819337	K13989|1|2e-75|281|mmu:116891|Derlin-2/3	GO:0031227//intrinsic to endoplasmic reticulum membrane;GO:0031227//intrinsic to endoplasmic reticulum membrane	GO:0005488//binding;GO:0005488//binding	GO:0043161//proteasomal ubiquitin-dependent protein catabolic process;GO:0016049//cell growth;GO:0006886//intracellular protein transport;GO:0008283//cell proliferation;GO:0006950//response to stress;GO:0006984//ER-nucleus signaling pathway;GO:0043161//proteasomal ubiquitin-dependent protein catabolic process;GO:0016049//cell growth;GO:0006886//intracellular protein transport;GO:0008283//cell pro…	gi|74207243|dbj|BAE30810.1|/1.00457e-74/unnamed protein product [Mus musculus]
ENSRNOG00000020298	Bag3	-3.38932	0.882503	K09557|1|0.0|955|rno:293524|BCL2-associated athanogene 3	GO:0044444//cytoplasmic part	GO:0005488//binding	GO:0007417//central nervous system development;GO:0044267//cellular protein metabolic process;GO:0043066//negative regulation of apoptotic process	gi|58865450|ref|NP_001011936.1|/0/BAG family molecular chaperone regulator 3 [Rattus norvegicus]
ENSRNOG00000013992	Arfrp1	3.44275	0.823266	K07952|1|4e-114|411|rno:117051|ADP-ribosylation factor related protein 1	GO:0043231//intracellular membrane-bounded organelle	GO:0017111//nucleoside-triphosphatase activity;GO:0032561//guanyl ribonucleotide binding	GO:0035556//intracellular signal transduction;GO:0048598//embryonic morphogenesis;GO:0009207	gi|148675460|gb|EDL07407.1|/1.71284e-114/ADP-ribosylation factor related protein 1, isoform CRA_b [Mus musculus]
ENSRNOG00000001245	Pcbp3	-3.48601	0.810491	K13162|1|0.0|657|mmu:59093|poly(rC)-binding protein 2/3/4	GO:0044444//cytoplasmic part;GO:0032991//macromolecular complex;GO:0031981//nuclear lumen	GO:0003676//nucleic acid binding	GO:0016070//RNA metabolic process	gi|149043674|gb|EDL97125.1|/0/rCG61051, isoform CRA_a [Rattus norvegicus]
ENSRNOG00000010370	Tnip1	-3.63092	0.857313	K10352|1|7e-09|63.9|cin:100176948|myosin heavy chain;K06669|2|1e-08|63.2|xtr:100145671|structural maintenance of chromosome 3 (chondroitin sulfate proteoglycan 6)	GO:0044424//intracellular part	GO:0005488//binding	GO:0009100//glycoprotein metabolic process;GO:0045069//regulation of viral genome replication;GO:0006950//response to stress;GO:0010467//gene expression	gi|157818891|ref|NP_001102296.1|/0/TNFAIP3-interacting protein 1 [Rattus norvegicus]
ENSRNOG00000013591	Tmem9b	3.56239	0.825193	-	GO:0031224//intrinsic to membrane	GO:0060089	GO:0007249//I-kappaB kinase/NF-kappaB cascade	gi|149068339|gb|EDM17891.1|/8.43913e-79/TMEM9 domain family, member B (predicted), isoform CRA_b [Rattus norvegicus]
ENSRNOG00000009974	Coq3	-3.84905	0.869487	K00591|1|0.0|651|mmu:230027|hexaprenyldihydroxybenzoate methyltransferase [EC:2.1.1.114]	GO:0044429//mitochondrial part	GO:0030580//quinone cofactor methyltransferase activity;GO:0010420//polyprenyldihydroxybenzoate methyltransferase activity	GO:0019400;GO:0006743//ubiquinone metabolic process;GO:0006730//one-carbon metabolic process	gi|57015268|sp|Q63159.2|COQ3_RAT/0/RecName: Full=Hexaprenyldihydroxybenzoate methyltransferase, mitochondrial; AltName: Full=2-polyprenyl-6-hydroxyphenyl methylase; AltName: Full=3,4-dihydroxy-5-hexaprenylbenzoate methyltransferase; Short=DHHB methyltransferase; Short=DHHB-MT; Short=DHHB-MTase; AltName: Full=3-demethylubiquinone-9 3-methyltransferase; AltName: Full=Dihydroxyhexaprenylbenzoate met…
ENSRNOG00000018697	Abcb6	-3.62618	0.823108	K05661|1|0.0|1627|rno:140669|ATP-binding cassette, subfamily B (MDR/TAP), member 6	GO:0043234//protein complex;GO:0031306//intrinsic to mitochondrial outer membrane	GO:0032559;GO:0005506//iron ion binding;GO:0046915//transition metal ion transmembrane transporter activity;GO:0042626//ATPase activity, coupled to transmembrane movement of substances	GO:0015691//cadmium ion transport;GO:0051181//cofactor transport;GO:0006778//porphyrin-containing compound metabolic process;GO:0009207;GO:0009636//response to toxin;GO:0006875//cellular metal ion homeostasis	gi|18034785|ref|NP_542149.1|/0/ATP-binding cassette sub-family B member 6, mitochondrial [Rattus norvegicus]
ENSRNOG00000017163	Pfkp	-3.17134	0.80531	K00850|1|0.0|1436|rno:60416|6-phosphofructokinase [EC:2.7.1.11]	GO:0043234//protein complex;GO:0044444//cytoplasmic part	GO:0043169//cation binding;GO:0070061//fructose binding;GO:0008443//phosphofructokinase activity;GO:0032559	GO:0006007//glucose catabolic process;GO:0051260//protein homooligomerization;GO:0016310//phosphorylation;GO:0006000//fructose metabolic process	gi|57977273|ref|NP_996729.1|/0/6-phosphofructokinase type C [Rattus norvegicus]
ENSRNOG00000001344	ALDH2	-3.34321	0.877754	K00128|1|0.0|952|rno:29539|aldehyde dehydrogenase (NAD+) [EC:1.2.1.3]	GO:0044429//mitochondrial part	GO:0004030//aldehyde dehydrogenase [NAD(P)+] activity;GO:0005515//protein binding	GO:0044238//primary metabolic process;GO:0048545//response to steroid hormone stimulus;GO:0070542//response to fatty acid;GO:0042133//neurotransmitter metabolic process;GO:0006067//ethanol metabolic process;GO:0014070//response to organic cyclic compound;GO:0048513//organ development;GO:0002237//response to molecule of bacterial origin;GO:0006950//response to stress	gi|14192933|ref|NP_115792.1|/0/aldehyde dehydrogenase, mitochondrial precursor [Rattus norvegicus]
ENSRNOG00000010558	Ppif	-3.32346	0.857839	K09565|1|5e-95|348|rno:282819|peptidyl-prolyl isomerase F (cyclophilin D) [EC:5.2.1.8]	GO:0019866//organelle inner membrane;GO:0044429//mitochondrial part	GO:0008144//drug binding;GO:0016859//cis-trans isomerase activity	GO:0044267//cellular protein metabolic process;GO:0006915//apoptotic process;GO:0007006//mitochondrial membrane organization	gi|26892289|ref|NP_758443.1|/4.05671e-94/peptidyl-prolyl cis-trans isomerase F, mitochondrial precursor [Rattus norvegicus]
ENSRNOG00000001456	Nup153	-3.04506	0.821728	K14296|1|0.0|2321|rno:25281|nuclear pore complex protein Nup153	GO:0032991//macromolecular complex;GO:0031981//nuclear lumen;GO:0005635//nuclear envelope	GO:0017016//Ras GTPase binding;GO:0046914//transition metal ion binding	GO:0044238//primary metabolic process;GO:0015758//glucose transport;GO:0033036	gi|149045074|gb|EDL98160.1|/0/nucleoporin 153, isoform CRA_a [Rattus norvegicus]
ENSRNOG00000001339	PSMD9	-3.161	0.808058	K06693|1|2e-100|366|rno:161475|26S proteasome non-ATPase regulatory subunit 9	GO:0043231//intracellular membrane-bounded organelle;GO:0005838//proteasome regulatory particle	GO:0003712//transcription cofactor activity;GO:0008134//transcription factor binding	GO:0043161//proteasomal ubiquitin-dependent protein catabolic process;GO:0006357//regulation of transcription from RNA polymerase II promoter;GO:0050796//regulation of insulin secretion;GO:0051320//S phase;GO:0007050//cell cycle arrest;GO:0051439//regulation of ubiquitin-protein ligase activity involved in mitotic cell cycle;GO:0006520//cellular amino acid metabolic process;GO:0006915//apoptotic …	gi|149063326|gb|EDM13649.1|/7.37587e-100/proteasome (prosome, macropain) 26S subunit, non-ATPase, 9, isoform CRA_a [Rattus norvegicus]
ENSRNOG00000025310	Pop7	-3.15291	0.823845	K14527|1|7e-65|247|rno:288564|ribonuclease P/MRP protein subunit RPP20 [EC:3.1.26.5]	GO:0030681;GO:0031981//nuclear lumen	GO:0005488//binding;GO:0004549//tRNA-specific ribonuclease activity	GO:0006399//tRNA metabolic process	gi|157786892|ref|NP_001099388.1|/5.27804e-64/ribonuclease P protein subunit p20 [Rattus norvegicus]
ENSRNOG00000017977	Smpd1	-3.15446	0.838262	K12350|1|0.0|1255|rno:308909|sphingomyelin phosphodiesterase [EC:3.1.4.12]	GO:0000323//lytic vacuole;GO:0030141//secretory granule;GO:0044421//extracellular region part	GO:0004620//phospholipase activity	GO:0006684//sphingomyelin metabolic process;GO:0006915//apoptotic process;GO:0006672//ceramide metabolic process;GO:0014073	gi|55741778|ref|NP_001006998.1|/0/sphingomyelin phosphodiesterase [Rattus norvegicus]
ENSRNOG00000005053	Egln3	-3.8192	0.885147	K09592|1|0.0|706|rno:54702|hypoxia-inducible factor prolyl hydroxylase [EC:1.14.11.-]	GO:0043231//intracellular membrane-bounded organelle	GO:0046914//transition metal ion binding;GO:0019842//vitamin binding;GO:0016701//oxidoreductase activity, acting on single donors with incorporation of molecular oxygen	GO:0008283//cell proliferation;GO:0006950//response to stress;GO:0012501//programmed cell death;GO:0008152//metabolic process	gi|149051230|gb|EDM03403.1|/0/rCG62399 [Rattus norvegicus]
ENSRNOG00000000571	Psap	-3.28084	0.875985	K12382|1|0.0|1064|rno:25524|saposin	GO:0005764//lysosome;GO:0044421//extracellular region part	-	GO:0006643//membrane lipid metabolic process;GO:0040007//growth;GO:0006869//lipid transport;GO:0010627//regulation of intracellular protein kinase cascade;GO:0003006//developmental process involved in reproduction	gi|149038761|gb|EDL93050.1|/0/prosaposin, isoform CRA_a [Rattus norvegicus]
ENSRNOG00000011414	Psmc3	-3.14529	0.862157	K03065|1|0.0|887|ptr:451172|26S proteasome regulatory subunit T5	GO:0043231//intracellular membrane-bounded organelle;GO:0043234//protein complex;GO:0044444//cytoplasmic part	GO:0016462//pyrophosphatase activity;GO:0003712//transcription cofactor activity;GO:0032559	GO:0043161//proteasomal ubiquitin-dependent protein catabolic process;GO:0051320//S phase;GO:0007050//cell cycle arrest;GO:0016070//RNA metabolic process;GO:0051439//regulation of ubiquitin-protein ligase activity involved in mitotic cell cycle;GO:0006520//cellular amino acid metabolic process;GO:0006915//apoptotic process;GO:0030330//DNA damage response, signal transduction by p53 class mediator…	gi|74185161|dbj|BAE39181.1|/0/unnamed protein product [Mus musculus]
ENSRNOG00000003980	Ttc1	-3.40256	0.861062	K09527|1|8e-18|92.4|dre:100535346|DnaJ homolog subfamily C member 7	-	GO:0005515//protein binding	GO:0044267//cellular protein metabolic process	gi|53850588|ref|NP_001005529.1|/2.9575e-155/tetratricopeptide repeat protein 1 [Rattus norvegicus]
ENSRNOG00000011158	Ppp2r2a	-3.49761	0.867307	K04354|1|0.0|870|rno:117104|protein phosphatase 2 (formerly 2A), regulatory subunit B	GO:0008287//protein serine/threonine phosphatase complex	GO:0005488//binding;GO:0004721//phosphoprotein phosphatase activity;GO:0019888//protein phosphatase regulator activity	GO:0019222//regulation of metabolic process;GO:0014072;GO:0006464//cellular protein modification process;GO:0023052//signaling	gi|60360266|dbj|BAD90377.1|/0/mKIAA4213 protein [Mus musculus]
ENSRNOG00000048708	Exosc1	2.90056	0.808996	K07573|1|7e-109|392|rno:679140|exosome complex component CSL4	GO:0043234//protein complex;GO:0031981//nuclear lumen;GO:0044444//cytoplasmic part;GO:0043234//protein complex;GO:0031981//nuclear lumen	GO:0003676//nucleic acid binding;GO:0004527//exonuclease activity;GO:0004518//nuclease activity	GO:0000291//nuclear-transcribed mRNA catabolic process, exonucleolytic;GO:0042254//ribosome biogenesis;GO:0010467//gene expression;GO:0010467//gene expression;GO:0009987//cellular process	gi|354471140|ref|XP_003497801.1|/1.11998e-84/PREDICTED: exosome complex component CSL4-like isoform 2 [Cricetulus griseus]
ENSRNOG00000016866	Fhl2	-3.33445	0.87549	K14380|1|0.0|633|rno:63839|four and a half LIM domains protein 2	GO:0043231//intracellular membrane-bounded organelle;GO:0005856//cytoskeleton;GO:0031672//A band;GO:0005924//cell-substrate adherens junction;GO:0031674//I band	GO:0003712//transcription cofactor activity;GO:0046914//transition metal ion binding;GO:0035258//steroid hormone receptor binding	GO:0006629//lipid metabolic process;GO:0009719;GO:0006355//regulation of transcription, DNA-dependent;GO:0030518//intracellular steroid hormone receptor signaling pathway	gi|13928940|ref|NP_113865.1|/3.41926e-180/four and a half LIM domains protein 2 [Rattus norvegicus]
ENSRNOG00000014520	Ing1	2.96344	0.802266	K11346|1|8e-28|124|tad:TRIADDRAFT_50425|inhibitor of growth protein 4	GO:0043231//intracellular membrane-bounded organelle	GO:0046872//metal ion binding	GO:0008219//cell death;GO:0006355//regulation of transcription, DNA-dependent;GO:0006605//protein targeting	gi|84370364|ref|NP_001033680.1|/8.74791e-93/inhibitor of growth protein 1 [Rattus norvegicus]
ENSRNOG00000031651	-	3.41387	0.854891	-	-	-	-	gi|32264597|gb|AAP78745.1|/3.80201e-61/Ac1054 [Rattus norvegicus]
ENSRNOG00000014352	Smim12	2.98731	0.830953	-	GO:0031224//intrinsic to membrane	-	-	gi|451770396|ref|NP_001263412.1|/2.17181e-48/small integral membrane protein 12 [Rattus norvegicus]
ENSRNOG00000012957	Sh3glb1	-3.55017	0.880745	K11248|1|0.0|675|rno:292156|endophilin-B	GO:0032991//macromolecular complex;GO:0031966//mitochondrial membrane;GO:0012505//endomembrane system	GO:0030674//protein binding, bridging;GO:0019904//protein domain specific binding;GO:0042802//identical protein binding;GO:0008289//lipid binding;GO:0071617//lysophospholipid acyltransferase activity	GO:0006458//'de novo' protein folding;GO:0046394;GO:0030035//microspike assembly;GO:0023052//signaling;GO:0006917//induction of apoptosis;GO:0006644//phospholipid metabolic process;GO:0043066//negative regulation of apoptotic process	gi|50510503|dbj|BAD32237.1|/0/mKIAA0491 protein [Mus musculus]
ENSRNOG00000004479	Aurka	-3.37134	0.814114	K11481|1|0.0|804|rno:261730|aurora kinase A [EC:2.7.11.1]	GO:0005815//microtubule organizing center;GO:0043231//intracellular membrane-bounded organelle;GO:0000922//spindle pole	GO:0004672//protein kinase activity;GO:0019900//kinase binding;GO:0032559	GO:0043161//proteasomal ubiquitin-dependent protein catabolic process;GO:0010608//posttranscriptional regulation of gene expression;GO:0043627//response to estrogen stimulus;GO:0006796//phosphate-containing compound metabolic process;GO:0048017//inositol lipid-mediated signaling;GO:0000087//M phase of mitotic cell cycle;GO:0000226//microtubule cytoskeleton organization;GO:0006464//cellular protei…	gi|76253851|ref|NP_695208.2|/0/aurora kinase A [Rattus norvegicus]
ENSRNOG00000014779	Pdcd4	3.74316	0.819738	-	GO:0031981//nuclear lumen;GO:0044444//cytoplasmic part;GO:0031981//nuclear lumen;GO:0044444//cytoplasmic part	GO:0003676//nucleic acid binding;GO:0003676//nucleic acid binding	GO:0012501//programmed cell death;GO:0051726//regulation of cell cycle;GO:0043407//negative regulation of MAP kinase activity;GO:0007568//aging;GO:0012501//programmed cell death;GO:0051726//regulation of cell cycle;GO:0043407//negative regulation of MAP kinase activity;GO:0007568//aging	gi|148669763|gb|EDL01710.1|/0/programmed cell death 4, isoform CRA_a [Mus musculus]
ENSRNOG00000019813	Ppp4c	-3.35518	0.8404	K15423|1|0.0|636|mdo:100012739|serine/threonine-protein phosphatase 4 catalytic subunit [EC:3.1.3.16]	GO:0005815//microtubule organizing center;GO:0043231//intracellular membrane-bounded organelle;GO:0008287//protein serine/threonine phosphatase complex	GO:0043169//cation binding;GO:0004721//phosphoprotein phosphatase activity;GO:0004702//receptor signaling protein serine/threonine kinase activity	GO:0048646//anatomical structure formation involved in morphogenesis;GO:0006796//phosphate-containing compound metabolic process;GO:0007010//cytoskeleton organization;GO:0006464//cellular protein modification process	gi|440907053|gb|ELR57245.1|/0/Serine/threonine-protein phosphatase 4 catalytic subunit, partial [Bos grunniens mutus]
ENSRNOG00000015205	Cyb5a	3.33908	0.844096	K10226|1|6e-12|69.3|tgu:100222881|fatty acid desaturase 2 (delta-6 desaturase) [EC:1.14.19.-];K10595|2|1e-11|68.6|tad:TRIADDRAFT_56425|E3 ubiquitin-protein ligase HERC2 [EC:6.3.2.19]	GO:0031224//intrinsic to membrane;GO:0031966//mitochondrial membrane;GO:0031224//intrinsic to membrane;GO:0031966//mitochondrial membrane	GO:0015002//heme-copper terminal oxidase activity;GO:0016616//oxidoreductase activity, acting on the CH-OH group of donors, NAD or NADP as acceptor;GO:0016215;GO:0005515//protein binding;GO:0005506//iron ion binding;GO:0016616//oxidoreductase activity, acting on the CH-OH group of donors, NAD or NADP as acceptor;GO:0016215;GO:0005515//protein binding;GO:0005506//iron ion binding	GO:0010038//response to metal ion;GO:0032787//monocarboxylic acid metabolic process;GO:0006766//vitamin metabolic process;GO:0006091//generation of precursor metabolites and energy;GO:0051234//establishment of localization;GO:0010038//response to metal ion;GO:0032787//monocarboxylic acid metabolic process;GO:0006091//generation of precursor metabolites and energy;GO:0051234//establishment of loca…	gi|1613840|gb|AAB16807.1|/6.4197e-76/cytochrome b5 [Mesocricetus auratus]
ENSRNOG00000043288	SMIM13	3.23981	0.833133	-	-	-	-	gi|148709026|gb|EDL40972.1|/5.90635e-47/mCG10996 [Mus musculus]
ENSRNOG00000050932	Pfdn4	3.12886	0.840452	K09550|1|3e-58|223|rno:100366237|prefoldin subunit 4	GO:0043234//protein complex;GO:0044444//cytoplasmic part	GO:0005515//protein binding	GO:0051084//'de novo' posttranslational protein folding	gi|392339699|ref|XP_002726322.2|/3.39525e-57/PREDICTED: prefoldin subunit 4-like isoform 1 [Rattus norvegicus]
ENSRNOG00000002642	Ptges3	-2.77267	0.851658	K15730|1|9e-112|404|ssc:100155956|cytosolic prostaglandin-E synthase [EC:5.3.99.3]	GO:0044427//chromosomal part;GO:0044444//cytoplasmic part;GO:0030529//ribonucleoprotein complex	GO:0003964//RNA-directed DNA polymerase activity;GO:0016860//intramolecular oxidoreductase activity;GO:0005515//protein binding	GO:0006693//prostaglandin metabolic process;GO:0042026//protein refolding;GO:0006259//DNA metabolic process;GO:0009058//biosynthetic process;GO:0008544//epidermis development;GO:0005977//glycogen metabolic process;GO:0031958	gi|148692593|gb|EDL24540.1|/3.04509e-123/prostaglandin E synthase 3 (cytosolic), isoform CRA_b [Mus musculus]
ENSRNOG00000029726	Gstm1	-2.62528	0.841295	K00799|1|2e-126|452|rno:24423|glutathione S-transferase [EC:2.5.1.18]	GO:0044424//intracellular part	GO:0042802//identical protein binding;GO:0008289//lipid binding;GO:0016765//transferase activity, transferring alkyl or aryl (other than methyl) groups	GO:0006790//sulfur compound metabolic process;GO:0007606//sensory perception of chemical stimulus;GO:0001101//response to acid;GO:0010038//response to metal ion	gi|149025664|gb|EDL81907.1|/1.78467e-126/rCG29047, isoform CRA_b [Rattus norvegicus]
ENSRNOG00000005538	Psmd11	-3.31559	0.863463	K03036|1|0.0|746|rno:303353|26S proteasome regulatory subunit N6	GO:0043234//protein complex	GO:0005488//binding	GO:0043161//proteasomal ubiquitin-dependent protein catabolic process;GO:0051320//S phase;GO:0007050//cell cycle arrest;GO:0016070//RNA metabolic process;GO:0051439//regulation of ubiquitin-protein ligase activity involved in mitotic cell cycle;GO:0006520//cellular amino acid metabolic process;GO:0006915//apoptotic process;GO:0030330//DNA damage response, signal transduction by p53 class mediator	gi|157820107|ref|NP_001100497.1|/0/26S proteasome non-ATPase regulatory subunit 11 [Rattus norvegicus]
ENSRNOG00000030408	Dnajb12	-3.78869	0.841642	K09518|1|0.0|664|rno:294513|DnaJ homolog subfamily B member 12	GO:0031224//intrinsic to membrane;GO:0043231//intracellular membrane-bounded organelle	GO:0005515//protein binding	GO:0044267//cellular protein metabolic process	gi|344274603|ref|XP_003409104.1|/0/PREDICTED: dnaJ homolog subfamily B member 12-like [Loxodonta africana]
ENSRNOG00000050051	Pin4	-3.22717	0.851647	K09579|1|8e-57|219|pon:100432587|peptidyl-prolyl cis-trans isomerase NIMA-interacting 4 [EC:5.2.1.8]	GO:0030529//ribonucleoprotein complex;GO:0044429//mitochondrial part;GO:0031981//nuclear lumen;GO:0015630//microtubule cytoskeleton	GO:0016859//cis-trans isomerase activity;GO:0043566//structure-specific DNA binding	GO:0042254//ribosome biogenesis;GO:0044267//cellular protein metabolic process	gi|426396404|ref|XP_004064434.1|/8.36391e-56/PREDICTED: peptidyl-prolyl cis-trans isomerase NIMA-interacting 4 isoform 1 [Gorilla gorilla gorilla]
ENSRNOG00000046799	Phb	-2.75337	0.857523	K09655|1|3e-08|60.8|cfa:491067|beta-1,4-N-acetylgalactosaminyltransferase 2 [EC:2.4.1.-]	GO:0031981//nuclear lumen;GO:0005743//mitochondrial inner membrane;GO:0016021//integral to membrane;GO:0031312	GO:0043565//sequence-specific DNA binding;GO:0019899//enzyme binding	GO:0000122//negative regulation of transcription from RNA polymerase II promoter;GO:0006476//protein deacetylation;GO:0033144//negative regulation of intracellular steroid hormone receptor signaling pathway;GO:0008283//cell proliferation;GO:0006259//DNA metabolic process;GO:0006915//apoptotic process;GO:0009887//organ morphogenesis;GO:0009725//response to hormone stimulus;GO:0031958	gi|6679299|ref|NP_032857.1|/4.97985e-131/prohibitin [Mus musculus]
ENSRNOG00000029042	MT-ND6	-4.94206	0.947986	K03884|1|8e-81|299|rno:26203|NADH-ubiquinone oxidoreductase chain 6 [EC:1.6.5.3]	GO:0031224//intrinsic to membrane;GO:0043231//intracellular membrane-bounded organelle	GO:0050136//NADH dehydrogenase (quinone) activity	GO:0008152//metabolic process	gi|110189726|ref|YP_665640.1|/5.27255e-80/NADH dehydrogenase subunit 6 [Rattus norvegicus]
ENSRNOG00000011797	Mocs2	-3.48143	0.826551	K03635|1|3e-110|399|rno:294753|molybdopterin synthase catalytic subunit [EC:2.-.-.-]	GO:0043234//protein complex;GO:0044444//cytoplasmic part	GO:0005515//protein binding;GO:0003824//catalytic activity	GO:0006766//vitamin metabolic process;GO:0009108//coenzyme biosynthetic process;GO:0042559//pteridine-containing compound biosynthetic process	gi|56090313|ref|NP_001007634.1|/2.77854e-109/molybdopterin synthase catalytic subunit isoform Mocs2B [Rattus norvegicus]
ENSRNOG00000014927	Zcchc9	3.07183	0.817716	K13199|1|2e-12|74.7|hmg:100212542|plasminogen activator inhibitor 1 RNA-binding protein;K13982|2|7e-11|69.3|spu:576055|probable ATP-dependent RNA helicase DDX4 [EC:3.6.4.13];K09250|5|8e-10|65.9|spu:581822|cellular nucleic acid-binding protein	-	GO:0046914//transition metal ion binding	-	gi|61557124|ref|NP_001013174.1|/3.40153e-143/zinc finger CCHC domain-containing protein 9 [Rattus norvegicus]
ENSRNOG00000026493	Cdnf	2.8521	0.817421	K13190|1|3e-46|184|gga:770664|RNA-binding protein 15	-	GO:0005102//receptor binding	-	gi|82830401|ref|NP_001032632.1|/1.16754e-105/cerebral dopamine neurotrophic factor precursor [Rattus norvegicus]
ENSRNOG00000011384	Aimp1	-3.1027	0.856376	K15437|1|3e-144|511|rno:114632|aminoacyl tRNA synthase complex-interacting multifunctional protein 1	GO:0043231//intracellular membrane-bounded organelle;GO:0031410//cytoplasmic vesicle;GO:0043234//protein complex;GO:0044421//extracellular region part	GO:0005102//receptor binding;GO:0042802//identical protein binding;GO:0003723//RNA binding	GO:0001525//angiogenesis;GO:0042221//response to chemical stimulus;GO:0012501//programmed cell death;GO:0006412//translation;GO:0001935//endothelial cell proliferation;GO:0023052//signaling;GO:0007154//cell communication;GO:0002252;GO:0019318//hexose metabolic process;GO:0006952//defense response	gi|75832035|ref|NP_446209.1|/2.17e-143/aminoacyl tRNA synthase complex-interacting multifunctional protein 1 [Rattus norvegicus]
ENSRNOG00000007775	Cmpk1	-3.29232	0.829047	K13800|1|9e-129|461|rno:298410|UMP-CMP kinase [EC:2.7.4.- 2.7.4.14]	GO:0043231//intracellular membrane-bounded organelle;GO:0044444//cytoplasmic part	GO:0016776//phosphotransferase activity, phosphate group as acceptor;GO:0019201//nucleotide kinase activity;GO:0032559;GO:0019206//nucleoside kinase activity	GO:0009123;GO:0006221//pyrimidine nucleotide biosynthetic process;GO:0006796//phosphate-containing compound metabolic process	gi|71043752|ref|NP_001020826.1|/7.20711e-128/UMP-CMP kinase [Rattus norvegicus]
ENSRNOG00000017801	Atf4	-1.55363	0.815367	K04374|1|5e-169|594|rno:79255|activating transcription factor 4	GO:0043231//intracellular membrane-bounded organelle;GO:0043234//protein complex;GO:0032589//neuron projection membrane	GO:0001071//nucleic acid binding transcription factor activity;GO:0003677//DNA binding;GO:0005515//protein binding	GO:0019752//carboxylic acid metabolic process;GO:0006357//regulation of transcription from RNA polymerase II promoter;GO:0007186//G-protein coupled receptor signaling pathway;GO:0033554//cellular response to stress;GO:0006006//glucose metabolic process	gi|13242322|ref|NP_077379.1|/3.85357e-168/cyclic AMP-dependent transcription factor ATF-4 [Rattus norvegicus]
ENSRNOG00000022609	Mrps10	2.41555	0.821444	-	GO:0005856//cytoskeleton;GO:0000314//organellar small ribosomal subunit;GO:0043231//intracellular membrane-bounded organelle	GO:0005198//structural molecule activity	GO:0010467//gene expression	gi|57012444|ref|NP_001008859.1|/2.49244e-76/28S ribosomal protein S10, mitochondrial [Rattus norvegicus]
ENSRNOG00000002010	Mrps6	2.45346	0.837514	-	GO:0043231//intracellular membrane-bounded organelle;GO:0030529//ribonucleoprotein complex	GO:0003723//RNA binding;GO:0005198//structural molecule activity	GO:0010467//gene expression	gi|392351935|ref|XP_002727920.2|/2.57877e-65/PREDICTED: uncharacterized protein LOC100360017 [Rattus norvegicus]
ENSRNOG00000018023	Bin3	3.60991	0.807332	K12562|1|9e-11|68.9|der:Dere_GG20319|amphiphysin	GO:0043232	GO:0030674//protein binding, bridging	GO:0000902//cell morphogenesis;GO:0033036;GO:0032506;GO:0030036//actin cytoskeleton organization	gi|61557221|ref|NP_001013204.1|/3.67433e-137/bridging integrator 3 [Rattus norvegicus]
ENSRNOG00000016269	Rpl7l1	2.99137	0.829932	K02937|1|5e-48|191|ptr:464232|large subunit ribosomal protein L7e	GO:0030529//ribonucleoprotein complex	GO:0005488//binding;GO:0005198//structural molecule activity	GO:0010467//gene expression	gi|149069422|gb|EDM18863.1|/6.74468e-121/rCG43676, isoform CRA_a [Rattus norvegicus]
ENSRNOG00000011419	Aldh6a1	-2.89304	0.862736	K00140|1|0.0|1005|rno:81708|malonate-semialdehyde dehydrogenase (acetylating) / methylmalonate-semialdehyde dehydrogenase [EC:1.2.1.18 1.2.1.27]	GO:0031981//nuclear lumen	GO:0016788//hydrolase activity, acting on ester bonds;GO:0016620//oxidoreductase activity, acting on the aldehyde or oxo group of donors, NAD or NADP as acceptor;GO:0005504//fatty acid binding	GO:0006573//valine metabolic process;GO:0009063//cellular amino acid catabolic process;GO:0006208//pyrimidine nucleobase catabolic process;GO:0045444//fat cell differentiation	gi|145651820|ref|NP_112319.2|/0/methylmalonate-semialdehyde dehydrogenase [acylating], mitochondrial precursor [Rattus norvegicus]
ENSRNOG00000018704	Nolc1	-3.88448	0.869508	-	GO:0016604//nuclear body	GO:0005515//protein binding;GO:0001071//nucleic acid binding transcription factor activity;GO:0030515//snoRNA binding;GO:0005048//signal sequence binding	GO:0006355//regulation of transcription, DNA-dependent;GO:0008283//cell proliferation;GO:0016074//snoRNA metabolic process;GO:0006997//nucleus organization;GO:0006950//response to stress;GO:0006606//protein import into nucleus	gi|205752|gb|AAA41719.1|/3.56463e-79/Nopp140 [Rattus norvegicus]
ENSRNOG00000015077	Acsf3	-3.51487	0.823371	K01896|1|1e-32|141|gga:426992|medium-chain acyl-CoA synthetase [EC:6.2.1.2]	GO:0043231//intracellular membrane-bounded organelle	GO:0016877//ligase activity, forming carbon-sulfur bonds;GO:0032559	GO:0032787//monocarboxylic acid metabolic process;GO:0044238//primary metabolic process	gi|149038409|gb|EDL92769.1|/0/similar to C50H11.1, isoform CRA_a [Rattus norvegicus]
ENSRNOG00000047115	Cox16	3.35677	0.827067	-	GO:0005740//mitochondrial envelope;GO:0031224//intrinsic to membrane	-	-	gi|344235739|gb|EGV91842.1|/1.70652e-51/Cytochrome c oxidase assembly protein COX16-like, mitochondrial [Cricetulus griseus]
ENSRNOG00000019936	Anapc15	3.63349	0.830606	-	GO:0044464//cell part	-	-	gi|149068701|gb|EDM18253.1|/1.41131e-42/rCG39469 [Rattus norvegicus]
ENSRNOG00000025338	Msi2	2.12449	0.812808	K14411|1|2e-35|148|ecb:100070744|RNA-binding protein Musashi	GO:0030529//ribonucleoprotein complex;GO:0030529//ribonucleoprotein complex;GO:0030529//ribonucleoprotein complex	GO:0008187//poly-pyrimidine tract binding;GO:0008187//poly-pyrimidine tract binding;GO:0008187//poly-pyrimidine tract binding	GO:0048468//cell development;GO:0048468//cell development;GO:0048468//cell development	gi|392351488|ref|XP_340877.5|/2.27648e-170/PREDICTED: RNA-binding protein Musashi homolog 2-like [Rattus norvegicus]
ENSRNOG00000003919	Rps6kb1	-3.70856	0.822602	K04688|1|0.0|1051|rno:83840|p70 ribosomal S6 kinase [EC:2.7.11.1]	GO:0030529//ribonucleoprotein complex;GO:0031966//mitochondrial membrane;GO:0044459//plasma membrane part	GO:0004674//protein serine/threonine kinase activity;GO:0032559	GO:0006915//apoptotic process;GO:0014874;GO:0007346//regulation of mitotic cell cycle;GO:0008284//positive regulation of cell proliferation;GO:0048017//inositol lipid-mediated signaling;GO:0043434//response to peptide hormone stimulus;GO:0003006//developmental process involved in reproduction;GO:0007169//transmembrane receptor protein tyrosine kinase signaling pathway;GO:0007243//intracellular pr…	gi|54041073|sp|P67999.1|KS6B1_RAT/0/RecName: Full=Ribosomal protein S6 kinase beta-1; Short=S6K-beta-1; Short=S6K1; AltName: Full=70 kDa ribosomal protein S6 kinase 1; Short=P70S6K1; Short=p70-S6K 1; AltName: Full=Ribosomal protein S6 kinase I; AltName: Full=p70 ribosomal S6 kinase alpha; Short=p70 S6 kinase alpha; Short=p70 S6K-alpha; Short=p70 S6KA
ENSRNOG00000020347	Nup98	-3.43748	0.805657	K14297|1|0.0|1439|rno:81738|nuclear pore complex protein Nup98-Nup96	GO:0005643//nuclear pore;GO:0000775//chromosome, centromeric region;GO:0031981//nuclear lumen;GO:0031981//nuclear lumen;GO:0005643//nuclear pore;GO:0000775//chromosome, centromeric region;GO:0044444//cytoplasmic part	GO:0005488//binding;GO:0005488//binding;GO:0005198//structural molecule activity	GO:0006259//DNA metabolic process;GO:0006259//DNA metabolic process;GO:0050658//RNA transport;GO:0051704;GO:0006606//protein import into nucleus;GO:0015758//glucose transport;GO:0007067//mitosis;GO:0006997//nucleus organization	gi|148684636|gb|EDL16583.1|/0/nucleoporin 98, isoform CRA_b [Mus musculus]
ENSRNOG00000049110	Dpm2	2.83539	0.814535	K09658|1|5e-28|125|rno:29640|dolichyl-phosphate mannosyltransferase polypeptide 2, regulatory subunit	GO:0031224//intrinsic to membrane;GO:0031501//mannosyltransferase complex;GO:0005789//endoplasmic reticulum membrane	GO:0005488//binding;GO:0000030//mannosyltransferase activity	GO:0010608//posttranscriptional regulation of gene expression;GO:0006506//GPI anchor biosynthetic process;GO:0016093;GO:0006493//protein O-linked glycosylation;GO:0006487//protein N-linked glycosylation	gi|149039009|gb|EDL93229.1|/1.58138e-34/dolichol-phosphate (beta-D) mannosyltransferase 2 [Rattus norvegicus]
ENSRNOG00000037087	-	2.96306	0.829574	-	-	-	-	gi|57281881|emb|CAC82512.1|/6.31899e-48/92Aa-Protein [Rattus norvegicus]
ENSRNOG00000000658	Acacb	-3.18198	0.806879	K11262|1|0.0|4468|rno:116719|acetyl-CoA carboxylase / biotin carboxylase [EC:6.4.1.2 6.3.4.14]	GO:0043231//intracellular membrane-bounded organelle;GO:0044444//cytoplasmic part;GO:0043231//intracellular membrane-bounded organelle;GO:0044444//cytoplasmic part	GO:0019842//vitamin binding;GO:0043169//cation binding;GO:0016879//ligase activity, forming carbon-nitrogen bonds;GO:0016421//CoA carboxylase activity;GO:0032559;GO:0019842//vitamin binding;GO:0043169//cation binding;GO:0016879//ligase activity, forming carbon-nitrogen bonds;GO:0016421//CoA carboxylase activity;GO:0032559	GO:0009893//positive regulation of metabolic process;GO:0051260//protein homooligomerization;GO:0003333//amino acid transmembrane transport;GO:0019217//regulation of fatty acid metabolic process;GO:0006732//coenzyme metabolic process;GO:0015980//energy derivation by oxidation of organic compounds;GO:0010033//response to organic substance;GO:0009893//positive regulation of metabolic process;GO:005…	gi|94963134|gb|ABF48724.1|/0/acetyl-Coenzyme A carboxylase 2 [Rattus norvegicus]
ENSRNOG00000009536	Pgp	-3.39253	0.846718	K01091|1|9e-175|614|rno:287115|phosphoglycolate phosphatase [EC:3.1.3.18]	-	GO:0016791//phosphatase activity	GO:0044238//primary metabolic process;GO:0006796//phosphate-containing compound metabolic process	gi|281332119|ref|NP_001162623.1|/7.45736e-174/phosphoglycolate phosphatase [Rattus norvegicus]
ENSRNOG00000017307	Prss23	-3.62823	0.88105	K09627|1|0.0|777|rno:308807|protease, serine, 23 [EC:3.4.21.-]	GO:0043231//intracellular membrane-bounded organelle	GO:0004175//endopeptidase activity	GO:0019538//protein metabolic process	gi|56090287|ref|NP_001007692.1|/0/serine protease 23 precursor [Rattus norvegicus]
ENSRNOG00000017622	Npm3	3.02747	0.823044	K11278|1|2e-74|277|rno:502389|nucleophosmin 3	GO:0031981//nuclear lumen	GO:0005488//binding	GO:0006351//transcription, DNA-dependent;GO:0042254//ribosome biogenesis	gi|109460217|ref|XP_577868.2|/1.67568e-73/PREDICTED: nucleoplasmin-3-like [Rattus norvegicus]
ENSRNOG00000011932	Snrpa1	2.89587	0.805489	K11092|1|4e-81|300|ecb:100050337|U2 small nuclear ribonucleoprotein A'	GO:0005681//spliceosomal complex;GO:0030532//small nuclear ribonucleoprotein complex;GO:0031981//nuclear lumen;GO:0005681//spliceosomal complex;GO:0030532//small nuclear ribonucleoprotein complex;GO:0031981//nuclear lumen	GO:0003676//nucleic acid binding;GO:0003676//nucleic acid binding	GO:0000377;GO:0000377	gi|404501484|ref|NP_001258252.1|/1.85721e-139/small nuclear ribonucleoprotein polypeptide A' [Rattus norvegicus]
ENSRNOG00000043094	Oxct1	-4.4892	0.92625	K01027|1|0.0|996|rno:690163|3-oxoacid CoA-transferase [EC:2.8.3.5]	GO:0044429//mitochondrial part	GO:0008410//CoA-transferase activity;GO:0042802//identical protein binding	GO:0007417//central nervous system development;GO:0050796//regulation of insulin secretion;GO:0006629//lipid metabolic process;GO:0009888//tissue development;GO:0044248//cellular catabolic process;GO:0001101//response to acid;GO:0009719;GO:0031667//response to nutrient levels;GO:0001678//cellular glucose homeostasis;GO:0048513//organ development;GO:0006950//response to stress;GO:0010033//response…	gi|189181716|ref|NP_001121052.1|/0/succinyl-CoA:3-ketoacid coenzyme A transferase 1, mitochondrial precursor [Rattus norvegicus]
ENSRNOG00000023150	Gpi	-3.67457	0.890644	K01810|1|0.0|1140|rno:292804|glucose-6-phosphate isomerase [EC:5.3.1.9]	GO:0031981//nuclear lumen;GO:0016020//membrane;GO:0044421//extracellular region part;GO:0044444//cytoplasmic part	GO:0005102//receptor binding;GO:0016861//intramolecular oxidoreductase activity, interconverting aldoses and ketoses	GO:0006007//glucose catabolic process;GO:0006955//immune response;GO:0007610//behavior;GO:0009438//methylglyoxal metabolic process;GO:0050878//regulation of body fluid levels;GO:0048646//anatomical structure formation involved in morphogenesis;GO:0043066//negative regulation of apoptotic process;GO:0010466//negative regulation of peptidase activity	gi|46485440|ref|NP_997475.1|/0/glucose-6-phosphate isomerase [Rattus norvegicus]
ENSRNOG00000011976	Nudt7	-3.07618	0.808585	K01529|1|4e-15|82.8|mmu:66387|[EC:3.6.1.-]	GO:0042579//microbody	GO:0046914//transition metal ion binding;GO:0016817//hydrolase activity, acting on acid anhydrides;GO:0016289//CoA hydrolase activity	GO:0009117//nucleotide metabolic process;GO:0006084//acetyl-CoA metabolic process;GO:0009109;GO:0045444//fat cell differentiation	gi|149038257|gb|EDL92617.1|/7.02766e-136/nudix (nucleoside diphosphate linked moiety X)-type motif 7 (predicted), isoform CRA_d [Rattus norvegicus]
ENSRNOG00000016151	Ankrd23	-3.10211	0.849214	K15503|1|3e-23|111|rno:301415|serine/threonine-protein phosphatase 6 regulatory ankyrin repeat subunit B	GO:0030017//sarcomere;GO:0043231//intracellular membrane-bounded organelle	-	GO:0032787//monocarboxylic acid metabolic process	gi|157817264|ref|NP_001101681.1|/2.28146e-154/ankyrin repeat domain-containing protein 23 [Rattus norvegicus]
ENSRNOG00000048812	Gpx1	-3.33082	0.877017	K00432|1|2e-113|408|rno:24404|glutathione peroxidase [EC:1.11.1.9]	GO:0043231//intracellular membrane-bounded organelle;GO:0044444//cytoplasmic part	GO:0004601//peroxidase activity;GO:0016705//oxidoreductase activity, acting on paired donors, with incorporation or reduction of molecular oxygen;GO:0061135;GO:0042277//peptide binding;GO:0019904//protein domain specific binding	GO:0019725//cellular homeostasis;GO:0010468//regulation of gene expression;GO:0010466//negative regulation of peptidase activity;GO:0006639//acylglycerol metabolic process;GO:0002064//epithelial cell development;GO:0048871//multicellular organismal homeostasis;GO:0009608//response to symbiont;GO:0050954//sensory perception of mechanical stimulus;GO:0002437//inflammatory response to antigenic stim…	gi|145275165|ref|NP_110453.3|/1.80097e-112/glutathione peroxidase 1 [Rattus norvegicus]
ENSRNOG00000005362	Rab3ip	-3.51383	0.843201	-	GO:0005815//microtubule organizing center;GO:0043231//intracellular membrane-bounded organelle	GO:0030695//GTPase regulator activity;GO:0019899//enzyme binding	GO:0006892//post-Golgi vesicle-mediated transport;GO:0019222//regulation of metabolic process;GO:0010927;GO:0034613//cellular protein localization	gi|120474981|ref|NP_059009.2|/0/rab-3A-interacting protein [Rattus norvegicus]
ENSRNOG00000013741	Ube2d3	-2.53616	0.853795	K06689|1|2e-83|311|ssc:780418|ubiquitin-conjugating enzyme E2 D/E [EC:6.3.2.19]	GO:0043231//intracellular membrane-bounded organelle;GO:0031090//organelle membrane	GO:0019787//small conjugating protein ligase activity;GO:0032559	GO:0012501//programmed cell death;GO:0006511//ubiquitin-dependent protein catabolic process;GO:0006259//DNA metabolic process;GO:0000209//protein polyubiquitination;GO:0033554//cellular response to stress;GO:0001818//negative regulation of cytokine production;GO:0007178//transmembrane receptor protein serine/threonine kinase signaling pathway	gi|118403848|ref|NP_001072141.1|/1.2325e-82/ubiquitin-conjugating enzyme E2 D2 [Sus scrofa]
ENSRNOG00000039871	RGD1306063	1.94155	0.810123	-	-	-	-	gi|157822641|ref|NP_001099496.1|/6.78211e-66/uncharacterized protein LOC289928 [Rattus norvegicus]
ENSRNOG00000013493	Psma4	-3.37034	0.874542	K02728|1|8e-124|444|tgu:100190079|20S proteasome subunit alpha 3 [EC:3.4.25.1]	GO:0043231//intracellular membrane-bounded organelle;GO:0005839//proteasome core complex	GO:0004175//endopeptidase activity;GO:0005515//protein binding	GO:0043161//proteasomal ubiquitin-dependent protein catabolic process;GO:0051320//S phase;GO:0007050//cell cycle arrest;GO:0016070//RNA metabolic process;GO:0051439//regulation of ubiquitin-protein ligase activity involved in mitotic cell cycle;GO:0006520//cellular amino acid metabolic process;GO:0006915//apoptotic process;GO:0030330//DNA damage response, signal transduction by p53 class mediator…	gi|449281518|gb|EMC88575.1|/6.25179e-123/Proteasome subunit alpha type-4 [Columba livia]
ENSRNOG00000019976	Spata24	3.24062	0.801161	-	GO:0031981//nuclear lumen;GO:0031981//nuclear lumen	GO:0003676//nucleic acid binding;GO:0003676//nucleic acid binding	GO:0048869//cellular developmental process;GO:0048232//male gamete generation;GO:0006351//transcription, DNA-dependent;GO:0048869//cellular developmental process;GO:0048232//male gamete generation;GO:0006351//transcription, DNA-dependent	gi|348041294|ref|NP_001020807.2|/1.83342e-86/spermatogenesis-associated protein 24 [Rattus norvegicus]
ENSRNOG00000009628	Pfkm	-3.69781	0.886579	K00850|1|0.0|1534|mmu:18642|6-phosphofructokinase [EC:2.7.1.11]	GO:0043234//protein complex;GO:0044459//plasma membrane part;GO:0044444//cytoplasmic part	GO:0032559;GO:0008443//phosphofructokinase activity;GO:0043169//cation binding;GO:0070061//fructose binding;GO:0019899//enzyme binding	GO:0006007//glucose catabolic process;GO:0006000//fructose metabolic process;GO:0016310//phosphorylation;GO:0050796//regulation of insulin secretion;GO:0019725//cellular homeostasis;GO:0051260//protein homooligomerization;GO:0042593//glucose homeostasis	gi|62825891|gb|AAH94212.1|/0/Phosphofructokinase, muscle [Rattus norvegicus]
ENSRNOG00000001068	Rac1	-3.42833	0.86736	K04392|1|7e-99|360|ssc:100627149|Ras-related C3 botulinum toxin substrate 1	GO:0030427//site of polarized growth;GO:0019898//extrinsic to membrane;GO:0031252//cell leading edge;GO:0005884//actin filament;GO:0012505//endomembrane system;GO:0048770;GO:0044297//cell body	GO:0019900//kinase binding;GO:0032561//guanyl ribonucleotide binding;GO:0017111//nucleoside-triphosphatase activity;GO:0005083//small GTPase regulator activity	GO:0021843;GO:0050688//regulation of defense response to virus;GO:0051641//cellular localization;GO:0001894//tissue homeostasis;GO:0009966//regulation of signal transduction;GO:0007169//transmembrane receptor protein tyrosine kinase signaling pathway;GO:0031175//neuron projection development;GO:0035567//non-canonical Wnt receptor signaling pathway;GO:0009207;GO:0006970//response to osmotic stress…	gi|147906150|ref|NP_001089332.1|/5.0421e-98/ras-related C3 botulinum toxin substrate 1 (rho family, small GTP binding protein Rac1) [Xenopus laevis]
ENSRNOG00000050675	Myl4	3.70324	0.828931	K12750|1|1e-89|329|rno:688228|myosin light chain 4	GO:0015629//actin cytoskeleton;GO:0030017//sarcomere	GO:0017111//nucleoside-triphosphatase activity;GO:0046872//metal ion binding;GO:0003779//actin binding	GO:0006941//striated muscle contraction;GO:0008016//regulation of heart contraction;GO:0043462//regulation of ATPase activity	gi|127140|sp|P17209.2|MYL4_RAT/9.53107e-89/RecName: Full=Myosin light chain 4; AltName: Full=Myosin light chain 1, atrial isoform
ENSRNOG00000047501	-	2.7459	0.836819	-	-	-	-	-
ENSRNOG00000003330	Acsf2	-2.87048	0.854132	K00666|1|0.0|1238|rno:619561|fatty-acyl-CoA synthase [EC:6.2.1.-]	GO:0043231//intracellular membrane-bounded organelle	GO:0003824//catalytic activity;GO:0032559	GO:0032787//monocarboxylic acid metabolic process;GO:0044238//primary metabolic process	gi|77993368|ref|NP_001030123.1|/0/acyl-CoA synthetase family member 2, mitochondrial precursor [Rattus norvegicus]
ENSRNOG00000017878	Aldh1a7	-4.92459	0.823129	K00128|1|0.0|773|rno:29651|aldehyde dehydrogenase (NAD+) [EC:1.2.1.3];K07249|2|0.0|748|mmu:26358|retinal dehydrogenase [EC:1.2.1.36]	GO:0044444//cytoplasmic part	GO:0019115//benzaldehyde dehydrogenase activity;GO:0004030//aldehyde dehydrogenase [NAD(P)+] activity;GO:0005515//protein binding	GO:0048562//embryonic organ morphogenesis;GO:0033189//response to vitamin A;GO:0007612//learning;GO:0043627//response to estrogen stimulus;GO:0022602//ovulation cycle process;GO:0006915//apoptotic process;GO:0035238//vitamin A biosynthetic process;GO:0048565//digestive tract development;GO:0016331//morphogenesis of embryonic epithelium;GO:0006950//response to stress;GO:0051260//protein homooligom…	gi|14485281|ref|NP_058968.14|/0/aldehyde dehydrogenase, cytosolic 1 [Rattus norvegicus]
ENSRNOG00000024577	Gamt	-2.77092	0.80492	K00542|1|2e-136|485|rno:25257|guanidinoacetate N-methyltransferase [EC:2.1.1.2]	GO:0044444//cytoplasmic part	GO:0042802//identical protein binding;GO:0008757//S-adenosylmethionine-dependent methyltransferase activity	GO:0006790//sulfur compound metabolic process;GO:0003012//muscle system process;GO:0035264//multicellular organism growth;GO:0006730//one-carbon metabolic process;GO:0048232//male gamete generation;GO:0006600//creatine metabolic process;GO:0009653//anatomical structure morphogenesis	gi|403310680|ref|NP_036925.2|/3.58727e-136/guanidinoacetate N-methyltransferase [Rattus norvegicus]
ENSRNOG00000007284	Slc2a1	-3.55524	0.837714	K07299|1|0.0|899|rno:24778|MFS transporter, SP family, solute carrier family 2 (facilitated glucose transporter), member 1	GO:0030054//cell junction;GO:0016021//integral to membrane;GO:0045120//pronucleus;GO:0048770	GO:0005402//cation:sugar symporter activity;GO:0005355//glucose transmembrane transporter activity;GO:0051183//vitamin transporter activity;GO:0019899//enzyme binding	GO:0044238//primary metabolic process;GO:0009267//cellular response to starvation;GO:0006766//vitamin metabolic process;GO:0015758//glucose transport;GO:0030073//insulin secretion;GO:0015980//energy derivation by oxidation of organic compounds;GO:0051180//vitamin transport	gi|20301952|ref|NP_620182.1|/0/solute carrier family 2, facilitated glucose transporter member 1 [Rattus norvegicus]
ENSRNOG00000023520	Cs	-3.21004	0.875258	K01647|1|0.0|912|rno:170587|citrate synthase [EC:2.3.3.1]	GO:0044429//mitochondrial part	GO:0046912//transferase activity, transferring acyl groups, acyl groups converted into alkyl on transfer	GO:0009060//aerobic respiration;GO:0005975//carbohydrate metabolic process;GO:0072350;GO:0006732//coenzyme metabolic process;GO:0043648//dicarboxylic acid metabolic process	gi|149029697|gb|EDL84868.1|/0/rCG42519, isoform CRA_a [Rattus norvegicus]
ENSRNOG00000008802	Dnajc11	-3.4485	0.816294	K09531|1|0.0|1065|rno:362666|DnaJ homolog subfamily C member 11	GO:0019866//organelle inner membrane;GO:0043231//intracellular membrane-bounded organelle	GO:0005515//protein binding	GO:0044267//cellular protein metabolic process	gi|157822779|ref|NP_001102164.1|/0/dnaJ homolog subfamily C member 11 [Rattus norvegicus]
ENSRNOG00000021403	Rhob	2.40063	0.822297	K07856|1|1e-111|402|ecb:100056328|Ras homolog gene family, member B	GO:0005770//late endosome;GO:0031090//organelle membrane	GO:0032561//guanyl ribonucleotide binding;GO:0017111//nucleoside-triphosphatase activity	GO:0007265//Ras protein signal transduction;GO:0007599//hemostasis;GO:0009207;GO:0007041//lysosomal transport;GO:0051726//regulation of cell cycle;GO:0006915//apoptotic process;GO:0009966//regulation of signal transduction;GO:0048869//cellular developmental process;GO:0006935//chemotaxis;GO:0045765//regulation of angiogenesis;GO:0001775//cell activation	gi|440906071|gb|ELR56376.1|/8.11795e-111/Rho-related GTP-binding protein RhoB, partial [Bos grunniens mutus]
ENSRNOG00000008845	Pdrg1	-3.59201	0.85587	-	GO:0044424//intracellular part;GO:0043234//protein complex	GO:0005515//protein binding	GO:0044267//cellular protein metabolic process	gi|62244083|ref|NP_001014762.1|/1.08353e-56/p53 and DNA damage-regulated protein 1 [Rattus norvegicus]
ENSRNOG00000004978	Prkacb	3.20753	0.810607	K04345|1|0.0|694|rno:293508|protein kinase A [EC:2.7.11.11]	GO:0031981//nuclear lumen;GO:0016020//membrane;GO:0043234//protein complex;GO:0044444//cytoplasmic part;GO:0045202//synapse	GO:0051018//protein kinase A binding;GO:0004690//cyclic nucleotide-dependent protein kinase activity;GO:0046872//metal ion binding;GO:0032559;GO:0019900//kinase binding	GO:0015980//energy derivation by oxidation of organic compounds;GO:0007599//hemostasis;GO:0046824//positive regulation of nucleocytoplasmic transport;GO:0033762//response to glucagon stimulus;GO:0045786//negative regulation of cell cycle;GO:0032147//activation of protein kinase activity;GO:0010863//positive regulation of phospholipase C activity;GO:0007169//transmembrane receptor protein tyrosine…	gi|6755076|ref|NP_035230.1|/0/cAMP-dependent protein kinase catalytic subunit beta isoform 1 [Mus musculus]
ENSRNOG00000004829	Immp1l	-3.19188	0.837567	K09647|1|7e-97|352|rno:687395|mitochondrial inner membrane protease subunit 1 [EC:3.4.21.-]	GO:0019866//organelle inner membrane;GO:0043231//intracellular membrane-bounded organelle	GO:0070011	GO:0019538//protein metabolic process	gi|149022834|gb|EDL79728.1|/4.73937e-96/rCG27139, isoform CRA_b [Rattus norvegicus]
ENSRNOG00000048859	Nudcd3	3.58832	0.841832	-	-	GO:0005488//binding	-	gi|157073961|ref|NP_001096832.1|/4.32366e-129/NudC domain containing 3 [Rattus norvegicus]
ENSRNOG00000016794	Phyhd1	3.60516	0.817673	K00477|1|1e-08|62.0|nvi:100118569|phytanoyl-CoA hydroxylase [EC:1.14.11.18]	-	GO:0016701//oxidoreductase activity, acting on single donors with incorporation of molecular oxygen;GO:0043169//cation binding	GO:0008152//metabolic process	gi|61556897|ref|NP_001013099.1|/7.12163e-171/phytanoyl-CoA dioxygenase domain-containing protein 1 [Rattus norvegicus]
ENSRNOG00000014516	Hs6st1	-3.26153	0.826362	K02514|1|0.0|673|mmu:50785|heparan sulfate 6-O-sulfotransferase HS6ST1 [EC:2.8.2.-]	GO:0016021//integral to membrane	GO:0016782//transferase activity, transferring sulfur-containing groups	GO:0005975//carbohydrate metabolic process;GO:0048646//anatomical structure formation involved in morphogenesis;GO:0015012//heparan sulfate proteoglycan biosynthetic process;GO:0048568//embryonic organ development	gi|150421568|sp|Q91ZB4.3|H6ST1_CRIGR/0/RecName: Full=Heparan-sulfate 6-O-sulfotransferase 1; Short=HS6ST-1
ENSRNOG00000009745	PPP3CC	-3.15778	0.826246	K04348|1|0.0|837|rno:171378|protein phosphatase 3, catalytic subunit [EC:3.1.3.16]	GO:0044444//cytoplasmic part	GO:0043169//cation binding;GO:0016791//phosphatase activity;GO:0005515//protein binding	GO:0007417//central nervous system development;GO:0006915//apoptotic process;GO:0006796//phosphate-containing compound metabolic process	gi|300119940|gb|ADJ67995.1|/0/protein phosphatase 3 catalytic subunit gamma transcript variant 1 [Rattus norvegicus]
ENSRNOG00000036735	Cables2	3.72829	0.803151	K09528|1|1e-22|107|cbr:CBG04113|DnaJ homolog subfamily C member 8	-	GO:0019887//protein kinase regulator activity	GO:0050794//regulation of cellular process;GO:0007049//cell cycle	gi|392347015|ref|XP_230952.6|/0/PREDICTED: CDK5 and ABL1 enzyme substrate 2 [Rattus norvegicus]
ENSRNOG00000017752	Mccc2	-3.13741	0.857081	K01969|1|0.0|1093|rno:361884|3-methylcrotonyl-CoA carboxylase beta subunit [EC:6.4.1.4]	GO:0019866//organelle inner membrane;GO:0044429//mitochondrial part	GO:0016421//CoA carboxylase activity;GO:0032559	GO:0006551//leucine metabolic process;GO:0006732//coenzyme metabolic process;GO:0009063//cellular amino acid catabolic process	gi|58865926|ref|NP_001012177.1|/0/methylcrotonoyl-CoA carboxylase beta chain, mitochondrial [Rattus norvegicus]
ENSRNOG00000000779	Znrd1	3.18629	0.823086	K03000|1|8e-70|263|rno:361784|DNA-directed RNA polymerase I subunit RPA12	GO:0031981//nuclear lumen	GO:0034062//RNA polymerase activity;GO:0046914//transition metal ion binding	GO:0006351//transcription, DNA-dependent	gi|47087087|ref|NP_998732.1|/5.81929e-69/DNA-directed RNA polymerase I subunit RPA12 [Rattus norvegicus]
ENSRNOG00000019205	Gnpat	-2.89586	0.833439	K00649|1|0.0|1303|rno:84470|glyceronephosphate O-acyltransferase [EC:2.3.1.42]	GO:0044439	GO:0005488//binding;GO:0016413//O-acetyltransferase activity	GO:0033993//response to lipid;GO:0008366//axon ensheathment;GO:0007043//cell-cell junction assembly;GO:0045017//glycerolipid biosynthetic process;GO:0031667//response to nutrient levels;GO:0032787//monocarboxylic acid metabolic process;GO:0009653//anatomical structure morphogenesis;GO:0006950//response to stress	gi|16758146|ref|NP_445862.1|/0/dihydroxyacetone phosphate acyltransferase [Rattus norvegicus]
ENSRNOG00000005157	Rbbp7	-3.33712	0.866106	K11659|1|0.0|892|rno:83712|histone-binding protein RBBP7	GO:0000118//histone deacetylase complex;GO:0031519//PcG protein complex	GO:0005488//binding	GO:0010286//heat acclimation;GO:0006357//regulation of transcription from RNA polymerase II promoter;GO:0006259//DNA metabolic process;GO:0016049//cell growth;GO:0043486//histone exchange;GO:0032501//multicellular organismal process	gi|4506439|ref|NP_002884.1|/0/histone-binding protein RBBP7 isoform 2 [Homo sapiens]
ENSRNOG00000049152	Nme4	-3.25751	0.813945	K00940|1|4e-106|384|rno:685679|nucleoside-diphosphate kinase [EC:2.7.4.6]	GO:0019866//organelle inner membrane;GO:0005740//mitochondrial envelope	GO:0043169//cation binding;GO:0016776//phosphotransferase activity, phosphate group as acceptor;GO:0032559	GO:0009209;GO:0006796//phosphate-containing compound metabolic process;GO:0009206;GO:0009132//nucleoside diphosphate metabolic process	gi|157823171|ref|NP_001102948.1|/2.97062e-105/nucleoside diphosphate kinase, mitochondrial [Rattus norvegicus]
ENSRNOG00000012775	Ccdc127	2.9985	0.800508	-	-	-	-	gi|149032830|gb|EDL87685.1|/7.91929e-138/similar to RIKEN cDNA 0610011N22 gene [Rattus norvegicus]
ENSRNOG00000008543	Pdlim2	4.95254	0.847614	K03426|1|2e-07|57.8|ssc:100512459|NAD+ diphosphatase [EC:3.6.1.22];K05631|2|9e-07|55.8|acs:100559202|atrophin-1 interacting protein 3 (BAI1-associated protein 1);K06086|4|7e-06|52.8|tad:TRIADDRAFT_55897|sorbin and SH3 domain containing 1	GO:0005924//cell-substrate adherens junction;GO:0032432//actin filament bundle	GO:0051393//alpha-actinin binding;GO:0046914//transition metal ion binding;GO:0017022//myosin binding;GO:0031005//filamin binding	-	gi|56090295|ref|NP_001007623.1|/1.47478e-168/PDZ and LIM domain protein 2 [Rattus norvegicus]
ENSRNOG00000001239	Ddt	-3.66354	0.8866	K10028|1|1e-61|236|rno:29318|D-dopachrome decarboxylase [EC:4.1.1.84]	GO:0044424//intracellular part	GO:0016831//carboxy-lyase activity;GO:0016863//intramolecular oxidoreductase activity, transposing C=C bonds;GO:0005488//binding	GO:0006582//melanin metabolic process;GO:0006952//defense response	gi|13162287|ref|NP_077045.1|/8.75967e-61/D-dopachrome decarboxylase [Rattus norvegicus]
ENSRNOG00000002575	Sap30l	2.2912	0.814556	-	GO:0031981//nuclear lumen	GO:0043169//cation binding;GO:0003676//nucleic acid binding	GO:0010467//gene expression	gi|293340074|ref|XP_001075034.2|/1.79572e-95/PREDICTED: histone deacetylase complex subunit SAP30L-like [Rattus norvegicus]
ENSRNOG00000016272	Edf1	-3.78228	0.891234	K03627|1|2e-80|298|cfa:480674|putative transcription factor	GO:0005667//transcription factor complex	GO:0003712//transcription cofactor activity;GO:0016741;GO:0004468//lysine N-acetyltransferase activity;GO:0001071//nucleic acid binding transcription factor activity;GO:0003677//DNA binding;GO:0005515//protein binding	GO:0006629//lipid metabolic process;GO:0051099//positive regulation of binding;GO:0032501//multicellular organismal process;GO:0030855//epithelial cell differentiation;GO:0006351//transcription, DNA-dependent	gi|10946942|ref|NP_067494.1|/7.35462e-78/endothelial differentiation-related factor 1 [Mus musculus]
ENSRNOG00000045941	4933426M11Rik	3.36688	0.813861	-	GO:0031224//intrinsic to membrane;GO:0031224//intrinsic to membrane	-	-	gi|149025029|gb|EDL81396.1|/3.96648e-173/rCG20613, isoform CRA_a [Rattus norvegicus]
ENSRNOG00000046502	Lonp1	-3.34996	0.857208	K08675|1|0.0|1735|rno:170916|Lon-like ATP-dependent protease [EC:3.4.21.-]	GO:0005759//mitochondrial matrix	GO:0004175//endopeptidase activity;GO:0032559;GO:0003723//RNA binding;GO:0042623//ATPase activity, coupled;GO:0043566//structure-specific DNA binding;GO:0019899//enzyme binding	GO:0000002//mitochondrial genome maintenance;GO:0051131//chaperone-mediated protein complex assembly;GO:0009207;GO:0051259//protein oligomerization;GO:0010038//response to metal ion;GO:0009719;GO:0019941//modification-dependent protein catabolic process;GO:0032502//developmental process;GO:0006979//response to oxidative stress	gi|19173766|ref|NP_596895.1|/0/lon protease homolog, mitochondrial precursor [Rattus norvegicus]
ENSRNOG00000011667	Fastk	-3.4761	0.864611	K08290|1|0.0|727|rno:296741|Fas-activated serine/threonine kinase [EC:2.7.11.8]	GO:0043231//intracellular membrane-bounded organelle	GO:0004674//protein serine/threonine kinase activity;GO:0032559	GO:0010468//regulation of gene expression;GO:0006464//cellular protein modification process;GO:0012501//programmed cell death;GO:0006796//phosphate-containing compound metabolic process	gi|58865504|ref|NP_001011967.1|/0/fas-activated serine/threonine kinase [Rattus norvegicus]
ENSRNOG00000016509	Usp10	-2.91451	0.815778	K11841|1|0.0|1511|rno:307905|ubiquitin carboxyl-terminal hydrolase 10 [EC:3.1.2.15]	GO:0005856//cytoskeleton;GO:0005768//endosome	GO:0016790//thiolester hydrolase activity;GO:0005515//protein binding;GO:0019783//small conjugating protein-specific protease activity	GO:0006259//DNA metabolic process;GO:0019941//modification-dependent protein catabolic process;GO:0042770//signal transduction in response to DNA damage;GO:0070646//protein modification by small protein removal	gi|77628029|ref|NP_001029318.1|/0/ubiquitin carboxyl-terminal hydrolase 10 [Rattus norvegicus]
ENSRNOG00000024336	Senp6	-3.82534	0.844065	K08595|1|0.0|1956|mmu:215351|sentrin-specific protease 6 [EC:3.4.22.-]	GO:0031981//nuclear lumen	GO:0046914//transition metal ion binding;GO:0070011	GO:0019538//protein metabolic process	gi|348605217|ref|NP_001100312.2|/0/sentrin-specific protease 6 [Rattus norvegicus]
ENSRNOG00000013532	Pgam2	-3.9203	0.900459	K01834|1|9e-147|519|rno:24959|2,3-bisphosphoglycerate-dependent phosphoglycerate mutase [EC:5.4.2.1]	GO:0043231//intracellular membrane-bounded organelle;GO:0044444//cytoplasmic part	GO:0005488//binding;GO:0004619//phosphoglycerate mutase activity;GO:0034416//bisphosphoglycerate phosphatase activity	GO:0006007//glucose catabolic process;GO:0010038//response to metal ion;GO:0006796//phosphate-containing compound metabolic process;GO:0048232//male gamete generation;GO:0006936//muscle contraction	gi|8393948|ref|NP_059024.1|/6.95457e-146/phosphoglycerate mutase 2 [Rattus norvegicus]
ENSRNOG00000013636	Ppil3	3.29144	0.803509	K12734|1|5e-93|341|rno:301432|peptidyl-prolyl cis-trans isomerase-like 3 [EC:5.2.1.8]	GO:0005681//spliceosomal complex	GO:0016859//cis-trans isomerase activity;GO:0005488//binding	GO:0000377;GO:0044267//cellular protein metabolic process	gi|148667663|gb|EDL00080.1|/3.26959e-96/peptidylprolyl isomerase (cyclophilin)-like 3, isoform CRA_c [Mus musculus]
ENSRNOG00000010331	Ctsb	-3.25989	0.873426	K01363|1|0.0|741|rno:64529|cathepsin B [EC:3.4.22.1]	GO:0000323//lytic vacuole;GO:0044459//plasma membrane part;GO:0009986//cell surface;GO:0048770;GO:0044421//extracellular region part	GO:0004175//endopeptidase activity;GO:0005515//protein binding	GO:0044248//cellular catabolic process;GO:0009725//response to hormone stimulus;GO:0010243//response to organic nitrogen;GO:0009746;GO:0019222//regulation of metabolic process;GO:0010941//regulation of cell death;GO:0019538//protein metabolic process;GO:0014706//striated muscle tissue development;GO:0034097//response to cytokine stimulus;GO:0006950//response to stress;GO:0009605//response to exte…	gi|82830420|ref|NP_072119.2|/0/cathepsin B preproprotein [Rattus norvegicus]
ENSRNOG00000008530	Stoml1	3.95254	0.823423	K12405|1|1e-08|61.6|bfo:BRAFLDRAFT_125738|3-hydroxyacyl-CoA dehydrogenase / 3a,7a,12a-trihydroxy-5b-cholest-24-enoyl-CoA hydratase [EC:1.1.1.35 4.2.1.107];K08764|2|3e-08|60.5|bfo:BRAFLDRAFT_99780|sterol carrier protein 2 [EC:2.3.1.176];K03364|5|4e-08|59.7|dpo:Dpse_GA14145|cell division cycle 20-like protein 1, cofactor of APC complex	GO:0031224//intrinsic to membrane	GO:0005496//steroid binding	-	gi|62653755|ref|XP_236297.3|/0/PREDICTED: stomatin-like protein 1-like [Rattus norvegicus]
ENSRNOG00000012938	Psmb3	-2.04979	0.827267	K02735|1|2e-113|409|rno:29676|20S proteasome subunit beta 3 [EC:3.4.25.1]	GO:0043231//intracellular membrane-bounded organelle;GO:0000502//proteasome complex	GO:0004175//endopeptidase activity;GO:0005488//binding	GO:0043161//proteasomal ubiquitin-dependent protein catabolic process;GO:0051320//S phase;GO:0007050//cell cycle arrest;GO:0016070//RNA metabolic process;GO:0051439//regulation of ubiquitin-protein ligase activity involved in mitotic cell cycle;GO:0006520//cellular amino acid metabolic process;GO:0006915//apoptotic process;GO:0030330//DNA damage response, signal transduction by p53 class mediator…	gi|8394082|ref|NP_058981.1|/1.31461e-112/proteasome subunit beta type-3 [Rattus norvegicus]
ENSRNOG00000018453	Nop2	-3.13111	0.840063	K14835|1|0.0|1424|rno:314969|ribosomal RNA methyltransferase Nop2 [EC:2.1.1.-]	GO:0043231//intracellular membrane-bounded organelle	GO:0003676//nucleic acid binding;GO:0008168//methyltransferase activity	GO:0042254//ribosome biogenesis;GO:0006730//one-carbon metabolic process	gi|300796393|ref|NP_001178714.1|/0/putative ribosomal RNA methyltransferase NOP2 [Rattus norvegicus]
ENSRNOG00000020543	NOSIP	-3.31998	0.846792	K13125|1|5e-173|607|rno:292894|nitric oxide synthase-interacting protein	GO:0044444//cytoplasmic part;GO:0043231//intracellular membrane-bounded organelle	GO:0005488//binding	GO:0006807//nitrogen compound metabolic process;GO:0032769//negative regulation of monooxygenase activity	gi|157820159|ref|NP_001099730.1|/4.11283e-172/nitric oxide synthase-interacting protein [Rattus norvegicus]
ENSRNOG00000021112	Cdc42se1	2.57772	0.813303	-	GO:0043232;GO:0044444//cytoplasmic part;GO:0016020//membrane	GO:0004857//enzyme inhibitor activity	GO:0065008;GO:0043409//negative regulation of MAPK cascade;GO:0006897//endocytosis	gi|84794651|ref|NP_001034133.1|/3.35261e-41/CDC42 small effector protein 1 [Rattus norvegicus]
ENSRNOG00000016467	Kctd1	3.58198	0.842453	K15074|1|1e-10|67.4|cbr:CBG18386|BTB/POZ domain-containing adapter for CUL3-mediated RhoA degradation protein	GO:0043231//intracellular membrane-bounded organelle;GO:0005887//integral to plasma membrane	GO:0005267//potassium channel activity	GO:0006351//transcription, DNA-dependent;GO:0034220//ion transmembrane transport;GO:0030001//metal ion transport	gi|110808563|sp|Q8R4G8.2|KCTD1_RAT/1.95852e-147/RecName: Full=BTB/POZ domain-containing protein KCTD1; AltName: Full=Vitamin A-deficient testicular protein 6
ENSRNOG00000001803	Dnajb11	-3.54057	0.832206	K09517|1|0.0|684|rno:360734|DnaJ homolog subfamily B member 11	GO:0044432//endoplasmic reticulum part	GO:0005515//protein binding	GO:0044267//cellular protein metabolic process;GO:0009451//RNA modification	gi|397470100|ref|XP_003806671.1|/0/PREDICTED: dnaJ homolog subfamily B member 11 [Pan paniscus]
ENSRNOG00000050585	Pgam1	-2.01845	0.827394	K01834|1|2e-138|493|mmu:18648|2,3-bisphosphoglycerate-dependent phosphoglycerate mutase [EC:5.4.2.1]	GO:0043231//intracellular membrane-bounded organelle;GO:0044444//cytoplasmic part	GO:0019900//kinase binding;GO:0016868//intramolecular transferase activity, phosphotransferases;GO:0034416//bisphosphoglycerate phosphatase activity	GO:0006796//phosphate-containing compound metabolic process;GO:0006096//glycolysis;GO:0006140	gi|403259801|ref|XP_003922386.1|/1.11396e-141/PREDICTED: phosphoglycerate mutase 1 [Saimiri boliviensis boliviensis]
ENSRNOG00000017714	Usp3	3.55449	0.815146	K11986|1|6e-91|335|rno:363084|ubiquitin carboxyl-terminal hydrolase 3 [EC:3.1.2.15]	GO:0043231//intracellular membrane-bounded organelle;GO:0000785//chromatin	GO:0008233//peptidase activity;GO:0016790//thiolester hydrolase activity;GO:0046872//metal ion binding;GO:0005515//protein binding	GO:0010608//posttranscriptional regulation of gene expression;GO:0006259//DNA metabolic process;GO:0007049//cell cycle;GO:0033554//cellular response to stress;GO:0016570//histone modification	gi|149042015|gb|EDL95856.1|/1.1776e-90/rCG58374 [Rattus norvegicus]
ENSRNOG00000000459	Psmb9	3.51631	0.80314	K02741|1|2e-79|295|rno:24967|20S proteasome subunit beta 9 [EC:3.4.25.1]	GO:0044424//intracellular part;GO:0043234//protein complex	GO:0008233//peptidase activity	GO:0043161//proteasomal ubiquitin-dependent protein catabolic process;GO:0051320//S phase;GO:0007050//cell cycle arrest;GO:0016070//RNA metabolic process;GO:0051439//regulation of ubiquitin-protein ligase activity involved in mitotic cell cycle;GO:0006520//cellular amino acid metabolic process;GO:0006915//apoptotic process;GO:0002376//immune system process;GO:0030330//DNA damage response, signal …	gi|258614009|ref|NP_036840.2|/1.9441e-78/proteasome subunit beta type-9 [Rattus norvegicus]
ENSRNOG00000019974	Uba52	-4.71363	0.936392	K02927|1|6e-73|272|ptr:735674|large subunit ribosomal protein L40e	GO:0030529//ribonucleoprotein complex;GO:0030139//endocytic vesicle;GO:0031090//organelle membrane;GO:0031981//nuclear lumen	GO:0005198//structural molecule activity;GO:0005488//binding	GO:0031016//pancreas development;GO:0051091//positive regulation of sequence-specific DNA binding transcription factor activity;GO:0050851//antigen receptor-mediated signaling pathway;GO:0006259//DNA metabolic process;GO:0051320//S phase;GO:0030330//DNA damage response, signal transduction by p53 class mediator;GO:0043066//negative regulation of apoptotic process;GO:0007173//epidermal growth fact…	gi|13569612|gb|AAK31162.1|/8.69746e-74/ubiquitin A-52 residue ribosomal protein fusion product 1 [Homo sapiens]
ENSRNOG00000003385	GLRX2	-3.67545	0.807553	K03676|1|3e-63|243|rno:114022|glutaredoxin 3	GO:0031981//nuclear lumen;GO:0031981//nuclear lumen	GO:0043169//cation binding;GO:0051536//iron-sulfur cluster binding;GO:0015037//peptide disulfide oxidoreductase activity;GO:0030611//arsenate reductase activity;GO:0043169//cation binding;GO:0051536//iron-sulfur cluster binding;GO:0015037//peptide disulfide oxidoreductase activity;GO:0030611//arsenate reductase activity	GO:0012501//programmed cell death;GO:0048869//cellular developmental process;GO:0006259//DNA metabolic process;GO:0000302//response to reactive oxygen species;GO:0006457//protein folding;GO:0009628//response to abiotic stimulus;GO:0006790//sulfur compound metabolic process;GO:0006091//generation of precursor metabolites and energy;GO:0019725//cellular homeostasis;GO:0051234//establishment of loca…	gi|61556751|ref|NP_001013052.1|/2.84461e-66/glutaredoxin-2, mitochondrial [Rattus norvegicus]
ENSRNOG00000015866	Hint2	-2.89584	0.854417	K02089|1|8e-43|173|ame:408406|cyclin-dependent kinase 4 [EC:2.7.11.22];K10863|2|1e-06|53.5|acs:100558032|aprataxin [EC:3.-.-.-]	GO:0043231//intracellular membrane-bounded organelle	GO:0003824//catalytic activity	GO:0012501//programmed cell death;GO:0008202//steroid metabolic process	gi|164565401|ref|NP_001101425.2|/3.63015e-87/histidine triad nucleotide binding protein 2 [Rattus norvegicus]
ENSRNOG00000019108	Rmi1	-3.79524	0.808311	K10990|1|0.0|1152|rno:306734|RecQ-mediated genome instability protein 1	GO:0043231//intracellular membrane-bounded organelle	-	GO:0006259//DNA metabolic process	gi|293342595|ref|XP_001067170.2|/0/PREDICTED: recQ-mediated genome instability protein 1-like [Rattus norvegicus]
ENSRNOG00000003846	Pitpna	-3.30591	0.850963	K01106|1|2e-126|453|gga:771549|inositol-1,4,5-trisphosphate 5-phosphatase [EC:3.1.3.56];K09441|2|2e-11|71.6|spu:591116|GA-binding protein transcription factor, alpha	GO:0031224//intrinsic to membrane;GO:0043231//intracellular membrane-bounded organelle;GO:0044444//cytoplasmic part	GO:0008289//lipid binding;GO:0005548//phospholipid transporter activity	GO:0044238//primary metabolic process;GO:0050953//sensory perception of light stimulus;GO:0006935//chemotaxis;GO:0006869//lipid transport	gi|74219964|dbj|BAE40562.1|/0/unnamed protein product [Mus musculus]
ENSRNOG00000015213	Fxn	1.88043	0.805815	-	GO:0044429//mitochondrial part;GO:0044429//mitochondrial part	GO:0005515//protein binding;GO:0016724;GO:0051536//iron-sulfur cluster binding;GO:0005506//iron ion binding;GO:0005515//protein binding;GO:0016724;GO:0051536//iron-sulfur cluster binding;GO:0005506//iron ion binding	GO:0030307//positive regulation of cell growth;GO:0051339;GO:0043085//positive regulation of catalytic activity;GO:0034614//cellular response to reactive oxygen species;GO:0045926//negative regulation of growth;GO:0008283//cell proliferation;GO:0016226//iron-sulfur cluster assembly;GO:0016485//protein processing;GO:0045333//cellular respiration;GO:0010038//response to metal ion;GO:0009790//embryo…	gi|300794591|ref|NP_001178881.1|/3.75586e-104/frataxin, mitochondrial [Rattus norvegicus]
ENSRNOG00000009325	Fuca1	-3.01546	0.813956	K01206|1|0.0|962|rno:24375|alpha-L-fucosidase [EC:3.2.1.51]	GO:0000323//lytic vacuole	GO:0015928//fucosidase activity;GO:0030246//carbohydrate binding;GO:0043167//ion binding	GO:0006026;GO:0016139//glycoside catabolic process;GO:0019318//hexose metabolic process	gi|158186726|ref|NP_036694.2|/0/tissue alpha-L-fucosidase precursor [Rattus norvegicus]
ENSRNOG00000011164	Coq6	-3.4638	0.830469	K06126|1|0.0|875|rno:299195|ubiquinone biosynthesis monooxygenase Coq6 [EC:1.14.13.-]	GO:0043231//intracellular membrane-bounded organelle	GO:0004497//monooxygenase activity;GO:0050662//coenzyme binding	GO:0006743//ubiquinone metabolic process	gi|58865534|ref|NP_001011983.1|/0/ubiquinone biosynthesis monooxygenase COQ6 precursor [Rattus norvegicus]
ENSRNOG00000036971	RGD1566320	3.15352	0.821496	-	GO:0043231//intracellular membrane-bounded organelle	-	-	gi|157817951|ref|NP_001099990.1|/1.83619e-56/uncharacterized protein LOC296207 [Rattus norvegicus]
ENSRNOG00000018516	Impa2	-3.61969	0.834618	K01092|1|3e-165|582|rno:282636|myo-inositol-1(or 4)-monophosphatase [EC:3.1.3.25]	GO:0044424//intracellular part	GO:0042802//identical protein binding;GO:0043169//cation binding	GO:0046838//phosphorylated carbohydrate dephosphorylation;GO:0019751//polyol metabolic process;GO:0023052//signaling	gi|74181837|dbj|BAE32621.1|/0/unnamed protein product [Mus musculus]
ENSRNOG00000014490	Bdh2	3.43132	0.807479	K00019|1|5e-141|501|rno:295458|3-hydroxybutyrate dehydrogenase [EC:1.1.1.30]	GO:0043231//intracellular membrane-bounded organelle	GO:0016627//oxidoreductase activity, acting on the CH-CH group of donors;GO:0016616//oxidoreductase activity, acting on the CH-OH group of donors, NAD or NADP as acceptor;GO:0000166//nucleotide binding	GO:0006778//porphyrin-containing compound metabolic process;GO:0055080//cation homeostasis;GO:0009237//siderophore metabolic process;GO:0009062//fatty acid catabolic process	gi|157816997|ref|NP_001099943.1|/4.39742e-140/3-hydroxybutyrate dehydrogenase type 2 [Rattus norvegicus]
ENSRNOG00000018898	Mpi	-3.57917	0.829121	K01809|1|0.0|850|rno:300741|mannose-6-phosphate isomerase [EC:5.3.1.8]	GO:0044444//cytoplasmic part	GO:0046914//transition metal ion binding;GO:0016861//intramolecular oxidoreductase activity, interconverting aldoses and ketoses	GO:0009226//nucleotide-sugar biosynthetic process;GO:0006487//protein N-linked glycosylation;GO:0019318//hexose metabolic process	gi|51854221|ref|NP_001004081.1|/0/mannose-6-phosphate isomerase [Rattus norvegicus]
ENSRNOG00000024605	Fam220a	3.15017	0.810512	-	-	-	-	gi|62945326|ref|NP_001017485.1|/2.03145e-136/protein FAM220A [Rattus norvegicus]
ENSRNOG00000001278	Gpn3	3.78163	0.809364	K06883|1|2e-153|542|rno:360810|	GO:0032991//macromolecular complex	GO:0032561//guanyl ribonucleotide binding	-	gi|149063366|gb|EDM13689.1|/4.56579e-153/ATP binding domain 1 family, member C, isoform CRA_b [Rattus norvegicus]
ENSRNOG00000016511	Pitrm1	-3.39423	0.845613	K06972|1|0.0|1952|rno:307081|	GO:0044429//mitochondrial part	GO:0004175//endopeptidase activity;GO:0046914//transition metal ion binding;GO:0030234//enzyme regulator activity	GO:0019538//protein metabolic process	gi|157819139|ref|NP_001100833.1|/0/presequence protease, mitochondrial [Rattus norvegicus]
ENSRNOG00000007753	Plaa	-2.99059	0.821159	K14018|1|0.0|1620|rno:116645|phospholipase A-2-activating protein	-	GO:0016004//phospholipase activator activity	GO:0006952//defense response;GO:0023052//signaling;GO:0019637//organophosphate metabolic process	gi|149044496|gb|EDL97755.1|/0/phospholipase A2, activating protein, isoform CRA_a [Rattus norvegicus]
ENSRNOG00000010728	Stradb	-3.63827	0.864084	K08271|1|7e-92|339|xtr:493513|protein kinase LYK5	GO:0043231//intracellular membrane-bounded organelle;GO:0044444//cytoplasmic part	GO:0016301//kinase activity;GO:0032559	GO:0032989;GO:0006605//protein targeting;GO:0007169//transmembrane receptor protein tyrosine kinase signaling pathway;GO:0006996//organelle organization;GO:0022402//cell cycle process;GO:0045860//positive regulation of protein kinase activity;GO:0019217//regulation of fatty acid metabolic process;GO:0043066//negative regulation of apoptotic process;GO:0000165//MAPK cascade	gi|167555101|ref|NP_001102777.2|/0/polyploidy associated protein kinase PAPK-A [Rattus norvegicus]
ENSRNOG00000014811	RGD1561328	2.70972	0.810955	-	GO:0012505//endomembrane system;GO:0044444//cytoplasmic part;GO:0012505//endomembrane system;GO:0044444//cytoplasmic part	GO:0046914//transition metal ion binding;GO:0019787//small conjugating protein ligase activity;GO:0046914//transition metal ion binding	GO:0032446//protein modification by small protein conjugation	gi|189163499|ref|NP_001020293.2|/2.92344e-79/cysteine and histidine-rich protein 1 [Rattus norvegicus]
ENSRNOG00000028225	Tnni3k	-3.38579	0.842885	K10380|1|1e-39|166|tsp:Tsp_02713|ankyrin	GO:0043231//intracellular membrane-bounded organelle	GO:0043169//cation binding;GO:0008092//cytoskeletal protein binding;GO:0004672//protein kinase activity;GO:0032559	GO:0006464//cellular protein modification process;GO:0006796//phosphate-containing compound metabolic process	gi|32401467|ref|NP_861434.1|/0/serine/threonine-protein kinase TNNI3K [Rattus norvegicus]
ENSRNOG00000018659	Csf1	-2.85444	0.810702	K05453|1|0.0|1032|rno:78965|macrophage colony-stimulating factor 1	GO:0016021//integral to membrane;GO:0043234//protein complex;GO:0044421//extracellular region part;GO:0044444//cytoplasmic part	GO:0005126//cytokine receptor binding;GO:0042802//identical protein binding	GO:0033674//positive regulation of kinase activity;GO:0031325//positive regulation of cellular metabolic process;GO:0010742//macrophage derived foam cell differentiation;GO:0001952//regulation of cell-matrix adhesion;GO:0010467//gene expression;GO:0046578//regulation of Ras protein signal transduction;GO:0060560//developmental growth involved in morphogenesis;GO:0002763//positive regulation of my…	gi|28201782|sp|Q8JZQ0.1|CSF1_RAT/0/RecName: Full=Macrophage colony-stimulating factor 1; Short=CSF-1; Short=MCSF; Contains: RecName: Full=Processed macrophage colony-stimulating factor 1; Flags: Precursor
ENSRNOG00000020642	Flad1	-3.41997	0.846813	K00953|1|0.0|996|rno:751787|FAD synthetase [EC:2.7.7.2]	GO:0044444//cytoplasmic part	GO:0070566//adenylyltransferase activity;GO:0032559	GO:0006766//vitamin metabolic process;GO:0009108//coenzyme biosynthetic process;GO:0046443//FAD metabolic process	gi|148683252|gb|EDL15199.1|/0/RFad1, flavin adenine dinucleotide synthetase, homolog (yeast), isoform CRA_b [Mus musculus]
ENSRNOG00000001385	Plbd2	-3.66934	0.841516	-	GO:0005764//lysosome	GO:0003824//catalytic activity	GO:0006629//lipid metabolic process	gi|158341628|ref|NP_640348.2|/0/putative phospholipase B-like 2 precursor [Rattus norvegicus]
ENSRNOG00000018102	Coa5	3.16741	0.857513	-	GO:0043231//intracellular membrane-bounded organelle	-	-	gi|113461996|ref|NP_932123.3|/3.51684e-38/cytochrome c oxidase assembly factor 5 [Mus musculus]
ENSRNOG00000006086	Lynx1	2.0356	0.801898	K06846|1|2e-28|124|oaa:100082309|lymphocyte antigen 6 complex	GO:0031224//intrinsic to membrane	GO:0016248//channel inhibitor activity;GO:0005488//binding;GO:0030547//receptor inhibitor activity	GO:0051704;GO:0010469//regulation of receptor activity;GO:0007268//synaptic transmission	gi|7106349|ref|NP_035968.1|/6.31996e-56/ly-6/neurotoxin-like protein 1 precursor [Mus musculus]
ENSRNOG00000011146	Gyg1	-3.59402	0.884389	K00750|1|0.0|652|rno:81675|glycogenin glucosyltransferase [EC:2.4.1.186]	GO:0044444//cytoplasmic part	GO:0048029//monosaccharide binding;GO:0043169//cation binding;GO:0035251//UDP-glucosyltransferase activity	GO:0005977//glycogen metabolic process;GO:0019318//hexose metabolic process	gi|13591969|ref|NP_112305.1|/0/glycogenin-1 [Rattus norvegicus]
ENSRNOG00000015145	Ppp6c	-3.10316	0.827088	K15498|1|0.0|646|dre:393980|serine/threonine-protein phosphatase 6 catalytic subunit [EC:3.1.3.16]	GO:0044444//cytoplasmic part	GO:0043169//cation binding;GO:0004721//phosphoprotein phosphatase activity	GO:0006464//cellular protein modification process;GO:0006796//phosphate-containing compound metabolic process;GO:0022402//cell cycle process	gi|21312758|ref|NP_077171.1|/0/serine/threonine-protein phosphatase 6 catalytic subunit [Mus musculus]
ENSRNOG00000014064	Ctsh	-3.88763	0.874131	K01366|1|0.0|667|rno:25425|cathepsin H [EC:3.4.22.16]	GO:0000323//lytic vacuole	GO:0004175//endopeptidase activity;GO:0005515//protein binding	GO:0010631//epithelial cell migration;GO:0019538//protein metabolic process;GO:0031647//regulation of protein stability;GO:0033189//response to vitamin A;GO:0060600	gi|6978721|ref|NP_037071.1|/0/pro-cathepsin H precursor [Rattus norvegicus]
ENSRNOG00000010408	Polr2k	3.49227	0.861094	K03009|1|2e-29|127|ecb:100630612|DNA-directed RNA polymerases I, II, and III subunit RPABC4	GO:0031981//nuclear lumen	GO:0003676//nucleic acid binding;GO:0046914//transition metal ion binding;GO:0034062//RNA polymerase activity	GO:0006289//nucleotide-excision repair;GO:0000377;GO:0006355//regulation of transcription, DNA-dependent;GO:0006352//DNA-dependent transcription, initiation;GO:0006397//mRNA processing;GO:0006353//DNA-dependent transcription, termination;GO:0045935;GO:0006354//DNA-dependent transcription, elongation	gi|8248885|gb|AAB27565.2|/2.97537e-37/metallothionein-I gene transcription activator [Mus sp.]
ENSRNOG00000026119	Ywhah	-3.06454	0.864737	K06630|1|5e-136|485|ssc:100155504|tyrosine 3-monooxygenase/tryptophan 5-monooxygenase activation protein	GO:0044424//intracellular part	GO:0016491//oxidoreductase activity;GO:0008092//cytoskeletal protein binding;GO:0035258//steroid hormone receptor binding	GO:0006584//catecholamine metabolic process;GO:0015031//protein transport;GO:0050767//regulation of neurogenesis;GO:0007067//mitosis;GO:0006915//apoptotic process;GO:0008208;GO:0050804//regulation of synaptic transmission;GO:0031345//negative regulation of cell projection organization;GO:0031958	gi|6756037|ref|NP_035868.1|/4.25398e-135/14-3-3 protein eta [Mus musculus]
ENSRNOG00000021090	Pygm	-3.77342	0.895794	K00688|1|0.0|1663|rno:24701|starch phosphorylase [EC:2.4.1.1]	GO:0031674//I band;GO:0005783//endoplasmic reticulum	GO:0042802//identical protein binding;GO:0004645//phosphorylase activity;GO:0030246//carbohydrate binding;GO:0048037//cofactor binding;GO:0032559	GO:0006875//cellular metal ion homeostasis;GO:0005977//glycogen metabolic process;GO:0006950//response to stress;GO:0010033//response to organic substance	gi|158138498|ref|NP_036770.1|/0/glycogen phosphorylase, muscle form [Rattus norvegicus]
ENSRNOG00000017463	Bloc1s3	3.8523	0.815146	-	GO:0031082	GO:0005515//protein binding	GO:0009306//protein secretion;GO:0007423//sensory organ development;GO:0030101//natural killer cell activation;GO:0042221//response to chemical stimulus;GO:0048753//pigment granule organization;GO:0007599//hemostasis;GO:0048193//Golgi vesicle transport;GO:0033363//secretory granule organization	gi|109458315|ref|XP_001058094.1|/2.36133e-62/PREDICTED: biogenesis of lysosome-related organelles complex 1 subunit 3 [Rattus norvegicus]
ENSRNOG00000013548	Sepw1	2.66535	0.828226	-	GO:0043231//intracellular membrane-bounded organelle;GO:0016020//membrane	GO:0005488//binding;GO:0016651//oxidoreductase activity, acting on NADH or NADPH	GO:0019725//cellular homeostasis;GO:0010038//response to metal ion	gi|6677917|ref|NP_033182.1|/4.83581e-40/selenoprotein W [Mus musculus]
ENSRNOG00000046366	DMD	-3.34811	0.828236	K10366|1|0.0|1078|acs:100557883|dystrophin	GO:0043234//protein complex;GO:0005886//plasma membrane;GO:0030016//myofibril	GO:0001948//glycoprotein binding;GO:0046914//transition metal ion binding;GO:0008092//cytoskeletal protein binding;GO:0019899//enzyme binding;GO:0005198//structural molecule activity	GO:0006936//muscle contraction;GO:0006518//peptide metabolic process;GO:0048513//organ development	gi|52630316|ref|NP_001005244.1|/0/dystrophin isoform Dp71ab [Rattus norvegicus]
ENSRNOG00000028178	Smim4	3.4661	0.838199	-	GO:0031224//intrinsic to membrane;GO:0031224//intrinsic to membrane	-	-	gi|293342329|ref|XP_001062546.2|/6.99061e-39/PREDICTED: UPF0640 protein C3orf78 homolog [Rattus norvegicus]
ENSRNOG00000042355	Tarbp2	3.56978	0.802803	-	GO:0043231//intracellular membrane-bounded organelle;GO:0031332;GO:0044444//cytoplasmic part	GO:0042802//identical protein binding;GO:0003723//RNA binding	GO:0016246//RNA interference;GO:0033673//negative regulation of kinase activity;GO:0006412//translation;GO:0006355//regulation of transcription, DNA-dependent;GO:0050687//negative regulation of defense response to virus;GO:0035196//production of miRNAs involved in gene silencing by miRNA;GO:0045069//regulation of viral genome replication	gi|77917582|ref|NP_001030113.1|/3.2333e-157/RISC-loading complex subunit TARBP2 [Rattus norvegicus]
ENSRNOG00000016064	Tkt	-3.50331	0.848551	K00615|1|0.0|1274|rno:64524|transketolase [EC:2.2.1.1]	GO:0042579//microbody;GO:0031090//organelle membrane	GO:0019842//vitamin binding;GO:0046872//metal ion binding;GO:0016744	GO:0005997//xylulose metabolic process;GO:0050789//regulation of biological process;GO:0006098//pentose-phosphate shunt;GO:0015980//energy derivation by oxidation of organic compounds;GO:0019302	gi|149034221|gb|EDL88991.1|/0/transketolase, isoform CRA_a [Rattus norvegicus]
ENSRNOG00000011503	Shb	2.32359	0.801434	-	GO:0044464//cell part;GO:0016020//membrane;GO:0044424//intracellular part	GO:0030674//protein binding, bridging;GO:0030674//protein binding, bridging	GO:0032502//developmental process;GO:0032501//multicellular organismal process;GO:0009987//cellular process;GO:0023052//signaling;GO:0048646//anatomical structure formation involved in morphogenesis;GO:0032501//multicellular organismal process;GO:0012501//programmed cell death;GO:0023052//signaling;GO:0048869//cellular developmental process;GO:0042113//B cell activation	gi|74211329|dbj|BAE26425.1|/1.05065e-90/unnamed protein product [Mus musculus]
ENSRNOG00000020288	Slc25a20	-3.30984	0.866696	K15109|1|4e-165|582|rno:117035|solute carrier family 25 (mitochondrial carnitine/acylcarnitine transporter), member 20/29	GO:0031224//intrinsic to membrane;GO:0043231//intracellular membrane-bounded organelle;GO:0019866//organelle inner membrane	GO:0022891//substrate-specific transmembrane transporter activity	GO:0051181//cofactor transport;GO:0003333//amino acid transmembrane transport;GO:0019217//regulation of fatty acid metabolic process	gi|52138624|ref|NP_446417.2|/3.44773e-164/mitochondrial carnitine/acylcarnitine carrier protein [Rattus norvegicus]
ENSRNOG00000014109	Psmd13	-3.63032	0.862979	K03039|1|0.0|735|rno:365388|26S proteasome regulatory subunit N9	GO:0022624//proteasome accessory complex	GO:0005488//binding	GO:0043161//proteasomal ubiquitin-dependent protein catabolic process;GO:0051320//S phase;GO:0007050//cell cycle arrest;GO:0016070//RNA metabolic process;GO:0051439//regulation of ubiquitin-protein ligase activity involved in mitotic cell cycle;GO:0006520//cellular amino acid metabolic process;GO:0006915//apoptotic process;GO:0007126//meiosis;GO:0030330//DNA damage response, signal transduction b…	gi|157821581|ref|NP_001102395.1|/0/26S proteasome non-ATPase regulatory subunit 13 [Rattus norvegicus]
ENSRNOG00000006151	Reg3b	3.54842	0.817221	K06560|1|1e-14|80.5|gga:771888|mannose receptor, C type	GO:0044424//intracellular part;GO:0044421//extracellular region part	GO:0030246//carbohydrate binding	GO:0032501//multicellular organismal process;GO:0002526//acute inflammatory response;GO:0016337//cell-cell adhesion	gi|16757982|ref|NP_445741.1|/2.66346e-96/regenerating islet-derived protein 3-beta precursor [Rattus norvegicus]
ENSRNOG00000030124	Ptpn11	-3.00038	0.839578	K07293|1|0.0|1159|rno:25622|protein tyrosine phosphatase, non-receptor type 11 [EC:3.1.3.48]	GO:0032991//macromolecular complex;GO:0032432//actin filament bundle;GO:0043231//intracellular membrane-bounded organelle;GO:0044459//plasma membrane part;GO:0044444//cytoplasmic part	GO:0051427;GO:0004725//protein tyrosine phosphatase activity;GO:0019899//enzyme binding	GO:0006639//acylglycerol metabolic process;GO:0006470//protein dephosphorylation;GO:0007169//transmembrane receptor protein tyrosine kinase signaling pathway;GO:0035264//multicellular organism growth;GO:0060123//regulation of growth hormone secretion;GO:0046888//negative regulation of hormone secretion;GO:0022414//reproductive process;GO:0006935//chemotaxis;GO:0006974//response to DNA damage stim…	gi|294862237|ref|NP_037220.2|/0/tyrosine-protein phosphatase non-receptor type 11 isoform 2 [Rattus norvegicus]
ENSRNOG00000017619	Aldh1a1	-2.50889	0.822255	K00128|1|0.0|986|rno:24188|aldehyde dehydrogenase (NAD+) [EC:1.2.1.3];K07249|3|0.0|909|mmu:26358|retinal dehydrogenase [EC:1.2.1.36]	GO:0044444//cytoplasmic part	GO:0019115//benzaldehyde dehydrogenase activity;GO:0004030//aldehyde dehydrogenase [NAD(P)+] activity;GO:0005515//protein binding	GO:0048562//embryonic organ morphogenesis;GO:0033189//response to vitamin A;GO:0007612//learning;GO:0043627//response to estrogen stimulus;GO:0022602//ovulation cycle process;GO:0006915//apoptotic process;GO:0035238//vitamin A biosynthetic process;GO:0048565//digestive tract development;GO:0016331//morphogenesis of embryonic epithelium;GO:0006950//response to stress;GO:0051260//protein homooligom…	gi|28386049|gb|AAH44729.1|/0/Aldh1a1 protein [Mus musculus]
ENSRNOG00000000786	Rpp21	3.15687	0.832238	K03540|1|1e-84|311|rno:406230|ribonuclease P protein subunit RPR2 [EC:3.1.26.5]	GO:0031981//nuclear lumen	GO:0005488//binding;GO:0004549//tRNA-specific ribonuclease activity	GO:0006399//tRNA metabolic process;GO:0042221//response to chemical stimulus	gi|50657376|ref|NP_001002831.1|/7.86054e-84/ribonuclease P protein subunit p21 [Rattus norvegicus]
ENSRNOG00000005358	Pmm1	-3.71286	0.831585	K01840|1|6e-144|511|rno:300089|phosphomannomutase [EC:5.4.2.8]	GO:0044444//cytoplasmic part;GO:0044297//cell body	GO:0043169//cation binding;GO:0016868//intramolecular transferase activity, phosphotransferases	GO:0009226//nucleotide-sugar biosynthetic process;GO:0006013//mannose metabolic process;GO:0006487//protein N-linked glycosylation	gi|56605724|ref|NP_001008324.1|/4.45459e-143/phosphomannomutase 1 [Rattus norvegicus]
ENSRNOG00000007390	Nfkbia	-3.40031	0.866064	K04734|1|7e-172|604|rno:25493|NF-kappa-B inhibitor alpha	GO:0016020//membrane;GO:0043231//intracellular membrane-bounded organelle;GO:0043234//protein complex;GO:0044444//cytoplasmic part	GO:0019899//enzyme binding;GO:0005048//signal sequence binding;GO:0008134//transcription factor binding	GO:0031325//positive regulation of cellular metabolic process;GO:0045596//negative regulation of cell differentiation;GO:0010742//macrophage derived foam cell differentiation;GO:0042994//cytoplasmic sequestering of transcription factor;GO:0008283//cell proliferation;GO:0002224//toll-like receptor signaling pathway;GO:0043433//negative regulation of sequence-specific DNA binding transcription fact…	gi|148704779|gb|EDL36726.1|/4.43102e-176/nuclear factor of kappa light chain gene enhancer in B-cells inhibitor, alpha [Mus musculus]
ENSRNOG00000016327	Mcee	-2.86625	0.82771	K05606|1|2e-89|329|rno:293829|methylmalonyl-CoA/ethylmalonyl-CoA epimerase [EC:5.1.99.1]	GO:0044429//mitochondrial part	GO:0016854//racemase and epimerase activity	GO:0009062//fatty acid catabolic process;GO:0006732//coenzyme metabolic process	gi|157821869|ref|NP_001099811.1|/1.25409e-88/methylmalonyl-CoA epimerase, mitochondrial [Rattus norvegicus]
ENSRNOG00000037284	Idh3g	-3.02872	0.870972	K00030|1|0.0|654|rno:25179|isocitrate dehydrogenase (NAD+) [EC:1.1.1.41]	GO:0031981//nuclear lumen;GO:0030062//mitochondrial tricarboxylic acid cycle enzyme complex	GO:0046872//metal ion binding;GO:0004448//isocitrate dehydrogenase activity;GO:0032559	GO:0040008//regulation of growth;GO:0043648//dicarboxylic acid metabolic process;GO:0009060//aerobic respiration;GO:0019674//NAD metabolic process	gi|54020666|ref|NP_113739.1|/0/isocitrate dehydrogenase [NAD] subunit gamma 1, mitochondrial precursor [Rattus norvegicus]
ENSRNOG00000017820	Nqo2	-3.12242	0.824298	K08071|1|2e-134|479|rno:291084|ribosyldihydronicotinamide dehydrogenase (quinone) [EC:1.10.99.2]	GO:0031981//nuclear lumen	GO:0043169//cation binding;GO:0016491//oxidoreductase activity;GO:0048037//cofactor binding	GO:0008152//metabolic process;GO:0007611//learning or memory	gi|51948400|ref|NP_001004214.1|/1.89016e-133/ribosyldihydronicotinamide dehydrogenase [quinone] [Rattus norvegicus]
ENSRNOG00000015202	Dnajc5	-3.63854	0.839631	K09525|1|2e-94|345|rno:79130|DnaJ homolog subfamily C member 5	GO:0030665//clathrin-coated vesicle membrane;GO:0048770	GO:0005515//protein binding	GO:0044267//cellular protein metabolic process;GO:0001505//regulation of neurotransmitter levels;GO:0043066//negative regulation of apoptotic process	gi|15126683|gb|AAH12268.1|/2.61549e-94/Dnajc5 protein [Mus musculus]
ENSRNOG00000022732	Tmem126b	3.5551	0.812471	-	GO:0031224//intrinsic to membrane	-	-	gi|149068982|gb|EDM18534.1|/9.77097e-127/hypothetical LOC293114 (predicted), isoform CRA_c [Rattus norvegicus]
ENSRNOG00000016133	Sumo1	-3.69802	0.871688	K12160|1|2e-52|206|ssc:100127139|small ubiquitin-related modifier	GO:0043005//neuron projection;GO:0016604//nuclear body;GO:0005635//nuclear envelope	GO:0019787//small conjugating protein ligase activity;GO:0019899//enzyme binding	GO:0006351//transcription, DNA-dependent;GO:0006461//protein complex assembly;GO:0001959//regulation of cytokine-mediated signaling pathway;GO:0006259//DNA metabolic process;GO:0043392//negative regulation of DNA binding;GO:0008104//protein localization;GO:0031331;GO:0032446//protein modification by small protein conjugation	gi|159162028|pdb|1A5R|A/1.24426e-51/Chain A, Structure Determination Of The Small Ubiquitin-Related Modifier Sumo-1, Nmr, 10 Structures
ENSRNOG00000022303	Pdf	3.07419	0.811281	K01462|1|6e-124|443|rno:100363967|peptide deformylase [EC:3.5.1.88]	GO:0043231//intracellular membrane-bounded organelle	GO:0016811//hydrolase activity, acting on carbon-nitrogen (but not peptide) bonds, in linear amides;GO:0046872//metal ion binding	GO:0008283//cell proliferation;GO:0018193//peptidyl-amino acid modification	gi|293355230|ref|XP_001073696.2|/4.62247e-123/PREDICTED: peptide deformylase, mitochondrial-like [Rattus norvegicus]
ENSRNOG00000007560	Zfp706	3.04519	0.857587	-	-	-	-	gi|32450410|gb|AAH54356.1|/4.71156e-06/Zfp706 protein [Mus musculus]
ENSRNOG00000012181	Lpl	-3.39878	0.882788	K01059|1|0.0|938|rno:24539|lipoprotein lipase [EC:3.1.1.34]	GO:0031224//intrinsic to membrane;GO:0034385	GO:0008289//lipid binding;GO:0004091//carboxylesterase activity;GO:0005515//protein binding;GO:0005539//glycosaminoglycan binding	GO:0006631//fatty acid metabolic process;GO:0006641//triglyceride metabolic process;GO:0034370//triglyceride-rich lipoprotein particle remodeling;GO:0042221//response to chemical stimulus;GO:0010884//positive regulation of lipid storage;GO:0010742//macrophage derived foam cell differentiation;GO:0055088//lipid homeostasis;GO:0010878//cholesterol storage	gi|6981168|ref|NP_036730.1|/0/lipoprotein lipase precursor [Rattus norvegicus]
ENSRNOG00000050348	Isoc2a	3.28159	0.83287	K04432|1|2e-11|68.9|tsp:Tsp_02206|mitogen-activated protein kinase kinase 3 [EC:2.7.12.2]	GO:0043231//intracellular membrane-bounded organelle	GO:0005488//binding	GO:0031647//regulation of protein stability	gi|149016683|gb|EDL75869.1|/4.0896e-108/rCG22622 [Rattus norvegicus]
ENSRNOG00000042962	Pdss2	-3.62283	0.805742	K12505|1|0.0|699|rno:365592|decaprenyl-diphosphate synthase subunit 2 [EC:2.5.1.91]	GO:0043231//intracellular membrane-bounded organelle	GO:0046983//protein dimerization activity;GO:0016765//transferase activity, transferring alkyl or aryl (other than methyl) groups	GO:0006720//isoprenoid metabolic process;GO:0051262//protein tetramerization;GO:0032501//multicellular organismal process;GO:0006743//ubiquinone metabolic process	gi|62079229|ref|NP_001014271.1|/0/decaprenyl-diphosphate synthase subunit 2 [Rattus norvegicus]
ENSRNOG00000000466	Hsd17b8	-3.41453	0.862294	K13370|1|7e-109|394|rno:361802|estradiol 17beta-dehydrogenase / testosterone 17beta-dehydrogenase / [EC:1.1.1.62 1.1.1.63]	GO:0031967;GO:0044429//mitochondrial part;GO:0016020//membrane	GO:0033764//steroid dehydrogenase activity, acting on the CH-OH group of donors, NAD or NADP as acceptor;GO:0005488//binding	GO:0006631//fatty acid metabolic process;GO:0006694//steroid biosynthetic process	gi|47087119|ref|NP_997694.1|/5.77406e-108/estradiol 17-beta-dehydrogenase 8 [Rattus norvegicus]
ENSRNOG00000021735	Akr1cl	-3.48221	0.883104	K00037|1|5e-130|464|hsa:1109|3-alpha-hydroxysteroid dehydrogenase [EC:1.1.1.50] K00089 3alpha-hydroxysteroid dehydrogenase (A-specific) [EC:1.1.1.213] K00092 chlordecone reductase [EC:1.1.1.225] K00212 trans-1,2-dihydrobenzene-1,2-diol dehydrogenase [EC:1.3.1.20];K00100|2|1e-129|463|mmu:83702|[EC:1.1.1.-];K00089|3|3e-126|452|hsa:1645|3alpha-hydroxysteroid dehydrogenase (A-specific) [EC:1.1.1.213]…	-	GO:0003824//catalytic activity	GO:0008152//metabolic process	gi|158138555|ref|NP_001103370.1|/2.81355e-178/aldo-keto reductase family 1, member C-like [Rattus norvegicus]
ENSRNOG00000020902	G6pc3	-2.94538	0.809838	K01084|1|6e-58|225|acs:100557368|glucose-6-phosphatase [EC:3.1.3.9]	GO:0031090//organelle membrane;GO:0043231//intracellular membrane-bounded organelle;GO:0031224//intrinsic to membrane	GO:0019203//carbohydrate phosphatase activity	GO:0015712//hexose phosphate transport;GO:0006006//glucose metabolic process;GO:0006796//phosphate-containing compound metabolic process	gi|51036684|ref|NP_788266.2|/0/glucose-6-phosphatase 3 [Rattus norvegicus]
ENSRNOG00000008364	Cat	-3.66587	0.890865	K03781|1|0.0|1107|rno:24248|catalase [EC:1.11.1.6]	GO:0016020//membrane;GO:0000323//lytic vacuole;GO:0005740//mitochondrial envelope;GO:0044439	GO:0016811//hydrolase activity, acting on carbon-nitrogen (but not peptide) bonds, in linear amides;GO:0000166//nucleotide binding;GO:0004601//peroxidase activity;GO:0042802//identical protein binding;GO:0005506//iron ion binding	GO:0016125//sterol metabolic process;GO:0006639//acylglycerol metabolic process;GO:0042743//hydrogen peroxide metabolic process;GO:0051091//positive regulation of sequence-specific DNA binding transcription factor activity;GO:0009411//response to UV;GO:0043433//negative regulation of sequence-specific DNA binding transcription factor activity;GO:0051259//protein oligomerization;GO:0009967//positi…	gi|6978607|ref|NP_036652.1|/0/catalase [Rattus norvegicus]
ENSRNOG00000019861	Tollip	-3.82319	0.82038	K05402|1|4e-125|450|rno:361677|toll-interacting protein	GO:0043235//receptor complex;GO:0044444//cytoplasmic part	GO:0060089;GO:0005102//receptor binding;GO:0019899//enzyme binding	GO:0001775//cell activation;GO:0006952//defense response;GO:0007165//signal transduction;GO:0006796//phosphate-containing compound metabolic process;GO:0007154//cell communication	gi|157823763|ref|NP_001103138.1|/2.93245e-124/toll-interacting protein [Rattus norvegicus]
ENSRNOG00000019077	Lipa	-3.79431	0.837746	K01052|1|0.0|809|rno:25055|lysosomal acid lipase/cholesteryl ester hydrolase [EC:3.1.1.13]	GO:0000323//lytic vacuole	GO:0004091//carboxylesterase activity	GO:0006952//defense response;GO:0030323//respiratory tube development;GO:0006629//lipid metabolic process;GO:0006066//alcohol metabolic process;GO:0001894//tissue homeostasis;GO:0032787//monocarboxylic acid metabolic process;GO:0032989	gi|77917572|ref|NP_036864.3|/0/lysosomal acid lipase/cholesteryl ester hydrolase precursor [Rattus norvegicus]
ENSRNOG00000020005	Map2k2	-3.70312	0.875985	K04369|1|0.0|703|rno:58960|mitogen-activated protein kinase kinase 2 [EC:2.7.12.2]	GO:0044444//cytoplasmic part	GO:0004712//protein serine/threonine/tyrosine kinase activity;GO:0032559	GO:0006796//phosphate-containing compound metabolic process;GO:0002224//toll-like receptor signaling pathway;GO:0007169//transmembrane receptor protein tyrosine kinase signaling pathway;GO:0007264//small GTPase mediated signal transduction;GO:0006935//chemotaxis;GO:0006464//cellular protein modification process;GO:0000165//MAPK cascade	gi|18959214|ref|NP_579817.1|/0/dual specificity mitogen-activated protein kinase kinase 2 [Rattus norvegicus]
ENSRNOG00000006741	Podnl1	-4.65479	0.805626	K08764|1|2e-121|437|cfa:479564|sterol carrier protein 2 [EC:2.3.1.176]	GO:0031012//extracellular matrix	-	-	gi|392334331|ref|XP_001068151.3|/0/PREDICTED: podocan-like protein 1-like [Rattus norvegicus]
ENSRNOG00000018114	Acadvl	-3.85824	0.896531	K09479|1|0.0|1204|rno:25363|very long chain acyl-CoA dehydrogenase [EC:1.3.99.-]	GO:0019866//organelle inner membrane;GO:0005759//mitochondrial matrix	GO:0003995//acyl-CoA dehydrogenase activity;GO:0050662//coenzyme binding;GO:0005504//fatty acid binding	GO:0000038//very long-chain fatty acid metabolic process;GO:0045922//negative regulation of fatty acid metabolic process;GO:0006091//generation of precursor metabolites and energy;GO:0031327;GO:0006635//fatty acid beta-oxidation;GO:0048871//multicellular organismal homeostasis;GO:0008203//cholesterol metabolic process	gi|56541110|gb|AAH87036.1|/0/Acyl-Coenzyme A dehydrogenase, very long chain [Rattus norvegicus]
ENSRNOG00000001440	Mdh2	-4.68405	0.935138	K00026|1|9e-180|630|rno:81829|malate dehydrogenase [EC:1.1.1.37]	GO:0031981//nuclear lumen;GO:0019866//organelle inner membrane;GO:0044429//mitochondrial part	GO:0016615//malate dehydrogenase activity;GO:0005515//protein binding	GO:0043648//dicarboxylic acid metabolic process;GO:0009060//aerobic respiration;GO:0019674//NAD metabolic process;GO:0006006//glucose metabolic process	gi|42476181|ref|NP_112413.2|/7.3293e-179/malate dehydrogenase, mitochondrial precursor [Rattus norvegicus]
ENSRNOG00000014948	Osgin1	-3.40336	0.87113	-	-	GO:0005102//receptor binding	GO:0032501//multicellular organismal process;GO:0016049//cell growth;GO:0050789//regulation of biological process;GO:0048869//cellular developmental process	gi|19923094|ref|NP_612513.1|/0/oxidative stress-induced growth inhibitor 1 [Rattus norvegicus]
ENSRNOG00000028384	Npepl1	-3.83703	0.87689	K09611|1|0.0|903|mmu:228961|probable aminopeptidase NPEPL1 [EC:3.4.11.-]	GO:0044424//intracellular part	GO:0046914//transition metal ion binding;GO:0008237//metallopeptidase activity;GO:0008238//exopeptidase activity	GO:0019538//protein metabolic process	gi|354468753|ref|XP_003496816.1|/0/PREDICTED: probable aminopeptidase NPEPL1 [Cricetulus griseus]
ENSRNOG00000022069	Hand2	3.46343	0.851436	K09071|1|4e-43|172|bta:781874|heart-and neural crest derivatives-expressed protein	GO:0043231//intracellular membrane-bounded organelle;GO:0043234//protein complex	GO:0003712//transcription cofactor activity;GO:0001071//nucleic acid binding transcription factor activity;GO:0046983//protein dimerization activity;GO:0042802//identical protein binding;GO:0008134//transcription factor binding	GO:0006357//regulation of transcription from RNA polymerase II promoter;GO:0012501//programmed cell death;GO:0043009//chordate embryonic development;GO:0014031//mesenchymal cell development;GO:0003143//embryonic heart tube morphogenesis;GO:0048646//anatomical structure formation involved in morphogenesis	gi|471414967|ref|XP_004389014.1|/4.00095e-42/PREDICTED: heart- and neural crest derivatives-expressed protein 2 [Trichechus manatus latirostris]
ENSRNOG00000000842	Ddah2	-3.28388	0.822002	K01482|1|7e-129|461|rno:294239|dimethylargininase [EC:3.5.3.18]	GO:0044424//intracellular part	GO:0016813//hydrolase activity, acting on carbon-nitrogen (but not peptide) bonds, in linear amidines;GO:0031406//carboxylic acid binding	GO:0006575//cellular modified amino acid metabolic process;GO:0044271//cellular nitrogen compound biosynthetic process;GO:0007165//signal transduction;GO:0043066//negative regulation of apoptotic process;GO:0006525//arginine metabolic process	gi|344239177|gb|EGV95280.1|/1.47662e-134/N(G),N(G)-dimethylarginine dimethylaminohydrolase 2 [Cricetulus griseus]
ENSRNOG00000011933	Csnk2a2	-2.97449	0.810249	K03097|1|0.0|671|rno:307641|casein kinase II subunit alpha [EC:2.7.11.1]	GO:0043234//protein complex;GO:0044444//cytoplasmic part	GO:0004672//protein kinase activity;GO:0005515//protein binding;GO:0032559	GO:0007049//cell cycle;GO:0006796//phosphate-containing compound metabolic process;GO:0006935//chemotaxis;GO:0007166//cell surface receptor signaling pathway;GO:0006464//cellular protein modification process	gi|195540240|gb|AAI68200.1|/0/Casein kinase 2, alpha prime polypeptide [Rattus norvegicus]
ENSRNOG00000000541	Glo1	-3.58185	0.877312	K01759|1|8e-106|384|rno:294320|lactoylglutathione lyase [EC:4.4.1.5]	-	GO:0043169//cation binding;GO:0016846//carbon-sulfur lyase activity	GO:0006790//sulfur compound metabolic process;GO:0043066//negative regulation of apoptotic process;GO:0006081//cellular aldehyde metabolic process;GO:0044238//primary metabolic process	gi|46485429|ref|NP_997477.1|/6.76143e-105/lactoylglutathione lyase [Rattus norvegicus]
ENSRNOG00000001171	Coq5	-3.40366	0.83089	K06127|1|0.0|666|rno:304542|ubiquinone biosynthesis methyltransferase [EC:2.1.1.201]	GO:0043231//intracellular membrane-bounded organelle	GO:0016741	GO:0006743//ubiquinone metabolic process;GO:0006730//one-carbon metabolic process	gi|84781656|ref|NP_001034111.1|/0/2-methoxy-6-polyprenyl-1,4-benzoquinol methylase, mitochondrial precursor [Rattus norvegicus]
ENSRNOG00000003942	Asnsd1	-2.93501	0.830279	-	-	GO:0016884//carbon-nitrogen ligase activity, with glutamine as amido-N-donor	GO:0009064//glutamine family amino acid metabolic process;GO:0006528//asparagine metabolic process	gi|157823035|ref|NP_001100233.1|/0/asparagine synthetase domain-containing protein 1 [Rattus norvegicus]
ENSRNOG00000014188	Tma16	3.81901	0.828626	K14860|1|3e-125|448|rno:290686|translation machinery-associated protein 16	-	-	-	gi|281182657|ref|NP_001162573.1|/2.43904e-124/uncharacterized protein LOC290686 [Rattus norvegicus]
ENSRNOG00000007325	Usp28	-3.18935	0.815367	K11849|1|0.0|2060|rno:315639|ubiquitin carboxyl-terminal hydrolase 25/28 [EC:3.1.2.15]	GO:0031981//nuclear lumen;GO:0031981//nuclear lumen	GO:0005488//binding;GO:0016790//thiolester hydrolase activity;GO:0019783//small conjugating protein-specific protease activity;GO:0005488//binding;GO:0016790//thiolester hydrolase activity;GO:0019783//small conjugating protein-specific protease activity	GO:0009314//response to radiation;GO:0006259//DNA metabolic process;GO:0019941//modification-dependent protein catabolic process;GO:0008630//intrinsic apoptotic signaling pathway in response to DNA damage response;GO:0070646//protein modification by small protein removal;GO:0009314//response to radiation;GO:0006259//DNA metabolic process;GO:0019941//modification-dependent protein catabolic proces…	gi|164456210|dbj|BAF97608.1|/0/deubiquitinating enzyme [Rattus norvegicus]
ENSRNOG00000011142	Cyb5b	-3.76197	0.827562	K10226|1|2e-10|68.9|tgu:100222881|fatty acid desaturase 2 (delta-6 desaturase) [EC:1.14.19.-];K10595|2|3e-10|68.6|tad:TRIADDRAFT_56425|E3 ubiquitin-protein ligase HERC2 [EC:6.3.2.19];K10224|4|3e-10|68.6|xtr:100489232|fatty acid desaturase 1 (delta-5 desaturase) [EC:1.14.19.-]	GO:0019866//organelle inner membrane;GO:0031224//intrinsic to membrane;GO:0031966//mitochondrial membrane	GO:0009055//electron carrier activity;GO:0005506//iron ion binding;GO:0030234//enzyme regulator activity	GO:0019222//regulation of metabolic process;GO:0051234//establishment of localization;GO:0006091//generation of precursor metabolites and energy	gi|13399338|ref|NP_085075.1|/2.11912e-81/cytochrome b5 type B precursor [Rattus norvegicus]
ENSRNOG00000021442	Hddc2	3.54653	0.803309	K07023|1|6e-108|390|rno:361462|putative hydrolases of HD superfamily	GO:0043231//intracellular membrane-bounded organelle	GO:0042578//phosphoric ester hydrolase activity;GO:0043169//cation binding	-	gi|157823683|ref|NP_001101930.1|/4.69867e-107/HD domain-containing protein 2 [Rattus norvegicus]
ENSRNOG00000004726	Mapkapk2	-3.255	0.871172	K04443|1|6e-176|618|rno:289014|mitogen-activated protein kinase-activated protein kinase 2 [EC:2.7.11.1]	GO:0031981//nuclear lumen;GO:0044444//cytoplasmic part	GO:0060089;GO:0004672//protein kinase activity;GO:0032559	GO:0043488//regulation of mRNA stability;GO:0006796//phosphate-containing compound metabolic process;GO:0009058//biosynthetic process;GO:0002224//toll-like receptor signaling pathway;GO:0007169//transmembrane receptor protein tyrosine kinase signaling pathway;GO:0007264//small GTPase mediated signal transduction;GO:0006464//cellular protein modification process;GO:0006691//leukotriene metabolic p…	gi|30017431|ref|NP_835203.1|/4.76287e-175/MAP kinase-activated protein kinase 2 [Rattus norvegicus]
ENSRNOG00000009399	RGD1311224	-4.59821	0.815178	K10226|1|4e-166|585|gga:423122|fatty acid desaturase 2 (delta-6 desaturase) [EC:1.14.19.-]	GO:0043231//intracellular membrane-bounded organelle;GO:0031224//intrinsic to membrane	GO:0005506//iron ion binding;GO:0016705//oxidoreductase activity, acting on paired donors, with incorporation or reduction of molecular oxygen	GO:0051234//establishment of localization;GO:0006631//fatty acid metabolic process;GO:0006091//generation of precursor metabolites and energy	gi|149022448|gb|EDL79342.1|/0/rCG26407 [Rattus norvegicus]
ENSRNOG00000031479	Hdlbp	-3.57929	0.87451	K12886|1|2e-07|60.1|xtr:394952|heterogeneous nuclear ribonucleoprotein K;K13210|4|1e-06|57.4|mdo:100031718|far upstream element-binding protein	GO:0034358//plasma lipoprotein particle;GO:0043231//intracellular membrane-bounded organelle;GO:0016020//membrane	GO:0003676//nucleic acid binding	GO:0010876;GO:0051234//establishment of localization;GO:0016125//sterol metabolic process	gi|148708011|gb|EDL39958.1|/0/high density lipoprotein (HDL) binding protein, isoform CRA_h [Mus musculus]
ENSRNOG00000011008	Bet1	3.61197	0.806805	K08504|1|2e-44|181|rno:29631|blocked early in transport 1	GO:0012505//endomembrane system;GO:0043234//protein complex;GO:0005795//Golgi stack;GO:0031090//organelle membrane;GO:0031224//intrinsic to membrane	GO:0005488//binding	GO:0048193//Golgi vesicle transport;GO:0006906//vesicle fusion	gi|344270376|ref|XP_003407021.1|/1.98881e-45/PREDICTED: hypothetical protein LOC100668898 [Loxodonta africana]
ENSRNOG00000021024	Pi4kb	-3.34289	0.807195	K00888|1|0.0|1573|rno:81747|phosphatidylinositol 4-kinase [EC:2.7.1.67]	GO:0031966//mitochondrial membrane;GO:0005789//endoplasmic reticulum membrane	GO:0001727//lipid kinase activity;GO:0032559	GO:0046488//phosphatidylinositol metabolic process;GO:0046474//glycerophospholipid biosynthetic process;GO:0006796//phosphate-containing compound metabolic process;GO:0048017//inositol lipid-mediated signaling;GO:0006897//endocytosis	gi|14389295|ref|NP_112345.1|/0/phosphatidylinositol 4-kinase beta [Rattus norvegicus]
ENSRNOG00000018207	Dynlt1	2.98715	0.818295	K10420|1|2e-60|232|rno:83462|dynein light chain Tctex-type 1	GO:0043231//intracellular membrane-bounded organelle;GO:0030286//dynein complex	GO:0005515//protein binding;GO:0003774//motor activity	GO:0048731;GO:0033043//regulation of organelle organization;GO:0006886//intracellular protein transport;GO:0040001//establishment of mitotic spindle localization;GO:0010721//negative regulation of cell development;GO:0048858//cell projection morphogenesis;GO:0007186//G-protein coupled receptor signaling pathway;GO:0022415;GO:0051704;GO:0000087//M phase of mitotic cell cycle;GO:0032319//regulation…	gi|13786138|ref|NP_112608.1|/1.34181e-59/dynein light chain Tctex-type 1 [Rattus norvegicus]
ENSRNOG00000011283	Acn9	2.90265	0.811018	-	GO:0005740//mitochondrial envelope;GO:0005740//mitochondrial envelope	-	GO:0006094//gluconeogenesis	gi|114145668|ref|NP_001041379.1|/1.05743e-58/protein ACN9 homolog, mitochondrial [Rattus norvegicus]
ENSRNOG00000021794	Znhit2	3.58998	0.816462	-	-	-	-	gi|157820909|ref|NP_001101044.1|/0/zinc finger HIT domain-containing protein 2 [Rattus norvegicus]
ENSRNOG00000018809	Psmd5	-3.85664	0.8644	K06692|1|0.0|910|mmu:66998|26S proteasome non-ATPase regulatory subunit 5	GO:0005838//proteasome regulatory particle	GO:0005488//binding	GO:0043161//proteasomal ubiquitin-dependent protein catabolic process;GO:0051320//S phase;GO:0007050//cell cycle arrest;GO:0016070//RNA metabolic process;GO:0051439//regulation of ubiquitin-protein ligase activity involved in mitotic cell cycle;GO:0006520//cellular amino acid metabolic process;GO:0006915//apoptotic process;GO:0030330//DNA damage response, signal transduction by p53 class mediator…	gi|348041394|ref|NP_001100039.2|/0/26S proteasome non-ATPase regulatory subunit 5 [Rattus norvegicus]
ENSRNOG00000015953	Oaz2	-3.15627	0.856797	-	GO:0043231//intracellular membrane-bounded organelle;GO:0044444//cytoplasmic part	GO:0005488//binding;GO:0004857//enzyme inhibitor activity	GO:0006576//cellular biogenic amine metabolic process;GO:0006520//cellular amino acid metabolic process	gi|158187519|ref|NP_001103369.1|/1.68037e-97/ornithine decarboxylase antizyme 2 [Rattus norvegicus]
ENSRNOG00000018755	Acss2	-3.26696	0.81583	K01895|1|0.0|1407|rno:311569|acetyl-CoA synthetase [EC:6.2.1.1]	GO:0031981//nuclear lumen;GO:0044444//cytoplasmic part	GO:0016405//CoA-ligase activity;GO:0032559	GO:0006629//lipid metabolic process;GO:0019541//propionate metabolic process;GO:0006084//acetyl-CoA metabolic process;GO:0006067//ethanol metabolic process;GO:0006083//acetate metabolic process	gi|148674180|gb|EDL06127.1|/0/acyl-CoA synthetase short-chain family member 2 [Mus musculus]
ENSRNOG00000009552	Serinc3	-3.88434	0.88383	-	GO:0031224//intrinsic to membrane;GO:0043231//intracellular membrane-bounded organelle;GO:0012505//endomembrane system	GO:0015179//L-amino acid transmembrane transporter activity	GO:0012502//induction of programmed cell death;GO:0006643//membrane lipid metabolic process;GO:0006650//glycerophospholipid metabolic process;GO:0043085//positive regulation of catalytic activity;GO:0015807//L-amino acid transport	gi|56605704|ref|NP_001008313.1|/0/serine incorporator 3 precursor [Rattus norvegicus]
ENSRNOG00000021051	Cyth2	-3.52703	0.852532	K12495|1|1e-41|171|bfo:BRAFLDRAFT_106693|IQ motif and SEC7 domain-containing protein	GO:0044424//intracellular part;GO:0016020//membrane	GO:0005083//small GTPase regulator activity;GO:0005488//binding	GO:0016192//vesicle-mediated transport;GO:0019222//regulation of metabolic process;GO:0031175//neuron projection development;GO:0007010//cytoskeleton organization;GO:0032011//ARF protein signal transduction;GO:0007155//cell adhesion	gi|332241233|ref|XP_003269786.1|/0/PREDICTED: cytohesin-2 isoform 2 [Nomascus leucogenys]
ENSRNOG00000011899	Tmem150a	-3.24544	0.842295	-	GO:0031224//intrinsic to membrane	-	GO:0008152//metabolic process	gi|20806155|ref|NP_620807.1|/1.98954e-151/transmembrane protein 150A precursor [Rattus norvegicus]
ENSRNOG00000042627	Camta1	3.75334	0.805847	-	GO:0043231//intracellular membrane-bounded organelle	GO:0005515//protein binding	GO:0006351//transcription, DNA-dependent	gi|20521670|dbj|BAA74856.3|/1.62873e-39/KIAA0833 protein [Homo sapiens]
ENSRNOG00000010034	Asah1	-2.4506	0.81682	K12348|1|0.0|790|rno:84431|acid ceramidase [EC:3.5.1.23]	GO:0000323//lytic vacuole	GO:0016811//hydrolase activity, acting on carbon-nitrogen (but not peptide) bonds, in linear amides	GO:0042221//response to chemical stimulus;GO:0030323//respiratory tube development;GO:0044238//primary metabolic process	gi|40254747|ref|NP_445859.2|/0/acid ceramidase precursor [Rattus norvegicus]
ENSRNOG00000004612	Ppp1cb	-3.65713	0.882862	K06269|1|0.0|672|acs:100552053|protein phosphatase 1, catalytic subunit [EC:3.1.3.16]	GO:0035097//histone methyltransferase complex;GO:0008287//protein serine/threonine phosphatase complex;GO:0044444//cytoplasmic part	GO:0043169//cation binding;GO:0004722//protein serine/threonine phosphatase activity	GO:0005980//glycogen catabolic process;GO:0006796//phosphate-containing compound metabolic process;GO:0006641//triglyceride metabolic process;GO:0005978//glycogen biosynthetic process;GO:0006464//cellular protein modification process	gi|50513466|pdb|1S70|A/0/Chain A, Complex Between Protein Ser/thr Phosphatase-1 (delta) And The Myosin Phosphatase Targeting Subunit 1 (mypt1)
ENSRNOG00000015857	Ctsa	-2.69486	0.824666	K13289|1|0.0|887|rno:296370|cathepsin A (carboxypeptidase C) [EC:3.4.16.5]	GO:0000323//lytic vacuole;GO:0031981//nuclear lumen	GO:0005488//binding;GO:0004180//carboxypeptidase activity	GO:0019538//protein metabolic process	gi|58865488|ref|NP_001011959.1|/0/lysosomal protective protein precursor [Rattus norvegicus]
ENSRNOG00000047922	-	2.30439	0.802256	K09228|1|3e-26|116|mmu:245174|KRAB domain-containing zinc finger protein	-	-	-	gi|149028696|gb|EDL84037.1|/1.3648e-29/rCG42233 [Rattus norvegicus]
ENSRNOG00000002342	Aldh3a2	3.97672	0.826162	K00128|1|0.0|902|rno:65183|aldehyde dehydrogenase (NAD+) [EC:1.2.1.3]	GO:0031224//intrinsic to membrane;GO:0019866//organelle inner membrane;GO:0005789//endoplasmic reticulum membrane	GO:0004030//aldehyde dehydrogenase [NAD(P)+] activity	GO:0006979//response to oxidative stress;GO:0009888//tissue development;GO:0044238//primary metabolic process;GO:0007399//nervous system development;GO:0006081//cellular aldehyde metabolic process	gi|166157462|ref|NP_113919.2|/0/fatty aldehyde dehydrogenase [Rattus norvegicus]
ENSRNOG00000048780	-	2.635	0.819959	-	-	-	-	gi|205648|gb|AAA41681.1|/7.52271e-12/neural cell adhesion molecule, partial [Rattus norvegicus]
ENSRNOG00000009088	Txnrd1	-3.0853	0.869445	K00384|1|0.0|972|rno:58819|thioredoxin reductase (NADPH) [EC:1.8.1.9]	GO:0031981//nuclear lumen;GO:0044444//cytoplasmic part	GO:0016651//oxidoreductase activity, acting on NADH or NADPH;GO:0000166//nucleotide binding;GO:0016209//antioxidant activity;GO:0050662//coenzyme binding	GO:0019725//cellular homeostasis;GO:0042743//hydrogen peroxide metabolic process;GO:0006950//response to stress;GO:0001704//formation of primary germ layer	gi|55250051|gb|AAH85726.1|/0/Txnrd1 protein [Rattus norvegicus]
ENSRNOG00000011352	Furin	-2.99961	0.81761	K01349|1|0.0|1481|rno:54281|furin [EC:3.4.21.75]	GO:0030658//transport vesicle membrane;GO:0031224//intrinsic to membrane;GO:0005795//Golgi stack;GO:0005768//endosome;GO:0005798//Golgi-associated vesicle;GO:0044421//extracellular region part	GO:0004175//endopeptidase activity;GO:0043121//neurotrophin binding;GO:0043169//cation binding;GO:0004866//endopeptidase inhibitor activity;GO:0019899//enzyme binding	GO:0007179//transforming growth factor beta receptor signaling pathway;GO:0006518//peptide metabolic process;GO:0031330;GO:0032900//negative regulation of neurotrophin production;GO:0007169//transmembrane receptor protein tyrosine kinase signaling pathway;GO:0019058//viral infectious cycle;GO:0031331;GO:0016486//peptide hormone processing;GO:0018200;GO:0016477//cell migration;GO:0046903//secretio…	gi|149057322|gb|EDM08645.1|/0/rCG24589, isoform CRA_a [Rattus norvegicus]
ENSRNOG00000013949	Idh2	-4.83749	0.942784	K00031|1|0.0|934|rno:361596|isocitrate dehydrogenase [EC:1.1.1.42]	GO:0019866//organelle inner membrane;GO:0044429//mitochondrial part	GO:0046872//metal ion binding;GO:0004448//isocitrate dehydrogenase activity;GO:0000166//nucleotide binding	GO:0050896//response to stimulus;GO:0043648//dicarboxylic acid metabolic process;GO:0044262//cellular carbohydrate metabolic process;GO:0009060//aerobic respiration	gi|62079055|ref|NP_001014183.1|/0/isocitrate dehydrogenase [NADP], mitochondrial precursor [Rattus norvegicus]
ENSRNOG00000049530	-	3.53837	0.81384	-	-	-	-	gi|149048237|gb|EDM00813.1|/1.5578e-41/rCG62717 [Rattus norvegicus]
ENSRNOG00000015072	Ptgr1	-3.93962	0.899711	K13948|1|8e-179|626|rno:192227|rostaglandin reductase 1 [EC:1.3.1.74 1.3.1.48]	GO:0044424//intracellular part	GO:0046914//transition metal ion binding;GO:0016628//oxidoreductase activity, acting on the CH-CH group of donors, NAD or NADP as acceptor;GO:0016616//oxidoreductase activity, acting on the CH-OH group of donors, NAD or NADP as acceptor	GO:0006690//icosanoid metabolic process;GO:0042221//response to chemical stimulus	gi|20302022|ref|NP_620218.1|/6.77309e-178/prostaglandin reductase 1 [Rattus norvegicus]
ENSRNOG00000043060	Dnajc4	-3.23769	0.842464	K09524|1|5e-117|421|rno:361717|DnaJ homolog subfamily C member 4	GO:0031224//intrinsic to membrane;GO:0043231//intracellular membrane-bounded organelle	GO:0005515//protein binding	GO:0044267//cellular protein metabolic process	gi|61557260|ref|NP_001013214.1|/4.28652e-116/dnaJ homolog subfamily C member 4 [Rattus norvegicus]
ENSRNOG00000011745	Psma1	-3.60142	0.88203	K02725|1|7e-141|500|cfa:476867|20S proteasome subunit alpha 6 [EC:3.4.25.1]	GO:0043231//intracellular membrane-bounded organelle;GO:0005839//proteasome core complex;GO:0030529//ribonucleoprotein complex	GO:0004175//endopeptidase activity;GO:0003676//nucleic acid binding	GO:0043161//proteasomal ubiquitin-dependent protein catabolic process;GO:0051320//S phase;GO:0002437//inflammatory response to antigenic stimulus;GO:0007050//cell cycle arrest;GO:0016070//RNA metabolic process;GO:0051439//regulation of ubiquitin-protein ligase activity involved in mitotic cell cycle;GO:0006520//cellular amino acid metabolic process;GO:0006915//apoptotic process;GO:0030330//DNA da…	gi|8394060|ref|NP_058974.1|/5.86031e-140/proteasome subunit alpha type-1 [Rattus norvegicus]
ENSRNOG00000018567	Slc20a1	-3.20712	0.817221	K14640|1|0.0|1359|rno:81826|solute carrier family 20 (sodium-dependent phosphate transporter)	GO:0016021//integral to membrane	GO:0004871//signal transducer activity;GO:0005436//sodium:phosphate symporter activity	GO:0035725//sodium ion transmembrane transport;GO:0006793//phosphorus metabolic process;GO:0007249//I-kappaB kinase/NF-kappaB cascade;GO:0006817//phosphate ion transport	gi|25742611|ref|NP_112410.1|/0/sodium-dependent phosphate transporter 1 [Rattus norvegicus]
ENSRNOG00000013011	Dnajb4	-3.18546	0.865938	K09510|1|0.0|650|rno:295549|DnaJ homolog subfamily B member 4	GO:0016020//membrane;GO:0044424//intracellular part	GO:0005515//protein binding	GO:0044267//cellular protein metabolic process;GO:0006950//response to stress	gi|61556870|ref|NP_001013094.1|/0/dnaJ homolog subfamily B member 4 [Rattus norvegicus]
ENSRNOG00000019246	Psme2	-2.88293	0.84655	K06697|1|6e-116|418|rno:29614|proteasome activator subunit 2 (PA28 beta)	GO:0022624//proteasome accessory complex	GO:0061135	GO:0019882//antigen processing and presentation;GO:0043161//proteasomal ubiquitin-dependent protein catabolic process;GO:0051320//S phase;GO:0007050//cell cycle arrest;GO:0016070//RNA metabolic process;GO:0051439//regulation of ubiquitin-protein ligase activity involved in mitotic cell cycle;GO:0006520//cellular amino acid metabolic process;GO:0006915//apoptotic process;GO:0030330//DNA damage res…	gi|8394091|ref|NP_058953.1|/4.79419e-115/proteasome activator complex subunit 2 [Rattus norvegicus]
ENSRNOG00000016770	Calm3	-3.2003	0.857144	K02183|1|6e-84|300|ptr:456153|calmodulin	GO:0031981//nuclear lumen;GO:0005815//microtubule organizing center;GO:0005819//spindle;GO:0008287//protein serine/threonine phosphatase complex;GO:0031674//I band;GO:0016020//membrane	GO:0047485//protein N-terminus binding;GO:0046872//metal ion binding;GO:0016772//transferase activity, transferring phosphorus-containing groups;GO:0019900//kinase binding;GO:0008092//cytoskeletal protein binding;GO:0016247//channel regulator activity;GO:0016791//phosphatase activity	GO:0001775//cell activation;GO:0014808//release of sequestered calcium ion into cytosol by sarcoplasmic reticulum;GO:0003012//muscle system process;GO:0019318//hexose metabolic process;GO:0007169//transmembrane receptor protein tyrosine kinase signaling pathway;GO:0032414//positive regulation of ion transmembrane transporter activity;GO:0051899//membrane depolarization;GO:0006887//exocytosis;GO:0…	gi|351697936|gb|EHB00855.1|/3.12895e-79/Calmodulin [Heterocephalus glaber]
ENSRNOG00000020623	Aldh16a1	-4.57923	0.826235	K00128|1|1e-173|611|xla:734715|aldehyde dehydrogenase (NAD+) [EC:1.2.1.3]	-	GO:0005488//binding;GO:0003824//catalytic activity	GO:0008152//metabolic process	gi|76096352|ref|NP_001028878.1|/0/aldehyde dehydrogenase family 16 member A1 [Rattus norvegicus]
ENSRNOG00000013577	Kdelr3	3.34391	0.802803	K10949|1|1e-93|343|rno:315131|ER lumen protein retaining receptor	GO:0031090//organelle membrane;GO:0043231//intracellular membrane-bounded organelle;GO:0031224//intrinsic to membrane	GO:0005048//signal sequence binding;GO:0004871//signal transducer activity	GO:0035437//maintenance of protein localization in endoplasmic reticulum;GO:0006810//transport;GO:0023052//signaling	gi|189011703|ref|NP_001121018.1|/8.40963e-93/ER lumen protein retaining receptor 3 [Rattus norvegicus]
ENSRNOG00000017596	Txnl4a	3.03844	0.847392	K12859|1|7e-25|112|mgp:100542679|U5 snRNP protein, DIM1 family	GO:0030532//small nuclear ribonucleoprotein complex;GO:0031981//nuclear lumen;GO:0030532//small nuclear ribonucleoprotein complex;GO:0031981//nuclear lumen	GO:0005488//binding;GO:0005488//binding	GO:0000087//M phase of mitotic cell cycle;GO:0000398//mRNA splicing, via spliceosome;GO:0000087//M phase of mitotic cell cycle;GO:0000398//mRNA splicing, via spliceosome	gi|109255210|ref|NP_848719.2|/8.28613e-32/thioredoxin-like protein 4A isoform b [Mus musculus]
ENSRNOG00000015273	Ak3	-2.85751	0.854775	K00944|1|1e-124|446|mmu:56248|nucleoside-triphosphate--adenylate kinase [EC:2.7.4.10]	GO:0044429//mitochondrial part	GO:0016776//phosphotransferase activity, phosphate group as acceptor;GO:0032561//guanyl ribonucleotide binding;GO:0005515//protein binding;GO:0019205//nucleobase-containing compound kinase activity;GO:0032559	GO:0006796//phosphate-containing compound metabolic process;GO:0006754//ATP biosynthetic process;GO:0007599//hemostasis	gi|40352787|gb|AAH64656.1|/1.12785e-126/Ak3 protein [Rattus norvegicus]
ENSRNOG00000009338	Kras	3.36898	0.800286	K07827|1|3e-87|322|ptr:473387|GTPase KRas	GO:0043231//intracellular membrane-bounded organelle;GO:0044425//membrane part;GO:0043231//intracellular membrane-bounded organelle;GO:0044425//membrane part	GO:0032561//guanyl ribonucleotide binding;GO:0017111//nucleoside-triphosphatase activity;GO:0019904//protein domain specific binding;GO:0032561//guanyl ribonucleotide binding;GO:0017111//nucleoside-triphosphatase activity;GO:0019904//protein domain specific binding	GO:0043405//regulation of MAP kinase activity;GO:0007010//cytoskeleton organization;GO:0042692//muscle cell differentiation;GO:0051091//positive regulation of sequence-specific DNA binding transcription factor activity;GO:0007169//transmembrane receptor protein tyrosine kinase signaling pathway;GO:0009207;GO:0031960//response to corticosteroid stimulus;GO:0016601//Rac protein signal transduction;…	gi|327195100|gb|AEA35014.1|/8.21113e-100/UBE2L3/KRAS fusion protein [Homo sapiens]
ENSRNOG00000046561	Podn	-4.12548	0.808427	K08764|1|0.0|867|cfa:479564|sterol carrier protein 2 [EC:2.3.1.176]	GO:0031012//extracellular matrix;GO:0044424//intracellular part	GO:0005515//protein binding	GO:0016477//cell migration;GO:0008283//cell proliferation	gi|32526861|ref|NP_766462.2|/0/podocan precursor [Mus musculus]
ENSRNOG00000023095	Npepps	-3.39194	0.845623	K08776|1|0.0|1716|rno:50558|puromycin-sensitive aminopeptidase [EC:3.4.11.-]	GO:0044444//cytoplasmic part;GO:0043231//intracellular membrane-bounded organelle	GO:0046914//transition metal ion binding;GO:0008238//exopeptidase activity	GO:0019538//protein metabolic process	gi|158749540|ref|NP_536320.1|/0/puromycin-sensitive aminopeptidase precursor [Rattus norvegicus]
ENSRNOG00000008945	Nans	-3.86377	0.829595	K05304|1|0.0|727|rno:298071|sialic acid synthase [EC:2.5.1.56 2.5.1.57]	GO:0044444//cytoplasmic part	GO:0016765//transferase activity, transferring alkyl or aryl (other than methyl) groups;GO:0070567	GO:0005975//carbohydrate metabolic process;GO:0008610//lipid biosynthetic process	gi|164663874|ref|NP_001100125.2|/0/N-acetylneuraminic acid synthase [Rattus norvegicus]
ENSRNOG00000039877	Smim11	2.95613	0.838652	-	GO:0031224//intrinsic to membrane	-	-	gi|196114854|ref|NP_001124472.1|/2.11063e-23/small integral membrane protein 11 [Rattus norvegicus]
ENSRNOG00000021705	Zfp664	3.36037	0.826119	K09228|1|4e-98|357|mmu:626316|KRAB domain-containing zinc finger protein	GO:0043231//intracellular membrane-bounded organelle	GO:0046914//transition metal ion binding;GO:0003676//nucleic acid binding	GO:0006351//transcription, DNA-dependent	gi|440898311|gb|ELR49836.1|/1.04959e-164/Zinc finger protein 664, partial [Bos grunniens mutus]
ENSRNOG00000021042	Psmd4	-3.15771	0.864148	K03029|1|0.0|641|rno:83499|26S proteasome regulatory subunit N10	GO:0044424//intracellular part;GO:0043234//protein complex	GO:0046914//transition metal ion binding	GO:0006810//transport;GO:0043161//proteasomal ubiquitin-dependent protein catabolic process;GO:0051320//S phase;GO:0006259//DNA metabolic process;GO:0007050//cell cycle arrest;GO:0016070//RNA metabolic process;GO:0051439//regulation of ubiquitin-protein ligase activity involved in mitotic cell cycle;GO:0006520//cellular amino acid metabolic process;GO:0006915//apoptotic process;GO:0030330//DNA da…	gi|13786158|ref|NP_112621.1|/0/26S proteasome non-ATPase regulatory subunit 4 [Rattus norvegicus]
ENSRNOG00000014330	Pcmt1	-3.77653	0.879091	K00573|1|2e-138|492|mmu:18537|protein-L-isoaspartate(D-aspartate) O-methyltransferase [EC:2.1.1.77]	GO:0043231//intracellular membrane-bounded organelle	GO:0005515//protein binding;GO:0003824//catalytic activity	GO:0006790//sulfur compound metabolic process;GO:0008213;GO:0006575//cellular modified amino acid metabolic process	gi|149039523|gb|EDL93685.1|/1.04849e-138/protein-L-isoaspartate (D-aspartate) O-methyltransferase 1, isoform CRA_d [Rattus norvegicus]
ENSRNOG00000012709	Bag2	-3.92239	0.875806	K09556|1|3e-91|336|rno:690038|BCL2-associated athanogene 2	-	GO:0005488//binding	GO:0044267//cellular protein metabolic process;GO:0012501//programmed cell death	gi|189491875|ref|NP_001121667.1|/2.50756e-90/BAG family molecular chaperone regulator 2 [Rattus norvegicus]
ENSRNOG00000049306	-	2.98973	0.824203	-	GO:0043231//intracellular membrane-bounded organelle	GO:0050136//NADH dehydrogenase (quinone) activity	-	gi|74151372|dbj|BAE38806.1|/2.85773e-81/unnamed protein product [Mus musculus]
ENSRNOG00000015295	Ctdsp1	-2.68416	0.839884	K15731|1|2e-146|520|rno:363249|carboxy-terminal domain RNA polymerase II polypeptide A small phosphatase [EC:3.1.3.16]	GO:0043231//intracellular membrane-bounded organelle	GO:0043169//cation binding;GO:0004722//protein serine/threonine phosphatase activity	GO:0006464//cellular protein modification process;GO:0006796//phosphate-containing compound metabolic process;GO:0006355//regulation of transcription, DNA-dependent	gi|189303571|ref|NP_001121551.1|/1.3014e-145/carboxy-terminal domain RNA polymerase II polypeptide A small phosphatase 1 [Rattus norvegicus]
ENSRNOG00000000379	Dnajc12	-3.20739	0.83882	K09532|1|4e-114|411|rno:619393|DnaJ homolog subfamily C member 12	-	GO:0005515//protein binding	GO:0044267//cellular protein metabolic process	gi|77404371|ref|NP_001029204.1|/3.56475e-113/dnaJ homolog subfamily C member 12 [Rattus norvegicus]
ENSRNOG00000050231	Gng12	3.17623	0.822518	K04347|1|1e-33|141|rno:114120|guanine nucleotide-binding protein G(I)/G(S)/G(O) subunit gamma-12	GO:0031234//extrinsic to internal side of plasma membrane;GO:0015629//actin cytoskeleton	GO:0043168;GO:0060089	GO:0021543//pallium development;GO:0007267//cell-cell signaling;GO:0033762//response to glucagon stimulus;GO:0015980//energy derivation by oxidation of organic compounds;GO:0002237//response to molecule of bacterial origin;GO:0007166//cell surface receptor signaling pathway	gi|387157889|ref|NP_446113.1|/9.96439e-33/guanine nucleotide-binding protein G(I)/G(S)/G(O) subunit gamma-12 [Rattus norvegicus]
ENSRNOG00000020897	Prpf19	-3.12449	0.853553	K10599|1|0.0|981|rno:246216|pre-mRNA-processing factor 19 [EC:6.3.2.19]	GO:0015630//microtubule cytoskeleton;GO:0005681//spliceosomal complex;GO:0016604//nuclear body;GO:0043234//protein complex;GO:0044444//cytoplasmic part	GO:0005515//protein binding;GO:0003676//nucleic acid binding;GO:0004842//ubiquitin-protein ligase activity	GO:0045596//negative regulation of cell differentiation;GO:0006259//DNA metabolic process;GO:0045687//positive regulation of glial cell differentiation;GO:0000398//mRNA splicing, via spliceosome;GO:0016567//protein ubiquitination;GO:0006629//lipid metabolic process;GO:0001832//blastocyst growth;GO:0033554//cellular response to stress	gi|148709445|gb|EDL41391.1|/0/PRP19/PSO4 pre-mRNA processing factor 19 homolog (S. cerevisiae), isoform CRA_a [Mus musculus]
ENSRNOG00000007114	Psma6	-2.09161	0.840084	K02730|1|1e-139|496|ecb:100050805|20S proteasome subunit alpha 1 [EC:3.4.25.1]	GO:0034399//nuclear periphery;GO:0005839//proteasome core complex;GO:0030016//myofibril;GO:0030529//ribonucleoprotein complex	GO:0004175//endopeptidase activity;GO:0032555;GO:0003676//nucleic acid binding;GO:0008134//transcription factor binding	GO:0043161//proteasomal ubiquitin-dependent protein catabolic process;GO:0051091//positive regulation of sequence-specific DNA binding transcription factor activity;GO:0051320//S phase;GO:0007050//cell cycle arrest;GO:0051439//regulation of ubiquitin-protein ligase activity involved in mitotic cell cycle;GO:0006520//cellular amino acid metabolic process;GO:0006915//apoptotic process;GO:0030330//D…	gi|403263938|ref|XP_003924255.1|/2.01793e-140/PREDICTED: proteasome subunit alpha type-6-like isoform 1 [Saimiri boliviensis boliviensis]
ENSRNOG00000007235	Atp5g1	-1.54874	0.817284	K02128|1|2e-47|188|rno:29754|F-type H+-transporting ATPase subunit c [EC:3.6.3.14]	GO:0005753//mitochondrial proton-transporting ATP synthase complex;GO:0033177//proton-transporting two-sector ATPase complex, proton-transporting domain	GO:0015078//hydrogen ion transmembrane transporter activity	GO:0046034//ATP metabolic process;GO:0034220//ion transmembrane transport;GO:0015992//proton transport;GO:0010033//response to organic substance	gi|74204278|dbj|BAE39897.1|/1.74452e-46/unnamed protein product [Mus musculus]
ENSRNOG00000011904	Trappc4	3.64899	0.838093	-	GO:0043005//neuron projection;GO:0044459//plasma membrane part;GO:0030136//clathrin-coated vesicle;GO:0005801//cis-Golgi network	GO:0005488//binding	GO:0031175//neuron projection development;GO:0048193//Golgi vesicle transport	gi|71051670|gb|AAH98628.1|/5.81139e-121/Trafficking protein particle complex 4 [Rattus norvegicus]
ENSRNOG00000019459	Oaz1	-2.37351	0.853343	K12752|1|4e-15|82.8|ame:551149|myosin light chain, invertebrate	GO:0044444//cytoplasmic part	GO:0005488//binding;GO:0004857//enzyme inhibitor activity	GO:0019222//regulation of metabolic process;GO:0006595//polyamine metabolic process;GO:0006520//cellular amino acid metabolic process	gi|23397676|ref|NP_620781.1|/2.29702e-129/ornithine decarboxylase antizyme 1 [Rattus norvegicus]
ENSRNOG00000000611	Ube2d1	2.16143	0.807406	K06689|1|1e-52|204|tgu:100221279|ubiquitin-conjugating enzyme E2 D/E [EC:6.3.2.19]	GO:0031981//nuclear lumen;GO:0044444//cytoplasmic part	GO:0032559;GO:0019787//small conjugating protein ligase activity	GO:0000209//protein polyubiquitination;GO:0043161//proteasomal ubiquitin-dependent protein catabolic process;GO:0007178//transmembrane receptor protein serine/threonine kinase signaling pathway;GO:0045841//negative regulation of mitotic metaphase/anaphase transition;GO:0007050//cell cycle arrest;GO:0051439//regulation of ubiquitin-protein ligase activity involved in mitotic cell cycle	gi|410975165|ref|XP_003994005.1|/5.07983e-53/PREDICTED: ubiquitin-conjugating enzyme E2 S-like [Felis catus]
ENSRNOG00000005355	Ncstn	-2.95634	0.802414	K06171|1|0.0|1380|rno:289231|nicastrin	GO:0005764//lysosome;GO:0016021//integral to membrane;GO:0048770	GO:0005488//binding;GO:0016787//hydrolase activity	GO:0006917//induction of apoptosis;GO:0044267//cellular protein metabolic process;GO:0006516//glycoprotein catabolic process;GO:0007169//transmembrane receptor protein tyrosine kinase signaling pathway;GO:0051604//protein maturation;GO:0044093;GO:0033619//membrane protein proteolysis	gi|27819651|ref|NP_777353.1|/0/nicastrin precursor [Rattus norvegicus]
ENSRNOG00000011413	Scp2	-3.40767	0.873784	K08764|1|0.0|1043|rno:25541|sterol carrier protein 2 [EC:2.3.1.176]	GO:0031981//nuclear lumen;GO:0044439	GO:0005496//steroid binding;GO:0016408	GO:0006996//organelle organization;GO:0006732//coenzyme metabolic process;GO:0006635//fatty acid beta-oxidation;GO:0010876;GO:0051234//establishment of localization;GO:0006694//steroid biosynthetic process	gi|202553|gb|AAA40622.1|/0/60 kDa protein [Rattus norvegicus]
ENSRNOG00000000511	Srpk1	-3.48545	0.825393	K15409|1|0.0|1161|rno:361811|serine/threonine-protein kinase SRPK1 [EC:2.7.11.1]	GO:0043231//intracellular membrane-bounded organelle	GO:0004672//protein kinase activity;GO:0046872//metal ion binding;GO:0032559	GO:0048869//cellular developmental process;GO:0006396//RNA processing;GO:0035556//intracellular signal transduction;GO:0006796//phosphate-containing compound metabolic process;GO:0051704;GO:0010468//regulation of gene expression;GO:0006464//cellular protein modification process	gi|71043650|ref|NP_001020897.1|/0/serine/threonine-protein kinase SRPK1 [Rattus norvegicus]
ENSRNOG00000019730	Inppl1	-3.54012	0.833323	K15909|1|0.0|1940|rno:65038|phosphatidylinositol-3,4,5-trisphosphate 5-phosphatase 2 [EC:3.1.3.86]	GO:0016020//membrane;GO:0031252//cell leading edge;GO:0030864//cortical actin cytoskeleton	GO:0046030//inositol trisphosphate phosphatase activity;GO:0035091//phosphatidylinositol binding;GO:0008092//cytoskeletal protein binding;GO:0019904//protein domain specific binding	GO:0007417//central nervous system development;GO:0010467//gene expression;GO:0043647//inositol phosphate metabolic process;GO:0009968//negative regulation of signal transduction;GO:0008283//cell proliferation;GO:0010975//regulation of neuron projection development;GO:0030036//actin cytoskeleton organization;GO:0016192//vesicle-mediated transport;GO:0043434//response to peptide hormone stimulus;G…	gi|12621112|ref|NP_075233.1|/0/phosphatidylinositol 3,4,5-trisphosphate 5-phosphatase 2 isoform 1 [Rattus norvegicus]
ENSRNOG00000021265	Cds2	-3.36734	0.850931	K00981|1|0.0|882|rno:114101|phosphatidate cytidylyltransferase [EC:2.7.7.41]	GO:0019866//organelle inner membrane;GO:0043231//intracellular membrane-bounded organelle;GO:0031224//intrinsic to membrane	GO:0070567	GO:0006644//phospholipid metabolic process	gi|149023367|gb|EDL80261.1|/0/CDP-diacylglycerol synthase (phosphatidate cytidylyltransferase) 2 [Rattus norvegicus]
ENSRNOG00000045898	-	3.12463	0.82138	-	-	-	-	gi|444517808|gb|ELV11804.1|/1.55378e-33/NudC domain-containing protein 3 [Tupaia chinensis]
ENSRNOG00000012748	Vamp8	3.93047	0.86122	K08512|1|2e-39|160|rno:83730|vesicle-associated membrane protein 8	GO:0031224//intrinsic to membrane;GO:0005764//lysosome;GO:0043234//protein complex;GO:0005770//late endosome	GO:0000149//SNARE binding	GO:0016044//cellular membrane organization;GO:0048193//Golgi vesicle transport;GO:0065003	gi|13929182|ref|NP_114015.1|/1.58645e-38/vesicle-associated membrane protein 8 [Rattus norvegicus]
ENSRNOG00000016781	Ppib	-3.58711	0.860567	K03768|1|4e-109|395|mmu:19035|peptidyl-prolyl cis-trans isomerase B (cyclophilin B) [EC:5.2.1.8]	GO:0044432//endoplasmic reticulum part;GO:0048770	GO:0016859//cis-trans isomerase activity;GO:0005515//protein binding	GO:0046907//intracellular transport;GO:0044267//cellular protein metabolic process	gi|215274190|sp|P24368.3|PPIB_RAT/3.23889e-112/RecName: Full=Peptidyl-prolyl cis-trans isomerase B; Short=PPIase B; AltName: Full=CYP-S1; AltName: Full=Cyclophilin B; AltName: Full=Rotamase B; AltName: Full=S-cyclophilin; Short=SCYLP; Flags: Precursor
ENSRNOG00000008746	Dtd1	3.59634	0.819306	K07560|1|5e-95|348|rno:362227|D-tyrosyl-tRNA(Tyr) deacylase [EC:3.1.-.-]	GO:0044424//intracellular part;GO:0044424//intracellular part	GO:0016787//hydrolase activity;GO:0016787//hydrolase activity	GO:0009063//cellular amino acid catabolic process;GO:0009063//cellular amino acid catabolic process	gi|166796825|gb|AAI59414.1|/7.58008e-114/Dtd1 protein [Rattus norvegicus]
ENSRNOG00000026905	Ppm1g	-3.29669	0.850784	K01090|1|0.0|937|rno:259229|protein phosphatase [EC:3.1.3.16]	GO:0043234//protein complex;GO:0043231//intracellular membrane-bounded organelle	GO:0043169//cation binding;GO:0004721//phosphoprotein phosphatase activity	GO:0006464//cellular protein modification process;GO:0006796//phosphate-containing compound metabolic process;GO:0022402//cell cycle process	gi|22219444|ref|NP_671742.1|/0/protein phosphatase 1G [Rattus norvegicus]
ENSRNOG00000039265	Psmg4	2.46183	0.824666	K11878|1|1e-64|245|rno:689623|proteasome assembly chaperone 4	-	-	-	gi|193788622|ref|NP_001123351.1|/9.90525e-64/proteasome (prosome, macropain) assembly chaperone 4 [Rattus norvegicus]
ENSRNOG00000010239	Cnbp	-3.27282	0.878049	K09250|1|1e-101|370|mdo:100028365|cellular nucleic acid-binding protein	GO:0043231//intracellular membrane-bounded organelle;GO:0044444//cytoplasmic part	GO:0003723//RNA binding;GO:0046914//transition metal ion binding;GO:0001071//nucleic acid binding transcription factor activity;GO:0043566//structure-specific DNA binding	GO:0006357//regulation of transcription from RNA polymerase II promoter;GO:0008283//cell proliferation;GO:0008203//cholesterol metabolic process	gi|148666815|gb|EDK99231.1|/1.14028e-113/cellular nucleic acid binding protein, isoform CRA_d [Mus musculus]
ENSRNOG00000018345	Abce1	-2.4319	0.820864	K06174|1|0.0|1129|rno:361390|ATP-binding cassette, sub-family E, member 1	GO:0043231//intracellular membrane-bounded organelle	GO:0017111//nucleoside-triphosphatase activity;GO:0004857//enzyme inhibitor activity;GO:0051540;GO:0032559	GO:0051707//response to other organism;GO:0016070//RNA metabolic process;GO:0009207	gi|431918297|gb|ELK17524.1|/0/ATP-binding cassette sub-family E member 1 [Pteropus alecto]
ENSRNOG00000003177	Mat2b	-2.93135	0.829742	K00789|1|0.0|673|rno:683630|S-adenosylmethionine synthetase [EC:2.5.1.6]	GO:0043231//intracellular membrane-bounded organelle;GO:0043234//protein complex;GO:0044444//cytoplasmic part	GO:0005488//binding;GO:0016616//oxidoreductase activity, acting on the CH-OH group of donors, NAD or NADP as acceptor;GO:0030234//enzyme regulator activity	GO:0009108//coenzyme biosynthetic process;GO:0019222//regulation of metabolic process;GO:0006730//one-carbon metabolic process;GO:0033692//cellular polysaccharide biosynthetic process	gi|112983992|ref|NP_001037747.1|/0/methionine adenosyltransferase 2 subunit beta [Rattus norvegicus]
ENSRNOG00000013360	Prkcsh	-3.45163	0.850752	K08288|1|0.0|823|rno:300445|protein kinase C substrate 80K-H	GO:0044432//endoplasmic reticulum part;GO:0043234//protein complex;GO:0016020//membrane	GO:0016772//transferase activity, transferring phosphorus-containing groups;GO:0003676//nucleic acid binding;GO:0046872//metal ion binding;GO:0019901//protein kinase binding	GO:0006952//defense response;GO:0035556//intracellular signal transduction;GO:0051259//protein oligomerization;GO:0006796//phosphate-containing compound metabolic process;GO:0006487//protein N-linked glycosylation	gi|157818781|ref|NP_001100276.1|/0/glucosidase 2 subunit beta precursor [Rattus norvegicus]
ENSRNOG00000012084	Xpnpep1	-3.57474	0.841506	K01262|1|0.0|1305|mcc:696570|Xaa-Pro aminopeptidase [EC:3.4.11.9]	GO:0044444//cytoplasmic part	GO:0042802//identical protein binding;GO:0046914//transition metal ion binding;GO:0004177//aminopeptidase activity;GO:0008237//metallopeptidase activity	GO:0019538//protein metabolic process;GO:0043171//peptide catabolic process	gi|149040371|gb|EDL94409.1|/0/X-prolyl aminopeptidase (aminopeptidase P) 1, soluble, isoform CRA_a [Rattus norvegicus]
ENSRNOG00000001088	Rfc3	3.77828	0.803814	K10756|1|0.0|711|rno:288414|replication factor C subunit 3/5	GO:0031981//nuclear lumen;GO:0005657//replication fork	GO:0017111//nucleoside-triphosphatase activity;GO:0032559;GO:0003677//DNA binding	GO:0006261//DNA-dependent DNA replication;GO:0017085//response to insecticide;GO:0051320//S phase;GO:0007050//cell cycle arrest;GO:0009207;GO:0006289//nucleotide-excision repair;GO:0000723//telomere maintenance	gi|57526873|ref|NP_001009629.1|/0/replication factor C subunit 3 [Rattus norvegicus]
ENSRNOG00000006593	Grpel1	-3.65317	0.875953	K03687|1|1e-99|364|rno:79563|molecular chaperone GrpE	GO:0044429//mitochondrial part	GO:0030554//adenyl nucleotide binding;GO:0042802//identical protein binding	GO:0044267//cellular protein metabolic process;GO:0019222//regulation of metabolic process;GO:0006626//protein targeting to mitochondrion	gi|13324704|ref|NP_077813.1|/7.67987e-99/grpE protein homolog 1, mitochondrial precursor [Rattus norvegicus]
ENSRNOG00000016496	Ctsc	-2.96965	0.820454	K01275|1|0.0|959|rno:25423|cathepsin C [EC:3.4.14.1]	GO:0000323//lytic vacuole	GO:0004175//endopeptidase activity;GO:0005515//protein binding;GO:0043168	GO:0019538//protein metabolic process;GO:0032502//developmental process;GO:0002376//immune system process;GO:0042221//response to chemical stimulus	gi|8393218|ref|NP_058793.1|/0/dipeptidyl peptidase 1 precursor [Rattus norvegicus]
ENSRNOG00000001852	ERGIC2	3.41617	0.840716	-	GO:0031224//intrinsic to membrane;GO:0043231//intracellular membrane-bounded organelle	-	GO:0006810//transport	gi|68163399|ref|NP_001020155.1|/2.39467e-55/endoplasmic reticulum-Golgi intermediate compartment protein 2 [Rattus norvegicus]
ENSRNOG00000024602	Plekha7	-4.0589	0.821738	K06082|1|4e-07|56.2|dre:567490|FERM, RhoGEF and pleckstrin domain protein 2;K03426|5|2e-06|53.9|ssc:100512459|NAD+ diphosphatase [EC:3.6.1.22]	GO:0005815//microtubule organizing center;GO:0005913//cell-cell adherens junction	GO:0005515//protein binding	GO:0016337//cell-cell adhesion;GO:0045217//cell-cell junction maintenance	gi|221554497|ref|NP_001138333.1|/1.11715e-151/pleckstrin homology domain containing, family A member 7 [Rattus norvegicus]
ENSRNOG00000039091	Pnpla8	-3.31032	0.839905	K01047|1|3e-24|115|ame:410570|phospholipase A2 [EC:3.1.1.4]	GO:0031224//intrinsic to membrane;GO:0031090//organelle membrane;GO:0012505//endomembrane system;GO:0044439	GO:0004623//phospholipase A2 activity;GO:0032559	GO:0006629//lipid metabolic process;GO:0032787//monocarboxylic acid metabolic process	gi|392340992|ref|XP_003754218.1|/0/PREDICTED: calcium-independent phospholipase A2-gamma [Rattus norvegicus]
ENSRNOG00000014190	Hint3	3.30529	0.810007	K10863|1|9e-11|68.2|tgu:100226520|aprataxin [EC:3.-.-.-]	GO:0031981//nuclear lumen	GO:0003824//catalytic activity	-	gi|451172109|ref|NP_001094295.1|/7.46545e-100/histidine triad nucleotide-binding protein 3 isoform 1 [Rattus norvegicus]
ENSRNOG00000011523	H2afy	2.50704	0.800118	K11251|1|8e-173|607|rno:29384|histone H2A	GO:0005815//microtubule organizing center;GO:0000228//nuclear chromosome;GO:0000785//chromatin;GO:0005815//microtubule organizing center;GO:0000228//nuclear chromosome;GO:0000785//chromatin	GO:0003676//nucleic acid binding;GO:0003676//nucleic acid binding	GO:0040029//regulation of gene expression, epigenetic;GO:0034728//nucleosome organization;GO:0040029//regulation of gene expression, epigenetic;GO:0034728//nucleosome organization	gi|8393519|ref|NP_058878.1|/6.22648e-172/core histone macro-H2A.1 [Rattus norvegicus]
ENSRNOG00000011821	S100a4	1.77144	0.8063	-	GO:0043231//intracellular membrane-bounded organelle;GO:0042995//cell projection;GO:0044444//cytoplasmic part	GO:0046872//metal ion binding;GO:0042802//identical protein binding;GO:0005102//receptor binding;GO:0046983//protein dimerization activity	GO:0007249//I-kappaB kinase/NF-kappaB cascade;GO:0000904//cell morphogenesis involved in differentiation	gi|6981326|ref|NP_036750.1|/1.01912e-41/protein S100-A4 [Rattus norvegicus]
ENSRNOG00000012067	Fam111a	-3.2015	0.851542	-	-	GO:0004175//endopeptidase activity	GO:0019538//protein metabolic process	gi|157821173|ref|NP_001102633.1|/0/uncharacterized protein LOC499322 [Rattus norvegicus]
ENSRNOG00000025701	Mki67ip	-3.20059	0.850952	K14838|1|6e-138|491|rno:246042|nucleolar protein 15	GO:0000228//nuclear chromosome	GO:0003676//nucleic acid binding	GO:0016070//RNA metabolic process	gi|144226217|ref|NP_631925.2|/4.82641e-137/MKI67 FHA domain-interacting nucleolar phosphoprotein [Rattus norvegicus]
ENSRNOG00000014178	Acad9	-3.74735	0.858334	K15980|1|0.0|1195|rno:294973|Acyl-CoA dehydrogenase family member 9 [EC:1.3.99.-]	GO:0043231//intracellular membrane-bounded organelle	GO:0016627//oxidoreductase activity, acting on the CH-CH group of donors;GO:0050662//coenzyme binding	GO:0008152//metabolic process	gi|197313734|ref|NP_861433.2|/0/acyl-CoA dehydrogenase family member 9, mitochondrial [Rattus norvegicus]
ENSRNOG00000047970	LYRM4	2.59309	0.807479	-	GO:0043231//intracellular membrane-bounded organelle	-	-	gi|149045200|gb|EDL98286.1|/7.2503e-44/rCG44066 [Rattus norvegicus]
ENSRNOG00000005357	Ctc1	-3.67887	0.800023	-	GO:0000783//nuclear telomere cap complex	GO:0043566//structure-specific DNA binding	GO:0006259//DNA metabolic process	gi|157822211|ref|NP_001100480.1|/0/CST complex subunit CTC1 [Rattus norvegicus]
ENSRNOG00000028087	1110058L19Rik	3.40353	0.850615	-	GO:0043231//intracellular membrane-bounded organelle	-	-	gi|149069177|gb|EDM18618.1|/2.40119e-55/rCG43539, isoform CRA_a [Rattus norvegicus]
ENSRNOG00000020385	Fads3	-3.64711	0.843991	K10225|1|0.0|863|rno:286922|fatty acid desaturase 3 (delta-6 desaturase) [EC:1.14.19.-]	GO:0031090//organelle membrane;GO:0043231//intracellular membrane-bounded organelle;GO:0031224//intrinsic to membrane	GO:0005506//iron ion binding;GO:0016705//oxidoreductase activity, acting on paired donors, with incorporation or reduction of molecular oxygen	GO:0051234//establishment of localization;GO:0006631//fatty acid metabolic process;GO:0006091//generation of precursor metabolites and energy	gi|74181920|dbj|BAE32659.1|/0/unnamed protein product [Mus musculus]
ENSRNOG00000002983	Nfix	-3.44939	0.830195	K09171|1|0.0|838|rno:81524|nuclear factor I/X	GO:0043231//intracellular membrane-bounded organelle	GO:0003676//nucleic acid binding;GO:0000981//sequence-specific DNA binding RNA polymerase II transcription factor activity	GO:0006259//DNA metabolic process;GO:0000122//negative regulation of transcription from RNA polymerase II promoter	gi|56549649|ref|NP_002492.2|/0/nuclear factor 1 X-type isoform 2 [Homo sapiens]
ENSRNOG00000001142	Prkab1	-3.14572	0.831469	K07199|1|1e-148|527|rno:83803|5'-AMP-activated protein kinase, regulatory beta subunit	GO:0043231//intracellular membrane-bounded organelle;GO:0043234//protein complex;GO:0044444//cytoplasmic part	GO:0004674//protein serine/threonine kinase activity;GO:0019900//kinase binding	GO:0022402//cell cycle process;GO:0051259//protein oligomerization;GO:0006796//phosphate-containing compound metabolic process;GO:0007169//transmembrane receptor protein tyrosine kinase signaling pathway;GO:0019217//regulation of fatty acid metabolic process	gi|22096326|sp|P80386.4|AAKB1_RAT/1.37772e-148/RecName: Full=5'-AMP-activated protein kinase subunit beta-1; Short=AMPK subunit beta-1; Short=AMPKb; AltName: Full=5'-AMP-activated protein kinase 40 kDa subunit
ENSRNOG00000016356	Got1	-3.72508	0.891982	K14454|1|0.0|835|rno:24401|aspartate aminotransferase, cytoplasmic [EC:2.6.1.1]	GO:0000323//lytic vacuole;GO:0033267//axon part	GO:0008483//transaminase activity;GO:0016831//carboxy-lyase activity;GO:0048037//cofactor binding	GO:0006103//2-oxoglutarate metabolic process;GO:0006071//glycerol metabolic process;GO:0009064//glutamine family amino acid metabolic process;GO:0031960//response to corticosteroid stimulus;GO:0032868//response to insulin stimulus;GO:0055088//lipid homeostasis;GO:0006531//aspartate metabolic process	gi|401461792|ref|NP_036703.2|/0/aspartate aminotransferase, cytoplasmic [Rattus norvegicus]
ENSRNOG00000005798	Cav3	-3.57683	0.874394	K12959|1|5e-86|318|rno:29161|caveolin 3	GO:0031224//intrinsic to membrane;GO:0043234//protein complex;GO:0012505//endomembrane system;GO:0043231//intracellular membrane-bounded organelle;GO:0044459//plasma membrane part;GO:0042383//sarcolemma;GO:0045202//synapse;GO:0031674//I band	GO:0019899//enzyme binding;GO:0016247//channel regulator activity	GO:0032769//negative regulation of monooxygenase activity;GO:0006639//acylglycerol metabolic process;GO:0003009//skeletal muscle contraction;GO:0043405//regulation of MAP kinase activity;GO:0033673//negative regulation of kinase activity;GO:0007009//plasma membrane organization;GO:0055092//sterol homeostasis;GO:0055117//regulation of cardiac muscle contraction;GO:0048869//cellular developmental p…	gi|9506465|ref|NP_062028.1|/3.8724e-85/caveolin-3 [Rattus norvegicus]
ENSRNOG00000003729	Drg2	2.87485	0.811165	K06944|1|0.0|655|mmu:13495|	GO:0043231//intracellular membrane-bounded organelle	GO:0032561//guanyl ribonucleotide binding	GO:0023052//signaling	gi|10946678|ref|NP_067329.1|/0/developmentally-regulated GTP-binding protein 2 [Mus musculus]
ENSRNOG00000026982	1190007I07Rik	3.21003	0.835882	-	-	-	-	gi|207438640|ref|NP_001129038.1|/1.58064e-22/uncharacterized protein LOC691921 precursor [Rattus norvegicus]
ENSRNOG00000031769	Chchd7	2.78066	0.82257	-	GO:0043231//intracellular membrane-bounded organelle	-	-	gi|31088924|ref|NP_852056.1|/5.10593e-45/coiled-coil-helix-coiled-coil-helix domain-containing protein 7 [Mus musculus]
ENSRNOG00000033915	Gpt	-3.54655	0.811502	K00814|1|0.0|974|rno:81670|alanine transaminase [EC:2.6.1.2]	GO:0044444//cytoplasmic part	GO:0048037//cofactor binding;GO:0016846//carbon-sulfur lyase activity;GO:0047635	GO:0006006//glucose metabolic process;GO:0006520//cellular amino acid metabolic process	gi|13591961|ref|NP_112301.1|/0/alanine aminotransferase 1 [Rattus norvegicus]
ENSRNOG00000017945	Serf1	2.27478	0.803941	-	-	-	GO:0048731	gi|293345137|ref|XP_001070716.2|/4.42748e-25/PREDICTED: small EDRK-rich factor 1 [Rattus norvegicus]
ENSRNOG00000008103	Mdh1	-4.63716	0.933422	K00025|1|2e-176|619|rno:24551|malate dehydrogenase [EC:1.1.1.37]	GO:0005815//microtubule organizing center;GO:0043231//intracellular membrane-bounded organelle	GO:0016615//malate dehydrogenase activity;GO:0000166//nucleotide binding	GO:0043648//dicarboxylic acid metabolic process;GO:0009060//aerobic respiration;GO:0019674//NAD metabolic process;GO:0006006//glucose metabolic process	gi|148675904|gb|EDL07851.1|/4.79918e-180/malate dehydrogenase 1, NAD (soluble), isoform CRA_c [Mus musculus]
ENSRNOG00000006589	Mif	-1.97672	0.835429	K07253|1|2e-62|238|rno:81683|phenylpyruvate tautomerase [EC:5.3.2.1]	GO:0043231//intracellular membrane-bounded organelle;GO:0044421//extracellular region part	GO:0005102//receptor binding;GO:0016863//intramolecular oxidoreductase activity, transposing C=C bonds;GO:0016862//intramolecular oxidoreductase activity, interconverting keto- and enol-groups	GO:0010467//gene expression;GO:0001976//neurological system process involved in regulation of systemic arterial blood pressure;GO:0050707//regulation of cytokine secretion;GO:0034614//cellular response to reactive oxygen species;GO:0006915//apoptotic process;GO:0010737//protein kinase A signaling cascade;GO:0008284//positive regulation of cell proliferation;GO:0043434//response to peptide hormone…	gi|13591985|ref|NP_112313.1|/1.32091e-61/macrophage migration inhibitory factor [Rattus norvegicus]
ENSRNOG00000024140	Sft2d1	2.03774	0.801003	-	GO:0031224//intrinsic to membrane	-	GO:0006810//transport	gi|56605628|ref|NP_001008303.1|/9.95266e-84/vesicle transport protein SFT2A [Rattus norvegicus]
ENSRNOG00000014613	Ddah1	-2.95885	0.8069	K01482|1|3e-160|566|rno:64157|dimethylargininase [EC:3.5.3.18]	GO:0043231//intracellular membrane-bounded organelle	GO:0016813//hydrolase activity, acting on carbon-nitrogen (but not peptide) bonds, in linear amidines;GO:0046914//transition metal ion binding;GO:0031406//carboxylic acid binding	GO:0006575//cellular modified amino acid metabolic process;GO:0031328//positive regulation of cellular biosynthetic process;GO:0044271//cellular nitrogen compound biosynthetic process;GO:0007165//signal transduction;GO:0045765//regulation of angiogenesis;GO:0006525//arginine metabolic process;GO:0006464//cellular protein modification process	gi|11560131|ref|NP_071633.1|/2.50455e-159/N(G),N(G)-dimethylarginine dimethylaminohydrolase 1 [Rattus norvegicus]
ENSRNOG00000020853	Scap	-3.62736	0.812776	K10260|1|4e-17|92.0|pon:100173626|F-box and WD-40 domain protein 7	GO:0032991//macromolecular complex;GO:0030134//ER to Golgi transport vesicle;GO:0031224//intrinsic to membrane;GO:0031090//organelle membrane;GO:0012505//endomembrane system	GO:0005515//protein binding;GO:0032934//sterol binding	GO:0016125//sterol metabolic process;GO:0006633//fatty acid biosynthetic process;GO:0043434//response to peptide hormone stimulus;GO:0010894//negative regulation of steroid biosynthetic process;GO:0010870//positive regulation of receptor biosynthetic process;GO:0032502//developmental process	gi|155369287|ref|NP_001094436.1|/0/sterol regulatory element-binding protein cleavage-activating protein [Rattus norvegicus]
ENSRNOG00000008689	Cbx1	2.38231	0.812113	K11585|1|8e-45|179|rno:360609|chromobox protein 1	GO:0015630//microtubule cytoskeleton;GO:0000790//nuclear chromatin;GO:0045120//pronucleus;GO:0000775//chromosome, centromeric region;GO:0015630//microtubule cytoskeleton;GO:0000790//nuclear chromatin;GO:0045120//pronucleus;GO:0000775//chromosome, centromeric region	GO:0005515//protein binding;GO:0005515//protein binding	GO:0006355//regulation of transcription, DNA-dependent;GO:0006355//regulation of transcription, DNA-dependent;GO:0006325//chromatin organization	gi|149054003|gb|EDM05820.1|/1.07433e-47/rCG35120, isoform CRA_b [Rattus norvegicus]
ENSRNOG00000037627	Trappc1	2.18876	0.807658	-	GO:0005801//cis-Golgi network	GO:0005488//binding	GO:0048193//Golgi vesicle transport	gi|66730565|ref|NP_001019377.1|/2.13108e-80/trafficking protein particle complex subunit 1 [Mus musculus]
ENSRNOG00000017297	Cab39	-3.30685	0.83842	K08272|1|7e-159|404|gga:424830|calcium binding protein 39	GO:0032991//macromolecular complex;GO:0044444//cytoplasmic part	GO:0004672//protein kinase activity;GO:0046872//metal ion binding;GO:0019899//enzyme binding	GO:0022402//cell cycle process;GO:0051259//protein oligomerization;GO:0007169//transmembrane receptor protein tyrosine kinase signaling pathway;GO:0019217//regulation of fatty acid metabolic process	gi|148708308|gb|EDL40255.1|/1.69465e-162/calcium binding protein 39, isoform CRA_b [Mus musculus]
ENSRNOG00000012966	Acadl	-4.58489	0.931147	K00255|1|0.0|832|rno:25287|long-chain-acyl-CoA dehydrogenase [EC:1.3.99.13]	GO:0005740//mitochondrial envelope	GO:0003997//acyl-CoA oxidase activity;GO:0050662//coenzyme binding;GO:0005504//fatty acid binding;GO:0003995//acyl-CoA dehydrogenase activity	GO:0006635//fatty acid beta-oxidation;GO:0001676//long-chain fatty acid metabolic process;GO:0031327;GO:0009437//carnitine metabolic process;GO:0008203//cholesterol metabolic process;GO:0006579//amino-acid betaine catabolic process;GO:0051260//protein homooligomerization;GO:0045922//negative regulation of fatty acid metabolic process;GO:0048871//multicellular organismal homeostasis	gi|6978431|ref|NP_036951.1|/0/long-chain specific acyl-CoA dehydrogenase, mitochondrial precursor [Rattus norvegicus]
ENSRNOG00000003951	Psmc1	-3.65635	0.882862	K03062|1|0.0|783|cfa:100688636|26S proteasome regulatory subunit T2	GO:0031981//nuclear lumen;GO:0043234//protein complex	GO:0017111//nucleoside-triphosphatase activity;GO:0032559	GO:0043161//proteasomal ubiquitin-dependent protein catabolic process;GO:0051320//S phase;GO:0007050//cell cycle arrest;GO:0016070//RNA metabolic process;GO:0009207;GO:0051439//regulation of ubiquitin-protein ligase activity involved in mitotic cell cycle;GO:0006520//cellular amino acid metabolic process;GO:0006915//apoptotic process;GO:0030330//DNA damage response, signal transduction by p53 cla…	gi|431839200|gb|ELK01127.1|/0/26S protease regulatory subunit 4 [Pteropus alecto]
ENSRNOG00000018487	Slc3a2	-3.81903	0.883757	K06519|1|0.0|911|rno:50567|solute carrier family 3, member 2	GO:0031224//intrinsic to membrane;GO:0044459//plasma membrane part;GO:0048770	GO:0015081//sodium ion transmembrane transporter activity;GO:0015171//amino acid transmembrane transporter activity;GO:0043167//ion binding	GO:0015801//aromatic amino acid transport;GO:0015820//leucine transport;GO:0044238//primary metabolic process;GO:0040007//growth;GO:0002376//immune system process;GO:0006807//nitrogen compound metabolic process;GO:0007599//hemostasis;GO:0070838//divalent metal ion transport	gi|402743472|ref|NP_062156.2|/0/4F2 cell-surface antigen heavy chain isoform 1 [Rattus norvegicus]
ENSRNOG00000010458	PIK3CA	-3.58335	0.801361	K00922|1|0.0|2162|rno:170911|phosphatidylinositol-4,5-bisphosphate 3-kinase [EC:2.7.1.153]	GO:0031252//cell leading edge;GO:0043234//protein complex;GO:0044444//cytoplasmic part	GO:0005515//protein binding;GO:0035004//phosphatidylinositol 3-kinase activity;GO:0032559	GO:0007243//intracellular protein kinase cascade;GO:0007599//hemostasis;GO:0048017//inositol lipid-mediated signaling;GO:0050851//antigen receptor-mediated signaling pathway;GO:0006796//phosphate-containing compound metabolic process;GO:0007169//transmembrane receptor protein tyrosine kinase signaling pathway;GO:0046488//phosphatidylinositol metabolic process;GO:0031294;GO:0019318//hexose metabol…	gi|282158067|ref|NP_596890.2|/0/phosphatidylinositol-4,5-bisphosphate 3-kinase catalytic subunit alpha isoform [Rattus norvegicus]
ENSRNOG00000019618	Hdac3	-3.40432	0.814388	K11404|1|0.0|808|mmu:15183|histone deacetylase 3 [EC:3.5.1.98]	GO:0031981//nuclear lumen;GO:0044427//chromosomal part;GO:0005819//spindle	GO:0003712//transcription cofactor activity;GO:0003676//nucleic acid binding;GO:0017136//NAD-dependent histone deacetylase activity;GO:0019899//enzyme binding	GO:0000278//mitotic cell cycle;GO:0000122//negative regulation of transcription from RNA polymerase II promoter;GO:0042221//response to chemical stimulus;GO:0006476//protein deacetylation;GO:0043409//negative regulation of MAPK cascade;GO:0007051//spindle organization;GO:0010830//regulation of myotube differentiation;GO:0007169//transmembrane receptor protein tyrosine kinase signaling pathway;GO:…	gi|89257352|ref|NP_034541.2|/0/histone deacetylase 3 [Mus musculus]
ENSRNOG00000003343	Canx	-3.17988	0.863905	K08054|1|0.0|1023|rno:29144|calnexin	GO:0031224//intrinsic to membrane;GO:0044432//endoplasmic reticulum part;GO:0030425//dendrite;GO:0044297//cell body;GO:0031090//organelle membrane;GO:0030529//ribonucleoprotein complex;GO:0048770	GO:0046872//metal ion binding;GO:0035254//glutamate receptor binding;GO:0030246//carbohydrate binding	GO:0044267//cellular protein metabolic process;GO:0032502//developmental process	gi|25282419|ref|NP_742005.1|/0/calnexin precursor [Rattus norvegicus]
ENSRNOG00000013802	Slc25a36l1	3.21677	0.80432	K15116|1|4e-174|610|rno:686689|solute carrier family 25, member 33/36	GO:0019866//organelle inner membrane;GO:0043231//intracellular membrane-bounded organelle;GO:0031224//intrinsic to membrane;GO:0031224//intrinsic to membrane;GO:0043231//intracellular membrane-bounded organelle	-	GO:0043627//response to estrogen stimulus;GO:0006810//transport;GO:0043627//response to estrogen stimulus;GO:0006810//transport	gi|26329931|dbj|BAC28704.1|/3.76981e-86/unnamed protein product [Mus musculus]
ENSRNOG00000006364	Dld	-2.33943	0.845971	K00382|1|0.0|1014|rno:298942|dihydrolipoamide dehydrogenase [EC:1.8.1.4]	GO:0001669//acrosomal vesicle;GO:0043234//protein complex;GO:0042995//cell projection;GO:0044429//mitochondrial part	GO:0000166//nucleotide binding;GO:0031405//lipoic acid binding;GO:0016668//oxidoreductase activity, acting on a sulfur group of donors, NAD or NADP as acceptor	GO:0006086//acetyl-CoA biosynthetic process from pyruvate;GO:0043648//dicarboxylic acid metabolic process;GO:0043603//cellular amide metabolic process;GO:0003006//developmental process involved in reproduction;GO:0009063//cellular amino acid catabolic process;GO:0006790//sulfur compound metabolic process;GO:0009060//aerobic respiration;GO:0006873//cellular ion homeostasis;GO:0048598//embryonic mo…	gi|40786469|ref|NP_955417.1|/0/dihydrolipoyl dehydrogenase, mitochondrial precursor [Rattus norvegicus]
ENSRNOG00000009421	Ivd	-1.57201	0.808985	K00253|1|0.0|847|rno:24513|isovaleryl-CoA dehydrogenase [EC:1.3.8.4]	GO:0005740//mitochondrial envelope	GO:0003995//acyl-CoA dehydrogenase activity;GO:0050662//coenzyme binding	GO:0006551//leucine metabolic process;GO:0051259//protein oligomerization;GO:0006635//fatty acid beta-oxidation;GO:0009063//cellular amino acid catabolic process	gi|6981112|ref|NP_036724.1|/0/isovaleryl-CoA dehydrogenase, mitochondrial precursor [Rattus norvegicus]
ENSRNOG00000005569	Phospho1	-3.17612	0.871856	K06124|1|3e-153|542|rno:287644|phosphoethanolamine/phosphocholine phosphatase [EC:3.1.3.75]	-	GO:0016791//phosphatase activity;GO:0043169//cation binding	GO:0006796//phosphate-containing compound metabolic process	gi|157786864|ref|NP_001099303.1|/2.71421e-152/phosphoethanolamine/phosphocholine phosphatase [Rattus norvegicus]
ENSRNOG00000019048	Sod2	-3.79913	0.89314	K04564|1|4e-110|399|rno:24787|superoxide dismutase, Fe-Mn family [EC:1.15.1.1]	GO:0005759//mitochondrial matrix;GO:0019866//organelle inner membrane	GO:0016209//antioxidant activity;GO:0003824//catalytic activity;GO:0005515//protein binding;GO:0003676//nucleic acid binding;GO:0046914//transition metal ion binding	GO:0033483;GO:0048468//cell development;GO:0048534;GO:0050954//sensory perception of mechanical stimulus;GO:0042391//regulation of membrane potential;GO:0055080//cation homeostasis;GO:0050931//pigment cell differentiation;GO:0022900//electron transport chain;GO:0045471//response to ethanol;GO:0031328//positive regulation of cellular biosynthetic process;GO:0051260//protein homooligomerization;GO:…	gi|8394331|ref|NP_058747.1|/2.95498e-109/superoxide dismutase [Mn], mitochondrial precursor [Rattus norvegicus]
ENSRNOG00000014785	Ykt6	3.43922	0.825003	K08516|1|1e-97|355|rno:64351|synaptobrevin homolog YKT6	GO:0043231//intracellular membrane-bounded organelle;GO:0043234//protein complex;GO:0016021//integral to membrane;GO:0044444//cytoplasmic part;GO:0012506//vesicle membrane	GO:0016409//palmitoyltransferase activity;GO:0005515//protein binding	GO:0006887//exocytosis;GO:0048193//Golgi vesicle transport;GO:0016197//endosomal transport	gi|162138924|ref|NP_113880.2|/8.95906e-97/synaptobrevin homolog YKT6 [Rattus norvegicus]
ENSRNOG00000014436	Ppip5k1	-3.58876	0.839715	K13024|1|0.0|2728|rno:311355|inositol hexakisphosphate/diphosphoinositol-pentakisphosphate kinase [EC:2.7.4.21 2.7.4.24]	GO:0044444//cytoplasmic part	GO:0016791//phosphatase activity;GO:0000828//inositol hexakisphosphate kinase activity;GO:0032559	GO:0019751//polyol metabolic process;GO:0006796//phosphate-containing compound metabolic process	gi|124244050|ref|NP_001074252.1|/0/inositol hexakisphosphate and diphosphoinositol-pentakisphosphate kinase 1 [Rattus norvegicus]
ENSRNOG00000011509	Agk	-3.51153	0.806858	K09881|1|0.0|850|rno:502749|acylglycerol kinase [EC:2.7.1.94]	GO:0005740//mitochondrial envelope	GO:0001727//lipid kinase activity;GO:0032559	GO:0007186//G-protein coupled receptor signaling pathway;GO:0016310//phosphorylation;GO:0006672//ceramide metabolic process	gi|188595700|ref|NP_001120969.1|/0/acylglycerol kinase, mitochondrial [Rattus norvegicus]
ENSRNOG00000014204	Pacsin3	-3.47943	0.868023	K10408|1|5e-78|292|tca:664324|dynein heavy chain, axonemal;K12804|3|2e-18|94.7|dre:571331|proline-serine-threonine phosphatase interacting protein 1	GO:0044431//Golgi apparatus part;GO:0016020//membrane	GO:0016772//transferase activity, transferring phosphorus-containing groups;GO:0005515//protein binding	GO:0006796//phosphate-containing compound metabolic process;GO:0031331;GO:0030100//regulation of endocytosis	gi|148695609|gb|EDL27556.1|/0/protein kinase C and casein kinase substrate in neurons 3, isoform CRA_b [Mus musculus]
ENSRNOG00000026528	Mrps33	2.19845	0.815799	K09635|1|3e-07|55.1|mdo:100031528|transmembrane protease, serine 4	GO:0043231//intracellular membrane-bounded organelle;GO:0032991//macromolecular complex	-	-	gi|114145413|ref|NP_001041328.1|/6.70839e-41/28S ribosomal protein S33, mitochondrial [Rattus norvegicus]
ENSRNOG00000014757	-	-4.27628	0.883557	K10226|1|5e-09|59.7|tgu:100222881|fatty acid desaturase 2 (delta-6 desaturase) [EC:1.14.19.-];K04257|2|7e-09|59.3|mdo:100024996|olfactory receptor;K10224|5|4e-08|56.6|xtr:100489232|fatty acid desaturase 1 (delta-5 desaturase) [EC:1.14.19.-]	GO:0031224//intrinsic to membrane;GO:0031966//mitochondrial membrane	GO:0016616//oxidoreductase activity, acting on the CH-OH group of donors, NAD or NADP as acceptor;GO:0016215;GO:0005515//protein binding;GO:0005506//iron ion binding	GO:0010038//response to metal ion;GO:0032787//monocarboxylic acid metabolic process;GO:0006091//generation of precursor metabolites and energy;GO:0051234//establishment of localization	gi|2257955|gb|AAB67609.1|/1.4486e-39/cytochrome b5 [Rattus norvegicus]
ENSRNOG00000004793	Ncln	-3.19056	0.820222	-	GO:0031090//organelle membrane;GO:0031224//intrinsic to membrane;GO:0031981//nuclear lumen	GO:0005488//binding;GO:0016787//hydrolase activity	GO:0019538//protein metabolic process;GO:0007165//signal transduction	gi|62078897|ref|NP_001014104.1|/0/nicalin precursor [Rattus norvegicus]
ENSRNOG00000018367	Taldo1	-2.9759	0.859409	K00616|1|0.0|661|rno:83688|transaldolase [EC:2.2.1.2]	GO:0044444//cytoplasmic part	GO:0016744	GO:0005997//xylulose metabolic process;GO:0006098//pentose-phosphate shunt;GO:0015980//energy derivation by oxidation of organic compounds;GO:0006000//fructose metabolic process	gi|42476292|ref|NP_113999.2|/0/transaldolase [Rattus norvegicus]
ENSRNOG00000015294	RGD1306215	3.21596	0.801118	-	-	-	-	gi|149039364|gb|EDL93584.1|/3.82003e-89/similar to hypothetical protein MGC36831 (predicted), isoform CRA_f [Rattus norvegicus]
ENSRNOG00000005981	Nt5c3a	-3.44736	0.822444	K01081|1|6e-170|577|mmu:107569|5'-nucleotidase [EC:3.1.3.5]	GO:0043231//intracellular membrane-bounded organelle;GO:0044444//cytoplasmic part	GO:0008252//nucleotidase activity;GO:0046872//metal ion binding;GO:0016740//transferase activity	GO:0006213//pyrimidine nucleoside metabolic process;GO:0006753;GO:0009112;GO:0046128;GO:0006796//phosphate-containing compound metabolic process	gi|172072627|ref|NP_080280.3|/4.8542e-169/cytosolic 5'-nucleotidase 3 isoform 1 [Mus musculus]
ENSRNOG00000002115	Sod1	-3.12381	0.873215	K04565|1|1e-86|319|rno:24786|Cu/Zn superoxide dismutase [EC:1.15.1.1]	GO:0042579//microbody;GO:0031981//nuclear lumen;GO:0032991//macromolecular complex;GO:0031982//vesicle;GO:0044429//mitochondrial part;GO:0030425//dendrite;GO:0044297//cell body;GO:0016020//membrane;GO:0044421//extracellular region part	GO:0016209//antioxidant activity;GO:0003824//catalytic activity;GO:0042802//identical protein binding;GO:0019903//protein phosphatase binding;GO:0046914//transition metal ion binding	GO:0001894//tissue homeostasis;GO:0045986//negative regulation of smooth muscle contraction;GO:0001932//regulation of protein phosphorylation;GO:0006281//DNA repair;GO:0045104//intermediate filament cytoskeleton organization;GO:0044093;GO:0014075//response to amine stimulus;GO:0022011//myelination in peripheral nervous system;GO:0006887//exocytosis;GO:0050954//sensory perception of mechanical sti…	gi|8394328|ref|NP_058746.1|/8.64493e-86/superoxide dismutase [Cu-Zn] [Rattus norvegicus]
ENSRNOG00000014050	Ptges2	-3.66376	0.844317	K05309|1|0.0|745|rno:311865|microsomal prostaglandin-E synthase 2 [EC:5.3.99.3]	GO:0031224//intrinsic to membrane;GO:0043231//intracellular membrane-bounded organelle;GO:0044444//cytoplasmic part;GO:0012505//endomembrane system	GO:0003676//nucleic acid binding;GO:0016860//intramolecular oxidoreductase activity;GO:0015036//disulfide oxidoreductase activity	GO:0006810//transport;GO:0006693//prostaglandin metabolic process;GO:0019725//cellular homeostasis;GO:0006351//transcription, DNA-dependent	gi|157822395|ref|NP_001101302.1|/0/prostaglandin E synthase 2 [Rattus norvegicus]
ENSRNOG00000003117	Psmd12	-2.7423	0.851205	K03035|1|0.0|890|rno:287772|26S proteasome regulatory subunit N5	GO:0022624//proteasome accessory complex	GO:0005488//binding	GO:0043161//proteasomal ubiquitin-dependent protein catabolic process;GO:0051320//S phase;GO:0007050//cell cycle arrest;GO:0016070//RNA metabolic process;GO:0051439//regulation of ubiquitin-protein ligase activity involved in mitotic cell cycle;GO:0006520//cellular amino acid metabolic process;GO:0006915//apoptotic process;GO:0030330//DNA damage response, signal transduction by p53 class mediator	gi|54400716|ref|NP_001005875.1|/0/26S proteasome non-ATPase regulatory subunit 12 [Rattus norvegicus]
ENSRNOG00000029077	Dpm3	3.14681	0.842274	K09659|1|4e-37|152|rno:502017|dolichyl-phosphate mannosyltransferase polypeptide 3	GO:0031501//mannosyltransferase complex;GO:0031227//intrinsic to endoplasmic reticulum membrane	GO:0005488//binding;GO:0000030//mannosyltransferase activity	GO:0010608//posttranscriptional regulation of gene expression;GO:0006497//protein lipidation;GO:0006493//protein O-linked glycosylation;GO:0018317;GO:0006487//protein N-linked glycosylation	gi|157819387|ref|NP_001102801.1|/4.22398e-36/dolichol-phosphate mannosyltransferase subunit 3 precursor [Rattus norvegicus]
ENSRNOG00000009565	Pdk4	-3.68674	0.892498	K00898|1|0.0|822|rno:89813|pyruvate dehydrogenase kinase [EC:2.7.11.2]	GO:0019866//organelle inner membrane;GO:0044429//mitochondrial part	GO:0004673//protein histidine kinase activity;GO:0032559	GO:0006468//protein phosphorylation;GO:0019318//hexose metabolic process;GO:0006086//acetyl-CoA biosynthetic process from pyruvate;GO:0022611;GO:0007165//signal transduction	gi|149064949|gb|EDM15025.1|/0/pyruvate dehydrogenase kinase, isoenzyme 4 [Rattus norvegicus]
ENSRNOG00000036696	Hgs	-3.18875	0.850604	K12182|1|0.0|1263|rno:56084|hepatocyte growth factor-regulated tyrosine kinase substrate	GO:0005771//multivesicular body;GO:0016023//cytoplasmic membrane-bounded vesicle;GO:0005769//early endosome	GO:0016772//transferase activity, transferring phosphorus-containing groups;GO:0046914//transition metal ion binding;GO:0005515//protein binding	GO:0016192//vesicle-mediated transport;GO:0007041//lysosomal transport;GO:0006796//phosphate-containing compound metabolic process;GO:0009894;GO:0008283//cell proliferation;GO:0015031//protein transport;GO:0007173//epidermal growth factor receptor signaling pathway;GO:0010741//negative regulation of intracellular protein kinase cascade	gi|77539444|ref|NP_062260.2|/0/hepatocyte growth factor-regulated tyrosine kinase substrate [Rattus norvegicus]
ENSRNOG00000009857	Ftsj3	-3.14908	0.834376	K14857|1|0.0|1241|rno:303608|AdoMet-dependent rRNA methyltransferase SPB1 [EC:2.1.1.-]	GO:0031981//nuclear lumen	GO:0008168//methyltransferase activity	GO:0006730//one-carbon metabolic process;GO:0000154//rRNA modification	gi|58865606|ref|NP_001012014.1|/0/pre-rRNA processing protein FTSJ3 [Rattus norvegicus]
ENSRNOG00000028298	-	-4.27628	0.873763	K10226|1|4e-07|53.5|xla:399058|fatty acid desaturase 2 (delta-6 desaturase) [EC:1.14.19.-]	GO:0019866//organelle inner membrane;GO:0031966//mitochondrial membrane	GO:0046872//metal ion binding;GO:0009055//electron carrier activity;GO:0030234//enzyme regulator activity	GO:0019222//regulation of metabolic process	gi|354493206|ref|XP_003508734.1|/1.11495e-44/PREDICTED: cytochrome b5 type B-like isoform 2 [Cricetulus griseus]
ENSRNOG00000017150	Med10	2.13042	0.800276	K15151|1|3e-72|272|rno:290939|mediator of RNA polymerase II transcription subunit 10	GO:0043234//protein complex;GO:0031981//nuclear lumen	-	GO:0006355//regulation of transcription, DNA-dependent;GO:0048513//organ development	gi|20070410|ref|NP_613062.1|/2.00101e-71/mediator of RNA polymerase II transcription subunit 10 [Mus musculus]
ENSRNOG00000038166	Ptgr2	-3.08737	0.844696	K13949|1|7e-177|622|mmu:77219|rostaglandin reductase 2 [EC:1.3.1.48]	GO:0043231//intracellular membrane-bounded organelle;GO:0043231//intracellular membrane-bounded organelle	GO:0016628//oxidoreductase activity, acting on the CH-CH group of donors, NAD or NADP as acceptor;GO:0046914//transition metal ion binding;GO:0016628//oxidoreductase activity, acting on the CH-CH group of donors, NAD or NADP as acceptor;GO:0046914//transition metal ion binding	GO:0008152//metabolic process;GO:0008152//metabolic process	gi|206558239|sp|Q5BK81.2|PTGR2_RAT/0/RecName: Full=Prostaglandin reductase 2; Short=PRG-2; AltName: Full=15-oxoprostaglandin 13-reductase; AltName: Full=Zinc-binding alcohol dehydrogenase domain-containing protein 1
ENSRNOG00000019028	Znrf1	2.90709	0.829047	K10694|1|2e-110|398|rno:690769|E3 ubiquitin-protein ligase ZNRF [EC:6.3.2.19]	GO:0000323//lytic vacuole;GO:0044459//plasma membrane part;GO:0008021//synaptic vesicle;GO:0000323//lytic vacuole;GO:0044459//plasma membrane part;GO:0008021//synaptic vesicle;GO:0044459//plasma membrane part;GO:0000323//lytic vacuole	GO:0046914//transition metal ion binding;GO:0003824//catalytic activity;GO:0046914//transition metal ion binding;GO:0003824//catalytic activity;GO:0046914//transition metal ion binding;GO:0003824//catalytic activity	-	gi|274321886|ref|NP_001162094.1|/3.72374e-64/E3 ubiquitin-protein ligase ZNRF1 isoform c [Mus musculus]
ENSRNOG00000030077	-	2.19336	0.816557	K13962|1|9e-06|52.4|ssc:100626316|solute carrier family 26 (anion exchange transporter), member 7	-	-	-	gi|37654224|gb|AAQ96217.1|/3.99812e-72/LRRGT00004 [Rattus norvegicus]
ENSRNOG00000013746	Senp3	-3.21567	0.82475	K08593|1|0.0|1020|rno:303245|sentrin-specific protease 3 [EC:3.4.22.-]	GO:0035097//histone methyltransferase complex	GO:0019783//small conjugating protein-specific protease activity;GO:0005488//binding	GO:0019538//protein metabolic process	gi|197382240|ref|NP_001013134.2|/0/SUMO/sentrin specific peptidase 3 [Rattus norvegicus]
ENSRNOG00000033854	Adh5	-3.40949	0.848172	K00121|1|0.0|702|rno:100145871|S-(hydroxymethyl)glutathione dehydrogenase / alcohol dehydrogenase [EC:1.1.1.284 1.1.1.1]	GO:0043231//intracellular membrane-bounded organelle	GO:0016620//oxidoreductase activity, acting on the aldehyde or oxo group of donors, NAD or NADP as acceptor;GO:0046914//transition metal ion binding;GO:0016616//oxidoreductase activity, acting on the CH-OH group of donors, NAD or NADP as acceptor;GO:0042802//identical protein binding;GO:0008289//lipid binding	GO:0044282;GO:0008217//regulation of blood pressure;GO:0006067//ethanol metabolic process;GO:0016101//diterpenoid metabolic process;GO:0002237//response to molecule of bacterial origin;GO:0017014//protein nitrosylation;GO:0032502//developmental process;GO:0006950//response to stress	gi|32264595|gb|AAP78744.1|/0/Ac1002 [Rattus norvegicus]
ENSRNOG00000002267	Chic2	3.6583	0.812334	-	GO:0016023//cytoplasmic membrane-bounded vesicle;GO:0016020//membrane	GO:0005488//binding	GO:0006892//post-Golgi vesicle-mediated transport	gi|327273700|ref|XP_003221618.1|/1.8671e-73/PREDICTED: cysteine-rich hydrophobic domain 2 protein-like [Anolis carolinensis]
ENSRNOG00000001783	Tra2b	-2.3175	0.807016	K12897|1|5e-58|226|mdo:100026641|transformer-2 protein	GO:0043231//intracellular membrane-bounded organelle	GO:0003676//nucleic acid binding	GO:0000377;GO:0006979//response to oxidative stress	gi|62087996|dbj|BAD92445.1|/3.7068e-58/splicing factor, arginine/serine-rich 10 (transformer 2 homolog, Drosophila) variant [Homo sapiens]
ENSRNOG00000006744	Acyp1	2.10913	0.800181	K01512|1|7e-52|203|rno:299203|acylphosphatase [EC:3.6.1.7]	-	GO:0016818//hydrolase activity, acting on acid anhydrides, in phosphorus-containing anhydrides	-	gi|148670916|gb|EDL02863.1|/1.28613e-57/acylphosphatase 1, erythrocyte (common) type, isoform CRA_c [Mus musculus]
ENSRNOG00000016275	Ttr	3.56142	0.825203	K07127|1|1e-17|90.1|spu:589020|5-hydroxyisourate hydrolase [EC:3.5.2.17]	GO:0044421//extracellular region part	GO:0005102//receptor binding	GO:0051234//establishment of localization;GO:0006575//cellular modified amino acid metabolic process	gi|333033763|ref|NP_036813.2|/9.23568e-71/transthyretin precursor [Rattus norvegicus]
ENSRNOG00000005418	Trap1	-3.345	0.858292	K09488|1|0.0|1380|rno:287069|TNF receptor-associated protein 1	GO:0043231//intracellular membrane-bounded organelle	GO:0032813//tumor necrosis factor receptor superfamily binding;GO:0032559	GO:0006979//response to oxidative stress;GO:0044267//cellular protein metabolic process	gi|84781723|ref|NP_001034090.1|/0/heat shock protein 75 kDa, mitochondrial precursor [Rattus norvegicus]
ENSRNOG00000016193	RGD1562114	2.73947	0.825572	-	GO:0005576//extracellular region;GO:0044424//intracellular part;GO:0031224//intrinsic to membrane	-	-	gi|157817394|ref|NP_001102753.1|/1.29407e-50/uncharacterized protein LOC500795 precursor [Rattus norvegicus]
ENSRNOG00000001736	Bdh1	-3.18724	0.822276	K00019|1|0.0|697|rno:117099|3-hydroxybutyrate dehydrogenase [EC:1.1.1.30]	GO:0019866//organelle inner membrane;GO:0044429//mitochondrial part	GO:0016616//oxidoreductase activity, acting on the CH-OH group of donors, NAD or NADP as acceptor;GO:0008289//lipid binding	GO:0007417//central nervous system development;GO:0009888//tissue development;GO:0010038//response to metal ion;GO:0043627//response to estrogen stimulus;GO:0031667//response to nutrient levels;GO:0043434//response to peptide hormone stimulus;GO:0051384//response to glucocorticoid stimulus;GO:0008152//metabolic process;GO:0006950//response to stress	gi|55742813|ref|NP_446447.2|/0/D-beta-hydroxybutyrate dehydrogenase, mitochondrial [Rattus norvegicus]
ENSRNOG00000011189	Acy1	-2.95076	0.821696	K14677|1|0.0|803|rno:300981|aminoacylase [EC:3.5.1.14]	GO:0044444//cytoplasmic part	GO:0016811//hydrolase activity, acting on carbon-nitrogen (but not peptide) bonds, in linear amides;GO:0043169//cation binding;GO:0070011	GO:0009057//macromolecule catabolic process;GO:0019538//protein metabolic process;GO:0019752//carboxylic acid metabolic process	gi|81884653|sp|Q6AYS7.1|ACY1A_RAT/0/RecName: Full=Aminoacylase-1A; Short=ACY-1A; AltName: Full=ACY IA; AltName: Full=N-acyl-L-amino-acid amidohydrolase
ENSRNOG00000009422	Hmgcl	-2.95682	0.813661	K01640|1|0.0|637|rno:79238|hydroxymethylglutaryl-CoA lyase [EC:4.1.3.4]	GO:0019866//organelle inner membrane;GO:0044429//mitochondrial part	GO:0043169//cation binding;GO:0016833//oxo-acid-lyase activity;GO:0005504//fatty acid binding	GO:0033993//response to lipid;GO:0044249//cellular biosynthetic process;GO:0006996//organelle organization;GO:0031667//response to nutrient levels;GO:0006732//coenzyme metabolic process;GO:0048513//organ development;GO:0006950//response to stress;GO:0043438//acetoacetic acid metabolic process	gi|13242293|ref|NP_077362.1|/0/hydroxymethylglutaryl-CoA lyase, mitochondrial precursor [Rattus norvegicus]
ENSRNOG00000003139	Smc1a	-3.82003	0.830806	K06636|1|0.0|1991|cfa:480928|structural maintenance of chromosome 1	GO:0000776//kinetochore;GO:0000228//nuclear chromosome;GO:0008278//cohesin complex	GO:0046983//protein dimerization activity;GO:0032559;GO:0003774//motor activity	GO:0006259//DNA metabolic process;GO:0007050//cell cycle arrest;GO:0009628//response to abiotic stimulus;GO:0000070//mitotic sister chromatid segregation;GO:0000377;GO:0033554//cellular response to stress;GO:0010948;GO:0035556//intracellular signal transduction	gi|348553156|ref|XP_003462393.1|/0/PREDICTED: LOW QUALITY PROTEIN: structural maintenance of chromosomes protein 1A-like [Cavia porcellus]
ENSRNOG00000014480	Sys1	3.06628	0.841063	-	GO:0012505//endomembrane system;GO:0031224//intrinsic to membrane;GO:0043231//intracellular membrane-bounded organelle;GO:0012505//endomembrane system;GO:0031224//intrinsic to membrane;GO:0043231//intracellular membrane-bounded organelle	-	GO:0006810//transport;GO:0006810//transport	gi|145966734|ref|NP_079851.2|/6.08779e-86/protein SYS1 homolog [Mus musculus]
ENSRNOG00000009244	Abhd4	-3.87727	0.867549	K13698|1|0.0|739|rno:364380|abhydrolase domain-containing protein 4	-	-	GO:0006629//lipid metabolic process	gi|157819991|ref|NP_001102336.1|/0/abhydrolase domain-containing protein 4 [Rattus norvegicus]
ENSRNOG00000015018	Pdia3	-3.40783	0.871404	K08056|1|0.0|930|rno:29468|protein disulfide isomerase family A, member 3 [EC:5.3.4.1]	GO:0044432//endoplasmic reticulum part;GO:0048770	GO:0016862//intramolecular oxidoreductase activity, interconverting keto- and enol-groups;GO:0015036//disulfide oxidoreductase activity	GO:0006915//apoptotic process;GO:0018904;GO:0044267//cellular protein metabolic process;GO:0019725//cellular homeostasis	gi|1352384|sp|P11598.2|PDIA3_RAT/0/RecName: Full=Protein disulfide-isomerase A3; AltName: Full=58 kDa glucose-regulated protein; AltName: Full=58 kDa microsomal protein; Short=p58; AltName: Full=Disulfide isomerase ER-60; AltName: Full=Endoplasmic reticulum resident protein 57; Short=ER protein 57; Short=ERp57; AltName: Full=Endoplasmic reticulum resident protein 60; Short=ER protein 60; Short=ER…
ENSRNOG00000047147	-	2.30765	0.842422	-	-	GO:0005198//structural molecule activity	GO:0032535//regulation of cellular component size	gi|415703079|ref|NP_001178623.1|/4.94994e-56/nebulette [Rattus norvegicus]
ENSRNOG00000000847	Csnk2b	-3.7922	0.890149	K03115|1|3e-122|428|cfa:474844|casein kinase II subunit beta	GO:0043234//protein complex;GO:0044444//cytoplasmic part;GO:0016020//membrane	GO:0004672//protein kinase activity;GO:0019207//kinase regulator activity;GO:0005515//protein binding	GO:0016055//Wnt receptor signaling pathway;GO:0007243//intracellular protein kinase cascade;GO:0019222//regulation of metabolic process;GO:0006935//chemotaxis;GO:0019221//cytokine-mediated signaling pathway;GO:0006461//protein complex assembly;GO:0016310//phosphorylation;GO:0051098//regulation of binding;GO:0008283//cell proliferation	gi|149028072|gb|EDL83523.1|/1.9999e-118/casein kinase 2, beta subunit, isoform CRA_b [Rattus norvegicus]
ENSRNOG00000050381	Dus3l	-3.59267	0.805531	K05544|1|0.0|1252|rno:301122|tRNA-dihydrouridine synthase 3 [EC:1.3.1.89]	-	GO:0046914//transition metal ion binding;GO:0016627//oxidoreductase activity, acting on the CH-CH group of donors;GO:0050662//coenzyme binding	GO:0006399//tRNA metabolic process	gi|149028168|gb|EDL83606.1|/0/dihydrouridine synthase 3-like (S. cerevisiae), isoform CRA_c [Rattus norvegicus]
ENSRNOG00000049452	NEBL	3.6538	0.845634	K06086|1|3e-10|63.9|ssc:100153151|sorbin and SH3 domain containing 1	-	GO:0046914//transition metal ion binding;GO:0005198//structural molecule activity;GO:0008092//cytoskeletal protein binding;GO:0005198//structural molecule activity	GO:0032535//regulation of cellular component size;GO:0032535//regulation of cellular component size	gi|149021153|gb|EDL78760.1|/2.85771e-160/rCG55853, isoform CRA_b [Rattus norvegicus]
ENSRNOG00000009882	PPP3CA	-3.045	0.835471	K04348|1|0.0|1011|pon:100174530|protein phosphatase 3, catalytic subunit [EC:3.1.3.16]	GO:0031981//nuclear lumen;GO:0008287//protein serine/threonine phosphatase complex;GO:0031674//I band	GO:0046983//protein dimerization activity;GO:0046872//metal ion binding;GO:0004722//protein serine/threonine phosphatase activity	GO:0014075//response to amine stimulus;GO:0006357//regulation of transcription from RNA polymerase II promoter;GO:0006605//protein targeting;GO:0048747//muscle fiber development;GO:0006796//phosphate-containing compound metabolic process;GO:0050796//regulation of insulin secretion;GO:0051899//membrane depolarization;GO:0022402//cell cycle process;GO:0070838//divalent metal ion transport;GO:000646…	gi|4584820|emb|CAA40398.2|/0/serine/threonine specific protein phosphatase [Rattus norvegicus]
ENSRNOG00000016244	Mical2	-3.18161	0.814451	K06115|1|5e-21|104|mmu:20741|spectrin beta	GO:0043232	GO:0046914//transition metal ion binding;GO:0016491//oxidoreductase activity	GO:0008152//metabolic process	gi|213385317|ref|NP_001132980.1|/0/protein-methionine sulfoxide oxidase MICAL2 [Rattus norvegicus]
ENSRNOG00000009592	Cyb5r3	-3.86389	0.892498	K00326|1|5e-168|592|rno:25035|cytochrome-b5 reductase [EC:1.6.2.2]	GO:0043234//protein complex;GO:0031966//mitochondrial membrane;GO:0019866//organelle inner membrane;GO:0019866//organelle inner membrane;GO:0031966//mitochondrial membrane	GO:0016653//oxidoreductase activity, acting on NADH or NADPH, heme protein as acceptor;GO:0050662//coenzyme binding;GO:0032559;GO:0016653//oxidoreductase activity, acting on NADH or NADPH, heme protein as acceptor;GO:0050662//coenzyme binding;GO:0032559	GO:0006766//vitamin metabolic process;GO:0003013;GO:0006694//steroid biosynthetic process;GO:0008203//cholesterol metabolic process;GO:0006694//steroid biosynthetic process;GO:0008203//cholesterol metabolic process	gi|20302049|ref|NP_620232.1|/1.0528e-158/NADH-cytochrome b5 reductase 3 [Rattus norvegicus]
ENSRNOG00000008226	Zbtb8os	3.48306	0.836798	-	-	-	-	gi|392348365|ref|XP_003750084.1|/7.75494e-78/PREDICTED: protein archease-like [Rattus norvegicus]
ENSRNOG00000050552	Snap23	3.50535	0.827141	K08508|1|1e-97|355|rno:64630|synaptosomal-associated protein, 23kDa	GO:0043234//protein complex;GO:0031981//nuclear lumen;GO:0044459//plasma membrane part;GO:0005766;GO:0012506//vesicle membrane;GO:0030141//secretory granule	GO:0000149//SNARE binding	GO:0006887//exocytosis;GO:0016044//cellular membrane organization;GO:0048193//Golgi vesicle transport;GO:0065003	gi|12083641|ref|NP_073180.1|/7.86631e-97/synaptosomal-associated protein 23 [Rattus norvegicus]
ENSRNOG00000019552	Lsm7	2.03536	0.807848	K12626|1|2e-44|177|rno:362829|U6 snRNA-associated Sm-like protein LSm7	GO:0043231//intracellular membrane-bounded organelle;GO:0032991//macromolecular complex	GO:0017069//snRNA binding;GO:0046983//protein dimerization activity	GO:0006401//RNA catabolic process;GO:0000377	gi|119589795|gb|EAW69389.1|/5.22192e-46/LSM7 homolog, U6 small nuclear RNA associated (S. cerevisiae), isoform CRA_a [Homo sapiens]
ENSRNOG00000034107	1110038F14Rik	3.10854	0.816431	K01868|1|3e-06|52.4|nvi:100119396|threonyl-tRNA synthetase [EC:6.1.1.3]	-	-	-	gi|392341536|ref|XP_003754361.1|/1.84435e-102/PREDICTED: UPF0488 protein C8orf33 homolog [Rattus norvegicus]
ENSRNOG00000017829	Ssu72	-3.48067	0.870182	K15544|1|6e-109|394|rno:298681|RNA polymerase II subunit A C-terminal domain phosphatase SSU72 [EC:3.1.3.16]	GO:0043231//intracellular membrane-bounded organelle	GO:0016791//phosphatase activity	GO:0006796//phosphate-containing compound metabolic process;GO:0006396//RNA processing	gi|71043762|ref|NP_001020828.1|/4.93295e-108/RNA polymerase II subunit A C-terminal domain phosphatase SSU72 [Rattus norvegicus]
ENSRNOG00000015654	Ghr	-3.69619	0.850826	K05080|1|0.0|1306|rno:25235|growth hormone receptor	GO:0043231//intracellular membrane-bounded organelle;GO:0044297//cell body;GO:0016021//integral to membrane;GO:0043235//receptor complex;GO:0044421//extracellular region part;GO:0043231//intracellular membrane-bounded organelle;GO:0044297//cell body;GO:0016021//integral to membrane;GO:0043235//receptor complex;GO:0044421//extracellular region part	GO:0004896//cytokine receptor activity;GO:0019904//protein domain specific binding;GO:0042802//identical protein binding;GO:0019902//phosphatase binding;GO:0042277//peptide binding;GO:0019900//kinase binding;GO:0004896//cytokine receptor activity;GO:0019904//protein domain specific binding;GO:0042802//identical protein binding;GO:0019902//phosphatase binding;GO:0042277//peptide binding;GO:0019900…	GO:0042506//tyrosine phosphorylation of Stat5 protein;GO:0001934//positive regulation of protein phosphorylation;GO:0009081//branched-chain amino acid metabolic process;GO:0043648//dicarboxylic acid metabolic process;GO:0032868//response to insulin stimulus;GO:0006898//receptor-mediated endocytosis;GO:0072350;GO:0042976//activation of Janus kinase activity;GO:0051216//cartilage development;GO:004…	gi|8393434|ref|NP_058790.1|/0/growth hormone receptor precursor [Rattus norvegicus]
ENSRNOG00000018708	Ppp1ca	-3.18259	0.86756	K06269|1|0.0|680|ssc:733611|protein phosphatase 1, catalytic subunit [EC:3.1.3.16]	GO:0008287//protein serine/threonine phosphatase complex;GO:0030425//dendrite;GO:0035097//histone methyltransferase complex;GO:0043025//neuronal cell body;GO:0044444//cytoplasmic part	GO:0004721//phosphoprotein phosphatase activity;GO:0043169//cation binding;GO:0019888//protein phosphatase regulator activity	GO:0005980//glycogen catabolic process;GO:0006412//translation;GO:0001763//morphogenesis of a branching structure;GO:0005978//glycogen biosynthetic process;GO:0007126//meiosis;GO:0030323//respiratory tube development;GO:0006464//cellular protein modification process;GO:0019222//regulation of metabolic process;GO:0006641//triglyceride metabolic process	gi|4506003|ref|NP_002699.1|/0/serine/threonine-protein phosphatase PP1-alpha catalytic subunit isoform 1 [Homo sapiens]
ENSRNOG00000047708	Gstz1	-2.91299	0.833902	K01800|1|3e-119|429|rno:681913|maleylacetoacetate isomerase [EC:5.2.1.2]	GO:0043231//intracellular membrane-bounded organelle;GO:0044444//cytoplasmic part	GO:0042802//identical protein binding;GO:0016859//cis-trans isomerase activity;GO:0004601//peroxidase activity;GO:0016765//transferase activity, transferring alkyl or aryl (other than methyl) groups	GO:0006790//sulfur compound metabolic process;GO:0006558//L-phenylalanine metabolic process;GO:0006570//tyrosine metabolic process	gi|354475007|ref|XP_003499721.1|/2.42432e-119/PREDICTED: maleylacetoacetate isomerase-like [Cricetulus griseus]
ENSRNOG00000007752	Zmynd19	3.48865	0.810028	K02870|1|3e-20|100|tgu:100223396|large subunit ribosomal protein L12e	GO:0016020//membrane;GO:0043231//intracellular membrane-bounded organelle	GO:0046914//transition metal ion binding	-	gi|13385526|ref|NP_080297.1|/7.47818e-122/zinc finger MYND domain-containing protein 19 [Mus musculus]
ENSRNOG00000016565	-	3.37651	0.800939	K09230|1|3e-25|113|mmu:232878|SCAN domain-containing zinc finger protein	GO:0043231//intracellular membrane-bounded organelle	GO:0046914//transition metal ion binding;GO:0003676//nucleic acid binding	GO:0006351//transcription, DNA-dependent	gi|157821057|ref|NP_001102375.1|/8.12031e-75/zinc finger protein 524 [Rattus norvegicus]
ENSRNOG00000031032	Hmgn3	3.10031	0.813135	K11301|1|6e-41|168|cfa:611307|high-mobility group nucleosome-binding domain-containing protein 3	GO:0031981//nuclear lumen;GO:0031981//nuclear lumen	GO:0005488//binding;GO:0005515//protein binding	GO:0006357//regulation of transcription from RNA polymerase II promoter;GO:0050796//regulation of insulin secretion;GO:0043388//positive regulation of DNA binding;GO:0006357//regulation of transcription from RNA polymerase II promoter;GO:0050796//regulation of insulin secretion;GO:0043388//positive regulation of DNA binding	gi|291396516|ref|XP_002714489.1|/4.11364e-37/PREDICTED: high mobility group nucleosomal binding domain 3 [Oryctolagus cuniculus]
ENSRNOG00000050473	Rps27l	-3.6624	0.879755	K02978|1|5e-38|155|ssc:100738416|small subunit ribosomal protein S27e	GO:0043231//intracellular membrane-bounded organelle;GO:0030529//ribonucleoprotein complex	GO:0090079;GO:0005198//structural molecule activity;GO:0016505//apoptotic protease activator activity;GO:0043169//cation binding	GO:0006412//translation;GO:0008630//intrinsic apoptotic signaling pathway in response to DNA damage response;GO:0006259//DNA metabolic process;GO:0051345//positive regulation of hydrolase activity;GO:0000077//DNA damage checkpoint	gi|392337774|ref|XP_003753352.1|/8.37507e-40/PREDICTED: 40S ribosomal protein S27-like [Rattus norvegicus]
ENSRNOG00000000996	Arpc1a	2.15652	0.812271	K05757|1|3e-121|434|pon:100461245|actin related protein 2/3 complex, subunit 1A/1B	GO:0015629//actin cytoskeleton;GO:0015629//actin cytoskeleton	GO:0008092//cytoskeletal protein binding;GO:0008092//cytoskeletal protein binding	GO:0008064//regulation of actin polymerization or depolymerization;GO:0008064//regulation of actin polymerization or depolymerization	gi|395738155|ref|XP_002817765.2|/2.13509e-120/PREDICTED: actin-related protein 2/3 complex subunit 1A [Pongo abelii]
ENSRNOG00000013331	Sdha	-3.56867	0.888864	K00234|1|0.0|1263|rno:157074|succinate dehydrogenase (ubiquinone) flavoprotein subunit [EC:1.3.5.1]	GO:0005746//mitochondrial respiratory chain	GO:0050662//coenzyme binding;GO:0000104//succinate dehydrogenase activity	GO:0048731;GO:0022900//electron transport chain;GO:0043648//dicarboxylic acid metabolic process;GO:0009060//aerobic respiration;GO:0051234//establishment of localization	gi|18426858|ref|NP_569112.1|/0/succinate dehydrogenase [ubiquinone] flavoprotein subunit, mitochondrial precursor [Rattus norvegicus]
ENSRNOG00000010420	Shfm1	-3.04954	0.860599	K10881|1|7e-17|87.8|acs:100552789|26 proteasome complex subunit DSS1	GO:0016591//DNA-directed RNA polymerase II, holoenzyme	GO:0005488//binding;GO:0016787//hydrolase activity	GO:0019538//protein metabolic process	gi|403306658|ref|XP_003943840.1|/5.71598e-16/PREDICTED: 26S proteasome complex subunit DSS1-like [Saimiri boliviensis boliviensis]
ENSRNOG00000005795	Aasdhppt	-3.49402	0.85368	K06133|1|5e-175|613|rno:300328|4'-phosphopantetheinyl transferase [EC:2.7.8.-]	GO:0044444//cytoplasmic part	GO:0046872//metal ion binding;GO:0016780//phosphotransferase activity, for other substituted phosphate groups	GO:0006766//vitamin metabolic process;GO:0009058//biosynthetic process;GO:0006575//cellular modified amino acid metabolic process	gi|256985146|ref|NP_001100268.2|/4.09202e-174/L-aminoadipate-semialdehyde dehydrogenase-phosphopantetheinyl transferase [Rattus norvegicus]
ENSRNOG00000000815	Smpdl3a	-3.18732	0.811839	K01128|1|0.0|925|rno:294422|[EC:3.1.4.-]	GO:0044421//extracellular region part	GO:0005488//binding;GO:0004620//phospholipase activity	GO:0006684//sphingomyelin metabolic process	gi|53850608|ref|NP_001005539.1|/0/acid sphingomyelinase-like phosphodiesterase 3a precursor [Rattus norvegicus]
ENSRNOG00000004505	Nfic	-3.6879	0.868687	K09170|1|0.0|796|rno:29228|nuclear factor I/C	GO:0043231//intracellular membrane-bounded organelle	GO:0001071//nucleic acid binding transcription factor activity;GO:0043565//sequence-specific DNA binding;GO:0043566//structure-specific DNA binding	GO:0042476//odontogenesis;GO:0006259//DNA metabolic process;GO:0000122//negative regulation of transcription from RNA polymerase II promoter	gi|148228879|ref|NP_113755.1|/0/nuclear factor 1 C-type [Rattus norvegicus]
ENSRNOG00000014275	HOOK3	3.98533	0.802203	K08408|1|3e-19|98.2|cfa:480418|G protein-coupled receptor 68;K04514|4|2e-17|91.7|tgu:100221127|Rho-associated, coiled-coil containing protein kinase [EC:2.7.11.1]	GO:0043234//protein complex;GO:0005813//centrosome;GO:0005774//vacuolar membrane;GO:0044431//Golgi apparatus part;GO:0043234//protein complex;GO:0005813//centrosome;GO:0005774//vacuolar membrane;GO:0044431//Golgi apparatus part	GO:0015631//tubulin binding;GO:0015631//tubulin binding	GO:0021846//cell proliferation in forebrain;GO:0007041//lysosomal transport;GO:0051640//organelle localization;GO:0033365//protein localization to organelle;GO:0000226//microtubule cytoskeleton organization;GO:0007033//vacuole organization;GO:0016197//endosomal transport;GO:0010721//negative regulation of cell development;GO:0021846//cell proliferation in forebrain;GO:0007041//lysosomal transport…	gi|209869999|ref|NP_001129570.1|/0/protein Hook homolog 3 [Rattus norvegicus]
ENSRNOG00000016833	Ide	-3.11448	0.80789	K01408|1|0.0|2040|rno:25700|insulysin [EC:3.4.24.56]	GO:0000502//proteasome complex;GO:0044439;GO:0044421//extracellular region part	GO:0004175//endopeptidase activity;GO:0046914//transition metal ion binding;GO:0017046//peptide hormone binding;GO:0017111//nucleoside-triphosphatase activity;GO:0060089;GO:0042165//neurotransmitter binding;GO:0042802//identical protein binding;GO:0032559	GO:0043171//peptide catabolic process;GO:0030162//regulation of proteolysis;GO:0003006//developmental process involved in reproduction;GO:0009100//glycoprotein metabolic process;GO:0023052//signaling;GO:0009207;GO:0030163//protein catabolic process;GO:0051704;GO:0051260//protein homooligomerization	gi|6981076|ref|NP_037291.1|/0/insulin-degrading enzyme [Rattus norvegicus]
ENSRNOG00000003873	Cpd	-3.32356	0.849404	K07752|1|0.0|2568|rno:25306|carboxypeptidase D [EC:3.4.17.22]	GO:0044431//Golgi apparatus part;GO:0031224//intrinsic to membrane	GO:0008235//metalloexopeptidase activity;GO:0046914//transition metal ion binding;GO:0004180//carboxypeptidase activity	GO:0070669//response to interleukin-2;GO:0019538//protein metabolic process	gi|6978699|ref|NP_036968.1|/0/carboxypeptidase D precursor [Rattus norvegicus]
ENSRNOG00000010149	Cmc1	3.68031	0.836798	-	GO:0043231//intracellular membrane-bounded organelle	GO:0043169//cation binding	-	gi|148677309|gb|EDL09256.1|/7.23955e-62/RIKEN cDNA 2010110K16, isoform CRA_c [Mus musculus]
ENSRNOG00000005333	Azin1	-3.35812	0.837725	K01581|1|3e-122|441|xla:379859|ornithine decarboxylase [EC:4.1.1.17]	GO:0044444//cytoplasmic part	GO:0008047//enzyme activator activity;GO:0005488//binding;GO:0004857//enzyme inhibitor activity	GO:0019222//regulation of metabolic process;GO:0006595//polyamine metabolic process;GO:0006520//cellular amino acid metabolic process	gi|38494225|gb|AAH61550.1|/0/Antizyme inhibitor 1 [Rattus norvegicus]
ENSRNOG00000014765	Vapa	-3.66244	0.880766	K06096|1|3e-130|466|rno:58857|vesicle-associated membrane protein-associated protein A	GO:0043296//apical junction complex;GO:0031224//intrinsic to membrane;GO:0043231//intracellular membrane-bounded organelle;GO:0015630//microtubule cytoskeleton;GO:0044444//cytoplasmic part;GO:0031090//organelle membrane	GO:0060089;GO:0046983//protein dimerization activity	GO:0006643//membrane lipid metabolic process;GO:0016044//cellular membrane organization;GO:0007249//I-kappaB kinase/NF-kappaB cascade	gi|118142811|ref|NP_113819.3|/2.44815e-129/vesicle-associated membrane protein-associated protein A [Rattus norvegicus]
ENSRNOG00000017780	Akr7a2	-3.38066	0.846381	K15303|1|0.0|652|rno:171445|aflatoxin B1 aldehyde reductase	GO:0044431//Golgi apparatus part	GO:0004033//aldo-keto reductase (NADP) activity	GO:0044238//primary metabolic process;GO:0044237//cellular metabolic process	gi|39930812|sp|Q8CG45.2|ARK72_RAT/0/RecName: Full=Aflatoxin B1 aldehyde reductase member 2; Short=rAFAR2; AltName: Full=Succinic semialdehyde reductase; Short=SSA reductase
ENSRNOG00000017404	Pcmtd2	-2.94466	0.818358	K00573|1|3e-15|85.5|smm:Smp_058140.3|protein-L-isoaspartate(D-aspartate) O-methyltransferase [EC:2.1.1.77]	GO:0044424//intracellular part	GO:0008757//S-adenosylmethionine-dependent methyltransferase activity	GO:0006730//one-carbon metabolic process;GO:0008213	gi|348041203|ref|NP_001101280.2|/5.98422e-180/protein-L-isoaspartate O-methyltransferase domain-containing protein 2 [Rattus norvegicus]
ENSRNOG00000038951	Cox17	-3.08519	0.871014	K02260|1|2e-19|94.7|ptr:100609675|cytochrome c oxidase assembly protein subunit 17	GO:0005740//mitochondrial envelope	GO:0005507//copper ion binding;GO:0030234//enzyme regulator activity	GO:0007417//central nervous system development;GO:0044237//cellular metabolic process;GO:0048513//organ development;GO:0000041//transition metal ion transport	gi|74138622|dbj|BAE27132.1|/1.37245e-18/unnamed protein product [Mus musculus]
ENSRNOG00000014013	Map4k4	-3.7712	0.824856	K04407|1|0.0|1253|rno:301363|mitogen-activated protein kinase kinase kinase kinase 4 [EC:2.7.11.1]	-	GO:0004672//protein kinase activity;GO:0030695//GTPase regulator activity;GO:0032559	GO:0019222//regulation of metabolic process;GO:0006464//cellular protein modification process;GO:0006796//phosphate-containing compound metabolic process;GO:0043408//regulation of MAPK cascade	gi|157819181|ref|NP_001100374.1|/0/mitogen-activated protein kinase kinase kinase kinase 4 [Rattus norvegicus]
ENSRNOG00000049235	Arl16	3.62666	0.803446	K07942|1|2e-16|85.1|isc:IscW_ISCW000919|ADP-ribosylation factor-like 1	-	GO:0032561//guanyl ribonucleotide binding	-	gi|149055023|gb|EDM06840.1|/3.8363e-94/rCG33173, isoform CRA_b [Rattus norvegicus]
ENSRNOG00000001442	Por	-3.5536	0.857334	K00327|1|0.0|1343|rno:29441|NADPH-ferrihemoprotein reductase [EC:1.6.2.4]	GO:0043231//intracellular membrane-bounded organelle;GO:0031090//organelle membrane	GO:0046914//transition metal ion binding;GO:0005515//protein binding;GO:0000166//nucleotide binding;GO:0016675;GO:0050662//coenzyme binding;GO:0016653//oxidoreductase activity, acting on NADH or NADPH, heme protein as acceptor	GO:0010893//positive regulation of steroid biosynthetic process;GO:0002062//chondrocyte differentiation;GO:0032768;GO:0008203//cholesterol metabolic process;GO:0009698//phenylpropanoid metabolic process;GO:0006475//internal protein amino acid acetylation;GO:0006730//one-carbon metabolic process;GO:0006631//fatty acid metabolic process;GO:0006520//cellular amino acid metabolic process;GO:0006915//…	gi|13928780|ref|NP_113764.1|/0/NADPH--cytochrome P450 reductase [Rattus norvegicus]
ENSRNOG00000050315	Dcxr	-3.50107	0.834186	K03331|1|3e-123|441|rno:171408|L-xylulose reductase [EC:1.1.1.10];K00081|4|2e-106|385|bta:782391|carbonyl reductase 2 [EC:1.1.1.184]	GO:0030141//secretory granule;GO:0016020//membrane;GO:0042995//cell projection	GO:0005488//binding;GO:0016616//oxidoreductase activity, acting on the CH-OH group of donors, NAD or NADP as acceptor	GO:0019321//pentose metabolic process;GO:0046496//nicotinamide nucleotide metabolic process;GO:0019318//hexose metabolic process	gi|19705501|ref|NP_599214.1|/2.52395e-122/L-xylulose reductase [Rattus norvegicus]
ENSRNOG00000019426	Fam103a1	3.66538	0.848319	-	-	-	-	gi|188536087|ref|NP_001120923.1|/2.27261e-58/uncharacterized protein LOC293058 [Rattus norvegicus]
ENSRNOG00000015059	Mcfd2	2.9576	0.819358	-	GO:0030134//ER to Golgi transport vesicle	GO:0046872//metal ion binding	GO:0006810//transport;GO:0043436;GO:0006487//protein N-linked glycosylation	gi|149050471|gb|EDM02644.1|/4.22696e-82/multiple coagulation factor deficiency 2, isoform CRA_a [Rattus norvegicus]
ENSRNOG00000021314	Fdft1	-3.55888	0.867549	K00801|1|0.0|845|rno:29580|farnesyl-diphosphate farnesyltransferase [EC:2.5.1.21]	GO:0031090//organelle membrane;GO:0043231//intracellular membrane-bounded organelle;GO:0031224//intrinsic to membrane	GO:0005488//binding;GO:0004311//farnesyltranstransferase activity	GO:0006694//steroid biosynthetic process;GO:0006720//isoprenoid metabolic process;GO:0006644//phospholipid metabolic process;GO:0008203//cholesterol metabolic process	gi|9506591|ref|NP_062111.1|/0/squalene synthase [Rattus norvegicus]
ENSRNOG00000011592	Lrp10	-3.62213	0.836598	K06233|1|2e-16|89.0|cel:F29D11.1|low density lipoprotein-related protein 2	GO:0012505//endomembrane system;GO:0031224//intrinsic to membrane	GO:0004871//signal transducer activity;GO:0030169//low-density lipoprotein particle binding	GO:0010876;GO:0016192//vesicle-mediated transport;GO:0044238//primary metabolic process;GO:0023052//signaling	gi|83649705|ref|NP_001032866.1|/0/low-density lipoprotein receptor-related protein 10 precursor [Rattus norvegicus]
ENSRNOG00000039567	Trmt10c	-3.63111	0.829131	K15445|1|8e-20|100|api:100160361|tRNA (guanine9-N1)-methyltransferase [EC:2.1.1.221]	GO:0043231//intracellular membrane-bounded organelle	GO:0016741	GO:0006399//tRNA metabolic process;GO:0006730//one-carbon metabolic process	gi|56605752|ref|NP_001008338.1|/0/mitochondrial ribonuclease P protein 1 precursor [Rattus norvegicus]
ENSRNOG00000012640	Dpp7	-3.50632	0.824687	K01276|1|0.0|969|rno:83799|dipeptidyl-peptidase II [EC:3.4.14.2]	GO:0000323//lytic vacuole;GO:0031410//cytoplasmic vesicle	GO:0005488//binding;GO:0008238//exopeptidase activity	GO:0019538//protein metabolic process	gi|14010871|ref|NP_114179.1|/0/dipeptidyl peptidase 2 precursor [Rattus norvegicus]
ENSRNOG00000009754	Nampt	-3.33248	0.87311	K03462|1|0.0|978|rno:297508|nicotinamide phosphoribosyltransferase [EC:2.4.2.12]	GO:0043231//intracellular membrane-bounded organelle;GO:0044444//cytoplasmic part	GO:0016763//transferase activity, transferring pentosyl groups;GO:0042802//identical protein binding;GO:0005102//receptor binding	GO:0009888//tissue development;GO:0007169//transmembrane receptor protein tyrosine kinase signaling pathway;GO:0019359;GO:0008284//positive regulation of cell proliferation;GO:0007154//cell communication;GO:0022414//reproductive process;GO:0010557//positive regulation of macromolecule biosynthetic process;GO:0010033//response to organic substance;GO:0009820//alkaloid metabolic process	gi|148704942|gb|EDL36889.1|/0/pre-B-cell colony-enhancing factor 1 [Mus musculus]
ENSRNOG00000023764	Kctd2	2.92514	0.800265	-	GO:0005887//integral to plasma membrane	GO:0005267//potassium channel activity	GO:0030001//metal ion transport	gi|50401040|sp|Q8CEZ0.1|KCTD2_MOUSE/8.32521e-72/RecName: Full=BTB/POZ domain-containing protein KCTD2
ENSRNOG00000008630	Psma7	-3.60017	0.88223	K02731|1|4e-120|431|rno:29674|20S proteasome subunit alpha 4 [EC:3.4.25.1]	GO:0043231//intracellular membrane-bounded organelle;GO:0005839//proteasome core complex	GO:0004175//endopeptidase activity;GO:0005515//protein binding	GO:0043161//proteasomal ubiquitin-dependent protein catabolic process;GO:0051320//S phase;GO:0007050//cell cycle arrest;GO:0016070//RNA metabolic process;GO:0051439//regulation of ubiquitin-protein ligase activity involved in mitotic cell cycle;GO:0006520//cellular amino acid metabolic process;GO:0006915//apoptotic process;GO:0030330//DNA damage response, signal transduction by p53 class mediator…	gi|1346784|sp|P48004.1|PSA7_RAT/3.50229e-123/RecName: Full=Proteasome subunit alpha type-7; AltName: Full=Proteasome subunit RC6-1
ENSRNOG00000028625	Eif4ebp3	3.20616	0.802172	K07205|1|3e-16|85.5|acs:100553993|eukaryotic translation initiation factor 4E binding protein 1	GO:0043234//protein complex	GO:0045182//translation regulator activity;GO:0031369//translation initiation factor binding	GO:0006446//regulation of translational initiation	gi|322309728|ref|NP_001189481.1|/7.41123e-31/eukaryotic translation initiation factor 4E-binding protein 3 [Rattus norvegicus]
