# Supplementary material for: Genome-Wide Expression Profiling of Anoxia/Reoxygenation in Rat Cardiomyocytes Uncovers the Role of MitoKATP in Energy Homeostasis
Source: Oxid Med Cell Longev. 2015 Jun 15;2015:756576. doi: 10.1155/2015/756576 (PMC4485557; doi:10.1155/2015/756576)
Supplement: Supplementary file 1 — Excel 1: Raw data of the expression of all the gene (4 groups × 3 replicates of the sequencing) . Excel 2: Significant differently expressed genes from Control versus A/R. Excel 3: Significant differently expressed genes from A/R versus DZ. Excel 4: Significant differently expressed genes from DZ versus DZ5HD. Supplementary Figure 1: Assessment of the DGE saturation degree. Supplementary Table 1: The raw data of DGE profile of 12 sequencings. Supplementary Table 2: DEGs significantly enriched GO terms from Control vs A/R (P<0.05). Supplementary Table 3: DEGs significantly enriched GO terms from A/R vs DZ (P<0.05). Supplementary Table 4: DEGs significantly enriched GO terms from DZ vs DZ5HD (P<0.05). Supplementary Table 5: Significantly enriched pathways for DEGs from Con vs A/R (P<0.01). Supplementary Table 6: Significantly enriched pathways for DEGs from A/R vs DZ (P<0.01). Supplementary Table 7: Significantly enriched pathways for DEGs from DZ vs DZ5HD (P<0.01). [file 756576.f1.zip › Excel3í¬í¬significant DEGs (ú_ú»R-VS-DZ).xlsx]

## Sheet: Excel3——significant DEGs (Ａ／R-V
GeneID	GeneName	log2Ratio(DZ/A/R)	Qvalue	KEGG Orthology	GO Component	GO Function	GO Process	Blast nr
ENSRNOG00000001214	Pfkl	-2.9163	0.828937	K00850|1|0.0|1528|rno:25741|6-phosphofructokinase [EC:2.7.1.11]	GO:0043234//protein complex;GO:0044444//cytoplasmic part	GO:0043169//cation binding;GO:0070061//fructose binding;GO:0008443//phosphofructokinase activity;GO:0019899//enzyme binding;GO:0019203//carbohydrate phosphatase activity;GO:0032559	GO:0006007//glucose catabolic process;GO:0050796//regulation of insulin secretion;GO:0009746;GO:0051260//protein homooligomerization;GO:0016310//phosphorylation;GO:0006000//fructose metabolic process	gi|6981352|ref|NP_037322.1|/0/6-phosphofructokinase, liver type [Rattus norvegicus]
ENSRNOG00000007673	Ppig	-2.05538	0.831156	K09566|1|7e-166|585|rno:83624|peptidyl-prolyl isomerase G (cyclophilin G) [EC:5.2.1.8]	GO:0034399//nuclear periphery	GO:0016859//cis-trans isomerase activity	GO:0008152//metabolic process	gi|13929124|ref|NP_113981.1|/6.065e-165/peptidyl-prolyl cis-trans isomerase G [Rattus norvegicus]
ENSRNOG00000008163	Atp6v1g1	-2.56413	0.866088	K02152|1|6e-44|178|rno:298103|V-type H+-transporting ATPase subunit G [EC:3.6.3.14]	GO:0005774//vacuolar membrane;GO:0005764//lysosome;GO:0030136//clathrin-coated vesicle	GO:0019899//enzyme binding;GO:0015662//ATPase activity, coupled to transmembrane movement of ions, phosphorylative mechanism	GO:0006818//hydrogen transport;GO:0015031//protein transport;GO:0007169//transmembrane receptor protein tyrosine kinase signaling pathway;GO:0008152//metabolic process;GO:0006875//cellular metal ion homeostasis	gi|157820847|ref|NP_001100130.1|/4.47922e-43/V-type proton ATPase subunit G 1 [Rattus norvegicus]
ENSRNOG00000012576	Vimp	3.58785	0.874303	K14025|1|3e-73|276|rno:286900|selenoprotein S	GO:0034385;GO:0031227//intrinsic to endoplasmic reticulum membrane	GO:0005515//protein binding	GO:0031348//negative regulation of defense response;GO:0032496//response to lipopolysaccharide;GO:0006984//ER-nucleus signaling pathway;GO:0043161//proteasomal ubiquitin-dependent protein catabolic process;GO:0001818//negative regulation of cytokine production;GO:0010558;GO:0006886//intracellular protein transport;GO:0019725//cellular homeostasis;GO:0002438//acute inflammatory response to antigen…	gi|111119003|ref|NP_775143.2|/2.30074e-72/selenoprotein S [Rattus norvegicus]
ENSRNOG00000005733	Cpsf2	3.66064	0.824866	K14402|1|0.0|1436|rno:299256|cleavage and polyadenylation specificity factor subunit 2	GO:0005849//mRNA cleavage factor complex	GO:0003676//nucleic acid binding;GO:0003824//catalytic activity	GO:0000377;GO:0006405//RNA export from nucleus;GO:0008334//histone mRNA metabolic process;GO:0006397//mRNA processing;GO:0006353//DNA-dependent transcription, termination	gi|157822735|ref|NP_001100223.1|/0/cleavage and polyadenylation specificity factor subunit 2 [Rattus norvegicus]
ENSRNOG00000028302	Smarcb1	-2.18464	0.834269	K11648|1|0.0|735|xla:100505439|SWI/SNF-related matrix-associated actin-dependent regulator of chromatin subfamily B member 1	GO:0070603;GO:0001739//sex chromatin	GO:0005515//protein binding	GO:0048731;GO:0019079//viral genome replication;GO:0008283//cell proliferation;GO:0001824//blastocyst development;GO:0006259//DNA metabolic process;GO:0048869//cellular developmental process;GO:0051704;GO:0043388//positive regulation of DNA binding;GO:0016568//chromatin modification	gi|55956801|ref|NP_001007469.1|/0/SWI/SNF-related matrix-associated actin-dependent regulator of chromatin subfamily B member 1 isoform b [Homo sapiens]
ENSRNOG00000043192	Ptpla	3.3646	0.872883	K10703|1|8e-114|409|rno:680115|3-hydroxy acyl-CoA dehydratase [EC:4.2.1.-]	GO:0031224//intrinsic to membrane;GO:0043231//intracellular membrane-bounded organelle;GO:0031090//organelle membrane	GO:0004721//phosphoprotein phosphatase activity	GO:0006631//fatty acid metabolic process;GO:0023052//signaling;GO:0032501//multicellular organismal process;GO:0006464//cellular protein modification process	gi|354482481|ref|XP_003503426.1|/8.13102e-115/PREDICTED: 3-hydroxyacyl-CoA dehydratase 1-like, partial [Cricetulus griseus]
ENSRNOG00000017254	Nsun2	-2.13026	0.815894	K15335|1|0.0|1561|rno:361191|tRNA (cytosine34-C5)-methyltransferase [EC:2.1.1.203]	GO:0031981//nuclear lumen	GO:0016427//tRNA (cytosine) methyltransferase activity;GO:0003723//RNA binding	GO:0006399//tRNA metabolic process;GO:0001510//RNA methylation	gi|157822221|ref|NP_001101873.1|/0/tRNA (cytosine-5-)-methyltransferase NSUN2 [Rattus norvegicus]
ENSRNOG00000002615	Pmm2	3.70237	0.87201	K01840|1|1e-140|500|rno:302915|phosphomannomutase [EC:5.4.2.8]	GO:0044444//cytoplasmic part;GO:0044297//cell body	GO:0016868//intramolecular transferase activity, phosphotransferases	GO:0009226//nucleotide-sugar biosynthetic process;GO:0006013//mannose metabolic process;GO:0006487//protein N-linked glycosylation	gi|157820469|ref|NP_001100443.1|/1.06972e-139/phosphomannomutase 2 [Rattus norvegicus]
ENSRNOG00000030862	Atp6v1h	-2.60429	0.830483	K02144|1|0.0|877|rno:297797|V-type H+-transporting ATPase 54 kD subunit [EC:3.6.3.14]	GO:0016471//vacuolar proton-transporting V-type ATPase complex	GO:0019829//cation-transporting ATPase activity;GO:0005488//binding	GO:0015988//energy coupled proton transmembrane transport, against electrochemical gradient;GO:0015031//protein transport;GO:0009207;GO:0007169//transmembrane receptor protein tyrosine kinase signaling pathway;GO:0016192//vesicle-mediated transport;GO:0050688//regulation of defense response to virus;GO:0051452//intracellular pH reduction;GO:0019222//regulation of metabolic process;GO:0006875//cel…	gi|62078587|ref|NP_001013951.1|/0/V-type proton ATPase subunit H [Rattus norvegicus]
ENSRNOG00000021567	Ppp1r3a	-2.07898	0.80933	K07189|1|0.0|2081|rno:500036|protein phosphatase 1, regulatory (inhibitor) subunit 3	GO:0044464//cell part	GO:0004721//phosphoprotein phosphatase activity	GO:0006073//cellular glucan metabolic process	gi|157822901|ref|NP_001102692.1|/0/protein phosphatase 1 regulatory subunit 3A [Rattus norvegicus]
ENSRNOG00000012799	Prkaa1	3.42491	0.843799	K07198|1|0.0|1029|mmu:105787|5'-AMP-activated protein kinase, catalytic alpha subunit [EC:2.7.11.11]	GO:0044444//cytoplasmic part	GO:0004690//cyclic nucleotide-dependent protein kinase activity;GO:0032559;GO:0043169//cation binding	GO:0010893//positive regulation of steroid biosynthetic process;GO:0046317;GO:0007169//transmembrane receptor protein tyrosine kinase signaling pathway;GO:0022402//cell cycle process;GO:0019318//hexose metabolic process;GO:0006464//cellular protein modification process;GO:0006950//response to stress;GO:0019217//regulation of fatty acid metabolic process;GO:0000165//MAPK cascade	gi|254763245|sp|P54645.2|AAPK1_RAT/0/RecName: Full=5'-AMP-activated protein kinase catalytic subunit alpha-1; Short=AMPK subunit alpha-1; AltName: Full=Acetyl-CoA carboxylase kinase; Short=ACACA kinase; AltName: Full=Hydroxymethylglutaryl-CoA reductase kinase; Short=HMGCR kinase; AltName: Full=Tau-protein kinase PRKAA1
ENSRNOG00000014287	Stk11	-2.4823	0.845419	K07298|1|0.0|784|rno:314621|serine/threonine-protein kinase 11 [EC:2.7.11.9]	GO:0032991//macromolecular complex;GO:0043231//intracellular membrane-bounded organelle	GO:0004672//protein kinase activity;GO:0046872//metal ion binding;GO:0019904//protein domain specific binding;GO:0032559	GO:0006094//gluconeogenesis;GO:0051640//organelle localization;GO:0007179//transforming growth factor beta receptor signaling pathway;GO:0016055//Wnt receptor signaling pathway;GO:0010033//response to organic substance;GO:0031346//positive regulation of cell projection organization;GO:0006796//phosphate-containing compound metabolic process;GO:0010627//regulation of intracellular protein kinase c…	gi|347662427|sp|D4AE59.1|STK11_RAT/0/RecName: Full=Serine/threonine-protein kinase STK11; AltName: Full=Liver kinase B1 homolog; Short=LKB1
ENSRNOG00000005703	Arfgef1	3.35998	0.825171	K12495|1|2e-37|159|bta:521541|IQ motif and SEC7 domain-containing protein	GO:0044424//intracellular part	GO:0005083//small GTPase regulator activity;GO:0008092//cytoskeletal protein binding	GO:0019222//regulation of metabolic process;GO:0016192//vesicle-mediated transport;GO:0032011//ARF protein signal transduction	gi|456367248|ref|NP_001263985.1|/0/brefeldin A-inhibited guanine nucleotide-exchange protein 1 [Rattus norvegicus]
ENSRNOG00000001889	Comt	-2.10625	0.813537	K00545|1|2e-131|469|rno:24267|catechol O-methyltransferase [EC:2.1.1.6]	GO:0043231//intracellular membrane-bounded organelle;GO:0031224//intrinsic to membrane;GO:0044444//cytoplasmic part	GO:0008171//O-methyltransferase activity;GO:0046872//metal ion binding	GO:0008202//steroid metabolic process;GO:0006575//cellular modified amino acid metabolic process;GO:0007611//learning or memory;GO:0033555//multicellular organismal response to stress;GO:0042053//regulation of dopamine metabolic process;GO:0006730//one-carbon metabolic process;GO:0008285//negative regulation of cell proliferation;GO:0042133//neurotransmitter metabolic process;GO:0031337;GO:000223…	gi|6978681|ref|NP_036663.1|/1.9091e-130/catechol O-methyltransferase [Rattus norvegicus]
ENSRNOG00000010362	Anxa2	3.90021	0.903397	-	GO:0032991//macromolecular complex;GO:0032432//actin filament bundle;GO:0048770;GO:0005578//proteinaceous extracellular matrix;GO:0005768//endosome;GO:0019898//extrinsic to membrane;GO:0044459//plasma membrane part	GO:0035091//phosphatidylinositol binding;GO:0005083//small GTPase regulator activity;GO:0055102//lipase inhibitor activity;GO:0003779//actin binding;GO:0046872//metal ion binding	GO:0030198//extracellular matrix organization;GO:0030195//negative regulation of blood coagulation;GO:0006906//vesicle fusion;GO:0001101//response to acid;GO:0044093;GO:0019222//regulation of metabolic process;GO:0048646//anatomical structure formation involved in morphogenesis;GO:0046903//secretion	gi|9247200|gb|AAB31933.2|/0/annexin II [Rattus sp.]
ENSRNOG00000017876	Dnajc21	-2.13431	0.843642	K09506|1|2e-155|549|mmu:78244|DnaJ homolog subfamily A member 5	GO:0030529//ribonucleoprotein complex	GO:0046872//metal ion binding;GO:0005515//protein binding	GO:0044267//cellular protein metabolic process	gi|149027325|gb|EDL82992.1|/2.19587e-166/rCG23653 [Rattus norvegicus]
ENSRNOG00000020298	Bag3	3.51619	0.894036	K09557|1|0.0|955|rno:293524|BCL2-associated athanogene 3	GO:0044444//cytoplasmic part	GO:0005488//binding	GO:0007417//central nervous system development;GO:0044267//cellular protein metabolic process;GO:0043066//negative regulation of apoptotic process	gi|58865450|ref|NP_001011936.1|/0/BAG family molecular chaperone regulator 3 [Rattus norvegicus]
ENSRNOG00000007379	Iah1	-2.25262	0.809141	-	-	GO:0016787//hydrolase activity	GO:0006629//lipid metabolic process	gi|198278545|ref|NP_001094010.1|/2.0667e-139/isoamyl acetate-hydrolyzing esterase 1 homolog [Rattus norvegicus]
ENSRNOG00000018566	Ctsl1	-2.92611	0.874282	K01365|1|0.0|675|rno:25697|cathepsin L [EC:3.4.22.15]	GO:0000323//lytic vacuole;GO:0009986//cell surface;GO:0016023//cytoplasmic membrane-bounded vesicle;GO:0042995//cell projection;GO:0043025//neuronal cell body	GO:0004175//endopeptidase activity;GO:0008238//exopeptidase activity;GO:0005515//protein binding	GO:0012501//programmed cell death;GO:0031669//cellular response to nutrient levels;GO:0009746;GO:0019538//protein metabolic process;GO:0007399//nervous system development;GO:0048232//male gamete generation;GO:0031960//response to corticosteroid stimulus;GO:0048754//branching morphogenesis of a tube;GO:0008406//gonad development	gi|115743|sp|P07154.2|CATL1_RAT/0/RecName: Full=Cathepsin L1; AltName: Full=Cyclic protein 2; Short=CP-2; AltName: Full=Major excreted protein; Short=MEP; Contains: RecName: Full=Procathepsin L; Contains: RecName: Full=Cathepsin L1 heavy chain; Contains: RecName: Full=Cathepsin L1 light chain; Flags: Precursor
ENSRNOG00000012091	Ppa2	-2.17692	0.841696	K01507|1|0.0|672|rno:310856|inorganic pyrophosphatase [EC:3.6.1.1]	GO:0044429//mitochondrial part	GO:0046872//metal ion binding;GO:0016462//pyrophosphatase activity	GO:0006412//translation;GO:0006796//phosphate-containing compound metabolic process	gi|209529636|ref|NP_001129343.1|/0/inorganic pyrophosphatase 2, mitochondrial [Rattus norvegicus]
ENSRNOG00000009845	Acadm	-2.59256	0.868455	K00249|1|0.0|846|rno:24158|acyl-CoA dehydrogenase [EC:1.3.99.3]	GO:0005740//mitochondrial envelope	GO:0005515//protein binding;GO:0050662//coenzyme binding;GO:0003995//acyl-CoA dehydrogenase activity	GO:0006094//gluconeogenesis;GO:0035051//cardiac cell differentiation;GO:0006635//fatty acid beta-oxidation;GO:0009437//carnitine metabolic process;GO:0005977//glycogen metabolic process;GO:0006578//amino-acid betaine biosynthetic process;GO:0010038//response to metal ion;GO:0031960//response to corticosteroid stimulus;GO:0006950//response to stress;GO:0051260//protein homooligomerization;GO:00316…	gi|292494885|ref|NP_058682.2|/0/medium-chain specific acyl-CoA dehydrogenase, mitochondrial precursor [Rattus norvegicus]
ENSRNOG00000001245	Pcbp3	3.76543	0.858504	K13162|1|0.0|657|mmu:59093|poly(rC)-binding protein 2/3/4	GO:0044444//cytoplasmic part;GO:0032991//macromolecular complex;GO:0031981//nuclear lumen	GO:0003676//nucleic acid binding	GO:0016070//RNA metabolic process	gi|149043674|gb|EDL97125.1|/0/rCG61051, isoform CRA_a [Rattus norvegicus]
ENSRNOG00000026455	Gpd1l	2.55612	0.824287	K00006|1|0.0|701|rno:363159|glycerol-3-phosphate dehydrogenase (NAD+) [EC:1.1.1.8]	GO:0043234//protein complex;GO:0044424//intracellular part	GO:0042802//identical protein binding;GO:0016616//oxidoreductase activity, acting on the CH-OH group of donors, NAD or NADP as acceptor;GO:0048037//cofactor binding;GO:0000166//nucleotide binding	GO:0006072//glycerol-3-phosphate metabolic process	gi|50510357|dbj|BAD32164.1|/0/mKIAA0089 protein [Mus musculus]
ENSRNOG00000047905	Pp3111	3.13972	0.838908	K05542|1|0.0|889|rno:246185|tRNA-dihydrouridine synthase 1 [EC:1.3.1.88]	-	GO:0016627//oxidoreductase activity, acting on the CH-CH group of donors;GO:0050662//coenzyme binding	GO:0006399//tRNA metabolic process	gi|25282413|ref|NP_742015.1|/0/tRNA-dihydrouridine(16/17) synthase [NAD(P)(+)]-like [Rattus norvegicus]
ENSRNOG00000016219	Vnn1	-2.52924	0.811981	K08069|1|0.0|1049|rno:29142|pantetheine hydrolase [EC:3.5.1.92]	GO:0031224//intrinsic to membrane;GO:0044421//extracellular region part	GO:0016811//hydrolase activity, acting on carbon-nitrogen (but not peptide) bonds, in linear amides;GO:0035091//phosphatidylinositol binding	GO:0006575//cellular modified amino acid metabolic process;GO:0006954//inflammatory response;GO:0007155//cell adhesion;GO:0033077//T cell differentiation in thymus;GO:0043066//negative regulation of apoptotic process	gi|71043730|ref|NP_001020794.1|/0/pantetheinase precursor [Rattus norvegicus]
ENSRNOG00000010370	Tnip1	3.67075	0.876891	K10352|1|7e-09|63.9|cin:100176948|myosin heavy chain;K06669|2|1e-08|63.2|xtr:100145671|structural maintenance of chromosome 3 (chondroitin sulfate proteoglycan 6)	GO:0044424//intracellular part	GO:0005488//binding	GO:0009100//glycoprotein metabolic process;GO:0045069//regulation of viral genome replication;GO:0006950//response to stress;GO:0010467//gene expression	gi|157818891|ref|NP_001102296.1|/0/TNFAIP3-interacting protein 1 [Rattus norvegicus]
ENSRNOG00000007326	Prepl	-2.26523	0.842484	K01322|1|3e-25|117|cqu:CpipJ_CPIJ001894|prolyl oligopeptidase [EC:3.4.21.26]	GO:0044444//cytoplasmic part;GO:0044444//cytoplasmic part	GO:0004175//endopeptidase activity;GO:0004175//endopeptidase activity	GO:0019538//protein metabolic process;GO:0019538//protein metabolic process	gi|166221827|sp|Q5HZA6.2|PPCEL_RAT/0/RecName: Full=Prolyl endopeptidase-like; AltName: Full=Prolylendopeptidase-like
ENSRNOG00000009974	Coq3	4.18434	0.904534	K00591|1|0.0|651|mmu:230027|hexaprenyldihydroxybenzoate methyltransferase [EC:2.1.1.114]	GO:0044429//mitochondrial part	GO:0030580//quinone cofactor methyltransferase activity;GO:0010420//polyprenyldihydroxybenzoate methyltransferase activity	GO:0019400;GO:0006743//ubiquinone metabolic process;GO:0006730//one-carbon metabolic process	gi|57015268|sp|Q63159.2|COQ3_RAT/0/RecName: Full=Hexaprenyldihydroxybenzoate methyltransferase, mitochondrial; AltName: Full=2-polyprenyl-6-hydroxyphenyl methylase; AltName: Full=3,4-dihydroxy-5-hexaprenylbenzoate methyltransferase; Short=DHHB methyltransferase; Short=DHHB-MT; Short=DHHB-MTase; AltName: Full=3-demethylubiquinone-9 3-methyltransferase; AltName: Full=Dihydroxyhexaprenylbenzoate met…
ENSRNOG00000001274	Vps29	-2.42676	0.851583	K07095|1|3e-102|372|rno:288666|	GO:0031090//organelle membrane;GO:0043231//intracellular membrane-bounded organelle	GO:0043169//cation binding;GO:0016791//phosphatase activity	GO:0006810//transport;GO:0006796//phosphate-containing compound metabolic process	gi|71042152|pdb|1Z2W|A/2.79764e-102/Chain A, Crystal Structure Of Mouse Vps29 Complexed With Mn2+
ENSRNOG00000015406	Pgm5	3.70467	0.849921	K15636|1|0.0|1060|rno:679990|phosphoglucomutase-like protein 5	GO:0043234//protein complex;GO:0005913//cell-cell adherens junction;GO:0031674//I band;GO:0005924//cell-substrate adherens junction;GO:0044291//cell-cell contact zone;GO:0032432//actin filament bundle	GO:0046872//metal ion binding;GO:0016868//intramolecular transferase activity, phosphotransferases	GO:0019318//hexose metabolic process;GO:0006875//cellular metal ion homeostasis	gi|300794610|ref|NP_001178882.1|/0/phosphoglucomutase-like protein 5 [Rattus norvegicus]
ENSRNOG00000009893	Uxt	-2.54284	0.849826	-	GO:0005815//microtubule organizing center;GO:0043231//intracellular membrane-bounded organelle;GO:0043234//protein complex	GO:0003779//actin binding;GO:0015631//tubulin binding	GO:0031023//microtubule organizing center organization;GO:0044267//cellular protein metabolic process;GO:0034643//establishment of mitochondrion localization, microtubule-mediated	gi|55741553|ref|NP_001006983.1|/6.39381e-70/protein UXT [Rattus norvegicus]
ENSRNOG00000018697	Abcb6	3.86722	0.866446	K05661|1|0.0|1627|rno:140669|ATP-binding cassette, subfamily B (MDR/TAP), member 6	GO:0043234//protein complex;GO:0031306//intrinsic to mitochondrial outer membrane	GO:0032559;GO:0005506//iron ion binding;GO:0046915//transition metal ion transmembrane transporter activity;GO:0042626//ATPase activity, coupled to transmembrane movement of substances	GO:0015691//cadmium ion transport;GO:0051181//cofactor transport;GO:0006778//porphyrin-containing compound metabolic process;GO:0009207;GO:0009636//response to toxin;GO:0006875//cellular metal ion homeostasis	gi|18034785|ref|NP_542149.1|/0/ATP-binding cassette sub-family B member 6, mitochondrial [Rattus norvegicus]
ENSRNOG00000014645	Aldh7a1	-2.48629	0.84666	K14085|1|0.0|1046|rno:291450|aldehyde dehydrogenase family 7 member A1 [EC:1.2.1.31 1.2.1.8 1.2.1.3]	GO:0044429//mitochondrial part	GO:0004030//aldehyde dehydrogenase [NAD(P)+] activity	GO:0006553//lysine metabolic process;GO:0050954//sensory perception of mechanical stimulus	gi|402766107|ref|NP_001258034.1|/0/alpha-aminoadipic semialdehyde dehydrogenase [Rattus norvegicus]
ENSRNOG00000017163	Pfkp	3.53356	0.85699	K00850|1|0.0|1436|rno:60416|6-phosphofructokinase [EC:2.7.1.11]	GO:0043234//protein complex;GO:0044444//cytoplasmic part	GO:0043169//cation binding;GO:0070061//fructose binding;GO:0008443//phosphofructokinase activity;GO:0032559	GO:0006007//glucose catabolic process;GO:0051260//protein homooligomerization;GO:0016310//phosphorylation;GO:0006000//fructose metabolic process	gi|57977273|ref|NP_996729.1|/0/6-phosphofructokinase type C [Rattus norvegicus]
ENSRNOG00000001344	ALDH2	3.61271	0.896035	K00128|1|0.0|952|rno:29539|aldehyde dehydrogenase (NAD+) [EC:1.2.1.3]	GO:0044429//mitochondrial part	GO:0004030//aldehyde dehydrogenase [NAD(P)+] activity;GO:0005515//protein binding	GO:0044238//primary metabolic process;GO:0048545//response to steroid hormone stimulus;GO:0070542//response to fatty acid;GO:0042133//neurotransmitter metabolic process;GO:0006067//ethanol metabolic process;GO:0014070//response to organic cyclic compound;GO:0048513//organ development;GO:0002237//response to molecule of bacterial origin;GO:0006950//response to stress	gi|14192933|ref|NP_115792.1|/0/aldehyde dehydrogenase, mitochondrial precursor [Rattus norvegicus]
ENSRNOG00000009756	Pacsin2	-2.00284	0.825045	K10408|1|3e-103|376|tca:664324|dynein heavy chain, axonemal;K12804|2|6e-18|93.6|dre:571331|proline-serine-threonine phosphatase interacting protein 1	GO:0044431//Golgi apparatus part;GO:0031410//cytoplasmic vesicle;GO:0044431//Golgi apparatus part;GO:0031410//cytoplasmic vesicle;GO:0044431//Golgi apparatus part;GO:0031410//cytoplasmic vesicle	GO:0005515//protein binding;GO:0016772//transferase activity, transferring phosphorus-containing groups;GO:0005515//protein binding;GO:0016772//transferase activity, transferring phosphorus-containing groups;GO:0005515//protein binding;GO:0016772//transferase activity, transferring phosphorus-containing groups	GO:0007010//cytoskeleton organization;GO:0006796//phosphate-containing compound metabolic process;GO:0023052//signaling;GO:0030100//regulation of endocytosis;GO:0007010//cytoskeleton organization;GO:0006796//phosphate-containing compound metabolic process;GO:0023052//signaling;GO:0030100//regulation of endocytosis;GO:0007010//cytoskeleton organization;GO:0006796//phosphate-containing compound met…	gi|22256944|sp|Q9QY17.2|PACN2_RAT/0/RecName: Full=Protein kinase C and casein kinase substrate in neurons 2 protein; AltName: Full=Synaptic dynamin-associated protein II; AltName: Full=Syndapin 2; AltName: Full=Syndapin-II; Short=SdpII
ENSRNOG00000010558	Ppif	3.30387	0.871463	K09565|1|5e-95|348|rno:282819|peptidyl-prolyl isomerase F (cyclophilin D) [EC:5.2.1.8]	GO:0019866//organelle inner membrane;GO:0044429//mitochondrial part	GO:0008144//drug binding;GO:0016859//cis-trans isomerase activity	GO:0044267//cellular protein metabolic process;GO:0006915//apoptotic process;GO:0007006//mitochondrial membrane organization	gi|26892289|ref|NP_758443.1|/4.05671e-94/peptidyl-prolyl cis-trans isomerase F, mitochondrial precursor [Rattus norvegicus]
ENSRNOG00000001456	Nup153	2.64299	0.820259	K14296|1|0.0|2321|rno:25281|nuclear pore complex protein Nup153	GO:0032991//macromolecular complex;GO:0031981//nuclear lumen;GO:0005635//nuclear envelope	GO:0017016//Ras GTPase binding;GO:0046914//transition metal ion binding	GO:0044238//primary metabolic process;GO:0015758//glucose transport;GO:0033036	gi|149045074|gb|EDL98160.1|/0/nucleoporin 153, isoform CRA_a [Rattus norvegicus]
ENSRNOG00000001339	PSMD9	3.70711	0.870138	K06693|1|2e-100|366|rno:161475|26S proteasome non-ATPase regulatory subunit 9	GO:0043231//intracellular membrane-bounded organelle;GO:0005838//proteasome regulatory particle	GO:0003712//transcription cofactor activity;GO:0008134//transcription factor binding	GO:0043161//proteasomal ubiquitin-dependent protein catabolic process;GO:0006357//regulation of transcription from RNA polymerase II promoter;GO:0050796//regulation of insulin secretion;GO:0051320//S phase;GO:0007050//cell cycle arrest;GO:0051439//regulation of ubiquitin-protein ligase activity involved in mitotic cell cycle;GO:0006520//cellular amino acid metabolic process;GO:0006915//apoptotic …	gi|149063326|gb|EDM13649.1|/7.37587e-100/proteasome (prosome, macropain) 26S subunit, non-ATPase, 9, isoform CRA_a [Rattus norvegicus]
ENSRNOG00000008316	Vps39	3.65369	0.832828	-	GO:0005770//late endosome;GO:0005764//lysosome;GO:0005774//vacuolar membrane	GO:0005488//binding;GO:0030695//GTPase regulator activity	GO:0019222//regulation of metabolic process;GO:0006810//transport	gi|199561474|ref|NP_001012186.2|/0/vacuolar protein sorting 39 [Rattus norvegicus]
ENSRNOG00000006859	Insig1	-2.06122	0.843999	-	GO:0043231//intracellular membrane-bounded organelle;GO:0031224//intrinsic to membrane;GO:0031090//organelle membrane	GO:0005488//binding	GO:0045596//negative regulation of cell differentiation;GO:0032868//response to insulin stimulus;GO:0006639//acylglycerol metabolic process;GO:0031327;GO:0006694//steroid biosynthetic process;GO:0008203//cholesterol metabolic process;GO:0043627//response to estrogen stimulus;GO:0042471//ear morphogenesis;GO:0032933//SREBP signaling pathway;GO:0006950//response to stress;GO:0033993//response to li…	gi|11693162|ref|NP_071787.1|/1.60654e-125/insulin-induced gene 1 protein [Rattus norvegicus]
ENSRNOG00000025310	Pop7	3.16248	0.847302	K14527|1|7e-65|247|rno:288564|ribonuclease P/MRP protein subunit RPP20 [EC:3.1.26.5]	GO:0030681;GO:0031981//nuclear lumen	GO:0005488//binding;GO:0004549//tRNA-specific ribonuclease activity	GO:0006399//tRNA metabolic process	gi|157786892|ref|NP_001099388.1|/5.27804e-64/ribonuclease P protein subunit p20 [Rattus norvegicus]
ENSRNOG00000049560	Glul	-1.6036	0.829599	K01915|1|0.0|788|rno:24957|glutamine synthetase [EC:6.3.1.2]	GO:0032991//macromolecular complex;GO:0043025//neuronal cell body;GO:0033267//axon part;GO:0005783//endoplasmic reticulum	GO:0046914//transition metal ion binding;GO:0045502//dynein binding;GO:0016597//amino acid binding;GO:0032559;GO:0016211//ammonia ligase activity;GO:0016831//carboxy-lyase activity	GO:0006541//glutamine metabolic process;GO:0050796//regulation of insulin secretion;GO:0008284//positive regulation of cell proliferation;GO:0051259//protein oligomerization;GO:0009746;GO:0001505//regulation of neurotransmitter levels;GO:0006536//glutamate metabolic process;GO:0050806//positive regulation of synaptic transmission	gi|142349612|ref|NP_058769.4|/0/glutamine synthetase [Rattus norvegicus]
ENSRNOG00000017977	Smpd1	3.27076	0.863248	K12350|1|0.0|1255|rno:308909|sphingomyelin phosphodiesterase [EC:3.1.4.12]	GO:0000323//lytic vacuole;GO:0030141//secretory granule;GO:0044421//extracellular region part	GO:0004620//phospholipase activity	GO:0006684//sphingomyelin metabolic process;GO:0006915//apoptotic process;GO:0006672//ceramide metabolic process;GO:0014073	gi|55741778|ref|NP_001006998.1|/0/sphingomyelin phosphodiesterase [Rattus norvegicus]
ENSRNOG00000005053	Egln3	3.04598	0.862501	K09592|1|0.0|706|rno:54702|hypoxia-inducible factor prolyl hydroxylase [EC:1.14.11.-]	GO:0043231//intracellular membrane-bounded organelle	GO:0046914//transition metal ion binding;GO:0019842//vitamin binding;GO:0016701//oxidoreductase activity, acting on single donors with incorporation of molecular oxygen	GO:0008283//cell proliferation;GO:0006950//response to stress;GO:0012501//programmed cell death;GO:0008152//metabolic process	gi|149051230|gb|EDM03403.1|/0/rCG62399 [Rattus norvegicus]
ENSRNOG00000000571	Psap	3.55708	0.894488	K12382|1|0.0|1064|rno:25524|saposin	GO:0005764//lysosome;GO:0044421//extracellular region part	-	GO:0006643//membrane lipid metabolic process;GO:0040007//growth;GO:0006869//lipid transport;GO:0010627//regulation of intracellular protein kinase cascade;GO:0003006//developmental process involved in reproduction	gi|149038761|gb|EDL93050.1|/0/prosaposin, isoform CRA_a [Rattus norvegicus]
ENSRNOG00000003253	Qdpr	-2.52978	0.842474	K00357|1|2e-126|452|rno:64192|dihydropteridine reductase [EC:1.5.1.34]	GO:0043231//intracellular membrane-bounded organelle;GO:0044444//cytoplasmic part	GO:0051287//NAD binding;GO:0016646//oxidoreductase activity, acting on the CH-NH group of donors, NAD or NADP as acceptor;GO:0042802//identical protein binding;GO:0050661//NADP binding	GO:0006558//L-phenylalanine metabolic process;GO:0010038//response to metal ion;GO:0009108//coenzyme biosynthetic process;GO:0042558//pteridine-containing compound metabolic process;GO:0043434//response to peptide hormone stimulus;GO:0042493//response to drug	gi|149047261|gb|EDL99930.1|/4.92055e-138/quinoid dihydropteridine reductase, isoform CRA_a [Rattus norvegicus]
ENSRNOG00000010134	Acot2	1.46161	0.810413	K01068|1|0.0|854|rno:192272|palmitoyl-CoA hydrolase [EC:3.1.2.2]	GO:0044429//mitochondrial part	GO:0005488//binding	GO:0000038//very long-chain fatty acid metabolic process;GO:0009719;GO:0042221//response to chemical stimulus;GO:0009991//response to extracellular stimulus;GO:0006732//coenzyme metabolic process;GO:0006950//response to stress	gi|48675862|ref|NP_620262.2|/0/acyl-coenzyme A thioesterase 2, mitochondrial [Rattus norvegicus]
ENSRNOG00000009716	Casc3	3.05401	0.806437	K14323|1|0.0|1013|rno:259170|protein CASC3	GO:0032991//macromolecular complex;GO:0031981//nuclear lumen;GO:0005737//cytoplasm	GO:0005515//protein binding	GO:0006810//transport;GO:0006396//RNA processing;GO:0016071//mRNA metabolic process;GO:0006403//RNA localization	gi|149054141|gb|EDM05958.1|/0/cancer susceptibility candidate 3 [Rattus norvegicus]
ENSRNOG00000003289	Lap3	-2.20436	0.832408	K11142|1|0.0|971|rno:289668|cytosol aminopeptidase [EC:3.4.11.1 3.4.11.5]	GO:0044431//Golgi apparatus part;GO:0031981//nuclear lumen;GO:0044431//Golgi apparatus part;GO:0031981//nuclear lumen	GO:0046914//transition metal ion binding;GO:0008238//exopeptidase activity;GO:0008237//metallopeptidase activity;GO:0046914//transition metal ion binding;GO:0008238//exopeptidase activity;GO:0008237//metallopeptidase activity	GO:0019538//protein metabolic process;GO:0019538//protein metabolic process	gi|58865398|ref|NP_001011910.1|/0/cytosol aminopeptidase [Rattus norvegicus]
ENSRNOG00000011414	Psmc3	3.13986	0.872957	K03065|1|0.0|887|ptr:451172|26S proteasome regulatory subunit T5	GO:0043231//intracellular membrane-bounded organelle;GO:0043234//protein complex;GO:0044444//cytoplasmic part	GO:0016462//pyrophosphatase activity;GO:0003712//transcription cofactor activity;GO:0032559	GO:0043161//proteasomal ubiquitin-dependent protein catabolic process;GO:0051320//S phase;GO:0007050//cell cycle arrest;GO:0016070//RNA metabolic process;GO:0051439//regulation of ubiquitin-protein ligase activity involved in mitotic cell cycle;GO:0006520//cellular amino acid metabolic process;GO:0006915//apoptotic process;GO:0030330//DNA damage response, signal transduction by p53 class mediator…	gi|74185161|dbj|BAE39181.1|/0/unnamed protein product [Mus musculus]
ENSRNOG00000003980	Ttc1	3.00442	0.857484	K09527|1|8e-18|92.4|dre:100535346|DnaJ homolog subfamily C member 7	-	GO:0005515//protein binding	GO:0044267//cellular protein metabolic process	gi|53850588|ref|NP_001005529.1|/2.9575e-155/tetratricopeptide repeat protein 1 [Rattus norvegicus]
ENSRNOG00000011158	Ppp2r2a	3.67717	0.888608	K04354|1|0.0|870|rno:117104|protein phosphatase 2 (formerly 2A), regulatory subunit B	GO:0008287//protein serine/threonine phosphatase complex	GO:0005488//binding;GO:0004721//phosphoprotein phosphatase activity;GO:0019888//protein phosphatase regulator activity	GO:0019222//regulation of metabolic process;GO:0014072;GO:0006464//cellular protein modification process;GO:0023052//signaling	gi|60360266|dbj|BAD90377.1|/0/mKIAA4213 protein [Mus musculus]
ENSRNOG00000002914	Trmt1	-2.85635	0.848838	K00555|1|0.0|885|rno:288914|tRNA (guanine26-N2/guanine27-N2)-dimethyltransferase [EC:2.1.1.215 2.1.1.216]	-	GO:0008170//N-methyltransferase activity	GO:0006399//tRNA metabolic process	gi|62078475|ref|NP_001013892.1|/0/N(2),N(2)-dimethylguanosine tRNA methyltransferase [Rattus norvegicus]
ENSRNOG00000016866	Fhl2	3.51273	0.890996	K14380|1|0.0|633|rno:63839|four and a half LIM domains protein 2	GO:0043231//intracellular membrane-bounded organelle;GO:0005856//cytoskeleton;GO:0031672//A band;GO:0005924//cell-substrate adherens junction;GO:0031674//I band	GO:0003712//transcription cofactor activity;GO:0046914//transition metal ion binding;GO:0035258//steroid hormone receptor binding	GO:0006629//lipid metabolic process;GO:0009719;GO:0006355//regulation of transcription, DNA-dependent;GO:0030518//intracellular steroid hormone receptor signaling pathway	gi|13928940|ref|NP_113865.1|/3.41926e-180/four and a half LIM domains protein 2 [Rattus norvegicus]
ENSRNOG00000019380	Cers5	3.14637	0.801925	K04710|1|0.0|778|rno:366984|ceramide synthetase [EC:2.3.1.24]	GO:0031224//intrinsic to membrane;GO:0031090//organelle membrane;GO:0005635//nuclear envelope	GO:0001071//nucleic acid binding transcription factor activity;GO:0003677//DNA binding;GO:0016410//N-acyltransferase activity	GO:0006672//ceramide metabolic process;GO:0006351//transcription, DNA-dependent	gi|157823433|ref|NP_001102463.1|/0/LAG1 longevity assurance homolog 5 [Rattus norvegicus]
ENSRNOG00000021682	Dcakd	-2.08754	0.802367	K00859|1|8e-39|162|cbr:CBG10005|dephospho-CoA kinase [EC:2.7.1.24];K02318|3|9e-27|122|bfo:BRAFLDRAFT_250730|phosphopantetheine adenylyltransferase / dephospho-CoA kinase [EC:2.7.7.3 2.7.1.24]	GO:0043231//intracellular membrane-bounded organelle	GO:0016301//kinase activity;GO:0032559	GO:0009108//coenzyme biosynthetic process;GO:0006796//phosphate-containing compound metabolic process	gi|56090393|ref|NP_001007725.1|/4.70334e-126/dephospho-CoA kinase domain-containing protein [Rattus norvegicus]
ENSRNOG00000018077	Agpat6	-2.56851	0.824887	K13506|1|0.0|848|rno:290843|glycerol-3-phosphate O-acyltransferase 3/4 [EC:2.3.1.15]	GO:0031227//intrinsic to endoplasmic reticulum membrane	GO:0016411//acylglycerol O-acyltransferase activity	GO:0032787//monocarboxylic acid metabolic process;GO:0006641//triglyceride metabolic process;GO:0002068;GO:0046470//phosphatidylcholine metabolic process;GO:0035264//multicellular organism growth;GO:0048732//gland development;GO:0007589//body fluid secretion;GO:0006732//coenzyme metabolic process	gi|114326232|ref|NP_001041314.1|/0/glycerol-3-phosphate acyltransferase 6 [Rattus norvegicus]
ENSRNOG00000012957	Sh3glb1	3.42385	0.884738	K11248|1|0.0|675|rno:292156|endophilin-B	GO:0032991//macromolecular complex;GO:0031966//mitochondrial membrane;GO:0012505//endomembrane system	GO:0030674//protein binding, bridging;GO:0019904//protein domain specific binding;GO:0042802//identical protein binding;GO:0008289//lipid binding;GO:0071617//lysophospholipid acyltransferase activity	GO:0006458//'de novo' protein folding;GO:0046394;GO:0030035//microspike assembly;GO:0023052//signaling;GO:0006917//induction of apoptosis;GO:0006644//phospholipid metabolic process;GO:0043066//negative regulation of apoptotic process	gi|50510503|dbj|BAD32237.1|/0/mKIAA0491 protein [Mus musculus]
ENSRNOG00000012210	Sptlc2	-2.47671	0.841243	K00654|1|0.0|1088|rno:366697|serine palmitoyltransferase [EC:2.3.1.50]	GO:0031224//intrinsic to membrane;GO:0031211//endoplasmic reticulum palmitoyltransferase complex	GO:0016454;GO:0048037//cofactor binding	GO:0006684//sphingomyelin metabolic process;GO:0006667//sphinganine metabolic process;GO:0006670//sphingosine metabolic process;GO:0006672//ceramide metabolic process	gi|79749411|ref|NP_001032174.1|/0/serine palmitoyltransferase 2 [Rattus norvegicus]
ENSRNOG00000004479	Aurka	3.40264	0.842327	K11481|1|0.0|804|rno:261730|aurora kinase A [EC:2.7.11.1]	GO:0005815//microtubule organizing center;GO:0043231//intracellular membrane-bounded organelle;GO:0000922//spindle pole	GO:0004672//protein kinase activity;GO:0019900//kinase binding;GO:0032559	GO:0043161//proteasomal ubiquitin-dependent protein catabolic process;GO:0010608//posttranscriptional regulation of gene expression;GO:0043627//response to estrogen stimulus;GO:0006796//phosphate-containing compound metabolic process;GO:0048017//inositol lipid-mediated signaling;GO:0000087//M phase of mitotic cell cycle;GO:0000226//microtubule cytoskeleton organization;GO:0006464//cellular protei…	gi|76253851|ref|NP_695208.2|/0/aurora kinase A [Rattus norvegicus]
ENSRNOG00000019813	Ppp4c	3.38023	0.862238	K15423|1|0.0|636|mdo:100012739|serine/threonine-protein phosphatase 4 catalytic subunit [EC:3.1.3.16]	GO:0005815//microtubule organizing center;GO:0043231//intracellular membrane-bounded organelle;GO:0008287//protein serine/threonine phosphatase complex	GO:0043169//cation binding;GO:0004721//phosphoprotein phosphatase activity;GO:0004702//receptor signaling protein serine/threonine kinase activity	GO:0048646//anatomical structure formation involved in morphogenesis;GO:0006796//phosphate-containing compound metabolic process;GO:0007010//cytoskeleton organization;GO:0006464//cellular protein modification process	gi|440907053|gb|ELR57245.1|/0/Serine/threonine-protein phosphatase 4 catalytic subunit, partial [Bos grunniens mutus]
ENSRNOG00000003653	Fh	-2.70095	0.869012	K01679|1|0.0|976|rno:24368|fumarate hydratase, class II [EC:4.2.1.2]	GO:0043234//protein complex;GO:0044459//plasma membrane part;GO:0044429//mitochondrial part	GO:0016836//hydro-lyase activity	GO:0009060//aerobic respiration;GO:0001894//tissue homeostasis;GO:0043648//dicarboxylic acid metabolic process	gi|158186722|ref|NP_058701.2|/0/fumarate hydratase, mitochondrial precursor [Rattus norvegicus]
ENSRNOG00000043387	Cpe	-2.29587	0.859609	K01294|1|0.0|699|rno:25669|carboxypeptidase E [EC:3.4.17.10]	GO:0016023//cytoplasmic membrane-bounded vesicle;GO:0016020//membrane;GO:0044421//extracellular region part	GO:0046914//transition metal ion binding;GO:0008235//metalloexopeptidase activity	GO:0007186//G-protein coupled receptor signaling pathway;GO:0016486//peptide hormone processing;GO:0003208//cardiac ventricle morphogenesis;GO:0043412//macromolecule modification;GO:0044237//cellular metabolic process	gi|55249691|gb|AAH85762.1|/0/Carboxypeptidase E [Rattus norvegicus]
ENSRNOG00000003307	Gcdh	-2.79183	0.857389	K00252|1|0.0|869|rno:364975|glutaryl-CoA dehydrogenase [EC:1.3.99.7]	GO:0019866//organelle inner membrane;GO:0043231//intracellular membrane-bounded organelle	GO:0003995//acyl-CoA dehydrogenase activity;GO:0050662//coenzyme binding;GO:0005504//fatty acid binding	GO:0006631//fatty acid metabolic process;GO:0035337	gi|157820807|ref|NP_001102366.1|/0/glutaryl-CoA dehydrogenase, mitochondrial [Rattus norvegicus]
ENSRNOG00000000279	Rtn4ip1	3.85525	0.85456	K00344|1|2e-17|92.0|tgu:100226702|NADPH2:quinone reductase [EC:1.6.5.5];K10133|3|2e-17|91.7|hmg:100208988|tumor protein p53-inducible protein 3 [EC:1.-.-.-]	GO:0043231//intracellular membrane-bounded organelle	GO:0046914//transition metal ion binding;GO:0003824//catalytic activity	GO:0008152//metabolic process	gi|157821769|ref|NP_001101114.1|/0/reticulon 4 interacting protein 1 [Rattus norvegicus]
ENSRNOG00000003667	DMD	3.81938	0.828106	K10366|1|0.0|3875|mmu:13405|dystrophin	GO:0016323//basolateral plasma membrane;GO:0044463;GO:0031674//I band;GO:0043234//protein complex	GO:0019899//enzyme binding	GO:0006351//transcription, DNA-dependent;GO:0014706//striated muscle tissue development;GO:0048513//organ development;GO:0021604;GO:0019725//cellular homeostasis;GO:0043112//receptor metabolic process	gi|6681203|ref|NP_031894.1|/0/dystrophin [Mus musculus]
ENSRNOG00000019983	Mlx	-1.97948	0.818565	K09113|1|9e-153|541|rno:360631|MAX-like protein X	GO:0043231//intracellular membrane-bounded organelle	GO:0003676//nucleic acid binding;GO:0042802//identical protein binding;GO:0001071//nucleic acid binding transcription factor activity;GO:0046983//protein dimerization activity	GO:0009893//positive regulation of metabolic process;GO:0006355//regulation of transcription, DNA-dependent;GO:0015980//energy derivation by oxidation of organic compounds;GO:0051169//nuclear transport	gi|77627983|ref|NP_001029284.1|/7.57903e-152/transcription factor-like 4 [Rattus norvegicus]
ENSRNOG00000032487	Sts	-2.71738	0.840917	K01131|1|0.0|1134|rno:24800|steryl-sulfatase [EC:3.1.6.2]	GO:0031224//intrinsic to membrane;GO:0043231//intracellular membrane-bounded organelle;GO:0031090//organelle membrane;GO:0012505//endomembrane system	GO:0043169//cation binding;GO:0008484//sulfuric ester hydrolase activity	GO:0006629//lipid metabolic process;GO:0048545//response to steroid hormone stimulus;GO:0009628//response to abiotic stimulus;GO:0008544//epidermis development;GO:0022414//reproductive process;GO:0007610//behavior;GO:0008283//cell proliferation	gi|149042368|gb|EDL96075.1|/0/steroid sulfatase [Rattus norvegicus]
ENSRNOG00000002642	Ptges3	3.21097	0.878058	K15730|1|9e-112|404|ssc:100155956|cytosolic prostaglandin-E synthase [EC:5.3.99.3]	GO:0044427//chromosomal part;GO:0044444//cytoplasmic part;GO:0030529//ribonucleoprotein complex	GO:0003964//RNA-directed DNA polymerase activity;GO:0016860//intramolecular oxidoreductase activity;GO:0005515//protein binding	GO:0006693//prostaglandin metabolic process;GO:0042026//protein refolding;GO:0006259//DNA metabolic process;GO:0009058//biosynthetic process;GO:0008544//epidermis development;GO:0005977//glycogen metabolic process;GO:0031958	gi|148692593|gb|EDL24540.1|/3.04509e-123/prostaglandin E synthase 3 (cytosolic), isoform CRA_b [Mus musculus]
ENSRNOG00000029726	Gstm1	2.61352	0.855296	K00799|1|2e-126|452|rno:24423|glutathione S-transferase [EC:2.5.1.18]	GO:0044424//intracellular part	GO:0042802//identical protein binding;GO:0008289//lipid binding;GO:0016765//transferase activity, transferring alkyl or aryl (other than methyl) groups	GO:0006790//sulfur compound metabolic process;GO:0007606//sensory perception of chemical stimulus;GO:0001101//response to acid;GO:0010038//response to metal ion	gi|149025664|gb|EDL81907.1|/1.78467e-126/rCG29047, isoform CRA_b [Rattus norvegicus]
ENSRNOG00000005538	Psmd11	3.57891	0.88742	K03036|1|0.0|746|rno:303353|26S proteasome regulatory subunit N6	GO:0043234//protein complex	GO:0005488//binding	GO:0043161//proteasomal ubiquitin-dependent protein catabolic process;GO:0051320//S phase;GO:0007050//cell cycle arrest;GO:0016070//RNA metabolic process;GO:0051439//regulation of ubiquitin-protein ligase activity involved in mitotic cell cycle;GO:0006520//cellular amino acid metabolic process;GO:0006915//apoptotic process;GO:0030330//DNA damage response, signal transduction by p53 class mediator	gi|157820107|ref|NP_001100497.1|/0/26S proteasome non-ATPase regulatory subunit 11 [Rattus norvegicus]
ENSRNOG00000030408	Dnajb12	3.97589	0.878069	K09518|1|0.0|664|rno:294513|DnaJ homolog subfamily B member 12	GO:0031224//intrinsic to membrane;GO:0043231//intracellular membrane-bounded organelle	GO:0005515//protein binding	GO:0044267//cellular protein metabolic process	gi|344274603|ref|XP_003409104.1|/0/PREDICTED: dnaJ homolog subfamily B member 12-like [Loxodonta africana]
ENSRNOG00000050051	Pin4	3.55027	0.881687	K09579|1|8e-57|219|pon:100432587|peptidyl-prolyl cis-trans isomerase NIMA-interacting 4 [EC:5.2.1.8]	GO:0030529//ribonucleoprotein complex;GO:0044429//mitochondrial part;GO:0031981//nuclear lumen;GO:0015630//microtubule cytoskeleton	GO:0016859//cis-trans isomerase activity;GO:0043566//structure-specific DNA binding	GO:0042254//ribosome biogenesis;GO:0044267//cellular protein metabolic process	gi|426396404|ref|XP_004064434.1|/8.36391e-56/PREDICTED: peptidyl-prolyl cis-trans isomerase NIMA-interacting 4 isoform 1 [Gorilla gorilla gorilla]
ENSRNOG00000046799	Phb	2.84941	0.870085	K09655|1|3e-08|60.8|cfa:491067|beta-1,4-N-acetylgalactosaminyltransferase 2 [EC:2.4.1.-]	GO:0031981//nuclear lumen;GO:0005743//mitochondrial inner membrane;GO:0016021//integral to membrane;GO:0031312	GO:0043565//sequence-specific DNA binding;GO:0019899//enzyme binding	GO:0000122//negative regulation of transcription from RNA polymerase II promoter;GO:0006476//protein deacetylation;GO:0033144//negative regulation of intracellular steroid hormone receptor signaling pathway;GO:0008283//cell proliferation;GO:0006259//DNA metabolic process;GO:0006915//apoptotic process;GO:0009887//organ morphogenesis;GO:0009725//response to hormone stimulus;GO:0031958	gi|6679299|ref|NP_032857.1|/4.97985e-131/prohibitin [Mus musculus]
ENSRNOG00000029042	MT-ND6	4.56456	0.937614	K03884|1|8e-81|299|rno:26203|NADH-ubiquinone oxidoreductase chain 6 [EC:1.6.5.3]	GO:0031224//intrinsic to membrane;GO:0043231//intracellular membrane-bounded organelle	GO:0050136//NADH dehydrogenase (quinone) activity	GO:0008152//metabolic process	gi|110189726|ref|YP_665640.1|/5.27255e-80/NADH dehydrogenase subunit 6 [Rattus norvegicus]
ENSRNOG00000011384	Aimp1	3.2177	0.87423	K15437|1|3e-144|511|rno:114632|aminoacyl tRNA synthase complex-interacting multifunctional protein 1	GO:0043231//intracellular membrane-bounded organelle;GO:0031410//cytoplasmic vesicle;GO:0043234//protein complex;GO:0044421//extracellular region part	GO:0005102//receptor binding;GO:0042802//identical protein binding;GO:0003723//RNA binding	GO:0001525//angiogenesis;GO:0042221//response to chemical stimulus;GO:0012501//programmed cell death;GO:0006412//translation;GO:0001935//endothelial cell proliferation;GO:0023052//signaling;GO:0007154//cell communication;GO:0002252;GO:0019318//hexose metabolic process;GO:0006952//defense response	gi|75832035|ref|NP_446209.1|/2.17e-143/aminoacyl tRNA synthase complex-interacting multifunctional protein 1 [Rattus norvegicus]
ENSRNOG00000007775	Cmpk1	3.66803	0.874093	K13800|1|9e-129|461|rno:298410|UMP-CMP kinase [EC:2.7.4.- 2.7.4.14]	GO:0043231//intracellular membrane-bounded organelle;GO:0044444//cytoplasmic part	GO:0016776//phosphotransferase activity, phosphate group as acceptor;GO:0019201//nucleotide kinase activity;GO:0032559;GO:0019206//nucleoside kinase activity	GO:0009123;GO:0006221//pyrimidine nucleotide biosynthetic process;GO:0006796//phosphate-containing compound metabolic process	gi|71043752|ref|NP_001020826.1|/7.20711e-128/UMP-CMP kinase [Rattus norvegicus]
ENSRNOG00000017801	Atf4	-2.28119	0.856138	K04374|1|5e-169|594|rno:79255|activating transcription factor 4	GO:0043231//intracellular membrane-bounded organelle;GO:0043234//protein complex;GO:0032589//neuron projection membrane	GO:0001071//nucleic acid binding transcription factor activity;GO:0003677//DNA binding;GO:0005515//protein binding	GO:0019752//carboxylic acid metabolic process;GO:0006357//regulation of transcription from RNA polymerase II promoter;GO:0007186//G-protein coupled receptor signaling pathway;GO:0033554//cellular response to stress;GO:0006006//glucose metabolic process	gi|13242322|ref|NP_077379.1|/3.85357e-168/cyclic AMP-dependent transcription factor ATF-4 [Rattus norvegicus]
ENSRNOG00000010452	Cycs	-1.16665	0.800852	K08738|1|5e-57|222|rno:25309|cytochrome c	GO:0005743//mitochondrial inner membrane;GO:0044425//membrane part	GO:0009055//electron carrier activity;GO:0005506//iron ion binding	GO:0000737//DNA catabolic process, endonucleolytic;GO:0072593//reactive oxygen species metabolic process;GO:0022904//respiratory electron transport chain;GO:0051234//establishment of localization;GO:0006919//activation of cysteine-type endopeptidase activity involved in apoptotic process;GO:0006950//response to stress	gi|395857982|ref|XP_003801357.1|/6.74016e-57/PREDICTED: uncharacterized protein LOC100960229 [Otolemur garnettii]
ENSRNOG00000019601	Mapk3	-1.93334	0.83062	K04371|1|0.0|711|mmu:26417|extracellular signal-regulated kinase 1/2 [EC:2.7.11.24]	GO:0031981//nuclear lumen;GO:0032991//macromolecular complex;GO:0044444//cytoplasmic part	GO:0032559;GO:0045309//protein phosphorylated amino acid binding;GO:0004702//receptor signaling protein serine/threonine kinase activity;GO:0019899//enzyme binding	GO:0001775//cell activation;GO:0009888//tissue development;GO:0009612//response to mechanical stimulus;GO:0007169//transmembrane receptor protein tyrosine kinase signaling pathway;GO:0006464//cellular protein modification process;GO:0043331//response to dsRNA;GO:0009653//anatomical structure morphogenesis;GO:0007600//sensory perception;GO:0006935//chemotaxis;GO:0006796//phosphate-containing compo…	gi|515499|gb|AAA20009.1|/0/microtubule-associated protein-2 kinase, partial [Rattus norvegicus]
ENSRNOG00000011419	Aldh6a1	2.71693	0.867129	K00140|1|0.0|1005|rno:81708|malonate-semialdehyde dehydrogenase (acetylating) / methylmalonate-semialdehyde dehydrogenase [EC:1.2.1.18 1.2.1.27]	GO:0031981//nuclear lumen	GO:0016788//hydrolase activity, acting on ester bonds;GO:0016620//oxidoreductase activity, acting on the aldehyde or oxo group of donors, NAD or NADP as acceptor;GO:0005504//fatty acid binding	GO:0006573//valine metabolic process;GO:0009063//cellular amino acid catabolic process;GO:0006208//pyrimidine nucleobase catabolic process;GO:0045444//fat cell differentiation	gi|145651820|ref|NP_112319.2|/0/methylmalonate-semialdehyde dehydrogenase [acylating], mitochondrial precursor [Rattus norvegicus]
ENSRNOG00000018704	Nolc1	4.16751	0.903008	-	GO:0016604//nuclear body	GO:0005515//protein binding;GO:0001071//nucleic acid binding transcription factor activity;GO:0030515//snoRNA binding;GO:0005048//signal sequence binding	GO:0006355//regulation of transcription, DNA-dependent;GO:0008283//cell proliferation;GO:0016074//snoRNA metabolic process;GO:0006997//nucleus organization;GO:0006950//response to stress;GO:0006606//protein import into nucleus	gi|205752|gb|AAA41719.1|/3.56463e-79/Nopp140 [Rattus norvegicus]
ENSRNOG00000015077	Acsf3	3.93308	0.877122	K01896|1|1e-32|141|gga:426992|medium-chain acyl-CoA synthetase [EC:6.2.1.2]	GO:0043231//intracellular membrane-bounded organelle	GO:0016877//ligase activity, forming carbon-sulfur bonds;GO:0032559	GO:0032787//monocarboxylic acid metabolic process;GO:0044238//primary metabolic process	gi|149038409|gb|EDL92769.1|/0/similar to C50H11.1, isoform CRA_a [Rattus norvegicus]
ENSRNOG00000003919	Rps6kb1	3.9897	0.870653	K04688|1|0.0|1051|rno:83840|p70 ribosomal S6 kinase [EC:2.7.11.1]	GO:0030529//ribonucleoprotein complex;GO:0031966//mitochondrial membrane;GO:0044459//plasma membrane part	GO:0004674//protein serine/threonine kinase activity;GO:0032559	GO:0006915//apoptotic process;GO:0014874;GO:0007346//regulation of mitotic cell cycle;GO:0008284//positive regulation of cell proliferation;GO:0048017//inositol lipid-mediated signaling;GO:0043434//response to peptide hormone stimulus;GO:0003006//developmental process involved in reproduction;GO:0007169//transmembrane receptor protein tyrosine kinase signaling pathway;GO:0007243//intracellular pr…	gi|54041073|sp|P67999.1|KS6B1_RAT/0/RecName: Full=Ribosomal protein S6 kinase beta-1; Short=S6K-beta-1; Short=S6K1; AltName: Full=70 kDa ribosomal protein S6 kinase 1; Short=P70S6K1; Short=p70-S6K 1; AltName: Full=Ribosomal protein S6 kinase I; AltName: Full=p70 ribosomal S6 kinase alpha; Short=p70 S6 kinase alpha; Short=p70 S6K-alpha; Short=p70 S6KA
ENSRNOG00000020347	Nup98	3.63996	0.849374	K14297|1|0.0|1439|rno:81738|nuclear pore complex protein Nup98-Nup96	GO:0005643//nuclear pore;GO:0000775//chromosome, centromeric region;GO:0031981//nuclear lumen;GO:0031981//nuclear lumen;GO:0005643//nuclear pore;GO:0000775//chromosome, centromeric region;GO:0044444//cytoplasmic part	GO:0005488//binding;GO:0005488//binding;GO:0005198//structural molecule activity	GO:0006259//DNA metabolic process;GO:0006259//DNA metabolic process;GO:0050658//RNA transport;GO:0051704;GO:0006606//protein import into nucleus;GO:0015758//glucose transport;GO:0007067//mitosis;GO:0006997//nucleus organization	gi|148684636|gb|EDL16583.1|/0/nucleoporin 98, isoform CRA_b [Mus musculus]
ENSRNOG00000002467	Pgk1	1.77627	0.845219	K00927|1|0.0|826|rno:24644|phosphoglycerate kinase [EC:2.7.2.3]	GO:0044444//cytoplasmic part	GO:0016301//kinase activity;GO:0032559	GO:0006796//phosphate-containing compound metabolic process;GO:0006007//glucose catabolic process	gi|40254752|ref|NP_445743.2|/0/phosphoglycerate kinase 1 [Rattus norvegicus]
ENSRNOG00000019760	Oxnad1	2.51073	0.812885	K15455|1|6e-15|84.0|rno:680594|diphthamide biosynthesis protein 3	GO:0043231//intracellular membrane-bounded organelle	GO:0003824//catalytic activity	GO:0008152//metabolic process	gi|148692881|gb|EDL24828.1|/0/oxidoreductase NAD-binding domain containing 1, isoform CRA_c [Mus musculus]
ENSRNOG00000020876	Bax	1.95198	0.814936	K02159|1|7e-100|363|rno:24887|apoptosis regulator BAX	GO:0031224//intrinsic to membrane;GO:0031966//mitochondrial membrane	GO:0051400//BH domain binding;GO:0042802//identical protein binding;GO:0046983//protein dimerization activity	GO:0010524//positive regulation of calcium ion transport into cytosol;GO:0001894//tissue homeostasis;GO:0035107//appendage morphogenesis;GO:0019740//nitrogen utilization;GO:0007006//mitochondrial membrane organization;GO:0048050//post-embryonic eye morphogenesis;GO:0002260//lymphocyte homeostasis;GO:0022603//regulation of anatomical structure morphogenesis;GO:0008406//gonad development;GO:0002339…	gi|386869283|ref|NP_058755.2|/6.00929e-100/apoptosis regulator BAX [Rattus norvegicus]
ENSRNOG00000000658	Acacb	3.1598	0.831429	K11262|1|0.0|4468|rno:116719|acetyl-CoA carboxylase / biotin carboxylase [EC:6.4.1.2 6.3.4.14]	GO:0043231//intracellular membrane-bounded organelle;GO:0044444//cytoplasmic part;GO:0043231//intracellular membrane-bounded organelle;GO:0044444//cytoplasmic part	GO:0019842//vitamin binding;GO:0043169//cation binding;GO:0016879//ligase activity, forming carbon-nitrogen bonds;GO:0016421//CoA carboxylase activity;GO:0032559;GO:0019842//vitamin binding;GO:0043169//cation binding;GO:0016879//ligase activity, forming carbon-nitrogen bonds;GO:0016421//CoA carboxylase activity;GO:0032559	GO:0009893//positive regulation of metabolic process;GO:0051260//protein homooligomerization;GO:0003333//amino acid transmembrane transport;GO:0019217//regulation of fatty acid metabolic process;GO:0006732//coenzyme metabolic process;GO:0015980//energy derivation by oxidation of organic compounds;GO:0010033//response to organic substance;GO:0009893//positive regulation of metabolic process;GO:005…	gi|94963134|gb|ABF48724.1|/0/acetyl-Coenzyme A carboxylase 2 [Rattus norvegicus]
ENSRNOG00000021177	Cox8a	-2.01325	0.852435	K02273|1|6e-27|120|rno:171335|cytochrome c oxidase subunit 8	GO:0031224//intrinsic to membrane;GO:0005746//mitochondrial respiratory chain	GO:0015002//heme-copper terminal oxidase activity	GO:0006818//hydrogen transport;GO:0006811//ion transport;GO:0008152//metabolic process	gi|148700340|gb|EDL32287.1|/3.98716e-39/mCG51330 [Mus musculus]
ENSRNOG00000009536	Pgp	3.54679	0.873535	K01091|1|9e-175|614|rno:287115|phosphoglycolate phosphatase [EC:3.1.3.18]	-	GO:0016791//phosphatase activity	GO:0044238//primary metabolic process;GO:0006796//phosphate-containing compound metabolic process	gi|281332119|ref|NP_001162623.1|/7.45736e-174/phosphoglycolate phosphatase [Rattus norvegicus]
ENSRNOG00000011617	Dguok	-2.46294	0.826612	K00904|1|1e-151|536|rno:297389|deoxyguanosine kinase [EC:2.7.1.113]	GO:0044429//mitochondrial part	GO:0032559;GO:0019136//deoxynucleoside kinase activity	GO:0046128;GO:0009215;GO:0009124//nucleoside monophosphate biosynthetic process;GO:0006796//phosphate-containing compound metabolic process;GO:0009112;GO:0010975//regulation of neuron projection development;GO:0006464//cellular protein modification process	gi|157819621|ref|NP_001100072.1|/7.54448e-151/deoxyguanosine kinase, mitochondrial [Rattus norvegicus]
ENSRNOG00000017307	Prss23	3.86368	0.900515	K09627|1|0.0|777|rno:308807|protease, serine, 23 [EC:3.4.21.-]	GO:0043231//intracellular membrane-bounded organelle	GO:0004175//endopeptidase activity	GO:0019538//protein metabolic process	gi|56090287|ref|NP_001007692.1|/0/serine protease 23 precursor [Rattus norvegicus]
ENSRNOG00000043094	Oxct1	4.92175	0.9501	K01027|1|0.0|996|rno:690163|3-oxoacid CoA-transferase [EC:2.8.3.5]	GO:0044429//mitochondrial part	GO:0008410//CoA-transferase activity;GO:0042802//identical protein binding	GO:0007417//central nervous system development;GO:0050796//regulation of insulin secretion;GO:0006629//lipid metabolic process;GO:0009888//tissue development;GO:0044248//cellular catabolic process;GO:0001101//response to acid;GO:0009719;GO:0031667//response to nutrient levels;GO:0001678//cellular glucose homeostasis;GO:0048513//organ development;GO:0006950//response to stress;GO:0010033//response…	gi|189181716|ref|NP_001121052.1|/0/succinyl-CoA:3-ketoacid coenzyme A transferase 1, mitochondrial precursor [Rattus norvegicus]
ENSRNOG00000014883	Git1	-2.70029	0.857726	K05737|1|0.0|1398|rno:83709|G protein-coupled receptor kinase interactor 1	GO:0005924//cell-substrate adherens junction;GO:0044424//intracellular part	GO:0016772//transferase activity, transferring phosphorus-containing groups;GO:0005083//small GTPase regulator activity;GO:0008047//enzyme activator activity;GO:0004871//signal transducer activity;GO:0046914//transition metal ion binding;GO:0042802//identical protein binding;GO:0051020//GTPase binding	GO:0043087//regulation of GTPase activity;GO:0007186//G-protein coupled receptor signaling pathway;GO:0006796//phosphate-containing compound metabolic process;GO:0032012//regulation of ARF protein signal transduction	gi|13929158|ref|NP_114002.1|/0/ARF GTPase-activating protein GIT1 [Rattus norvegicus]
ENSRNOG00000003300	Btg2	-2.42564	0.859514	K14443|1|2e-77|291|rno:29619|protein Tob/BTG	-	GO:0000982//RNA polymerase II core promoter proximal region sequence-specific DNA binding transcription factor activity;GO:0005488//binding	GO:0009605//response to external stimulus;GO:0006357//regulation of transcription from RNA polymerase II promoter;GO:0031442//positive regulation of mRNA 3'-end processing;GO:0007612//learning;GO:0021766//hippocampus development;GO:0008213;GO:0006259//DNA metabolic process;GO:0008285//negative regulation of cell proliferation;GO:0003002//regionalization;GO:0021953//central nervous system neuron d…	gi|8393002|ref|NP_058955.1|/1.43375e-76/protein BTG2 precursor [Rattus norvegicus]
ENSRNOG00000016704	Pcyox1	3.24905	0.820101	K05906|1|0.0|971|rno:246302|prenylcysteine oxidase / farnesylcysteine lyase [EC:1.8.3.5 1.8.3.6]	GO:0034385;GO:0000323//lytic vacuole;GO:0016020//membrane	GO:0016670//oxidoreductase activity, acting on a sulfur group of donors, oxygen as acceptor;GO:0015662//ATPase activity, coupled to transmembrane movement of ions, phosphorylative mechanism	GO:0030329//prenylcysteine metabolic process;GO:0019941//modification-dependent protein catabolic process;GO:0009207;GO:0015698//inorganic anion transport	gi|21489987|ref|NP_659553.1|/0/prenylcysteine oxidase precursor [Rattus norvegicus]
ENSRNOG00000005130	Ogdh	-2.66498	0.869423	K00164|1|0.0|2075|rno:360975|2-oxoglutarate dehydrogenase E1 component [EC:1.2.4.2]	GO:0043234//protein complex;GO:0005740//mitochondrial envelope	GO:0019842//vitamin binding;GO:0034601;GO:0016624//oxidoreductase activity, acting on the aldehyde or oxo group of donors, disulfide as acceptor;GO:0005515//protein binding	GO:0006007//glucose catabolic process;GO:0043648//dicarboxylic acid metabolic process;GO:0006553//lysine metabolic process;GO:0009060//aerobic respiration;GO:0019674//NAD metabolic process	gi|60360580|dbj|BAD90530.1|/0/mKIAA4192 protein [Mus musculus]
ENSRNOG00000023150	Gpi	3.76197	0.900873	K01810|1|0.0|1140|rno:292804|glucose-6-phosphate isomerase [EC:5.3.1.9]	GO:0031981//nuclear lumen;GO:0016020//membrane;GO:0044421//extracellular region part;GO:0044444//cytoplasmic part	GO:0005102//receptor binding;GO:0016861//intramolecular oxidoreductase activity, interconverting aldoses and ketoses	GO:0006007//glucose catabolic process;GO:0006955//immune response;GO:0007610//behavior;GO:0009438//methylglyoxal metabolic process;GO:0050878//regulation of body fluid levels;GO:0048646//anatomical structure formation involved in morphogenesis;GO:0043066//negative regulation of apoptotic process;GO:0010466//negative regulation of peptidase activity	gi|46485440|ref|NP_997475.1|/0/glucose-6-phosphate isomerase [Rattus norvegicus]
ENSRNOG00000003712	Smek2	4.12659	0.857978	-	GO:0043231//intracellular membrane-bounded organelle;GO:0043232	-	GO:0006629//lipid metabolic process	gi|157821303|ref|NP_001101837.1|/0/serine/threonine-protein phosphatase 4 regulatory subunit 3B [Rattus norvegicus]
ENSRNOG00000011976	Nudt7	2.95551	0.82597	K01529|1|4e-15|82.8|mmu:66387|[EC:3.6.1.-]	GO:0042579//microbody	GO:0046914//transition metal ion binding;GO:0016817//hydrolase activity, acting on acid anhydrides;GO:0016289//CoA hydrolase activity	GO:0009117//nucleotide metabolic process;GO:0006084//acetyl-CoA metabolic process;GO:0009109;GO:0045444//fat cell differentiation	gi|149038257|gb|EDL92617.1|/7.02766e-136/nudix (nucleoside diphosphate linked moiety X)-type motif 7 (predicted), isoform CRA_d [Rattus norvegicus]
ENSRNOG00000000185	MPST	-2.09774	0.833817	K01011|1|8e-176|617|rno:192172|thiosulfate/3-mercaptopyruvate sulfurtransferase [EC:2.8.1.1 2.8.1.2]	GO:0019866//organelle inner membrane;GO:0043231//intracellular membrane-bounded organelle	GO:0016783//sulfurtransferase activity	GO:0015698//inorganic anion transport;GO:0009439//cyanate metabolic process;GO:0042221//response to chemical stimulus	gi|20304123|ref|NP_620198.1|/6.0929e-175/3-mercaptopyruvate sulfurtransferase [Rattus norvegicus]
ENSRNOG00000007234	CYP51A1	3.30273	0.84929	K05917|1|0.0|936|rno:25427|cytochrome P450, family 51 (sterol 14-demethylase) [EC:1.14.13.70]	GO:0031224//intrinsic to membrane;GO:0043231//intracellular membrane-bounded organelle;GO:0031090//organelle membrane	GO:0016709//oxidoreductase activity, acting on paired donors, with incorporation or reduction of molecular oxygen, NADH or NADPH as one donor, and incorporation of one atom of oxygen;GO:0016741;GO:0005506//iron ion binding	GO:0050810//regulation of steroid biosynthetic process;GO:0006730//one-carbon metabolic process;GO:0006695//cholesterol biosynthetic process	gi|6978751|ref|NP_037073.1|/0/lanosterol 14-alpha demethylase [Rattus norvegicus]
ENSRNOG00000016390	Eef1e1	3.60466	0.841485	K15439|1|3e-95|350|rno:291057|eukaryotic translation elongation factor 1 epsilon-1	GO:0043234//protein complex;GO:0031981//nuclear lumen;GO:0044444//cytoplasmic part	GO:0005488//binding	GO:0009967//positive regulation of signal transduction;GO:0006412//translation;GO:0006915//apoptotic process;GO:0006259//DNA metabolic process;GO:0007275//multicellular organismal development;GO:0008283//cell proliferation	gi|157816879|ref|NP_001099576.1|/2.49789e-94/eukaryotic translation elongation factor 1 epsilon-1 [Rattus norvegicus]
ENSRNOG00000016151	Ankrd23	3.44597	0.879605	K15503|1|3e-23|111|rno:301415|serine/threonine-protein phosphatase 6 regulatory ankyrin repeat subunit B	GO:0030017//sarcomere;GO:0043231//intracellular membrane-bounded organelle	-	GO:0032787//monocarboxylic acid metabolic process	gi|157817264|ref|NP_001101681.1|/2.28146e-154/ankyrin repeat domain-containing protein 23 [Rattus norvegicus]
ENSRNOG00000048812	Gpx1	3.52494	0.892164	K00432|1|2e-113|408|rno:24404|glutathione peroxidase [EC:1.11.1.9]	GO:0043231//intracellular membrane-bounded organelle;GO:0044444//cytoplasmic part	GO:0004601//peroxidase activity;GO:0016705//oxidoreductase activity, acting on paired donors, with incorporation or reduction of molecular oxygen;GO:0061135;GO:0042277//peptide binding;GO:0019904//protein domain specific binding	GO:0019725//cellular homeostasis;GO:0010468//regulation of gene expression;GO:0010466//negative regulation of peptidase activity;GO:0006639//acylglycerol metabolic process;GO:0002064//epithelial cell development;GO:0048871//multicellular organismal homeostasis;GO:0009608//response to symbiont;GO:0050954//sensory perception of mechanical stimulus;GO:0002437//inflammatory response to antigenic stim…	gi|145275165|ref|NP_110453.3|/1.80097e-112/glutathione peroxidase 1 [Rattus norvegicus]
ENSRNOG00000005362	Rab3ip	3.59118	0.868707	-	GO:0005815//microtubule organizing center;GO:0043231//intracellular membrane-bounded organelle	GO:0030695//GTPase regulator activity;GO:0019899//enzyme binding	GO:0006892//post-Golgi vesicle-mediated transport;GO:0019222//regulation of metabolic process;GO:0010927;GO:0034613//cellular protein localization	gi|120474981|ref|NP_059009.2|/0/rab-3A-interacting protein [Rattus norvegicus]
ENSRNOG00000013741	Ube2d3	2.31313	0.856958	K06689|1|2e-83|311|ssc:780418|ubiquitin-conjugating enzyme E2 D/E [EC:6.3.2.19]	GO:0043231//intracellular membrane-bounded organelle;GO:0031090//organelle membrane	GO:0019787//small conjugating protein ligase activity;GO:0032559	GO:0012501//programmed cell death;GO:0006511//ubiquitin-dependent protein catabolic process;GO:0006259//DNA metabolic process;GO:0000209//protein polyubiquitination;GO:0033554//cellular response to stress;GO:0001818//negative regulation of cytokine production;GO:0007178//transmembrane receptor protein serine/threonine kinase signaling pathway	gi|118403848|ref|NP_001072141.1|/1.2325e-82/ubiquitin-conjugating enzyme E2 D2 [Sus scrofa]
ENSRNOG00000020383	Dapk3	-2.75719	0.849953	K08803|1|0.0|696|rno:64391|death-associated protein kinase [EC:2.7.11.1]	GO:0044427//chromosomal part;GO:0005634//nucleus	GO:0004674//protein serine/threonine kinase activity;GO:0030275//LRR domain binding;GO:0032559	GO:0012502//induction of programmed cell death;GO:0035556//intracellular signal transduction;GO:0006796//phosphate-containing compound metabolic process;GO:0030154//cell differentiation;GO:0006325//chromatin organization;GO:0006464//cellular protein modification process	gi|410812207|ref|NP_001177403.2|/0/death-associated protein kinase 3 isoform a [Mus musculus]
ENSRNOG00000013493	Psma4	3.45321	0.887125	K02728|1|8e-124|444|tgu:100190079|20S proteasome subunit alpha 3 [EC:3.4.25.1]	GO:0043231//intracellular membrane-bounded organelle;GO:0005839//proteasome core complex	GO:0004175//endopeptidase activity;GO:0005515//protein binding	GO:0043161//proteasomal ubiquitin-dependent protein catabolic process;GO:0051320//S phase;GO:0007050//cell cycle arrest;GO:0016070//RNA metabolic process;GO:0051439//regulation of ubiquitin-protein ligase activity involved in mitotic cell cycle;GO:0006520//cellular amino acid metabolic process;GO:0006915//apoptotic process;GO:0030330//DNA damage response, signal transduction by p53 class mediator…	gi|449281518|gb|EMC88575.1|/6.25179e-123/Proteasome subunit alpha type-4 [Columba livia]
ENSRNOG00000001228	Pofut2	-2.37939	0.82089	K03691|1|0.0|866|rno:309686|peptide-O-fucosyltransferase [EC:2.4.1.221]	GO:0043231//intracellular membrane-bounded organelle	GO:0008417//fucosyltransferase activity	GO:0019318//hexose metabolic process	gi|164518932|ref|NP_001101091.2|/0/GDP-fucose protein O-fucosyltransferase 2 precursor [Rattus norvegicus]
ENSRNOG00000009795	Nfib	-2.10493	0.834101	K09169|1|0.0|911|aml:100477452|nuclear factor I/B	GO:0031981//nuclear lumen;GO:0031981//nuclear lumen;GO:0031981//nuclear lumen	GO:0001071//nucleic acid binding transcription factor activity;GO:0043566//structure-specific DNA binding;GO:0001071//nucleic acid binding transcription factor activity;GO:0043566//structure-specific DNA binding;GO:0001071//nucleic acid binding transcription factor activity;GO:0043566//structure-specific DNA binding	GO:0007606//sensory perception of chemical stimulus;GO:0030323//respiratory tube development;GO:0006259//DNA metabolic process;GO:0007420//brain development;GO:0008283//cell proliferation;GO:0007606//sensory perception of chemical stimulus;GO:0030323//respiratory tube development;GO:0006259//DNA metabolic process;GO:0007420//brain development;GO:0008283//cell proliferation;GO:0007606//sensory per…	gi|51972043|dbj|BAA25290.2|/0/NF1-B1 [Rattus norvegicus]
ENSRNOG00000013766	Acaa2	-2.6238	0.869117	K07508|1|0.0|749|rno:170465|acetyl-CoA acyltransferase 2 [EC:2.3.1.16]	GO:0019866//organelle inner membrane;GO:0044429//mitochondrial part	GO:0005488//binding;GO:0016408	GO:0009062//fatty acid catabolic process;GO:0006732//coenzyme metabolic process;GO:0043066//negative regulation of apoptotic process;GO:0008203//cholesterol metabolic process	gi|149027156|gb|EDL82880.1|/0/acetyl-Coenzyme A acyltransferase 2 (mitochondrial 3-oxoacyl-Coenzyme A thiolase), isoform CRA_f [Rattus norvegicus]
ENSRNOG00000027491	Vldlr	3.44052	0.844262	K12473|1|0.0|865|mdo:654363|low-density lipoprotein receptor	GO:0034385;GO:0043231//intracellular membrane-bounded organelle;GO:0031224//intrinsic to membrane;GO:0012505//endomembrane system;GO:0044444//cytoplasmic part	GO:0005515//protein binding;GO:0030295//protein kinase activator activity;GO:0030228//lipoprotein particle receptor activity;GO:0030169//low-density lipoprotein particle binding;GO:0046872//metal ion binding	GO:0032496//response to lipopolysaccharide;GO:0016125//sterol metabolic process;GO:0032868//response to insulin stimulus;GO:0007611//learning or memory;GO:0034381//plasma lipoprotein particle clearance;GO:0021543//pallium development;GO:0016192//vesicle-mediated transport;GO:0001666//response to hypoxia;GO:0007165//signal transduction;GO:0045860//positive regulation of protein kinase activity;GO:…	gi|293597511|ref|NP_037287.2|/0/very low-density lipoprotein receptor precursor [Rattus norvegicus]
ENSRNOG00000009628	Pfkm	3.94983	0.906332	K00850|1|0.0|1534|mmu:18642|6-phosphofructokinase [EC:2.7.1.11]	GO:0043234//protein complex;GO:0044459//plasma membrane part;GO:0044444//cytoplasmic part	GO:0032559;GO:0008443//phosphofructokinase activity;GO:0043169//cation binding;GO:0070061//fructose binding;GO:0019899//enzyme binding	GO:0006007//glucose catabolic process;GO:0006000//fructose metabolic process;GO:0016310//phosphorylation;GO:0050796//regulation of insulin secretion;GO:0019725//cellular homeostasis;GO:0051260//protein homooligomerization;GO:0042593//glucose homeostasis	gi|62825891|gb|AAH94212.1|/0/Phosphofructokinase, muscle [Rattus norvegicus]
ENSRNOG00000005916	Ppm1a	-2.76786	0.863932	K04457|1|0.0|794|ecb:100051348|protein phosphatase 1A (formerly 2C) [EC:3.1.3.16]	GO:0043231//intracellular membrane-bounded organelle;GO:0034704//calcium channel complex;GO:0042995//cell projection	GO:0046914//transition metal ion binding;GO:0060089;GO:0005515//protein binding;GO:0004721//phosphoprotein phosphatase activity	GO:0016055//Wnt receptor signaling pathway;GO:0006796//phosphate-containing compound metabolic process;GO:0006355//regulation of transcription, DNA-dependent;GO:0007249//I-kappaB kinase/NF-kappaB cascade;GO:0006464//cellular protein modification process	gi|338719774|ref|XP_003364061.1|/0/PREDICTED: protein phosphatase 1A-like isoform 2 [Equus caballus]
ENSRNOG00000001068	Rac1	3.73962	0.8929	K04392|1|7e-99|360|ssc:100627149|Ras-related C3 botulinum toxin substrate 1	GO:0030427//site of polarized growth;GO:0019898//extrinsic to membrane;GO:0031252//cell leading edge;GO:0005884//actin filament;GO:0012505//endomembrane system;GO:0048770;GO:0044297//cell body	GO:0019900//kinase binding;GO:0032561//guanyl ribonucleotide binding;GO:0017111//nucleoside-triphosphatase activity;GO:0005083//small GTPase regulator activity	GO:0021843;GO:0050688//regulation of defense response to virus;GO:0051641//cellular localization;GO:0001894//tissue homeostasis;GO:0009966//regulation of signal transduction;GO:0007169//transmembrane receptor protein tyrosine kinase signaling pathway;GO:0031175//neuron projection development;GO:0035567//non-canonical Wnt receptor signaling pathway;GO:0009207;GO:0006970//response to osmotic stress…	gi|147906150|ref|NP_001089332.1|/5.0421e-98/ras-related C3 botulinum toxin substrate 1 (rho family, small GTP binding protein Rac1) [Xenopus laevis]
ENSRNOG00000006302	Gclc	-2.51618	0.846366	K11204|1|0.0|1309|rno:25283|glutamate--cysteine ligase catalytic subunit [EC:6.3.2.2]	GO:0043234//protein complex;GO:0044444//cytoplasmic part	GO:0048037//cofactor binding;GO:0016597//amino acid binding;GO:0046983//protein dimerization activity;GO:0046872//metal ion binding;GO:0032559;GO:0016881//acid-amino acid ligase activity	GO:0003018;GO:0000096//sulfur amino acid metabolic process;GO:0006767//water-soluble vitamin metabolic process;GO:0003254//regulation of membrane depolarization;GO:0009064//glutamine family amino acid metabolic process;GO:0016567//protein ubiquitination;GO:0031331;GO:0010035//response to inorganic substance;GO:0006749//glutathione metabolic process;GO:0009719;GO:0006950//response to stress;GO:004…	gi|25742748|ref|NP_036947.1|/0/glutamate--cysteine ligase catalytic subunit [Rattus norvegicus]
ENSRNOG00000005291	Slc38a1	-2.86034	0.837962	K14990|1|0.0|848|rno:170567|solute carrier family 38 (sodium-coupled neutral amino acid transporter), member 1	GO:0031224//intrinsic to membrane;GO:0043005//neuron projection	GO:0015175//neutral amino acid transmembrane transporter activity;GO:0005343//organic acid:sodium symporter activity	GO:0015804//neutral amino acid transport;GO:0001505//regulation of neurotransmitter levels;GO:0006807//nitrogen compound metabolic process;GO:0030001//metal ion transport	gi|20301960|ref|NP_620187.1|/0/sodium-coupled neutral amino acid transporter 1 [Rattus norvegicus]
ENSRNOG00000033508	Mink1	3.74721	0.810582	K04413|1|0.0|2126|mmu:50932|misshapen/NIK-related kinase [EC:2.7.11.1]	GO:0044424//intracellular part	GO:0030695//GTPase regulator activity;GO:0004672//protein kinase activity;GO:0032559	GO:0043383//negative T cell selection;GO:0000165//MAPK cascade;GO:0019222//regulation of metabolic process;GO:0006796//phosphate-containing compound metabolic process;GO:0006464//cellular protein modification process	gi|353558926|sp|F1LP90.2|MINK1_RAT/0/RecName: Full=Misshapen-like kinase 1; AltName: Full=GCK family kinase MiNK; AltName: Full=MAPK/ERK kinase kinase kinase 6; Short=MEK kinase kinase 6; Short=MEKKK 6; AltName: Full=Misshapen/NIK-related kinase; AltName: Full=Mitogen-activated protein kinase kinase kinase kinase 6
ENSRNOG00000003330	Acsf2	2.57063	0.856916	K00666|1|0.0|1238|rno:619561|fatty-acyl-CoA synthase [EC:6.2.1.-]	GO:0043231//intracellular membrane-bounded organelle	GO:0003824//catalytic activity;GO:0032559	GO:0032787//monocarboxylic acid metabolic process;GO:0044238//primary metabolic process	gi|77993368|ref|NP_001030123.1|/0/acyl-CoA synthetase family member 2, mitochondrial precursor [Rattus norvegicus]
ENSRNOG00000024577	Gamt	2.84855	0.834627	K00542|1|2e-136|485|rno:25257|guanidinoacetate N-methyltransferase [EC:2.1.1.2]	GO:0044444//cytoplasmic part	GO:0042802//identical protein binding;GO:0008757//S-adenosylmethionine-dependent methyltransferase activity	GO:0006790//sulfur compound metabolic process;GO:0003012//muscle system process;GO:0035264//multicellular organism growth;GO:0006730//one-carbon metabolic process;GO:0048232//male gamete generation;GO:0006600//creatine metabolic process;GO:0009653//anatomical structure morphogenesis	gi|403310680|ref|NP_036925.2|/3.58727e-136/guanidinoacetate N-methyltransferase [Rattus norvegicus]
ENSRNOG00000001849	Mapk1	-2.13905	0.835921	K04371|1|0.0|687|rno:116590|extracellular signal-regulated kinase 1/2 [EC:2.7.11.24]	GO:0005856//cytoskeleton;GO:0031981//nuclear lumen;GO:0032991//macromolecular complex;GO:0030424//axon;GO:0030425//dendrite;GO:0044444//cytoplasmic part;GO:0043025//neuronal cell body	GO:0032559;GO:0045309//protein phosphorylated amino acid binding;GO:0004702//receptor signaling protein serine/threonine kinase activity;GO:0003676//nucleic acid binding;GO:0019901//protein kinase binding	GO:0001775//cell activation;GO:0006206//pyrimidine nucleobase metabolic process;GO:0050673//epithelial cell proliferation;GO:0007169//transmembrane receptor protein tyrosine kinase signaling pathway;GO:0050851//antigen receptor-mediated signaling pathway;GO:0043331//response to dsRNA;GO:0009653//anatomical structure morphogenesis;GO:0016477//cell migration;GO:0007600//sensory perception;GO:001250…	gi|148665020|gb|EDK97436.1|/0/mitogen activated protein kinase 1, isoform CRA_b [Mus musculus]
ENSRNOG00000007284	Slc2a1	3.92327	0.883023	K07299|1|0.0|899|rno:24778|MFS transporter, SP family, solute carrier family 2 (facilitated glucose transporter), member 1	GO:0030054//cell junction;GO:0016021//integral to membrane;GO:0045120//pronucleus;GO:0048770	GO:0005402//cation:sugar symporter activity;GO:0005355//glucose transmembrane transporter activity;GO:0051183//vitamin transporter activity;GO:0019899//enzyme binding	GO:0044238//primary metabolic process;GO:0009267//cellular response to starvation;GO:0006766//vitamin metabolic process;GO:0015758//glucose transport;GO:0030073//insulin secretion;GO:0015980//energy derivation by oxidation of organic compounds;GO:0051180//vitamin transport	gi|20301952|ref|NP_620182.1|/0/solute carrier family 2, facilitated glucose transporter member 1 [Rattus norvegicus]
ENSRNOG00000023520	Cs	3.66184	0.898591	K01647|1|0.0|912|rno:170587|citrate synthase [EC:2.3.3.1]	GO:0044429//mitochondrial part	GO:0046912//transferase activity, transferring acyl groups, acyl groups converted into alkyl on transfer	GO:0009060//aerobic respiration;GO:0005975//carbohydrate metabolic process;GO:0072350;GO:0006732//coenzyme metabolic process;GO:0043648//dicarboxylic acid metabolic process	gi|149029697|gb|EDL84868.1|/0/rCG42519, isoform CRA_a [Rattus norvegicus]
ENSRNOG00000008802	Dnajc11	3.86123	0.8712	K09531|1|0.0|1065|rno:362666|DnaJ homolog subfamily C member 11	GO:0019866//organelle inner membrane;GO:0043231//intracellular membrane-bounded organelle	GO:0005515//protein binding	GO:0044267//cellular protein metabolic process	gi|157822779|ref|NP_001102164.1|/0/dnaJ homolog subfamily C member 11 [Rattus norvegicus]
ENSRNOG00000012392	Dnajc2	-2.2392	0.841033	K09522|1|0.0|1004|rno:116456|DnaJ homolog subfamily C member 2	GO:0044444//cytoplasmic part;GO:0005635//nuclear envelope	GO:0031072//heat shock protein binding;GO:0003676//nucleic acid binding;GO:0032182//small conjugating protein binding	GO:0016049//cell growth;GO:0006259//DNA metabolic process;GO:0006355//regulation of transcription, DNA-dependent;GO:0051319;GO:0006325//chromatin organization;GO:0006458//'de novo' protein folding	gi|158138509|ref|NP_446228.2|/0/dnaJ homolog subfamily C member 2 [Rattus norvegicus]
ENSRNOG00000017188	Cyp27a1	3.38074	0.831019	K00488|1|0.0|1060|rno:301517|cytochrome P450, family 27, subfamily A (cholestanetriol 26-monooxygenase) [EC:1.14.13.15]	GO:0019866//organelle inner membrane;GO:0005740//mitochondrial envelope	GO:0016709//oxidoreductase activity, acting on paired donors, with incorporation or reduction of molecular oxygen, NADH or NADPH as one donor, and incorporation of one atom of oxygen;GO:0070643;GO:0005506//iron ion binding;GO:0008395//steroid hydroxylase activity	GO:0016125//sterol metabolic process;GO:0006694//steroid biosynthetic process;GO:0044237//cellular metabolic process	gi|149016121|gb|EDL75367.1|/0/rCG24013, isoform CRA_a [Rattus norvegicus]
ENSRNOG00000010633	Acsl1	-2.17636	0.854065	K01897|1|0.0|1385|rno:25288|long-chain acyl-CoA synthetase [EC:6.2.1.3]	GO:0031966//mitochondrial membrane;GO:0031224//intrinsic to membrane;GO:0044439	GO:0015645//fatty acid ligase activity;GO:0016405//CoA-ligase activity;GO:0032559	GO:0006869//lipid transport;GO:0035336//long-chain fatty-acyl-CoA metabolic process;GO:0070542//response to fatty acid;GO:0019221//cytokine-mediated signaling pathway;GO:0006805//xenobiotic metabolic process;GO:0045860//positive regulation of protein kinase activity;GO:0006641//triglyceride metabolic process;GO:0019217//regulation of fatty acid metabolic process;GO:0031667//response to nutrient l…	gi|25742739|ref|NP_036952.1|/0/long-chain-fatty-acid--CoA ligase 1 [Rattus norvegicus]
ENSRNOG00000008845	Pdrg1	3.6576	0.877101	-	GO:0044424//intracellular part;GO:0043234//protein complex	GO:0005515//protein binding	GO:0044267//cellular protein metabolic process	gi|62244083|ref|NP_001014762.1|/1.08353e-56/p53 and DNA damage-regulated protein 1 [Rattus norvegicus]
ENSRNOG00000004978	Prkacb	-2.67591	0.820301	K04345|1|0.0|694|rno:293508|protein kinase A [EC:2.7.11.11]	GO:0031981//nuclear lumen;GO:0016020//membrane;GO:0043234//protein complex;GO:0044444//cytoplasmic part;GO:0045202//synapse	GO:0051018//protein kinase A binding;GO:0004690//cyclic nucleotide-dependent protein kinase activity;GO:0046872//metal ion binding;GO:0032559;GO:0019900//kinase binding	GO:0015980//energy derivation by oxidation of organic compounds;GO:0007599//hemostasis;GO:0046824//positive regulation of nucleocytoplasmic transport;GO:0033762//response to glucagon stimulus;GO:0045786//negative regulation of cell cycle;GO:0032147//activation of protein kinase activity;GO:0010863//positive regulation of phospholipase C activity;GO:0007169//transmembrane receptor protein tyrosine…	gi|6755076|ref|NP_035230.1|/0/cAMP-dependent protein kinase catalytic subunit beta isoform 1 [Mus musculus]
ENSRNOG00000021206	Pla2g16	-2.09828	0.844273	K00678|1|2e-10|66.2|xtr:394746|phosphatidylcholine-retinol O-acyltransferase [EC:2.3.1.135]	GO:0031224//intrinsic to membrane;GO:0044444//cytoplasmic part	GO:0005488//binding;GO:0004091//carboxylesterase activity	GO:0006629//lipid metabolic process;GO:0051726//regulation of cell cycle	gi|433963|emb|CAA53991.1|/1.90097e-72/p18H-rev 107 [Rattus norvegicus]
ENSRNOG00000004829	Immp1l	2.63118	0.826402	K09647|1|7e-97|352|rno:687395|mitochondrial inner membrane protease subunit 1 [EC:3.4.21.-]	GO:0019866//organelle inner membrane;GO:0043231//intracellular membrane-bounded organelle	GO:0070011	GO:0019538//protein metabolic process	gi|149022834|gb|EDL79728.1|/4.73937e-96/rCG27139, isoform CRA_b [Rattus norvegicus]
ENSRNOG00000019213	Gpd1	3.06509	0.832208	K00006|1|0.0|703|rno:60666|glycerol-3-phosphate dehydrogenase (NAD+) [EC:1.1.1.8]	GO:0043231//intracellular membrane-bounded organelle;GO:0043234//protein complex;GO:0044444//cytoplasmic part	GO:0016901//oxidoreductase activity, acting on the CH-OH group of donors, quinone or similar compound as acceptor;GO:0016616//oxidoreductase activity, acting on the CH-OH group of donors, NAD or NADP as acceptor;GO:0042802//identical protein binding;GO:0000166//nucleotide binding;GO:0048037//cofactor binding	GO:0055114//oxidation-reduction process;GO:0006641//triglyceride metabolic process;GO:0006072//glycerol-3-phosphate metabolic process;GO:0019674//NAD metabolic process;GO:0006006//glucose metabolic process	gi|57527919|ref|NP_071551.2|/0/glycerol-3-phosphate dehydrogenase [NAD(+)], cytoplasmic [Rattus norvegicus]
ENSRNOG00000016794	Phyhd1	-2.6585	0.812096	K00477|1|1e-08|62.0|nvi:100118569|phytanoyl-CoA hydroxylase [EC:1.14.11.18]	-	GO:0016701//oxidoreductase activity, acting on single donors with incorporation of molecular oxygen;GO:0043169//cation binding	GO:0008152//metabolic process	gi|61556897|ref|NP_001013099.1|/7.12163e-171/phytanoyl-CoA dioxygenase domain-containing protein 1 [Rattus norvegicus]
ENSRNOG00000014516	Hs6st1	2.83611	0.822625	K02514|1|0.0|673|mmu:50785|heparan sulfate 6-O-sulfotransferase HS6ST1 [EC:2.8.2.-]	GO:0016021//integral to membrane	GO:0016782//transferase activity, transferring sulfur-containing groups	GO:0005975//carbohydrate metabolic process;GO:0048646//anatomical structure formation involved in morphogenesis;GO:0015012//heparan sulfate proteoglycan biosynthetic process;GO:0048568//embryonic organ development	gi|150421568|sp|Q91ZB4.3|H6ST1_CRIGR/0/RecName: Full=Heparan-sulfate 6-O-sulfotransferase 1; Short=HS6ST-1
ENSRNOG00000020115	Ilkap	-2.47761	0.828937	K01090|1|5e-32|139|tad:TRIADDRAFT_28894|protein phosphatase [EC:3.1.3.16];K04457|2|7e-32|139|cin:100183363|protein phosphatase 1A (formerly 2C) [EC:3.1.3.16];K14803|5|5e-30|132|ame:551020|protein phosphatase 2C homolog 2/3 [EC:3.1.3.16]	GO:0043234//protein complex;GO:0044424//intracellular part	GO:0043169//cation binding;GO:0004721//phosphoprotein phosphatase activity	GO:0000084//S phase of mitotic cell cycle;GO:0006464//cellular protein modification process;GO:0051726//regulation of cell cycle;GO:0006796//phosphate-containing compound metabolic process	gi|38541341|gb|AAH62010.1|/0/Integrin-linked kinase-associated serine/threonine phosphatase 2C [Rattus norvegicus]
ENSRNOG00000009745	PPP3CC	3.11818	0.84625	K04348|1|0.0|837|rno:171378|protein phosphatase 3, catalytic subunit [EC:3.1.3.16]	GO:0044444//cytoplasmic part	GO:0043169//cation binding;GO:0016791//phosphatase activity;GO:0005515//protein binding	GO:0007417//central nervous system development;GO:0006915//apoptotic process;GO:0006796//phosphate-containing compound metabolic process	gi|300119940|gb|ADJ67995.1|/0/protein phosphatase 3 catalytic subunit gamma transcript variant 1 [Rattus norvegicus]
ENSRNOG00000017752	Mccc2	3.56037	0.887493	K01969|1|0.0|1093|rno:361884|3-methylcrotonyl-CoA carboxylase beta subunit [EC:6.4.1.4]	GO:0019866//organelle inner membrane;GO:0044429//mitochondrial part	GO:0016421//CoA carboxylase activity;GO:0032559	GO:0006551//leucine metabolic process;GO:0006732//coenzyme metabolic process;GO:0009063//cellular amino acid catabolic process	gi|58865926|ref|NP_001012177.1|/0/methylcrotonoyl-CoA carboxylase beta chain, mitochondrial [Rattus norvegicus]
ENSRNOG00000012366	Mesdc2	-2.81922	0.830988	-	GO:0016020//membrane	GO:0070325//lipoprotein particle receptor binding	GO:0007166//cell surface receptor signaling pathway;GO:0009888//tissue development;GO:0044267//cellular protein metabolic process;GO:0034613//cellular protein localization	gi|56605768|ref|NP_001008346.1|/3.35297e-94/LDLR chaperone MESD precursor [Rattus norvegicus]
ENSRNOG00000009799	Dpagt1	3.52453	0.854129	K01001|1|0.0|694|rno:300668|UDP-N-acetylglucosamine--dolichyl-phosphate N-acetylglucosaminephosphotransferase [EC:2.7.8.15]	GO:0031227//intrinsic to endoplasmic reticulum membrane	GO:0016780//phosphotransferase activity, for other substituted phosphate groups	GO:0016094//polyprenol biosynthetic process;GO:0006461//protein complex assembly;GO:0006044//N-acetylglucosamine metabolic process;GO:0006487//protein N-linked glycosylation	gi|40786467|ref|NP_955420.1|/0/UDP-N-acetylglucosamine--dolichyl-phosphate N-acetylglucosaminephosphotransferase [Rattus norvegicus]
ENSRNOG00000019205	Gnpat	3.06314	0.858525	K00649|1|0.0|1303|rno:84470|glyceronephosphate O-acyltransferase [EC:2.3.1.42]	GO:0044439	GO:0005488//binding;GO:0016413//O-acetyltransferase activity	GO:0033993//response to lipid;GO:0008366//axon ensheathment;GO:0007043//cell-cell junction assembly;GO:0045017//glycerolipid biosynthetic process;GO:0031667//response to nutrient levels;GO:0032787//monocarboxylic acid metabolic process;GO:0009653//anatomical structure morphogenesis;GO:0006950//response to stress	gi|16758146|ref|NP_445862.1|/0/dihydroxyacetone phosphate acyltransferase [Rattus norvegicus]
ENSRNOG00000005157	Rbbp7	3.6625	0.891385	K11659|1|0.0|892|rno:83712|histone-binding protein RBBP7	GO:0000118//histone deacetylase complex;GO:0031519//PcG protein complex	GO:0005488//binding	GO:0010286//heat acclimation;GO:0006357//regulation of transcription from RNA polymerase II promoter;GO:0006259//DNA metabolic process;GO:0016049//cell growth;GO:0043486//histone exchange;GO:0032501//multicellular organismal process	gi|4506439|ref|NP_002884.1|/0/histone-binding protein RBBP7 isoform 2 [Homo sapiens]
ENSRNOG00000049152	Nme4	3.00933	0.821216	K00940|1|4e-106|384|rno:685679|nucleoside-diphosphate kinase [EC:2.7.4.6]	GO:0019866//organelle inner membrane;GO:0005740//mitochondrial envelope	GO:0043169//cation binding;GO:0016776//phosphotransferase activity, phosphate group as acceptor;GO:0032559	GO:0009209;GO:0006796//phosphate-containing compound metabolic process;GO:0009206;GO:0009132//nucleoside diphosphate metabolic process	gi|157823171|ref|NP_001102948.1|/2.97062e-105/nucleoside diphosphate kinase, mitochondrial [Rattus norvegicus]
ENSRNOG00000008543	Pdlim2	-4.202	0.844641	K03426|1|2e-07|57.8|ssc:100512459|NAD+ diphosphatase [EC:3.6.1.22];K05631|2|9e-07|55.8|acs:100559202|atrophin-1 interacting protein 3 (BAI1-associated protein 1);K06086|4|7e-06|52.8|tad:TRIADDRAFT_55897|sorbin and SH3 domain containing 1	GO:0005924//cell-substrate adherens junction;GO:0032432//actin filament bundle	GO:0051393//alpha-actinin binding;GO:0046914//transition metal ion binding;GO:0017022//myosin binding;GO:0031005//filamin binding	-	gi|56090295|ref|NP_001007623.1|/1.47478e-168/PDZ and LIM domain protein 2 [Rattus norvegicus]
ENSRNOG00000001239	Ddt	3.5874	0.892321	K10028|1|1e-61|236|rno:29318|D-dopachrome decarboxylase [EC:4.1.1.84]	GO:0044424//intracellular part	GO:0016831//carboxy-lyase activity;GO:0016863//intramolecular oxidoreductase activity, transposing C=C bonds;GO:0005488//binding	GO:0006582//melanin metabolic process;GO:0006952//defense response	gi|13162287|ref|NP_077045.1|/8.75967e-61/D-dopachrome decarboxylase [Rattus norvegicus]
ENSRNOG00000016272	Edf1	3.80014	0.900137	K03627|1|2e-80|298|cfa:480674|putative transcription factor	GO:0005667//transcription factor complex	GO:0003712//transcription cofactor activity;GO:0016741;GO:0004468//lysine N-acetyltransferase activity;GO:0001071//nucleic acid binding transcription factor activity;GO:0003677//DNA binding;GO:0005515//protein binding	GO:0006629//lipid metabolic process;GO:0051099//positive regulation of binding;GO:0032501//multicellular organismal process;GO:0030855//epithelial cell differentiation;GO:0006351//transcription, DNA-dependent	gi|10946942|ref|NP_067494.1|/7.35462e-78/endothelial differentiation-related factor 1 [Mus musculus]
ENSRNOG00000017777	Ahcy	-2.40308	0.83062	K01251|1|0.0|862|rno:29443|adenosylhomocysteinase [EC:3.3.1.1]	GO:0048770	GO:0016802;GO:0046914//transition metal ion binding;GO:0017076//purine nucleotide binding;GO:0005515//protein binding	GO:0042219//cellular modified amino acid catabolic process;GO:0002437//inflammatory response to antigenic stimulus;GO:0031667//response to nutrient levels;GO:0006730//one-carbon metabolic process;GO:0048512//circadian behavior	gi|8392878|ref|NP_058897.1|/0/adenosylhomocysteinase [Rattus norvegicus]
ENSRNOG00000014813	Prkag1	-2.73293	0.84807	K07200|1|4e-177|621|rno:25520|5'-AMP-activated protein kinase, regulatory gamma subunit	GO:0031981//nuclear lumen;GO:0043234//protein complex;GO:0044444//cytoplasmic part	GO:0004690//cyclic nucleotide-dependent protein kinase activity;GO:0032559;GO:0019887//protein kinase regulator activity;GO:0019900//kinase binding	GO:0033674//positive regulation of kinase activity;GO:0007169//transmembrane receptor protein tyrosine kinase signaling pathway;GO:0051259//protein oligomerization;GO:0006096//glycolysis;GO:0022402//cell cycle process;GO:0048232//male gamete generation;GO:0006464//cellular protein modification process;GO:0019217//regulation of fatty acid metabolic process	gi|1335860|gb|AAC52580.1|/3.44573e-176/5'-AMP-activated protein kinase, gamma-1 subunit, partial [Rattus norvegicus]
ENSRNOG00000046502	Lonp1	3.65532	0.886315	K08675|1|0.0|1735|rno:170916|Lon-like ATP-dependent protease [EC:3.4.21.-]	GO:0005759//mitochondrial matrix	GO:0004175//endopeptidase activity;GO:0032559;GO:0003723//RNA binding;GO:0042623//ATPase activity, coupled;GO:0043566//structure-specific DNA binding;GO:0019899//enzyme binding	GO:0000002//mitochondrial genome maintenance;GO:0051131//chaperone-mediated protein complex assembly;GO:0009207;GO:0051259//protein oligomerization;GO:0010038//response to metal ion;GO:0009719;GO:0019941//modification-dependent protein catabolic process;GO:0032502//developmental process;GO:0006979//response to oxidative stress	gi|19173766|ref|NP_596895.1|/0/lon protease homolog, mitochondrial precursor [Rattus norvegicus]
ENSRNOG00000020979	Psmb4	-2.4288	0.859283	K02736|1|1e-147|522|mmu:19172|20S proteasome subunit beta 7 [EC:3.4.25.1]	GO:0005815//microtubule organizing center;GO:0043231//intracellular membrane-bounded organelle;GO:0000502//proteasome complex	GO:0004175//endopeptidase activity;GO:0005488//binding	GO:0043161//proteasomal ubiquitin-dependent protein catabolic process;GO:0051320//S phase;GO:0002437//inflammatory response to antigenic stimulus;GO:0007050//cell cycle arrest;GO:0016070//RNA metabolic process;GO:0051439//regulation of ubiquitin-protein ligase activity involved in mitotic cell cycle;GO:0006520//cellular amino acid metabolic process;GO:0006915//apoptotic process;GO:0030330//DNA da…	gi|149030731|gb|EDL85768.1|/3.7724e-152/proteasome (prosome, macropain) subunit, beta type 4 [Rattus norvegicus]
ENSRNOG00000017532	Tesk1	3.03832	0.820048	K08841|1|0.0|983|rno:29460|testis-specific kinase 1 [EC:2.7.12.1]	GO:0044444//cytoplasmic part	GO:0043169//cation binding;GO:0004672//protein kinase activity;GO:0032559	GO:0006464//cellular protein modification process;GO:0034330;GO:0048232//male gamete generation;GO:0006796//phosphate-containing compound metabolic process	gi|13928784|ref|NP_113766.1|/0/dual specificity testis-specific protein kinase 1 [Rattus norvegicus]
ENSRNOG00000011667	Fastk	3.34955	0.872715	K08290|1|0.0|727|rno:296741|Fas-activated serine/threonine kinase [EC:2.7.11.8]	GO:0043231//intracellular membrane-bounded organelle	GO:0004674//protein serine/threonine kinase activity;GO:0032559	GO:0010468//regulation of gene expression;GO:0006464//cellular protein modification process;GO:0012501//programmed cell death;GO:0006796//phosphate-containing compound metabolic process	gi|58865504|ref|NP_001011967.1|/0/fas-activated serine/threonine kinase [Rattus norvegicus]
ENSRNOG00000001766	Tfrc	3.86638	0.836236	K06503|1|0.0|1528|rno:64678|transferrin receptor	GO:0031224//intrinsic to membrane;GO:0012505//endomembrane system;GO:0010008//endosome membrane;GO:0048770	GO:0031072//heat shock protein binding;GO:0022890//inorganic cation transmembrane transporter activity;GO:0004888//transmembrane signaling receptor activity;GO:0016787//hydrolase activity	GO:0016192//vesicle-mediated transport;GO:0010038//response to metal ion;GO:0002526//acute inflammatory response;GO:0023052//signaling;GO:0006875//cellular metal ion homeostasis;GO:0019538//protein metabolic process;GO:0033189//response to vitamin A;GO:0032502//developmental process;GO:0015031//protein transport	gi|281306746|ref|NP_073203.1|/0/transferrin receptor protein 1 [Rattus norvegicus]
ENSRNOG00000016509	Usp10	2.63602	0.822499	K11841|1|0.0|1511|rno:307905|ubiquitin carboxyl-terminal hydrolase 10 [EC:3.1.2.15]	GO:0005856//cytoskeleton;GO:0005768//endosome	GO:0016790//thiolester hydrolase activity;GO:0005515//protein binding;GO:0019783//small conjugating protein-specific protease activity	GO:0006259//DNA metabolic process;GO:0019941//modification-dependent protein catabolic process;GO:0042770//signal transduction in response to DNA damage;GO:0070646//protein modification by small protein removal	gi|77628029|ref|NP_001029318.1|/0/ubiquitin carboxyl-terminal hydrolase 10 [Rattus norvegicus]
ENSRNOG00000024336	Senp6	4.14543	0.889723	K08595|1|0.0|1956|mmu:215351|sentrin-specific protease 6 [EC:3.4.22.-]	GO:0031981//nuclear lumen	GO:0046914//transition metal ion binding;GO:0070011	GO:0019538//protein metabolic process	gi|348605217|ref|NP_001100312.2|/0/sentrin-specific protease 6 [Rattus norvegicus]
ENSRNOG00000013532	Pgam2	4.08339	0.914652	K01834|1|9e-147|519|rno:24959|2,3-bisphosphoglycerate-dependent phosphoglycerate mutase [EC:5.4.2.1]	GO:0043231//intracellular membrane-bounded organelle;GO:0044444//cytoplasmic part	GO:0005488//binding;GO:0004619//phosphoglycerate mutase activity;GO:0034416//bisphosphoglycerate phosphatase activity	GO:0006007//glucose catabolic process;GO:0010038//response to metal ion;GO:0006796//phosphate-containing compound metabolic process;GO:0048232//male gamete generation;GO:0006936//muscle contraction	gi|8393948|ref|NP_059024.1|/6.95457e-146/phosphoglycerate mutase 2 [Rattus norvegicus]
ENSRNOG00000010331	Ctsb	3.37351	0.886452	K01363|1|0.0|741|rno:64529|cathepsin B [EC:3.4.22.1]	GO:0000323//lytic vacuole;GO:0044459//plasma membrane part;GO:0009986//cell surface;GO:0048770;GO:0044421//extracellular region part	GO:0004175//endopeptidase activity;GO:0005515//protein binding	GO:0044248//cellular catabolic process;GO:0009725//response to hormone stimulus;GO:0010243//response to organic nitrogen;GO:0009746;GO:0019222//regulation of metabolic process;GO:0010941//regulation of cell death;GO:0019538//protein metabolic process;GO:0014706//striated muscle tissue development;GO:0034097//response to cytokine stimulus;GO:0006950//response to stress;GO:0009605//response to exte…	gi|82830420|ref|NP_072119.2|/0/cathepsin B preproprotein [Rattus norvegicus]
ENSRNOG00000010539	Mcat	-2.52362	0.808436	K00645|1|0.0|748|rno:315173|[acyl-carrier-protein] S-malonyltransferase [EC:2.3.1.39]	GO:0043231//intracellular membrane-bounded organelle	GO:0003824//catalytic activity	GO:0006631//fatty acid metabolic process	gi|300796456|ref|NP_001178717.1|/0/malonyl-CoA-acyl carrier protein transacylase, mitochondrial [Rattus norvegicus]
ENSRNOG00000009946	Ldlr	4.02107	0.858199	K12473|1|0.0|1766|rno:300438|low-density lipoprotein receptor	GO:0016021//integral to membrane;GO:0000323//lytic vacuole;GO:0009986//cell surface;GO:0034358//plasma lipoprotein particle;GO:0030665//clathrin-coated vesicle membrane;GO:0044459//plasma membrane part;GO:0010008//endosome membrane	GO:0030228//lipoprotein particle receptor activity;GO:0030169//low-density lipoprotein particle binding;GO:0046872//metal ion binding	GO:0016125//sterol metabolic process;GO:0034381//plasma lipoprotein particle clearance;GO:0043627//response to estrogen stimulus;GO:0042157//lipoprotein metabolic process;GO:0023052//signaling;GO:0043434//response to peptide hormone stimulus;GO:0030301//cholesterol transport;GO:0006897//endocytosis;GO:0032502//developmental process;GO:0055092//sterol homeostasis	gi|149020469|gb|EDL78274.1|/0/low density lipoprotein receptor, isoform CRA_a [Rattus norvegicus]
ENSRNOG00000012938	Psmb3	2.14517	0.847649	K02735|1|2e-113|409|rno:29676|20S proteasome subunit beta 3 [EC:3.4.25.1]	GO:0043231//intracellular membrane-bounded organelle;GO:0000502//proteasome complex	GO:0004175//endopeptidase activity;GO:0005488//binding	GO:0043161//proteasomal ubiquitin-dependent protein catabolic process;GO:0051320//S phase;GO:0007050//cell cycle arrest;GO:0016070//RNA metabolic process;GO:0051439//regulation of ubiquitin-protein ligase activity involved in mitotic cell cycle;GO:0006520//cellular amino acid metabolic process;GO:0006915//apoptotic process;GO:0030330//DNA damage response, signal transduction by p53 class mediator…	gi|8394082|ref|NP_058981.1|/1.31461e-112/proteasome subunit beta type-3 [Rattus norvegicus]
ENSRNOG00000018453	Nop2	3.15085	0.858978	K14835|1|0.0|1424|rno:314969|ribosomal RNA methyltransferase Nop2 [EC:2.1.1.-]	GO:0043231//intracellular membrane-bounded organelle	GO:0003676//nucleic acid binding;GO:0008168//methyltransferase activity	GO:0042254//ribosome biogenesis;GO:0006730//one-carbon metabolic process	gi|300796393|ref|NP_001178714.1|/0/putative ribosomal RNA methyltransferase NOP2 [Rattus norvegicus]
ENSRNOG00000020543	NOSIP	2.89816	0.843452	K13125|1|5e-173|607|rno:292894|nitric oxide synthase-interacting protein	GO:0044444//cytoplasmic part;GO:0043231//intracellular membrane-bounded organelle	GO:0005488//binding	GO:0006807//nitrogen compound metabolic process;GO:0032769//negative regulation of monooxygenase activity	gi|157820159|ref|NP_001099730.1|/4.11283e-172/nitric oxide synthase-interacting protein [Rattus norvegicus]
ENSRNOG00000001803	Dnajb11	4.02067	0.886515	K09517|1|0.0|684|rno:360734|DnaJ homolog subfamily B member 11	GO:0044432//endoplasmic reticulum part	GO:0005515//protein binding	GO:0044267//cellular protein metabolic process;GO:0009451//RNA modification	gi|397470100|ref|XP_003806671.1|/0/PREDICTED: dnaJ homolog subfamily B member 11 [Pan paniscus]
ENSRNOG00000014107	Omg	4.60146	0.8213	K06261|1|4e-11|70.5|ptr:468166|platelet glycoprotein Ib alpha chain;K08764|2|6e-11|70.1|gga:396550|sterol carrier protein 2 [EC:2.3.1.176];K10170|4|6e-11|70.1|mcc:574292|toll-like receptor 8	GO:0031224//intrinsic to membrane	GO:0042802//identical protein binding	GO:0031345//negative regulation of cell projection organization;GO:0007169//transmembrane receptor protein tyrosine kinase signaling pathway;GO:0031099;GO:0014003//oligodendrocyte development;GO:0048670	gi|226874871|ref|NP_001005898.3|/0/oligodendrocyte myelin glycoprotein precursor [Rattus norvegicus]
ENSRNOG00000050585	Pgam1	2.21284	0.851162	K01834|1|2e-138|493|mmu:18648|2,3-bisphosphoglycerate-dependent phosphoglycerate mutase [EC:5.4.2.1]	GO:0043231//intracellular membrane-bounded organelle;GO:0044444//cytoplasmic part	GO:0019900//kinase binding;GO:0016868//intramolecular transferase activity, phosphotransferases;GO:0034416//bisphosphoglycerate phosphatase activity	GO:0006796//phosphate-containing compound metabolic process;GO:0006096//glycolysis;GO:0006140	gi|403259801|ref|XP_003922386.1|/1.11396e-141/PREDICTED: phosphoglycerate mutase 1 [Saimiri boliviensis boliviensis]
ENSRNOG00000000186	Tst	-1.97628	0.837509	K01011|1|3e-175|615|rno:25274|thiosulfate/3-mercaptopyruvate sulfurtransferase [EC:2.8.1.1 2.8.1.2]	GO:0019866//organelle inner membrane;GO:0044429//mitochondrial part	GO:0016783//sulfurtransferase activity	GO:0015698//inorganic anion transport;GO:0031163;GO:0009439//cyanate metabolic process	gi|57528682|ref|NP_036940.1|/2.10619e-174/thiosulfate sulfurtransferase [Rattus norvegicus]
ENSRNOG00000019974	Uba52	4.56045	0.936447	K02927|1|6e-73|272|ptr:735674|large subunit ribosomal protein L40e	GO:0030529//ribonucleoprotein complex;GO:0030139//endocytic vesicle;GO:0031090//organelle membrane;GO:0031981//nuclear lumen	GO:0005198//structural molecule activity;GO:0005488//binding	GO:0031016//pancreas development;GO:0051091//positive regulation of sequence-specific DNA binding transcription factor activity;GO:0050851//antigen receptor-mediated signaling pathway;GO:0006259//DNA metabolic process;GO:0051320//S phase;GO:0030330//DNA damage response, signal transduction by p53 class mediator;GO:0043066//negative regulation of apoptotic process;GO:0007173//epidermal growth fact…	gi|13569612|gb|AAK31162.1|/8.69746e-74/ubiquitin A-52 residue ribosomal protein fusion product 1 [Homo sapiens]
ENSRNOG00000046253	-	-2.54066	0.85274	K08818|1|2e-56|219|mmu:12537|cell division cycle 2-like [EC:2.7.11.22]	GO:0044424//intracellular part	GO:0005488//binding;GO:0004672//protein kinase activity	GO:0050789//regulation of biological process;GO:0044238//primary metabolic process;GO:0044260;GO:0007067//mitosis	gi|386781773|ref|NP_665709.2|/2.45439e-56/cyclin-dependent kinase 11B [Rattus norvegicus]
ENSRNOG00000002389	Morf4l2	-2.93813	0.869391	K11342|1|6e-164|578|rno:317413|mortality factor 4-like protein 2	GO:0031981//nuclear lumen	GO:0005488//binding	GO:0016049//cell growth;GO:0006357//regulation of transcription from RNA polymerase II promoter;GO:0051149//positive regulation of muscle cell differentiation;GO:0006259//DNA metabolic process;GO:0033554//cellular response to stress;GO:0006325//chromatin organization	gi|56090315|ref|NP_001007715.1|/5.16093e-163/mortality factor 4-like protein 2 [Rattus norvegicus]
ENSRNOG00000003385	GLRX2	3.83262	0.849038	K03676|1|3e-63|243|rno:114022|glutaredoxin 3	GO:0031981//nuclear lumen;GO:0031981//nuclear lumen	GO:0043169//cation binding;GO:0051536//iron-sulfur cluster binding;GO:0015037//peptide disulfide oxidoreductase activity;GO:0030611//arsenate reductase activity;GO:0043169//cation binding;GO:0051536//iron-sulfur cluster binding;GO:0015037//peptide disulfide oxidoreductase activity;GO:0030611//arsenate reductase activity	GO:0012501//programmed cell death;GO:0048869//cellular developmental process;GO:0006259//DNA metabolic process;GO:0000302//response to reactive oxygen species;GO:0006457//protein folding;GO:0009628//response to abiotic stimulus;GO:0006790//sulfur compound metabolic process;GO:0006091//generation of precursor metabolites and energy;GO:0019725//cellular homeostasis;GO:0051234//establishment of loca…	gi|61556751|ref|NP_001013052.1|/2.84461e-66/glutaredoxin-2, mitochondrial [Rattus norvegicus]
ENSRNOG00000015866	Hint2	3.01147	0.86958	K02089|1|8e-43|173|ame:408406|cyclin-dependent kinase 4 [EC:2.7.11.22];K10863|2|1e-06|53.5|acs:100558032|aprataxin [EC:3.-.-.-]	GO:0043231//intracellular membrane-bounded organelle	GO:0003824//catalytic activity	GO:0012501//programmed cell death;GO:0008202//steroid metabolic process	gi|164565401|ref|NP_001101425.2|/3.63015e-87/histidine triad nucleotide binding protein 2 [Rattus norvegicus]
ENSRNOG00000019108	Rmi1	4.13293	0.867172	K10990|1|0.0|1152|rno:306734|RecQ-mediated genome instability protein 1	GO:0043231//intracellular membrane-bounded organelle	-	GO:0006259//DNA metabolic process	gi|293342595|ref|XP_001067170.2|/0/PREDICTED: recQ-mediated genome instability protein 1-like [Rattus norvegicus]
ENSRNOG00000003846	Pitpna	3.50386	0.876796	K01106|1|2e-126|453|gga:771549|inositol-1,4,5-trisphosphate 5-phosphatase [EC:3.1.3.56];K09441|2|2e-11|71.6|spu:591116|GA-binding protein transcription factor, alpha	GO:0031224//intrinsic to membrane;GO:0043231//intracellular membrane-bounded organelle;GO:0044444//cytoplasmic part	GO:0008289//lipid binding;GO:0005548//phospholipid transporter activity	GO:0044238//primary metabolic process;GO:0050953//sensory perception of light stimulus;GO:0006935//chemotaxis;GO:0006869//lipid transport	gi|74219964|dbj|BAE40562.1|/0/unnamed protein product [Mus musculus]
ENSRNOG00000047656	Gaa	-2.48166	0.853582	K12316|1|0.0|1898|rno:367562|lysosomal alpha-glucosidase [EC:3.2.1.20]	GO:0005764//lysosome	GO:0030246//carbohydrate binding;GO:0004558//alpha-glucosidase activity	GO:0003011//involuntary skeletal muscle contraction;GO:0008016//regulation of heart contraction;GO:0005984//disaccharide metabolic process;GO:0007033//vacuole organization;GO:0051651//maintenance of location in cell;GO:0005977//glycogen metabolic process;GO:0007610//behavior;GO:0055008//cardiac muscle tissue morphogenesis;GO:0019725//cellular homeostasis;GO:0019318//hexose metabolic process;GO:00…	gi|149054964|gb|EDM06781.1|/0/glucosidase, alpha, acid, isoform CRA_a [Rattus norvegicus]
ENSRNOG00000009325	Fuca1	2.92045	0.832544	K01206|1|0.0|962|rno:24375|alpha-L-fucosidase [EC:3.2.1.51]	GO:0000323//lytic vacuole	GO:0015928//fucosidase activity;GO:0030246//carbohydrate binding;GO:0043167//ion binding	GO:0006026;GO:0016139//glycoside catabolic process;GO:0019318//hexose metabolic process	gi|158186726|ref|NP_036694.2|/0/tissue alpha-L-fucosidase precursor [Rattus norvegicus]
ENSRNOG00000011164	Coq6	3.62673	0.864626	K06126|1|0.0|875|rno:299195|ubiquinone biosynthesis monooxygenase Coq6 [EC:1.14.13.-]	GO:0043231//intracellular membrane-bounded organelle	GO:0004497//monooxygenase activity;GO:0050662//coenzyme binding	GO:0006743//ubiquinone metabolic process	gi|58865534|ref|NP_001011983.1|/0/ubiquinone biosynthesis monooxygenase COQ6 precursor [Rattus norvegicus]
ENSRNOG00000018516	Impa2	3.59288	0.856211	K01092|1|3e-165|582|rno:282636|myo-inositol-1(or 4)-monophosphatase [EC:3.1.3.25]	GO:0044424//intracellular part	GO:0042802//identical protein binding;GO:0043169//cation binding	GO:0046838//phosphorylated carbohydrate dephosphorylation;GO:0019751//polyol metabolic process;GO:0023052//signaling	gi|74181837|dbj|BAE32621.1|/0/unnamed protein product [Mus musculus]
ENSRNOG00000014490	Bdh2	-2.74769	0.81257	K00019|1|5e-141|501|rno:295458|3-hydroxybutyrate dehydrogenase [EC:1.1.1.30]	GO:0043231//intracellular membrane-bounded organelle	GO:0016627//oxidoreductase activity, acting on the CH-CH group of donors;GO:0016616//oxidoreductase activity, acting on the CH-OH group of donors, NAD or NADP as acceptor;GO:0000166//nucleotide binding	GO:0006778//porphyrin-containing compound metabolic process;GO:0055080//cation homeostasis;GO:0009237//siderophore metabolic process;GO:0009062//fatty acid catabolic process	gi|157816997|ref|NP_001099943.1|/4.39742e-140/3-hydroxybutyrate dehydrogenase type 2 [Rattus norvegicus]
ENSRNOG00000010208	Timp1	-2.59456	0.847965	-	GO:0031091//platelet alpha granule;GO:0005578//proteinaceous extracellular matrix	GO:0043169//cation binding;GO:0004866//endopeptidase inhibitor activity	GO:0048469//cell maturation;GO:0009888//tissue development;GO:0009611//response to wounding;GO:0007599//hemostasis;GO:0008202//steroid metabolic process;GO:0008283//cell proliferation;GO:0006887//exocytosis;GO:0031330;GO:0006915//apoptotic process;GO:0001775//cell activation;GO:0009725//response to hormone stimulus;GO:0010466//negative regulation of peptidase activity	gi|16758666|ref|NP_446271.1|/1.07067e-110/metalloproteinase inhibitor 1 precursor [Rattus norvegicus]
ENSRNOG00000015020	Idh1	-1.64385	0.833281	K00031|1|0.0|800|rno:24479|isocitrate dehydrogenase [EC:1.1.1.42]	GO:0043231//intracellular membrane-bounded organelle;GO:0044444//cytoplasmic part	GO:0046872//metal ion binding;GO:0042802//identical protein binding;GO:0004448//isocitrate dehydrogenase activity;GO:0000166//nucleotide binding	GO:0006629//lipid metabolic process;GO:0009725//response to hormone stimulus;GO:0043648//dicarboxylic acid metabolic process;GO:0006790//sulfur compound metabolic process;GO:0044262//cellular carbohydrate metabolic process;GO:0009060//aerobic respiration;GO:0008406//gonad development;GO:0006950//response to stress	gi|13928690|ref|NP_113698.1|/0/isocitrate dehydrogenase [NADP] cytoplasmic [Rattus norvegicus]
ENSRNOG00000018898	Mpi	3.3464	0.836783	K01809|1|0.0|850|rno:300741|mannose-6-phosphate isomerase [EC:5.3.1.8]	GO:0044444//cytoplasmic part	GO:0046914//transition metal ion binding;GO:0016861//intramolecular oxidoreductase activity, interconverting aldoses and ketoses	GO:0009226//nucleotide-sugar biosynthetic process;GO:0006487//protein N-linked glycosylation;GO:0019318//hexose metabolic process	gi|51854221|ref|NP_001004081.1|/0/mannose-6-phosphate isomerase [Rattus norvegicus]
ENSRNOG00000016511	Pitrm1	3.67017	0.8789	K06972|1|0.0|1952|rno:307081|	GO:0044429//mitochondrial part	GO:0004175//endopeptidase activity;GO:0046914//transition metal ion binding;GO:0030234//enzyme regulator activity	GO:0019538//protein metabolic process	gi|157819139|ref|NP_001100833.1|/0/presequence protease, mitochondrial [Rattus norvegicus]
ENSRNOG00000002128	Ppat	3.6475	0.828716	K00764|1|0.0|1026|rno:117544|amidophosphoribosyltransferase [EC:2.4.2.14]	GO:0044444//cytoplasmic part	GO:0043169//cation binding;GO:0051536//iron-sulfur cluster binding;GO:0016763//transferase activity, transferring pentosyl groups	GO:0006144//purine nucleobase metabolic process;GO:0048609//multicellular organismal reproductive process;GO:0051260//protein homooligomerization;GO:0009064//glutamine family amino acid metabolic process;GO:0009127//purine nucleoside monophosphate biosynthetic process;GO:0009887//organ morphogenesis;GO:0007589//body fluid secretion;GO:0032868//response to insulin stimulus	gi|74195118|dbj|BAE28301.1|/0/unnamed protein product [Mus musculus]
ENSRNOG00000007753	Plaa	3.24235	0.858073	K14018|1|0.0|1620|rno:116645|phospholipase A-2-activating protein	-	GO:0016004//phospholipase activator activity	GO:0006952//defense response;GO:0023052//signaling;GO:0019637//organophosphate metabolic process	gi|149044496|gb|EDL97755.1|/0/phospholipase A2, activating protein, isoform CRA_a [Rattus norvegicus]
ENSRNOG00000010728	Stradb	4.02291	0.899011	K08271|1|7e-92|339|xtr:493513|protein kinase LYK5	GO:0043231//intracellular membrane-bounded organelle;GO:0044444//cytoplasmic part	GO:0016301//kinase activity;GO:0032559	GO:0032989;GO:0006605//protein targeting;GO:0007169//transmembrane receptor protein tyrosine kinase signaling pathway;GO:0006996//organelle organization;GO:0022402//cell cycle process;GO:0045860//positive regulation of protein kinase activity;GO:0019217//regulation of fatty acid metabolic process;GO:0043066//negative regulation of apoptotic process;GO:0000165//MAPK cascade	gi|167555101|ref|NP_001102777.2|/0/polyploidy associated protein kinase PAPK-A [Rattus norvegicus]
ENSRNOG00000000437	Agpat1	-2.66464	0.843904	K13509|1|6e-155|548|rno:406165|lysophosphatidate acyltransferase [EC:2.3.1.51]	GO:0043231//intracellular membrane-bounded organelle;GO:0031224//intrinsic to membrane	GO:0016411//acylglycerol O-acyltransferase activity	GO:0006644//phospholipid metabolic process;GO:0006641//triglyceride metabolic process;GO:0046394;GO:0001816//cytokine production	gi|149027956|gb|EDL83407.1|/1.24673e-155/1-acylglycerol-3-phosphate O-acyltransferase 1, isoform CRA_b [Rattus norvegicus]
ENSRNOG00000011728	Fto	-2.51117	0.811844	-	GO:0043231//intracellular membrane-bounded organelle	GO:0016706//oxidoreductase activity, acting on paired donors, with incorporation or reduction of molecular oxygen, 2-oxoglutarate as one donor, and incorporation of one atom each of oxygen into both donors;GO:0016701//oxidoreductase activity, acting on single donors with incorporation of molecular oxygen;GO:0005506//iron ion binding	GO:0009888//tissue development;GO:0035513;GO:0006281//DNA repair;GO:0043576//regulation of respiratory gaseous exchange;GO:0035511//oxidative DNA demethylation;GO:0035264//multicellular organism growth;GO:0070344;GO:0019915//lipid storage;GO:0048871//multicellular organismal homeostasis	gi|89337260|ref|NP_001034802.1|/0/alpha-ketoglutarate-dependent dioxygenase FTO [Rattus norvegicus]
ENSRNOG00000007990	Adipor2	3.06564	0.834659	K07297|1|0.0|822|rno:312670|adiponectin receptor	GO:0031224//intrinsic to membrane	GO:0004871//signal transducer activity;GO:0046983//protein dimerization activity	GO:0006631//fatty acid metabolic process;GO:0016049//cell growth;GO:0031667//response to nutrient levels;GO:0010828//positive regulation of glucose transport;GO:0048513//organ development;GO:0007165//signal transduction;GO:0022414//reproductive process	gi|149049603|gb|EDM02057.1|/0/rCG30257 [Rattus norvegicus]
ENSRNOG00000029207	Abcb4	2.41797	0.800042	K05659|1|0.0|2304|rno:24891|ATP-binding cassette, subfamily B (MDR/TAP), member 4	GO:0016021//integral to membrane;GO:0005911//cell-cell junction;GO:0012505//endomembrane system	GO:0042626//ATPase activity, coupled to transmembrane movement of substances;GO:0032559	GO:0015893//drug transport;GO:0006629//lipid metabolic process;GO:0009207;GO:0031960//response to corticosteroid stimulus	gi|149029021|gb|EDL84315.1|/0/rCG41087 [Rattus norvegicus]
ENSRNOG00000028225	Tnni3k	3.63529	0.876154	K10380|1|1e-39|166|tsp:Tsp_02713|ankyrin	GO:0043231//intracellular membrane-bounded organelle	GO:0043169//cation binding;GO:0008092//cytoskeletal protein binding;GO:0004672//protein kinase activity;GO:0032559	GO:0006464//cellular protein modification process;GO:0006796//phosphate-containing compound metabolic process	gi|32401467|ref|NP_861434.1|/0/serine/threonine-protein kinase TNNI3K [Rattus norvegicus]
ENSRNOG00000020533	Htra1	-2.10283	0.807268	K08784|1|0.0|913|rno:65164|HtrA serine peptidase 1 [EC:3.4.21.-]	GO:0044421//extracellular region part	GO:0004175//endopeptidase activity;GO:0019838//growth factor binding	GO:0019538//protein metabolic process;GO:0016049//cell growth;GO:0030509//BMP signaling pathway;GO:0007179//transforming growth factor beta receptor signaling pathway	gi|13929012|ref|NP_113909.1|/0/serine protease HTRA1 precursor [Rattus norvegicus]
ENSRNOG00000020642	Flad1	3.36524	0.863122	K00953|1|0.0|996|rno:751787|FAD synthetase [EC:2.7.7.2]	GO:0044444//cytoplasmic part	GO:0070566//adenylyltransferase activity;GO:0032559	GO:0006766//vitamin metabolic process;GO:0009108//coenzyme biosynthetic process;GO:0046443//FAD metabolic process	gi|148683252|gb|EDL15199.1|/0/RFad1, flavin adenine dinucleotide synthetase, homolog (yeast), isoform CRA_b [Mus musculus]
ENSRNOG00000001385	Plbd2	4.09302	0.891154	-	GO:0005764//lysosome	GO:0003824//catalytic activity	GO:0006629//lipid metabolic process	gi|158341628|ref|NP_640348.2|/0/putative phospholipase B-like 2 precursor [Rattus norvegicus]
ENSRNOG00000002778	Aatf	-2.43509	0.839129	K14782|1|0.0|696|rno:114512|protein AATF/BFR2	GO:0031981//nuclear lumen;GO:0005815//microtubule organizing center;GO:0005924//cell-substrate adherens junction	GO:0030275//LRR domain binding;GO:0001071//nucleic acid binding transcription factor activity;GO:0008092//cytoskeletal protein binding	GO:0000278//mitotic cell cycle;GO:0006357//regulation of transcription from RNA polymerase II promoter;GO:0022613//ribonucleoprotein complex biogenesis;GO:0007169//transmembrane receptor protein tyrosine kinase signaling pathway;GO:0010561;GO:0006917//induction of apoptosis;GO:0009790//embryo development;GO:2000378//negative regulation of reactive oxygen species metabolic process;GO:0033554//cell…	gi|16758536|ref|NP_446172.1|/0/protein AATF [Rattus norvegicus]
ENSRNOG00000011146	Gyg1	3.85343	0.903208	K00750|1|0.0|652|rno:81675|glycogenin glucosyltransferase [EC:2.4.1.186]	GO:0044444//cytoplasmic part	GO:0048029//monosaccharide binding;GO:0043169//cation binding;GO:0035251//UDP-glucosyltransferase activity	GO:0005977//glycogen metabolic process;GO:0019318//hexose metabolic process	gi|13591969|ref|NP_112305.1|/0/glycogenin-1 [Rattus norvegicus]
ENSRNOG00000015145	Ppp6c	3.35572	0.863658	K15498|1|0.0|646|dre:393980|serine/threonine-protein phosphatase 6 catalytic subunit [EC:3.1.3.16]	GO:0044444//cytoplasmic part	GO:0043169//cation binding;GO:0004721//phosphoprotein phosphatase activity	GO:0006464//cellular protein modification process;GO:0006796//phosphate-containing compound metabolic process;GO:0022402//cell cycle process	gi|21312758|ref|NP_077171.1|/0/serine/threonine-protein phosphatase 6 catalytic subunit [Mus musculus]
ENSRNOG00000014064	Ctsh	4.19318	0.905996	K01366|1|0.0|667|rno:25425|cathepsin H [EC:3.4.22.16]	GO:0000323//lytic vacuole	GO:0004175//endopeptidase activity;GO:0005515//protein binding	GO:0010631//epithelial cell migration;GO:0019538//protein metabolic process;GO:0031647//regulation of protein stability;GO:0033189//response to vitamin A;GO:0060600	gi|6978721|ref|NP_037071.1|/0/pro-cathepsin H precursor [Rattus norvegicus]
ENSRNOG00000026119	Ywhah	2.98294	0.871631	K06630|1|5e-136|485|ssc:100155504|tyrosine 3-monooxygenase/tryptophan 5-monooxygenase activation protein	GO:0044424//intracellular part	GO:0016491//oxidoreductase activity;GO:0008092//cytoskeletal protein binding;GO:0035258//steroid hormone receptor binding	GO:0006584//catecholamine metabolic process;GO:0015031//protein transport;GO:0050767//regulation of neurogenesis;GO:0007067//mitosis;GO:0006915//apoptotic process;GO:0008208;GO:0050804//regulation of synaptic transmission;GO:0031345//negative regulation of cell projection organization;GO:0031958	gi|6756037|ref|NP_035868.1|/4.25398e-135/14-3-3 protein eta [Mus musculus]
ENSRNOG00000021090	Pygm	3.88413	0.906942	K00688|1|0.0|1663|rno:24701|starch phosphorylase [EC:2.4.1.1]	GO:0031674//I band;GO:0005783//endoplasmic reticulum	GO:0042802//identical protein binding;GO:0004645//phosphorylase activity;GO:0030246//carbohydrate binding;GO:0048037//cofactor binding;GO:0032559	GO:0006875//cellular metal ion homeostasis;GO:0005977//glycogen metabolic process;GO:0006950//response to stress;GO:0010033//response to organic substance	gi|158138498|ref|NP_036770.1|/0/glycogen phosphorylase, muscle form [Rattus norvegicus]
ENSRNOG00000046366	DMD	3.73606	0.875092	K10366|1|0.0|1078|acs:100557883|dystrophin	GO:0043234//protein complex;GO:0005886//plasma membrane;GO:0030016//myofibril	GO:0001948//glycoprotein binding;GO:0046914//transition metal ion binding;GO:0008092//cytoskeletal protein binding;GO:0019899//enzyme binding;GO:0005198//structural molecule activity	GO:0006936//muscle contraction;GO:0006518//peptide metabolic process;GO:0048513//organ development	gi|52630316|ref|NP_001005244.1|/0/dystrophin isoform Dp71ab [Rattus norvegicus]
ENSRNOG00000009289	Galk2	3.76763	0.862017	K00849|1|0.0|879|rno:296117|galactokinase [EC:2.7.1.6]	GO:0044424//intracellular part	GO:0016773//phosphotransferase activity, alcohol group as acceptor;GO:0032559	GO:0016310//phosphorylation;GO:0019318//hexose metabolic process	gi|62078569|ref|NP_001013941.1|/0/N-acetylgalactosamine kinase [Rattus norvegicus]
ENSRNOG00000005487	Chpt1	-2.47781	0.856884	K00994|1|0.0|733|rno:362866|diacylglycerol cholinephosphotransferase [EC:2.7.8.2]	GO:0031224//intrinsic to membrane;GO:0043231//intracellular membrane-bounded organelle;GO:0012505//endomembrane system	GO:0043169//cation binding;GO:0017169//CDP-alcohol phosphatidyltransferase activity;GO:0008289//lipid binding	GO:0016049//cell growth;GO:0006656//phosphatidylcholine biosynthetic process;GO:0046469//platelet activating factor metabolic process	gi|56090323|ref|NP_001007751.1|/0/cholinephosphotransferase 1 [Rattus norvegicus]
ENSRNOG00000004693	Pbx1	-2.39806	0.808962	K09355|1|0.0|738|ecb:100058426|pre-B-cell leukemia transcription factor 1	GO:0031981//nuclear lumen;GO:0043234//protein complex;GO:0031981//nuclear lumen;GO:0043234//protein complex	GO:0001071//nucleic acid binding transcription factor activity;GO:0046983//protein dimerization activity;GO:0003677//DNA binding;GO:0001071//nucleic acid binding transcription factor activity;GO:0046983//protein dimerization activity;GO:0003677//DNA binding	GO:0001501//skeletal system development;GO:0030097//hemopoiesis;GO:0045596//negative regulation of cell differentiation;GO:0008202//steroid metabolic process;GO:0006357//regulation of transcription from RNA polymerase II promoter;GO:0003006//developmental process involved in reproduction;GO:0008283//cell proliferation;GO:0035108//limb morphogenesis;GO:0001503//ossification;GO:0043392//negative re…	gi|338724769|ref|XP_003365012.1|/5.41694e-179/PREDICTED: pre-B-cell leukemia transcription factor 1 isoform 2 [Equus caballus]
ENSRNOG00000013111	Mettl3	-2.1227	0.814915	K05925|1|0.0|1085|rno:361035|mRNA (2'-O-methyladenosine-N6-)-methyltransferase [EC:2.1.1.62]	GO:0016604//nuclear body	GO:0003676//nucleic acid binding;GO:0008174//mRNA methyltransferase activity	GO:0006730//one-carbon metabolic process;GO:0009451//RNA modification	gi|67078430|ref|NP_001019965.1|/0/N6-adenosine-methyltransferase 70 kDa subunit [Rattus norvegicus]
ENSRNOG00000016064	Tkt	3.56845	0.871558	K00615|1|0.0|1274|rno:64524|transketolase [EC:2.2.1.1]	GO:0042579//microbody;GO:0031090//organelle membrane	GO:0019842//vitamin binding;GO:0046872//metal ion binding;GO:0016744	GO:0005997//xylulose metabolic process;GO:0050789//regulation of biological process;GO:0006098//pentose-phosphate shunt;GO:0015980//energy derivation by oxidation of organic compounds;GO:0019302	gi|149034221|gb|EDL88991.1|/0/transketolase, isoform CRA_a [Rattus norvegicus]
ENSRNOG00000012616	Ppt1	3.13987	0.814358	K01074|1|4e-169|595|rno:29411|palmitoyl-protein thioesterase [EC:3.1.2.22]	GO:0043005//neuron projection;GO:0044297//cell body;GO:0000323//lytic vacuole;GO:0044425//membrane part;GO:0044421//extracellular region part;GO:0030136//clathrin-coated vesicle	-	GO:0000737//DNA catabolic process, endonucleolytic;GO:0007626//locomotory behavior;GO:0007417//central nervous system development;GO:0007612//learning;GO:0006665//sphingolipid metabolic process;GO:0050953//sensory perception of light stimulus;GO:0048468//cell development;GO:0035601//protein deacylation;GO:0030163//protein catabolic process;GO:0050804//regulation of synaptic transmission;GO:000150…	gi|11968070|ref|NP_071947.1|/3.13205e-168/palmitoyl-protein thioesterase 1 precursor [Rattus norvegicus]
ENSRNOG00000008195	YWHAZ	-2.48589	0.855601	K06630|1|3e-137|489|aml:100484483|tyrosine 3-monooxygenase/tryptophan 5-monooxygenase activation protein	GO:0032991//macromolecular complex;GO:0044430//cytoskeletal part;GO:0048770	GO:0005515//protein binding	GO:0042221//response to chemical stimulus;GO:0007599//hemostasis;GO:0006605//protein targeting;GO:0016070//RNA metabolic process;GO:0002441;GO:0001775//cell activation;GO:0043066//negative regulation of apoptotic process	gi|301756356|ref|XP_002914041.1|/2.59097e-136/PREDICTED: 14-3-3 protein zeta/delta-like [Ailuropoda melanoleuca]
ENSRNOG00000020288	Slc25a20	2.8712	0.862175	K15109|1|4e-165|582|rno:117035|solute carrier family 25 (mitochondrial carnitine/acylcarnitine transporter), member 20/29	GO:0031224//intrinsic to membrane;GO:0043231//intracellular membrane-bounded organelle;GO:0019866//organelle inner membrane	GO:0022891//substrate-specific transmembrane transporter activity	GO:0051181//cofactor transport;GO:0003333//amino acid transmembrane transport;GO:0019217//regulation of fatty acid metabolic process	gi|52138624|ref|NP_446417.2|/3.44773e-164/mitochondrial carnitine/acylcarnitine carrier protein [Rattus norvegicus]
ENSRNOG00000014109	Psmd13	3.75206	0.884433	K03039|1|0.0|735|rno:365388|26S proteasome regulatory subunit N9	GO:0022624//proteasome accessory complex	GO:0005488//binding	GO:0043161//proteasomal ubiquitin-dependent protein catabolic process;GO:0051320//S phase;GO:0007050//cell cycle arrest;GO:0016070//RNA metabolic process;GO:0051439//regulation of ubiquitin-protein ligase activity involved in mitotic cell cycle;GO:0006520//cellular amino acid metabolic process;GO:0006915//apoptotic process;GO:0007126//meiosis;GO:0030330//DNA damage response, signal transduction b…	gi|157821581|ref|NP_001102395.1|/0/26S proteasome non-ATPase regulatory subunit 13 [Rattus norvegicus]
ENSRNOG00000030124	Ptpn11	2.73269	0.846555	K07293|1|0.0|1159|rno:25622|protein tyrosine phosphatase, non-receptor type 11 [EC:3.1.3.48]	GO:0032991//macromolecular complex;GO:0032432//actin filament bundle;GO:0043231//intracellular membrane-bounded organelle;GO:0044459//plasma membrane part;GO:0044444//cytoplasmic part	GO:0051427;GO:0004725//protein tyrosine phosphatase activity;GO:0019899//enzyme binding	GO:0006639//acylglycerol metabolic process;GO:0006470//protein dephosphorylation;GO:0007169//transmembrane receptor protein tyrosine kinase signaling pathway;GO:0035264//multicellular organism growth;GO:0060123//regulation of growth hormone secretion;GO:0046888//negative regulation of hormone secretion;GO:0022414//reproductive process;GO:0006935//chemotaxis;GO:0006974//response to DNA damage stim…	gi|294862237|ref|NP_037220.2|/0/tyrosine-protein phosphatase non-receptor type 11 isoform 2 [Rattus norvegicus]
ENSRNOG00000005828	Skp1	-2.17731	0.857316	K03094|1|2e-69|263|rno:287280|S-phase kinase-associated protein 1	GO:0031981//nuclear lumen;GO:0031461//cullin-RING ubiquitin ligase complex;GO:0044444//cytoplasmic part	GO:0016772//transferase activity, transferring phosphorus-containing groups;GO:0005488//binding;GO:0004091//carboxylesterase activity;GO:0019787//small conjugating protein ligase activity	GO:0043161//proteasomal ubiquitin-dependent protein catabolic process;GO:0051439//regulation of ubiquitin-protein ligase activity involved in mitotic cell cycle;GO:0006796//phosphate-containing compound metabolic process;GO:0051320//S phase	gi|74177667|dbj|BAE38934.1|/1.86394e-68/unnamed protein product [Mus musculus]
ENSRNOG00000012683	Abhd17c	-2.34154	0.817198	K06889|1|7e-13|76.6|nve:NEMVE_v1g227226|	-	GO:0070011	GO:0019538//protein metabolic process	gi|158186616|ref|NP_598483.2|/1.82711e-157/abhydrolase domain-containing protein FAM108C1 [Mus musculus]
ENSRNOG00000017619	Aldh1a1	2.68988	0.849406	K00128|1|0.0|986|rno:24188|aldehyde dehydrogenase (NAD+) [EC:1.2.1.3];K07249|3|0.0|909|mmu:26358|retinal dehydrogenase [EC:1.2.1.36]	GO:0044444//cytoplasmic part	GO:0019115//benzaldehyde dehydrogenase activity;GO:0004030//aldehyde dehydrogenase [NAD(P)+] activity;GO:0005515//protein binding	GO:0048562//embryonic organ morphogenesis;GO:0033189//response to vitamin A;GO:0007612//learning;GO:0043627//response to estrogen stimulus;GO:0022602//ovulation cycle process;GO:0006915//apoptotic process;GO:0035238//vitamin A biosynthetic process;GO:0048565//digestive tract development;GO:0016331//morphogenesis of embryonic epithelium;GO:0006950//response to stress;GO:0051260//protein homooligom…	gi|28386049|gb|AAH44729.1|/0/Aldh1a1 protein [Mus musculus]
ENSRNOG00000005358	Pmm1	3.85743	0.867056	K01840|1|6e-144|511|rno:300089|phosphomannomutase [EC:5.4.2.8]	GO:0044444//cytoplasmic part;GO:0044297//cell body	GO:0043169//cation binding;GO:0016868//intramolecular transferase activity, phosphotransferases	GO:0009226//nucleotide-sugar biosynthetic process;GO:0006013//mannose metabolic process;GO:0006487//protein N-linked glycosylation	gi|56605724|ref|NP_001008324.1|/4.45459e-143/phosphomannomutase 1 [Rattus norvegicus]
ENSRNOG00000007390	Nfkbia	3.43943	0.88073	K04734|1|7e-172|604|rno:25493|NF-kappa-B inhibitor alpha	GO:0016020//membrane;GO:0043231//intracellular membrane-bounded organelle;GO:0043234//protein complex;GO:0044444//cytoplasmic part	GO:0019899//enzyme binding;GO:0005048//signal sequence binding;GO:0008134//transcription factor binding	GO:0031325//positive regulation of cellular metabolic process;GO:0045596//negative regulation of cell differentiation;GO:0010742//macrophage derived foam cell differentiation;GO:0042994//cytoplasmic sequestering of transcription factor;GO:0008283//cell proliferation;GO:0002224//toll-like receptor signaling pathway;GO:0043433//negative regulation of sequence-specific DNA binding transcription fact…	gi|148704779|gb|EDL36726.1|/4.43102e-176/nuclear factor of kappa light chain gene enhancer in B-cells inhibitor, alpha [Mus musculus]
ENSRNOG00000016327	Mcee	2.54472	0.831345	K05606|1|2e-89|329|rno:293829|methylmalonyl-CoA/ethylmalonyl-CoA epimerase [EC:5.1.99.1]	GO:0044429//mitochondrial part	GO:0016854//racemase and epimerase activity	GO:0009062//fatty acid catabolic process;GO:0006732//coenzyme metabolic process	gi|157821869|ref|NP_001099811.1|/1.25409e-88/methylmalonyl-CoA epimerase, mitochondrial [Rattus norvegicus]
ENSRNOG00000021440	Pptc7	-2.7659	0.831124	-	GO:0043231//intracellular membrane-bounded organelle	GO:0016791//phosphatase activity;GO:0043169//cation binding	GO:0006796//phosphate-containing compound metabolic process	gi|157820437|ref|NP_001100611.1|/3.48245e-158/protein phosphatase PTC7 homolog [Rattus norvegicus]
ENSRNOG00000023363	Ing4	-2.58104	0.836783	K11346|1|4e-135|482|rno:297597|inhibitor of growth protein 4	GO:0043231//intracellular membrane-bounded organelle;GO:0043234//protein complex	GO:0046914//transition metal ion binding;GO:0003712//transcription cofactor activity	GO:0043967//histone H4 acetylation;GO:0006355//regulation of transcription, DNA-dependent;GO:0008283//cell proliferation;GO:0006259//DNA metabolic process;GO:0040008//regulation of growth;GO:0022402//cell cycle process;GO:0006915//apoptotic process;GO:0030330//DNA damage response, signal transduction by p53 class mediator	gi|120586981|ref|NP_001073356.1|/3.25943e-134/inhibitor of growth protein 4 [Rattus norvegicus]
ENSRNOG00000037284	Idh3g	3.03609	0.878248	K00030|1|0.0|654|rno:25179|isocitrate dehydrogenase (NAD+) [EC:1.1.1.41]	GO:0031981//nuclear lumen;GO:0030062//mitochondrial tricarboxylic acid cycle enzyme complex	GO:0046872//metal ion binding;GO:0004448//isocitrate dehydrogenase activity;GO:0032559	GO:0040008//regulation of growth;GO:0043648//dicarboxylic acid metabolic process;GO:0009060//aerobic respiration;GO:0019674//NAD metabolic process	gi|54020666|ref|NP_113739.1|/0/isocitrate dehydrogenase [NAD] subunit gamma 1, mitochondrial precursor [Rattus norvegicus]
ENSRNOG00000017820	Nqo2	3.56365	0.872105	K08071|1|2e-134|479|rno:291084|ribosyldihydronicotinamide dehydrogenase (quinone) [EC:1.10.99.2]	GO:0031981//nuclear lumen	GO:0043169//cation binding;GO:0016491//oxidoreductase activity;GO:0048037//cofactor binding	GO:0008152//metabolic process;GO:0007611//learning or memory	gi|51948400|ref|NP_001004214.1|/1.89016e-133/ribosyldihydronicotinamide dehydrogenase [quinone] [Rattus norvegicus]
ENSRNOG00000049819	RGD1560220	2.40319	0.808068	K09539|1|4e-87|323|rno:502525|DnaJ homolog subfamily C member 19	GO:0031224//intrinsic to membrane;GO:0043231//intracellular membrane-bounded organelle;GO:0019866//organelle inner membrane	GO:0005515//protein binding	GO:0044267//cellular protein metabolic process;GO:0050953//sensory perception of light stimulus;GO:0006605//protein targeting;GO:0003006//developmental process involved in reproduction	gi|197381799|ref|NP_001128112.1|/3.15717e-86/uncharacterized protein LOC502525 [Rattus norvegicus]
ENSRNOG00000015202	Dnajc5	3.89619	0.878858	K09525|1|2e-94|345|rno:79130|DnaJ homolog subfamily C member 5	GO:0030665//clathrin-coated vesicle membrane;GO:0048770	GO:0005515//protein binding	GO:0044267//cellular protein metabolic process;GO:0001505//regulation of neurotransmitter levels;GO:0043066//negative regulation of apoptotic process	gi|15126683|gb|AAH12268.1|/2.61549e-94/Dnajc5 protein [Mus musculus]
ENSRNOG00000016133	Sumo1	4.09262	0.905512	K12160|1|2e-52|206|ssc:100127139|small ubiquitin-related modifier	GO:0043005//neuron projection;GO:0016604//nuclear body;GO:0005635//nuclear envelope	GO:0019787//small conjugating protein ligase activity;GO:0019899//enzyme binding	GO:0006351//transcription, DNA-dependent;GO:0006461//protein complex assembly;GO:0001959//regulation of cytokine-mediated signaling pathway;GO:0006259//DNA metabolic process;GO:0043392//negative regulation of DNA binding;GO:0008104//protein localization;GO:0031331;GO:0032446//protein modification by small protein conjugation	gi|159162028|pdb|1A5R|A/1.24426e-51/Chain A, Structure Determination Of The Small Ubiquitin-Related Modifier Sumo-1, Nmr, 10 Structures
ENSRNOG00000005061	Dlst	-2.94386	0.873188	K00658|1|0.0|694|rno:299201|2-oxoglutarate dehydrogenase E2 component (dihydrolipoamide succinyltransferase) [EC:2.3.1.61]	GO:0043234//protein complex;GO:0044429//mitochondrial part;GO:0016020//membrane	GO:0016751;GO:0005515//protein binding	GO:0043648//dicarboxylic acid metabolic process;GO:0006553//lysine metabolic process;GO:0009060//aerobic respiration;GO:0019674//NAD metabolic process	gi|62512126|sp|Q01205.2|ODO2_RAT/0/RecName: Full=Dihydrolipoyllysine-residue succinyltransferase component of 2-oxoglutarate dehydrogenase complex, mitochondrial; AltName: Full=2-oxoglutarate dehydrogenase complex component E2; Short=OGDC-E2; AltName: Full=Dihydrolipoamide succinyltransferase component of 2-oxoglutarate dehydrogenase complex; AltName: Full=E2K; Flags: Precursor
ENSRNOG00000012181	Lpl	3.79919	0.904071	K01059|1|0.0|938|rno:24539|lipoprotein lipase [EC:3.1.1.34]	GO:0031224//intrinsic to membrane;GO:0034385	GO:0008289//lipid binding;GO:0004091//carboxylesterase activity;GO:0005515//protein binding;GO:0005539//glycosaminoglycan binding	GO:0006631//fatty acid metabolic process;GO:0006641//triglyceride metabolic process;GO:0034370//triglyceride-rich lipoprotein particle remodeling;GO:0042221//response to chemical stimulus;GO:0010884//positive regulation of lipid storage;GO:0010742//macrophage derived foam cell differentiation;GO:0055088//lipid homeostasis;GO:0010878//cholesterol storage	gi|6981168|ref|NP_036730.1|/0/lipoprotein lipase precursor [Rattus norvegicus]
ENSRNOG00000000466	Hsd17b8	3.66989	0.887956	K13370|1|7e-109|394|rno:361802|estradiol 17beta-dehydrogenase / testosterone 17beta-dehydrogenase / [EC:1.1.1.62 1.1.1.63]	GO:0031967;GO:0044429//mitochondrial part;GO:0016020//membrane	GO:0033764//steroid dehydrogenase activity, acting on the CH-OH group of donors, NAD or NADP as acceptor;GO:0005488//binding	GO:0006631//fatty acid metabolic process;GO:0006694//steroid biosynthetic process	gi|47087119|ref|NP_997694.1|/5.77406e-108/estradiol 17-beta-dehydrogenase 8 [Rattus norvegicus]
ENSRNOG00000021735	Akr1cl	3.87702	0.906185	K00037|1|5e-130|464|hsa:1109|3-alpha-hydroxysteroid dehydrogenase [EC:1.1.1.50] K00089 3alpha-hydroxysteroid dehydrogenase (A-specific) [EC:1.1.1.213] K00092 chlordecone reductase [EC:1.1.1.225] K00212 trans-1,2-dihydrobenzene-1,2-diol dehydrogenase [EC:1.3.1.20];K00100|2|1e-129|463|mmu:83702|[EC:1.1.1.-];K00089|3|3e-126|452|hsa:1645|3alpha-hydroxysteroid dehydrogenase (A-specific) [EC:1.1.1.213]…	-	GO:0003824//catalytic activity	GO:0008152//metabolic process	gi|158138555|ref|NP_001103370.1|/2.81355e-178/aldo-keto reductase family 1, member C-like [Rattus norvegicus]
ENSRNOG00000020902	G6pc3	2.78269	0.824519	K01084|1|6e-58|225|acs:100557368|glucose-6-phosphatase [EC:3.1.3.9]	GO:0031090//organelle membrane;GO:0043231//intracellular membrane-bounded organelle;GO:0031224//intrinsic to membrane	GO:0019203//carbohydrate phosphatase activity	GO:0015712//hexose phosphate transport;GO:0006006//glucose metabolic process;GO:0006796//phosphate-containing compound metabolic process	gi|51036684|ref|NP_788266.2|/0/glucose-6-phosphatase 3 [Rattus norvegicus]
ENSRNOG00000008348	Cdc34	-2.14676	0.851509	K02207|1|6e-120|431|rno:299602|ubiquitin-conjugating enzyme E2 R [EC:6.3.2.19]	GO:0031981//nuclear lumen	GO:0016787//hydrolase activity;GO:0032559;GO:0019787//small conjugating protein ligase activity	GO:0000209//protein polyubiquitination;GO:0010033//response to organic substance;GO:0009968//negative regulation of signal transduction;GO:0006259//DNA metabolic process;GO:0006511//ubiquitin-dependent protein catabolic process;GO:0022402//cell cycle process;GO:0043065//positive regulation of apoptotic process	gi|29243988|ref|NP_808281.1|/4.89044e-119/ubiquitin-conjugating enzyme E2 R1 [Mus musculus]
ENSRNOG00000013090	Gadd45g	-2.15076	0.856853	K04402|1|5e-88|325|rno:291005|growth arrest and DNA-damage-inducible protein	GO:0043231//intracellular membrane-bounded organelle	GO:0005488//binding	GO:0012501//programmed cell death;GO:0006259//DNA metabolic process;GO:0007049//cell cycle;GO:0000165//MAPK cascade;GO:0032609//interferon-gamma production;GO:0042093//T-helper cell differentiation;GO:0033673//negative regulation of kinase activity	gi|117647202|ref|NP_001071108.1|/3.85248e-87/growth arrest and DNA damage-inducible protein GADD45 gamma [Rattus norvegicus]
ENSRNOG00000006911	Sptb	-2.49652	0.801241	K06115|1|0.0|4018|rno:314251|spectrin beta	GO:0032991//macromolecular complex;GO:0030864//cortical actin cytoskeleton;GO:0009898//internal side of plasma membrane	GO:0005198//structural molecule activity;GO:0003779//actin binding	GO:0030835//negative regulation of actin filament depolymerization;GO:0006778//porphyrin-containing compound metabolic process;GO:0006935//chemotaxis	gi|47058982|ref|NP_997687.1|/0/spectrin beta chain, erythrocyte [Rattus norvegicus]
ENSRNOG00000016368	Ppp1r14c	-2.38655	0.846892	K05744|1|2e-27|125|pon:100460494|LIM domain kinase 2 [EC:2.7.11.1];K12328|3|3e-17|91.7|bta:615348|protein phosphatase 1 regulatory subunit 14A	GO:0044424//intracellular part	GO:0004864//protein phosphatase inhibitor activity	GO:0019222//regulation of metabolic process;GO:0016310//phosphorylation;GO:0023052//signaling	gi|19173802|ref|NP_596916.1|/1.62151e-44/protein phosphatase 1 regulatory subunit 14C [Rattus norvegicus]
ENSRNOG00000020956	Bcat2	-2.53708	0.857063	K00826|1|0.0|814|rno:64203|branched-chain amino acid aminotransferase [EC:2.6.1.42]	GO:0044429//mitochondrial part	GO:0004084//branched-chain-amino-acid transaminase activity	GO:0006549//isoleucine metabolic process;GO:0006551//leucine metabolic process;GO:0008652//cellular amino acid biosynthetic process;GO:0007589//body fluid secretion;GO:0009063//cellular amino acid catabolic process	gi|149055898|gb|EDM07329.1|/0/branched chain aminotransferase 2, mitochondrial, isoform CRA_b [Rattus norvegicus]
ENSRNOG00000029333	Echdc2	-2.66106	0.847965	K05607|1|2e-77|290|xla:734576|methylglutaconyl-CoA hydratase [EC:4.2.1.18]	GO:0043231//intracellular membrane-bounded organelle	GO:0003824//catalytic activity	GO:0044238//primary metabolic process;GO:0032787//monocarboxylic acid metabolic process	gi|157821153|ref|NP_001100145.1|/2.39397e-146/enoyl-CoA hydratase domain-containing protein 2, mitochondrial [Rattus norvegicus]
ENSRNOG00000007043	RGD1305089	3.34082	0.816409	-	GO:0043231//intracellular membrane-bounded organelle	-	GO:0006399//tRNA metabolic process	gi|157822293|ref|NP_001100200.1|/0/mitochondrial ribonuclease P protein 3 precursor [Rattus norvegicus]
ENSRNOG00000008364	Cat	3.72461	0.899642	K03781|1|0.0|1107|rno:24248|catalase [EC:1.11.1.6]	GO:0016020//membrane;GO:0000323//lytic vacuole;GO:0005740//mitochondrial envelope;GO:0044439	GO:0016811//hydrolase activity, acting on carbon-nitrogen (but not peptide) bonds, in linear amides;GO:0000166//nucleotide binding;GO:0004601//peroxidase activity;GO:0042802//identical protein binding;GO:0005506//iron ion binding	GO:0016125//sterol metabolic process;GO:0006639//acylglycerol metabolic process;GO:0042743//hydrogen peroxide metabolic process;GO:0051091//positive regulation of sequence-specific DNA binding transcription factor activity;GO:0009411//response to UV;GO:0043433//negative regulation of sequence-specific DNA binding transcription factor activity;GO:0051259//protein oligomerization;GO:0009967//positi…	gi|6978607|ref|NP_036652.1|/0/catalase [Rattus norvegicus]
ENSRNOG00000019861	Tollip	4.16543	0.876659	K05402|1|4e-125|450|rno:361677|toll-interacting protein	GO:0043235//receptor complex;GO:0044444//cytoplasmic part	GO:0060089;GO:0005102//receptor binding;GO:0019899//enzyme binding	GO:0001775//cell activation;GO:0006952//defense response;GO:0007165//signal transduction;GO:0006796//phosphate-containing compound metabolic process;GO:0007154//cell communication	gi|157823763|ref|NP_001103138.1|/2.93245e-124/toll-interacting protein [Rattus norvegicus]
ENSRNOG00000019077	Lipa	4.09178	0.88336	K01052|1|0.0|809|rno:25055|lysosomal acid lipase/cholesteryl ester hydrolase [EC:3.1.1.13]	GO:0000323//lytic vacuole	GO:0004091//carboxylesterase activity	GO:0006952//defense response;GO:0030323//respiratory tube development;GO:0006629//lipid metabolic process;GO:0006066//alcohol metabolic process;GO:0001894//tissue homeostasis;GO:0032787//monocarboxylic acid metabolic process;GO:0032989	gi|77917572|ref|NP_036864.3|/0/lysosomal acid lipase/cholesteryl ester hydrolase precursor [Rattus norvegicus]
ENSRNOG00000020005	Map2k2	3.90187	0.898065	K04369|1|0.0|703|rno:58960|mitogen-activated protein kinase kinase 2 [EC:2.7.12.2]	GO:0044444//cytoplasmic part	GO:0004712//protein serine/threonine/tyrosine kinase activity;GO:0032559	GO:0006796//phosphate-containing compound metabolic process;GO:0002224//toll-like receptor signaling pathway;GO:0007169//transmembrane receptor protein tyrosine kinase signaling pathway;GO:0007264//small GTPase mediated signal transduction;GO:0006935//chemotaxis;GO:0006464//cellular protein modification process;GO:0000165//MAPK cascade	gi|18959214|ref|NP_579817.1|/0/dual specificity mitogen-activated protein kinase kinase 2 [Rattus norvegicus]
ENSRNOG00000006741	Podnl1	4.61891	0.832281	K08764|1|2e-121|437|cfa:479564|sterol carrier protein 2 [EC:2.3.1.176]	GO:0031012//extracellular matrix	-	-	gi|392334331|ref|XP_001068151.3|/0/PREDICTED: podocan-like protein 1-like [Rattus norvegicus]
ENSRNOG00000018114	Acadvl	3.57331	0.892847	K09479|1|0.0|1204|rno:25363|very long chain acyl-CoA dehydrogenase [EC:1.3.99.-]	GO:0019866//organelle inner membrane;GO:0005759//mitochondrial matrix	GO:0003995//acyl-CoA dehydrogenase activity;GO:0050662//coenzyme binding;GO:0005504//fatty acid binding	GO:0000038//very long-chain fatty acid metabolic process;GO:0045922//negative regulation of fatty acid metabolic process;GO:0006091//generation of precursor metabolites and energy;GO:0031327;GO:0006635//fatty acid beta-oxidation;GO:0048871//multicellular organismal homeostasis;GO:0008203//cholesterol metabolic process	gi|56541110|gb|AAH87036.1|/0/Acyl-Coenzyme A dehydrogenase, very long chain [Rattus norvegicus]
ENSRNOG00000001440	Mdh2	4.73144	0.94279	K00026|1|9e-180|630|rno:81829|malate dehydrogenase [EC:1.1.1.37]	GO:0031981//nuclear lumen;GO:0019866//organelle inner membrane;GO:0044429//mitochondrial part	GO:0016615//malate dehydrogenase activity;GO:0005515//protein binding	GO:0043648//dicarboxylic acid metabolic process;GO:0009060//aerobic respiration;GO:0019674//NAD metabolic process;GO:0006006//glucose metabolic process	gi|42476181|ref|NP_112413.2|/7.3293e-179/malate dehydrogenase, mitochondrial precursor [Rattus norvegicus]
ENSRNOG00000014948	Osgin1	3.21104	0.874808	-	-	GO:0005102//receptor binding	GO:0032501//multicellular organismal process;GO:0016049//cell growth;GO:0050789//regulation of biological process;GO:0048869//cellular developmental process	gi|19923094|ref|NP_612513.1|/0/oxidative stress-induced growth inhibitor 1 [Rattus norvegicus]
ENSRNOG00000028384	Npepl1	3.88304	0.892742	K09611|1|0.0|903|mmu:228961|probable aminopeptidase NPEPL1 [EC:3.4.11.-]	GO:0044424//intracellular part	GO:0046914//transition metal ion binding;GO:0008237//metallopeptidase activity;GO:0008238//exopeptidase activity	GO:0019538//protein metabolic process	gi|354468753|ref|XP_003496816.1|/0/PREDICTED: probable aminopeptidase NPEPL1 [Cricetulus griseus]
ENSRNOG00000012343	Pdp2	3.43753	0.823677	K01102|1|0.0|1042|rno:246311|pyruvate dehydrogenase phosphatase [EC:3.1.3.43]	GO:0043234//protein complex;GO:0005759//mitochondrial matrix	GO:0043169//cation binding;GO:0004722//protein serine/threonine phosphatase activity	GO:0006796//phosphate-containing compound metabolic process;GO:0006086//acetyl-CoA biosynthetic process from pyruvate;GO:0006464//cellular protein modification process	gi|48675865|ref|NP_659559.2|/0/[Pyruvate dehydrogenase [acetyl-transferring]]-phosphatase 2, mitochondrial precursor [Rattus norvegicus]
ENSRNOG00000037580	Psmd8	-1.70977	0.831598	K03031|1|2e-170|599|rno:292766|26S proteasome regulatory subunit N12	GO:0031981//nuclear lumen;GO:0022624//proteasome accessory complex	GO:0005488//binding	GO:0043161//proteasomal ubiquitin-dependent protein catabolic process;GO:0051320//S phase;GO:0007050//cell cycle arrest;GO:0016070//RNA metabolic process;GO:0051439//regulation of ubiquitin-protein ligase activity involved in mitotic cell cycle;GO:0006520//cellular amino acid metabolic process;GO:0006915//apoptotic process;GO:0030330//DNA damage response, signal transduction by p53 class mediator	gi|213972605|ref|NP_001094301.1|/1.32669e-169/proteasome 26S subunit, non-ATPase, 8 [Rattus norvegicus]
ENSRNOG00000048870	St6galnac4	-2.5734	0.803313	K03374|1|9e-167|586|rno:407764|N-acetylgalactosaminide alpha-2,6-sialyltransferase (sialyltransferase 7D) [EC:2.4.99.7]	GO:0031228//intrinsic to Golgi membrane;GO:0031228//intrinsic to Golgi membrane	GO:0008373//sialyltransferase activity;GO:0008373//sialyltransferase activity	GO:0006643//membrane lipid metabolic process;GO:0006464//cellular protein modification process;GO:0006643//membrane lipid metabolic process;GO:0006464//cellular protein modification process	gi|293345840|ref|XP_001080040.2|/2.29704e-177/PREDICTED: alpha-N-acetyl-neuraminyl-2,3-beta-galactosyl-1,3-N-acetyl-galactosaminide alpha-2,6-sialyltransferase [Rattus norvegicus]
ENSRNOG00000000842	Ddah2	3.43388	0.855759	K01482|1|7e-129|461|rno:294239|dimethylargininase [EC:3.5.3.18]	GO:0044424//intracellular part	GO:0016813//hydrolase activity, acting on carbon-nitrogen (but not peptide) bonds, in linear amidines;GO:0031406//carboxylic acid binding	GO:0006575//cellular modified amino acid metabolic process;GO:0044271//cellular nitrogen compound biosynthetic process;GO:0007165//signal transduction;GO:0043066//negative regulation of apoptotic process;GO:0006525//arginine metabolic process	gi|344239177|gb|EGV95280.1|/1.47662e-134/N(G),N(G)-dimethylarginine dimethylaminohydrolase 2 [Cricetulus griseus]
ENSRNOG00000011933	Csnk2a2	3.1102	0.84341	K03097|1|0.0|671|rno:307641|casein kinase II subunit alpha [EC:2.7.11.1]	GO:0043234//protein complex;GO:0044444//cytoplasmic part	GO:0004672//protein kinase activity;GO:0005515//protein binding;GO:0032559	GO:0007049//cell cycle;GO:0006796//phosphate-containing compound metabolic process;GO:0006935//chemotaxis;GO:0007166//cell surface receptor signaling pathway;GO:0006464//cellular protein modification process	gi|195540240|gb|AAI68200.1|/0/Casein kinase 2, alpha prime polypeptide [Rattus norvegicus]
ENSRNOG00000000541	Glo1	3.84545	0.899421	K01759|1|8e-106|384|rno:294320|lactoylglutathione lyase [EC:4.4.1.5]	-	GO:0043169//cation binding;GO:0016846//carbon-sulfur lyase activity	GO:0006790//sulfur compound metabolic process;GO:0043066//negative regulation of apoptotic process;GO:0006081//cellular aldehyde metabolic process;GO:0044238//primary metabolic process	gi|46485429|ref|NP_997477.1|/6.76143e-105/lactoylglutathione lyase [Rattus norvegicus]
ENSRNOG00000001171	Coq5	3.86472	0.881813	K06127|1|0.0|666|rno:304542|ubiquinone biosynthesis methyltransferase [EC:2.1.1.201]	GO:0043231//intracellular membrane-bounded organelle	GO:0016741	GO:0006743//ubiquinone metabolic process;GO:0006730//one-carbon metabolic process	gi|84781656|ref|NP_001034111.1|/0/2-methoxy-6-polyprenyl-1,4-benzoquinol methylase, mitochondrial precursor [Rattus norvegicus]
ENSRNOG00000003942	Asnsd1	3.26855	0.865888	-	-	GO:0016884//carbon-nitrogen ligase activity, with glutamine as amido-N-donor	GO:0009064//glutamine family amino acid metabolic process;GO:0006528//asparagine metabolic process	gi|157823035|ref|NP_001100233.1|/0/asparagine synthetase domain-containing protein 1 [Rattus norvegicus]
ENSRNOG00000007325	Usp28	3.51682	0.861197	K11849|1|0.0|2060|rno:315639|ubiquitin carboxyl-terminal hydrolase 25/28 [EC:3.1.2.15]	GO:0031981//nuclear lumen;GO:0031981//nuclear lumen	GO:0005488//binding;GO:0016790//thiolester hydrolase activity;GO:0019783//small conjugating protein-specific protease activity;GO:0005488//binding;GO:0016790//thiolester hydrolase activity;GO:0019783//small conjugating protein-specific protease activity	GO:0009314//response to radiation;GO:0006259//DNA metabolic process;GO:0019941//modification-dependent protein catabolic process;GO:0008630//intrinsic apoptotic signaling pathway in response to DNA damage response;GO:0070646//protein modification by small protein removal;GO:0009314//response to radiation;GO:0006259//DNA metabolic process;GO:0019941//modification-dependent protein catabolic proces…	gi|164456210|dbj|BAF97608.1|/0/deubiquitinating enzyme [Rattus norvegicus]
ENSRNOG00000011142	Cyb5b	4.2736	0.89128	K10226|1|2e-10|68.9|tgu:100222881|fatty acid desaturase 2 (delta-6 desaturase) [EC:1.14.19.-];K10595|2|3e-10|68.6|tad:TRIADDRAFT_56425|E3 ubiquitin-protein ligase HERC2 [EC:6.3.2.19];K10224|4|3e-10|68.6|xtr:100489232|fatty acid desaturase 1 (delta-5 desaturase) [EC:1.14.19.-]	GO:0019866//organelle inner membrane;GO:0031224//intrinsic to membrane;GO:0031966//mitochondrial membrane	GO:0009055//electron carrier activity;GO:0005506//iron ion binding;GO:0030234//enzyme regulator activity	GO:0019222//regulation of metabolic process;GO:0051234//establishment of localization;GO:0006091//generation of precursor metabolites and energy	gi|13399338|ref|NP_085075.1|/2.11912e-81/cytochrome b5 type B precursor [Rattus norvegicus]
ENSRNOG00000018964	Gss	-2.02258	0.810561	K01920|1|0.0|906|rno:25458|glutathione synthase [EC:6.3.2.3]	-	GO:0042277//peptide binding;GO:0046872//metal ion binding;GO:0042802//identical protein binding;GO:0016881//acid-amino acid ligase activity;GO:0016597//amino acid binding;GO:0032559	GO:0010038//response to metal ion;GO:0001101//response to acid;GO:0006749//glutathione metabolic process;GO:0009991//response to extracellular stimulus;GO:0034097//response to cytokine stimulus;GO:0032502//developmental process	gi|149030883|gb|EDL85910.1|/0/glutathione synthetase, isoform CRA_c [Rattus norvegicus]
ENSRNOG00000023433	Gata6	-2.96016	0.84504	K09183|1|0.0|753|mmu:14465|GATA-binding protein 4/5/6	GO:0031981//nuclear lumen;GO:0043234//protein complex	GO:0019900//kinase binding;GO:0043566//structure-specific DNA binding;GO:0043565//sequence-specific DNA binding;GO:0000981//sequence-specific DNA binding RNA polymerase II transcription factor activity	GO:0002065;GO:0006915//apoptotic process;GO:0060487//lung epithelial cell differentiation;GO:0042692//muscle cell differentiation;GO:0008406//gonad development;GO:0045765//regulation of angiogenesis;GO:0043009//chordate embryonic development;GO:0032870//cellular response to hormone stimulus;GO:0032906;GO:0019637//organophosphate metabolic process;GO:0042476//odontogenesis;GO:0001666//response to …	gi|215274094|sp|P46153.2|GATA6_RAT/0/RecName: Full=Transcription factor GATA-6; AltName: Full=DNA-binding protein GATA-GT2; AltName: Full=GATA-binding factor 6
ENSRNOG00000007583	Pygb	-2.02819	0.845787	K00688|1|0.0|1654|rno:25739|starch phosphorylase [EC:2.4.1.1]	GO:0043005//neuron projection;GO:0044424//intracellular part	GO:0042802//identical protein binding;GO:0004645//phosphorylase activity;GO:0030246//carbohydrate binding;GO:0048037//cofactor binding	GO:0005977//glycogen metabolic process;GO:0019318//hexose metabolic process	gi|158187544|ref|NP_037320.1|/0/glycogen phosphorylase, brain form [Rattus norvegicus]
ENSRNOG00000009715	Me1	-2.38739	0.852635	K00029|1|0.0|1037|rno:24552|malate dehydrogenase (oxaloacetate-decarboxylating)(NADP+) [EC:1.1.1.40]	GO:0043231//intracellular membrane-bounded organelle;GO:0044444//cytoplasmic part	GO:0046914//transition metal ion binding;GO:0004470//malic enzyme activity;GO:0032559	GO:0006629//lipid metabolic process;GO:0043648//dicarboxylic acid metabolic process;GO:0051259//protein oligomerization;GO:0006739//NADP metabolic process;GO:0009719;GO:0010033//response to organic substance	gi|205294|gb|AAA41563.1|/0/malic enzyme [Rattus norvegicus]
ENSRNOG00000017311	Me3	-2.28927	0.84889	K00029|1|0.0|1196|rno:361602|malate dehydrogenase (oxaloacetate-decarboxylating)(NADP+) [EC:1.1.1.40]	GO:0044429//mitochondrial part	GO:0043169//cation binding;GO:0004470//malic enzyme activity;GO:0000166//nucleotide binding	GO:0045333//cellular respiration;GO:0032787//monocarboxylic acid metabolic process;GO:0043648//dicarboxylic acid metabolic process	gi|239049264|ref|NP_001101961.2|/0/NADP-dependent malic enzyme, mitochondrial [Rattus norvegicus]
ENSRNOG00000029572	Apeh	3.03772	0.828905	K01303|1|0.0|1507|rno:24206|acylaminoacyl-peptidase [EC:3.4.19.1]	GO:0005635//nuclear envelope	GO:0004175//endopeptidase activity	GO:0019538//protein metabolic process	gi|149018550|gb|EDL77191.1|/0/acylpeptide hydrolase, isoform CRA_a [Rattus norvegicus]
ENSRNOG00000004726	Mapkapk2	3.50834	0.890134	K04443|1|6e-176|618|rno:289014|mitogen-activated protein kinase-activated protein kinase 2 [EC:2.7.11.1]	GO:0031981//nuclear lumen;GO:0044444//cytoplasmic part	GO:0060089;GO:0004672//protein kinase activity;GO:0032559	GO:0043488//regulation of mRNA stability;GO:0006796//phosphate-containing compound metabolic process;GO:0009058//biosynthetic process;GO:0002224//toll-like receptor signaling pathway;GO:0007169//transmembrane receptor protein tyrosine kinase signaling pathway;GO:0007264//small GTPase mediated signal transduction;GO:0006464//cellular protein modification process;GO:0006691//leukotriene metabolic p…	gi|30017431|ref|NP_835203.1|/4.76287e-175/MAP kinase-activated protein kinase 2 [Rattus norvegicus]
ENSRNOG00000009399	RGD1311224	4.54487	0.840139	K10226|1|4e-166|585|gga:423122|fatty acid desaturase 2 (delta-6 desaturase) [EC:1.14.19.-]	GO:0043231//intracellular membrane-bounded organelle;GO:0031224//intrinsic to membrane	GO:0005506//iron ion binding;GO:0016705//oxidoreductase activity, acting on paired donors, with incorporation or reduction of molecular oxygen	GO:0051234//establishment of localization;GO:0006631//fatty acid metabolic process;GO:0006091//generation of precursor metabolites and energy	gi|149022448|gb|EDL79342.1|/0/rCG26407 [Rattus norvegicus]
ENSRNOG00000037664	Tbrg4	-2.24488	0.822878	K10356|1|9e-26|120|ssc:100512998|myosin I;K08290|2|2e-07|58.9|ssc:100233181|Fas-activated serine/threonine kinase [EC:2.7.11.8]	GO:0043231//intracellular membrane-bounded organelle	GO:0016301//kinase activity;GO:0032559	GO:0012501//programmed cell death;GO:0015980//energy derivation by oxidation of organic compounds;GO:0006796//phosphate-containing compound metabolic process	gi|58865880|ref|NP_001012154.1|/0/protein TBRG4 [Rattus norvegicus]
ENSRNOG00000031479	Hdlbp	3.90137	0.900316	K12886|1|2e-07|60.1|xtr:394952|heterogeneous nuclear ribonucleoprotein K;K13210|4|1e-06|57.4|mdo:100031718|far upstream element-binding protein	GO:0034358//plasma lipoprotein particle;GO:0043231//intracellular membrane-bounded organelle;GO:0016020//membrane	GO:0003676//nucleic acid binding	GO:0010876;GO:0051234//establishment of localization;GO:0016125//sterol metabolic process	gi|148708011|gb|EDL39958.1|/0/high density lipoprotein (HDL) binding protein, isoform CRA_h [Mus musculus]
ENSRNOG00000001719	Psmd2	-2.82655	0.868213	K03028|1|0.0|1633|rno:287984|26S proteasome regulatory subunit N1	GO:0022624//proteasome accessory complex	GO:0005488//binding	GO:0043161//proteasomal ubiquitin-dependent protein catabolic process;GO:0009894;GO:0051320//S phase;GO:0007050//cell cycle arrest;GO:0016070//RNA metabolic process;GO:0051439//regulation of ubiquitin-protein ligase activity involved in mitotic cell cycle;GO:0006520//cellular amino acid metabolic process;GO:0006915//apoptotic process;GO:0030330//DNA damage response, signal transduction by p53 cla…	gi|72255509|ref|NP_001026809.1|/0/26S proteasome non-ATPase regulatory subunit 2 [Rattus norvegicus]
ENSRNOG00000021024	Pi4kb	3.65124	0.857189	K00888|1|0.0|1573|rno:81747|phosphatidylinositol 4-kinase [EC:2.7.1.67]	GO:0031966//mitochondrial membrane;GO:0005789//endoplasmic reticulum membrane	GO:0001727//lipid kinase activity;GO:0032559	GO:0046488//phosphatidylinositol metabolic process;GO:0046474//glycerophospholipid biosynthetic process;GO:0006796//phosphate-containing compound metabolic process;GO:0048017//inositol lipid-mediated signaling;GO:0006897//endocytosis	gi|14389295|ref|NP_112345.1|/0/phosphatidylinositol 4-kinase beta [Rattus norvegicus]
ENSRNOG00000030654	Man2c1	-2.32246	0.802945	K01191|1|0.0|1901|rno:246136|alpha-mannosidase [EC:3.2.1.24]	GO:0043231//intracellular membrane-bounded organelle	GO:0046914//transition metal ion binding;GO:0015923//mannosidase activity	GO:0019318//hexose metabolic process	gi|21245094|ref|NP_640349.1|/0/alpha-mannosidase 2C1 [Rattus norvegicus]
ENSRNOG00000022448	Htra2	-2.41824	0.81157	K08669|1|0.0|795|rno:297376|HtrA serine peptidase 2 [EC:3.4.21.108]	GO:0031090//organelle membrane;GO:0005740//mitochondrial envelope;GO:0005887//integral to plasma membrane	GO:0004175//endopeptidase activity;GO:0005515//protein binding	GO:0006996//organelle organization;GO:0008344//adult locomotory behavior;GO:0006917//induction of apoptosis;GO:0007420//brain development;GO:0035264//multicellular organism growth;GO:0019538//protein metabolic process;GO:0048468//cell development	gi|157819535|ref|NP_001100069.1|/0/serine protease HTRA2, mitochondrial [Rattus norvegicus]
ENSRNOG00000010077	Smarcd3	-2.08492	0.824308	K11650|1|0.0|811|rno:296732|SWI/SNF-related matrix-associated actin-dependent regulator of chromatin subfamily D	GO:0031981//nuclear lumen;GO:0070603	GO:0003712//transcription cofactor activity;GO:0051427	GO:0006629//lipid metabolic process;GO:0006355//regulation of transcription, DNA-dependent;GO:0009887//organ morphogenesis;GO:0030154//cell differentiation;GO:0006325//chromatin organization;GO:0051098//regulation of binding	gi|58865508|ref|NP_001011966.1|/0/SWI/SNF-related matrix-associated actin-dependent regulator of chromatin subfamily D member 3 [Rattus norvegicus]
ENSRNOG00000018809	Psmd5	4.15359	0.899727	K06692|1|0.0|910|mmu:66998|26S proteasome non-ATPase regulatory subunit 5	GO:0005838//proteasome regulatory particle	GO:0005488//binding	GO:0043161//proteasomal ubiquitin-dependent protein catabolic process;GO:0051320//S phase;GO:0007050//cell cycle arrest;GO:0016070//RNA metabolic process;GO:0051439//regulation of ubiquitin-protein ligase activity involved in mitotic cell cycle;GO:0006520//cellular amino acid metabolic process;GO:0006915//apoptotic process;GO:0030330//DNA damage response, signal transduction by p53 class mediator…	gi|348041394|ref|NP_001100039.2|/0/26S proteasome non-ATPase regulatory subunit 5 [Rattus norvegicus]
ENSRNOG00000015953	Oaz2	3.27789	0.875344	-	GO:0043231//intracellular membrane-bounded organelle;GO:0044444//cytoplasmic part	GO:0005488//binding;GO:0004857//enzyme inhibitor activity	GO:0006576//cellular biogenic amine metabolic process;GO:0006520//cellular amino acid metabolic process	gi|158187519|ref|NP_001103369.1|/1.68037e-97/ornithine decarboxylase antizyme 2 [Rattus norvegicus]
ENSRNOG00000018755	Acss2	3.41105	0.85092	K01895|1|0.0|1407|rno:311569|acetyl-CoA synthetase [EC:6.2.1.1]	GO:0031981//nuclear lumen;GO:0044444//cytoplasmic part	GO:0016405//CoA-ligase activity;GO:0032559	GO:0006629//lipid metabolic process;GO:0019541//propionate metabolic process;GO:0006084//acetyl-CoA metabolic process;GO:0006067//ethanol metabolic process;GO:0006083//acetate metabolic process	gi|148674180|gb|EDL06127.1|/0/acyl-CoA synthetase short-chain family member 2 [Mus musculus]
ENSRNOG00000004908	Smc6	-2.29002	0.807037	K06675|1|3e-21|105|phu:Phum_PHUM319270|structural maintenance of chromosome 4;K11498|2|6e-19|97.8|hsa:1062|centromeric protein E;K12478|4|3e-18|95.5|aml:100478615|early endosome antigen 1	GO:0043232;GO:0043231//intracellular membrane-bounded organelle	GO:0032559	GO:0006259//DNA metabolic process;GO:0033554//cellular response to stress	gi|157819723|ref|NP_001101484.1|/0/structural maintenance of chromosomes protein 6 [Rattus norvegicus]
ENSRNOG00000009552	Serinc3	4.19146	0.911707	-	GO:0031224//intrinsic to membrane;GO:0043231//intracellular membrane-bounded organelle;GO:0012505//endomembrane system	GO:0015179//L-amino acid transmembrane transporter activity	GO:0012502//induction of programmed cell death;GO:0006643//membrane lipid metabolic process;GO:0006650//glycerophospholipid metabolic process;GO:0043085//positive regulation of catalytic activity;GO:0015807//L-amino acid transport	gi|56605704|ref|NP_001008313.1|/0/serine incorporator 3 precursor [Rattus norvegicus]
ENSRNOG00000021051	Cyth2	3.67847	0.878542	K12495|1|1e-41|171|bfo:BRAFLDRAFT_106693|IQ motif and SEC7 domain-containing protein	GO:0044424//intracellular part;GO:0016020//membrane	GO:0005083//small GTPase regulator activity;GO:0005488//binding	GO:0016192//vesicle-mediated transport;GO:0019222//regulation of metabolic process;GO:0031175//neuron projection development;GO:0007010//cytoskeleton organization;GO:0032011//ARF protein signal transduction;GO:0007155//cell adhesion	gi|332241233|ref|XP_003269786.1|/0/PREDICTED: cytohesin-2 isoform 2 [Nomascus leucogenys]
ENSRNOG00000013604	GPX4	-1.83723	0.84686	K05361|1|2e-117|422|rno:29328|phospholipid-hydroperoxide glutathione peroxidase [EC:1.11.1.12]	GO:0043231//intracellular membrane-bounded organelle;GO:0019866//organelle inner membrane;GO:0044444//cytoplasmic part;GO:0012505//endomembrane system	GO:0042277//peptide binding;GO:0016705//oxidoreductase activity, acting on paired donors, with incorporation or reduction of molecular oxygen;GO:0004601//peroxidase activity	GO:0043627//response to estrogen stimulus;GO:0051276//chromosome organization;GO:0006790//sulfur compound metabolic process;GO:0048232//male gamete generation;GO:0042743//hydrogen peroxide metabolic process;GO:0031347//regulation of defense response;GO:0032502//developmental process	gi|90903229|ref|NP_001034938.1|/1.31031e-116/phospholipid hydroperoxide glutathione peroxidase, nuclear isoform B [Rattus norvegicus]
ENSRNOG00000011899	Tmem150a	3.12473	0.854318	-	GO:0031224//intrinsic to membrane	-	GO:0008152//metabolic process	gi|20806155|ref|NP_620807.1|/1.98954e-151/transmembrane protein 150A precursor [Rattus norvegicus]
ENSRNOG00000010735	Nfyc	-2.68136	0.837267	K08066|1|1e-114|414|ecb:100053895|nuclear transcription factor Y, gamma	GO:0005667//transcription factor complex	GO:0003712//transcription cofactor activity;GO:0003676//nucleic acid binding;GO:0001071//nucleic acid binding transcription factor activity	GO:0044267//cellular protein metabolic process;GO:0006355//regulation of transcription, DNA-dependent	gi|31560663|ref|NP_032718.2|/8.24081e-114/nuclear transcription factor Y subunit gamma isoform 1 [Mus musculus]
ENSRNOG00000010034	Asah1	2.60045	0.844399	K12348|1|0.0|790|rno:84431|acid ceramidase [EC:3.5.1.23]	GO:0000323//lytic vacuole	GO:0016811//hydrolase activity, acting on carbon-nitrogen (but not peptide) bonds, in linear amides	GO:0042221//response to chemical stimulus;GO:0030323//respiratory tube development;GO:0044238//primary metabolic process	gi|40254747|ref|NP_445859.2|/0/acid ceramidase precursor [Rattus norvegicus]
ENSRNOG00000004612	Ppp1cb	4.06246	0.91054	K06269|1|0.0|672|acs:100552053|protein phosphatase 1, catalytic subunit [EC:3.1.3.16]	GO:0035097//histone methyltransferase complex;GO:0008287//protein serine/threonine phosphatase complex;GO:0044444//cytoplasmic part	GO:0043169//cation binding;GO:0004722//protein serine/threonine phosphatase activity	GO:0005980//glycogen catabolic process;GO:0006796//phosphate-containing compound metabolic process;GO:0006641//triglyceride metabolic process;GO:0005978//glycogen biosynthetic process;GO:0006464//cellular protein modification process	gi|50513466|pdb|1S70|A/0/Chain A, Complex Between Protein Ser/thr Phosphatase-1 (delta) And The Myosin Phosphatase Targeting Subunit 1 (mypt1)
ENSRNOG00000015857	Ctsa	3.11644	0.862827	K13289|1|0.0|887|rno:296370|cathepsin A (carboxypeptidase C) [EC:3.4.16.5]	GO:0000323//lytic vacuole;GO:0031981//nuclear lumen	GO:0005488//binding;GO:0004180//carboxypeptidase activity	GO:0019538//protein metabolic process	gi|58865488|ref|NP_001011959.1|/0/lysosomal protective protein precursor [Rattus norvegicus]
ENSRNOG00000002342	Aldh3a2	-2.76702	0.809603	K00128|1|0.0|902|rno:65183|aldehyde dehydrogenase (NAD+) [EC:1.2.1.3]	GO:0031224//intrinsic to membrane;GO:0019866//organelle inner membrane;GO:0005789//endoplasmic reticulum membrane	GO:0004030//aldehyde dehydrogenase [NAD(P)+] activity	GO:0006979//response to oxidative stress;GO:0009888//tissue development;GO:0044238//primary metabolic process;GO:0007399//nervous system development;GO:0006081//cellular aldehyde metabolic process	gi|166157462|ref|NP_113919.2|/0/fatty aldehyde dehydrogenase [Rattus norvegicus]
ENSRNOG00000009088	Txnrd1	3.45778	0.890891	K00384|1|0.0|972|rno:58819|thioredoxin reductase (NADPH) [EC:1.8.1.9]	GO:0031981//nuclear lumen;GO:0044444//cytoplasmic part	GO:0016651//oxidoreductase activity, acting on NADH or NADPH;GO:0000166//nucleotide binding;GO:0016209//antioxidant activity;GO:0050662//coenzyme binding	GO:0019725//cellular homeostasis;GO:0042743//hydrogen peroxide metabolic process;GO:0006950//response to stress;GO:0001704//formation of primary germ layer	gi|55250051|gb|AAH85726.1|/0/Txnrd1 protein [Rattus norvegicus]
ENSRNOG00000011352	Furin	3.10537	0.847176	K01349|1|0.0|1481|rno:54281|furin [EC:3.4.21.75]	GO:0030658//transport vesicle membrane;GO:0031224//intrinsic to membrane;GO:0005795//Golgi stack;GO:0005768//endosome;GO:0005798//Golgi-associated vesicle;GO:0044421//extracellular region part	GO:0004175//endopeptidase activity;GO:0043121//neurotrophin binding;GO:0043169//cation binding;GO:0004866//endopeptidase inhibitor activity;GO:0019899//enzyme binding	GO:0007179//transforming growth factor beta receptor signaling pathway;GO:0006518//peptide metabolic process;GO:0031330;GO:0032900//negative regulation of neurotrophin production;GO:0007169//transmembrane receptor protein tyrosine kinase signaling pathway;GO:0019058//viral infectious cycle;GO:0031331;GO:0016486//peptide hormone processing;GO:0018200;GO:0016477//cell migration;GO:0046903//secretio…	gi|149057322|gb|EDM08645.1|/0/rCG24589, isoform CRA_a [Rattus norvegicus]
ENSRNOG00000013949	Idh2	5.0208	0.954707	K00031|1|0.0|934|rno:361596|isocitrate dehydrogenase [EC:1.1.1.42]	GO:0019866//organelle inner membrane;GO:0044429//mitochondrial part	GO:0046872//metal ion binding;GO:0004448//isocitrate dehydrogenase activity;GO:0000166//nucleotide binding	GO:0050896//response to stimulus;GO:0043648//dicarboxylic acid metabolic process;GO:0044262//cellular carbohydrate metabolic process;GO:0009060//aerobic respiration	gi|62079055|ref|NP_001014183.1|/0/isocitrate dehydrogenase [NADP], mitochondrial precursor [Rattus norvegicus]
ENSRNOG00000018939	Rexo2	-2.22241	0.836205	K13288|1|4e-105|382|rno:300689|oligoribonuclease [EC:3.1.-.-]	GO:0043231//intracellular membrane-bounded organelle	GO:0005488//binding;GO:0004532//exoribonuclease activity	GO:0034641//cellular nitrogen compound metabolic process	gi|56605730|ref|NP_001008327.1|/3.07342e-104/oligoribonuclease, mitochondrial precursor [Rattus norvegicus]
ENSRNOG00000015072	Ptgr1	4.07747	0.91379	K13948|1|8e-179|626|rno:192227|rostaglandin reductase 1 [EC:1.3.1.74 1.3.1.48]	GO:0044424//intracellular part	GO:0046914//transition metal ion binding;GO:0016628//oxidoreductase activity, acting on the CH-CH group of donors, NAD or NADP as acceptor;GO:0016616//oxidoreductase activity, acting on the CH-OH group of donors, NAD or NADP as acceptor	GO:0006690//icosanoid metabolic process;GO:0042221//response to chemical stimulus	gi|20302022|ref|NP_620218.1|/6.77309e-178/prostaglandin reductase 1 [Rattus norvegicus]
ENSRNOG00000011745	Psma1	3.9358	0.90548	K02725|1|7e-141|500|cfa:476867|20S proteasome subunit alpha 6 [EC:3.4.25.1]	GO:0043231//intracellular membrane-bounded organelle;GO:0005839//proteasome core complex;GO:0030529//ribonucleoprotein complex	GO:0004175//endopeptidase activity;GO:0003676//nucleic acid binding	GO:0043161//proteasomal ubiquitin-dependent protein catabolic process;GO:0051320//S phase;GO:0002437//inflammatory response to antigenic stimulus;GO:0007050//cell cycle arrest;GO:0016070//RNA metabolic process;GO:0051439//regulation of ubiquitin-protein ligase activity involved in mitotic cell cycle;GO:0006520//cellular amino acid metabolic process;GO:0006915//apoptotic process;GO:0030330//DNA da…	gi|8394060|ref|NP_058974.1|/5.86031e-140/proteasome subunit alpha type-1 [Rattus norvegicus]
ENSRNOG00000018567	Slc20a1	3.59291	0.866256	K14640|1|0.0|1359|rno:81826|solute carrier family 20 (sodium-dependent phosphate transporter)	GO:0016021//integral to membrane	GO:0004871//signal transducer activity;GO:0005436//sodium:phosphate symporter activity	GO:0035725//sodium ion transmembrane transport;GO:0006793//phosphorus metabolic process;GO:0007249//I-kappaB kinase/NF-kappaB cascade;GO:0006817//phosphate ion transport	gi|25742611|ref|NP_112410.1|/0/sodium-dependent phosphate transporter 1 [Rattus norvegicus]
ENSRNOG00000013011	Dnajb4	3.60346	0.89229	K09510|1|0.0|650|rno:295549|DnaJ homolog subfamily B member 4	GO:0016020//membrane;GO:0044424//intracellular part	GO:0005515//protein binding	GO:0044267//cellular protein metabolic process;GO:0006950//response to stress	gi|61556870|ref|NP_001013094.1|/0/dnaJ homolog subfamily B member 4 [Rattus norvegicus]
ENSRNOG00000019246	Psme2	2.67885	0.85396	K06697|1|6e-116|418|rno:29614|proteasome activator subunit 2 (PA28 beta)	GO:0022624//proteasome accessory complex	GO:0061135	GO:0019882//antigen processing and presentation;GO:0043161//proteasomal ubiquitin-dependent protein catabolic process;GO:0051320//S phase;GO:0007050//cell cycle arrest;GO:0016070//RNA metabolic process;GO:0051439//regulation of ubiquitin-protein ligase activity involved in mitotic cell cycle;GO:0006520//cellular amino acid metabolic process;GO:0006915//apoptotic process;GO:0030330//DNA damage res…	gi|8394091|ref|NP_058953.1|/4.79419e-115/proteasome activator complex subunit 2 [Rattus norvegicus]
ENSRNOG00000016770	Calm3	3.28659	0.874503	K02183|1|6e-84|300|ptr:456153|calmodulin	GO:0031981//nuclear lumen;GO:0005815//microtubule organizing center;GO:0005819//spindle;GO:0008287//protein serine/threonine phosphatase complex;GO:0031674//I band;GO:0016020//membrane	GO:0047485//protein N-terminus binding;GO:0046872//metal ion binding;GO:0016772//transferase activity, transferring phosphorus-containing groups;GO:0019900//kinase binding;GO:0008092//cytoskeletal protein binding;GO:0016247//channel regulator activity;GO:0016791//phosphatase activity	GO:0001775//cell activation;GO:0014808//release of sequestered calcium ion into cytosol by sarcoplasmic reticulum;GO:0003012//muscle system process;GO:0019318//hexose metabolic process;GO:0007169//transmembrane receptor protein tyrosine kinase signaling pathway;GO:0032414//positive regulation of ion transmembrane transporter activity;GO:0051899//membrane depolarization;GO:0006887//exocytosis;GO:0…	gi|351697936|gb|EHB00855.1|/3.12895e-79/Calmodulin [Heterocephalus glaber]
ENSRNOG00000020623	Aldh16a1	4.67796	0.866162	K00128|1|1e-173|611|xla:734715|aldehyde dehydrogenase (NAD+) [EC:1.2.1.3]	-	GO:0005488//binding;GO:0003824//catalytic activity	GO:0008152//metabolic process	gi|76096352|ref|NP_001028878.1|/0/aldehyde dehydrogenase family 16 member A1 [Rattus norvegicus]
ENSRNOG00000020179	Nt5c2	-2.38966	0.814126	K01081|1|0.0|1059|rno:100363253|5'-nucleotidase [EC:3.1.3.5]	GO:0044444//cytoplasmic part	GO:0008252//nucleotidase activity;GO:0043169//cation binding	GO:0006163//purine nucleotide metabolic process;GO:0009112;GO:0006796//phosphate-containing compound metabolic process	gi|293356572|ref|XP_002728937.1|/0/PREDICTED: cytosolic purine 5'-nucleotidase-like [Rattus norvegicus]
ENSRNOG00000033196	-	2.37107	0.825508	-	-	-	-	-
ENSRNOG00000006556	Slc5a6	3.26512	0.801325	K14386|1|0.0|1174|rno:170551|solute carrier family 5 (sodium-dependent multivitamin transporter), member 6	GO:0016021//integral to membrane;GO:0005903//brush border;GO:0012505//endomembrane system	GO:0051183//vitamin transporter activity;GO:0015291//secondary active transmembrane transporter activity	GO:0006575//cellular modified amino acid metabolic process;GO:0006790//sulfur compound metabolic process;GO:0006766//vitamin metabolic process;GO:0035725//sodium ion transmembrane transport;GO:0035461;GO:0015718//monocarboxylic acid transport	gi|18543353|ref|NP_570102.1|/0/sodium-dependent multivitamin transporter [Rattus norvegicus]
ENSRNOG00000020134	Upf1	2.99104	0.801168	K14326|1|0.0|2133|mmu:19704|regulator of nonsense transcripts 1 [EC:3.6.4.-]	GO:0044427//chromosomal part;GO:0030529//ribonucleoprotein complex	GO:0003724//RNA helicase activity;GO:0046914//transition metal ion binding;GO:0003676//nucleic acid binding;GO:0032559	GO:0006415//translational termination;GO:0000956//nuclear-transcribed mRNA catabolic process;GO:0006259//DNA metabolic process;GO:0009207;GO:0006405//RNA export from nucleus	gi|392333562|ref|XP_003752928.1|/0/PREDICTED: regulator of nonsense transcripts 1-like isoform 2 [Rattus norvegicus]
ENSRNOG00000021781	Camk1	-2.29635	0.824088	K08794|1|0.0|735|rno:171503|calcium/calmodulin-dependent protein kinase I [EC:2.7.11.17]	GO:0043231//intracellular membrane-bounded organelle;GO:0043234//protein complex	GO:0004674//protein serine/threonine kinase activity;GO:0005515//protein binding;GO:0032559	GO:0048731;GO:0006796//phosphate-containing compound metabolic process;GO:0023052//signaling;GO:0045597//positive regulation of cell differentiation;GO:0051169//nuclear transport;GO:0006464//cellular protein modification process	gi|431899910|gb|ELK07857.1|/0/Calcium/calmodulin-dependent protein kinase type 1 [Pteropus alecto]
ENSRNOG00000047089	Alkbh7	-2.09933	0.827453	K10769|1|3e-106|385|rno:679944|alkylated DNA repair protein alkB homolog 7 [EC:1.14.11.-]	GO:0043231//intracellular membrane-bounded organelle	GO:0016706//oxidoreductase activity, acting on paired donors, with incorporation or reduction of molecular oxygen, 2-oxoglutarate as one donor, and incorporation of one atom each of oxygen into both donors;GO:0043169//cation binding;GO:0016701//oxidoreductase activity, acting on single donors with incorporation of molecular oxygen	GO:0008152//metabolic process	gi|157820455|ref|NP_001102854.1|/2.11851e-105/alkylated DNA repair protein alkB homolog 7 [Rattus norvegicus]
ENSRNOG00000011953	Supt16h	3.54444	0.837467	-	GO:0031981//nuclear lumen;GO:0043232	GO:0032561//guanyl ribonucleotide binding	GO:0006259//DNA metabolic process;GO:0033554//cellular response to stress;GO:0034728//nucleosome organization;GO:0045935;GO:0006354//DNA-dependent transcription, elongation	gi|335292602|ref|XP_001929215.3|/0/PREDICTED: FACT complex subunit SPT16 [Sus scrofa]
ENSRNOG00000011194	Tpp2	1.71874	0.801262	K01280|1|0.0|2346|rno:81815|tripeptidyl-peptidase II [EC:3.4.14.10]	GO:0043231//intracellular membrane-bounded organelle	GO:0005488//binding;GO:0004175//endopeptidase activity;GO:0008238//exopeptidase activity;GO:0008236//serine-type peptidase activity	GO:0019538//protein metabolic process	gi|13592121|ref|NP_112399.1|/0/tripeptidyl-peptidase 2 [Rattus norvegicus]
ENSRNOG00000004911	Psmd14	-2.68155	0.851804	K03030|1|9e-166|583|ecb:100051409|26S proteasome regulatory subunit N11	GO:0043234//protein complex	GO:0070011;GO:0061135;GO:0016744;GO:0016790//thiolester hydrolase activity;GO:0043169//cation binding;GO:0032403//protein complex binding	GO:0010952//positive regulation of peptidase activity;GO:0043161//proteasomal ubiquitin-dependent protein catabolic process;GO:0016579//protein deubiquitination;GO:0051320//S phase;GO:0007050//cell cycle arrest;GO:0016070//RNA metabolic process;GO:0051439//regulation of ubiquitin-protein ligase activity involved in mitotic cell cycle;GO:0006520//cellular amino acid metabolic process;GO:0006915//a…	gi|471369967|ref|XP_004375497.1|/7.06386e-165/PREDICTED: 26S proteasome non-ATPase regulatory subunit 14 [Trichechus manatus latirostris]
ENSRNOG00000015273	Ak3	2.7336	0.862701	K00944|1|1e-124|446|mmu:56248|nucleoside-triphosphate--adenylate kinase [EC:2.7.4.10]	GO:0044429//mitochondrial part	GO:0016776//phosphotransferase activity, phosphate group as acceptor;GO:0032561//guanyl ribonucleotide binding;GO:0005515//protein binding;GO:0019205//nucleobase-containing compound kinase activity;GO:0032559	GO:0006796//phosphate-containing compound metabolic process;GO:0006754//ATP biosynthetic process;GO:0007599//hemostasis	gi|40352787|gb|AAH64656.1|/1.12785e-126/Ak3 protein [Rattus norvegicus]
ENSRNOG00000022922	Slc25a12	-2.01242	0.837667	K15105|1|0.0|1229|rno:362145|solute carrier family 25 (mitochondrial aspartate/glutamate transporter), member 12/13	GO:0031224//intrinsic to membrane;GO:0043231//intracellular membrane-bounded organelle;GO:0019866//organelle inner membrane	GO:0015172//acidic amino acid transmembrane transporter activity;GO:0046872//metal ion binding	GO:0010038//response to metal ion;GO:0006839//mitochondrial transport;GO:0009206;GO:0015711//organic anion transport;GO:0015980//energy derivation by oxidation of organic compounds;GO:0006006//glucose metabolic process;GO:0006865//amino acid transport	gi|293346045|ref|XP_002726232.1|/0/PREDICTED: LOW QUALITY PROTEIN: calcium-binding mitochondrial carrier protein Aralar1 [Rattus norvegicus]
ENSRNOG00000023095	Npepps	3.09268	0.847733	K08776|1|0.0|1716|rno:50558|puromycin-sensitive aminopeptidase [EC:3.4.11.-]	GO:0044444//cytoplasmic part;GO:0043231//intracellular membrane-bounded organelle	GO:0046914//transition metal ion binding;GO:0008238//exopeptidase activity	GO:0019538//protein metabolic process	gi|158749540|ref|NP_536320.1|/0/puromycin-sensitive aminopeptidase precursor [Rattus norvegicus]
ENSRNOG00000008945	Nans	4.14408	0.878027	K05304|1|0.0|727|rno:298071|sialic acid synthase [EC:2.5.1.56 2.5.1.57]	GO:0044444//cytoplasmic part	GO:0016765//transferase activity, transferring alkyl or aryl (other than methyl) groups;GO:0070567	GO:0005975//carbohydrate metabolic process;GO:0008610//lipid biosynthetic process	gi|164663874|ref|NP_001100125.2|/0/N-acetylneuraminic acid synthase [Rattus norvegicus]
ENSRNOG00000010667	Ept1	3.61341	0.850342	K00993|1|9e-100|365|rno:362713|ethanolaminephosphotransferase [EC:2.7.8.1]	GO:0031224//intrinsic to membrane	GO:0017169//CDP-alcohol phosphatidyltransferase activity;GO:0043169//cation binding	GO:0006644//phospholipid metabolic process	gi|207113155|ref|NP_001128226.2|/7.51775e-99/ethanolaminephosphotransferase 1 [Rattus norvegicus]
ENSRNOG00000021042	Psmd4	3.35986	0.882602	K03029|1|0.0|641|rno:83499|26S proteasome regulatory subunit N10	GO:0044424//intracellular part;GO:0043234//protein complex	GO:0046914//transition metal ion binding	GO:0006810//transport;GO:0043161//proteasomal ubiquitin-dependent protein catabolic process;GO:0051320//S phase;GO:0006259//DNA metabolic process;GO:0007050//cell cycle arrest;GO:0016070//RNA metabolic process;GO:0051439//regulation of ubiquitin-protein ligase activity involved in mitotic cell cycle;GO:0006520//cellular amino acid metabolic process;GO:0006915//apoptotic process;GO:0030330//DNA da…	gi|13786158|ref|NP_112621.1|/0/26S proteasome non-ATPase regulatory subunit 4 [Rattus norvegicus]
ENSRNOG00000014330	Pcmt1	3.98231	0.901567	K00573|1|2e-138|492|mmu:18537|protein-L-isoaspartate(D-aspartate) O-methyltransferase [EC:2.1.1.77]	GO:0043231//intracellular membrane-bounded organelle	GO:0005515//protein binding;GO:0003824//catalytic activity	GO:0006790//sulfur compound metabolic process;GO:0008213;GO:0006575//cellular modified amino acid metabolic process	gi|149039523|gb|EDL93685.1|/1.04849e-138/protein-L-isoaspartate (D-aspartate) O-methyltransferase 1, isoform CRA_d [Rattus norvegicus]
ENSRNOG00000012709	Bag2	3.84573	0.886757	K09556|1|3e-91|336|rno:690038|BCL2-associated athanogene 2	-	GO:0005488//binding	GO:0044267//cellular protein metabolic process;GO:0012501//programmed cell death	gi|189491875|ref|NP_001121667.1|/2.50756e-90/BAG family molecular chaperone regulator 2 [Rattus norvegicus]
ENSRNOG00000004883	Erh	-1.96507	0.839939	-	GO:0044464//cell part	GO:0005488//binding	GO:0006952//defense response;GO:0009116//nucleoside metabolic process	gi|157822151|ref|NP_001102912.1|/3.60579e-66/enhancer of rudimentary homolog [Rattus norvegicus]
ENSRNOG00000015295	Ctdsp1	2.79877	0.859398	K15731|1|2e-146|520|rno:363249|carboxy-terminal domain RNA polymerase II polypeptide A small phosphatase [EC:3.1.3.16]	GO:0043231//intracellular membrane-bounded organelle	GO:0043169//cation binding;GO:0004722//protein serine/threonine phosphatase activity	GO:0006464//cellular protein modification process;GO:0006796//phosphate-containing compound metabolic process;GO:0006355//regulation of transcription, DNA-dependent	gi|189303571|ref|NP_001121551.1|/1.3014e-145/carboxy-terminal domain RNA polymerase II polypeptide A small phosphatase 1 [Rattus norvegicus]
ENSRNOG00000000379	Dnajc12	3.70994	0.883275	K09532|1|4e-114|411|rno:619393|DnaJ homolog subfamily C member 12	-	GO:0005515//protein binding	GO:0044267//cellular protein metabolic process	gi|77404371|ref|NP_001029204.1|/3.56475e-113/dnaJ homolog subfamily C member 12 [Rattus norvegicus]
ENSRNOG00000020897	Prpf19	3.21756	0.871905	K10599|1|0.0|981|rno:246216|pre-mRNA-processing factor 19 [EC:6.3.2.19]	GO:0015630//microtubule cytoskeleton;GO:0005681//spliceosomal complex;GO:0016604//nuclear body;GO:0043234//protein complex;GO:0044444//cytoplasmic part	GO:0005515//protein binding;GO:0003676//nucleic acid binding;GO:0004842//ubiquitin-protein ligase activity	GO:0045596//negative regulation of cell differentiation;GO:0006259//DNA metabolic process;GO:0045687//positive regulation of glial cell differentiation;GO:0000398//mRNA splicing, via spliceosome;GO:0016567//protein ubiquitination;GO:0006629//lipid metabolic process;GO:0001832//blastocyst growth;GO:0033554//cellular response to stress	gi|148709445|gb|EDL41391.1|/0/PRP19/PSO4 pre-mRNA processing factor 19 homolog (S. cerevisiae), isoform CRA_a [Mus musculus]
ENSRNOG00000011782	Got2	-2.34413	0.862827	K14455|1|0.0|834|rno:25721|aspartate aminotransferase, mitochondrial [EC:2.6.1.1]	GO:0032991//macromolecular complex;GO:0019866//organelle inner membrane;GO:0044429//mitochondrial part;GO:0043025//neuronal cell body	GO:0008483//transaminase activity;GO:0042802//identical protein binding;GO:0008289//lipid binding;GO:0031406//carboxylic acid binding;GO:0048037//cofactor binding	GO:0006103//2-oxoglutarate metabolic process;GO:0009064//glutamine family amino acid metabolic process;GO:0006869//lipid transport;GO:0006006//glucose metabolic process;GO:0006531//aspartate metabolic process;GO:0010033//response to organic substance	gi|6980972|ref|NP_037309.1|/0/aspartate aminotransferase, mitochondrial [Rattus norvegicus]
ENSRNOG00000007114	Psma6	2.41744	0.861113	K02730|1|1e-139|496|ecb:100050805|20S proteasome subunit alpha 1 [EC:3.4.25.1]	GO:0034399//nuclear periphery;GO:0005839//proteasome core complex;GO:0030016//myofibril;GO:0030529//ribonucleoprotein complex	GO:0004175//endopeptidase activity;GO:0032555;GO:0003676//nucleic acid binding;GO:0008134//transcription factor binding	GO:0043161//proteasomal ubiquitin-dependent protein catabolic process;GO:0051091//positive regulation of sequence-specific DNA binding transcription factor activity;GO:0051320//S phase;GO:0007050//cell cycle arrest;GO:0051439//regulation of ubiquitin-protein ligase activity involved in mitotic cell cycle;GO:0006520//cellular amino acid metabolic process;GO:0006915//apoptotic process;GO:0030330//D…	gi|403263938|ref|XP_003924255.1|/2.01793e-140/PREDICTED: proteasome subunit alpha type-6-like isoform 1 [Saimiri boliviensis boliviensis]
ENSRNOG00000007235	Atp5g1	1.66884	0.841727	K02128|1|2e-47|188|rno:29754|F-type H+-transporting ATPase subunit c [EC:3.6.3.14]	GO:0005753//mitochondrial proton-transporting ATP synthase complex;GO:0033177//proton-transporting two-sector ATPase complex, proton-transporting domain	GO:0015078//hydrogen ion transmembrane transporter activity	GO:0046034//ATP metabolic process;GO:0034220//ion transmembrane transport;GO:0015992//proton transport;GO:0010033//response to organic substance	gi|74204278|dbj|BAE39897.1|/1.74452e-46/unnamed protein product [Mus musculus]
ENSRNOG00000009980	Ppap2a	-2.20775	0.805975	K01080|1|2e-154|545|rno:64369|phosphatidate phosphatase [EC:3.1.3.4]	GO:0016021//integral to membrane	GO:0016791//phosphatase activity	GO:0007276//gamete generation;GO:0006066//alcohol metabolic process;GO:0016311//dephosphorylation;GO:0007186//G-protein coupled receptor signaling pathway;GO:0030518//intracellular steroid hormone receptor signaling pathway;GO:0046519;GO:0046339//diacylglycerol metabolic process;GO:0008283//cell proliferation;GO:0006464//cellular protein modification process	gi|149059350|gb|EDM10357.1|/7.10273e-154/phosphatidic acid phosphatase 2a, isoform CRA_a [Rattus norvegicus]
ENSRNOG00000019459	Oaz1	2.60054	0.868118	K12752|1|4e-15|82.8|ame:551149|myosin light chain, invertebrate	GO:0044444//cytoplasmic part	GO:0005488//binding;GO:0004857//enzyme inhibitor activity	GO:0019222//regulation of metabolic process;GO:0006595//polyamine metabolic process;GO:0006520//cellular amino acid metabolic process	gi|23397676|ref|NP_620781.1|/2.29702e-129/ornithine decarboxylase antizyme 1 [Rattus norvegicus]
ENSRNOG00000005355	Ncstn	3.02269	0.832513	K06171|1|0.0|1380|rno:289231|nicastrin	GO:0005764//lysosome;GO:0016021//integral to membrane;GO:0048770	GO:0005488//binding;GO:0016787//hydrolase activity	GO:0006917//induction of apoptosis;GO:0044267//cellular protein metabolic process;GO:0006516//glycoprotein catabolic process;GO:0007169//transmembrane receptor protein tyrosine kinase signaling pathway;GO:0051604//protein maturation;GO:0044093;GO:0033619//membrane protein proteolysis	gi|27819651|ref|NP_777353.1|/0/nicastrin precursor [Rattus norvegicus]
ENSRNOG00000011413	Scp2	3.6922	0.895067	K08764|1|0.0|1043|rno:25541|sterol carrier protein 2 [EC:2.3.1.176]	GO:0031981//nuclear lumen;GO:0044439	GO:0005496//steroid binding;GO:0016408	GO:0006996//organelle organization;GO:0006732//coenzyme metabolic process;GO:0006635//fatty acid beta-oxidation;GO:0010876;GO:0051234//establishment of localization;GO:0006694//steroid biosynthetic process	gi|202553|gb|AAA40622.1|/0/60 kDa protein [Rattus norvegicus]
ENSRNOG00000000511	Srpk1	3.75419	0.867361	K15409|1|0.0|1161|rno:361811|serine/threonine-protein kinase SRPK1 [EC:2.7.11.1]	GO:0043231//intracellular membrane-bounded organelle	GO:0004672//protein kinase activity;GO:0046872//metal ion binding;GO:0032559	GO:0048869//cellular developmental process;GO:0006396//RNA processing;GO:0035556//intracellular signal transduction;GO:0006796//phosphate-containing compound metabolic process;GO:0051704;GO:0010468//regulation of gene expression;GO:0006464//cellular protein modification process	gi|71043650|ref|NP_001020897.1|/0/serine/threonine-protein kinase SRPK1 [Rattus norvegicus]
ENSRNOG00000019730	Inppl1	3.87963	0.878248	K15909|1|0.0|1940|rno:65038|phosphatidylinositol-3,4,5-trisphosphate 5-phosphatase 2 [EC:3.1.3.86]	GO:0016020//membrane;GO:0031252//cell leading edge;GO:0030864//cortical actin cytoskeleton	GO:0046030//inositol trisphosphate phosphatase activity;GO:0035091//phosphatidylinositol binding;GO:0008092//cytoskeletal protein binding;GO:0019904//protein domain specific binding	GO:0007417//central nervous system development;GO:0010467//gene expression;GO:0043647//inositol phosphate metabolic process;GO:0009968//negative regulation of signal transduction;GO:0008283//cell proliferation;GO:0010975//regulation of neuron projection development;GO:0030036//actin cytoskeleton organization;GO:0016192//vesicle-mediated transport;GO:0043434//response to peptide hormone stimulus;G…	gi|12621112|ref|NP_075233.1|/0/phosphatidylinositol 3,4,5-trisphosphate 5-phosphatase 2 isoform 1 [Rattus norvegicus]
ENSRNOG00000021265	Cds2	3.55784	0.878111	K00981|1|0.0|882|rno:114101|phosphatidate cytidylyltransferase [EC:2.7.7.41]	GO:0019866//organelle inner membrane;GO:0043231//intracellular membrane-bounded organelle;GO:0031224//intrinsic to membrane	GO:0070567	GO:0006644//phospholipid metabolic process	gi|149023367|gb|EDL80261.1|/0/CDP-diacylglycerol synthase (phosphatidate cytidylyltransferase) 2 [Rattus norvegicus]
ENSRNOG00000018937	Gstm7	1.71505	0.813927	K00799|1|1e-126|453|rno:81869|glutathione S-transferase [EC:2.5.1.18]	GO:0044424//intracellular part	GO:0016765//transferase activity, transferring alkyl or aryl (other than methyl) groups	GO:0006790//sulfur compound metabolic process;GO:0006805//xenobiotic metabolic process	gi|13592152|ref|NP_112416.1|/1.19451e-125/glutathione S-transferase Yb-3 [Rattus norvegicus]
ENSRNOG00000011238	Tiparp	-2.8171	0.813622	K15259|1|0.0|1351|mmu:99929|poly [ADP-ribose] polymerase 7/11/12/13 [EC:2.4.2.30]	-	GO:0016763//transferase activity, transferring pentosyl groups;GO:0046914//transition metal ion binding	GO:0009887//organ morphogenesis;GO:0007169//transmembrane receptor protein tyrosine kinase signaling pathway;GO:0048534;GO:0030154//cell differentiation;GO:0060537//muscle tissue development;GO:0008202//steroid metabolic process;GO:0008406//gonad development;GO:0006464//cellular protein modification process	gi|392338823|ref|XP_003753644.1|/0/PREDICTED: TCDD-inducible poly [ADP-ribose] polymerase [Rattus norvegicus]
ENSRNOG00000002352	Tsen15	-2.08069	0.832513	K15324|1|5e-63|241|rno:289083|tRNA-splicing endonuclease subunit Sen15	GO:0031981//nuclear lumen	GO:0004518//nuclease activity	GO:0006399//tRNA metabolic process;GO:0006396//RNA processing	gi|157786992|ref|NP_001099428.1|/3.76383e-62/tRNA-splicing endonuclease subunit Sen15 [Rattus norvegicus]
ENSRNOG00000016781	Ppib	3.84723	0.889765	K03768|1|4e-109|395|mmu:19035|peptidyl-prolyl cis-trans isomerase B (cyclophilin B) [EC:5.2.1.8]	GO:0044432//endoplasmic reticulum part;GO:0048770	GO:0016859//cis-trans isomerase activity;GO:0005515//protein binding	GO:0046907//intracellular transport;GO:0044267//cellular protein metabolic process	gi|215274190|sp|P24368.3|PPIB_RAT/3.23889e-112/RecName: Full=Peptidyl-prolyl cis-trans isomerase B; Short=PPIase B; AltName: Full=CYP-S1; AltName: Full=Cyclophilin B; AltName: Full=Rotamase B; AltName: Full=S-cyclophilin; Short=SCYLP; Flags: Precursor
ENSRNOG00000040040	Ndufaf6	-2.31253	0.821121	-	GO:0043231//intracellular membrane-bounded organelle	GO:0003824//catalytic activity	GO:0008152//metabolic process	gi|451172113|ref|NP_001263370.1|/0/NADH dehydrogenase (ubiquinone) complex I, assembly factor 6 precursor [Rattus norvegicus]
ENSRNOG00000026905	Ppm1g	3.39147	0.872	K01090|1|0.0|937|rno:259229|protein phosphatase [EC:3.1.3.16]	GO:0043234//protein complex;GO:0043231//intracellular membrane-bounded organelle	GO:0043169//cation binding;GO:0004721//phosphoprotein phosphatase activity	GO:0006464//cellular protein modification process;GO:0006796//phosphate-containing compound metabolic process;GO:0022402//cell cycle process	gi|22219444|ref|NP_671742.1|/0/protein phosphatase 1G [Rattus norvegicus]
ENSRNOG00000047246	Chtf8	-2.24754	0.813811	K11270|1|2e-63|244|rno:364996|chromosome transmission fidelity protein 8	GO:0043231//intracellular membrane-bounded organelle	-	GO:0006259//DNA metabolic process	gi|298351630|sp|B2RYL1.1|CTF8A_RAT/0/RecName: Full=Chromosome transmission fidelity protein 8 homolog isoform 2
ENSRNOG00000016460	Clu	-3.8659	0.908215	-	GO:0030427//site of polarized growth;GO:0016234//inclusion body;GO:0034364//high-density lipoprotein particle;GO:0031091//platelet alpha granule;GO:0042995//cell projection	GO:0005515//protein binding	GO:0070848//response to growth factor stimulus;GO:0008637//apoptotic mitochondrial changes;GO:0007599//hemostasis;GO:0031016//pancreas development;GO:0051707//response to other organism;GO:0002455//humoral immune response mediated by circulating immunoglobulin;GO:0008283//cell proliferation;GO:0006887//exocytosis;GO:0032460//negative regulation of protein oligomerization;GO:0030301//cholesterol t…	gi|149030313|gb|EDL85369.1|/0/clusterin, isoform CRA_a [Rattus norvegicus]
ENSRNOG00000010239	Cnbp	3.58359	0.896424	K09250|1|1e-101|370|mdo:100028365|cellular nucleic acid-binding protein	GO:0043231//intracellular membrane-bounded organelle;GO:0044444//cytoplasmic part	GO:0003723//RNA binding;GO:0046914//transition metal ion binding;GO:0001071//nucleic acid binding transcription factor activity;GO:0043566//structure-specific DNA binding	GO:0006357//regulation of transcription from RNA polymerase II promoter;GO:0008283//cell proliferation;GO:0008203//cholesterol metabolic process	gi|148666815|gb|EDK99231.1|/1.14028e-113/cellular nucleic acid binding protein, isoform CRA_d [Mus musculus]
ENSRNOG00000018345	Abce1	2.83705	0.857095	K06174|1|0.0|1129|rno:361390|ATP-binding cassette, sub-family E, member 1	GO:0043231//intracellular membrane-bounded organelle	GO:0017111//nucleoside-triphosphatase activity;GO:0004857//enzyme inhibitor activity;GO:0051540;GO:0032559	GO:0051707//response to other organism;GO:0016070//RNA metabolic process;GO:0009207	gi|431918297|gb|ELK17524.1|/0/ATP-binding cassette sub-family E member 1 [Pteropus alecto]
ENSRNOG00000003177	Mat2b	3.39901	0.872	K00789|1|0.0|673|rno:683630|S-adenosylmethionine synthetase [EC:2.5.1.6]	GO:0043231//intracellular membrane-bounded organelle;GO:0043234//protein complex;GO:0044444//cytoplasmic part	GO:0005488//binding;GO:0016616//oxidoreductase activity, acting on the CH-OH group of donors, NAD or NADP as acceptor;GO:0030234//enzyme regulator activity	GO:0009108//coenzyme biosynthetic process;GO:0019222//regulation of metabolic process;GO:0006730//one-carbon metabolic process;GO:0033692//cellular polysaccharide biosynthetic process	gi|112983992|ref|NP_001037747.1|/0/methionine adenosyltransferase 2 subunit beta [Rattus norvegicus]
ENSRNOG00000013360	Prkcsh	3.77077	0.884706	K08288|1|0.0|823|rno:300445|protein kinase C substrate 80K-H	GO:0044432//endoplasmic reticulum part;GO:0043234//protein complex;GO:0016020//membrane	GO:0016772//transferase activity, transferring phosphorus-containing groups;GO:0003676//nucleic acid binding;GO:0046872//metal ion binding;GO:0019901//protein kinase binding	GO:0006952//defense response;GO:0035556//intracellular signal transduction;GO:0051259//protein oligomerization;GO:0006796//phosphate-containing compound metabolic process;GO:0006487//protein N-linked glycosylation	gi|157818781|ref|NP_001100276.1|/0/glucosidase 2 subunit beta precursor [Rattus norvegicus]
ENSRNOG00000009963	Ctps1	2.45167	0.847575	K01937|1|0.0|1088|rno:313560|CTP synthase [EC:6.3.4.2]	GO:0044444//cytoplasmic part	GO:0016879//ligase activity, forming carbon-nitrogen bonds;GO:0032559	GO:0009209;GO:0009064//glutamine family amino acid metabolic process;GO:0042221//response to chemical stimulus	gi|199560247|ref|NP_001128345.1|/0/CTP synthase 1 [Rattus norvegicus]
ENSRNOG00000047052	Clpp	-2.44292	0.853255	K01358|1|1e-123|443|rno:301117|ATP-dependent Clp protease, protease subunit [EC:3.4.21.92]	GO:0044429//mitochondrial part	GO:0004175//endopeptidase activity;GO:0005515//protein binding;GO:0032559	GO:0019538//protein metabolic process;GO:0051259//protein oligomerization	gi|149028159|gb|EDL83597.1|/8.6049e-123/similar to Putative ATP-dependent Clp protease proteolytic subunit, mitochondrial precursor (Endopeptidase Clp) [Rattus norvegicus]
ENSRNOG00000013254	Dctn6	-1.71489	0.830946	K10428|1|1e-97|357|rno:290798|dynactin 6	GO:0005875//microtubule associated complex;GO:0043231//intracellular membrane-bounded organelle	GO:0005515//protein binding;GO:0003824//catalytic activity	GO:0006629//lipid metabolic process;GO:0006996//organelle organization	gi|157823924|ref|NP_001099555.1|/8.11018e-97/dynactin subunit 6 [Rattus norvegicus]
ENSRNOG00000012084	Xpnpep1	3.68232	0.870085	K01262|1|0.0|1305|mcc:696570|Xaa-Pro aminopeptidase [EC:3.4.11.9]	GO:0044444//cytoplasmic part	GO:0042802//identical protein binding;GO:0046914//transition metal ion binding;GO:0004177//aminopeptidase activity;GO:0008237//metallopeptidase activity	GO:0019538//protein metabolic process;GO:0043171//peptide catabolic process	gi|149040371|gb|EDL94409.1|/0/X-prolyl aminopeptidase (aminopeptidase P) 1, soluble, isoform CRA_a [Rattus norvegicus]
ENSRNOG00000006593	Grpel1	3.90583	0.899569	K03687|1|1e-99|364|rno:79563|molecular chaperone GrpE	GO:0044429//mitochondrial part	GO:0030554//adenyl nucleotide binding;GO:0042802//identical protein binding	GO:0044267//cellular protein metabolic process;GO:0019222//regulation of metabolic process;GO:0006626//protein targeting to mitochondrion	gi|13324704|ref|NP_077813.1|/7.67987e-99/grpE protein homolog 1, mitochondrial precursor [Rattus norvegicus]
ENSRNOG00000018569	Ahcyl1	-2.45189	0.837341	K01251|1|0.0|858|rno:362013|adenosylhomocysteinase [EC:3.3.1.1]	-	GO:0016802	GO:0044237//cellular metabolic process	gi|157819079|ref|NP_001102031.1|/0/putative adenosylhomocysteinase 2 [Rattus norvegicus]
ENSRNOG00000016496	Ctsc	3.22864	0.857905	K01275|1|0.0|959|rno:25423|cathepsin C [EC:3.4.14.1]	GO:0000323//lytic vacuole	GO:0004175//endopeptidase activity;GO:0005515//protein binding;GO:0043168	GO:0019538//protein metabolic process;GO:0032502//developmental process;GO:0002376//immune system process;GO:0042221//response to chemical stimulus	gi|8393218|ref|NP_058793.1|/0/dipeptidyl peptidase 1 precursor [Rattus norvegicus]
ENSRNOG00000016416	Rnh1	-2.6281	0.858599	K12800|1|6e-65|249|acs:100552241|NACHT, LRR and PYD domains-containing protein 3	GO:0043234//protein complex;GO:0044424//intracellular part	GO:0005488//binding;GO:0004857//enzyme inhibitor activity	GO:0006401//RNA catabolic process;GO:0019222//regulation of metabolic process;GO:0022603//regulation of anatomical structure morphogenesis	gi|398303848|ref|NP_001257691.1|/0/ribonuclease inhibitor isoform a [Rattus norvegicus]
ENSRNOG00000000558	Ppa1	-2.2359	0.847533	K01507|1|3e-175|615|rno:294504|inorganic pyrophosphatase [EC:3.6.1.1]	GO:0044444//cytoplasmic part	GO:0046872//metal ion binding;GO:0016462//pyrophosphatase activity	GO:0006412//translation;GO:0006796//phosphate-containing compound metabolic process	gi|71122474|gb|AAH99794.1|/0/Ppa1 protein [Rattus norvegicus]
ENSRNOG00000024602	Plekha7	4.02527	0.84686	K06082|1|4e-07|56.2|dre:567490|FERM, RhoGEF and pleckstrin domain protein 2;K03426|5|2e-06|53.9|ssc:100512459|NAD+ diphosphatase [EC:3.6.1.22]	GO:0005815//microtubule organizing center;GO:0005913//cell-cell adherens junction	GO:0005515//protein binding	GO:0016337//cell-cell adhesion;GO:0045217//cell-cell junction maintenance	gi|221554497|ref|NP_001138333.1|/1.11715e-151/pleckstrin homology domain containing, family A member 7 [Rattus norvegicus]
ENSRNOG00000007316	Idh3B	-2.86839	0.874408	K00030|1|0.0|709|rno:94173|isocitrate dehydrogenase (NAD+) [EC:1.1.1.41]	GO:0030062//mitochondrial tricarboxylic acid cycle enzyme complex	GO:0046872//metal ion binding;GO:0004448//isocitrate dehydrogenase activity;GO:0000166//nucleotide binding	GO:0043648//dicarboxylic acid metabolic process;GO:0019674//NAD metabolic process;GO:0009060//aerobic respiration	gi|55926203|ref|NP_446033.1|/0/isocitrate dehydrogenase [NAD] subunit beta, mitochondrial precursor [Rattus norvegicus]
ENSRNOG00000039091	Pnpla8	3.82486	0.886484	K01047|1|3e-24|115|ame:410570|phospholipase A2 [EC:3.1.1.4]	GO:0031224//intrinsic to membrane;GO:0031090//organelle membrane;GO:0012505//endomembrane system;GO:0044439	GO:0004623//phospholipase A2 activity;GO:0032559	GO:0006629//lipid metabolic process;GO:0032787//monocarboxylic acid metabolic process	gi|392340992|ref|XP_003754218.1|/0/PREDICTED: calcium-independent phospholipase A2-gamma [Rattus norvegicus]
ENSRNOG00000021138	Cers2	-2.28829	0.812107	K04710|1|0.0|731|rno:310667|ceramide synthetase [EC:2.3.1.24]	GO:0031224//intrinsic to membrane;GO:0031090//organelle membrane;GO:0005635//nuclear envelope	GO:0001071//nucleic acid binding transcription factor activity;GO:0003677//DNA binding;GO:0016410//N-acyltransferase activity	GO:0006672//ceramide metabolic process;GO:0006351//transcription, DNA-dependent	gi|195976786|ref|NP_001028872.2|/0/LAG1 homolog, ceramide synthase 2 [Rattus norvegicus]
ENSRNOG00000012067	Fam111a	3.48376	0.879342	-	-	GO:0004175//endopeptidase activity	GO:0019538//protein metabolic process	gi|157821173|ref|NP_001102633.1|/0/uncharacterized protein LOC499322 [Rattus norvegicus]
ENSRNOG00000014097	Psmd7	-2.65814	0.866067	K03038|1|2e-145|516|rno:307821|26S proteasome regulatory subunit N8	GO:0022624//proteasome accessory complex	GO:0005488//binding	GO:0043161//proteasomal ubiquitin-dependent protein catabolic process;GO:0051320//S phase;GO:0007050//cell cycle arrest;GO:0016070//RNA metabolic process;GO:0051439//regulation of ubiquitin-protein ligase activity involved in mitotic cell cycle;GO:0006520//cellular amino acid metabolic process;GO:0006915//apoptotic process;GO:0030330//DNA damage response, signal transduction by p53 class mediator	gi|157818107|ref|NP_001100896.1|/1.55956e-144/26S proteasome non-ATPase regulatory subunit 7 [Rattus norvegicus]
ENSRNOG00000025701	Mki67ip	3.52987	0.881056	K14838|1|6e-138|491|rno:246042|nucleolar protein 15	GO:0000228//nuclear chromosome	GO:0003676//nucleic acid binding	GO:0016070//RNA metabolic process	gi|144226217|ref|NP_631925.2|/4.82641e-137/MKI67 FHA domain-interacting nucleolar phosphoprotein [Rattus norvegicus]
ENSRNOG00000014178	Acad9	3.92054	0.886778	K15980|1|0.0|1195|rno:294973|Acyl-CoA dehydrogenase family member 9 [EC:1.3.99.-]	GO:0043231//intracellular membrane-bounded organelle	GO:0016627//oxidoreductase activity, acting on the CH-CH group of donors;GO:0050662//coenzyme binding	GO:0008152//metabolic process	gi|197313734|ref|NP_861433.2|/0/acyl-CoA dehydrogenase family member 9, mitochondrial [Rattus norvegicus]
ENSRNOG00000005357	Ctc1	3.65813	0.827285	-	GO:0000783//nuclear telomere cap complex	GO:0043566//structure-specific DNA binding	GO:0006259//DNA metabolic process	gi|157822211|ref|NP_001100480.1|/0/CST complex subunit CTC1 [Rattus norvegicus]
ENSRNOG00000020385	Fads3	3.77641	0.87323	K10225|1|0.0|863|rno:286922|fatty acid desaturase 3 (delta-6 desaturase) [EC:1.14.19.-]	GO:0031090//organelle membrane;GO:0043231//intracellular membrane-bounded organelle;GO:0031224//intrinsic to membrane	GO:0005506//iron ion binding;GO:0016705//oxidoreductase activity, acting on paired donors, with incorporation or reduction of molecular oxygen	GO:0051234//establishment of localization;GO:0006631//fatty acid metabolic process;GO:0006091//generation of precursor metabolites and energy	gi|74181920|dbj|BAE32659.1|/0/unnamed protein product [Mus musculus]
ENSRNOG00000002983	Nfix	3.45541	0.854413	K09171|1|0.0|838|rno:81524|nuclear factor I/X	GO:0043231//intracellular membrane-bounded organelle	GO:0003676//nucleic acid binding;GO:0000981//sequence-specific DNA binding RNA polymerase II transcription factor activity	GO:0006259//DNA metabolic process;GO:0000122//negative regulation of transcription from RNA polymerase II promoter	gi|56549649|ref|NP_002492.2|/0/nuclear factor 1 X-type isoform 2 [Homo sapiens]
ENSRNOG00000007939	Naprt1	3.43561	0.840654	K00763|1|0.0|988|rno:315085|nicotinate phosphoribosyltransferase [EC:2.4.2.11]	GO:0043231//intracellular membrane-bounded organelle;GO:0044444//cytoplasmic part	GO:0016763//transferase activity, transferring pentosyl groups	GO:0019357//nicotinate nucleotide biosynthetic process;GO:0019359;GO:0006950//response to stress;GO:0009820//alkaloid metabolic process	gi|149066174|gb|EDM16047.1|/0/nicotinate phosphoribosyltransferase domain containing 1, isoform CRA_c [Rattus norvegicus]
ENSRNOG00000020941	Psenen	-2.3557	0.859283	K06170|1|1e-56|218|rno:292788|presenilin enhancer 2	GO:0016021//integral to membrane;GO:0000139//Golgi membrane	GO:0005488//binding;GO:0004175//endopeptidase activity	GO:0006917//induction of apoptosis;GO:0044267//cellular protein metabolic process;GO:0006516//glycoprotein catabolic process;GO:0007169//transmembrane receptor protein tyrosine kinase signaling pathway;GO:0051604//protein maturation;GO:0044093;GO:0043066//negative regulation of apoptotic process;GO:0033619//membrane protein proteolysis	gi|410983281|ref|XP_003997969.1|/4.45701e-58/PREDICTED: gamma-secretase subunit PEN-2 [Felis catus]
ENSRNOG00000001142	Prkab1	3.076	0.848385	K07199|1|1e-148|527|rno:83803|5'-AMP-activated protein kinase, regulatory beta subunit	GO:0043231//intracellular membrane-bounded organelle;GO:0043234//protein complex;GO:0044444//cytoplasmic part	GO:0004674//protein serine/threonine kinase activity;GO:0019900//kinase binding	GO:0022402//cell cycle process;GO:0051259//protein oligomerization;GO:0006796//phosphate-containing compound metabolic process;GO:0007169//transmembrane receptor protein tyrosine kinase signaling pathway;GO:0019217//regulation of fatty acid metabolic process	gi|22096326|sp|P80386.4|AAKB1_RAT/1.37772e-148/RecName: Full=5'-AMP-activated protein kinase subunit beta-1; Short=AMPK subunit beta-1; Short=AMPKb; AltName: Full=5'-AMP-activated protein kinase 40 kDa subunit
ENSRNOG00000016356	Got1	3.94122	0.908247	K14454|1|0.0|835|rno:24401|aspartate aminotransferase, cytoplasmic [EC:2.6.1.1]	GO:0000323//lytic vacuole;GO:0033267//axon part	GO:0008483//transaminase activity;GO:0016831//carboxy-lyase activity;GO:0048037//cofactor binding	GO:0006103//2-oxoglutarate metabolic process;GO:0006071//glycerol metabolic process;GO:0009064//glutamine family amino acid metabolic process;GO:0031960//response to corticosteroid stimulus;GO:0032868//response to insulin stimulus;GO:0055088//lipid homeostasis;GO:0006531//aspartate metabolic process	gi|401461792|ref|NP_036703.2|/0/aspartate aminotransferase, cytoplasmic [Rattus norvegicus]
ENSRNOG00000005798	Cav3	3.64892	0.889208	K12959|1|5e-86|318|rno:29161|caveolin 3	GO:0031224//intrinsic to membrane;GO:0043234//protein complex;GO:0012505//endomembrane system;GO:0043231//intracellular membrane-bounded organelle;GO:0044459//plasma membrane part;GO:0042383//sarcolemma;GO:0045202//synapse;GO:0031674//I band	GO:0019899//enzyme binding;GO:0016247//channel regulator activity	GO:0032769//negative regulation of monooxygenase activity;GO:0006639//acylglycerol metabolic process;GO:0003009//skeletal muscle contraction;GO:0043405//regulation of MAP kinase activity;GO:0033673//negative regulation of kinase activity;GO:0007009//plasma membrane organization;GO:0055092//sterol homeostasis;GO:0055117//regulation of cardiac muscle contraction;GO:0048869//cellular developmental p…	gi|9506465|ref|NP_062028.1|/3.8724e-85/caveolin-3 [Rattus norvegicus]
ENSRNOG00000017352	Ctdnep1	-2.09372	0.83773	K15731|1|5e-32|139|aag:AaeL_AAEL003412|carboxy-terminal domain RNA polymerase II polypeptide A small phosphatase [EC:3.1.3.16]	GO:0005635//nuclear envelope;GO:0031090//organelle membrane;GO:0031224//intrinsic to membrane;GO:0044444//cytoplasmic part	GO:0004721//phosphoprotein phosphatase activity	GO:0048731;GO:0006464//cellular protein modification process;GO:0006997//nucleus organization;GO:0006796//phosphate-containing compound metabolic process;GO:0048869//cellular developmental process	gi|23956160|ref|NP_080293.1|/5.92675e-130/CTD nuclear envelope phosphatase 1 [Mus musculus]
ENSRNOG00000033915	Gpt	3.74123	0.853539	K00814|1|0.0|974|rno:81670|alanine transaminase [EC:2.6.1.2]	GO:0044444//cytoplasmic part	GO:0048037//cofactor binding;GO:0016846//carbon-sulfur lyase activity;GO:0047635	GO:0006006//glucose metabolic process;GO:0006520//cellular amino acid metabolic process	gi|13591961|ref|NP_112301.1|/0/alanine aminotransferase 1 [Rattus norvegicus]
ENSRNOG00000019303	Srpk3	-2.30745	0.820501	K08832|1|0.0|931|rno:293854|serine/threonine-protein kinase SRPK3 [EC:2.7.11.1]	-	GO:0004672//protein kinase activity;GO:0032559	GO:0014706//striated muscle tissue development;GO:0006464//cellular protein modification process;GO:0048513//organ development;GO:0006796//phosphate-containing compound metabolic process;GO:0048869//cellular developmental process	gi|34576547|ref|NP_908934.1|/0/serine/threonine-protein kinase SRPK3 [Rattus norvegicus]
ENSRNOG00000008103	Mdh1	4.84145	0.947649	K00025|1|2e-176|619|rno:24551|malate dehydrogenase [EC:1.1.1.37]	GO:0005815//microtubule organizing center;GO:0043231//intracellular membrane-bounded organelle	GO:0016615//malate dehydrogenase activity;GO:0000166//nucleotide binding	GO:0043648//dicarboxylic acid metabolic process;GO:0009060//aerobic respiration;GO:0019674//NAD metabolic process;GO:0006006//glucose metabolic process	gi|148675904|gb|EDL07851.1|/4.79918e-180/malate dehydrogenase 1, NAD (soluble), isoform CRA_c [Mus musculus]
ENSRNOG00000011404	Chkb	-2.15779	0.829904	K14156|1|0.0|756|rno:29367|choline/ethanolamine kinase [EC:2.7.1.32 2.7.1.82]	-	GO:0016301//kinase activity;GO:0032559	GO:0046335//ethanolamine biosynthetic process;GO:0006656//phosphatidylcholine biosynthetic process;GO:0048513//organ development;GO:0006796//phosphate-containing compound metabolic process	gi|8393104|ref|NP_058873.1|/0/choline/ethanolamine kinase [Rattus norvegicus]
ENSRNOG00000006589	Mif	2.0948	0.852382	K07253|1|2e-62|238|rno:81683|phenylpyruvate tautomerase [EC:5.3.2.1]	GO:0043231//intracellular membrane-bounded organelle;GO:0044421//extracellular region part	GO:0005102//receptor binding;GO:0016863//intramolecular oxidoreductase activity, transposing C=C bonds;GO:0016862//intramolecular oxidoreductase activity, interconverting keto- and enol-groups	GO:0010467//gene expression;GO:0001976//neurological system process involved in regulation of systemic arterial blood pressure;GO:0050707//regulation of cytokine secretion;GO:0034614//cellular response to reactive oxygen species;GO:0006915//apoptotic process;GO:0010737//protein kinase A signaling cascade;GO:0008284//positive regulation of cell proliferation;GO:0043434//response to peptide hormone…	gi|13591985|ref|NP_112313.1|/1.32091e-61/macrophage migration inhibitory factor [Rattus norvegicus]
ENSRNOG00000014613	Ddah1	2.89269	0.828011	K01482|1|3e-160|566|rno:64157|dimethylargininase [EC:3.5.3.18]	GO:0043231//intracellular membrane-bounded organelle	GO:0016813//hydrolase activity, acting on carbon-nitrogen (but not peptide) bonds, in linear amidines;GO:0046914//transition metal ion binding;GO:0031406//carboxylic acid binding	GO:0006575//cellular modified amino acid metabolic process;GO:0031328//positive regulation of cellular biosynthetic process;GO:0044271//cellular nitrogen compound biosynthetic process;GO:0007165//signal transduction;GO:0045765//regulation of angiogenesis;GO:0006525//arginine metabolic process;GO:0006464//cellular protein modification process	gi|11560131|ref|NP_071633.1|/2.50455e-159/N(G),N(G)-dimethylarginine dimethylaminohydrolase 1 [Rattus norvegicus]
ENSRNOG00000018531	Mrps11	-2.24229	0.823236	-	GO:0000314//organellar small ribosomal subunit;GO:0043231//intracellular membrane-bounded organelle	GO:0005198//structural molecule activity	GO:0010467//gene expression;GO:0006518//peptide metabolic process	gi|157820717|ref|NP_001102618.1|/8.92349e-89/28S ribosomal protein S11, mitochondrial [Rattus norvegicus]
ENSRNOG00000020853	Scap	3.62665	0.840696	K10260|1|4e-17|92.0|pon:100173626|F-box and WD-40 domain protein 7	GO:0032991//macromolecular complex;GO:0030134//ER to Golgi transport vesicle;GO:0031224//intrinsic to membrane;GO:0031090//organelle membrane;GO:0012505//endomembrane system	GO:0005515//protein binding;GO:0032934//sterol binding	GO:0016125//sterol metabolic process;GO:0006633//fatty acid biosynthetic process;GO:0043434//response to peptide hormone stimulus;GO:0010894//negative regulation of steroid biosynthetic process;GO:0010870//positive regulation of receptor biosynthetic process;GO:0032502//developmental process	gi|155369287|ref|NP_001094436.1|/0/sterol regulatory element-binding protein cleavage-activating protein [Rattus norvegicus]
ENSRNOG00000004500	Myc	-2.85821	0.864573	K04377|1|0.0|690|rno:24577|Myc proto-oncogene protein	GO:0043005//neuron projection;GO:0044451//nucleoplasm part;GO:0015630//microtubule cytoskeleton	GO:0001071//nucleic acid binding transcription factor activity;GO:0043566//structure-specific DNA binding;GO:0046983//protein dimerization activity	GO:0051704;GO:0002053//positive regulation of mesenchymal cell proliferation;GO:0044093;GO:0009628//response to abiotic stimulus;GO:0019318//hexose metabolic process;GO:0042471//ear morphogenesis;GO:0000737//DNA catabolic process, endonucleolytic;GO:0001783//B cell apoptotic process;GO:0050877//neurological system process;GO:0000723//telomere maintenance;GO:0043393//regulation of protein binding;…	gi|71834866|ref|NP_036735.2|/0/myc proto-oncogene protein [Rattus norvegicus]
ENSRNOG00000012693	Pmpcb	-2.38587	0.856958	K01412|1|0.0|956|rno:64198|mitochondrial processing peptidase [EC:3.4.24.64]	GO:0019866//organelle inner membrane;GO:0044429//mitochondrial part	GO:0004175//endopeptidase activity;GO:0046914//transition metal ion binding	GO:0006626//protein targeting to mitochondrion;GO:0019538//protein metabolic process	gi|122065519|sp|Q03346.3|MPPB_RAT/0/RecName: Full=Mitochondrial-processing peptidase subunit beta; AltName: Full=Beta-MPP; AltName: Full=P-52; Flags: Precursor
ENSRNOG00000017297	Cab39	3.3775	0.863164	K08272|1|7e-159|404|gga:424830|calcium binding protein 39	GO:0032991//macromolecular complex;GO:0044444//cytoplasmic part	GO:0004672//protein kinase activity;GO:0046872//metal ion binding;GO:0019899//enzyme binding	GO:0022402//cell cycle process;GO:0051259//protein oligomerization;GO:0007169//transmembrane receptor protein tyrosine kinase signaling pathway;GO:0019217//regulation of fatty acid metabolic process	gi|148708308|gb|EDL40255.1|/1.69465e-162/calcium binding protein 39, isoform CRA_b [Mus musculus]
ENSRNOG00000011603	Cab39l	-2.85281	0.834469	K08272|1|0.0|664|rno:290291|calcium binding protein 39	GO:0044444//cytoplasmic part	GO:0005488//binding	GO:0019217//regulation of fatty acid metabolic process;GO:0022402//cell cycle process;GO:0007169//transmembrane receptor protein tyrosine kinase signaling pathway	gi|58865404|ref|NP_001011917.1|/0/calcium-binding protein 39-like [Rattus norvegicus]
ENSRNOG00000012966	Acadl	4.87582	0.94908	K00255|1|0.0|832|rno:25287|long-chain-acyl-CoA dehydrogenase [EC:1.3.99.13]	GO:0005740//mitochondrial envelope	GO:0003997//acyl-CoA oxidase activity;GO:0050662//coenzyme binding;GO:0005504//fatty acid binding;GO:0003995//acyl-CoA dehydrogenase activity	GO:0006635//fatty acid beta-oxidation;GO:0001676//long-chain fatty acid metabolic process;GO:0031327;GO:0009437//carnitine metabolic process;GO:0008203//cholesterol metabolic process;GO:0006579//amino-acid betaine catabolic process;GO:0051260//protein homooligomerization;GO:0045922//negative regulation of fatty acid metabolic process;GO:0048871//multicellular organismal homeostasis	gi|6978431|ref|NP_036951.1|/0/long-chain specific acyl-CoA dehydrogenase, mitochondrial precursor [Rattus norvegicus]
ENSRNOG00000006126	Nup88	-2.33955	0.832166	K14318|1|0.0|1427|rno:113929|nuclear pore complex protein Nup88	GO:0031981//nuclear lumen;GO:0044444//cytoplasmic part;GO:0005635//nuclear envelope	GO:0022829//wide pore channel activity	GO:0044238//primary metabolic process;GO:0050658//RNA transport;GO:0015758//glucose transport	gi|16758978|ref|NP_446068.1|/0/nuclear pore complex protein Nup88 [Rattus norvegicus]
ENSRNOG00000003951	Psmc1	3.91016	0.903229	K03062|1|0.0|783|cfa:100688636|26S proteasome regulatory subunit T2	GO:0031981//nuclear lumen;GO:0043234//protein complex	GO:0017111//nucleoside-triphosphatase activity;GO:0032559	GO:0043161//proteasomal ubiquitin-dependent protein catabolic process;GO:0051320//S phase;GO:0007050//cell cycle arrest;GO:0016070//RNA metabolic process;GO:0009207;GO:0051439//regulation of ubiquitin-protein ligase activity involved in mitotic cell cycle;GO:0006520//cellular amino acid metabolic process;GO:0006915//apoptotic process;GO:0030330//DNA damage response, signal transduction by p53 cla…	gi|431839200|gb|ELK01127.1|/0/26S protease regulatory subunit 4 [Pteropus alecto]
ENSRNOG00000018487	Slc3a2	3.82416	0.895004	K06519|1|0.0|911|rno:50567|solute carrier family 3, member 2	GO:0031224//intrinsic to membrane;GO:0044459//plasma membrane part;GO:0048770	GO:0015081//sodium ion transmembrane transporter activity;GO:0015171//amino acid transmembrane transporter activity;GO:0043167//ion binding	GO:0015801//aromatic amino acid transport;GO:0015820//leucine transport;GO:0044238//primary metabolic process;GO:0040007//growth;GO:0002376//immune system process;GO:0006807//nitrogen compound metabolic process;GO:0007599//hemostasis;GO:0070838//divalent metal ion transport	gi|402743472|ref|NP_062156.2|/0/4F2 cell-surface antigen heavy chain isoform 1 [Rattus norvegicus]
ENSRNOG00000014915	Gsr	-2.14911	0.838025	K00383|1|0.0|830|mmu:14782|glutathione reductase (NADPH) [EC:1.8.1.7]	GO:0043231//intracellular membrane-bounded organelle;GO:0009986//cell surface;GO:0044444//cytoplasmic part	GO:0015038//glutathione disulfide oxidoreductase activity;GO:0042277//peptide binding;GO:0042802//identical protein binding;GO:0000166//nucleotide binding;GO:0050662//coenzyme binding	GO:0006790//sulfur compound metabolic process;GO:0019725//cellular homeostasis;GO:0048232//male gamete generation	gi|50402124|sp|P70619.2|GSHR_RAT/0/RecName: Full=Glutathione reductase; Short=GR; Short=GRase
ENSRNOG00000019773	Egln1	-1.96014	0.83591	K09592|1|2e-160|566|rno:308913|hypoxia-inducible factor prolyl hydroxylase [EC:1.14.11.-]	GO:0044444//cytoplasmic part	GO:0019842//vitamin binding;GO:0046914//transition metal ion binding;GO:0016706//oxidoreductase activity, acting on paired donors, with incorporation or reduction of molecular oxygen, 2-oxoglutarate as one donor, and incorporation of one atom each of oxygen into both donors;GO:0016701//oxidoreductase activity, acting on single donors with incorporation of molecular oxygen	GO:0033483;GO:0043392//negative regulation of DNA binding;GO:0008152//metabolic process;GO:0006950//response to stress	gi|392355113|ref|XP_002728657.2|/1.47217e-159/PREDICTED: egl nine homolog 1, partial [Rattus norvegicus]
ENSRNOG00000010458	PIK3CA	3.58963	0.83083	K00922|1|0.0|2162|rno:170911|phosphatidylinositol-4,5-bisphosphate 3-kinase [EC:2.7.1.153]	GO:0031252//cell leading edge;GO:0043234//protein complex;GO:0044444//cytoplasmic part	GO:0005515//protein binding;GO:0035004//phosphatidylinositol 3-kinase activity;GO:0032559	GO:0007243//intracellular protein kinase cascade;GO:0007599//hemostasis;GO:0048017//inositol lipid-mediated signaling;GO:0050851//antigen receptor-mediated signaling pathway;GO:0006796//phosphate-containing compound metabolic process;GO:0007169//transmembrane receptor protein tyrosine kinase signaling pathway;GO:0046488//phosphatidylinositol metabolic process;GO:0031294;GO:0019318//hexose metabol…	gi|282158067|ref|NP_596890.2|/0/phosphatidylinositol-4,5-bisphosphate 3-kinase catalytic subunit alpha isoform [Rattus norvegicus]
ENSRNOG00000019618	Hdac3	3.66642	0.85983	K11404|1|0.0|808|mmu:15183|histone deacetylase 3 [EC:3.5.1.98]	GO:0031981//nuclear lumen;GO:0044427//chromosomal part;GO:0005819//spindle	GO:0003712//transcription cofactor activity;GO:0003676//nucleic acid binding;GO:0017136//NAD-dependent histone deacetylase activity;GO:0019899//enzyme binding	GO:0000278//mitotic cell cycle;GO:0000122//negative regulation of transcription from RNA polymerase II promoter;GO:0042221//response to chemical stimulus;GO:0006476//protein deacetylation;GO:0043409//negative regulation of MAPK cascade;GO:0007051//spindle organization;GO:0010830//regulation of myotube differentiation;GO:0007169//transmembrane receptor protein tyrosine kinase signaling pathway;GO:…	gi|89257352|ref|NP_034541.2|/0/histone deacetylase 3 [Mus musculus]
ENSRNOG00000021678	Alkbh3	-2.28678	0.849742	K10860|1|3e-168|592|rno:362169|alpha-ketoglutarate-dependent dioxygenase alkB homolog 3 [EC:1.14.11.-]	GO:0031981//nuclear lumen	GO:0019842//vitamin binding;GO:0016706//oxidoreductase activity, acting on paired donors, with incorporation or reduction of molecular oxygen, 2-oxoglutarate as one donor, and incorporation of one atom each of oxygen into both donors;GO:0016701//oxidoreductase activity, acting on single donors with incorporation of molecular oxygen;GO:0003677//DNA binding;GO:0004518//nuclease activity;GO:0005506/…	GO:0006281//DNA repair;GO:0035511//oxidative DNA demethylation	gi|62079085|ref|NP_001014202.1|/2.13671e-167/alpha-ketoglutarate-dependent dioxygenase alkB homolog 3 [Rattus norvegicus]
ENSRNOG00000003343	Canx	3.55078	0.889292	K08054|1|0.0|1023|rno:29144|calnexin	GO:0031224//intrinsic to membrane;GO:0044432//endoplasmic reticulum part;GO:0030425//dendrite;GO:0044297//cell body;GO:0031090//organelle membrane;GO:0030529//ribonucleoprotein complex;GO:0048770	GO:0046872//metal ion binding;GO:0035254//glutamate receptor binding;GO:0030246//carbohydrate binding	GO:0044267//cellular protein metabolic process;GO:0032502//developmental process	gi|25282419|ref|NP_742005.1|/0/calnexin precursor [Rattus norvegicus]
ENSRNOG00000019525	Hspa9	-1.95405	0.851257	K04043|1|0.0|1184|rno:291671|molecular chaperone DnaK	GO:0005759//mitochondrial matrix	GO:0005515//protein binding;GO:0032559	GO:0044267//cellular protein metabolic process;GO:0006605//protein targeting;GO:0043066//negative regulation of apoptotic process	gi|410110929|ref|NP_001094128.2|/0/stress-70 protein, mitochondrial [Rattus norvegicus]
ENSRNOG00000006364	Dld	2.29315	0.85638	K00382|1|0.0|1014|rno:298942|dihydrolipoamide dehydrogenase [EC:1.8.1.4]	GO:0001669//acrosomal vesicle;GO:0043234//protein complex;GO:0042995//cell projection;GO:0044429//mitochondrial part	GO:0000166//nucleotide binding;GO:0031405//lipoic acid binding;GO:0016668//oxidoreductase activity, acting on a sulfur group of donors, NAD or NADP as acceptor	GO:0006086//acetyl-CoA biosynthetic process from pyruvate;GO:0043648//dicarboxylic acid metabolic process;GO:0043603//cellular amide metabolic process;GO:0003006//developmental process involved in reproduction;GO:0009063//cellular amino acid catabolic process;GO:0006790//sulfur compound metabolic process;GO:0009060//aerobic respiration;GO:0006873//cellular ion homeostasis;GO:0048598//embryonic mo…	gi|40786469|ref|NP_955417.1|/0/dihydrolipoyl dehydrogenase, mitochondrial precursor [Rattus norvegicus]
ENSRNOG00000018598	Ankrd1	-3.91735	0.910687	K15504|1|7e-22|106|bta:521057|serine/threonine-protein phosphatase 6 regulatory ankyrin repeat subunit C	GO:0043231//intracellular membrane-bounded organelle;GO:0043234//protein complex;GO:0030017//sarcomere	GO:0003712//transcription cofactor activity;GO:0003676//nucleic acid binding	GO:0006629//lipid metabolic process;GO:0006355//regulation of transcription, DNA-dependent;GO:0023052//signaling;GO:0006950//response to stress	gi|81901720|sp|Q8R560.1|ANKR1_RAT/3.54385e-161/RecName: Full=Ankyrin repeat domain-containing protein 1; AltName: Full=Cardiac adriamycin-responsive protein; AltName: Full=Cardiac ankyrin repeat protein
ENSRNOG00000009421	Ivd	-2.47749	0.849038	K00253|1|0.0|847|rno:24513|isovaleryl-CoA dehydrogenase [EC:1.3.8.4]	GO:0005740//mitochondrial envelope	GO:0003995//acyl-CoA dehydrogenase activity;GO:0050662//coenzyme binding	GO:0006551//leucine metabolic process;GO:0051259//protein oligomerization;GO:0006635//fatty acid beta-oxidation;GO:0009063//cellular amino acid catabolic process	gi|6981112|ref|NP_036724.1|/0/isovaleryl-CoA dehydrogenase, mitochondrial precursor [Rattus norvegicus]
ENSRNOG00000027891	Dhrs11	-2.27715	0.835553	K11147|1|2e-24|114|cqu:CpipJ_CPIJ011391|dehydrogenase/reductase SDR family member 4 [EC:1.1.-.-];K16066|2|2e-23|110|api:100162592|malonic semialdehyde reductase [EC:1.1.1.-]	-	GO:0003824//catalytic activity	GO:0008152//metabolic process	gi|347800650|ref|NP_001014141.2|/1.42494e-146/dehydrogenase/reductase (SDR family) member 11 [Rattus norvegicus]
ENSRNOG00000005569	Phospho1	3.13269	0.878332	K06124|1|3e-153|542|rno:287644|phosphoethanolamine/phosphocholine phosphatase [EC:3.1.3.75]	-	GO:0016791//phosphatase activity;GO:0043169//cation binding	GO:0006796//phosphate-containing compound metabolic process	gi|157786864|ref|NP_001099303.1|/2.71421e-152/phosphoethanolamine/phosphocholine phosphatase [Rattus norvegicus]
ENSRNOG00000017286	Ephx2	-2.36243	0.826991	K08726|1|0.0|1087|rno:65030|soluble epoxide hydrolase [EC:3.3.2.10]	GO:0031981//nuclear lumen;GO:0042579//microbody;GO:0005924//cell-substrate adherens junction	GO:0046872//metal ion binding;GO:0042802//identical protein binding;GO:0016791//phosphatase activity;GO:0016803	GO:0007600//sensory perception;GO:0002538;GO:0006796//phosphate-containing compound metabolic process;GO:0008217//regulation of blood pressure;GO:0006875//cellular metal ion homeostasis;GO:0042221//response to chemical stimulus;GO:0006725//cellular aromatic compound metabolic process;GO:0001676//long-chain fatty acid metabolic process;GO:0042311//vasodilation	gi|55716049|gb|AAH85732.1|/0/Epoxide hydrolase 2, cytoplasmic [Rattus norvegicus]
ENSRNOG00000019048	Sod2	4.22711	0.92048	K04564|1|4e-110|399|rno:24787|superoxide dismutase, Fe-Mn family [EC:1.15.1.1]	GO:0005759//mitochondrial matrix;GO:0019866//organelle inner membrane	GO:0016209//antioxidant activity;GO:0003824//catalytic activity;GO:0005515//protein binding;GO:0003676//nucleic acid binding;GO:0046914//transition metal ion binding	GO:0033483;GO:0048468//cell development;GO:0048534;GO:0050954//sensory perception of mechanical stimulus;GO:0042391//regulation of membrane potential;GO:0055080//cation homeostasis;GO:0050931//pigment cell differentiation;GO:0022900//electron transport chain;GO:0045471//response to ethanol;GO:0031328//positive regulation of cellular biosynthetic process;GO:0051260//protein homooligomerization;GO:…	gi|8394331|ref|NP_058747.1|/2.95498e-109/superoxide dismutase [Mn], mitochondrial precursor [Rattus norvegicus]
ENSRNOG00000022586	Cdk9	-2.69597	0.846692	K02211|1|0.0|755|rno:362110|cyclin-dependent kinase 9 [EC:2.7.11.22 2.7.11.23]	GO:0008023//transcription elongation factor complex	GO:0003723//RNA binding;GO:0004674//protein serine/threonine kinase activity;GO:0043565//sequence-specific DNA binding;GO:0032559	GO:0006796//phosphate-containing compound metabolic process;GO:0006352//DNA-dependent transcription, initiation;GO:0045935;GO:0006354//DNA-dependent transcription, elongation;GO:0006464//cellular protein modification process	gi|440894652|gb|ELR47052.1|/0/Cell division protein kinase 9, partial [Bos grunniens mutus]
ENSRNOG00000014436	Ppip5k1	3.85129	0.878279	K13024|1|0.0|2728|rno:311355|inositol hexakisphosphate/diphosphoinositol-pentakisphosphate kinase [EC:2.7.4.21 2.7.4.24]	GO:0044444//cytoplasmic part	GO:0016791//phosphatase activity;GO:0000828//inositol hexakisphosphate kinase activity;GO:0032559	GO:0019751//polyol metabolic process;GO:0006796//phosphate-containing compound metabolic process	gi|124244050|ref|NP_001074252.1|/0/inositol hexakisphosphate and diphosphoinositol-pentakisphosphate kinase 1 [Rattus norvegicus]
ENSRNOG00000015807	Pyroxd2	-2.32591	0.807384	-	-	GO:0003824//catalytic activity	GO:0008152//metabolic process	gi|51948490|ref|NP_001004261.1|/0/pyridine nucleotide-disulfide oxidoreductase domain-containing protein 2 [Rattus norvegicus]
ENSRNOG00000011509	Agk	3.6445	0.845808	K09881|1|0.0|850|rno:502749|acylglycerol kinase [EC:2.7.1.94]	GO:0005740//mitochondrial envelope	GO:0001727//lipid kinase activity;GO:0032559	GO:0007186//G-protein coupled receptor signaling pathway;GO:0016310//phosphorylation;GO:0006672//ceramide metabolic process	gi|188595700|ref|NP_001120969.1|/0/acylglycerol kinase, mitochondrial [Rattus norvegicus]
ENSRNOG00000021295	Rae1	3.01258	0.81866	K14298|1|0.0|733|rno:362281|mRNA export factor	GO:0031965//nuclear membrane;GO:0043232	GO:0003676//nucleic acid binding;GO:0015631//tubulin binding	GO:0044238//primary metabolic process;GO:0015758//glucose transport;GO:0006405//RNA export from nucleus;GO:0014070//response to organic cyclic compound	gi|76096356|ref|NP_001028880.1|/0/mRNA export factor [Rattus norvegicus]
ENSRNOG00000014204	Pacsin3	3.4963	0.881708	K10408|1|5e-78|292|tca:664324|dynein heavy chain, axonemal;K12804|3|2e-18|94.7|dre:571331|proline-serine-threonine phosphatase interacting protein 1	GO:0044431//Golgi apparatus part;GO:0016020//membrane	GO:0016772//transferase activity, transferring phosphorus-containing groups;GO:0005515//protein binding	GO:0006796//phosphate-containing compound metabolic process;GO:0031331;GO:0030100//regulation of endocytosis	gi|148695609|gb|EDL27556.1|/0/protein kinase C and casein kinase substrate in neurons 3, isoform CRA_b [Mus musculus]
ENSRNOG00000009734	Akr1b8	-1.29482	0.805827	K00011|1|2e-165|582|mmu:14187|aldehyde reductase [EC:1.1.1.21]	GO:0044424//intracellular part	GO:0005488//binding;GO:0004033//aldo-keto reductase (NADP) activity	GO:0032501//multicellular organismal process;GO:0044237//cellular metabolic process;GO:0006629//lipid metabolic process	gi|149065228|gb|EDM15304.1|/3.08448e-173/rCG27994 [Rattus norvegicus]
ENSRNOG00000014757	-	4.22295	0.897896	K10226|1|5e-09|59.7|tgu:100222881|fatty acid desaturase 2 (delta-6 desaturase) [EC:1.14.19.-];K04257|2|7e-09|59.3|mdo:100024996|olfactory receptor;K10224|5|4e-08|56.6|xtr:100489232|fatty acid desaturase 1 (delta-5 desaturase) [EC:1.14.19.-]	GO:0031224//intrinsic to membrane;GO:0031966//mitochondrial membrane	GO:0016616//oxidoreductase activity, acting on the CH-OH group of donors, NAD or NADP as acceptor;GO:0016215;GO:0005515//protein binding;GO:0005506//iron ion binding	GO:0010038//response to metal ion;GO:0032787//monocarboxylic acid metabolic process;GO:0006091//generation of precursor metabolites and energy;GO:0051234//establishment of localization	gi|2257955|gb|AAB67609.1|/1.4486e-39/cytochrome b5 [Rattus norvegicus]
ENSRNOG00000013409	Gclm	-2.589	0.858073	K11205|1|8e-146|517|rno:29739|glutamate--cysteine ligase regulatory subunit	GO:0043234//protein complex;GO:0044444//cytoplasmic part	GO:0016881//acid-amino acid ligase activity;GO:0019899//enzyme binding;GO:0046983//protein dimerization activity	GO:0003254//regulation of membrane depolarization;GO:0009064//glutamine family amino acid metabolic process;GO:0006749//glutathione metabolic process;GO:0035227;GO:0000096//sulfur amino acid metabolic process;GO:0042221//response to chemical stimulus;GO:0003018;GO:0043066//negative regulation of apoptotic process;GO:0006950//response to stress	gi|8393446|ref|NP_059001.1|/6.41466e-145/glutamate--cysteine ligase regulatory subunit [Rattus norvegicus]
ENSRNOG00000004793	Ncln	3.43343	0.858914	-	GO:0031090//organelle membrane;GO:0031224//intrinsic to membrane;GO:0031981//nuclear lumen	GO:0005488//binding;GO:0016787//hydrolase activity	GO:0019538//protein metabolic process;GO:0007165//signal transduction	gi|62078897|ref|NP_001014104.1|/0/nicalin precursor [Rattus norvegicus]
ENSRNOG00000018367	Taldo1	3.22051	0.878658	K00616|1|0.0|661|rno:83688|transaldolase [EC:2.2.1.2]	GO:0044444//cytoplasmic part	GO:0016744	GO:0005997//xylulose metabolic process;GO:0006098//pentose-phosphate shunt;GO:0015980//energy derivation by oxidation of organic compounds;GO:0006000//fructose metabolic process	gi|42476292|ref|NP_113999.2|/0/transaldolase [Rattus norvegicus]
ENSRNOG00000005981	Nt5c3a	3.85833	0.874661	K01081|1|6e-170|577|mmu:107569|5'-nucleotidase [EC:3.1.3.5]	GO:0043231//intracellular membrane-bounded organelle;GO:0044444//cytoplasmic part	GO:0008252//nucleotidase activity;GO:0046872//metal ion binding;GO:0016740//transferase activity	GO:0006213//pyrimidine nucleoside metabolic process;GO:0006753;GO:0009112;GO:0046128;GO:0006796//phosphate-containing compound metabolic process	gi|172072627|ref|NP_080280.3|/4.8542e-169/cytosolic 5'-nucleotidase 3 isoform 1 [Mus musculus]
ENSRNOG00000002115	Sod1	3.22588	0.884306	K04565|1|1e-86|319|rno:24786|Cu/Zn superoxide dismutase [EC:1.15.1.1]	GO:0042579//microbody;GO:0031981//nuclear lumen;GO:0032991//macromolecular complex;GO:0031982//vesicle;GO:0044429//mitochondrial part;GO:0030425//dendrite;GO:0044297//cell body;GO:0016020//membrane;GO:0044421//extracellular region part	GO:0016209//antioxidant activity;GO:0003824//catalytic activity;GO:0042802//identical protein binding;GO:0019903//protein phosphatase binding;GO:0046914//transition metal ion binding	GO:0001894//tissue homeostasis;GO:0045986//negative regulation of smooth muscle contraction;GO:0001932//regulation of protein phosphorylation;GO:0006281//DNA repair;GO:0045104//intermediate filament cytoskeleton organization;GO:0044093;GO:0014075//response to amine stimulus;GO:0022011//myelination in peripheral nervous system;GO:0006887//exocytosis;GO:0050954//sensory perception of mechanical sti…	gi|8394328|ref|NP_058746.1|/8.64493e-86/superoxide dismutase [Cu-Zn] [Rattus norvegicus]
ENSRNOG00000014050	Ptges2	3.81867	0.875586	K05309|1|0.0|745|rno:311865|microsomal prostaglandin-E synthase 2 [EC:5.3.99.3]	GO:0031224//intrinsic to membrane;GO:0043231//intracellular membrane-bounded organelle;GO:0044444//cytoplasmic part;GO:0012505//endomembrane system	GO:0003676//nucleic acid binding;GO:0016860//intramolecular oxidoreductase activity;GO:0015036//disulfide oxidoreductase activity	GO:0006810//transport;GO:0006693//prostaglandin metabolic process;GO:0019725//cellular homeostasis;GO:0006351//transcription, DNA-dependent	gi|157822395|ref|NP_001101302.1|/0/prostaglandin E synthase 2 [Rattus norvegicus]
ENSRNOG00000016940	Ppp2r2d	-1.96201	0.815441	K04354|1|0.0|652|rno:246255|protein phosphatase 2 (formerly 2A), regulatory subunit B	GO:0008287//protein serine/threonine phosphatase complex;GO:0044444//cytoplasmic part;GO:0031981//nuclear lumen;GO:0008287//protein serine/threonine phosphatase complex;GO:0044444//cytoplasmic part;GO:0031981//nuclear lumen	GO:0016791//phosphatase activity;GO:0019888//protein phosphatase regulator activity;GO:0016791//phosphatase activity;GO:0019888//protein phosphatase regulator activity	GO:0019222//regulation of metabolic process;GO:0023052//signaling;GO:0000087//M phase of mitotic cell cycle;GO:0019222//regulation of metabolic process;GO:0023052//signaling;GO:0000087//M phase of mitotic cell cycle	gi|148747146|ref|NP_653347.2|/0/serine/threonine-protein phosphatase 2A 55 kDa regulatory subunit B delta isoform [Rattus norvegicus]
ENSRNOG00000049920	Psma2	-1.73413	0.817051	K02726|1|2e-130|468|rno:29669|20S proteasome subunit alpha 2 [EC:3.4.25.1]	GO:0043231//intracellular membrane-bounded organelle;GO:0005839//proteasome core complex	GO:0004175//endopeptidase activity;GO:0005488//binding	GO:0043161//proteasomal ubiquitin-dependent protein catabolic process;GO:0051707//response to other organism;GO:0051320//S phase;GO:0007050//cell cycle arrest;GO:0016070//RNA metabolic process;GO:0051439//regulation of ubiquitin-protein ligase activity involved in mitotic cell cycle;GO:0006520//cellular amino acid metabolic process;GO:0006915//apoptotic process;GO:0030330//DNA damage response, si…	gi|8394063|ref|NP_058975.1|/1.23723e-129/proteasome subunit alpha type-2 [Rattus norvegicus]
ENSRNOG00000003117	Psmd12	2.49739	0.856232	K03035|1|0.0|890|rno:287772|26S proteasome regulatory subunit N5	GO:0022624//proteasome accessory complex	GO:0005488//binding	GO:0043161//proteasomal ubiquitin-dependent protein catabolic process;GO:0051320//S phase;GO:0007050//cell cycle arrest;GO:0016070//RNA metabolic process;GO:0051439//regulation of ubiquitin-protein ligase activity involved in mitotic cell cycle;GO:0006520//cellular amino acid metabolic process;GO:0006915//apoptotic process;GO:0030330//DNA damage response, signal transduction by p53 class mediator	gi|54400716|ref|NP_001005875.1|/0/26S proteasome non-ATPase regulatory subunit 12 [Rattus norvegicus]
ENSRNOG00000009565	Pdk4	3.75087	0.901336	K00898|1|0.0|822|rno:89813|pyruvate dehydrogenase kinase [EC:2.7.11.2]	GO:0019866//organelle inner membrane;GO:0044429//mitochondrial part	GO:0004673//protein histidine kinase activity;GO:0032559	GO:0006468//protein phosphorylation;GO:0019318//hexose metabolic process;GO:0006086//acetyl-CoA biosynthetic process from pyruvate;GO:0022611;GO:0007165//signal transduction	gi|149064949|gb|EDM15025.1|/0/pyruvate dehydrogenase kinase, isoenzyme 4 [Rattus norvegicus]
ENSRNOG00000007102	Acss1	-2.04438	0.841033	K01895|1|0.0|1321|rno:296259|acetyl-CoA synthetase [EC:6.2.1.1]	GO:0044429//mitochondrial part	GO:0016405//CoA-ligase activity;GO:0032559	GO:0019541//propionate metabolic process;GO:0006084//acetyl-CoA metabolic process;GO:0006067//ethanol metabolic process;GO:0006083//acetate metabolic process	gi|157818027|ref|NP_001099994.1|/0/acetyl-coenzyme A synthetase 2-like, mitochondrial [Rattus norvegicus]
ENSRNOG00000036696	Hgs	3.15964	0.86451	K12182|1|0.0|1263|rno:56084|hepatocyte growth factor-regulated tyrosine kinase substrate	GO:0005771//multivesicular body;GO:0016023//cytoplasmic membrane-bounded vesicle;GO:0005769//early endosome	GO:0016772//transferase activity, transferring phosphorus-containing groups;GO:0046914//transition metal ion binding;GO:0005515//protein binding	GO:0016192//vesicle-mediated transport;GO:0007041//lysosomal transport;GO:0006796//phosphate-containing compound metabolic process;GO:0009894;GO:0008283//cell proliferation;GO:0015031//protein transport;GO:0007173//epidermal growth factor receptor signaling pathway;GO:0010741//negative regulation of intracellular protein kinase cascade	gi|77539444|ref|NP_062260.2|/0/hepatocyte growth factor-regulated tyrosine kinase substrate [Rattus norvegicus]
ENSRNOG00000009857	Ftsj3	3.45756	0.870664	K14857|1|0.0|1241|rno:303608|AdoMet-dependent rRNA methyltransferase SPB1 [EC:2.1.1.-]	GO:0031981//nuclear lumen	GO:0008168//methyltransferase activity	GO:0006730//one-carbon metabolic process;GO:0000154//rRNA modification	gi|58865606|ref|NP_001012014.1|/0/pre-rRNA processing protein FTSJ3 [Rattus norvegicus]
ENSRNOG00000008116	Ppap2b	-2.33773	0.807184	K01080|1|5e-162|572|rno:192270|phosphatidate phosphatase [EC:3.1.3.4]	GO:0043231//intracellular membrane-bounded organelle;GO:0070161;GO:0031224//intrinsic to membrane;GO:0031090//organelle membrane	GO:0005102//receptor binding;GO:0016791//phosphatase activity	GO:0001934//positive regulation of protein phosphorylation;GO:0060070//canonical Wnt receptor signaling pathway;GO:0007369//gastrulation;GO:0031647//regulation of protein stability;GO:0001944//vasculature development;GO:0016337//cell-cell adhesion;GO:0019637//organophosphate metabolic process;GO:0006643//membrane lipid metabolic process;GO:0007276//gamete generation;GO:0043388//positive regulatio…	gi|48675867|ref|NP_620260.2|/4.0671e-161/lipid phosphate phosphohydrolase 3 [Rattus norvegicus]
ENSRNOG00000028298	-	4.22295	0.890617	K10226|1|4e-07|53.5|xla:399058|fatty acid desaturase 2 (delta-6 desaturase) [EC:1.14.19.-]	GO:0019866//organelle inner membrane;GO:0031966//mitochondrial membrane	GO:0046872//metal ion binding;GO:0009055//electron carrier activity;GO:0030234//enzyme regulator activity	GO:0019222//regulation of metabolic process	gi|354493206|ref|XP_003508734.1|/1.11495e-44/PREDICTED: cytochrome b5 type B-like isoform 2 [Cricetulus griseus]
ENSRNOG00000007967	Sdhb	-3.55599	0.896729	K00235|1|2e-151|535|rno:298596|succinate dehydrogenase (ubiquinone) iron-sulfur subunit [EC:1.3.5.1]	GO:0005746//mitochondrial respiratory chain	GO:0048038//quinone binding;GO:0043169//cation binding;GO:0051536//iron-sulfur cluster binding;GO:0000104//succinate dehydrogenase activity	GO:0022900//electron transport chain;GO:0043648//dicarboxylic acid metabolic process;GO:0009060//aerobic respiration;GO:0051234//establishment of localization	gi|209915614|ref|NP_001094009.1|/1.61036e-150/succinate dehydrogenase [ubiquinone] iron-sulfur subunit, mitochondrial precursor [Rattus norvegicus]
ENSRNOG00000037443	Pgam5	-2.32343	0.841327	K15637|1|1e-155|550|rno:288731|serine/threonine-protein phosphatase PGAM5 [EC:3.1.3.16]	GO:0031224//intrinsic to membrane;GO:0031966//mitochondrial membrane	GO:0016791//phosphatase activity	GO:0006796//phosphate-containing compound metabolic process	gi|149063736|gb|EDM14059.1|/2.0006e-155/rCG21137 [Rattus norvegicus]
ENSRNOG00000046891	Hk1	-2.7961	0.862165	K00844|1|0.0|1335|bta:280817|hexokinase [EC:2.7.1.1]	GO:0031966//mitochondrial membrane	GO:0016773//phosphotransferase activity, alcohol group as acceptor;GO:0032559	GO:0006796//phosphate-containing compound metabolic process;GO:0006007//glucose catabolic process	gi|149038696|gb|EDL92985.1|/0/hexokinase 1, isoform CRA_f [Rattus norvegicus]
ENSRNOG00000038166	Ptgr2	3.1003	0.861523	K13949|1|7e-177|622|mmu:77219|rostaglandin reductase 2 [EC:1.3.1.48]	GO:0043231//intracellular membrane-bounded organelle;GO:0043231//intracellular membrane-bounded organelle	GO:0016628//oxidoreductase activity, acting on the CH-CH group of donors, NAD or NADP as acceptor;GO:0046914//transition metal ion binding;GO:0016628//oxidoreductase activity, acting on the CH-CH group of donors, NAD or NADP as acceptor;GO:0046914//transition metal ion binding	GO:0008152//metabolic process;GO:0008152//metabolic process	gi|206558239|sp|Q5BK81.2|PTGR2_RAT/0/RecName: Full=Prostaglandin reductase 2; Short=PRG-2; AltName: Full=15-oxoprostaglandin 13-reductase; AltName: Full=Zinc-binding alcohol dehydrogenase domain-containing protein 1
ENSRNOG00000004377	Lpin1	3.76702	0.833954	K15728|1|0.0|1707|rno:313977|phosphatidate phosphatase LPIN [EC:3.1.3.4]	GO:0043231//intracellular membrane-bounded organelle;GO:0043234//protein complex	GO:0005102//receptor binding;GO:0003712//transcription cofactor activity;GO:0016791//phosphatase activity;GO:0019899//enzyme binding;GO:0008134//transcription factor binding	GO:0032868//response to insulin stimulus;GO:0006357//regulation of transcription from RNA polymerase II promoter;GO:0016575//histone deacetylation;GO:0030036//actin cytoskeleton organization;GO:0006631//fatty acid metabolic process;GO:0030030//cell projection organization;GO:0045595//regulation of cell differentiation;GO:0009887//organ morphogenesis;GO:0006641//triglyceride metabolic process	gi|149050960|gb|EDM03133.1|/0/rCG61514, isoform CRA_b [Rattus norvegicus]
ENSRNOG00000020624	Acadsb	-2.16466	0.816072	K09478|1|0.0|746|rno:25618|short/branched chain acyl-CoA dehydrogenase [EC:1.3.99.12]	GO:0044429//mitochondrial part	GO:0003995//acyl-CoA dehydrogenase activity;GO:0050662//coenzyme binding	GO:0009062//fatty acid catabolic process;GO:0006732//coenzyme metabolic process;GO:0009063//cellular amino acid catabolic process	gi|6978433|ref|NP_037216.1|/0/short/branched chain specific acyl-CoA dehydrogenase, mitochondrial [Rattus norvegicus]
ENSRNOG00000028292	Gart	-2.48555	0.817787	K11787|1|0.0|1961|rno:288259|phosphoribosylamine--glycine ligase / phosphoribosylglycinamide formyltransferase / phosphoribosylformylglycinamidine cyclo-ligase [EC:6.3.4.13 2.1.2.2 6.3.3.1]	GO:0044444//cytoplasmic part	GO:0043169//cation binding;GO:0016882//cyclo-ligase activity;GO:0016742//hydroxymethyl-, formyl- and related transferase activity;GO:0032559	GO:0006144//purine nucleobase metabolic process;GO:0048856//anatomical structure development;GO:0006188//IMP biosynthetic process;GO:0006730//one-carbon metabolic process;GO:0042221//response to chemical stimulus	gi|197927388|ref|NP_001011899.2|/0/trifunctional purine biosynthetic protein adenosine-3 [Rattus norvegicus]
ENSRNOG00000013746	Senp3	3.17227	0.844988	K08593|1|0.0|1020|rno:303245|sentrin-specific protease 3 [EC:3.4.22.-]	GO:0035097//histone methyltransferase complex	GO:0019783//small conjugating protein-specific protease activity;GO:0005488//binding	GO:0019538//protein metabolic process	gi|197382240|ref|NP_001013134.2|/0/SUMO/sentrin specific peptidase 3 [Rattus norvegicus]
ENSRNOG00000033854	Adh5	3.47349	0.869843	K00121|1|0.0|702|rno:100145871|S-(hydroxymethyl)glutathione dehydrogenase / alcohol dehydrogenase [EC:1.1.1.284 1.1.1.1]	GO:0043231//intracellular membrane-bounded organelle	GO:0016620//oxidoreductase activity, acting on the aldehyde or oxo group of donors, NAD or NADP as acceptor;GO:0046914//transition metal ion binding;GO:0016616//oxidoreductase activity, acting on the CH-OH group of donors, NAD or NADP as acceptor;GO:0042802//identical protein binding;GO:0008289//lipid binding	GO:0044282;GO:0008217//regulation of blood pressure;GO:0006067//ethanol metabolic process;GO:0016101//diterpenoid metabolic process;GO:0002237//response to molecule of bacterial origin;GO:0017014//protein nitrosylation;GO:0032502//developmental process;GO:0006950//response to stress	gi|32264595|gb|AAP78744.1|/0/Ac1002 [Rattus norvegicus]
ENSRNOG00000010277	Idh3a	-2.54294	0.863006	K00030|1|0.0|734|rno:114096|isocitrate dehydrogenase (NAD+) [EC:1.1.1.41]	GO:0030062//mitochondrial tricarboxylic acid cycle enzyme complex	GO:0046872//metal ion binding;GO:0004448//isocitrate dehydrogenase activity;GO:0000166//nucleotide binding	GO:0043648//dicarboxylic acid metabolic process;GO:0019674//NAD metabolic process;GO:0009060//aerobic respiration	gi|149041699|gb|EDL95540.1|/0/isocitrate dehydrogenase 3 (NAD+) alpha, isoform CRA_a [Rattus norvegicus]
ENSRNOG00000001783	Tra2b	2.50177	0.840276	K12897|1|5e-58|226|mdo:100026641|transformer-2 protein	GO:0043231//intracellular membrane-bounded organelle	GO:0003676//nucleic acid binding	GO:0000377;GO:0006979//response to oxidative stress	gi|62087996|dbj|BAD92445.1|/3.7068e-58/splicing factor, arginine/serine-rich 10 (transformer 2 homolog, Drosophila) variant [Homo sapiens]
ENSRNOG00000001269	PPP1CC	-2.59926	0.857	K06269|1|0.0|697|ptr:743656|protein phosphatase 1, catalytic subunit [EC:3.1.3.16]	GO:0008287//protein serine/threonine phosphatase complex;GO:0031966//mitochondrial membrane;GO:0032155;GO:0000776//kinetochore;GO:0030425//dendrite;GO:0035097//histone methyltransferase complex;GO:0016604//nuclear body	GO:0004721//phosphoprotein phosphatase activity;GO:0043169//cation binding;GO:0019900//kinase binding	GO:0006073//cellular glucan metabolic process;GO:0006796//phosphate-containing compound metabolic process;GO:0007067//mitosis;GO:0006464//cellular protein modification process;GO:0032386//regulation of intracellular transport;GO:0006641//triglyceride metabolic process	gi|401709959|ref|NP_001257912.1|/0/serine/threonine-protein phosphatase PP1-gamma catalytic subunit isoform 2 [Rattus norvegicus]
ENSRNOG00000005418	Trap1	3.63115	0.886042	K09488|1|0.0|1380|rno:287069|TNF receptor-associated protein 1	GO:0043231//intracellular membrane-bounded organelle	GO:0032813//tumor necrosis factor receptor superfamily binding;GO:0032559	GO:0006979//response to oxidative stress;GO:0044267//cellular protein metabolic process	gi|84781723|ref|NP_001034090.1|/0/heat shock protein 75 kDa, mitochondrial precursor [Rattus norvegicus]
ENSRNOG00000004027	Aldh9a1	-2.68771	0.859198	K00149|1|0.0|1006|rno:64040|aldehyde dehydrogenase family 9 member A1 [EC:1.2.1.47 1.2.1.3]	GO:0043231//intracellular membrane-bounded organelle;GO:0005856//cytoskeleton;GO:0044444//cytoplasmic part;GO:0016020//membrane	GO:0004030//aldehyde dehydrogenase [NAD(P)+] activity;GO:0042802//identical protein binding;GO:0000166//nucleotide binding	GO:0042133//neurotransmitter metabolic process;GO:0006520//cellular amino acid metabolic process;GO:0048513//organ development;GO:0006578//amino-acid betaine biosynthetic process	gi|149058126|gb|EDM09283.1|/0/aldehyde dehydrogenase family 9, subfamily A1 [Rattus norvegicus]
ENSRNOG00000008377	Wdtc1	3.46212	0.840875	K11807|1|0.0|1332|rno:313020|WD and tetratricopeptide repeats protein 1	GO:0043231//intracellular membrane-bounded organelle;GO:0044444//cytoplasmic part	GO:0030234//enzyme regulator activity;GO:0019899//enzyme binding	GO:0019318//hexose metabolic process;GO:0040007//growth;GO:0032535//regulation of cellular component size;GO:0019725//cellular homeostasis;GO:0000122//negative regulation of transcription from RNA polymerase II promoter;GO:0032868//response to insulin stimulus	gi|157816891|ref|NP_001101378.1|/0/WD and tetratricopeptide repeats protein 1 [Rattus norvegicus]
ENSRNOG00000001736	Bdh1	3.48284	0.863301	K00019|1|0.0|697|rno:117099|3-hydroxybutyrate dehydrogenase [EC:1.1.1.30]	GO:0019866//organelle inner membrane;GO:0044429//mitochondrial part	GO:0016616//oxidoreductase activity, acting on the CH-OH group of donors, NAD or NADP as acceptor;GO:0008289//lipid binding	GO:0007417//central nervous system development;GO:0009888//tissue development;GO:0010038//response to metal ion;GO:0043627//response to estrogen stimulus;GO:0031667//response to nutrient levels;GO:0043434//response to peptide hormone stimulus;GO:0051384//response to glucocorticoid stimulus;GO:0008152//metabolic process;GO:0006950//response to stress	gi|55742813|ref|NP_446447.2|/0/D-beta-hydroxybutyrate dehydrogenase, mitochondrial [Rattus norvegicus]
ENSRNOG00000011189	Acy1	2.81574	0.837393	K14677|1|0.0|803|rno:300981|aminoacylase [EC:3.5.1.14]	GO:0044444//cytoplasmic part	GO:0016811//hydrolase activity, acting on carbon-nitrogen (but not peptide) bonds, in linear amides;GO:0043169//cation binding;GO:0070011	GO:0009057//macromolecule catabolic process;GO:0019538//protein metabolic process;GO:0019752//carboxylic acid metabolic process	gi|81884653|sp|Q6AYS7.1|ACY1A_RAT/0/RecName: Full=Aminoacylase-1A; Short=ACY-1A; AltName: Full=ACY IA; AltName: Full=N-acyl-L-amino-acid amidohydrolase
ENSRNOG00000009422	Hmgcl	3.02669	0.841464	K01640|1|0.0|637|rno:79238|hydroxymethylglutaryl-CoA lyase [EC:4.1.3.4]	GO:0019866//organelle inner membrane;GO:0044429//mitochondrial part	GO:0043169//cation binding;GO:0016833//oxo-acid-lyase activity;GO:0005504//fatty acid binding	GO:0033993//response to lipid;GO:0044249//cellular biosynthetic process;GO:0006996//organelle organization;GO:0031667//response to nutrient levels;GO:0006732//coenzyme metabolic process;GO:0048513//organ development;GO:0006950//response to stress;GO:0043438//acetoacetic acid metabolic process	gi|13242293|ref|NP_077362.1|/0/hydroxymethylglutaryl-CoA lyase, mitochondrial precursor [Rattus norvegicus]
ENSRNOG00000003139	Smc1a	3.77889	0.852709	K06636|1|0.0|1991|cfa:480928|structural maintenance of chromosome 1	GO:0000776//kinetochore;GO:0000228//nuclear chromosome;GO:0008278//cohesin complex	GO:0046983//protein dimerization activity;GO:0032559;GO:0003774//motor activity	GO:0006259//DNA metabolic process;GO:0007050//cell cycle arrest;GO:0009628//response to abiotic stimulus;GO:0000070//mitotic sister chromatid segregation;GO:0000377;GO:0033554//cellular response to stress;GO:0010948;GO:0035556//intracellular signal transduction	gi|348553156|ref|XP_003462393.1|/0/PREDICTED: LOW QUALITY PROTEIN: structural maintenance of chromosomes protein 1A-like [Cavia porcellus]
ENSRNOG00000009244	Abhd4	4.1469	0.900999	K13698|1|0.0|739|rno:364380|abhydrolase domain-containing protein 4	-	-	GO:0006629//lipid metabolic process	gi|157819991|ref|NP_001102336.1|/0/abhydrolase domain-containing protein 4 [Rattus norvegicus]
ENSRNOG00000015018	Pdia3	3.74229	0.895519	K08056|1|0.0|930|rno:29468|protein disulfide isomerase family A, member 3 [EC:5.3.4.1]	GO:0044432//endoplasmic reticulum part;GO:0048770	GO:0016862//intramolecular oxidoreductase activity, interconverting keto- and enol-groups;GO:0015036//disulfide oxidoreductase activity	GO:0006915//apoptotic process;GO:0018904;GO:0044267//cellular protein metabolic process;GO:0019725//cellular homeostasis	gi|1352384|sp|P11598.2|PDIA3_RAT/0/RecName: Full=Protein disulfide-isomerase A3; AltName: Full=58 kDa glucose-regulated protein; AltName: Full=58 kDa microsomal protein; Short=p58; AltName: Full=Disulfide isomerase ER-60; AltName: Full=Endoplasmic reticulum resident protein 57; Short=ER protein 57; Short=ERp57; AltName: Full=Endoplasmic reticulum resident protein 60; Short=ER protein 60; Short=ER…
ENSRNOG00000007478	Cry2	2.25585	0.801746	K02295|1|0.0|1174|rno:170917|cryptochrome	GO:0043231//intracellular membrane-bounded organelle	GO:0005488//binding;GO:0016830//carbon-carbon lyase activity;GO:0004872//receptor activity	GO:0006259//DNA metabolic process;GO:0048511//rhythmic process;GO:0023052//signaling;GO:0006605//protein targeting;GO:0006351//transcription, DNA-dependent;GO:0006464//cellular protein modification process	gi|149022681|gb|EDL79575.1|/0/cryptochrome 2 (photolyase-like), isoform CRA_a [Rattus norvegicus]
ENSRNOG00000000847	Csnk2b	3.80679	0.899579	K03115|1|3e-122|428|cfa:474844|casein kinase II subunit beta	GO:0043234//protein complex;GO:0044444//cytoplasmic part;GO:0016020//membrane	GO:0004672//protein kinase activity;GO:0019207//kinase regulator activity;GO:0005515//protein binding	GO:0016055//Wnt receptor signaling pathway;GO:0007243//intracellular protein kinase cascade;GO:0019222//regulation of metabolic process;GO:0006935//chemotaxis;GO:0019221//cytokine-mediated signaling pathway;GO:0006461//protein complex assembly;GO:0016310//phosphorylation;GO:0051098//regulation of binding;GO:0008283//cell proliferation	gi|149028072|gb|EDL83523.1|/1.9999e-118/casein kinase 2, beta subunit, isoform CRA_b [Rattus norvegicus]
ENSRNOG00000050381	Dus3l	3.27177	0.803755	K05544|1|0.0|1252|rno:301122|tRNA-dihydrouridine synthase 3 [EC:1.3.1.89]	-	GO:0046914//transition metal ion binding;GO:0016627//oxidoreductase activity, acting on the CH-CH group of donors;GO:0050662//coenzyme binding	GO:0006399//tRNA metabolic process	gi|149028168|gb|EDL83606.1|/0/dihydrouridine synthase 3-like (S. cerevisiae), isoform CRA_c [Rattus norvegicus]
ENSRNOG00000009882	PPP3CA	3.2889	0.866425	K04348|1|0.0|1011|pon:100174530|protein phosphatase 3, catalytic subunit [EC:3.1.3.16]	GO:0031981//nuclear lumen;GO:0008287//protein serine/threonine phosphatase complex;GO:0031674//I band	GO:0046983//protein dimerization activity;GO:0046872//metal ion binding;GO:0004722//protein serine/threonine phosphatase activity	GO:0014075//response to amine stimulus;GO:0006357//regulation of transcription from RNA polymerase II promoter;GO:0006605//protein targeting;GO:0048747//muscle fiber development;GO:0006796//phosphate-containing compound metabolic process;GO:0050796//regulation of insulin secretion;GO:0051899//membrane depolarization;GO:0022402//cell cycle process;GO:0070838//divalent metal ion transport;GO:000646…	gi|4584820|emb|CAA40398.2|/0/serine/threonine specific protein phosphatase [Rattus norvegicus]
ENSRNOG00000016244	Mical2	3.1653	0.838224	K06115|1|5e-21|104|mmu:20741|spectrin beta	GO:0043232	GO:0046914//transition metal ion binding;GO:0016491//oxidoreductase activity	GO:0008152//metabolic process	gi|213385317|ref|NP_001132980.1|/0/protein-methionine sulfoxide oxidase MICAL2 [Rattus norvegicus]
ENSRNOG00000009592	Cyb5r3	3.82101	0.898927	K00326|1|5e-168|592|rno:25035|cytochrome-b5 reductase [EC:1.6.2.2]	GO:0043234//protein complex;GO:0031966//mitochondrial membrane;GO:0019866//organelle inner membrane;GO:0019866//organelle inner membrane;GO:0031966//mitochondrial membrane	GO:0016653//oxidoreductase activity, acting on NADH or NADPH, heme protein as acceptor;GO:0050662//coenzyme binding;GO:0032559;GO:0016653//oxidoreductase activity, acting on NADH or NADPH, heme protein as acceptor;GO:0050662//coenzyme binding;GO:0032559	GO:0006766//vitamin metabolic process;GO:0003013;GO:0006694//steroid biosynthetic process;GO:0008203//cholesterol metabolic process;GO:0006694//steroid biosynthetic process;GO:0008203//cholesterol metabolic process	gi|20302049|ref|NP_620232.1|/1.0528e-158/NADH-cytochrome b5 reductase 3 [Rattus norvegicus]
ENSRNOG00000001070	Cdk2ap1	-1.96676	0.846534	-	GO:0043231//intracellular membrane-bounded organelle	GO:0003676//nucleic acid binding;GO:0016772//transferase activity, transferring phosphorus-containing groups	GO:0006260//DNA replication;GO:0006464//cellular protein modification process;GO:0009653//anatomical structure morphogenesis;GO:0006796//phosphate-containing compound metabolic process;GO:0051320//S phase	gi|49355794|ref|NP_038840.2|/2.97111e-57/cyclin-dependent kinase 2-associated protein 1 [Mus musculus]
ENSRNOG00000012081	Txn1	-1.78653	0.844609	K03671|1|1e-40|165|rno:116484|thioredoxin 1	GO:0031981//nuclear lumen;GO:0044444//cytoplasmic part	GO:0015036//disulfide oxidoreductase activity;GO:0016209//antioxidant activity;GO:0005488//binding	GO:0051099//positive regulation of binding;GO:0006357//regulation of transcription from RNA polymerase II promoter;GO:0055086//nucleobase-containing small molecule metabolic process;GO:0018904;GO:0006091//generation of precursor metabolites and energy;GO:0023052//signaling;GO:0007154//cell communication;GO:0019725//cellular homeostasis;GO:0000060//protein import into nucleus, translocation;GO:000…	gi|16758644|ref|NP_446252.1|/6.47702e-40/thioredoxin [Rattus norvegicus]
ENSRNOG00000016251	Dnaja2	-2.80388	0.867077	K09503|1|0.0|721|rno:84026|DnaJ homolog subfamily A member 2	GO:0044424//intracellular part	GO:0043169//cation binding;GO:0005515//protein binding;GO:0032559	GO:0008283//cell proliferation;GO:0006950//response to stress;GO:0044267//cellular protein metabolic process	gi|403292522|ref|XP_003937295.1|/0/PREDICTED: dnaJ homolog subfamily A member 2 [Saimiri boliviensis boliviensis]
ENSRNOG00000003504	Rnaseh2a	-2.87979	0.845051	K10743|1|4e-166|585|rno:364974|ribonuclease H2 subunit A [EC:3.1.26.4]	GO:0043234//protein complex;GO:0043231//intracellular membrane-bounded organelle	GO:0043169//cation binding;GO:0003676//nucleic acid binding;GO:0016891//endoribonuclease activity, producing 5'-phosphomonoesters	GO:0016070//RNA metabolic process	gi|61557385|ref|NP_001013252.1|/2.88062e-165/ribonuclease H2 subunit A [Rattus norvegicus]
ENSRNOG00000008320	Lypla1	-2.58078	0.855706	K06128|1|1e-119|431|rno:25514|lysophospholipase I [EC:3.1.1.5]	GO:0043231//intracellular membrane-bounded organelle;GO:0044444//cytoplasmic part	GO:0004091//carboxylesterase activity;GO:0016790//thiolester hydrolase activity	GO:0032787//monocarboxylic acid metabolic process;GO:0006807//nitrogen compound metabolic process;GO:0032768;GO:0044238//primary metabolic process	gi|6981362|ref|NP_037138.1|/1.07341e-118/acyl-protein thioesterase 1 [Rattus norvegicus]
ENSRNOG00000018718	Rpp30	3.56668	0.851352	K03539|1|1e-148|527|rno:685332|ribonuclease P/MRP protein subunit RPP1 [EC:3.1.26.5]	GO:0030681;GO:0031981//nuclear lumen	GO:0005488//binding;GO:0004549//tRNA-specific ribonuclease activity	GO:0006399//tRNA metabolic process	gi|300797494|ref|NP_001178012.1|/7.73293e-148/ribonuclease P protein subunit p30 [Rattus norvegicus]
ENSRNOG00000025602	Cdk4	-2.78266	0.854802	K02089|1|5e-175|614|rno:94201|cyclin-dependent kinase 4 [EC:2.7.11.22]	GO:0031981//nuclear lumen;GO:0043234//protein complex;GO:0044444//cytoplasmic part	GO:0005515//protein binding;GO:0004674//protein serine/threonine kinase activity;GO:0032559	GO:0048511//rhythmic process;GO:0006412//translation;GO:0006796//phosphate-containing compound metabolic process;GO:0051320//S phase;GO:0048545//response to steroid hormone stimulus;GO:0023052//signaling;GO:0051318//G1 phase;GO:0008284//positive regulation of cell proliferation;GO:0008361//regulation of cell size;GO:0051726//regulation of cell cycle;GO:0010038//response to metal ion;GO:0006915//a…	gi|16758944|ref|NP_446045.1|/3.79304e-174/cyclin-dependent kinase 4 [Rattus norvegicus]
ENSRNOG00000020793	Ruvbl2	-2.16148	0.815231	K11338|1|0.0|852|ecb:100051665|RuvB-like protein 2 [EC:3.6.4.12]	GO:0034399//nuclear periphery;GO:0043189//H4/H2A histone acetyltransferase complex;GO:0035097//histone methyltransferase complex	GO:0005515//protein binding;GO:0032559;GO:0003677//DNA binding;GO:0003678//DNA helicase activity	GO:0006351//transcription, DNA-dependent;GO:0006259//DNA metabolic process;GO:0009207;GO:0050789//regulation of biological process;GO:0016573//histone acetylation	gi|6755382|ref|NP_035434.1|/0/ruvB-like 2 [Mus musculus]
ENSRNOG00000021270	Trmt6	3.24818	0.826244	K03256|1|0.0|867|rno:311441|tRNA (adenine-N(1)-)-methyltransferase non-catalytic subunit	GO:0043231//intracellular membrane-bounded organelle	GO:0008135//translation factor activity, nucleic acid binding;GO:0003824//catalytic activity	GO:0006413//translational initiation;GO:0006399//tRNA metabolic process;GO:0006730//one-carbon metabolic process	gi|37360264|dbj|BAC98110.1|/0/mKIAA1153 protein [Mus musculus]
ENSRNOG00000017829	Ssu72	3.60444	0.887662	K15544|1|6e-109|394|rno:298681|RNA polymerase II subunit A C-terminal domain phosphatase SSU72 [EC:3.1.3.16]	GO:0043231//intracellular membrane-bounded organelle	GO:0016791//phosphatase activity	GO:0006796//phosphate-containing compound metabolic process;GO:0006396//RNA processing	gi|71043762|ref|NP_001020828.1|/4.93295e-108/RNA polymerase II subunit A C-terminal domain phosphatase SSU72 [Rattus norvegicus]
ENSRNOG00000015654	Ghr	3.99527	0.889071	K05080|1|0.0|1306|rno:25235|growth hormone receptor	GO:0043231//intracellular membrane-bounded organelle;GO:0044297//cell body;GO:0016021//integral to membrane;GO:0043235//receptor complex;GO:0044421//extracellular region part;GO:0043231//intracellular membrane-bounded organelle;GO:0044297//cell body;GO:0016021//integral to membrane;GO:0043235//receptor complex;GO:0044421//extracellular region part	GO:0004896//cytokine receptor activity;GO:0019904//protein domain specific binding;GO:0042802//identical protein binding;GO:0019902//phosphatase binding;GO:0042277//peptide binding;GO:0019900//kinase binding;GO:0004896//cytokine receptor activity;GO:0019904//protein domain specific binding;GO:0042802//identical protein binding;GO:0019902//phosphatase binding;GO:0042277//peptide binding;GO:0019900…	GO:0042506//tyrosine phosphorylation of Stat5 protein;GO:0001934//positive regulation of protein phosphorylation;GO:0009081//branched-chain amino acid metabolic process;GO:0043648//dicarboxylic acid metabolic process;GO:0032868//response to insulin stimulus;GO:0006898//receptor-mediated endocytosis;GO:0072350;GO:0042976//activation of Janus kinase activity;GO:0051216//cartilage development;GO:004…	gi|8393434|ref|NP_058790.1|/0/growth hormone receptor precursor [Rattus norvegicus]
ENSRNOG00000006609	Psme4	-1.98912	0.837309	K06699|1|0.0|3469|rno:498433|proteasome activator subunit 4	GO:0016604//nuclear body;GO:0043234//protein complex	-	GO:0043161//proteasomal ubiquitin-dependent protein catabolic process;GO:0051320//S phase;GO:0007050//cell cycle arrest;GO:0016070//RNA metabolic process;GO:0051439//regulation of ubiquitin-protein ligase activity involved in mitotic cell cycle;GO:0006520//cellular amino acid metabolic process;GO:0006915//apoptotic process;GO:0048869//cellular developmental process;GO:0048232//male gamete generat…	gi|281427165|ref|NP_001020311.2|/0/proteasome (prosome, macropain) activator subunit 4 [Rattus norvegicus]
ENSRNOG00000018708	Ppp1ca	3.45506	0.887798	K06269|1|0.0|680|ssc:733611|protein phosphatase 1, catalytic subunit [EC:3.1.3.16]	GO:0008287//protein serine/threonine phosphatase complex;GO:0030425//dendrite;GO:0035097//histone methyltransferase complex;GO:0043025//neuronal cell body;GO:0044444//cytoplasmic part	GO:0004721//phosphoprotein phosphatase activity;GO:0043169//cation binding;GO:0019888//protein phosphatase regulator activity	GO:0005980//glycogen catabolic process;GO:0006412//translation;GO:0001763//morphogenesis of a branching structure;GO:0005978//glycogen biosynthetic process;GO:0007126//meiosis;GO:0030323//respiratory tube development;GO:0006464//cellular protein modification process;GO:0019222//regulation of metabolic process;GO:0006641//triglyceride metabolic process	gi|4506003|ref|NP_002699.1|/0/serine/threonine-protein phosphatase PP1-alpha catalytic subunit isoform 1 [Homo sapiens]
ENSRNOG00000047708	Gstz1	2.9208	0.852877	K01800|1|3e-119|429|rno:681913|maleylacetoacetate isomerase [EC:5.2.1.2]	GO:0043231//intracellular membrane-bounded organelle;GO:0044444//cytoplasmic part	GO:0042802//identical protein binding;GO:0016859//cis-trans isomerase activity;GO:0004601//peroxidase activity;GO:0016765//transferase activity, transferring alkyl or aryl (other than methyl) groups	GO:0006790//sulfur compound metabolic process;GO:0006558//L-phenylalanine metabolic process;GO:0006570//tyrosine metabolic process	gi|354475007|ref|XP_003499721.1|/2.42432e-119/PREDICTED: maleylacetoacetate isomerase-like [Cricetulus griseus]
ENSRNOG00000015869	Pccb	-2.63577	0.860187	K01966|1|0.0|1060|rno:24624|propionyl-CoA carboxylase beta chain [EC:6.4.1.3]	GO:0044429//mitochondrial part	GO:0016421//CoA carboxylase activity;GO:0032559	GO:0009062//fatty acid catabolic process;GO:0006520//cellular amino acid metabolic process	gi|148747119|ref|NP_058726.2|/0/propionyl-CoA carboxylase beta chain, mitochondrial precursor [Rattus norvegicus]
ENSRNOG00000014462	Fnta	-2.9188	0.854192	K05955|1|0.0|640|rno:25318|protein farnesyltransferase/geranylgeranyltransferase type-1 subunit alpha [EC:2.5.1.58 2.5.1.59]	GO:0015630//microtubule cytoskeleton;GO:0043234//protein complex;GO:0044444//cytoplasmic part	GO:0046914//transition metal ion binding;GO:0008289//lipid binding;GO:0015631//tubulin binding;GO:0004661//protein geranylgeranyltransferase activity;GO:0030545	GO:0007178//transmembrane receptor protein serine/threonine kinase signaling pathway;GO:0010557//positive regulation of macromolecule biosynthetic process;GO:0010558;GO:0010033//response to organic substance;GO:0018342//protein prenylation;GO:0008283//cell proliferation;GO:0051345//positive regulation of hydrolase activity;GO:0051726//regulation of cell cycle;GO:0006915//apoptotic process;GO:0090…	gi|38492574|pdb|1O5M|A/0/Chain A, Structure Of Fpt Bound To The Inhibitor Sch66336
ENSRNOG00000010958	Prdx3	-2.09252	0.855086	K03386|1|7e-146|517|rno:64371|peroxiredoxin (alkyl hydroperoxide reductase subunit C) [EC:1.11.1.15]	GO:0043234//protein complex;GO:0005768//endosome	GO:0016705//oxidoreductase activity, acting on paired donors, with incorporation or reduction of molecular oxygen;GO:0016757//transferase activity, transferring glycosyl groups;GO:0016209//antioxidant activity;GO:0004869//cysteine-type endopeptidase inhibitor activity;GO:0019900//kinase binding	GO:0030097//hemopoiesis;GO:0043549//regulation of kinase activity;GO:0042743//hydrogen peroxide metabolic process;GO:0055086//nucleobase-containing small molecule metabolic process;GO:0008283//cell proliferation;GO:0051091//positive regulation of sequence-specific DNA binding transcription factor activity;GO:0001890//placenta development;GO:0000302//response to reactive oxygen species;GO:0006996/…	gi|149040547|gb|EDL94585.1|/3.19355e-146/peroxiredoxin 3 [Rattus norvegicus]
ENSRNOG00000050473	Rps27l	3.69719	0.892048	K02978|1|5e-38|155|ssc:100738416|small subunit ribosomal protein S27e	GO:0043231//intracellular membrane-bounded organelle;GO:0030529//ribonucleoprotein complex	GO:0090079;GO:0005198//structural molecule activity;GO:0016505//apoptotic protease activator activity;GO:0043169//cation binding	GO:0006412//translation;GO:0008630//intrinsic apoptotic signaling pathway in response to DNA damage response;GO:0006259//DNA metabolic process;GO:0051345//positive regulation of hydrolase activity;GO:0000077//DNA damage checkpoint	gi|392337774|ref|XP_003753352.1|/8.37507e-40/PREDICTED: 40S ribosomal protein S27-like [Rattus norvegicus]
ENSRNOG00000013331	Sdha	3.89665	0.908204	K00234|1|0.0|1263|rno:157074|succinate dehydrogenase (ubiquinone) flavoprotein subunit [EC:1.3.5.1]	GO:0005746//mitochondrial respiratory chain	GO:0050662//coenzyme binding;GO:0000104//succinate dehydrogenase activity	GO:0048731;GO:0022900//electron transport chain;GO:0043648//dicarboxylic acid metabolic process;GO:0009060//aerobic respiration;GO:0051234//establishment of localization	gi|18426858|ref|NP_569112.1|/0/succinate dehydrogenase [ubiquinone] flavoprotein subunit, mitochondrial precursor [Rattus norvegicus]
ENSRNOG00000010420	Shfm1	3.28676	0.880393	K10881|1|7e-17|87.8|acs:100552789|26 proteasome complex subunit DSS1	GO:0016591//DNA-directed RNA polymerase II, holoenzyme	GO:0005488//binding;GO:0016787//hydrolase activity	GO:0019538//protein metabolic process	gi|403306658|ref|XP_003943840.1|/5.71598e-16/PREDICTED: 26S proteasome complex subunit DSS1-like [Saimiri boliviensis boliviensis]
ENSRNOG00000009686	Aqp7	-2.73771	0.856222	K08771|1|5e-156|551|rno:29171|aquaporin-7	GO:0030054//cell junction;GO:0032991//macromolecular complex;GO:0016021//integral to membrane;GO:0005903//brush border;GO:0044424//intracellular part	GO:0005372//water transmembrane transporter activity;GO:0015204//urea transmembrane transporter activity;GO:0015168//glycerol transmembrane transporter activity;GO:0022829//wide pore channel activity	GO:0042886//amide transport;GO:0003097//renal water transport;GO:0042221//response to chemical stimulus;GO:0048232//male gamete generation;GO:0008643//carbohydrate transport;GO:0044237//cellular metabolic process	gi|27734168|ref|NP_062030.2|/4.23881e-155/aquaporin-7 [Rattus norvegicus]
ENSRNOG00000005795	Aasdhppt	3.09902	0.850289	K06133|1|5e-175|613|rno:300328|4'-phosphopantetheinyl transferase [EC:2.7.8.-]	GO:0044444//cytoplasmic part	GO:0046872//metal ion binding;GO:0016780//phosphotransferase activity, for other substituted phosphate groups	GO:0006766//vitamin metabolic process;GO:0009058//biosynthetic process;GO:0006575//cellular modified amino acid metabolic process	gi|256985146|ref|NP_001100268.2|/4.09202e-174/L-aminoadipate-semialdehyde dehydrogenase-phosphopantetheinyl transferase [Rattus norvegicus]
ENSRNOG00000000815	Smpdl3a	3.37919	0.850447	K01128|1|0.0|925|rno:294422|[EC:3.1.4.-]	GO:0044421//extracellular region part	GO:0005488//binding;GO:0004620//phospholipase activity	GO:0006684//sphingomyelin metabolic process	gi|53850608|ref|NP_001005539.1|/0/acid sphingomyelinase-like phosphodiesterase 3a precursor [Rattus norvegicus]
ENSRNOG00000016827	Slc38a3	3.37746	0.818271	K13576|1|0.0|915|rno:252919|solute carrier family 38 (sodium-coupled neutral amino acid transporter), member 3	GO:0016021//integral to membrane	GO:0015175//neutral amino acid transmembrane transporter activity;GO:0015174//basic amino acid transmembrane transporter activity;GO:0015179//L-amino acid transmembrane transporter activity;GO:0015291//secondary active transmembrane transporter activity	GO:0015804//neutral amino acid transport;GO:0015807//L-amino acid transport;GO:0015802//basic amino acid transport;GO:0006807//nitrogen compound metabolic process;GO:0030001//metal ion transport	gi|21955257|ref|NP_665719.1|/0/sodium-coupled neutral amino acid transporter 3 [Rattus norvegicus]
ENSRNOG00000016807	Oat	-2.54056	0.854981	K00819|1|0.0|845|rno:64313|ornithine--oxo-acid transaminase [EC:2.6.1.13]	GO:0044429//mitochondrial part	GO:0008483//transaminase activity;GO:0048037//cofactor binding	GO:0006520//cellular amino acid metabolic process	gi|11968102|ref|NP_071966.1|/0/ornithine aminotransferase, mitochondrial precursor [Rattus norvegicus]
ENSRNOG00000004505	Nfic	3.53123	0.875734	K09170|1|0.0|796|rno:29228|nuclear factor I/C	GO:0043231//intracellular membrane-bounded organelle	GO:0001071//nucleic acid binding transcription factor activity;GO:0043565//sequence-specific DNA binding;GO:0043566//structure-specific DNA binding	GO:0042476//odontogenesis;GO:0006259//DNA metabolic process;GO:0000122//negative regulation of transcription from RNA polymerase II promoter	gi|148228879|ref|NP_113755.1|/0/nuclear factor 1 C-type [Rattus norvegicus]
ENSRNOG00000016833	Ide	2.7924	0.81096	K01408|1|0.0|2040|rno:25700|insulysin [EC:3.4.24.56]	GO:0000502//proteasome complex;GO:0044439;GO:0044421//extracellular region part	GO:0004175//endopeptidase activity;GO:0046914//transition metal ion binding;GO:0017046//peptide hormone binding;GO:0017111//nucleoside-triphosphatase activity;GO:0060089;GO:0042165//neurotransmitter binding;GO:0042802//identical protein binding;GO:0032559	GO:0043171//peptide catabolic process;GO:0030162//regulation of proteolysis;GO:0003006//developmental process involved in reproduction;GO:0009100//glycoprotein metabolic process;GO:0023052//signaling;GO:0009207;GO:0030163//protein catabolic process;GO:0051704;GO:0051260//protein homooligomerization	gi|6981076|ref|NP_037291.1|/0/insulin-degrading enzyme [Rattus norvegicus]
ENSRNOG00000003873	Cpd	3.30622	0.866299	K07752|1|0.0|2568|rno:25306|carboxypeptidase D [EC:3.4.17.22]	GO:0044431//Golgi apparatus part;GO:0031224//intrinsic to membrane	GO:0008235//metalloexopeptidase activity;GO:0046914//transition metal ion binding;GO:0004180//carboxypeptidase activity	GO:0070669//response to interleukin-2;GO:0019538//protein metabolic process	gi|6978699|ref|NP_036968.1|/0/carboxypeptidase D precursor [Rattus norvegicus]
ENSRNOG00000005333	Azin1	3.70045	0.877606	K01581|1|3e-122|441|xla:379859|ornithine decarboxylase [EC:4.1.1.17]	GO:0044444//cytoplasmic part	GO:0008047//enzyme activator activity;GO:0005488//binding;GO:0004857//enzyme inhibitor activity	GO:0019222//regulation of metabolic process;GO:0006595//polyamine metabolic process;GO:0006520//cellular amino acid metabolic process	gi|38494225|gb|AAH61550.1|/0/Antizyme inhibitor 1 [Rattus norvegicus]
ENSRNOG00000010744	Nrp1	3.59276	0.836794	K06724|1|0.0|1771|rno:246331|neuropilin 1	GO:0030427//site of polarized growth;GO:0043005//neuron projection;GO:0044297//cell body;GO:0005882//intermediate filament;GO:0031224//intrinsic to membrane	GO:0005515//protein binding;GO:0004714//transmembrane receptor protein tyrosine kinase activity	GO:0001525//angiogenesis;GO:0008283//cell proliferation;GO:0060600;GO:0006796//phosphate-containing compound metabolic process;GO:0048513//organ development;GO:0048870//cell motility;GO:0007154//cell communication;GO:0007169//transmembrane receptor protein tyrosine kinase signaling pathway;GO:0006935//chemotaxis;GO:0021559//trigeminal nerve development;GO:0030517//negative regulation of axon exte…	gi|26023947|ref|NP_659566.1|/0/neuropilin-1 precursor [Rattus norvegicus]
ENSRNOG00000014980	Mob4	3.44285	0.833176	K04078|1|6e-121|436|ptr:459853|chaperonin GroES;K06685|2|9e-07|56.6|cin:100185307|maintenance of ploidy protein MOB1 (MPS1 binder 1)	GO:0000139//Golgi membrane	GO:0043169//cation binding;GO:0016772//transferase activity, transferring phosphorus-containing groups	GO:0051234//establishment of localization;GO:0006796//phosphate-containing compound metabolic process	gi|19424180|ref|NP_598212.1|/1.7257e-130/MOB-like protein phocein [Rattus norvegicus]
ENSRNOG00000014765	Vapa	3.88237	0.900694	K06096|1|3e-130|466|rno:58857|vesicle-associated membrane protein-associated protein A	GO:0043296//apical junction complex;GO:0031224//intrinsic to membrane;GO:0043231//intracellular membrane-bounded organelle;GO:0015630//microtubule cytoskeleton;GO:0044444//cytoplasmic part;GO:0031090//organelle membrane	GO:0060089;GO:0046983//protein dimerization activity	GO:0006643//membrane lipid metabolic process;GO:0016044//cellular membrane organization;GO:0007249//I-kappaB kinase/NF-kappaB cascade	gi|118142811|ref|NP_113819.3|/2.44815e-129/vesicle-associated membrane protein-associated protein A [Rattus norvegicus]
ENSRNOG00000017780	Akr7a2	3.16089	0.852824	K15303|1|0.0|652|rno:171445|aflatoxin B1 aldehyde reductase	GO:0044431//Golgi apparatus part	GO:0004033//aldo-keto reductase (NADP) activity	GO:0044238//primary metabolic process;GO:0044237//cellular metabolic process	gi|39930812|sp|Q8CG45.2|ARK72_RAT/0/RecName: Full=Aflatoxin B1 aldehyde reductase member 2; Short=rAFAR2; AltName: Full=Succinic semialdehyde reductase; Short=SSA reductase
ENSRNOG00000017404	Pcmtd2	3.59643	0.876649	K00573|1|3e-15|85.5|smm:Smp_058140.3|protein-L-isoaspartate(D-aspartate) O-methyltransferase [EC:2.1.1.77]	GO:0044424//intracellular part	GO:0008757//S-adenosylmethionine-dependent methyltransferase activity	GO:0006730//one-carbon metabolic process;GO:0008213	gi|348041203|ref|NP_001101280.2|/5.98422e-180/protein-L-isoaspartate O-methyltransferase domain-containing protein 2 [Rattus norvegicus]
ENSRNOG00000005331	Vapb	-2.7547	0.847081	K10707|1|5e-124|446|rno:60431|vesicle-associated membrane protein-associated protein B	GO:0031224//intrinsic to membrane;GO:0043231//intracellular membrane-bounded organelle;GO:0031090//organelle membrane	GO:0042802//identical protein binding;GO:0046983//protein dimerization activity;GO:0015631//tubulin binding	GO:0051704;GO:0006643//membrane lipid metabolic process;GO:0045069//regulation of viral genome replication;GO:0006984//ER-nucleus signaling pathway	gi|11177880|ref|NP_068619.1|/3.75325e-123/vesicle-associated membrane protein-associated protein B [Rattus norvegicus]
ENSRNOG00000038951	Cox17	3.19547	0.882571	K02260|1|2e-19|94.7|ptr:100609675|cytochrome c oxidase assembly protein subunit 17	GO:0005740//mitochondrial envelope	GO:0005507//copper ion binding;GO:0030234//enzyme regulator activity	GO:0007417//central nervous system development;GO:0044237//cellular metabolic process;GO:0048513//organ development;GO:0000041//transition metal ion transport	gi|74138622|dbj|BAE27132.1|/1.37245e-18/unnamed protein product [Mus musculus]
ENSRNOG00000007111	Nrd1	-2.49346	0.8499	K01411|1|0.0|2189|aml:100480818|nardilysin [EC:3.4.24.61]	GO:0044444//cytoplasmic part;GO:0043231//intracellular membrane-bounded organelle;GO:0044444//cytoplasmic part	GO:0046914//transition metal ion binding;GO:0019838//growth factor binding;GO:0016787//hydrolase activity;GO:0004175//endopeptidase activity;GO:0046914//transition metal ion binding;GO:0019838//growth factor binding	GO:0048741//skeletal muscle fiber development;GO:0048870//cell motility;GO:0019538//protein metabolic process;GO:0031331;GO:0052547//regulation of peptidase activity;GO:0048741//skeletal muscle fiber development;GO:0048870//cell motility;GO:0019538//protein metabolic process;GO:0031331;GO:0052547//regulation of peptidase activity	gi|149035699|gb|EDL90380.1|/0/nardilysin, N-arginine dibasic convertase 1 [Rattus norvegicus]
ENSRNOG00000014013	Map4k4	4.01155	0.869822	K04407|1|0.0|1253|rno:301363|mitogen-activated protein kinase kinase kinase kinase 4 [EC:2.7.11.1]	-	GO:0004672//protein kinase activity;GO:0030695//GTPase regulator activity;GO:0032559	GO:0019222//regulation of metabolic process;GO:0006464//cellular protein modification process;GO:0006796//phosphate-containing compound metabolic process;GO:0043408//regulation of MAPK cascade	gi|157819181|ref|NP_001100374.1|/0/mitogen-activated protein kinase kinase kinase kinase 4 [Rattus norvegicus]
ENSRNOG00000002928	Guk1	-2.52974	0.856695	K00942|1|7e-120|430|rno:303179|guanylate kinase [EC:2.7.4.8]	GO:0044444//cytoplasmic part	GO:0016776//phosphotransferase activity, phosphate group as acceptor;GO:0032559	GO:0009117//nucleotide metabolic process	gi|226874873|ref|NP_001013133.2|/5.4099e-119/guanylate kinase [Rattus norvegicus]
ENSRNOG00000016031	Bicd2	-2.35392	0.85051	K11498|1|4e-19|98.6|mdo:100013897|centromeric protein E;K10421|5|4e-17|92.0|tgu:100219895|CAP-Gly domain-containing linker protein 1	GO:0031982//vesicle;GO:0043232;GO:0043231//intracellular membrane-bounded organelle;GO:0016020//membrane	GO:0005083//small GTPase regulator activity;GO:0005488//binding	GO:0019222//regulation of metabolic process;GO:0034453//microtubule anchoring;GO:0072384//organelle transport along microtubule	gi|76008363|ref|NP_001028846.1|/0/bicaudal D homolog 2 isoform 1 [Rattus norvegicus]
ENSRNOG00000003917	Uck2	-2.25619	0.841601	K00876|1|7e-117|421|rno:304944|uridine kinase [EC:2.7.1.48]	GO:0044444//cytoplasmic part	GO:0019206//nucleoside kinase activity;GO:0032559	GO:0006796//phosphate-containing compound metabolic process;GO:0009611//response to wounding;GO:0009174;GO:0070482//response to oxygen levels;GO:0009112;GO:0007610//behavior;GO:0070646//protein modification by small protein removal;GO:0008655//pyrimidine-containing compound salvage	gi|156151450|ref|NP_001095878.1|/5.32064e-116/uridine-cytidine kinase 2 [Rattus norvegicus]
ENSRNOG00000001442	Por	3.88145	0.891028	K00327|1|0.0|1343|rno:29441|NADPH-ferrihemoprotein reductase [EC:1.6.2.4]	GO:0043231//intracellular membrane-bounded organelle;GO:0031090//organelle membrane	GO:0046914//transition metal ion binding;GO:0005515//protein binding;GO:0000166//nucleotide binding;GO:0016675;GO:0050662//coenzyme binding;GO:0016653//oxidoreductase activity, acting on NADH or NADPH, heme protein as acceptor	GO:0010893//positive regulation of steroid biosynthetic process;GO:0002062//chondrocyte differentiation;GO:0032768;GO:0008203//cholesterol metabolic process;GO:0009698//phenylpropanoid metabolic process;GO:0006475//internal protein amino acid acetylation;GO:0006730//one-carbon metabolic process;GO:0006631//fatty acid metabolic process;GO:0006520//cellular amino acid metabolic process;GO:0006915//…	gi|13928780|ref|NP_113764.1|/0/NADPH--cytochrome P450 reductase [Rattus norvegicus]
ENSRNOG00000050315	Dcxr	3.54006	0.859651	K03331|1|3e-123|441|rno:171408|L-xylulose reductase [EC:1.1.1.10];K00081|4|2e-106|385|bta:782391|carbonyl reductase 2 [EC:1.1.1.184]	GO:0030141//secretory granule;GO:0016020//membrane;GO:0042995//cell projection	GO:0005488//binding;GO:0016616//oxidoreductase activity, acting on the CH-OH group of donors, NAD or NADP as acceptor	GO:0019321//pentose metabolic process;GO:0046496//nicotinamide nucleotide metabolic process;GO:0019318//hexose metabolic process	gi|19705501|ref|NP_599214.1|/2.52395e-122/L-xylulose reductase [Rattus norvegicus]
ENSRNOG00000014234	Hif1an	-2.55902	0.824677	K00476|1|0.0|686|rno:309434|aspartate beta-hydroxylase [EC:1.14.11.16]	GO:0043231//intracellular membrane-bounded organelle	GO:0016706//oxidoreductase activity, acting on paired donors, with incorporation or reduction of molecular oxygen, 2-oxoglutarate as one donor, and incorporation of one atom each of oxygen into both donors;GO:0043169//cation binding;GO:0016701//oxidoreductase activity, acting on single donors with incorporation of molecular oxygen	GO:0008152//metabolic process	gi|198278531|ref|NP_001107221.1|/0/hypoxia-inducible factor 1-alpha inhibitor [Rattus norvegicus]
ENSRNOG00000021314	Fdft1	3.76807	0.890649	K00801|1|0.0|845|rno:29580|farnesyl-diphosphate farnesyltransferase [EC:2.5.1.21]	GO:0031090//organelle membrane;GO:0043231//intracellular membrane-bounded organelle;GO:0031224//intrinsic to membrane	GO:0005488//binding;GO:0004311//farnesyltranstransferase activity	GO:0006694//steroid biosynthetic process;GO:0006720//isoprenoid metabolic process;GO:0006644//phospholipid metabolic process;GO:0008203//cholesterol metabolic process	gi|9506591|ref|NP_062111.1|/0/squalene synthase [Rattus norvegicus]
ENSRNOG00000011592	Lrp10	3.67056	0.862743	K06233|1|2e-16|89.0|cel:F29D11.1|low density lipoprotein-related protein 2	GO:0012505//endomembrane system;GO:0031224//intrinsic to membrane	GO:0004871//signal transducer activity;GO:0030169//low-density lipoprotein particle binding	GO:0010876;GO:0016192//vesicle-mediated transport;GO:0044238//primary metabolic process;GO:0023052//signaling	gi|83649705|ref|NP_001032866.1|/0/low-density lipoprotein receptor-related protein 10 precursor [Rattus norvegicus]
ENSRNOG00000039567	Trmt10c	3.96703	0.877175	K15445|1|8e-20|100|api:100160361|tRNA (guanine9-N1)-methyltransferase [EC:2.1.1.221]	GO:0043231//intracellular membrane-bounded organelle	GO:0016741	GO:0006399//tRNA metabolic process;GO:0006730//one-carbon metabolic process	gi|56605752|ref|NP_001008338.1|/0/mitochondrial ribonuclease P protein 1 precursor [Rattus norvegicus]
ENSRNOG00000018564	Nup93	-2.44255	0.809972	K14309|1|0.0|1539|rno:291874|nuclear pore complex protein Nup93	GO:0005635//nuclear envelope	GO:0005488//binding	GO:0050658//RNA transport;GO:0015758//glucose transport;GO:0044238//primary metabolic process	gi|58865420|ref|NP_001011925.1|/0/nuclear pore complex protein Nup93 [Rattus norvegicus]
ENSRNOG00000019214	Rbx1	-2.18688	0.855233	K03868|1|3e-64|243|aml:100469702|RING-box protein 1	GO:0080008//Cul4-RING ubiquitin ligase complex;GO:0000153//cytoplasmic ubiquitin ligase complex;GO:0000152//nuclear ubiquitin ligase complex	GO:0046914//transition metal ion binding;GO:0019787//small conjugating protein ligase activity;GO:0031369//translation initiation factor binding	GO:0043161//proteasomal ubiquitin-dependent protein catabolic process;GO:0006259//DNA metabolic process;GO:0032446//protein modification by small protein conjugation;GO:0051704;GO:0033554//cellular response to stress	gi|32425477|gb|AAH17370.2|/1.87146e-63/RBX1 protein [Homo sapiens]
ENSRNOG00000012640	Dpp7	3.76429	0.866267	K01276|1|0.0|969|rno:83799|dipeptidyl-peptidase II [EC:3.4.14.2]	GO:0000323//lytic vacuole;GO:0031410//cytoplasmic vesicle	GO:0005488//binding;GO:0008238//exopeptidase activity	GO:0019538//protein metabolic process	gi|14010871|ref|NP_114179.1|/0/dipeptidyl peptidase 2 precursor [Rattus norvegicus]
ENSRNOG00000009754	Nampt	3.82991	0.901925	K03462|1|0.0|978|rno:297508|nicotinamide phosphoribosyltransferase [EC:2.4.2.12]	GO:0043231//intracellular membrane-bounded organelle;GO:0044444//cytoplasmic part	GO:0016763//transferase activity, transferring pentosyl groups;GO:0042802//identical protein binding;GO:0005102//receptor binding	GO:0009888//tissue development;GO:0007169//transmembrane receptor protein tyrosine kinase signaling pathway;GO:0019359;GO:0008284//positive regulation of cell proliferation;GO:0007154//cell communication;GO:0022414//reproductive process;GO:0010557//positive regulation of macromolecule biosynthetic process;GO:0010033//response to organic substance;GO:0009820//alkaloid metabolic process	gi|148704942|gb|EDL36889.1|/0/pre-B-cell colony-enhancing factor 1 [Mus musculus]
ENSRNOG00000042044	Stard3	-2.79253	0.82434	-	GO:0005770//late endosome;GO:0031224//intrinsic to membrane	GO:0032934//sterol binding;GO:0015248//sterol transporter activity	GO:0046907//intracellular transport;GO:0015918//sterol transport;GO:0016125//sterol metabolic process	gi|62079193|ref|NP_001014251.1|/0/stAR-related lipid transfer protein 3 [Rattus norvegicus]
ENSRNOG00000008630	Psma7	3.80075	0.899116	K02731|1|4e-120|431|rno:29674|20S proteasome subunit alpha 4 [EC:3.4.25.1]	GO:0043231//intracellular membrane-bounded organelle;GO:0005839//proteasome core complex	GO:0004175//endopeptidase activity;GO:0005515//protein binding	GO:0043161//proteasomal ubiquitin-dependent protein catabolic process;GO:0051320//S phase;GO:0007050//cell cycle arrest;GO:0016070//RNA metabolic process;GO:0051439//regulation of ubiquitin-protein ligase activity involved in mitotic cell cycle;GO:0006520//cellular amino acid metabolic process;GO:0006915//apoptotic process;GO:0030330//DNA damage response, signal transduction by p53 class mediator…	gi|1346784|sp|P48004.1|PSA7_RAT/3.50229e-123/RecName: Full=Proteasome subunit alpha type-7; AltName: Full=Proteasome subunit RC6-1
ENSRNOG00000007267	Mnat1	-2.4332	0.817429	K10842|1|1e-164|579|rno:266713|CDK-activating kinase assembly factor MAT1	GO:0005667//transcription factor complex	GO:0046914//transition metal ion binding;GO:0005515//protein binding;GO:0004674//protein serine/threonine kinase activity;GO:0042623//ATPase activity, coupled	GO:0006357//regulation of transcription from RNA polymerase II promoter;GO:0007507//heart development;GO:0006397//mRNA processing;GO:0006352//DNA-dependent transcription, initiation;GO:0006796//phosphate-containing compound metabolic process;GO:0051320//S phase;GO:0006353//DNA-dependent transcription, termination;GO:0051318//G1 phase;GO:0006289//nucleotide-excision repair;GO:0008284//positive reg…	gi|148704566|gb|EDL36513.1|/3.22659e-166/menage a trois 1 [Mus musculus]
