# Supplementary material for: Genome-Wide Expression Profiling of Anoxia/Reoxygenation in Rat Cardiomyocytes Uncovers the Role of MitoKATP in Energy Homeostasis
Source: Oxid Med Cell Longev. 2015 Jun 15;2015:756576. doi: 10.1155/2015/756576 (PMC4485557; doi:10.1155/2015/756576)
Supplement: Supplementary file 1 — Excel 1: Raw data of the expression of all the gene (4 groups × 3 replicates of the sequencing) . Excel 2: Significant differently expressed genes from Control versus A/R. Excel 3: Significant differently expressed genes from A/R versus DZ. Excel 4: Significant differently expressed genes from DZ versus DZ5HD. Supplementary Figure 1: Assessment of the DGE saturation degree. Supplementary Table 1: The raw data of DGE profile of 12 sequencings. Supplementary Table 2: DEGs significantly enriched GO terms from Control vs A/R (P<0.05). Supplementary Table 3: DEGs significantly enriched GO terms from A/R vs DZ (P<0.05). Supplementary Table 4: DEGs significantly enriched GO terms from DZ vs DZ5HD (P<0.05). Supplementary Table 5: Significantly enriched pathways for DEGs from Con vs A/R (P<0.01). Supplementary Table 6: Significantly enriched pathways for DEGs from A/R vs DZ (P<0.01). Supplementary Table 7: Significantly enriched pathways for DEGs from DZ vs DZ5HD (P<0.01). [file 756576.f1.zip › Excel4í¬í¬significant DEGs (DZ-VS-DZ5HD).xlsx]

## Sheet: Excel4——significant DEGs (DZ-VS
GeneID	GeneName	log2Ratio(DZ5HD/DZ)	Qvalue	KEGG Orthology	GO Component	GO Function	GO Process	Blast nr
ENSRNOG00000012772	Nqo1	-2.76207	0.867741	K00355|1|7e-149|527|rno:24314|NAD(P)H dehydrogenase (quinone) [EC:1.6.5.2]	GO:0044444//cytoplasmic part	GO:0016655//oxidoreductase activity, acting on NADH or NADPH, quinone or similar compound as acceptor;GO:0016653//oxidoreductase activity, acting on NADH or NADPH, heme protein as acceptor;GO:0048037//cofactor binding	GO:0043065//positive regulation of apoptotic process;GO:0044092//negative regulation of molecular function;GO:0006520//cellular amino acid metabolic process;GO:0042221//response to chemical stimulus;GO:0044271//cellular nitrogen compound biosynthetic process;GO:0007268//synaptic transmission;GO:0006950//response to stress	gi|27501444|ref|NP_058696.2|/6.02508e-148/NAD(P)H dehydrogenase [quinone] 1 [Rattus norvegicus]
ENSRNOG00000001214	Pfkl	2.84476	0.832554	K00850|1|0.0|1528|rno:25741|6-phosphofructokinase [EC:2.7.1.11]	GO:0043234//protein complex;GO:0044444//cytoplasmic part	GO:0043169//cation binding;GO:0070061//fructose binding;GO:0008443//phosphofructokinase activity;GO:0019899//enzyme binding;GO:0019203//carbohydrate phosphatase activity;GO:0032559	GO:0006007//glucose catabolic process;GO:0050796//regulation of insulin secretion;GO:0009746;GO:0051260//protein homooligomerization;GO:0016310//phosphorylation;GO:0006000//fructose metabolic process	gi|6981352|ref|NP_037322.1|/0/6-phosphofructokinase, liver type [Rattus norvegicus]
ENSRNOG00000007673	Ppig	1.86478	0.824086	K09566|1|7e-166|585|rno:83624|peptidyl-prolyl isomerase G (cyclophilin G) [EC:5.2.1.8]	GO:0034399//nuclear periphery	GO:0016859//cis-trans isomerase activity	GO:0008152//metabolic process	gi|13929124|ref|NP_113981.1|/6.065e-165/peptidyl-prolyl cis-trans isomerase G [Rattus norvegicus]
ENSRNOG00000008163	Atp6v1g1	2.4528	0.863728	K02152|1|6e-44|178|rno:298103|V-type H+-transporting ATPase subunit G [EC:3.6.3.14]	GO:0005774//vacuolar membrane;GO:0005764//lysosome;GO:0030136//clathrin-coated vesicle	GO:0019899//enzyme binding;GO:0015662//ATPase activity, coupled to transmembrane movement of ions, phosphorylative mechanism	GO:0006818//hydrogen transport;GO:0015031//protein transport;GO:0007169//transmembrane receptor protein tyrosine kinase signaling pathway;GO:0008152//metabolic process;GO:0006875//cellular metal ion homeostasis	gi|157820847|ref|NP_001100130.1|/4.47922e-43/V-type proton ATPase subunit G 1 [Rattus norvegicus]
ENSRNOG00000028302	Smarcb1	2.18766	0.837852	K11648|1|0.0|735|xla:100505439|SWI/SNF-related matrix-associated actin-dependent regulator of chromatin subfamily B member 1	GO:0070603;GO:0001739//sex chromatin	GO:0005515//protein binding	GO:0048731;GO:0019079//viral genome replication;GO:0008283//cell proliferation;GO:0001824//blastocyst development;GO:0006259//DNA metabolic process;GO:0048869//cellular developmental process;GO:0051704;GO:0043388//positive regulation of DNA binding;GO:0016568//chromatin modification	gi|55956801|ref|NP_001007469.1|/0/SWI/SNF-related matrix-associated actin-dependent regulator of chromatin subfamily B member 1 isoform b [Homo sapiens]
ENSRNOG00000043192	Ptpla	-2.0673	0.84079	K10703|1|8e-114|409|rno:680115|3-hydroxy acyl-CoA dehydratase [EC:4.2.1.-]	GO:0031224//intrinsic to membrane;GO:0043231//intracellular membrane-bounded organelle;GO:0031090//organelle membrane	GO:0004721//phosphoprotein phosphatase activity	GO:0006631//fatty acid metabolic process;GO:0023052//signaling;GO:0032501//multicellular organismal process;GO:0006464//cellular protein modification process	gi|354482481|ref|XP_003503426.1|/8.13102e-115/PREDICTED: 3-hydroxyacyl-CoA dehydratase 1-like, partial [Cricetulus griseus]
ENSRNOG00000017254	Nsun2	2.11653	0.821443	K15335|1|0.0|1561|rno:361191|tRNA (cytosine34-C5)-methyltransferase [EC:2.1.1.203]	GO:0031981//nuclear lumen	GO:0016427//tRNA (cytosine) methyltransferase activity;GO:0003723//RNA binding	GO:0006399//tRNA metabolic process;GO:0001510//RNA methylation	gi|157822221|ref|NP_001101873.1|/0/tRNA (cytosine-5-)-methyltransferase NSUN2 [Rattus norvegicus]
ENSRNOG00000005841	Erp44	-2.52486	0.831132	K09582|1|1e-21|106|dre:554998|protein disulfide-isomerase A4 [EC:5.3.4.1]	GO:0044432//endoplasmic reticulum part;GO:0031090//organelle membrane	GO:0016862//intramolecular oxidoreductase activity, interconverting keto- and enol-groups;GO:0005488//binding	GO:0006950//response to stress;GO:0044267//cellular protein metabolic process;GO:0019725//cellular homeostasis	gi|56605938|ref|NP_001008318.1|/0/endoplasmic reticulum resident protein 44 precursor [Rattus norvegicus]
ENSRNOG00000030862	Atp6v1h	2.38579	0.824318	K02144|1|0.0|877|rno:297797|V-type H+-transporting ATPase 54 kD subunit [EC:3.6.3.14]	GO:0016471//vacuolar proton-transporting V-type ATPase complex	GO:0019829//cation-transporting ATPase activity;GO:0005488//binding	GO:0015988//energy coupled proton transmembrane transport, against electrochemical gradient;GO:0015031//protein transport;GO:0009207;GO:0007169//transmembrane receptor protein tyrosine kinase signaling pathway;GO:0016192//vesicle-mediated transport;GO:0050688//regulation of defense response to virus;GO:0051452//intracellular pH reduction;GO:0019222//regulation of metabolic process;GO:0006875//cel…	gi|62078587|ref|NP_001013951.1|/0/V-type proton ATPase subunit H [Rattus norvegicus]
ENSRNOG00000021567	Ppp1r3a	2.08076	0.816609	K07189|1|0.0|2081|rno:500036|protein phosphatase 1, regulatory (inhibitor) subunit 3	GO:0044464//cell part	GO:0004721//phosphoprotein phosphatase activity	GO:0006073//cellular glucan metabolic process	gi|157822901|ref|NP_001102692.1|/0/protein phosphatase 1 regulatory subunit 3A [Rattus norvegicus]
ENSRNOG00000014287	Stk11	2.36323	0.843602	K07298|1|0.0|784|rno:314621|serine/threonine-protein kinase 11 [EC:2.7.11.9]	GO:0032991//macromolecular complex;GO:0043231//intracellular membrane-bounded organelle	GO:0004672//protein kinase activity;GO:0046872//metal ion binding;GO:0019904//protein domain specific binding;GO:0032559	GO:0006094//gluconeogenesis;GO:0051640//organelle localization;GO:0007179//transforming growth factor beta receptor signaling pathway;GO:0016055//Wnt receptor signaling pathway;GO:0010033//response to organic substance;GO:0031346//positive regulation of cell projection organization;GO:0006796//phosphate-containing compound metabolic process;GO:0010627//regulation of intracellular protein kinase c…	gi|347662427|sp|D4AE59.1|STK11_RAT/0/RecName: Full=Serine/threonine-protein kinase STK11; AltName: Full=Liver kinase B1 homolog; Short=LKB1
ENSRNOG00000001889	Comt	1.88061	0.802907	K00545|1|2e-131|469|rno:24267|catechol O-methyltransferase [EC:2.1.1.6]	GO:0043231//intracellular membrane-bounded organelle;GO:0031224//intrinsic to membrane;GO:0044444//cytoplasmic part	GO:0008171//O-methyltransferase activity;GO:0046872//metal ion binding	GO:0008202//steroid metabolic process;GO:0006575//cellular modified amino acid metabolic process;GO:0007611//learning or memory;GO:0033555//multicellular organismal response to stress;GO:0042053//regulation of dopamine metabolic process;GO:0006730//one-carbon metabolic process;GO:0008285//negative regulation of cell proliferation;GO:0042133//neurotransmitter metabolic process;GO:0031337;GO:000223…	gi|6978681|ref|NP_036663.1|/1.9091e-130/catechol O-methyltransferase [Rattus norvegicus]
ENSRNOG00000023647	Aldoa	-3.41538	0.895408	K01623|1|0.0|700|mmu:11674|fructose-bisphosphate aldolase, class I [EC:4.1.2.13]	GO:0031988//membrane-bounded vesicle;GO:0043231//intracellular membrane-bounded organelle;GO:0005856//cytoskeleton;GO:0042995//cell projection	GO:0048029//monosaccharide binding;GO:0016832//aldehyde-lyase activity;GO:0005515//protein binding	GO:0006007//glucose catabolic process;GO:0048545//response to steroid hormone stimulus;GO:0009206;GO:0051260//protein homooligomerization;GO:0019725//cellular homeostasis;GO:0014070//response to organic cyclic compound;GO:0002237//response to molecule of bacterial origin;GO:0006000//fructose metabolic process;GO:0006936//muscle contraction;GO:0006950//response to stress	gi|149067833|gb|EDM17385.1|/0/aldolase A, isoform CRA_e [Rattus norvegicus]
ENSRNOG00000017876	Dnajc21	1.94937	0.837567	K09506|1|2e-155|549|mmu:78244|DnaJ homolog subfamily A member 5	GO:0030529//ribonucleoprotein complex	GO:0046872//metal ion binding;GO:0005515//protein binding	GO:0044267//cellular protein metabolic process	gi|149027325|gb|EDL82992.1|/2.19587e-166/rCG23653 [Rattus norvegicus]
ENSRNOG00000007379	Iah1	2.20163	0.813628	-	-	GO:0016787//hydrolase activity	GO:0006629//lipid metabolic process	gi|198278545|ref|NP_001094010.1|/2.0667e-139/isoamyl acetate-hydrolyzing esterase 1 homolog [Rattus norvegicus]
ENSRNOG00000018566	Ctsl1	2.77316	0.872143	K01365|1|0.0|675|rno:25697|cathepsin L [EC:3.4.22.15]	GO:0000323//lytic vacuole;GO:0009986//cell surface;GO:0016023//cytoplasmic membrane-bounded vesicle;GO:0042995//cell projection;GO:0043025//neuronal cell body	GO:0004175//endopeptidase activity;GO:0008238//exopeptidase activity;GO:0005515//protein binding	GO:0012501//programmed cell death;GO:0031669//cellular response to nutrient levels;GO:0009746;GO:0019538//protein metabolic process;GO:0007399//nervous system development;GO:0048232//male gamete generation;GO:0031960//response to corticosteroid stimulus;GO:0048754//branching morphogenesis of a tube;GO:0008406//gonad development	gi|115743|sp|P07154.2|CATL1_RAT/0/RecName: Full=Cathepsin L1; AltName: Full=Cyclic protein 2; Short=CP-2; AltName: Full=Major excreted protein; Short=MEP; Contains: RecName: Full=Procathepsin L; Contains: RecName: Full=Cathepsin L1 heavy chain; Contains: RecName: Full=Cathepsin L1 light chain; Flags: Precursor
ENSRNOG00000012091	Ppa2	2.1274	0.841159	K01507|1|0.0|672|rno:310856|inorganic pyrophosphatase [EC:3.6.1.1]	GO:0044429//mitochondrial part	GO:0046872//metal ion binding;GO:0016462//pyrophosphatase activity	GO:0006412//translation;GO:0006796//phosphate-containing compound metabolic process	gi|209529636|ref|NP_001129343.1|/0/inorganic pyrophosphatase 2, mitochondrial [Rattus norvegicus]
ENSRNOG00000009845	Acadm	2.49848	0.867088	K00249|1|0.0|846|rno:24158|acyl-CoA dehydrogenase [EC:1.3.99.3]	GO:0005740//mitochondrial envelope	GO:0005515//protein binding;GO:0050662//coenzyme binding;GO:0003995//acyl-CoA dehydrogenase activity	GO:0006094//gluconeogenesis;GO:0035051//cardiac cell differentiation;GO:0006635//fatty acid beta-oxidation;GO:0009437//carnitine metabolic process;GO:0005977//glycogen metabolic process;GO:0006578//amino-acid betaine biosynthetic process;GO:0010038//response to metal ion;GO:0031960//response to corticosteroid stimulus;GO:0006950//response to stress;GO:0051260//protein homooligomerization;GO:00316…	gi|292494885|ref|NP_058682.2|/0/medium-chain specific acyl-CoA dehydrogenase, mitochondrial precursor [Rattus norvegicus]
ENSRNOG00000001245	Pcbp3	-2.62014	0.828004	K13162|1|0.0|657|mmu:59093|poly(rC)-binding protein 2/3/4	GO:0044444//cytoplasmic part;GO:0032991//macromolecular complex;GO:0031981//nuclear lumen	GO:0003676//nucleic acid binding	GO:0016070//RNA metabolic process	gi|149043674|gb|EDL97125.1|/0/rCG61051, isoform CRA_a [Rattus norvegicus]
ENSRNOG00000026455	Gpd1l	-1.78363	0.802475	K00006|1|0.0|701|rno:363159|glycerol-3-phosphate dehydrogenase (NAD+) [EC:1.1.1.8]	GO:0043234//protein complex;GO:0044424//intracellular part	GO:0042802//identical protein binding;GO:0016616//oxidoreductase activity, acting on the CH-OH group of donors, NAD or NADP as acceptor;GO:0048037//cofactor binding;GO:0000166//nucleotide binding	GO:0006072//glycerol-3-phosphate metabolic process	gi|50510357|dbj|BAD32164.1|/0/mKIAA0089 protein [Mus musculus]
ENSRNOG00000016219	Vnn1	2.42439	0.813091	K08069|1|0.0|1049|rno:29142|pantetheine hydrolase [EC:3.5.1.92]	GO:0031224//intrinsic to membrane;GO:0044421//extracellular region part	GO:0016811//hydrolase activity, acting on carbon-nitrogen (but not peptide) bonds, in linear amides;GO:0035091//phosphatidylinositol binding	GO:0006575//cellular modified amino acid metabolic process;GO:0006954//inflammatory response;GO:0007155//cell adhesion;GO:0033077//T cell differentiation in thymus;GO:0043066//negative regulation of apoptotic process	gi|71043730|ref|NP_001020794.1|/0/pantetheinase precursor [Rattus norvegicus]
ENSRNOG00000010370	Tnip1	-2.16958	0.836293	K10352|1|7e-09|63.9|cin:100176948|myosin heavy chain;K06669|2|1e-08|63.2|xtr:100145671|structural maintenance of chromosome 3 (chondroitin sulfate proteoglycan 6)	GO:0044424//intracellular part	GO:0005488//binding	GO:0009100//glycoprotein metabolic process;GO:0045069//regulation of viral genome replication;GO:0006950//response to stress;GO:0010467//gene expression	gi|157818891|ref|NP_001102296.1|/0/TNFAIP3-interacting protein 1 [Rattus norvegicus]
ENSRNOG00000007326	Prepl	2.16588	0.840885	K01322|1|3e-25|117|cqu:CpipJ_CPIJ001894|prolyl oligopeptidase [EC:3.4.21.26]	GO:0044444//cytoplasmic part;GO:0044444//cytoplasmic part	GO:0004175//endopeptidase activity;GO:0004175//endopeptidase activity	GO:0019538//protein metabolic process;GO:0019538//protein metabolic process	gi|166221827|sp|Q5HZA6.2|PPCEL_RAT/0/RecName: Full=Prolyl endopeptidase-like; AltName: Full=Prolylendopeptidase-like
ENSRNOG00000010993	Dpm1	-2.90813	0.832428	K00721|1|2e-145|517|rno:296394|dolichol-phosphate mannosyltransferase [EC:2.4.1.83]	GO:0043231//intracellular membrane-bounded organelle;GO:0031501//mannosyltransferase complex;GO:0031090//organelle membrane	GO:0048029//monosaccharide binding;GO:0000030//mannosyltransferase activity	GO:0006013//mannose metabolic process;GO:0016093;GO:0006497//protein lipidation;GO:0006493//protein O-linked glycosylation;GO:0006487//protein N-linked glycosylation	gi|157818409|ref|NP_001100014.1|/1.44349e-144/dolichol-phosphate mannosyltransferase [Rattus norvegicus]
ENSRNOG00000001274	Vps29	2.22011	0.84614	K07095|1|3e-102|372|rno:288666|	GO:0031090//organelle membrane;GO:0043231//intracellular membrane-bounded organelle	GO:0043169//cation binding;GO:0016791//phosphatase activity	GO:0006810//transport;GO:0006796//phosphate-containing compound metabolic process	gi|71042152|pdb|1Z2W|A/2.79764e-102/Chain A, Crystal Structure Of Mouse Vps29 Complexed With Mn2+
ENSRNOG00000013255	Dnajc8	-1.99928	0.84217	K09528|1|3e-122|439|bta:614259|DnaJ homolog subfamily C member 8	GO:0031981//nuclear lumen	GO:0005515//protein binding	GO:0000377;GO:0044267//cellular protein metabolic process	gi|148698151|gb|EDL30098.1|/2.18704e-123/DnaJ (Hsp40) homolog, subfamily C, member 8, isoform CRA_a [Mus musculus]
ENSRNOG00000006931	Eepd1	2.38792	0.808088	K10260|1|6e-07|57.0|bfo:BRAFLDRAFT_63751|F-box and WD-40 domain protein 7	GO:0031224//intrinsic to membrane	GO:0003676//nucleic acid binding	GO:0006259//DNA metabolic process;GO:0015031//protein transport	gi|50511063|dbj|BAD32517.1|/0/mKIAA1706 protein [Mus musculus]
ENSRNOG00000001653	St3gal6	-2.92345	0.849858	K03792|1|0.0|669|rno:304023|beta-galactoside alpha-2,3-sialyltransferase (sialyltransferase 10) [EC:2.4.99.10]	GO:0031228//intrinsic to Golgi membrane	GO:0016757//transferase activity, transferring glycosyl groups	GO:0006643//membrane lipid metabolic process;GO:0005996//monosaccharide metabolic process;GO:0018065//protein-cofactor linkage	gi|148665765|gb|EDK98181.1|/0/ST3 beta-galactoside alpha-2,3-sialyltransferase 6, isoform CRA_b [Mus musculus]
ENSRNOG00000009893	Uxt	2.10758	0.834692	-	GO:0005815//microtubule organizing center;GO:0043231//intracellular membrane-bounded organelle;GO:0043234//protein complex	GO:0003779//actin binding;GO:0015631//tubulin binding	GO:0031023//microtubule organizing center organization;GO:0044267//cellular protein metabolic process;GO:0034643//establishment of mitochondrion localization, microtubule-mediated	gi|55741553|ref|NP_001006983.1|/6.39381e-70/protein UXT [Rattus norvegicus]
ENSRNOG00000015036	Ctgf	-2.91939	0.874755	K06827|1|0.0|709|rno:64032|connective tissue growth factor	GO:0016020//membrane;GO:0044431//Golgi apparatus part;GO:0031012//extracellular matrix	GO:0019838//growth factor binding;GO:0005102//receptor binding;GO:0005539//glycosaminoglycan binding	GO:0010952//positive regulation of peptidase activity;GO:0009888//tissue development;GO:0045989//positive regulation of striated muscle contraction;GO:0010467//gene expression;GO:0010557//positive regulation of macromolecule biosynthetic process;GO:0006816//calcium ion transport;GO:0007568//aging;GO:0008283//cell proliferation;GO:0016337//cell-cell adhesion;GO:0043627//response to estrogen stimul…	gi|149032916|gb|EDL87771.1|/0/connective tissue growth factor [Rattus norvegicus]
ENSRNOG00000014645	Aldh7a1	2.25053	0.839537	K14085|1|0.0|1046|rno:291450|aldehyde dehydrogenase family 7 member A1 [EC:1.2.1.31 1.2.1.8 1.2.1.3]	GO:0044429//mitochondrial part	GO:0004030//aldehyde dehydrogenase [NAD(P)+] activity	GO:0006553//lysine metabolic process;GO:0050954//sensory perception of mechanical stimulus	gi|402766107|ref|NP_001258034.1|/0/alpha-aminoadipic semialdehyde dehydrogenase [Rattus norvegicus]
ENSRNOG00000017163	Pfkp	-2.23626	0.822844	K00850|1|0.0|1436|rno:60416|6-phosphofructokinase [EC:2.7.1.11]	GO:0043234//protein complex;GO:0044444//cytoplasmic part	GO:0043169//cation binding;GO:0070061//fructose binding;GO:0008443//phosphofructokinase activity;GO:0032559	GO:0006007//glucose catabolic process;GO:0051260//protein homooligomerization;GO:0016310//phosphorylation;GO:0006000//fructose metabolic process	gi|57977273|ref|NP_996729.1|/0/6-phosphofructokinase type C [Rattus norvegicus]
ENSRNOG00000018294	Hspa5	-2.53667	0.867046	K09490|1|0.0|1224|rno:25617|heat shock 70kDa protein 5	GO:0043234//protein complex;GO:0031227//intrinsic to endoplasmic reticulum membrane;GO:0048770	GO:0004869//cysteine-type endopeptidase inhibitor activity;GO:0046872//metal ion binding;GO:0032559;GO:0017111//nucleoside-triphosphatase activity;GO:0043021//ribonucleoprotein complex binding;GO:0019899//enzyme binding	GO:0007179//transforming growth factor beta receptor signaling pathway;GO:0010466//negative regulation of peptidase activity;GO:0001775//cell activation;GO:0006887//exocytosis;GO:0009790//embryo development;GO:0016567//protein ubiquitination;GO:0009207;GO:0030968//endoplasmic reticulum unfolded protein response;GO:0032268//regulation of cellular protein metabolic process;GO:0007599//hemostasis;GO…	gi|25742763|ref|NP_037215.1|/0/78 kDa glucose-regulated protein precursor [Rattus norvegicus]
ENSRNOG00000028341	Alkbh5	-2.46067	0.842686	K10767|1|0.0|727|rno:303193|alkylated DNA repair protein alkB homolog 5 [EC:1.14.11.-]	GO:0031224//intrinsic to membrane	GO:0016701//oxidoreductase activity, acting on single donors with incorporation of molecular oxygen;GO:0043169//cation binding	GO:0008152//metabolic process	gi|347300461|ref|NP_001178572.1|/0/RNA demethylase ALKBH5 [Rattus norvegicus]
ENSRNOG00000009756	Pacsin2	1.85944	0.820716	K10408|1|3e-103|376|tca:664324|dynein heavy chain, axonemal;K12804|2|6e-18|93.6|dre:571331|proline-serine-threonine phosphatase interacting protein 1	GO:0044431//Golgi apparatus part;GO:0031410//cytoplasmic vesicle;GO:0044431//Golgi apparatus part;GO:0031410//cytoplasmic vesicle;GO:0044431//Golgi apparatus part;GO:0031410//cytoplasmic vesicle	GO:0005515//protein binding;GO:0016772//transferase activity, transferring phosphorus-containing groups;GO:0005515//protein binding;GO:0016772//transferase activity, transferring phosphorus-containing groups;GO:0005515//protein binding;GO:0016772//transferase activity, transferring phosphorus-containing groups	GO:0007010//cytoskeleton organization;GO:0006796//phosphate-containing compound metabolic process;GO:0023052//signaling;GO:0030100//regulation of endocytosis;GO:0007010//cytoskeleton organization;GO:0006796//phosphate-containing compound metabolic process;GO:0023052//signaling;GO:0030100//regulation of endocytosis;GO:0007010//cytoskeleton organization;GO:0006796//phosphate-containing compound met…	gi|22256944|sp|Q9QY17.2|PACN2_RAT/0/RecName: Full=Protein kinase C and casein kinase substrate in neurons 2 protein; AltName: Full=Synaptic dynamin-associated protein II; AltName: Full=Syndapin 2; AltName: Full=Syndapin-II; Short=SdpII
ENSRNOG00000001339	PSMD9	-2.50292	0.837757	K06693|1|2e-100|366|rno:161475|26S proteasome non-ATPase regulatory subunit 9	GO:0043231//intracellular membrane-bounded organelle;GO:0005838//proteasome regulatory particle	GO:0003712//transcription cofactor activity;GO:0008134//transcription factor binding	GO:0043161//proteasomal ubiquitin-dependent protein catabolic process;GO:0006357//regulation of transcription from RNA polymerase II promoter;GO:0050796//regulation of insulin secretion;GO:0051320//S phase;GO:0007050//cell cycle arrest;GO:0051439//regulation of ubiquitin-protein ligase activity involved in mitotic cell cycle;GO:0006520//cellular amino acid metabolic process;GO:0006915//apoptotic …	gi|149063326|gb|EDM13649.1|/7.37587e-100/proteasome (prosome, macropain) 26S subunit, non-ATPase, 9, isoform CRA_a [Rattus norvegicus]
ENSRNOG00000006859	Insig1	2.08106	0.847004	-	GO:0043231//intracellular membrane-bounded organelle;GO:0031224//intrinsic to membrane;GO:0031090//organelle membrane	GO:0005488//binding	GO:0045596//negative regulation of cell differentiation;GO:0032868//response to insulin stimulus;GO:0006639//acylglycerol metabolic process;GO:0031327;GO:0006694//steroid biosynthetic process;GO:0008203//cholesterol metabolic process;GO:0043627//response to estrogen stimulus;GO:0042471//ear morphogenesis;GO:0032933//SREBP signaling pathway;GO:0006950//response to stress;GO:0033993//response to li…	gi|11693162|ref|NP_071787.1|/1.60654e-125/insulin-induced gene 1 protein [Rattus norvegicus]
ENSRNOG00000049560	Glul	-2.79034	0.860158	K01915|1|0.0|788|rno:24957|glutamine synthetase [EC:6.3.1.2]	GO:0032991//macromolecular complex;GO:0043025//neuronal cell body;GO:0033267//axon part;GO:0005783//endoplasmic reticulum	GO:0046914//transition metal ion binding;GO:0045502//dynein binding;GO:0016597//amino acid binding;GO:0032559;GO:0016211//ammonia ligase activity;GO:0016831//carboxy-lyase activity	GO:0006541//glutamine metabolic process;GO:0050796//regulation of insulin secretion;GO:0008284//positive regulation of cell proliferation;GO:0051259//protein oligomerization;GO:0009746;GO:0001505//regulation of neurotransmitter levels;GO:0006536//glutamate metabolic process;GO:0050806//positive regulation of synaptic transmission	gi|142349612|ref|NP_058769.4|/0/glutamine synthetase [Rattus norvegicus]
ENSRNOG00000003253	Qdpr	2.42857	0.841801	K00357|1|2e-126|452|rno:64192|dihydropteridine reductase [EC:1.5.1.34]	GO:0043231//intracellular membrane-bounded organelle;GO:0044444//cytoplasmic part	GO:0051287//NAD binding;GO:0016646//oxidoreductase activity, acting on the CH-NH group of donors, NAD or NADP as acceptor;GO:0042802//identical protein binding;GO:0050661//NADP binding	GO:0006558//L-phenylalanine metabolic process;GO:0010038//response to metal ion;GO:0009108//coenzyme biosynthetic process;GO:0042558//pteridine-containing compound metabolic process;GO:0043434//response to peptide hormone stimulus;GO:0042493//response to drug	gi|149047261|gb|EDL99930.1|/4.92055e-138/quinoid dihydropteridine reductase, isoform CRA_a [Rattus norvegicus]
ENSRNOG00000010134	Acot2	-1.38173	0.807688	K01068|1|0.0|854|rno:192272|palmitoyl-CoA hydrolase [EC:3.1.2.2]	GO:0044429//mitochondrial part	GO:0005488//binding	GO:0000038//very long-chain fatty acid metabolic process;GO:0009719;GO:0042221//response to chemical stimulus;GO:0009991//response to extracellular stimulus;GO:0006732//coenzyme metabolic process;GO:0006950//response to stress	gi|48675862|ref|NP_620262.2|/0/acyl-coenzyme A thioesterase 2, mitochondrial [Rattus norvegicus]
ENSRNOG00000003289	Lap3	2.28995	0.840053	K11142|1|0.0|971|rno:289668|cytosol aminopeptidase [EC:3.4.11.1 3.4.11.5]	GO:0044431//Golgi apparatus part;GO:0031981//nuclear lumen;GO:0044431//Golgi apparatus part;GO:0031981//nuclear lumen	GO:0046914//transition metal ion binding;GO:0008238//exopeptidase activity;GO:0008237//metallopeptidase activity;GO:0046914//transition metal ion binding;GO:0008238//exopeptidase activity;GO:0008237//metallopeptidase activity	GO:0019538//protein metabolic process;GO:0019538//protein metabolic process	gi|58865398|ref|NP_001011910.1|/0/cytosol aminopeptidase [Rattus norvegicus]
ENSRNOG00000003980	Ttc1	-1.96461	0.832375	K09527|1|8e-18|92.4|dre:100535346|DnaJ homolog subfamily C member 7	-	GO:0005515//protein binding	GO:0044267//cellular protein metabolic process	gi|53850588|ref|NP_001005529.1|/2.9575e-155/tetratricopeptide repeat protein 1 [Rattus norvegicus]
ENSRNOG00000002914	Trmt1	2.85615	0.853449	K00555|1|0.0|885|rno:288914|tRNA (guanine26-N2/guanine27-N2)-dimethyltransferase [EC:2.1.1.215 2.1.1.216]	-	GO:0008170//N-methyltransferase activity	GO:0006399//tRNA metabolic process	gi|62078475|ref|NP_001013892.1|/0/N(2),N(2)-dimethylguanosine tRNA methyltransferase [Rattus norvegicus]
ENSRNOG00000016866	Fhl2	-2.47293	0.863655	K14380|1|0.0|633|rno:63839|four and a half LIM domains protein 2	GO:0043231//intracellular membrane-bounded organelle;GO:0005856//cytoskeleton;GO:0031672//A band;GO:0005924//cell-substrate adherens junction;GO:0031674//I band	GO:0003712//transcription cofactor activity;GO:0046914//transition metal ion binding;GO:0035258//steroid hormone receptor binding	GO:0006629//lipid metabolic process;GO:0009719;GO:0006355//regulation of transcription, DNA-dependent;GO:0030518//intracellular steroid hormone receptor signaling pathway	gi|13928940|ref|NP_113865.1|/3.41926e-180/four and a half LIM domains protein 2 [Rattus norvegicus]
ENSRNOG00000022664	Kat7	-2.681	0.839705	K11307|1|0.0|961|hsa:11143|histone acetyltransferase MYST2 [EC:2.3.1.48]	GO:0043234//protein complex;GO:0031981//nuclear lumen	GO:0004468//lysine N-acetyltransferase activity;GO:0046914//transition metal ion binding;GO:0001071//nucleic acid binding transcription factor activity	GO:0043967//histone H4 acetylation;GO:0006259//DNA metabolic process;GO:0006351//transcription, DNA-dependent	gi|29650457|gb|AAO86770.1|/0/histone acetyltransferase [Rattus norvegicus]
ENSRNOG00000018077	Agpat6	2.4718	0.825635	K13506|1|0.0|848|rno:290843|glycerol-3-phosphate O-acyltransferase 3/4 [EC:2.3.1.15]	GO:0031227//intrinsic to endoplasmic reticulum membrane	GO:0016411//acylglycerol O-acyltransferase activity	GO:0032787//monocarboxylic acid metabolic process;GO:0006641//triglyceride metabolic process;GO:0002068;GO:0046470//phosphatidylcholine metabolic process;GO:0035264//multicellular organism growth;GO:0048732//gland development;GO:0007589//body fluid secretion;GO:0006732//coenzyme metabolic process	gi|114326232|ref|NP_001041314.1|/0/glycerol-3-phosphate acyltransferase 6 [Rattus norvegicus]
ENSRNOG00000012957	Sh3glb1	-2.83798	0.869816	K11248|1|0.0|675|rno:292156|endophilin-B	GO:0032991//macromolecular complex;GO:0031966//mitochondrial membrane;GO:0012505//endomembrane system	GO:0030674//protein binding, bridging;GO:0019904//protein domain specific binding;GO:0042802//identical protein binding;GO:0008289//lipid binding;GO:0071617//lysophospholipid acyltransferase activity	GO:0006458//'de novo' protein folding;GO:0046394;GO:0030035//microspike assembly;GO:0023052//signaling;GO:0006917//induction of apoptosis;GO:0006644//phospholipid metabolic process;GO:0043066//negative regulation of apoptotic process	gi|50510503|dbj|BAD32237.1|/0/mKIAA0491 protein [Mus musculus]
ENSRNOG00000012210	Sptlc2	2.33975	0.838631	K00654|1|0.0|1088|rno:366697|serine palmitoyltransferase [EC:2.3.1.50]	GO:0031224//intrinsic to membrane;GO:0031211//endoplasmic reticulum palmitoyltransferase complex	GO:0016454;GO:0048037//cofactor binding	GO:0006684//sphingomyelin metabolic process;GO:0006667//sphinganine metabolic process;GO:0006670//sphingosine metabolic process;GO:0006672//ceramide metabolic process	gi|79749411|ref|NP_001032174.1|/0/serine palmitoyltransferase 2 [Rattus norvegicus]
ENSRNOG00000003653	Fh	2.55728	0.866108	K01679|1|0.0|976|rno:24368|fumarate hydratase, class II [EC:4.2.1.2]	GO:0043234//protein complex;GO:0044459//plasma membrane part;GO:0044429//mitochondrial part	GO:0016836//hydro-lyase activity	GO:0009060//aerobic respiration;GO:0001894//tissue homeostasis;GO:0043648//dicarboxylic acid metabolic process	gi|158186722|ref|NP_058701.2|/0/fumarate hydratase, mitochondrial precursor [Rattus norvegicus]
ENSRNOG00000000796	Ranbp2	-2.1499	0.832164	K12172|1|0.0|5881|rno:294429|E3 SUMO-protein ligase RanBP2	GO:0005635//nuclear envelope;GO:0005635//nuclear envelope	GO:0003824//catalytic activity;GO:0003824//catalytic activity	GO:0050658//RNA transport;GO:0044267//cellular protein metabolic process;GO:0050658//RNA transport;GO:0044267//cellular protein metabolic process	gi|300797934|ref|NP_001178533.1|/0/E3 SUMO-protein ligase RanBP2 [Rattus norvegicus]
ENSRNOG00000012100	Ssbp1	-2.08365	0.847825	K03111|1|7e-81|298|rno:54304|single-strand DNA-binding protein	GO:0031981//nuclear lumen;GO:0005759//mitochondrial matrix	GO:0043566//structure-specific DNA binding	GO:0051095;GO:0006259//DNA metabolic process;GO:0007005//mitochondrion organization	gi|34328536|ref|NP_899157.1|/4.76204e-80/single-stranded DNA-binding protein, mitochondrial precursor [Rattus norvegicus]
ENSRNOG00000001733	Ppp1r2	-2.38203	0.855071	K12489|1|4e-23|108|ssc:100623422|Arf-GAP with coiled-coil, ANK repeat and PH domain-containing protein;K14809|2|2e-16|86.3|tca:658811|ATP-dependent RNA helicase DDX55/SPB4 [EC:3.6.4.13]	-	GO:0005488//binding;GO:0004864//protein phosphatase inhibitor activity	GO:0010921//regulation of phosphatase activity;GO:0006073//cellular glucan metabolic process;GO:0007165//signal transduction	gi|41281691|ref|NP_620178.1|/1.04655e-106/protein phosphatase inhibitor 2 [Rattus norvegicus]
ENSRNOG00000043387	Cpe	2.13114	0.854818	K01294|1|0.0|699|rno:25669|carboxypeptidase E [EC:3.4.17.10]	GO:0016023//cytoplasmic membrane-bounded vesicle;GO:0016020//membrane;GO:0044421//extracellular region part	GO:0046914//transition metal ion binding;GO:0008235//metalloexopeptidase activity	GO:0007186//G-protein coupled receptor signaling pathway;GO:0016486//peptide hormone processing;GO:0003208//cardiac ventricle morphogenesis;GO:0043412//macromolecule modification;GO:0044237//cellular metabolic process	gi|55249691|gb|AAH85762.1|/0/Carboxypeptidase E [Rattus norvegicus]
ENSRNOG00000003307	Gcdh	2.76569	0.860063	K00252|1|0.0|869|rno:364975|glutaryl-CoA dehydrogenase [EC:1.3.99.7]	GO:0019866//organelle inner membrane;GO:0043231//intracellular membrane-bounded organelle	GO:0003995//acyl-CoA dehydrogenase activity;GO:0050662//coenzyme binding;GO:0005504//fatty acid binding	GO:0006631//fatty acid metabolic process;GO:0035337	gi|157820807|ref|NP_001102366.1|/0/glutaryl-CoA dehydrogenase, mitochondrial [Rattus norvegicus]
ENSRNOG00000000279	Rtn4ip1	-2.80306	0.826077	K00344|1|2e-17|92.0|tgu:100226702|NADPH2:quinone reductase [EC:1.6.5.5];K10133|3|2e-17|91.7|hmg:100208988|tumor protein p53-inducible protein 3 [EC:1.-.-.-]	GO:0043231//intracellular membrane-bounded organelle	GO:0046914//transition metal ion binding;GO:0003824//catalytic activity	GO:0008152//metabolic process	gi|157821769|ref|NP_001101114.1|/0/reticulon 4 interacting protein 1 [Rattus norvegicus]
ENSRNOG00000019983	Mlx	1.93012	0.819863	K09113|1|9e-153|541|rno:360631|MAX-like protein X	GO:0043231//intracellular membrane-bounded organelle	GO:0003676//nucleic acid binding;GO:0042802//identical protein binding;GO:0001071//nucleic acid binding transcription factor activity;GO:0046983//protein dimerization activity	GO:0009893//positive regulation of metabolic process;GO:0006355//regulation of transcription, DNA-dependent;GO:0015980//energy derivation by oxidation of organic compounds;GO:0051169//nuclear transport	gi|77627983|ref|NP_001029284.1|/7.57903e-152/transcription factor-like 4 [Rattus norvegicus]
ENSRNOG00000002642	Ptges3	-2.1362	0.85247	K15730|1|9e-112|404|ssc:100155956|cytosolic prostaglandin-E synthase [EC:5.3.99.3]	GO:0044427//chromosomal part;GO:0044444//cytoplasmic part;GO:0030529//ribonucleoprotein complex	GO:0003964//RNA-directed DNA polymerase activity;GO:0016860//intramolecular oxidoreductase activity;GO:0005515//protein binding	GO:0006693//prostaglandin metabolic process;GO:0042026//protein refolding;GO:0006259//DNA metabolic process;GO:0009058//biosynthetic process;GO:0008544//epidermis development;GO:0005977//glycogen metabolic process;GO:0031958	gi|148692593|gb|EDL24540.1|/3.04509e-123/prostaglandin E synthase 3 (cytosolic), isoform CRA_b [Mus musculus]
ENSRNOG00000032487	Sts	2.4047	0.830363	K01131|1|0.0|1134|rno:24800|steryl-sulfatase [EC:3.1.6.2]	GO:0031224//intrinsic to membrane;GO:0043231//intracellular membrane-bounded organelle;GO:0031090//organelle membrane;GO:0012505//endomembrane system	GO:0043169//cation binding;GO:0008484//sulfuric ester hydrolase activity	GO:0006629//lipid metabolic process;GO:0048545//response to steroid hormone stimulus;GO:0009628//response to abiotic stimulus;GO:0008544//epidermis development;GO:0022414//reproductive process;GO:0007610//behavior;GO:0008283//cell proliferation	gi|149042368|gb|EDL96075.1|/0/steroid sulfatase [Rattus norvegicus]
ENSRNOG00000030408	Dnajb12	-2.00616	0.818452	K09518|1|0.0|664|rno:294513|DnaJ homolog subfamily B member 12	GO:0031224//intrinsic to membrane;GO:0043231//intracellular membrane-bounded organelle	GO:0005515//protein binding	GO:0044267//cellular protein metabolic process	gi|344274603|ref|XP_003409104.1|/0/PREDICTED: dnaJ homolog subfamily B member 12-like [Loxodonta africana]
ENSRNOG00000029042	MT-ND6	-3.9543	0.915092	K03884|1|8e-81|299|rno:26203|NADH-ubiquinone oxidoreductase chain 6 [EC:1.6.5.3]	GO:0031224//intrinsic to membrane;GO:0043231//intracellular membrane-bounded organelle	GO:0050136//NADH dehydrogenase (quinone) activity	GO:0008152//metabolic process	gi|110189726|ref|YP_665640.1|/5.27255e-80/NADH dehydrogenase subunit 6 [Rattus norvegicus]
ENSRNOG00000019229	Fbl	-2.63647	0.853502	K14563|1|3e-136|485|rno:292747|rRNA 2'-O-methyltransferase fibrillarin [EC:2.1.1.-]	GO:0016604//nuclear body;GO:0044452;GO:0005732//small nucleolar ribonucleoprotein complex	GO:0003723//RNA binding;GO:0016741	GO:0006730//one-carbon metabolic process;GO:0042254//ribosome biogenesis;GO:0006399//tRNA metabolic process;GO:0010467//gene expression	gi|71043704|ref|NP_001020814.1|/2.56782e-135/rRNA 2'-O-methyltransferase fibrillarin [Rattus norvegicus]
ENSRNOG00000011384	Aimp1	-2.07241	0.846551	K15437|1|3e-144|511|rno:114632|aminoacyl tRNA synthase complex-interacting multifunctional protein 1	GO:0043231//intracellular membrane-bounded organelle;GO:0031410//cytoplasmic vesicle;GO:0043234//protein complex;GO:0044421//extracellular region part	GO:0005102//receptor binding;GO:0042802//identical protein binding;GO:0003723//RNA binding	GO:0001525//angiogenesis;GO:0042221//response to chemical stimulus;GO:0012501//programmed cell death;GO:0006412//translation;GO:0001935//endothelial cell proliferation;GO:0023052//signaling;GO:0007154//cell communication;GO:0002252;GO:0019318//hexose metabolic process;GO:0006952//defense response	gi|75832035|ref|NP_446209.1|/2.17e-143/aminoacyl tRNA synthase complex-interacting multifunctional protein 1 [Rattus norvegicus]
ENSRNOG00000007775	Cmpk1	-2.39345	0.840053	K13800|1|9e-129|461|rno:298410|UMP-CMP kinase [EC:2.7.4.- 2.7.4.14]	GO:0043231//intracellular membrane-bounded organelle;GO:0044444//cytoplasmic part	GO:0016776//phosphotransferase activity, phosphate group as acceptor;GO:0019201//nucleotide kinase activity;GO:0032559;GO:0019206//nucleoside kinase activity	GO:0009123;GO:0006221//pyrimidine nucleotide biosynthetic process;GO:0006796//phosphate-containing compound metabolic process	gi|71043752|ref|NP_001020826.1|/7.20711e-128/UMP-CMP kinase [Rattus norvegicus]
ENSRNOG00000017801	Atf4	3.92032	0.911374	K04374|1|5e-169|594|rno:79255|activating transcription factor 4	GO:0043231//intracellular membrane-bounded organelle;GO:0043234//protein complex;GO:0032589//neuron projection membrane	GO:0001071//nucleic acid binding transcription factor activity;GO:0003677//DNA binding;GO:0005515//protein binding	GO:0019752//carboxylic acid metabolic process;GO:0006357//regulation of transcription from RNA polymerase II promoter;GO:0007186//G-protein coupled receptor signaling pathway;GO:0033554//cellular response to stress;GO:0006006//glucose metabolic process	gi|13242322|ref|NP_077379.1|/3.85357e-168/cyclic AMP-dependent transcription factor ATF-4 [Rattus norvegicus]
ENSRNOG00000019156	Aurkaip1	-2.16576	0.848836	K08286|1|1e-76|286|hsa:54998|protein-serine/threonine kinase [EC:2.7.11.-]	GO:0031981//nuclear lumen	GO:0016772//transferase activity, transferring phosphorus-containing groups;GO:0005488//binding	GO:0006796//phosphate-containing compound metabolic process;GO:0007088//regulation of mitosis;GO:0030162//regulation of proteolysis	gi|51948444|ref|NP_001004237.1|/8.82928e-113/aurora kinase A-interacting protein [Rattus norvegicus]
ENSRNOG00000010452	Cycs	1.13538	0.802012	K08738|1|5e-57|222|rno:25309|cytochrome c	GO:0005743//mitochondrial inner membrane;GO:0044425//membrane part	GO:0009055//electron carrier activity;GO:0005506//iron ion binding	GO:0000737//DNA catabolic process, endonucleolytic;GO:0072593//reactive oxygen species metabolic process;GO:0022904//respiratory electron transport chain;GO:0051234//establishment of localization;GO:0006919//activation of cysteine-type endopeptidase activity involved in apoptotic process;GO:0006950//response to stress	gi|395857982|ref|XP_003801357.1|/6.74016e-57/PREDICTED: uncharacterized protein LOC100960229 [Otolemur garnettii]
ENSRNOG00000019601	Mapk3	1.7923	0.825824	K04371|1|0.0|711|mmu:26417|extracellular signal-regulated kinase 1/2 [EC:2.7.11.24]	GO:0031981//nuclear lumen;GO:0032991//macromolecular complex;GO:0044444//cytoplasmic part	GO:0032559;GO:0045309//protein phosphorylated amino acid binding;GO:0004702//receptor signaling protein serine/threonine kinase activity;GO:0019899//enzyme binding	GO:0001775//cell activation;GO:0009888//tissue development;GO:0009612//response to mechanical stimulus;GO:0007169//transmembrane receptor protein tyrosine kinase signaling pathway;GO:0006464//cellular protein modification process;GO:0043331//response to dsRNA;GO:0009653//anatomical structure morphogenesis;GO:0007600//sensory perception;GO:0006935//chemotaxis;GO:0006796//phosphate-containing compo…	gi|515499|gb|AAA20009.1|/0/microtubule-associated protein-2 kinase, partial [Rattus norvegicus]
ENSRNOG00000011419	Aldh6a1	-2.63599	0.866498	K00140|1|0.0|1005|rno:81708|malonate-semialdehyde dehydrogenase (acetylating) / methylmalonate-semialdehyde dehydrogenase [EC:1.2.1.18 1.2.1.27]	GO:0031981//nuclear lumen	GO:0016788//hydrolase activity, acting on ester bonds;GO:0016620//oxidoreductase activity, acting on the aldehyde or oxo group of donors, NAD or NADP as acceptor;GO:0005504//fatty acid binding	GO:0006573//valine metabolic process;GO:0009063//cellular amino acid catabolic process;GO:0006208//pyrimidine nucleobase catabolic process;GO:0045444//fat cell differentiation	gi|145651820|ref|NP_112319.2|/0/methylmalonate-semialdehyde dehydrogenase [acylating], mitochondrial precursor [Rattus norvegicus]
ENSRNOG00000003919	Rps6kb1	-1.96993	0.808373	K04688|1|0.0|1051|rno:83840|p70 ribosomal S6 kinase [EC:2.7.11.1]	GO:0030529//ribonucleoprotein complex;GO:0031966//mitochondrial membrane;GO:0044459//plasma membrane part	GO:0004674//protein serine/threonine kinase activity;GO:0032559	GO:0006915//apoptotic process;GO:0014874;GO:0007346//regulation of mitotic cell cycle;GO:0008284//positive regulation of cell proliferation;GO:0048017//inositol lipid-mediated signaling;GO:0043434//response to peptide hormone stimulus;GO:0003006//developmental process involved in reproduction;GO:0007169//transmembrane receptor protein tyrosine kinase signaling pathway;GO:0007243//intracellular pr…	gi|54041073|sp|P67999.1|KS6B1_RAT/0/RecName: Full=Ribosomal protein S6 kinase beta-1; Short=S6K-beta-1; Short=S6K1; AltName: Full=70 kDa ribosomal protein S6 kinase 1; Short=P70S6K1; Short=p70-S6K 1; AltName: Full=Ribosomal protein S6 kinase I; AltName: Full=p70 ribosomal S6 kinase alpha; Short=p70 S6 kinase alpha; Short=p70 S6K-alpha; Short=p70 S6KA
ENSRNOG00000019494	Psmb10	-2.70395	0.812807	K02733|1|1e-151|536|rno:291983|20S proteasome subunit beta 10 [EC:3.4.25.1]	GO:0043231//intracellular membrane-bounded organelle;GO:0000502//proteasome complex	GO:0004175//endopeptidase activity	GO:0043161//proteasomal ubiquitin-dependent protein catabolic process;GO:0006955//immune response;GO:0051320//S phase;GO:0007050//cell cycle arrest;GO:0016070//RNA metabolic process;GO:0051439//regulation of ubiquitin-protein ligase activity involved in mitotic cell cycle;GO:0006520//cellular amino acid metabolic process;GO:0006915//apoptotic process;GO:0030330//DNA damage response, signal transd…	gi|71043724|ref|NP_001020808.1|/1.00019e-150/proteasome subunit beta type-10 [Rattus norvegicus]
ENSRNOG00000016239	Zadh2	-2.50945	0.805003	K07119|1|0.0|706|rno:291403|	GO:0042579//microbody	GO:0046914//transition metal ion binding;GO:0003824//catalytic activity	GO:0008152//metabolic process	gi|157817316|ref|NP_001099599.1|/0/zinc-binding alcohol dehydrogenase domain-containing protein 2 [Rattus norvegicus]
ENSRNOG00000002467	Pgk1	-1.39865	0.822728	K00927|1|0.0|826|rno:24644|phosphoglycerate kinase [EC:2.7.2.3]	GO:0044444//cytoplasmic part	GO:0016301//kinase activity;GO:0032559	GO:0006796//phosphate-containing compound metabolic process;GO:0006007//glucose catabolic process	gi|40254752|ref|NP_445743.2|/0/phosphoglycerate kinase 1 [Rattus norvegicus]
ENSRNOG00000020876	Bax	-1.66652	0.807878	K02159|1|7e-100|363|rno:24887|apoptosis regulator BAX	GO:0031224//intrinsic to membrane;GO:0031966//mitochondrial membrane	GO:0051400//BH domain binding;GO:0042802//identical protein binding;GO:0046983//protein dimerization activity	GO:0010524//positive regulation of calcium ion transport into cytosol;GO:0001894//tissue homeostasis;GO:0035107//appendage morphogenesis;GO:0019740//nitrogen utilization;GO:0007006//mitochondrial membrane organization;GO:0048050//post-embryonic eye morphogenesis;GO:0002260//lymphocyte homeostasis;GO:0022603//regulation of anatomical structure morphogenesis;GO:0008406//gonad development;GO:0002339…	gi|386869283|ref|NP_058755.2|/6.00929e-100/apoptosis regulator BAX [Rattus norvegicus]
ENSRNOG00000001414	Serpine1	-2.37019	0.858936	K03982|1|0.0|786|rno:24617|plasminogen activator inhibitor-1	GO:0031091//platelet alpha granule;GO:0016020//membrane;GO:0044421//extracellular region part	GO:0004175//endopeptidase activity;GO:0004866//endopeptidase inhibitor activity;GO:0019899//enzyme binding	GO:0009629//response to gravity;GO:0010466//negative regulation of peptidase activity;GO:0001775//cell activation;GO:0016525//negative regulation of angiogenesis;GO:0006915//apoptotic process;GO:0030195//negative regulation of blood coagulation;GO:0009888//tissue development;GO:0009966//regulation of signal transduction;GO:0032102;GO:0030194//positive regulation of blood coagulation;GO:0045807//p…	gi|6981332|ref|NP_036752.1|/0/plasminogen activator inhibitor 1 precursor [Rattus norvegicus]
ENSRNOG00000021177	Cox8a	2.01549	0.853133	K02273|1|6e-27|120|rno:171335|cytochrome c oxidase subunit 8	GO:0031224//intrinsic to membrane;GO:0005746//mitochondrial respiratory chain	GO:0015002//heme-copper terminal oxidase activity	GO:0006818//hydrogen transport;GO:0006811//ion transport;GO:0008152//metabolic process	gi|148700340|gb|EDL32287.1|/3.98716e-39/mCG51330 [Mus musculus]
ENSRNOG00000011617	Dguok	2.54932	0.837293	K00904|1|1e-151|536|rno:297389|deoxyguanosine kinase [EC:2.7.1.113]	GO:0044429//mitochondrial part	GO:0032559;GO:0019136//deoxynucleoside kinase activity	GO:0046128;GO:0009215;GO:0009124//nucleoside monophosphate biosynthetic process;GO:0006796//phosphate-containing compound metabolic process;GO:0009112;GO:0010975//regulation of neuron projection development;GO:0006464//cellular protein modification process	gi|157819621|ref|NP_001100072.1|/7.54448e-151/deoxyguanosine kinase, mitochondrial [Rattus norvegicus]
ENSRNOG00000015840	Hsd17b4	-2.69598	0.861885	K12405|1|0.0|1383|rno:79244|3-hydroxyacyl-CoA dehydrogenase / 3a,7a,12a-trihydroxy-5b-cholest-24-enoyl-CoA hydratase [EC:1.1.1.35 4.2.1.107]	GO:0044439	GO:0033764//steroid dehydrogenase activity, acting on the CH-OH group of donors, NAD or NADP as acceptor;GO:0005496//steroid binding;GO:0005319//lipid transporter activity;GO:0016836//hydro-lyase activity	GO:0006869//lipid transport;GO:0016125//sterol metabolic process;GO:0006635//fatty acid beta-oxidation;GO:0006694//steroid biosynthetic process;GO:0003006//developmental process involved in reproduction	gi|162287198|ref|NP_077368.2|/0/peroxisomal multifunctional enzyme type 2 [Rattus norvegicus]
ENSRNOG00000017307	Prss23	-2.18172	0.853755	K09627|1|0.0|777|rno:308807|protease, serine, 23 [EC:3.4.21.-]	GO:0043231//intracellular membrane-bounded organelle	GO:0004175//endopeptidase activity	GO:0019538//protein metabolic process	gi|56090287|ref|NP_001007692.1|/0/serine protease 23 precursor [Rattus norvegicus]
ENSRNOG00000012026	Psmc2	-2.58222	0.863813	K03061|1|0.0|836|mmu:19181|26S proteasome regulatory subunit T1	GO:0031981//nuclear lumen;GO:0043234//protein complex	GO:0017111//nucleoside-triphosphatase activity;GO:0032559	GO:0043161//proteasomal ubiquitin-dependent protein catabolic process;GO:0051320//S phase;GO:0007050//cell cycle arrest;GO:0016070//RNA metabolic process;GO:0009207;GO:0051439//regulation of ubiquitin-protein ligase activity involved in mitotic cell cycle;GO:0006520//cellular amino acid metabolic process;GO:0006915//apoptotic process;GO:0030330//DNA damage response, signal transduction by p53 cla…	gi|33859604|ref|NP_035318.1|/0/26S protease regulatory subunit 7 [Mus musculus]
ENSRNOG00000043094	Oxct1	-2.79988	0.875145	K01027|1|0.0|996|rno:690163|3-oxoacid CoA-transferase [EC:2.8.3.5]	GO:0044429//mitochondrial part	GO:0008410//CoA-transferase activity;GO:0042802//identical protein binding	GO:0007417//central nervous system development;GO:0050796//regulation of insulin secretion;GO:0006629//lipid metabolic process;GO:0009888//tissue development;GO:0044248//cellular catabolic process;GO:0001101//response to acid;GO:0009719;GO:0031667//response to nutrient levels;GO:0001678//cellular glucose homeostasis;GO:0048513//organ development;GO:0006950//response to stress;GO:0010033//response…	gi|189181716|ref|NP_001121052.1|/0/succinyl-CoA:3-ketoacid coenzyme A transferase 1, mitochondrial precursor [Rattus norvegicus]
ENSRNOG00000014883	Git1	2.1794	0.841043	K05737|1|0.0|1398|rno:83709|G protein-coupled receptor kinase interactor 1	GO:0005924//cell-substrate adherens junction;GO:0044424//intracellular part	GO:0016772//transferase activity, transferring phosphorus-containing groups;GO:0005083//small GTPase regulator activity;GO:0008047//enzyme activator activity;GO:0004871//signal transducer activity;GO:0046914//transition metal ion binding;GO:0042802//identical protein binding;GO:0051020//GTPase binding	GO:0043087//regulation of GTPase activity;GO:0007186//G-protein coupled receptor signaling pathway;GO:0006796//phosphate-containing compound metabolic process;GO:0032012//regulation of ARF protein signal transduction	gi|13929158|ref|NP_114002.1|/0/ARF GTPase-activating protein GIT1 [Rattus norvegicus]
ENSRNOG00000003300	Btg2	2.28108	0.856314	K14443|1|2e-77|291|rno:29619|protein Tob/BTG	-	GO:0000982//RNA polymerase II core promoter proximal region sequence-specific DNA binding transcription factor activity;GO:0005488//binding	GO:0009605//response to external stimulus;GO:0006357//regulation of transcription from RNA polymerase II promoter;GO:0031442//positive regulation of mRNA 3'-end processing;GO:0007612//learning;GO:0021766//hippocampus development;GO:0008213;GO:0006259//DNA metabolic process;GO:0008285//negative regulation of cell proliferation;GO:0003002//regionalization;GO:0021953//central nervous system neuron d…	gi|8393002|ref|NP_058955.1|/1.43375e-76/protein BTG2 precursor [Rattus norvegicus]
ENSRNOG00000005130	Ogdh	2.57805	0.868352	K00164|1|0.0|2075|rno:360975|2-oxoglutarate dehydrogenase E1 component [EC:1.2.4.2]	GO:0043234//protein complex;GO:0005740//mitochondrial envelope	GO:0019842//vitamin binding;GO:0034601;GO:0016624//oxidoreductase activity, acting on the aldehyde or oxo group of donors, disulfide as acceptor;GO:0005515//protein binding	GO:0006007//glucose catabolic process;GO:0043648//dicarboxylic acid metabolic process;GO:0006553//lysine metabolic process;GO:0009060//aerobic respiration;GO:0019674//NAD metabolic process	gi|60360580|dbj|BAD90530.1|/0/mKIAA4192 protein [Mus musculus]
ENSRNOG00000021318	Epas1	-2.50133	0.831048	K09095|1|0.0|1653|rno:29452|hypoxia-inducible factor 2 alpha	GO:0043231//intracellular membrane-bounded organelle;GO:0043234//protein complex	GO:0060089;GO:0003712//transcription cofactor activity;GO:0000981//sequence-specific DNA binding RNA polymerase II transcription factor activity;GO:0046983//protein dimerization activity;GO:0003677//DNA binding;GO:0019899//enzyme binding	GO:0048771//tissue remodeling;GO:0008016//regulation of heart contraction;GO:0006357//regulation of transcription from RNA polymerase II promoter;GO:0006584//catecholamine metabolic process;GO:0045165//cell fate commitment;GO:0050953//sensory perception of light stimulus;GO:0023052//signaling;GO:0021700//developmental maturation;GO:0006996//organelle organization;GO:0030099//myeloid cell differen…	gi|149050487|gb|EDM02660.1|/0/endothelial PAS domain protein 1 [Rattus norvegicus]
ENSRNOG00000011976	Nudt7	-2.07325	0.806951	K01529|1|4e-15|82.8|mmu:66387|[EC:3.6.1.-]	GO:0042579//microbody	GO:0046914//transition metal ion binding;GO:0016817//hydrolase activity, acting on acid anhydrides;GO:0016289//CoA hydrolase activity	GO:0009117//nucleotide metabolic process;GO:0006084//acetyl-CoA metabolic process;GO:0009109;GO:0045444//fat cell differentiation	gi|149038257|gb|EDL92617.1|/7.02766e-136/nudix (nucleoside diphosphate linked moiety X)-type motif 7 (predicted), isoform CRA_d [Rattus norvegicus]
ENSRNOG00000000185	MPST	1.9484	0.82911	K01011|1|8e-176|617|rno:192172|thiosulfate/3-mercaptopyruvate sulfurtransferase [EC:2.8.1.1 2.8.1.2]	GO:0019866//organelle inner membrane;GO:0043231//intracellular membrane-bounded organelle	GO:0016783//sulfurtransferase activity	GO:0015698//inorganic anion transport;GO:0009439//cyanate metabolic process;GO:0042221//response to chemical stimulus	gi|20304123|ref|NP_620198.1|/6.0929e-175/3-mercaptopyruvate sulfurtransferase [Rattus norvegicus]
ENSRNOG00000013963	Il6st	-2.79712	0.861432	K05060|1|0.0|1736|rno:25205|interleukin 6 signal transducer	GO:0009986//cell surface;GO:0043005//neuron projection;GO:0043235//receptor complex;GO:0005887//integral to plasma membrane;GO:0044297//cell body;GO:0044421//extracellular region part	GO:0004897//ciliary neurotrophic factor receptor activity;GO:0005126//cytokine receptor binding;GO:0042802//identical protein binding;GO:0019838//growth factor binding	GO:0006641//triglyceride metabolic process;GO:0042508//tyrosine phosphorylation of Stat1 protein;GO:0045687//positive regulation of glial cell differentiation;GO:0002250//adaptive immune response;GO:0016049//cell growth;GO:0031667//response to nutrient levels;GO:0003300//cardiac muscle hypertrophy;GO:0007219//Notch signaling pathway;GO:0001819//positive regulation of cytokine production;GO:000252…	gi|149059343|gb|EDM10350.1|/0/rCG44468, isoform CRA_b [Rattus norvegicus]
ENSRNOG00000014868	Hspe1	-1.22742	0.80634	K04078|1|6e-42|171|ecb:100629260|chaperonin GroES	GO:0044429//mitochondrial part	GO:0005515//protein binding;GO:0032559	GO:0044267//cellular protein metabolic process;GO:0006915//apoptotic process;GO:0006950//response to stress	gi|291411944|ref|XP_002722245.1|/3.98751e-41/PREDICTED: heat shock 10kDa protein 1 [Oryctolagus cuniculus]
ENSRNOG00000026994	Afg3l1	-2.6974	0.823918	K08956|1|0.0|1469|rno:361436|AFG3 family protein [EC:3.4.24.-]	GO:0043231//intracellular membrane-bounded organelle;GO:0031224//intrinsic to membrane	GO:0004175//endopeptidase activity;GO:0046914//transition metal ion binding;GO:0016462//pyrophosphatase activity;GO:0032559	GO:0009057//macromolecule catabolic process;GO:0019538//protein metabolic process	gi|408772026|ref|NP_001101926.3|/0/AFG3(ATPase family gene 3)-like 1 [Rattus norvegicus]
ENSRNOG00000012536	Sgms1	-1.95069	0.824529	K04714|1|0.0|865|rno:353229|shingomyelin synthase [EC:2.7.8.27]	GO:0031228//intrinsic to Golgi membrane	GO:0016780//phosphotransferase activity, for other substituted phosphate groups	GO:0006952//defense response;GO:0006684//sphingomyelin metabolic process;GO:0006915//apoptotic process;GO:0006796//phosphate-containing compound metabolic process;GO:0040007//growth;GO:0034612//response to tumor necrosis factor;GO:0010467//gene expression;GO:0032496//response to lipopolysaccharide	gi|78214321|ref|NP_852051.2|/0/phosphatidylcholine:ceramide cholinephosphotransferase 1 [Rattus norvegicus]
ENSRNOG00000025286	Pank2	-2.83992	0.809258	K09680|1|0.0|724|rno:296167|type II pantothenate kinase [EC:2.7.1.33]	GO:0031981//nuclear lumen;GO:0005740//mitochondrial envelope	GO:0016301//kinase activity;GO:0032559	GO:0006575//cellular modified amino acid metabolic process;GO:0009108//coenzyme biosynthetic process;GO:0006796//phosphate-containing compound metabolic process;GO:0006766//vitamin metabolic process	gi|148696370|gb|EDL28317.1|/0/pantothenate kinase 2 (Hallervorden-Spatz syndrome), isoform CRA_a [Mus musculus]
ENSRNOG00000013741	Ube2d3	-1.7083	0.837546	K06689|1|2e-83|311|ssc:780418|ubiquitin-conjugating enzyme E2 D/E [EC:6.3.2.19]	GO:0043231//intracellular membrane-bounded organelle;GO:0031090//organelle membrane	GO:0019787//small conjugating protein ligase activity;GO:0032559	GO:0012501//programmed cell death;GO:0006511//ubiquitin-dependent protein catabolic process;GO:0006259//DNA metabolic process;GO:0000209//protein polyubiquitination;GO:0033554//cellular response to stress;GO:0001818//negative regulation of cytokine production;GO:0007178//transmembrane receptor protein serine/threonine kinase signaling pathway	gi|118403848|ref|NP_001072141.1|/1.2325e-82/ubiquitin-conjugating enzyme E2 D2 [Sus scrofa]
ENSRNOG00000020383	Dapk3	2.2983	0.833375	K08803|1|0.0|696|rno:64391|death-associated protein kinase [EC:2.7.11.1]	GO:0044427//chromosomal part;GO:0005634//nucleus	GO:0004674//protein serine/threonine kinase activity;GO:0030275//LRR domain binding;GO:0032559	GO:0012502//induction of programmed cell death;GO:0035556//intracellular signal transduction;GO:0006796//phosphate-containing compound metabolic process;GO:0030154//cell differentiation;GO:0006325//chromatin organization;GO:0006464//cellular protein modification process	gi|410812207|ref|NP_001177403.2|/0/death-associated protein kinase 3 isoform a [Mus musculus]
ENSRNOG00000011763	Serp1	-2.59342	0.839294	-	GO:0043231//intracellular membrane-bounded organelle;GO:0031224//intrinsic to membrane;GO:0031090//organelle membrane;GO:0030529//ribonucleoprotein complex	-	GO:0060123//regulation of growth hormone secretion;GO:0006984//ER-nucleus signaling pathway;GO:0016044//cellular membrane organization;GO:0006412//translation;GO:0050796//regulation of insulin secretion;GO:0045927//positive regulation of growth;GO:0019318//hexose metabolic process;GO:0009887//organ morphogenesis;GO:0006464//cellular protein modification process	gi|4585827|emb|CAB40910.1|/1.5238e-33/ribosome associated membrane protein RAMP4 [Rattus norvegicus]
ENSRNOG00000013493	Psma4	-2.62753	0.865508	K02728|1|8e-124|444|tgu:100190079|20S proteasome subunit alpha 3 [EC:3.4.25.1]	GO:0043231//intracellular membrane-bounded organelle;GO:0005839//proteasome core complex	GO:0004175//endopeptidase activity;GO:0005515//protein binding	GO:0043161//proteasomal ubiquitin-dependent protein catabolic process;GO:0051320//S phase;GO:0007050//cell cycle arrest;GO:0016070//RNA metabolic process;GO:0051439//regulation of ubiquitin-protein ligase activity involved in mitotic cell cycle;GO:0006520//cellular amino acid metabolic process;GO:0006915//apoptotic process;GO:0030330//DNA damage response, signal transduction by p53 class mediator…	gi|449281518|gb|EMC88575.1|/6.25179e-123/Proteasome subunit alpha type-4 [Columba livia]
ENSRNOG00000001228	Pofut2	2.16917	0.814429	K03691|1|0.0|866|rno:309686|peptide-O-fucosyltransferase [EC:2.4.1.221]	GO:0043231//intracellular membrane-bounded organelle	GO:0008417//fucosyltransferase activity	GO:0019318//hexose metabolic process	gi|164518932|ref|NP_001101091.2|/0/GDP-fucose protein O-fucosyltransferase 2 precursor [Rattus norvegicus]
ENSRNOG00000016723	Phpt1	-2.42781	0.859842	K01112|1|1e-70|265|rno:296571|[EC:3.1.3.-]	GO:0044424//intracellular part	GO:0016791//phosphatase activity	GO:0006796//phosphate-containing compound metabolic process	gi|164663846|ref|NP_001100028.2|/7.2109e-70/phosphohistidine phosphatase 1 [Rattus norvegicus]
ENSRNOG00000031167	SRXN1	-2.06361	0.844181	K12260|1|6e-52|204|rno:296271|sulfiredoxin [EC:1.8.98.2]	GO:0044444//cytoplasmic part	GO:0003676//nucleic acid binding;GO:0016667//oxidoreductase activity, acting on a sulfur group of donors;GO:0032559	GO:0008152//metabolic process;GO:0006950//response to stress	gi|33086588|gb|AAP92606.1|/2.05848e-125/Ab2-390 [Rattus norvegicus]
ENSRNOG00000009795	Nfib	1.81607	0.822306	K09169|1|0.0|911|aml:100477452|nuclear factor I/B	GO:0031981//nuclear lumen;GO:0031981//nuclear lumen;GO:0031981//nuclear lumen	GO:0001071//nucleic acid binding transcription factor activity;GO:0043566//structure-specific DNA binding;GO:0001071//nucleic acid binding transcription factor activity;GO:0043566//structure-specific DNA binding;GO:0001071//nucleic acid binding transcription factor activity;GO:0043566//structure-specific DNA binding	GO:0007606//sensory perception of chemical stimulus;GO:0030323//respiratory tube development;GO:0006259//DNA metabolic process;GO:0007420//brain development;GO:0008283//cell proliferation;GO:0007606//sensory perception of chemical stimulus;GO:0030323//respiratory tube development;GO:0006259//DNA metabolic process;GO:0007420//brain development;GO:0008283//cell proliferation;GO:0007606//sensory per…	gi|51972043|dbj|BAA25290.2|/0/NF1-B1 [Rattus norvegicus]
ENSRNOG00000013766	Acaa2	2.49911	0.866972	K07508|1|0.0|749|rno:170465|acetyl-CoA acyltransferase 2 [EC:2.3.1.16]	GO:0019866//organelle inner membrane;GO:0044429//mitochondrial part	GO:0005488//binding;GO:0016408	GO:0009062//fatty acid catabolic process;GO:0006732//coenzyme metabolic process;GO:0043066//negative regulation of apoptotic process;GO:0008203//cholesterol metabolic process	gi|149027156|gb|EDL82880.1|/0/acetyl-Coenzyme A acyltransferase 2 (mitochondrial 3-oxoacyl-Coenzyme A thiolase), isoform CRA_f [Rattus norvegicus]
ENSRNOG00000028746	Gsto1	-2.85169	0.865908	K00799|1|3e-126|451|rno:114846|glutathione S-transferase [EC:2.5.1.18]	GO:0044444//cytoplasmic part	GO:0016655//oxidoreductase activity, acting on NADH or NADPH, quinone or similar compound as acceptor;GO:0015038//glutathione disulfide oxidoreductase activity;GO:0016765//transferase activity, transferring alkyl or aryl (other than methyl) groups	GO:0019852//L-ascorbic acid metabolic process	gi|56090550|ref|NP_001007603.1|/2.6005e-125/glutathione S-transferase omega-1 [Rattus norvegicus]
ENSRNOG00000005916	Ppm1a	2.8366	0.867899	K04457|1|0.0|794|ecb:100051348|protein phosphatase 1A (formerly 2C) [EC:3.1.3.16]	GO:0043231//intracellular membrane-bounded organelle;GO:0034704//calcium channel complex;GO:0042995//cell projection	GO:0046914//transition metal ion binding;GO:0060089;GO:0005515//protein binding;GO:0004721//phosphoprotein phosphatase activity	GO:0016055//Wnt receptor signaling pathway;GO:0006796//phosphate-containing compound metabolic process;GO:0006355//regulation of transcription, DNA-dependent;GO:0007249//I-kappaB kinase/NF-kappaB cascade;GO:0006464//cellular protein modification process	gi|338719774|ref|XP_003364061.1|/0/PREDICTED: protein phosphatase 1A-like isoform 2 [Equus caballus]
ENSRNOG00000006302	Gclc	2.43402	0.84574	K11204|1|0.0|1309|rno:25283|glutamate--cysteine ligase catalytic subunit [EC:6.3.2.2]	GO:0043234//protein complex;GO:0044444//cytoplasmic part	GO:0048037//cofactor binding;GO:0016597//amino acid binding;GO:0046983//protein dimerization activity;GO:0046872//metal ion binding;GO:0032559;GO:0016881//acid-amino acid ligase activity	GO:0003018;GO:0000096//sulfur amino acid metabolic process;GO:0006767//water-soluble vitamin metabolic process;GO:0003254//regulation of membrane depolarization;GO:0009064//glutamine family amino acid metabolic process;GO:0016567//protein ubiquitination;GO:0031331;GO:0010035//response to inorganic substance;GO:0006749//glutathione metabolic process;GO:0009719;GO:0006950//response to stress;GO:004…	gi|25742748|ref|NP_036947.1|/0/glutamate--cysteine ligase catalytic subunit [Rattus norvegicus]
ENSRNOG00000001849	Mapk1	2.11865	0.837388	K04371|1|0.0|687|rno:116590|extracellular signal-regulated kinase 1/2 [EC:2.7.11.24]	GO:0005856//cytoskeleton;GO:0031981//nuclear lumen;GO:0032991//macromolecular complex;GO:0030424//axon;GO:0030425//dendrite;GO:0044444//cytoplasmic part;GO:0043025//neuronal cell body	GO:0032559;GO:0045309//protein phosphorylated amino acid binding;GO:0004702//receptor signaling protein serine/threonine kinase activity;GO:0003676//nucleic acid binding;GO:0019901//protein kinase binding	GO:0001775//cell activation;GO:0006206//pyrimidine nucleobase metabolic process;GO:0050673//epithelial cell proliferation;GO:0007169//transmembrane receptor protein tyrosine kinase signaling pathway;GO:0050851//antigen receptor-mediated signaling pathway;GO:0043331//response to dsRNA;GO:0009653//anatomical structure morphogenesis;GO:0016477//cell migration;GO:0007600//sensory perception;GO:001250…	gi|148665020|gb|EDK97436.1|/0/mitogen activated protein kinase 1, isoform CRA_b [Mus musculus]
ENSRNOG00000016552	Hmgcs1	2.92844	0.807077	K01641|1|0.0|1052|rno:29637|hydroxymethylglutaryl-CoA synthase [EC:2.3.3.10]	GO:0044444//cytoplasmic part	GO:0046912//transferase activity, transferring acyl groups, acyl groups converted into alkyl on transfer;GO:0042802//identical protein binding	GO:0009642//response to light intensity;GO:0007417//central nervous system development;GO:0010038//response to metal ion;GO:0033273//response to vitamin;GO:0032354//response to follicle-stimulating hormone stimulus;GO:0014070//response to organic cyclic compound;GO:0006720//isoprenoid metabolic process;GO:0006694//steroid biosynthetic process;GO:0070723//response to cholesterol;GO:0008406//gonad …	gi|149059420|gb|EDM10427.1|/0/rCG44679, isoform CRA_b [Rattus norvegicus]
ENSRNOG00000017012	Coq7	-2.38763	0.838494	K06134|1|2e-96|353|mmu:12850|ubiquinone biosynthesis monooxygenase Coq7 [EC:1.14.13.-]	GO:0043231//intracellular membrane-bounded organelle;GO:0019866//organelle inner membrane	GO:0046872//metal ion binding;GO:0003824//catalytic activity	GO:0006979//response to oxidative stress;GO:0043009//chordate embryonic development;GO:0043170;GO:0010259//multicellular organismal aging;GO:0001838//embryonic epithelial tube formation;GO:0006743//ubiquinone metabolic process;GO:0042773//ATP synthesis coupled electron transport;GO:0007399//nervous system development;GO:0007005//mitochondrion organization	gi|472235294|ref|NP_036917.2|/1.01053e-101/ubiquinone biosynthesis protein COQ7 homolog [Rattus norvegicus]
ENSRNOG00000015809	Pecr	-2.3125	0.807572	K07753|1|1e-150|532|rno:113956|peroxisomal trans-2-enoyl-CoA reductase [EC:1.3.1.38]	GO:0042579//microbody	GO:0016628//oxidoreductase activity, acting on the CH-CH group of donors, NAD or NADP as acceptor	GO:0006631//fatty acid metabolic process	gi|18959236|ref|NP_579833.1|/1.12774e-149/peroxisomal trans-2-enoyl-CoA reductase [Rattus norvegicus]
ENSRNOG00000004172	Pdk2	-2.72746	0.869826	K00898|1|0.0|629|rno:81530|pyruvate dehydrogenase kinase [EC:2.7.11.2]	GO:0043234//protein complex;GO:0031981//nuclear lumen;GO:0044429//mitochondrial part	GO:0004673//protein histidine kinase activity;GO:0042802//identical protein binding;GO:0046983//protein dimerization activity;GO:0032559	GO:0006468//protein phosphorylation;GO:0019318//hexose metabolic process;GO:0006086//acetyl-CoA biosynthetic process from pyruvate;GO:0007165//signal transduction	gi|8895958|gb|AAF81193.1|AF237719_1/0/PDK2.1 pyruvate dehydrogenase kinase 2 subunit variant p45 [Rattus norvegicus]
ENSRNOG00000012392	Dnajc2	2.03058	0.834007	K09522|1|0.0|1004|rno:116456|DnaJ homolog subfamily C member 2	GO:0044444//cytoplasmic part;GO:0005635//nuclear envelope	GO:0031072//heat shock protein binding;GO:0003676//nucleic acid binding;GO:0032182//small conjugating protein binding	GO:0016049//cell growth;GO:0006259//DNA metabolic process;GO:0006355//regulation of transcription, DNA-dependent;GO:0051319;GO:0006325//chromatin organization;GO:0006458//'de novo' protein folding	gi|158138509|ref|NP_446228.2|/0/dnaJ homolog subfamily C member 2 [Rattus norvegicus]
ENSRNOG00000017188	Cyp27a1	-2.49622	0.811585	K00488|1|0.0|1060|rno:301517|cytochrome P450, family 27, subfamily A (cholestanetriol 26-monooxygenase) [EC:1.14.13.15]	GO:0019866//organelle inner membrane;GO:0005740//mitochondrial envelope	GO:0016709//oxidoreductase activity, acting on paired donors, with incorporation or reduction of molecular oxygen, NADH or NADPH as one donor, and incorporation of one atom of oxygen;GO:0070643;GO:0005506//iron ion binding;GO:0008395//steroid hydroxylase activity	GO:0016125//sterol metabolic process;GO:0006694//steroid biosynthetic process;GO:0044237//cellular metabolic process	gi|149016121|gb|EDL75367.1|/0/rCG24013, isoform CRA_a [Rattus norvegicus]
ENSRNOG00000010633	Acsl1	2.11168	0.852143	K01897|1|0.0|1385|rno:25288|long-chain acyl-CoA synthetase [EC:6.2.1.3]	GO:0031966//mitochondrial membrane;GO:0031224//intrinsic to membrane;GO:0044439	GO:0015645//fatty acid ligase activity;GO:0016405//CoA-ligase activity;GO:0032559	GO:0006869//lipid transport;GO:0035336//long-chain fatty-acyl-CoA metabolic process;GO:0070542//response to fatty acid;GO:0019221//cytokine-mediated signaling pathway;GO:0006805//xenobiotic metabolic process;GO:0045860//positive regulation of protein kinase activity;GO:0006641//triglyceride metabolic process;GO:0019217//regulation of fatty acid metabolic process;GO:0031667//response to nutrient l…	gi|25742739|ref|NP_036952.1|/0/long-chain-fatty-acid--CoA ligase 1 [Rattus norvegicus]
ENSRNOG00000004978	Prkacb	2.82192	0.836988	K04345|1|0.0|694|rno:293508|protein kinase A [EC:2.7.11.11]	GO:0031981//nuclear lumen;GO:0016020//membrane;GO:0043234//protein complex;GO:0044444//cytoplasmic part;GO:0045202//synapse	GO:0051018//protein kinase A binding;GO:0004690//cyclic nucleotide-dependent protein kinase activity;GO:0046872//metal ion binding;GO:0032559;GO:0019900//kinase binding	GO:0015980//energy derivation by oxidation of organic compounds;GO:0007599//hemostasis;GO:0046824//positive regulation of nucleocytoplasmic transport;GO:0033762//response to glucagon stimulus;GO:0045786//negative regulation of cell cycle;GO:0032147//activation of protein kinase activity;GO:0010863//positive regulation of phospholipase C activity;GO:0007169//transmembrane receptor protein tyrosine…	gi|6755076|ref|NP_035230.1|/0/cAMP-dependent protein kinase catalytic subunit beta isoform 1 [Mus musculus]
ENSRNOG00000021206	Pla2g16	2.06022	0.844866	K00678|1|2e-10|66.2|xtr:394746|phosphatidylcholine-retinol O-acyltransferase [EC:2.3.1.135]	GO:0031224//intrinsic to membrane;GO:0044444//cytoplasmic part	GO:0005488//binding;GO:0004091//carboxylesterase activity	GO:0006629//lipid metabolic process;GO:0051726//regulation of cell cycle	gi|433963|emb|CAA53991.1|/1.90097e-72/p18H-rev 107 [Rattus norvegicus]
ENSRNOG00000004829	Immp1l	-2.33388	0.824128	K09647|1|7e-97|352|rno:687395|mitochondrial inner membrane protease subunit 1 [EC:3.4.21.-]	GO:0019866//organelle inner membrane;GO:0043231//intracellular membrane-bounded organelle	GO:0070011	GO:0019538//protein metabolic process	gi|149022834|gb|EDL79728.1|/4.73937e-96/rCG27139, isoform CRA_b [Rattus norvegicus]
ENSRNOG00000016794	Phyhd1	2.51624	0.810616	K00477|1|1e-08|62.0|nvi:100118569|phytanoyl-CoA hydroxylase [EC:1.14.11.18]	-	GO:0016701//oxidoreductase activity, acting on single donors with incorporation of molecular oxygen;GO:0043169//cation binding	GO:0008152//metabolic process	gi|61556897|ref|NP_001013099.1|/7.12163e-171/phytanoyl-CoA dioxygenase domain-containing protein 1 [Rattus norvegicus]
ENSRNOG00000023271	Parl	-2.86122	0.858115	K09650|1|0.0|662|rno:287979|rhomboid-like protein [EC:3.4.21.105]	GO:0019866//organelle inner membrane;GO:0043231//intracellular membrane-bounded organelle;GO:0031224//intrinsic to membrane;GO:0019866//organelle inner membrane;GO:0043231//intracellular membrane-bounded organelle;GO:0031224//intrinsic to membrane	GO:0004175//endopeptidase activity;GO:0004175//endopeptidase activity	GO:0019538//protein metabolic process;GO:0019538//protein metabolic process	gi|56971807|gb|AAH88226.1|/0/Psarl protein, partial [Rattus norvegicus]
ENSRNOG00000020115	Ilkap	2.21302	0.818568	K01090|1|5e-32|139|tad:TRIADDRAFT_28894|protein phosphatase [EC:3.1.3.16];K04457|2|7e-32|139|cin:100183363|protein phosphatase 1A (formerly 2C) [EC:3.1.3.16];K14803|5|5e-30|132|ame:551020|protein phosphatase 2C homolog 2/3 [EC:3.1.3.16]	GO:0043234//protein complex;GO:0044424//intracellular part	GO:0043169//cation binding;GO:0004721//phosphoprotein phosphatase activity	GO:0000084//S phase of mitotic cell cycle;GO:0006464//cellular protein modification process;GO:0051726//regulation of cell cycle;GO:0006796//phosphate-containing compound metabolic process	gi|38541341|gb|AAH62010.1|/0/Integrin-linked kinase-associated serine/threonine phosphatase 2C [Rattus norvegicus]
ENSRNOG00000009745	PPP3CC	-2.65096	0.83961	K04348|1|0.0|837|rno:171378|protein phosphatase 3, catalytic subunit [EC:3.1.3.16]	GO:0044444//cytoplasmic part	GO:0043169//cation binding;GO:0016791//phosphatase activity;GO:0005515//protein binding	GO:0007417//central nervous system development;GO:0006915//apoptotic process;GO:0006796//phosphate-containing compound metabolic process	gi|300119940|gb|ADJ67995.1|/0/protein phosphatase 3 catalytic subunit gamma transcript variant 1 [Rattus norvegicus]
ENSRNOG00000028188	GSTT2	-2.26563	0.839094	K00799|1|7e-135|481|rno:29487|glutathione S-transferase [EC:2.5.1.18]	GO:0043231//intracellular membrane-bounded organelle;GO:0044444//cytoplasmic part	GO:0016765//transferase activity, transferring alkyl or aryl (other than methyl) groups	GO:0006790//sulfur compound metabolic process	gi|6980992|ref|NP_036928.1|/5.49966e-134/glutathione S-transferase theta-2 [Rattus norvegicus]
ENSRNOG00000024411	Cbr4	-2.4539	0.805403	K11539|1|1e-113|409|rno:359725|carbonyl reductase 4 [EC:1.1.1.-]	GO:0044429//mitochondrial part	GO:0050661//NADP binding;GO:0003959//NADPH dehydrogenase activity	GO:0051260//protein homooligomerization;GO:0006631//fatty acid metabolic process	gi|32996723|ref|NP_872613.1|/7.86863e-113/carbonyl reductase family member 4 [Rattus norvegicus]
ENSRNOG00000006975	Wasl	-2.72557	0.813428	K05747|1|9e-146|519|rno:682507|Wiskott-Aldrich syndrome protein	GO:0005856//cytoskeleton;GO:0031981//nuclear lumen;GO:0031252//cell leading edge;GO:0012505//endomembrane system	GO:0008092//cytoskeletal protein binding;GO:0030695//GTPase regulator activity	GO:0051707//response to other organism;GO:0007015//actin filament organization;GO:0030030//cell projection organization;GO:0019222//regulation of metabolic process;GO:0006351//transcription, DNA-dependent;GO:0065003	gi|402864668|ref|XP_003896577.1|/1.24252e-150/PREDICTED: neural Wiskott-Aldrich syndrome protein [Papio anubis]
ENSRNOG00000016272	Edf1	-2.36534	0.860558	K03627|1|2e-80|298|cfa:480674|putative transcription factor	GO:0005667//transcription factor complex	GO:0003712//transcription cofactor activity;GO:0016741;GO:0004468//lysine N-acetyltransferase activity;GO:0001071//nucleic acid binding transcription factor activity;GO:0003677//DNA binding;GO:0005515//protein binding	GO:0006629//lipid metabolic process;GO:0051099//positive regulation of binding;GO:0032501//multicellular organismal process;GO:0030855//epithelial cell differentiation;GO:0006351//transcription, DNA-dependent	gi|10946942|ref|NP_067494.1|/7.35462e-78/endothelial differentiation-related factor 1 [Mus musculus]
ENSRNOG00000017777	Ahcy	2.38831	0.835798	K01251|1|0.0|862|rno:29443|adenosylhomocysteinase [EC:3.3.1.1]	GO:0048770	GO:0016802;GO:0046914//transition metal ion binding;GO:0017076//purine nucleotide binding;GO:0005515//protein binding	GO:0042219//cellular modified amino acid catabolic process;GO:0002437//inflammatory response to antigenic stimulus;GO:0031667//response to nutrient levels;GO:0006730//one-carbon metabolic process;GO:0048512//circadian behavior	gi|8392878|ref|NP_058897.1|/0/adenosylhomocysteinase [Rattus norvegicus]
ENSRNOG00000014813	Prkag1	2.5858	0.845613	K07200|1|4e-177|621|rno:25520|5'-AMP-activated protein kinase, regulatory gamma subunit	GO:0031981//nuclear lumen;GO:0043234//protein complex;GO:0044444//cytoplasmic part	GO:0004690//cyclic nucleotide-dependent protein kinase activity;GO:0032559;GO:0019887//protein kinase regulator activity;GO:0019900//kinase binding	GO:0033674//positive regulation of kinase activity;GO:0007169//transmembrane receptor protein tyrosine kinase signaling pathway;GO:0051259//protein oligomerization;GO:0006096//glycolysis;GO:0022402//cell cycle process;GO:0048232//male gamete generation;GO:0006464//cellular protein modification process;GO:0019217//regulation of fatty acid metabolic process	gi|1335860|gb|AAC52580.1|/3.44573e-176/5'-AMP-activated protein kinase, gamma-1 subunit, partial [Rattus norvegicus]
ENSRNOG00000020979	Psmb4	2.08924	0.850269	K02736|1|1e-147|522|mmu:19172|20S proteasome subunit beta 7 [EC:3.4.25.1]	GO:0005815//microtubule organizing center;GO:0043231//intracellular membrane-bounded organelle;GO:0000502//proteasome complex	GO:0004175//endopeptidase activity;GO:0005488//binding	GO:0043161//proteasomal ubiquitin-dependent protein catabolic process;GO:0051320//S phase;GO:0002437//inflammatory response to antigenic stimulus;GO:0007050//cell cycle arrest;GO:0016070//RNA metabolic process;GO:0051439//regulation of ubiquitin-protein ligase activity involved in mitotic cell cycle;GO:0006520//cellular amino acid metabolic process;GO:0006915//apoptotic process;GO:0030330//DNA da…	gi|149030731|gb|EDL85768.1|/3.7724e-152/proteasome (prosome, macropain) subunit, beta type 4 [Rattus norvegicus]
ENSRNOG00000011667	Fastk	-2.32045	0.847383	K08290|1|0.0|727|rno:296741|Fas-activated serine/threonine kinase [EC:2.7.11.8]	GO:0043231//intracellular membrane-bounded organelle	GO:0004674//protein serine/threonine kinase activity;GO:0032559	GO:0010468//regulation of gene expression;GO:0006464//cellular protein modification process;GO:0012501//programmed cell death;GO:0006796//phosphate-containing compound metabolic process	gi|58865504|ref|NP_001011967.1|/0/fas-activated serine/threonine kinase [Rattus norvegicus]
ENSRNOG00000010539	Mcat	2.38811	0.807435	K00645|1|0.0|748|rno:315173|[acyl-carrier-protein] S-malonyltransferase [EC:2.3.1.39]	GO:0043231//intracellular membrane-bounded organelle	GO:0003824//catalytic activity	GO:0006631//fatty acid metabolic process	gi|300796456|ref|NP_001178717.1|/0/malonyl-CoA-acyl carrier protein transacylase, mitochondrial [Rattus norvegicus]
ENSRNOG00000019466	Agpat2	2.83119	0.828826	K13509|1|6e-143|508|rno:311821|lysophosphatidate acyltransferase [EC:2.3.1.51]	GO:0031224//intrinsic to membrane;GO:0043231//intracellular membrane-bounded organelle;GO:0031090//organelle membrane	GO:0016411//acylglycerol O-acyltransferase activity	GO:0006644//phospholipid metabolic process;GO:0006641//triglyceride metabolic process;GO:0046394;GO:0001959//regulation of cytokine-mediated signaling pathway;GO:0001816//cytokine production	gi|157822109|ref|NP_001101291.1|/4.52924e-142/1-acyl-sn-glycerol-3-phosphate acyltransferase beta precursor [Rattus norvegicus]
ENSRNOG00000020543	NOSIP	-2.01589	0.82317	K13125|1|5e-173|607|rno:292894|nitric oxide synthase-interacting protein	GO:0044444//cytoplasmic part;GO:0043231//intracellular membrane-bounded organelle	GO:0005488//binding	GO:0006807//nitrogen compound metabolic process;GO:0032769//negative regulation of monooxygenase activity	gi|157820159|ref|NP_001099730.1|/4.11283e-172/nitric oxide synthase-interacting protein [Rattus norvegicus]
ENSRNOG00000000186	Tst	1.64005	0.82059	K01011|1|3e-175|615|rno:25274|thiosulfate/3-mercaptopyruvate sulfurtransferase [EC:2.8.1.1 2.8.1.2]	GO:0019866//organelle inner membrane;GO:0044429//mitochondrial part	GO:0016783//sulfurtransferase activity	GO:0015698//inorganic anion transport;GO:0031163;GO:0009439//cyanate metabolic process	gi|57528682|ref|NP_036940.1|/2.10619e-174/thiosulfate sulfurtransferase [Rattus norvegicus]
ENSRNOG00000000459	Psmb9	2.50424	0.818104	K02741|1|2e-79|295|rno:24967|20S proteasome subunit beta 9 [EC:3.4.25.1]	GO:0044424//intracellular part;GO:0043234//protein complex	GO:0008233//peptidase activity	GO:0043161//proteasomal ubiquitin-dependent protein catabolic process;GO:0051320//S phase;GO:0007050//cell cycle arrest;GO:0016070//RNA metabolic process;GO:0051439//regulation of ubiquitin-protein ligase activity involved in mitotic cell cycle;GO:0006520//cellular amino acid metabolic process;GO:0006915//apoptotic process;GO:0002376//immune system process;GO:0030330//DNA damage response, signal …	gi|258614009|ref|NP_036840.2|/1.9441e-78/proteasome subunit beta type-9 [Rattus norvegicus]
ENSRNOG00000019974	Uba52	-3.43591	0.895766	K02927|1|6e-73|272|ptr:735674|large subunit ribosomal protein L40e	GO:0030529//ribonucleoprotein complex;GO:0030139//endocytic vesicle;GO:0031090//organelle membrane;GO:0031981//nuclear lumen	GO:0005198//structural molecule activity;GO:0005488//binding	GO:0031016//pancreas development;GO:0051091//positive regulation of sequence-specific DNA binding transcription factor activity;GO:0050851//antigen receptor-mediated signaling pathway;GO:0006259//DNA metabolic process;GO:0051320//S phase;GO:0030330//DNA damage response, signal transduction by p53 class mediator;GO:0043066//negative regulation of apoptotic process;GO:0007173//epidermal growth fact…	gi|13569612|gb|AAK31162.1|/8.69746e-74/ubiquitin A-52 residue ribosomal protein fusion product 1 [Homo sapiens]
ENSRNOG00000046253	-	2.48815	0.85347	K08818|1|2e-56|219|mmu:12537|cell division cycle 2-like [EC:2.7.11.22]	GO:0044424//intracellular part	GO:0005488//binding;GO:0004672//protein kinase activity	GO:0050789//regulation of biological process;GO:0044238//primary metabolic process;GO:0044260;GO:0007067//mitosis	gi|386781773|ref|NP_665709.2|/2.45439e-56/cyclin-dependent kinase 11B [Rattus norvegicus]
ENSRNOG00000002389	Morf4l2	2.33707	0.852891	K11342|1|6e-164|578|rno:317413|mortality factor 4-like protein 2	GO:0031981//nuclear lumen	GO:0005488//binding	GO:0016049//cell growth;GO:0006357//regulation of transcription from RNA polymerase II promoter;GO:0051149//positive regulation of muscle cell differentiation;GO:0006259//DNA metabolic process;GO:0033554//cellular response to stress;GO:0006325//chromatin organization	gi|56090315|ref|NP_001007715.1|/5.16093e-163/mortality factor 4-like protein 2 [Rattus norvegicus]
ENSRNOG00000003385	GLRX2	-2.2134	0.80238	K03676|1|3e-63|243|rno:114022|glutaredoxin 3	GO:0031981//nuclear lumen;GO:0031981//nuclear lumen	GO:0043169//cation binding;GO:0051536//iron-sulfur cluster binding;GO:0015037//peptide disulfide oxidoreductase activity;GO:0030611//arsenate reductase activity;GO:0043169//cation binding;GO:0051536//iron-sulfur cluster binding;GO:0015037//peptide disulfide oxidoreductase activity;GO:0030611//arsenate reductase activity	GO:0012501//programmed cell death;GO:0048869//cellular developmental process;GO:0006259//DNA metabolic process;GO:0000302//response to reactive oxygen species;GO:0006457//protein folding;GO:0009628//response to abiotic stimulus;GO:0006790//sulfur compound metabolic process;GO:0006091//generation of precursor metabolites and energy;GO:0019725//cellular homeostasis;GO:0051234//establishment of loca…	gi|61556751|ref|NP_001013052.1|/2.84461e-66/glutaredoxin-2, mitochondrial [Rattus norvegicus]
ENSRNOG00000015866	Hint2	-2.46625	0.858757	K02089|1|8e-43|173|ame:408406|cyclin-dependent kinase 4 [EC:2.7.11.22];K10863|2|1e-06|53.5|acs:100558032|aprataxin [EC:3.-.-.-]	GO:0043231//intracellular membrane-bounded organelle	GO:0003824//catalytic activity	GO:0012501//programmed cell death;GO:0008202//steroid metabolic process	gi|164565401|ref|NP_001101425.2|/3.63015e-87/histidine triad nucleotide binding protein 2 [Rattus norvegicus]
ENSRNOG00000047656	Gaa	2.3237	0.849889	K12316|1|0.0|1898|rno:367562|lysosomal alpha-glucosidase [EC:3.2.1.20]	GO:0005764//lysosome	GO:0030246//carbohydrate binding;GO:0004558//alpha-glucosidase activity	GO:0003011//involuntary skeletal muscle contraction;GO:0008016//regulation of heart contraction;GO:0005984//disaccharide metabolic process;GO:0007033//vacuole organization;GO:0051651//maintenance of location in cell;GO:0005977//glycogen metabolic process;GO:0007610//behavior;GO:0055008//cardiac muscle tissue morphogenesis;GO:0019725//cellular homeostasis;GO:0019318//hexose metabolic process;GO:00…	gi|149054964|gb|EDM06781.1|/0/glucosidase, alpha, acid, isoform CRA_a [Rattus norvegicus]
ENSRNOG00000007120	Mtmr3	-2.89581	0.819305	K01104|1|0.0|2332|rno:305482|protein-tyrosine phosphatase [EC:3.1.3.48]	GO:0031981//nuclear lumen	GO:0046914//transition metal ion binding;GO:0004721//phosphoprotein phosphatase activity	GO:0006464//cellular protein modification process;GO:0006796//phosphate-containing compound metabolic process	gi|149047559|gb|EDM00229.1|/0/rCG35926, isoform CRA_a [Rattus norvegicus]
ENSRNOG00000018129	Ndufab1	-2.32025	0.863318	K03955|1|1e-70|266|rno:293453|NADH dehydrogenase (ubiquinone) 1 alpha/beta subcomplex 1 [EC:1.6.5.3 1.6.99.3]	GO:0005746//mitochondrial respiratory chain	GO:0019842//vitamin binding;GO:0022892;GO:0046872//metal ion binding;GO:0008289//lipid binding;GO:0050136//NADH dehydrogenase (quinone) activity	GO:0006631//fatty acid metabolic process;GO:0022904//respiratory electron transport chain;GO:0051234//establishment of localization	gi|157820787|ref|NP_001099764.1|/6.99939e-70/acyl carrier protein, mitochondrial [Rattus norvegicus]
ENSRNOG00000014490	Bdh2	2.52097	0.804508	K00019|1|5e-141|501|rno:295458|3-hydroxybutyrate dehydrogenase [EC:1.1.1.30]	GO:0043231//intracellular membrane-bounded organelle	GO:0016627//oxidoreductase activity, acting on the CH-CH group of donors;GO:0016616//oxidoreductase activity, acting on the CH-OH group of donors, NAD or NADP as acceptor;GO:0000166//nucleotide binding	GO:0006778//porphyrin-containing compound metabolic process;GO:0055080//cation homeostasis;GO:0009237//siderophore metabolic process;GO:0009062//fatty acid catabolic process	gi|157816997|ref|NP_001099943.1|/4.39742e-140/3-hydroxybutyrate dehydrogenase type 2 [Rattus norvegicus]
ENSRNOG00000010208	Timp1	2.10131	0.830016	-	GO:0031091//platelet alpha granule;GO:0005578//proteinaceous extracellular matrix	GO:0043169//cation binding;GO:0004866//endopeptidase inhibitor activity	GO:0048469//cell maturation;GO:0009888//tissue development;GO:0009611//response to wounding;GO:0007599//hemostasis;GO:0008202//steroid metabolic process;GO:0008283//cell proliferation;GO:0006887//exocytosis;GO:0031330;GO:0006915//apoptotic process;GO:0001775//cell activation;GO:0009725//response to hormone stimulus;GO:0010466//negative regulation of peptidase activity	gi|16758666|ref|NP_446271.1|/1.07067e-110/metalloproteinase inhibitor 1 precursor [Rattus norvegicus]
ENSRNOG00000015020	Idh1	1.51468	0.823844	K00031|1|0.0|800|rno:24479|isocitrate dehydrogenase [EC:1.1.1.42]	GO:0043231//intracellular membrane-bounded organelle;GO:0044444//cytoplasmic part	GO:0046872//metal ion binding;GO:0042802//identical protein binding;GO:0004448//isocitrate dehydrogenase activity;GO:0000166//nucleotide binding	GO:0006629//lipid metabolic process;GO:0009725//response to hormone stimulus;GO:0043648//dicarboxylic acid metabolic process;GO:0006790//sulfur compound metabolic process;GO:0044262//cellular carbohydrate metabolic process;GO:0009060//aerobic respiration;GO:0008406//gonad development;GO:0006950//response to stress	gi|13928690|ref|NP_113698.1|/0/isocitrate dehydrogenase [NADP] cytoplasmic [Rattus norvegicus]
ENSRNOG00000018898	Mpi	-2.29421	0.811606	K01809|1|0.0|850|rno:300741|mannose-6-phosphate isomerase [EC:5.3.1.8]	GO:0044444//cytoplasmic part	GO:0046914//transition metal ion binding;GO:0016861//intramolecular oxidoreductase activity, interconverting aldoses and ketoses	GO:0009226//nucleotide-sugar biosynthetic process;GO:0006487//protein N-linked glycosylation;GO:0019318//hexose metabolic process	gi|51854221|ref|NP_001004081.1|/0/mannose-6-phosphate isomerase [Rattus norvegicus]
ENSRNOG00000017583	Mapkap1	-2.83777	0.811975	-	GO:0043231//intracellular membrane-bounded organelle;GO:0016020//membrane;GO:0031410//cytoplasmic vesicle	GO:0031267//small GTPase binding	GO:0048017//inositol lipid-mediated signaling;GO:0031294;GO:0006796//phosphate-containing compound metabolic process;GO:0007169//transmembrane receptor protein tyrosine kinase signaling pathway	gi|58865506|ref|NP_001011964.1|/0/target of rapamycin complex 2 subunit MAPKAP1 [Rattus norvegicus]
ENSRNOG00000016511	Pitrm1	-2.78791	0.855166	K06972|1|0.0|1952|rno:307081|	GO:0044429//mitochondrial part	GO:0004175//endopeptidase activity;GO:0046914//transition metal ion binding;GO:0030234//enzyme regulator activity	GO:0019538//protein metabolic process	gi|157819139|ref|NP_001100833.1|/0/presequence protease, mitochondrial [Rattus norvegicus]
ENSRNOG00000003223	Degs1	-2.11511	0.841285	K04712|1|0.0|689|rno:58970|sphingolipid delta-4 desaturase [EC:1.14.-.-]	GO:0031090//organelle membrane;GO:0043231//intracellular membrane-bounded organelle;GO:0016021//integral to membrane	GO:0005488//binding;GO:0016705//oxidoreductase activity, acting on paired donors, with incorporation or reduction of molecular oxygen	GO:0006633//fatty acid biosynthetic process;GO:0006643//membrane lipid metabolic process	gi|162287184|ref|NP_445775.2|/0/sphingolipid delta(4)-desaturase DES1 [Rattus norvegicus]
ENSRNOG00000000437	Agpat1	2.62382	0.846172	K13509|1|6e-155|548|rno:406165|lysophosphatidate acyltransferase [EC:2.3.1.51]	GO:0043231//intracellular membrane-bounded organelle;GO:0031224//intrinsic to membrane	GO:0016411//acylglycerol O-acyltransferase activity	GO:0006644//phospholipid metabolic process;GO:0006641//triglyceride metabolic process;GO:0046394;GO:0001816//cytokine production	gi|149027956|gb|EDL83407.1|/1.24673e-155/1-acylglycerol-3-phosphate O-acyltransferase 1, isoform CRA_b [Rattus norvegicus]
ENSRNOG00000011728	Fto	2.5289	0.821411	-	GO:0043231//intracellular membrane-bounded organelle	GO:0016706//oxidoreductase activity, acting on paired donors, with incorporation or reduction of molecular oxygen, 2-oxoglutarate as one donor, and incorporation of one atom each of oxygen into both donors;GO:0016701//oxidoreductase activity, acting on single donors with incorporation of molecular oxygen;GO:0005506//iron ion binding	GO:0009888//tissue development;GO:0035513;GO:0006281//DNA repair;GO:0043576//regulation of respiratory gaseous exchange;GO:0035511//oxidative DNA demethylation;GO:0035264//multicellular organism growth;GO:0070344;GO:0019915//lipid storage;GO:0048871//multicellular organismal homeostasis	gi|89337260|ref|NP_001034802.1|/0/alpha-ketoglutarate-dependent dioxygenase FTO [Rattus norvegicus]
ENSRNOG00000005332	Csdc2	-2.43339	0.823949	-	GO:0043231//intracellular membrane-bounded organelle	GO:0003676//nucleic acid binding	GO:0006351//transcription, DNA-dependent;GO:0008334//histone mRNA metabolic process;GO:0006396//RNA processing	gi|6114756|emb|CAA62001.2|/8.43105e-114/PIPPin protein [Rattus norvegicus]
ENSRNOG00000003782	Acot9	-2.67271	0.852396	K12417|1|1e-07|58.9|xtr:100490522|acyl-CoA thioesteraes 11 [EC:3.1.2.-]	GO:0043231//intracellular membrane-bounded organelle	GO:0005488//binding	GO:0006732//coenzyme metabolic process	gi|62078649|ref|NP_001013982.1|/0/acyl-coenzyme A thioesterase 9, mitochondrial [Rattus norvegicus]
ENSRNOG00000003537	Spta1	-2.06551	0.83366	K06114|1|0.0|4491|rno:289257|spectrin alpha	GO:0030864//cortical actin cytoskeleton;GO:0009898//internal side of plasma membrane;GO:0030864//cortical actin cytoskeleton;GO:0009898//internal side of plasma membrane	GO:0005198//structural molecule activity;GO:0003779//actin binding;GO:0046872//metal ion binding;GO:0005198//structural molecule activity;GO:0003779//actin binding;GO:0046872//metal ion binding	GO:0030835//negative regulation of actin filament depolymerization;GO:0048534;GO:0006778//porphyrin-containing compound metabolic process;GO:0006935//chemotaxis;GO:0030835//negative regulation of actin filament depolymerization;GO:0048534;GO:0006778//porphyrin-containing compound metabolic process;GO:0006935//chemotaxis	gi|33303718|gb|AAQ02378.1|/0/erythroid spectrin alpha [Rattus norvegicus]
ENSRNOG00000020642	Flad1	-2.19347	0.833955	K00953|1|0.0|996|rno:751787|FAD synthetase [EC:2.7.7.2]	GO:0044444//cytoplasmic part	GO:0070566//adenylyltransferase activity;GO:0032559	GO:0006766//vitamin metabolic process;GO:0009108//coenzyme biosynthetic process;GO:0046443//FAD metabolic process	gi|148683252|gb|EDL15199.1|/0/RFad1, flavin adenine dinucleotide synthetase, homolog (yeast), isoform CRA_b [Mus musculus]
ENSRNOG00000003424	Elac2	-2.69164	0.839326	K00784|1|0.0|1618|rno:282826|ribonuclease Z [EC:3.1.26.11]	GO:0043231//intracellular membrane-bounded organelle	GO:0043169//cation binding;GO:0004518//nuclease activity	GO:0006399//tRNA metabolic process	gi|149052937|gb|EDM04754.1|/0/elaC homolog 2 (E. coli) [Rattus norvegicus]
ENSRNOG00000002778	Aatf	2.15612	0.829458	K14782|1|0.0|696|rno:114512|protein AATF/BFR2	GO:0031981//nuclear lumen;GO:0005815//microtubule organizing center;GO:0005924//cell-substrate adherens junction	GO:0030275//LRR domain binding;GO:0001071//nucleic acid binding transcription factor activity;GO:0008092//cytoskeletal protein binding	GO:0000278//mitotic cell cycle;GO:0006357//regulation of transcription from RNA polymerase II promoter;GO:0022613//ribonucleoprotein complex biogenesis;GO:0007169//transmembrane receptor protein tyrosine kinase signaling pathway;GO:0010561;GO:0006917//induction of apoptosis;GO:0009790//embryo development;GO:2000378//negative regulation of reactive oxygen species metabolic process;GO:0033554//cell…	gi|16758536|ref|NP_446172.1|/0/protein AATF [Rattus norvegicus]
ENSRNOG00000011146	Gyg1	-2.86425	0.873196	K00750|1|0.0|652|rno:81675|glycogenin glucosyltransferase [EC:2.4.1.186]	GO:0044444//cytoplasmic part	GO:0048029//monosaccharide binding;GO:0043169//cation binding;GO:0035251//UDP-glucosyltransferase activity	GO:0005977//glycogen metabolic process;GO:0019318//hexose metabolic process	gi|13591969|ref|NP_112305.1|/0/glycogenin-1 [Rattus norvegicus]
ENSRNOG00000015145	Ppp6c	-2.09495	0.831532	K15498|1|0.0|646|dre:393980|serine/threonine-protein phosphatase 6 catalytic subunit [EC:3.1.3.16]	GO:0044444//cytoplasmic part	GO:0043169//cation binding;GO:0004721//phosphoprotein phosphatase activity	GO:0006464//cellular protein modification process;GO:0006796//phosphate-containing compound metabolic process;GO:0022402//cell cycle process	gi|21312758|ref|NP_077171.1|/0/serine/threonine-protein phosphatase 6 catalytic subunit [Mus musculus]
ENSRNOG00000025704	Yod1	-2.61696	0.802222	K13719|1|0.0|647|mmu:226418|ubiquitin thioesterase OTU1 [EC:3.1.2.-]	GO:0044464//cell part	GO:0046914//transition metal ion binding;GO:0019783//small conjugating protein-specific protease activity	GO:0043161//proteasomal ubiquitin-dependent protein catabolic process;GO:0019752//carboxylic acid metabolic process;GO:0016579//protein deubiquitination;GO:0006950//response to stress;GO:0006984//ER-nucleus signaling pathway	gi|123780073|sp|Q32Q05.1|OTU1_RAT/0/RecName: Full=Ubiquitin thioesterase OTU1
ENSRNOG00000002159	Agpat9	-2.46247	0.839716	K13506|1|0.0|891|rno:305166|glycerol-3-phosphate O-acyltransferase 3/4 [EC:2.3.1.15]	GO:0031090//organelle membrane;GO:0043231//intracellular membrane-bounded organelle;GO:0031224//intrinsic to membrane	GO:0008374//O-acyltransferase activity	GO:0006644//phospholipid metabolic process;GO:0006641//triglyceride metabolic process;GO:0009966//regulation of signal transduction	gi|71043846|ref|NP_001020841.1|/0/glycerol-3-phosphate acyltransferase 3 [Rattus norvegicus]
ENSRNOG00000021068	Pip5k1a	-2.55492	0.820748	K00889|1|0.0|1036|rno:365865|1-phosphatidylinositol-4-phosphate 5-kinase [EC:2.7.1.68]	GO:0001726//ruffle;GO:0016604//nuclear body;GO:0005849//mRNA cleavage factor complex;GO:0044431//Golgi apparatus part;GO:0016020//membrane	GO:0016307//phosphatidylinositol phosphate kinase activity;GO:0019899//enzyme binding;GO:0032559	GO:0046488//phosphatidylinositol metabolic process;GO:0006796//phosphate-containing compound metabolic process;GO:0001667//ameboidal cell migration;GO:0023052//signaling	gi|110835721|ref|NP_001036086.1|/0/phosphatidylinositol-4-phosphate 5-kinase type-1 alpha [Rattus norvegicus]
ENSRNOG00000005487	Chpt1	2.45936	0.857588	K00994|1|0.0|733|rno:362866|diacylglycerol cholinephosphotransferase [EC:2.7.8.2]	GO:0031224//intrinsic to membrane;GO:0043231//intracellular membrane-bounded organelle;GO:0012505//endomembrane system	GO:0043169//cation binding;GO:0017169//CDP-alcohol phosphatidyltransferase activity;GO:0008289//lipid binding	GO:0016049//cell growth;GO:0006656//phosphatidylcholine biosynthetic process;GO:0046469//platelet activating factor metabolic process	gi|56090323|ref|NP_001007751.1|/0/cholinephosphotransferase 1 [Rattus norvegicus]
ENSRNOG00000012443	Cpt2	-2.79588	0.866445	K08766|1|0.0|1332|rno:25413|carnitine O-palmitoyltransferase 2 [EC:2.3.1.21]	GO:0043231//intracellular membrane-bounded organelle;GO:0019866//organelle inner membrane	GO:0016406	GO:0015908//fatty acid transport;GO:0009062//fatty acid catabolic process;GO:0003333//amino acid transmembrane transport;GO:0019217//regulation of fatty acid metabolic process	gi|149035736|gb|EDL90417.1|/0/carnitine palmitoyltransferase 2 [Rattus norvegicus]
ENSRNOG00000010252	Hexa	-2.5604	0.842601	K12373|1|0.0|1060|rno:300757|hexosaminidase [EC:3.2.1.52]	GO:0000323//lytic vacuole	GO:0015929//hexosaminidase activity;GO:0046983//protein dimerization activity;GO:0043167//ion binding	GO:0008366//axon ensheathment;GO:0006022;GO:0050905//neuromuscular process;GO:0008344//adult locomotory behavior;GO:0050954//sensory perception of mechanical stimulus;GO:0000003//reproduction;GO:0001573//ganglioside metabolic process;GO:0010876;GO:0007033//vacuole organization;GO:0000904//cell morphogenesis involved in differentiation	gi|52138739|ref|NP_001004443.1|/0/beta-hexosaminidase subunit alpha precursor [Rattus norvegicus]
ENSRNOG00000004693	Pbx1	2.30274	0.810427	K09355|1|0.0|738|ecb:100058426|pre-B-cell leukemia transcription factor 1	GO:0031981//nuclear lumen;GO:0043234//protein complex;GO:0031981//nuclear lumen;GO:0043234//protein complex	GO:0001071//nucleic acid binding transcription factor activity;GO:0046983//protein dimerization activity;GO:0003677//DNA binding;GO:0001071//nucleic acid binding transcription factor activity;GO:0046983//protein dimerization activity;GO:0003677//DNA binding	GO:0001501//skeletal system development;GO:0030097//hemopoiesis;GO:0045596//negative regulation of cell differentiation;GO:0008202//steroid metabolic process;GO:0006357//regulation of transcription from RNA polymerase II promoter;GO:0003006//developmental process involved in reproduction;GO:0008283//cell proliferation;GO:0035108//limb morphogenesis;GO:0001503//ossification;GO:0043392//negative re…	gi|338724769|ref|XP_003365012.1|/5.41694e-179/PREDICTED: pre-B-cell leukemia transcription factor 1 isoform 2 [Equus caballus]
ENSRNOG00000013111	Mettl3	1.91231	0.805529	K05925|1|0.0|1085|rno:361035|mRNA (2'-O-methyladenosine-N6-)-methyltransferase [EC:2.1.1.62]	GO:0016604//nuclear body	GO:0003676//nucleic acid binding;GO:0008174//mRNA methyltransferase activity	GO:0006730//one-carbon metabolic process;GO:0009451//RNA modification	gi|67078430|ref|NP_001019965.1|/0/N6-adenosine-methyltransferase 70 kDa subunit [Rattus norvegicus]
ENSRNOG00000008195	YWHAZ	2.43786	0.855724	K06630|1|3e-137|489|aml:100484483|tyrosine 3-monooxygenase/tryptophan 5-monooxygenase activation protein	GO:0032991//macromolecular complex;GO:0044430//cytoskeletal part;GO:0048770	GO:0005515//protein binding	GO:0042221//response to chemical stimulus;GO:0007599//hemostasis;GO:0006605//protein targeting;GO:0016070//RNA metabolic process;GO:0002441;GO:0001775//cell activation;GO:0043066//negative regulation of apoptotic process	gi|301756356|ref|XP_002914041.1|/2.59097e-136/PREDICTED: 14-3-3 protein zeta/delta-like [Ailuropoda melanoleuca]
ENSRNOG00000020288	Slc25a20	-2.18924	0.847709	K15109|1|4e-165|582|rno:117035|solute carrier family 25 (mitochondrial carnitine/acylcarnitine transporter), member 20/29	GO:0031224//intrinsic to membrane;GO:0043231//intracellular membrane-bounded organelle;GO:0019866//organelle inner membrane	GO:0022891//substrate-specific transmembrane transporter activity	GO:0051181//cofactor transport;GO:0003333//amino acid transmembrane transport;GO:0019217//regulation of fatty acid metabolic process	gi|52138624|ref|NP_446417.2|/3.44773e-164/mitochondrial carnitine/acylcarnitine carrier protein [Rattus norvegicus]
ENSRNOG00000005828	Skp1	1.99411	0.851006	K03094|1|2e-69|263|rno:287280|S-phase kinase-associated protein 1	GO:0031981//nuclear lumen;GO:0031461//cullin-RING ubiquitin ligase complex;GO:0044444//cytoplasmic part	GO:0016772//transferase activity, transferring phosphorus-containing groups;GO:0005488//binding;GO:0004091//carboxylesterase activity;GO:0019787//small conjugating protein ligase activity	GO:0043161//proteasomal ubiquitin-dependent protein catabolic process;GO:0051439//regulation of ubiquitin-protein ligase activity involved in mitotic cell cycle;GO:0006796//phosphate-containing compound metabolic process;GO:0051320//S phase	gi|74177667|dbj|BAE38934.1|/1.86394e-68/unnamed protein product [Mus musculus]
ENSRNOG00000012683	Abhd17c	2.36464	0.826024	K06889|1|7e-13|76.6|nve:NEMVE_v1g227226|	-	GO:0070011	GO:0019538//protein metabolic process	gi|158186616|ref|NP_598483.2|/1.82711e-157/abhydrolase domain-containing protein FAM108C1 [Mus musculus]
ENSRNOG00000016727	Akr1a1	-1.512	0.825171	K00002|1|2e-180|632|rno:78959|alcohol dehydrogenase (NADP+) [EC:1.1.1.2]	GO:0044459//plasma membrane part;GO:0044444//cytoplasmic part	GO:0005488//binding;GO:0004033//aldo-keto reductase (NADP) activity	GO:0019852//L-ascorbic acid metabolic process;GO:0006064//glucuronate catabolic process;GO:0006081//cellular aldehyde metabolic process;GO:0019318//hexose metabolic process	gi|13591894|ref|NP_112262.1|/1.26921e-179/alcohol dehydrogenase [NADP(+)] [Rattus norvegicus]
ENSRNOG00000007390	Nfkbia	-2.51764	0.857146	K04734|1|7e-172|604|rno:25493|NF-kappa-B inhibitor alpha	GO:0016020//membrane;GO:0043231//intracellular membrane-bounded organelle;GO:0043234//protein complex;GO:0044444//cytoplasmic part	GO:0019899//enzyme binding;GO:0005048//signal sequence binding;GO:0008134//transcription factor binding	GO:0031325//positive regulation of cellular metabolic process;GO:0045596//negative regulation of cell differentiation;GO:0010742//macrophage derived foam cell differentiation;GO:0042994//cytoplasmic sequestering of transcription factor;GO:0008283//cell proliferation;GO:0002224//toll-like receptor signaling pathway;GO:0043433//negative regulation of sequence-specific DNA binding transcription fact…	gi|148704779|gb|EDL36726.1|/4.43102e-176/nuclear factor of kappa light chain gene enhancer in B-cells inhibitor, alpha [Mus musculus]
ENSRNOG00000021440	Pptc7	2.23189	0.801769	-	GO:0043231//intracellular membrane-bounded organelle	GO:0016791//phosphatase activity;GO:0043169//cation binding	GO:0006796//phosphate-containing compound metabolic process	gi|157820437|ref|NP_001100611.1|/3.48245e-158/protein phosphatase PTC7 homolog [Rattus norvegicus]
ENSRNOG00000008106	Shmt2	-2.38015	0.850795	K00600|1|0.0|991|rno:299857|glycine hydroxymethyltransferase [EC:2.1.2.1]	GO:0005856//cytoskeleton;GO:0019866//organelle inner membrane;GO:0005759//mitochondrial matrix;GO:0005740//mitochondrial envelope	GO:0016742//hydroxymethyl-, formyl- and related transferase activity;GO:0031406//carboxylic acid binding;GO:0005515//protein binding;GO:0004793//threonine aldolase activity;GO:0048037//cofactor binding	GO:0051260//protein homooligomerization;GO:0006730//one-carbon metabolic process;GO:0006545//glycine biosynthetic process;GO:0006563//L-serine metabolic process;GO:0008283//cell proliferation	gi|148692564|gb|EDL24511.1|/0/serine hydroxymethyl transferase 2 (mitochondrial), isoform CRA_b [Mus musculus]
ENSRNOG00000023816	Aph1a	-2.55054	0.82416	K06172|1|3e-125|449|rno:365872|anterior pharynx defective 1	GO:0016021//integral to membrane;GO:0000139//Golgi membrane	GO:0070011;GO:0005488//binding	GO:0006917//induction of apoptosis;GO:0044267//cellular protein metabolic process;GO:0006516//glycoprotein catabolic process;GO:0007169//transmembrane receptor protein tyrosine kinase signaling pathway;GO:0051604//protein maturation;GO:0044093;GO:0001822//kidney development;GO:0033619//membrane protein proteolysis	gi|466084099|ref|XP_004285185.1|/6.44175e-133/PREDICTED: gamma-secretase subunit APH-1A isoform 1 [Orcinus orca]
ENSRNOG00000023363	Ing4	2.47895	0.836925	K11346|1|4e-135|482|rno:297597|inhibitor of growth protein 4	GO:0043231//intracellular membrane-bounded organelle;GO:0043234//protein complex	GO:0046914//transition metal ion binding;GO:0003712//transcription cofactor activity	GO:0043967//histone H4 acetylation;GO:0006355//regulation of transcription, DNA-dependent;GO:0008283//cell proliferation;GO:0006259//DNA metabolic process;GO:0040008//regulation of growth;GO:0022402//cell cycle process;GO:0006915//apoptotic process;GO:0030330//DNA damage response, signal transduction by p53 class mediator	gi|120586981|ref|NP_001073356.1|/3.25943e-134/inhibitor of growth protein 4 [Rattus norvegicus]
ENSRNOG00000017820	Nqo2	-1.94442	0.826351	K08071|1|2e-134|479|rno:291084|ribosyldihydronicotinamide dehydrogenase (quinone) [EC:1.10.99.2]	GO:0031981//nuclear lumen	GO:0043169//cation binding;GO:0016491//oxidoreductase activity;GO:0048037//cofactor binding	GO:0008152//metabolic process;GO:0007611//learning or memory	gi|51948400|ref|NP_001004214.1|/1.89016e-133/ribosyldihydronicotinamide dehydrogenase [quinone] [Rattus norvegicus]
ENSRNOG00000007757	Ppp3cb	-1.68551	0.81486	K04348|1|0.0|1020|mmu:19056|protein phosphatase 3, catalytic subunit [EC:3.1.3.16]	GO:0032991//macromolecular complex	GO:0043169//cation binding;GO:0004722//protein serine/threonine phosphatase activity;GO:0046983//protein dimerization activity	GO:0030098//lymphocyte differentiation;GO:0002260//lymphocyte homeostasis;GO:0006796//phosphate-containing compound metabolic process;GO:0019725//cellular homeostasis;GO:0010467//gene expression;GO:0014075//response to amine stimulus;GO:0001911;GO:0006464//cellular protein modification process	gi|45592930|ref|NP_032940.1|/0/serine/threonine-protein phosphatase 2B catalytic subunit beta isoform [Mus musculus]
ENSRNOG00000039551	Rdh14	-2.79276	0.815777	K11162|1|3e-156|552|rno:500629|retinol dehydrogenase 14 [EC:1.1.1.-]	GO:0043231//intracellular membrane-bounded organelle	GO:0003824//catalytic activity	GO:0008152//metabolic process	gi|157817189|ref|NP_001102746.1|/2.41209e-155/retinol dehydrogenase 14 [Rattus norvegicus]
ENSRNOG00000005061	Dlst	2.84697	0.872428	K00658|1|0.0|694|rno:299201|2-oxoglutarate dehydrogenase E2 component (dihydrolipoamide succinyltransferase) [EC:2.3.1.61]	GO:0043234//protein complex;GO:0044429//mitochondrial part;GO:0016020//membrane	GO:0016751;GO:0005515//protein binding	GO:0043648//dicarboxylic acid metabolic process;GO:0006553//lysine metabolic process;GO:0009060//aerobic respiration;GO:0019674//NAD metabolic process	gi|62512126|sp|Q01205.2|ODO2_RAT/0/RecName: Full=Dihydrolipoyllysine-residue succinyltransferase component of 2-oxoglutarate dehydrogenase complex, mitochondrial; AltName: Full=2-oxoglutarate dehydrogenase complex component E2; Short=OGDC-E2; AltName: Full=Dihydrolipoamide succinyltransferase component of 2-oxoglutarate dehydrogenase complex; AltName: Full=E2K; Flags: Precursor
ENSRNOG00000019772	Dnpep	-2.63006	0.86138	K01267|1|0.0|951|rno:301529|aspartyl aminopeptidase [EC:3.4.11.21]	GO:0043231//intracellular membrane-bounded organelle	GO:0046914//transition metal ion binding;GO:0008238//exopeptidase activity	GO:0019538//protein metabolic process	gi|67846036|ref|NP_001020050.1|/0/aspartyl aminopeptidase [Rattus norvegicus]
ENSRNOG00000008348	Cdc34	1.9601	0.845161	K02207|1|6e-120|431|rno:299602|ubiquitin-conjugating enzyme E2 R [EC:6.3.2.19]	GO:0031981//nuclear lumen	GO:0016787//hydrolase activity;GO:0032559;GO:0019787//small conjugating protein ligase activity	GO:0000209//protein polyubiquitination;GO:0010033//response to organic substance;GO:0009968//negative regulation of signal transduction;GO:0006259//DNA metabolic process;GO:0006511//ubiquitin-dependent protein catabolic process;GO:0022402//cell cycle process;GO:0043065//positive regulation of apoptotic process	gi|29243988|ref|NP_808281.1|/4.89044e-119/ubiquitin-conjugating enzyme E2 R1 [Mus musculus]
ENSRNOG00000013090	Gadd45g	1.90874	0.84792	K04402|1|5e-88|325|rno:291005|growth arrest and DNA-damage-inducible protein	GO:0043231//intracellular membrane-bounded organelle	GO:0005488//binding	GO:0012501//programmed cell death;GO:0006259//DNA metabolic process;GO:0007049//cell cycle;GO:0000165//MAPK cascade;GO:0032609//interferon-gamma production;GO:0042093//T-helper cell differentiation;GO:0033673//negative regulation of kinase activity	gi|117647202|ref|NP_001071108.1|/3.85248e-87/growth arrest and DNA damage-inducible protein GADD45 gamma [Rattus norvegicus]
ENSRNOG00000006911	Sptb	2.40016	0.803033	K06115|1|0.0|4018|rno:314251|spectrin beta	GO:0032991//macromolecular complex;GO:0030864//cortical actin cytoskeleton;GO:0009898//internal side of plasma membrane	GO:0005198//structural molecule activity;GO:0003779//actin binding	GO:0030835//negative regulation of actin filament depolymerization;GO:0006778//porphyrin-containing compound metabolic process;GO:0006935//chemotaxis	gi|47058982|ref|NP_997687.1|/0/spectrin beta chain, erythrocyte [Rattus norvegicus]
ENSRNOG00000016368	Ppp1r14c	2.25867	0.844687	K05744|1|2e-27|125|pon:100460494|LIM domain kinase 2 [EC:2.7.11.1];K12328|3|3e-17|91.7|bta:615348|protein phosphatase 1 regulatory subunit 14A	GO:0044424//intracellular part	GO:0004864//protein phosphatase inhibitor activity	GO:0019222//regulation of metabolic process;GO:0016310//phosphorylation;GO:0023052//signaling	gi|19173802|ref|NP_596916.1|/1.62151e-44/protein phosphatase 1 regulatory subunit 14C [Rattus norvegicus]
ENSRNOG00000020956	Bcat2	2.2973	0.850732	K00826|1|0.0|814|rno:64203|branched-chain amino acid aminotransferase [EC:2.6.1.42]	GO:0044429//mitochondrial part	GO:0004084//branched-chain-amino-acid transaminase activity	GO:0006549//isoleucine metabolic process;GO:0006551//leucine metabolic process;GO:0008652//cellular amino acid biosynthetic process;GO:0007589//body fluid secretion;GO:0009063//cellular amino acid catabolic process	gi|149055898|gb|EDM07329.1|/0/branched chain aminotransferase 2, mitochondrial, isoform CRA_b [Rattus norvegicus]
ENSRNOG00000029333	Echdc2	2.57647	0.848067	K05607|1|2e-77|290|xla:734576|methylglutaconyl-CoA hydratase [EC:4.2.1.18]	GO:0043231//intracellular membrane-bounded organelle	GO:0003824//catalytic activity	GO:0044238//primary metabolic process;GO:0032787//monocarboxylic acid metabolic process	gi|157821153|ref|NP_001100145.1|/2.39397e-146/enoyl-CoA hydratase domain-containing protein 2, mitochondrial [Rattus norvegicus]
ENSRNOG00000019861	Tollip	-2.18363	0.814892	K05402|1|4e-125|450|rno:361677|toll-interacting protein	GO:0043235//receptor complex;GO:0044444//cytoplasmic part	GO:0060089;GO:0005102//receptor binding;GO:0019899//enzyme binding	GO:0001775//cell activation;GO:0006952//defense response;GO:0007165//signal transduction;GO:0006796//phosphate-containing compound metabolic process;GO:0007154//cell communication	gi|157823763|ref|NP_001103138.1|/2.93245e-124/toll-interacting protein [Rattus norvegicus]
ENSRNOG00000006741	Podnl1	-3.73664	0.80891	K08764|1|2e-121|437|cfa:479564|sterol carrier protein 2 [EC:2.3.1.176]	GO:0031012//extracellular matrix	-	-	gi|392334331|ref|XP_001068151.3|/0/PREDICTED: podocan-like protein 1-like [Rattus norvegicus]
ENSRNOG00000028384	Npepl1	-2.67885	0.858178	K09611|1|0.0|903|mmu:228961|probable aminopeptidase NPEPL1 [EC:3.4.11.-]	GO:0044424//intracellular part	GO:0046914//transition metal ion binding;GO:0008237//metallopeptidase activity;GO:0008238//exopeptidase activity	GO:0019538//protein metabolic process	gi|354468753|ref|XP_003496816.1|/0/PREDICTED: probable aminopeptidase NPEPL1 [Cricetulus griseus]
ENSRNOG00000037580	Psmd8	1.55499	0.822212	K03031|1|2e-170|599|rno:292766|26S proteasome regulatory subunit N12	GO:0031981//nuclear lumen;GO:0022624//proteasome accessory complex	GO:0005488//binding	GO:0043161//proteasomal ubiquitin-dependent protein catabolic process;GO:0051320//S phase;GO:0007050//cell cycle arrest;GO:0016070//RNA metabolic process;GO:0051439//regulation of ubiquitin-protein ligase activity involved in mitotic cell cycle;GO:0006520//cellular amino acid metabolic process;GO:0006915//apoptotic process;GO:0030330//DNA damage response, signal transduction by p53 class mediator	gi|213972605|ref|NP_001094301.1|/1.32669e-169/proteasome 26S subunit, non-ATPase, 8 [Rattus norvegicus]
ENSRNOG00000048870	St6galnac4	2.6301	0.817156	K03374|1|9e-167|586|rno:407764|N-acetylgalactosaminide alpha-2,6-sialyltransferase (sialyltransferase 7D) [EC:2.4.99.7]	GO:0031228//intrinsic to Golgi membrane;GO:0031228//intrinsic to Golgi membrane	GO:0008373//sialyltransferase activity;GO:0008373//sialyltransferase activity	GO:0006643//membrane lipid metabolic process;GO:0006464//cellular protein modification process;GO:0006643//membrane lipid metabolic process;GO:0006464//cellular protein modification process	gi|293345840|ref|XP_001080040.2|/2.29704e-177/PREDICTED: alpha-N-acetyl-neuraminyl-2,3-beta-galactosyl-1,3-N-acetyl-galactosaminide alpha-2,6-sialyltransferase [Rattus norvegicus]
ENSRNOG00000000541	Glo1	-2.15584	0.851975	K01759|1|8e-106|384|rno:294320|lactoylglutathione lyase [EC:4.4.1.5]	-	GO:0043169//cation binding;GO:0016846//carbon-sulfur lyase activity	GO:0006790//sulfur compound metabolic process;GO:0043066//negative regulation of apoptotic process;GO:0006081//cellular aldehyde metabolic process;GO:0044238//primary metabolic process	gi|46485429|ref|NP_997477.1|/6.76143e-105/lactoylglutathione lyase [Rattus norvegicus]
ENSRNOG00000017481	Sucla2	-2.1348	0.855935	K01900|1|0.0|864|rno:361071|succinyl-CoA synthetase beta subunit [EC:6.2.1.4 6.2.1.5]	GO:0044429//mitochondrial part	GO:0004774//succinate-CoA ligase activity;GO:0043169//cation binding;GO:0032559	GO:0043648//dicarboxylic acid metabolic process;GO:0006104//succinyl-CoA metabolic process;GO:0009060//aerobic respiration	gi|158749584|ref|NP_001101857.2|/0/succinyl-CoA ligase [ADP-forming] subunit beta, mitochondrial [Rattus norvegicus]
ENSRNOG00000004143	Adipor1	-1.98167	0.846825	K07297|1|0.0|646|rno:289036|adiponectin receptor	GO:0031224//intrinsic to membrane;GO:0044459//plasma membrane part;GO:0044424//intracellular part	GO:0019900//kinase binding;GO:0004871//signal transducer activity;GO:0046983//protein dimerization activity	GO:0006631//fatty acid metabolic process;GO:0016049//cell growth;GO:0019221//cytokine-mediated signaling pathway;GO:0010740//positive regulation of intracellular protein kinase cascade	gi|149058570|gb|EDM09727.1|/0/adiponectin receptor 1, isoform CRA_a [Rattus norvegicus]
ENSRNOG00000011142	Cyb5b	-2.29396	0.828815	K10226|1|2e-10|68.9|tgu:100222881|fatty acid desaturase 2 (delta-6 desaturase) [EC:1.14.19.-];K10595|2|3e-10|68.6|tad:TRIADDRAFT_56425|E3 ubiquitin-protein ligase HERC2 [EC:6.3.2.19];K10224|4|3e-10|68.6|xtr:100489232|fatty acid desaturase 1 (delta-5 desaturase) [EC:1.14.19.-]	GO:0019866//organelle inner membrane;GO:0031224//intrinsic to membrane;GO:0031966//mitochondrial membrane	GO:0009055//electron carrier activity;GO:0005506//iron ion binding;GO:0030234//enzyme regulator activity	GO:0019222//regulation of metabolic process;GO:0051234//establishment of localization;GO:0006091//generation of precursor metabolites and energy	gi|13399338|ref|NP_085075.1|/2.11912e-81/cytochrome b5 type B precursor [Rattus norvegicus]
ENSRNOG00000009094	Nudt4	-2.38505	0.853228	K07766|1|1e-93|345|ptr:736394|diphosphoinositol-polyphosphate diphosphatase [EC:3.6.1.52]	GO:0044424//intracellular part	GO:0043169//cation binding;GO:0016462//pyrophosphatase activity	GO:0032239;GO:0019932//second-messenger-mediated signaling;GO:0006650//glycerophospholipid metabolic process;GO:0009123	gi|71891663|dbj|BAE16985.1|/1.29805e-92/KIAA0487 [Homo sapiens]
ENSRNOG00000023433	Gata6	2.89832	0.848299	K09183|1|0.0|753|mmu:14465|GATA-binding protein 4/5/6	GO:0031981//nuclear lumen;GO:0043234//protein complex	GO:0019900//kinase binding;GO:0043566//structure-specific DNA binding;GO:0043565//sequence-specific DNA binding;GO:0000981//sequence-specific DNA binding RNA polymerase II transcription factor activity	GO:0002065;GO:0006915//apoptotic process;GO:0060487//lung epithelial cell differentiation;GO:0042692//muscle cell differentiation;GO:0008406//gonad development;GO:0045765//regulation of angiogenesis;GO:0043009//chordate embryonic development;GO:0032870//cellular response to hormone stimulus;GO:0032906;GO:0019637//organophosphate metabolic process;GO:0042476//odontogenesis;GO:0001666//response to …	gi|215274094|sp|P46153.2|GATA6_RAT/0/RecName: Full=Transcription factor GATA-6; AltName: Full=DNA-binding protein GATA-GT2; AltName: Full=GATA-binding factor 6
ENSRNOG00000007583	Pygb	1.91647	0.841464	K00688|1|0.0|1654|rno:25739|starch phosphorylase [EC:2.4.1.1]	GO:0043005//neuron projection;GO:0044424//intracellular part	GO:0042802//identical protein binding;GO:0004645//phosphorylase activity;GO:0030246//carbohydrate binding;GO:0048037//cofactor binding	GO:0005977//glycogen metabolic process;GO:0019318//hexose metabolic process	gi|158187544|ref|NP_037320.1|/0/glycogen phosphorylase, brain form [Rattus norvegicus]
ENSRNOG00000009715	Me1	2.36448	0.854028	K00029|1|0.0|1037|rno:24552|malate dehydrogenase (oxaloacetate-decarboxylating)(NADP+) [EC:1.1.1.40]	GO:0043231//intracellular membrane-bounded organelle;GO:0044444//cytoplasmic part	GO:0046914//transition metal ion binding;GO:0004470//malic enzyme activity;GO:0032559	GO:0006629//lipid metabolic process;GO:0043648//dicarboxylic acid metabolic process;GO:0051259//protein oligomerization;GO:0006739//NADP metabolic process;GO:0009719;GO:0010033//response to organic substance	gi|205294|gb|AAA41563.1|/0/malic enzyme [Rattus norvegicus]
ENSRNOG00000017311	Me3	2.27624	0.850216	K00029|1|0.0|1196|rno:361602|malate dehydrogenase (oxaloacetate-decarboxylating)(NADP+) [EC:1.1.1.40]	GO:0044429//mitochondrial part	GO:0043169//cation binding;GO:0004470//malic enzyme activity;GO:0000166//nucleotide binding	GO:0045333//cellular respiration;GO:0032787//monocarboxylic acid metabolic process;GO:0043648//dicarboxylic acid metabolic process	gi|239049264|ref|NP_001101961.2|/0/NADP-dependent malic enzyme, mitochondrial [Rattus norvegicus]
ENSRNOG00000009399	RGD1311224	-3.66261	0.815872	K10226|1|4e-166|585|gga:423122|fatty acid desaturase 2 (delta-6 desaturase) [EC:1.14.19.-]	GO:0043231//intracellular membrane-bounded organelle;GO:0031224//intrinsic to membrane	GO:0005506//iron ion binding;GO:0016705//oxidoreductase activity, acting on paired donors, with incorporation or reduction of molecular oxygen	GO:0051234//establishment of localization;GO:0006631//fatty acid metabolic process;GO:0006091//generation of precursor metabolites and energy	gi|149022448|gb|EDL79342.1|/0/rCG26407 [Rattus norvegicus]
ENSRNOG00000000513	Mapk14	-2.08143	0.809384	K04441|1|0.0|689|cfa:403856|p38 MAP kinase [EC:2.7.11.24]	GO:0031981//nuclear lumen;GO:0005819//spindle;GO:0044444//cytoplasmic part;GO:0031981//nuclear lumen;GO:0005819//spindle;GO:0044444//cytoplasmic part	GO:0004712//protein serine/threonine/tyrosine kinase activity;GO:0032559;GO:0004702//receptor signaling protein serine/threonine kinase activity;GO:0005515//protein binding;GO:0004712//protein serine/threonine/tyrosine kinase activity;GO:0032559;GO:0004702//receptor signaling protein serine/threonine kinase activity;GO:0005515//protein binding	GO:0001775//cell activation;GO:0006357//regulation of transcription from RNA polymerase II promoter;GO:0042692//muscle cell differentiation;GO:0019318//hexose metabolic process;GO:0032989;GO:0007169//transmembrane receptor protein tyrosine kinase signaling pathway;GO:0014706//striated muscle tissue development;GO:0006974//response to DNA damage stimulus;GO:0048646//anatomical structure formation …	gi|148690637|gb|EDL22584.1|/0/mitogen activated protein kinase 14, isoform CRA_a [Mus musculus]
ENSRNOG00000037664	Tbrg4	2.22275	0.827004	K10356|1|9e-26|120|ssc:100512998|myosin I;K08290|2|2e-07|58.9|ssc:100233181|Fas-activated serine/threonine kinase [EC:2.7.11.8]	GO:0043231//intracellular membrane-bounded organelle	GO:0016301//kinase activity;GO:0032559	GO:0012501//programmed cell death;GO:0015980//energy derivation by oxidation of organic compounds;GO:0006796//phosphate-containing compound metabolic process	gi|58865880|ref|NP_001012154.1|/0/protein TBRG4 [Rattus norvegicus]
ENSRNOG00000001719	Psmd2	2.70053	0.866625	K03028|1|0.0|1633|rno:287984|26S proteasome regulatory subunit N1	GO:0022624//proteasome accessory complex	GO:0005488//binding	GO:0043161//proteasomal ubiquitin-dependent protein catabolic process;GO:0009894;GO:0051320//S phase;GO:0007050//cell cycle arrest;GO:0016070//RNA metabolic process;GO:0051439//regulation of ubiquitin-protein ligase activity involved in mitotic cell cycle;GO:0006520//cellular amino acid metabolic process;GO:0006915//apoptotic process;GO:0030330//DNA damage response, signal transduction by p53 cla…	gi|72255509|ref|NP_001026809.1|/0/26S proteasome non-ATPase regulatory subunit 2 [Rattus norvegicus]
ENSRNOG00000030654	Man2c1	2.41639	0.818873	K01191|1|0.0|1901|rno:246136|alpha-mannosidase [EC:3.2.1.24]	GO:0043231//intracellular membrane-bounded organelle	GO:0046914//transition metal ion binding;GO:0015923//mannosidase activity	GO:0019318//hexose metabolic process	gi|21245094|ref|NP_640349.1|/0/alpha-mannosidase 2C1 [Rattus norvegicus]
ENSRNOG00000016837	Ckm	-2.69946	0.873965	K00933|1|0.0|728|rno:24265|creatine kinase [EC:2.7.3.2]	GO:0044444//cytoplasmic part	GO:0016301//kinase activity;GO:0032559	GO:0006603//phosphocreatine metabolic process;GO:0006796//phosphate-containing compound metabolic process	gi|6978661|ref|NP_036662.1|/0/creatine kinase M-type [Rattus norvegicus]
ENSRNOG00000010077	Smarcd3	2.28189	0.838715	K11650|1|0.0|811|rno:296732|SWI/SNF-related matrix-associated actin-dependent regulator of chromatin subfamily D	GO:0031981//nuclear lumen;GO:0070603	GO:0003712//transcription cofactor activity;GO:0051427	GO:0006629//lipid metabolic process;GO:0006355//regulation of transcription, DNA-dependent;GO:0009887//organ morphogenesis;GO:0030154//cell differentiation;GO:0006325//chromatin organization;GO:0051098//regulation of binding	gi|58865508|ref|NP_001011966.1|/0/SWI/SNF-related matrix-associated actin-dependent regulator of chromatin subfamily D member 3 [Rattus norvegicus]
ENSRNOG00000013195	Ruvbl1	2.509	0.830627	K04499|1|0.0|890|rno:65137|RuvB-like protein 1 (pontin 52)	GO:0034399//nuclear periphery;GO:0015630//microtubule cytoskeleton;GO:0043189//H4/H2A histone acetyltransferase complex;GO:0035097//histone methyltransferase complex	GO:0004386//helicase activity;GO:0032559	GO:0006355//regulation of transcription, DNA-dependent;GO:0006259//DNA metabolic process;GO:0048232//male gamete generation;GO:0000087//M phase of mitotic cell cycle;GO:0043486//histone exchange;GO:0016573//histone acetylation	gi|9790083|ref|NP_062659.1|/0/ruvB-like 1 [Mus musculus]
ENSRNOG00000015953	Oaz2	-2.63379	0.859821	-	GO:0043231//intracellular membrane-bounded organelle;GO:0044444//cytoplasmic part	GO:0005488//binding;GO:0004857//enzyme inhibitor activity	GO:0006576//cellular biogenic amine metabolic process;GO:0006520//cellular amino acid metabolic process	gi|158187519|ref|NP_001103369.1|/1.68037e-97/ornithine decarboxylase antizyme 2 [Rattus norvegicus]
ENSRNOG00000021051	Cyth2	-2.7962	0.854492	K12495|1|1e-41|171|bfo:BRAFLDRAFT_106693|IQ motif and SEC7 domain-containing protein	GO:0044424//intracellular part;GO:0016020//membrane	GO:0005083//small GTPase regulator activity;GO:0005488//binding	GO:0016192//vesicle-mediated transport;GO:0019222//regulation of metabolic process;GO:0031175//neuron projection development;GO:0007010//cytoskeleton organization;GO:0032011//ARF protein signal transduction;GO:0007155//cell adhesion	gi|332241233|ref|XP_003269786.1|/0/PREDICTED: cytohesin-2 isoform 2 [Nomascus leucogenys]
ENSRNOG00000013604	GPX4	1.62612	0.837378	K05361|1|2e-117|422|rno:29328|phospholipid-hydroperoxide glutathione peroxidase [EC:1.11.1.12]	GO:0043231//intracellular membrane-bounded organelle;GO:0019866//organelle inner membrane;GO:0044444//cytoplasmic part;GO:0012505//endomembrane system	GO:0042277//peptide binding;GO:0016705//oxidoreductase activity, acting on paired donors, with incorporation or reduction of molecular oxygen;GO:0004601//peroxidase activity	GO:0043627//response to estrogen stimulus;GO:0051276//chromosome organization;GO:0006790//sulfur compound metabolic process;GO:0048232//male gamete generation;GO:0042743//hydrogen peroxide metabolic process;GO:0031347//regulation of defense response;GO:0032502//developmental process	gi|90903229|ref|NP_001034938.1|/1.31031e-116/phospholipid hydroperoxide glutathione peroxidase, nuclear isoform B [Rattus norvegicus]
ENSRNOG00000010735	Nfyc	2.6836	0.843412	K08066|1|1e-114|414|ecb:100053895|nuclear transcription factor Y, gamma	GO:0005667//transcription factor complex	GO:0003712//transcription cofactor activity;GO:0003676//nucleic acid binding;GO:0001071//nucleic acid binding transcription factor activity	GO:0044267//cellular protein metabolic process;GO:0006355//regulation of transcription, DNA-dependent	gi|31560663|ref|NP_032718.2|/8.24081e-114/nuclear transcription factor Y subunit gamma isoform 1 [Mus musculus]
ENSRNOG00000029028	Mknk2	-2.20473	0.845898	K04372|1|0.0|910|rno:299618|MAP kinase interacting serine/threonine kinase [EC:2.7.11.1]	-	GO:0043169//cation binding;GO:0004672//protein kinase activity;GO:0032559	GO:0035556//intracellular signal transduction;GO:0006464//cellular protein modification process;GO:0006412//translation;GO:0006796//phosphate-containing compound metabolic process	gi|58865538|ref|NP_001011985.1|/0/MAP kinase-interacting serine/threonine-protein kinase 2 [Rattus norvegicus]
ENSRNOG00000015857	Ctsa	-2.17809	0.841706	K13289|1|0.0|887|rno:296370|cathepsin A (carboxypeptidase C) [EC:3.4.16.5]	GO:0000323//lytic vacuole;GO:0031981//nuclear lumen	GO:0005488//binding;GO:0004180//carboxypeptidase activity	GO:0019538//protein metabolic process	gi|58865488|ref|NP_001011959.1|/0/lysosomal protective protein precursor [Rattus norvegicus]
ENSRNOG00000028047	Mecr	-2.50961	0.806319	K07512|1|0.0|706|rno:29470|mitochondrial trans-2-enoyl-CoA reductase [EC:1.3.1.38]	GO:0043231//intracellular membrane-bounded organelle;GO:0044444//cytoplasmic part	GO:0046914//transition metal ion binding;GO:0016628//oxidoreductase activity, acting on the CH-CH group of donors, NAD or NADP as acceptor;GO:0005102//receptor binding	GO:0006631//fatty acid metabolic process	gi|149024113|gb|EDL80610.1|/0/mitochondrial trans-2-enoyl-CoA reductase, isoform CRA_b [Rattus norvegicus]
ENSRNOG00000015124	Gpam	-1.97234	0.806814	K00629|1|0.0|1588|rno:29653|glycerol-3-phosphate O-acyltransferase 1/2 [EC:2.3.1.15]	GO:0031966//mitochondrial membrane;GO:0031224//intrinsic to membrane;GO:0019866//organelle inner membrane	GO:0008374//O-acyltransferase activity	GO:0006732//coenzyme metabolic process;GO:0070233//negative regulation of T cell apoptotic process;GO:0032868//response to insulin stimulus;GO:0055088//lipid homeostasis;GO:0042102//positive regulation of T cell proliferation;GO:0001817//regulation of cytokine production;GO:0002252;GO:0010038//response to metal ion;GO:0032787//monocarboxylic acid metabolic process;GO:0009746;GO:0009991//response …	gi|149040413|gb|EDL94451.1|/0/glycerol-3-phosphate acyltransferase, mitochondrial, isoform CRA_a [Rattus norvegicus]
ENSRNOG00000008989	Cryl1	-2.23941	0.829616	K13247|1|9e-149|527|rno:290277|L-gulonate 3-dehydrogenase [EC:1.1.1.45]	GO:0044444//cytoplasmic part	GO:0042802//identical protein binding;GO:0051287//NAD binding;GO:0016616//oxidoreductase activity, acting on the CH-OH group of donors, NAD or NADP as acceptor;GO:0005198//structural molecule activity	GO:0032787//monocarboxylic acid metabolic process	gi|28461157|ref|NP_786933.1|/7.64669e-148/lambda-crystallin homolog [Rattus norvegicus]
ENSRNOG00000013949	Idh2	-3.75489	0.906172	K00031|1|0.0|934|rno:361596|isocitrate dehydrogenase [EC:1.1.1.42]	GO:0019866//organelle inner membrane;GO:0044429//mitochondrial part	GO:0046872//metal ion binding;GO:0004448//isocitrate dehydrogenase activity;GO:0000166//nucleotide binding	GO:0050896//response to stimulus;GO:0043648//dicarboxylic acid metabolic process;GO:0044262//cellular carbohydrate metabolic process;GO:0009060//aerobic respiration	gi|62079055|ref|NP_001014183.1|/0/isocitrate dehydrogenase [NADP], mitochondrial precursor [Rattus norvegicus]
ENSRNOG00000046741	Itsn2	-2.75486	0.824592	K12331|1|1e-27|127|xtr:100489979|Rho guanine nucleotide exchange factor 11;K07532|2|3e-27|125|mdo:100030904|Rho guanine nucleotide exchange factor 12	GO:0044424//intracellular part;GO:0044424//intracellular part	GO:0005088//Ras guanyl-nucleotide exchange factor activity;GO:0046872//metal ion binding;GO:0030674//protein binding, bridging;GO:0005088//Ras guanyl-nucleotide exchange factor activity;GO:0046872//metal ion binding	GO:0019222//regulation of metabolic process;GO:0007266//Rho protein signal transduction;GO:0016192//vesicle-mediated transport;GO:0019222//regulation of metabolic process;GO:0007266//Rho protein signal transduction;GO:0016192//vesicle-mediated transport	gi|392340953|ref|XP_001067254.3|/0/PREDICTED: intersectin-2 isoform 3 [Rattus norvegicus]
ENSRNOG00000018939	Rexo2	2.1803	0.837999	K13288|1|4e-105|382|rno:300689|oligoribonuclease [EC:3.1.-.-]	GO:0043231//intracellular membrane-bounded organelle	GO:0005488//binding;GO:0004532//exoribonuclease activity	GO:0034641//cellular nitrogen compound metabolic process	gi|56605730|ref|NP_001008327.1|/3.07342e-104/oligoribonuclease, mitochondrial precursor [Rattus norvegicus]
ENSRNOG00000011745	Psma1	-2.16045	0.854418	K02725|1|7e-141|500|cfa:476867|20S proteasome subunit alpha 6 [EC:3.4.25.1]	GO:0043231//intracellular membrane-bounded organelle;GO:0005839//proteasome core complex;GO:0030529//ribonucleoprotein complex	GO:0004175//endopeptidase activity;GO:0003676//nucleic acid binding	GO:0043161//proteasomal ubiquitin-dependent protein catabolic process;GO:0051320//S phase;GO:0002437//inflammatory response to antigenic stimulus;GO:0007050//cell cycle arrest;GO:0016070//RNA metabolic process;GO:0051439//regulation of ubiquitin-protein ligase activity involved in mitotic cell cycle;GO:0006520//cellular amino acid metabolic process;GO:0006915//apoptotic process;GO:0030330//DNA da…	gi|8394060|ref|NP_058974.1|/5.86031e-140/proteasome subunit alpha type-1 [Rattus norvegicus]
ENSRNOG00000020179	Nt5c2	2.51042	0.829373	K01081|1|0.0|1059|rno:100363253|5'-nucleotidase [EC:3.1.3.5]	GO:0044444//cytoplasmic part	GO:0008252//nucleotidase activity;GO:0043169//cation binding	GO:0006163//purine nucleotide metabolic process;GO:0009112;GO:0006796//phosphate-containing compound metabolic process	gi|293356572|ref|XP_002728937.1|/0/PREDICTED: cytosolic purine 5'-nucleotidase-like [Rattus norvegicus]
ENSRNOG00000017965	Afg3l2	-2.70335	0.865108	K08956|1|0.0|1403|rno:307350|AFG3 family protein [EC:3.4.24.-]	GO:0031224//intrinsic to membrane;GO:0043231//intracellular membrane-bounded organelle;GO:0019866//organelle inner membrane	GO:0004175//endopeptidase activity;GO:0046914//transition metal ion binding;GO:0005515//protein binding;GO:0016462//pyrophosphatase activity;GO:0032559	GO:0060004//reflex;GO:0008366//axon ensheathment;GO:0048741//skeletal muscle fiber development;GO:0048667//cell morphogenesis involved in neuron differentiation;GO:0035264//multicellular organism growth;GO:0019538//protein metabolic process;GO:0009057//macromolecule catabolic process	gi|198442897|ref|NP_001128336.1|/0/AFG3-like protein 2 [Rattus norvegicus]
ENSRNOG00000007034	Hipk2	-2.10267	0.845582	K08826|1|0.0|2131|rno:362342|homeodomain interacting protein kinase [EC:2.7.11.1]	GO:0005815//microtubule organizing center;GO:0016604//nuclear body;GO:0005635//nuclear envelope	GO:0005515//protein binding;GO:0003712//transcription cofactor activity;GO:0004672//protein kinase activity;GO:0003676//nucleic acid binding;GO:0032559	GO:0043410//positive regulation of MAPK cascade;GO:0051099//positive regulation of binding;GO:0050881//musculoskeletal movement;GO:0007179//transforming growth factor beta receptor signaling pathway;GO:0006357//regulation of transcription from RNA polymerase II promoter;GO:0008283//cell proliferation;GO:0008630//intrinsic apoptotic signaling pathway in response to DNA damage response;GO:0006796//…	gi|157820597|ref|NP_001102092.1|/0/homeodomain-interacting protein kinase 2 [Rattus norvegicus]
ENSRNOG00000002418	Tgfb2	-1.95245	0.822896	K13376|1|0.0|777|rno:81809|transforming growth factor beta-2	GO:0031091//platelet alpha granule;GO:0005578//proteinaceous extracellular matrix;GO:0044431//Golgi apparatus part;GO:0043005//neuron projection;GO:0044297//cell body	GO:0005160//transforming growth factor beta receptor binding;GO:0042802//identical protein binding;GO:0004674//protein serine/threonine kinase activity;GO:0046983//protein dimerization activity	GO:0043065//positive regulation of apoptotic process;GO:0048534;GO:0001837//epithelial to mesenchymal transition;GO:0009628//response to abiotic stimulus;GO:0009611//response to wounding;GO:0001944//vasculature development;GO:0042417//dopamine metabolic process;GO:0030595//leukocyte chemotaxis;GO:0014855;GO:0030278//regulation of ossification;GO:0016337//cell-cell adhesion;GO:0043029//T cell home…	gi|149040974|gb|EDL94931.1|/0/transforming growth factor, beta 2, isoform CRA_a [Rattus norvegicus]
ENSRNOG00000026742	Ypel5	-2.71349	0.863633	-	-	GO:0016671//oxidoreductase activity, acting on a sulfur group of donors, disulfide as acceptor	GO:0008152//metabolic process	gi|350582577|ref|XP_003481305.1|/8.96826e-69/PREDICTED: protein yippee-like 5-like isoform 6 [Sus scrofa]
ENSRNOG00000017826	Mtrr	-2.45219	0.804444	K00597|1|0.0|949|rno:290947|[methionine synthase] reductase [EC:1.16.1.8]	GO:0044444//cytoplasmic part;GO:0044444//cytoplasmic part	GO:0016723//oxidoreductase activity, oxidizing metal ions, NAD or NADP as acceptor;GO:0016741;GO:0046914//transition metal ion binding;GO:0000166//nucleotide binding;GO:0050662//coenzyme binding;GO:0016723//oxidoreductase activity, oxidizing metal ions, NAD or NADP as acceptor;GO:0016741;GO:0046914//transition metal ion binding;GO:0000166//nucleotide binding;GO:0050662//coenzyme binding	GO:0000097//sulfur amino acid biosynthetic process;GO:0006730//one-carbon metabolic process;GO:0031647//regulation of protein stability;GO:0000097//sulfur amino acid biosynthetic process;GO:0006730//one-carbon metabolic process;GO:0031647//regulation of protein stability	gi|334350868|sp|Q498R1.2|MTRR_RAT/0/RecName: Full=Methionine synthase reductase; Short=MSR
ENSRNOG00000048981	Ahsa1	-2.77487	0.866667	-	GO:0043231//intracellular membrane-bounded organelle;GO:0044444//cytoplasmic part	GO:0008047//enzyme activator activity;GO:0005515//protein binding	GO:0050896//response to stimulus;GO:0044267//cellular protein metabolic process;GO:0043462//regulation of ATPase activity	gi|169234816|ref|NP_001108506.1|/0/uncharacterized protein LOC681996 [Rattus norvegicus]
ENSRNOG00000017183	Ctdp1	-2.45513	0.833186	K15732|1|0.0|1724|rno:291414|RNA polymerase II subunit A C-terminal domain phosphatase [EC:3.1.3.16]	GO:0031981//nuclear lumen	GO:0005488//binding;GO:0034062//RNA polymerase activity;GO:0004722//protein serine/threonine phosphatase activity	GO:0006796//phosphate-containing compound metabolic process;GO:0045935;GO:0006354//DNA-dependent transcription, elongation;GO:0006464//cellular protein modification process	gi|157823025|ref|NP_001099601.1|/0/RNA polymerase II subunit A C-terminal domain phosphatase [Rattus norvegicus]
ENSRNOG00000021781	Camk1	2.20865	0.824455	K08794|1|0.0|735|rno:171503|calcium/calmodulin-dependent protein kinase I [EC:2.7.11.17]	GO:0043231//intracellular membrane-bounded organelle;GO:0043234//protein complex	GO:0004674//protein serine/threonine kinase activity;GO:0005515//protein binding;GO:0032559	GO:0048731;GO:0006796//phosphate-containing compound metabolic process;GO:0023052//signaling;GO:0045597//positive regulation of cell differentiation;GO:0051169//nuclear transport;GO:0006464//cellular protein modification process	gi|431899910|gb|ELK07857.1|/0/Calcium/calmodulin-dependent protein kinase type 1 [Pteropus alecto]
ENSRNOG00000047089	Alkbh7	2.05732	0.830121	K10769|1|3e-106|385|rno:679944|alkylated DNA repair protein alkB homolog 7 [EC:1.14.11.-]	GO:0043231//intracellular membrane-bounded organelle	GO:0016706//oxidoreductase activity, acting on paired donors, with incorporation or reduction of molecular oxygen, 2-oxoglutarate as one donor, and incorporation of one atom each of oxygen into both donors;GO:0043169//cation binding;GO:0016701//oxidoreductase activity, acting on single donors with incorporation of molecular oxygen	GO:0008152//metabolic process	gi|157820455|ref|NP_001102854.1|/2.11851e-105/alkylated DNA repair protein alkB homolog 7 [Rattus norvegicus]
ENSRNOG00000004911	Psmd14	2.75214	0.857599	K03030|1|9e-166|583|ecb:100051409|26S proteasome regulatory subunit N11	GO:0043234//protein complex	GO:0070011;GO:0061135;GO:0016744;GO:0016790//thiolester hydrolase activity;GO:0043169//cation binding;GO:0032403//protein complex binding	GO:0010952//positive regulation of peptidase activity;GO:0043161//proteasomal ubiquitin-dependent protein catabolic process;GO:0016579//protein deubiquitination;GO:0051320//S phase;GO:0007050//cell cycle arrest;GO:0016070//RNA metabolic process;GO:0051439//regulation of ubiquitin-protein ligase activity involved in mitotic cell cycle;GO:0006520//cellular amino acid metabolic process;GO:0006915//a…	gi|471369967|ref|XP_004375497.1|/7.06386e-165/PREDICTED: 26S proteasome non-ATPase regulatory subunit 14 [Trichechus manatus latirostris]
ENSRNOG00000022922	Slc25a12	2.06592	0.843254	K15105|1|0.0|1229|rno:362145|solute carrier family 25 (mitochondrial aspartate/glutamate transporter), member 12/13	GO:0031224//intrinsic to membrane;GO:0043231//intracellular membrane-bounded organelle;GO:0019866//organelle inner membrane	GO:0015172//acidic amino acid transmembrane transporter activity;GO:0046872//metal ion binding	GO:0010038//response to metal ion;GO:0006839//mitochondrial transport;GO:0009206;GO:0015711//organic anion transport;GO:0015980//energy derivation by oxidation of organic compounds;GO:0006006//glucose metabolic process;GO:0006865//amino acid transport	gi|293346045|ref|XP_002726232.1|/0/PREDICTED: LOW QUALITY PROTEIN: calcium-binding mitochondrial carrier protein Aralar1 [Rattus norvegicus]
ENSRNOG00000023095	Npepps	-2.54057	0.838378	K08776|1|0.0|1716|rno:50558|puromycin-sensitive aminopeptidase [EC:3.4.11.-]	GO:0044444//cytoplasmic part;GO:0043231//intracellular membrane-bounded organelle	GO:0046914//transition metal ion binding;GO:0008238//exopeptidase activity	GO:0019538//protein metabolic process	gi|158749540|ref|NP_536320.1|/0/puromycin-sensitive aminopeptidase precursor [Rattus norvegicus]
ENSRNOG00000014330	Pcmt1	-1.57649	0.823897	K00573|1|2e-138|492|mmu:18537|protein-L-isoaspartate(D-aspartate) O-methyltransferase [EC:2.1.1.77]	GO:0043231//intracellular membrane-bounded organelle	GO:0005515//protein binding;GO:0003824//catalytic activity	GO:0006790//sulfur compound metabolic process;GO:0008213;GO:0006575//cellular modified amino acid metabolic process	gi|149039523|gb|EDL93685.1|/1.04849e-138/protein-L-isoaspartate (D-aspartate) O-methyltransferase 1, isoform CRA_d [Rattus norvegicus]
ENSRNOG00000012709	Bag2	-2.07039	0.83664	K09556|1|3e-91|336|rno:690038|BCL2-associated athanogene 2	-	GO:0005488//binding	GO:0044267//cellular protein metabolic process;GO:0012501//programmed cell death	gi|189491875|ref|NP_001121667.1|/2.50756e-90/BAG family molecular chaperone regulator 2 [Rattus norvegicus]
ENSRNOG00000004883	Erh	1.86471	0.836472	-	GO:0044464//cell part	GO:0005488//binding	GO:0006952//defense response;GO:0009116//nucleoside metabolic process	gi|157822151|ref|NP_001102912.1|/3.60579e-66/enhancer of rudimentary homolog [Rattus norvegicus]
ENSRNOG00000011463	Psmb2	-2.4509	0.859579	K02734|1|3e-99|361|rno:29675|20S proteasome subunit beta 4 [EC:3.4.25.1]	GO:0043231//intracellular membrane-bounded organelle;GO:0000502//proteasome complex	GO:0004175//endopeptidase activity	GO:0043161//proteasomal ubiquitin-dependent protein catabolic process;GO:0010033//response to organic substance;GO:0051320//S phase;GO:0007050//cell cycle arrest;GO:0016070//RNA metabolic process;GO:0051439//regulation of ubiquitin-protein ligase activity involved in mitotic cell cycle;GO:0006520//cellular amino acid metabolic process;GO:0006915//apoptotic process;GO:0030330//DNA damage response,…	gi|8394079|ref|NP_058980.1|/2.41531e-98/proteasome subunit beta type-2 [Rattus norvegicus]
ENSRNOG00000011782	Got2	2.33045	0.863412	K14455|1|0.0|834|rno:25721|aspartate aminotransferase, mitochondrial [EC:2.6.1.1]	GO:0032991//macromolecular complex;GO:0019866//organelle inner membrane;GO:0044429//mitochondrial part;GO:0043025//neuronal cell body	GO:0008483//transaminase activity;GO:0042802//identical protein binding;GO:0008289//lipid binding;GO:0031406//carboxylic acid binding;GO:0048037//cofactor binding	GO:0006103//2-oxoglutarate metabolic process;GO:0009064//glutamine family amino acid metabolic process;GO:0006869//lipid transport;GO:0006006//glucose metabolic process;GO:0006531//aspartate metabolic process;GO:0010033//response to organic substance	gi|6980972|ref|NP_037309.1|/0/aspartate aminotransferase, mitochondrial [Rattus norvegicus]
ENSRNOG00000016454	Nasp	-2.02106	0.815303	K11291|1|0.0|1219|rno:298441|nuclear autoantigenic sperm protein	GO:0043231//intracellular membrane-bounded organelle	GO:0031072//heat shock protein binding	GO:0006259//DNA metabolic process;GO:0001701//in utero embryonic development;GO:0034728//nucleosome organization;GO:0006810//transport	gi|53850614|ref|NP_001005543.1|/0/nuclear autoantigenic sperm protein [Rattus norvegicus]
ENSRNOG00000013000	Ldhb	-3.856	0.910669	K00016|1|0.0|661|rno:24534|L-lactate dehydrogenase [EC:1.1.1.27]	GO:0043231//intracellular membrane-bounded organelle;GO:0044444//cytoplasmic part	GO:0004457//lactate dehydrogenase activity;GO:0005515//protein binding;GO:0000166//nucleotide binding	GO:0006007//glucose catabolic process;GO:0032787//monocarboxylic acid metabolic process;GO:0046496//nicotinamide nucleotide metabolic process	gi|6981146|ref|NP_036727.1|/0/L-lactate dehydrogenase B chain [Rattus norvegicus]
ENSRNOG00000001517	Pdk1	-2.71646	0.868436	K12077|1|0.0|805|rno:116551|pyruvate dehydrogenase kinase isoform 1 [EC:2.7.11.2]	GO:0043234//protein complex;GO:0044429//mitochondrial part	GO:0004673//protein histidine kinase activity;GO:0042802//identical protein binding;GO:0046983//protein dimerization activity;GO:0032559	GO:0006468//protein phosphorylation;GO:0035556//intracellular signal transduction;GO:0019318//hexose metabolic process;GO:0006086//acetyl-CoA biosynthetic process from pyruvate	gi|59709473|ref|NP_446278.2|/0/pyruvate dehydrogenase kinase, isozyme 1 precursor [Rattus norvegicus]
ENSRNOG00000019459	Oaz1	-2.18218	0.859431	K12752|1|4e-15|82.8|ame:551149|myosin light chain, invertebrate	GO:0044444//cytoplasmic part	GO:0005488//binding;GO:0004857//enzyme inhibitor activity	GO:0019222//regulation of metabolic process;GO:0006595//polyamine metabolic process;GO:0006520//cellular amino acid metabolic process	gi|23397676|ref|NP_620781.1|/2.29702e-129/ornithine decarboxylase antizyme 1 [Rattus norvegicus]
ENSRNOG00000045613	Ckmt2	-3.50453	0.897641	K00933|1|3e-176|618|rno:688698|creatine kinase [EC:2.7.3.2]	GO:0043231//intracellular membrane-bounded organelle;GO:0030016//myofibril;GO:0019866//organelle inner membrane	GO:0016301//kinase activity;GO:0032559	GO:0006796//phosphate-containing compound metabolic process;GO:0003012//muscle system process;GO:0006603//phosphocreatine metabolic process	gi|38259206|ref|NP_940807.1|/2.0941e-175/creatine kinase S-type, mitochondrial precursor [Mus musculus]
ENSRNOG00000030225	Clpx	-1.4398	0.815082	K03544|1|0.0|1065|rno:300786|ATP-dependent Clp protease ATP-binding subunit ClpX	GO:0019866//organelle inner membrane;GO:0005759//mitochondrial matrix	GO:0043169//cation binding;GO:0008047//enzyme activator activity;GO:0042623//ATPase activity, coupled;GO:0005515//protein binding;GO:0032559	GO:0044267//cellular protein metabolic process;GO:0006508//proteolysis;GO:0051345//positive regulation of hydrolase activity	gi|56119122|ref|NP_001007804.1|/0/ATP-dependent Clp protease ATP-binding subunit clpX-like, mitochondrial precursor [Rattus norvegicus]
ENSRNOG00000002352	Tsen15	2.12208	0.837177	K15324|1|5e-63|241|rno:289083|tRNA-splicing endonuclease subunit Sen15	GO:0031981//nuclear lumen	GO:0004518//nuclease activity	GO:0006399//tRNA metabolic process;GO:0006396//RNA processing	gi|157786992|ref|NP_001099428.1|/3.76383e-62/tRNA-splicing endonuclease subunit Sen15 [Rattus norvegicus]
ENSRNOG00000018610	Pde6d	-1.95871	0.805814	K13758|1|3e-81|302|mmu:18582|retinal rod rhodopsin-sensitive cGMP 3',5'-cyclic phosphodiesterase subunit delta	-	GO:0005488//binding;GO:0004114//3',5'-cyclic-nucleotide phosphodiesterase activity;GO:0004857//enzyme inhibitor activity	GO:0019222//regulation of metabolic process;GO:0050953//sensory perception of light stimulus;GO:0006184//GTP catabolic process;GO:0007165//signal transduction	gi|426338880|ref|XP_004033399.1|/5.27683e-84/PREDICTED: retinal rod rhodopsin-sensitive cGMP 3',5'-cyclic phosphodiesterase subunit delta [Gorilla gorilla gorilla]
ENSRNOG00000010352	Dnajc3	-2.66236	0.851006	K09523|1|0.0|894|rno:63880|DnaJ homolog subfamily C member 3	GO:0030867//rough endoplasmic reticulum membrane	GO:0005515//protein binding;GO:0019887//protein kinase regulator activity	GO:0051707//response to other organism;GO:0044267//cellular protein metabolic process;GO:0006508//proteolysis;GO:0033673//negative regulation of kinase activity;GO:0006950//response to stress	gi|73620810|sp|Q9R0T3.3|DNJC3_RAT/0/RecName: Full=DnaJ homolog subfamily C member 3; AltName: Full=Interferon-induced, double-stranded RNA-activated protein kinase inhibitor; AltName: Full=Protein kinase inhibitor of 58 kDa; Short=Protein kinase inhibitor p58; Flags: Precursor
ENSRNOG00000040040	Ndufaf6	2.3289	0.828373	-	GO:0043231//intracellular membrane-bounded organelle	GO:0003824//catalytic activity	GO:0008152//metabolic process	gi|451172113|ref|NP_001263370.1|/0/NADH dehydrogenase (ubiquinone) complex I, assembly factor 6 precursor [Rattus norvegicus]
ENSRNOG00000047246	Chtf8	2.23389	0.819431	K11270|1|2e-63|244|rno:364996|chromosome transmission fidelity protein 8	GO:0043231//intracellular membrane-bounded organelle	-	GO:0006259//DNA metabolic process	gi|298351630|sp|B2RYL1.1|CTF8A_RAT/0/RecName: Full=Chromosome transmission fidelity protein 8 homolog isoform 2
ENSRNOG00000020684	Vat1	-1.94865	0.823339	K00540|1|6e-171|602|mmu:26949|[EC:1.-.-.-];K10133|3|2e-21|105|mgp:100545625|tumor protein p53-inducible protein 3 [EC:1.-.-.-];K00344|5|5e-21|103|rno:362061|NADPH2:quinone reductase [EC:1.6.5.5]	GO:0044424//intracellular part;GO:0031224//intrinsic to membrane	GO:0046914//transition metal ion binding;GO:0003824//catalytic activity	GO:0008152//metabolic process	gi|76096306|ref|NP_001028855.1|/3.8274e-173/synaptic vesicle membrane protein VAT-1 homolog [Rattus norvegicus]
ENSRNOG00000016460	Clu	3.84207	0.909795	-	GO:0030427//site of polarized growth;GO:0016234//inclusion body;GO:0034364//high-density lipoprotein particle;GO:0031091//platelet alpha granule;GO:0042995//cell projection	GO:0005515//protein binding	GO:0070848//response to growth factor stimulus;GO:0008637//apoptotic mitochondrial changes;GO:0007599//hemostasis;GO:0031016//pancreas development;GO:0051707//response to other organism;GO:0002455//humoral immune response mediated by circulating immunoglobulin;GO:0008283//cell proliferation;GO:0006887//exocytosis;GO:0032460//negative regulation of protein oligomerization;GO:0030301//cholesterol t…	gi|149030313|gb|EDL85369.1|/0/clusterin, isoform CRA_a [Rattus norvegicus]
ENSRNOG00000026775	Pmpca	-2.15236	0.846151	K01412|1|0.0|877|rno:296588|mitochondrial processing peptidase [EC:3.4.24.64]	GO:0019866//organelle inner membrane;GO:0044429//mitochondrial part;GO:0019866//organelle inner membrane;GO:0044429//mitochondrial part	GO:0004175//endopeptidase activity;GO:0046914//transition metal ion binding;GO:0004175//endopeptidase activity;GO:0046914//transition metal ion binding	GO:0019538//protein metabolic process;GO:0019538//protein metabolic process	gi|127287|sp|P20069.1|MPPA_RAT/0/RecName: Full=Mitochondrial-processing peptidase subunit alpha; AltName: Full=Alpha-MPP; AltName: Full=P-55; Flags: Precursor
ENSRNOG00000005987	Suox	-2.72967	0.818199	K00387|1|0.0|1077|rno:81805|sulfite oxidase [EC:1.8.3.1]	GO:0005740//mitochondrial envelope	GO:0005506//iron ion binding;GO:0050662//coenzyme binding;GO:0016670//oxidoreductase activity, acting on a sulfur group of donors, oxygen as acceptor	GO:0031667//response to nutrient levels;GO:0008152//metabolic process	gi|74024923|ref|NP_112389.3|/0/sulfite oxidase, mitochondrial precursor [Rattus norvegicus]
ENSRNOG00000005177	RGD1304982	-2.52818	0.850837	K00344|1|8e-77|288|nve:NEMVE_v1g238856|NADPH2:quinone reductase [EC:1.6.5.5]	GO:0043231//intracellular membrane-bounded organelle	GO:0046914//transition metal ion binding;GO:0003824//catalytic activity	GO:0008152//metabolic process	gi|190360156|sp|B0BNC9.1|QORL2_RAT/0/RecName: Full=Quinone oxidoreductase-like protein 2
ENSRNOG00000029360	Serinc1	-2.65104	0.86574	-	GO:0031224//intrinsic to membrane;GO:0043231//intracellular membrane-bounded organelle;GO:0031090//organelle membrane	GO:0005488//binding;GO:0034061;GO:0015179//L-amino acid transmembrane transporter activity	GO:0006643//membrane lipid metabolic process;GO:0006260//DNA replication;GO:0006650//glycerophospholipid metabolic process;GO:0043085//positive regulation of catalytic activity;GO:0015807//L-amino acid transport	gi|33636726|ref|NP_891996.1|/0/serine incorporator 1 precursor [Rattus norvegicus]
ENSRNOG00000009963	Ctps1	-2.32964	0.846793	K01937|1|0.0|1088|rno:313560|CTP synthase [EC:6.3.4.2]	GO:0044444//cytoplasmic part	GO:0016879//ligase activity, forming carbon-nitrogen bonds;GO:0032559	GO:0009209;GO:0009064//glutamine family amino acid metabolic process;GO:0042221//response to chemical stimulus	gi|199560247|ref|NP_001128345.1|/0/CTP synthase 1 [Rattus norvegicus]
ENSRNOG00000047052	Clpp	2.46137	0.855482	K01358|1|1e-123|443|rno:301117|ATP-dependent Clp protease, protease subunit [EC:3.4.21.92]	GO:0044429//mitochondrial part	GO:0004175//endopeptidase activity;GO:0005515//protein binding;GO:0032559	GO:0019538//protein metabolic process;GO:0051259//protein oligomerization	gi|149028159|gb|EDL83597.1|/8.6049e-123/similar to Putative ATP-dependent Clp protease proteolytic subunit, mitochondrial precursor (Endopeptidase Clp) [Rattus norvegicus]
ENSRNOG00000013254	Dctn6	1.3953	0.8093	K10428|1|1e-97|357|rno:290798|dynactin 6	GO:0005875//microtubule associated complex;GO:0043231//intracellular membrane-bounded organelle	GO:0005515//protein binding;GO:0003824//catalytic activity	GO:0006629//lipid metabolic process;GO:0006996//organelle organization	gi|157823924|ref|NP_001099555.1|/8.11018e-97/dynactin subunit 6 [Rattus norvegicus]
ENSRNOG00000019868	Psma5	-1.59374	0.827499	K02729|1|2e-132|472|cfa:100856348|20S proteasome subunit alpha 5 [EC:3.4.25.1]	GO:0043231//intracellular membrane-bounded organelle;GO:0005839//proteasome core complex	GO:0004175//endopeptidase activity;GO:0005488//binding	GO:0043161//proteasomal ubiquitin-dependent protein catabolic process;GO:0051320//S phase;GO:0007050//cell cycle arrest;GO:0016070//RNA metabolic process;GO:0051439//regulation of ubiquitin-protein ligase activity involved in mitotic cell cycle;GO:0006520//cellular amino acid metabolic process;GO:0006915//apoptotic process;GO:0030330//DNA damage response, signal transduction by p53 class mediator	gi|7106387|ref|NP_036097.1|/1.71225e-131/proteasome subunit alpha type-5 [Mus musculus]
ENSRNOG00000015173	Mbtps1	-2.01002	0.801864	K08653|1|0.0|2081|rno:89842|membrane-bound transcription factor site-1 protease [EC:3.4.21.112]	GO:0031224//intrinsic to membrane;GO:0044432//endoplasmic reticulum part;GO:0031090//organelle membrane;GO:0012505//endomembrane system;GO:0044431//Golgi apparatus part	GO:0004175//endopeptidase activity	GO:0042306//regulation of protein import into nucleus;GO:0019538//protein metabolic process;GO:0016125//sterol metabolic process	gi|149038310|gb|EDL92670.1|/0/membrane-bound transcription factor peptidase, site 1 [Rattus norvegicus]
ENSRNOG00000018569	Ahcyl1	2.37464	0.838389	K01251|1|0.0|858|rno:362013|adenosylhomocysteinase [EC:3.3.1.1]	-	GO:0016802	GO:0044237//cellular metabolic process	gi|157819079|ref|NP_001102031.1|/0/putative adenosylhomocysteinase 2 [Rattus norvegicus]
ENSRNOG00000016496	Ctsc	-1.98381	0.826119	K01275|1|0.0|959|rno:25423|cathepsin C [EC:3.4.14.1]	GO:0000323//lytic vacuole	GO:0004175//endopeptidase activity;GO:0005515//protein binding;GO:0043168	GO:0019538//protein metabolic process;GO:0032502//developmental process;GO:0002376//immune system process;GO:0042221//response to chemical stimulus	gi|8393218|ref|NP_058793.1|/0/dipeptidyl peptidase 1 precursor [Rattus norvegicus]
ENSRNOG00000016416	Rnh1	2.50686	0.856619	K12800|1|6e-65|249|acs:100552241|NACHT, LRR and PYD domains-containing protein 3	GO:0043234//protein complex;GO:0044424//intracellular part	GO:0005488//binding;GO:0004857//enzyme inhibitor activity	GO:0006401//RNA catabolic process;GO:0019222//regulation of metabolic process;GO:0022603//regulation of anatomical structure morphogenesis	gi|398303848|ref|NP_001257691.1|/0/ribonuclease inhibitor isoform a [Rattus norvegicus]
ENSRNOG00000000558	Ppa1	2.08897	0.844086	K01507|1|3e-175|615|rno:294504|inorganic pyrophosphatase [EC:3.6.1.1]	GO:0044444//cytoplasmic part	GO:0046872//metal ion binding;GO:0016462//pyrophosphatase activity	GO:0006412//translation;GO:0006796//phosphate-containing compound metabolic process	gi|71122474|gb|AAH99794.1|/0/Ppa1 protein [Rattus norvegicus]
ENSRNOG00000024602	Plekha7	-3.56203	0.838989	K06082|1|4e-07|56.2|dre:567490|FERM, RhoGEF and pleckstrin domain protein 2;K03426|5|2e-06|53.9|ssc:100512459|NAD+ diphosphatase [EC:3.6.1.22]	GO:0005815//microtubule organizing center;GO:0005913//cell-cell adherens junction	GO:0005515//protein binding	GO:0016337//cell-cell adhesion;GO:0045217//cell-cell junction maintenance	gi|221554497|ref|NP_001138333.1|/1.11715e-151/pleckstrin homology domain containing, family A member 7 [Rattus norvegicus]
ENSRNOG00000007316	Idh3B	2.83511	0.875219	K00030|1|0.0|709|rno:94173|isocitrate dehydrogenase (NAD+) [EC:1.1.1.41]	GO:0030062//mitochondrial tricarboxylic acid cycle enzyme complex	GO:0046872//metal ion binding;GO:0004448//isocitrate dehydrogenase activity;GO:0000166//nucleotide binding	GO:0043648//dicarboxylic acid metabolic process;GO:0019674//NAD metabolic process;GO:0009060//aerobic respiration	gi|55926203|ref|NP_446033.1|/0/isocitrate dehydrogenase [NAD] subunit beta, mitochondrial precursor [Rattus norvegicus]
ENSRNOG00000039091	Pnpla8	-2.63327	0.852512	K01047|1|3e-24|115|ame:410570|phospholipase A2 [EC:3.1.1.4]	GO:0031224//intrinsic to membrane;GO:0031090//organelle membrane;GO:0012505//endomembrane system;GO:0044439	GO:0004623//phospholipase A2 activity;GO:0032559	GO:0006629//lipid metabolic process;GO:0032787//monocarboxylic acid metabolic process	gi|392340992|ref|XP_003754218.1|/0/PREDICTED: calcium-independent phospholipase A2-gamma [Rattus norvegicus]
ENSRNOG00000020723	Pten	-2.24445	0.830111	K01110|1|0.0|786|rno:50557|phosphatidylinositol-3,4,5-trisphosphate 3-phosphatase [EC:3.1.3.67]	GO:0044459//plasma membrane part;GO:0016604//nuclear body;GO:0030425//dendrite;GO:0044444//cytoplasmic part	GO:0046872//metal ion binding;GO:0034593//phosphatidylinositol bisphosphate phosphatase activity;GO:0019904//protein domain specific binding;GO:0034594//phosphatidylinositol trisphosphate phosphatase activity;GO:0004721//phosphoprotein phosphatase activity;GO:0070851//growth factor receptor binding	GO:0001932//regulation of protein phosphorylation;GO:0016055//Wnt receptor signaling pathway;GO:0048017//inositol lipid-mediated signaling;GO:0048167//regulation of synaptic plasticity;GO:0006470//protein dephosphorylation;GO:0003006//developmental process involved in reproduction;GO:0007169//transmembrane receptor protein tyrosine kinase signaling pathway;GO:0050851//antigen receptor-mediated si…	gi|13928830|ref|NP_113794.1|/0/phosphatidylinositol-3,4,5-trisphosphate 3-phosphatase and dual-specificity protein phosphatase PTEN [Rattus norvegicus]
ENSRNOG00000021138	Cers2	2.19742	0.813491	K04710|1|0.0|731|rno:310667|ceramide synthetase [EC:2.3.1.24]	GO:0031224//intrinsic to membrane;GO:0031090//organelle membrane;GO:0005635//nuclear envelope	GO:0001071//nucleic acid binding transcription factor activity;GO:0003677//DNA binding;GO:0016410//N-acyltransferase activity	GO:0006672//ceramide metabolic process;GO:0006351//transcription, DNA-dependent	gi|195976786|ref|NP_001028872.2|/0/LAG1 homolog, ceramide synthase 2 [Rattus norvegicus]
ENSRNOG00000028166	Asmtl	-2.58868	0.837988	K06287|1|2e-54|213|mmu:69099|septum formation protein	-	GO:0008171//O-methyltransferase activity	GO:0030186//melatonin metabolic process	gi|318104865|ref|NP_001099385.2|/8.32516e-119/acetylserotonin O-methyltransferase-like [Rattus norvegicus]
ENSRNOG00000012067	Fam111a	-2.67812	0.8592	-	-	GO:0004175//endopeptidase activity	GO:0019538//protein metabolic process	gi|157821173|ref|NP_001102633.1|/0/uncharacterized protein LOC499322 [Rattus norvegicus]
ENSRNOG00000014097	Psmd7	2.18155	0.853807	K03038|1|2e-145|516|rno:307821|26S proteasome regulatory subunit N8	GO:0022624//proteasome accessory complex	GO:0005488//binding	GO:0043161//proteasomal ubiquitin-dependent protein catabolic process;GO:0051320//S phase;GO:0007050//cell cycle arrest;GO:0016070//RNA metabolic process;GO:0051439//regulation of ubiquitin-protein ligase activity involved in mitotic cell cycle;GO:0006520//cellular amino acid metabolic process;GO:0006915//apoptotic process;GO:0030330//DNA damage response, signal transduction by p53 class mediator	gi|157818107|ref|NP_001100896.1|/1.55956e-144/26S proteasome non-ATPase regulatory subunit 7 [Rattus norvegicus]
ENSRNOG00000016692	Hsdl2	-2.73305	0.868425	K12405|1|3e-14|81.3|xtr:613082|3-hydroxyacyl-CoA dehydrogenase / 3a,7a,12a-trihydroxy-5b-cholest-24-enoyl-CoA hydratase [EC:1.1.1.35 4.2.1.107]	GO:0042579//microbody	GO:0003824//catalytic activity;GO:0005496//steroid binding	GO:0008152//metabolic process	gi|71043858|ref|NP_001020868.1|/3.94335e-143/hydroxysteroid dehydrogenase-like protein 2 [Rattus norvegicus]
ENSRNOG00000014178	Acad9	-2.31581	0.840611	K15980|1|0.0|1195|rno:294973|Acyl-CoA dehydrogenase family member 9 [EC:1.3.99.-]	GO:0043231//intracellular membrane-bounded organelle	GO:0016627//oxidoreductase activity, acting on the CH-CH group of donors;GO:0050662//coenzyme binding	GO:0008152//metabolic process	gi|197313734|ref|NP_861433.2|/0/acyl-CoA dehydrogenase family member 9, mitochondrial [Rattus norvegicus]
ENSRNOG00000009957	Slc25a13	-2.72299	0.838283	K15105|1|0.0|1328|rno:362322|solute carrier family 25 (mitochondrial aspartate/glutamate transporter), member 12/13	GO:0043231//intracellular membrane-bounded organelle;GO:0016021//integral to membrane;GO:0019866//organelle inner membrane	GO:0015172//acidic amino acid transmembrane transporter activity;GO:0046872//metal ion binding	GO:0010038//response to metal ion;GO:0006839//mitochondrial transport;GO:0009206;GO:0015711//organic anion transport;GO:0015980//energy derivation by oxidation of organic compounds;GO:0006006//glucose metabolic process;GO:0006865//amino acid transport	gi|392339831|ref|XP_001054092.3|/0/PREDICTED: calcium-binding mitochondrial carrier protein Aralar2 [Rattus norvegicus]
ENSRNOG00000020941	Psenen	2.12698	0.853038	K06170|1|1e-56|218|rno:292788|presenilin enhancer 2	GO:0016021//integral to membrane;GO:0000139//Golgi membrane	GO:0005488//binding;GO:0004175//endopeptidase activity	GO:0006917//induction of apoptosis;GO:0044267//cellular protein metabolic process;GO:0006516//glycoprotein catabolic process;GO:0007169//transmembrane receptor protein tyrosine kinase signaling pathway;GO:0051604//protein maturation;GO:0044093;GO:0043066//negative regulation of apoptotic process;GO:0033619//membrane protein proteolysis	gi|410983281|ref|XP_003997969.1|/4.45701e-58/PREDICTED: gamma-secretase subunit PEN-2 [Felis catus]
ENSRNOG00000017352	Ctdnep1	2.25797	0.846719	K15731|1|5e-32|139|aag:AaeL_AAEL003412|carboxy-terminal domain RNA polymerase II polypeptide A small phosphatase [EC:3.1.3.16]	GO:0005635//nuclear envelope;GO:0031090//organelle membrane;GO:0031224//intrinsic to membrane;GO:0044444//cytoplasmic part	GO:0004721//phosphoprotein phosphatase activity	GO:0048731;GO:0006464//cellular protein modification process;GO:0006997//nucleus organization;GO:0006796//phosphate-containing compound metabolic process;GO:0048869//cellular developmental process	gi|23956160|ref|NP_080293.1|/5.92675e-130/CTD nuclear envelope phosphatase 1 [Mus musculus]
ENSRNOG00000019303	Srpk3	2.21008	0.820611	K08832|1|0.0|931|rno:293854|serine/threonine-protein kinase SRPK3 [EC:2.7.11.1]	-	GO:0004672//protein kinase activity;GO:0032559	GO:0014706//striated muscle tissue development;GO:0006464//cellular protein modification process;GO:0048513//organ development;GO:0006796//phosphate-containing compound metabolic process;GO:0048869//cellular developmental process	gi|34576547|ref|NP_908934.1|/0/serine/threonine-protein kinase SRPK3 [Rattus norvegicus]
ENSRNOG00000008103	Mdh1	-1.97505	0.855124	K00025|1|2e-176|619|rno:24551|malate dehydrogenase [EC:1.1.1.37]	GO:0005815//microtubule organizing center;GO:0043231//intracellular membrane-bounded organelle	GO:0016615//malate dehydrogenase activity;GO:0000166//nucleotide binding	GO:0043648//dicarboxylic acid metabolic process;GO:0009060//aerobic respiration;GO:0019674//NAD metabolic process;GO:0006006//glucose metabolic process	gi|148675904|gb|EDL07851.1|/4.79918e-180/malate dehydrogenase 1, NAD (soluble), isoform CRA_c [Mus musculus]
ENSRNOG00000011404	Chkb	1.8115	0.812101	K14156|1|0.0|756|rno:29367|choline/ethanolamine kinase [EC:2.7.1.32 2.7.1.82]	-	GO:0016301//kinase activity;GO:0032559	GO:0046335//ethanolamine biosynthetic process;GO:0006656//phosphatidylcholine biosynthetic process;GO:0048513//organ development;GO:0006796//phosphate-containing compound metabolic process	gi|8393104|ref|NP_058873.1|/0/choline/ethanolamine kinase [Rattus norvegicus]
ENSRNOG00000006589	Mif	-1.87292	0.845392	K07253|1|2e-62|238|rno:81683|phenylpyruvate tautomerase [EC:5.3.2.1]	GO:0043231//intracellular membrane-bounded organelle;GO:0044421//extracellular region part	GO:0005102//receptor binding;GO:0016863//intramolecular oxidoreductase activity, transposing C=C bonds;GO:0016862//intramolecular oxidoreductase activity, interconverting keto- and enol-groups	GO:0010467//gene expression;GO:0001976//neurological system process involved in regulation of systemic arterial blood pressure;GO:0050707//regulation of cytokine secretion;GO:0034614//cellular response to reactive oxygen species;GO:0006915//apoptotic process;GO:0010737//protein kinase A signaling cascade;GO:0008284//positive regulation of cell proliferation;GO:0043434//response to peptide hormone…	gi|13591985|ref|NP_112313.1|/1.32091e-61/macrophage migration inhibitory factor [Rattus norvegicus]
ENSRNOG00000003815	Slc25a11	-2.69302	0.870111	K15104|1|3e-176|618|mmu:67863|solute carrier family 25 (mitochondrial oxoglutarate transporter), member 11	GO:0043231//intracellular membrane-bounded organelle;GO:0016021//integral to membrane;GO:0019866//organelle inner membrane	GO:0015140//malate transmembrane transporter activity	GO:0006835//dicarboxylic acid transport;GO:0006006//glucose metabolic process	gi|149053212|gb|EDM05029.1|/6.65807e-177/solute carrier family 25 (mitochondrial carrier; oxoglutarate carrier), member 11, isoform CRA_b [Rattus norvegicus]
ENSRNOG00000018531	Mrps11	2.08204	0.819284	-	GO:0000314//organellar small ribosomal subunit;GO:0043231//intracellular membrane-bounded organelle	GO:0005198//structural molecule activity	GO:0010467//gene expression;GO:0006518//peptide metabolic process	gi|157820717|ref|NP_001102618.1|/8.92349e-89/28S ribosomal protein S11, mitochondrial [Rattus norvegicus]
ENSRNOG00000001890	Txnrd2	-2.4143	0.840253	K00384|1|0.0|1028|rno:50551|thioredoxin reductase (NADPH) [EC:1.8.1.9]	GO:0043231//intracellular membrane-bounded organelle	GO:0042802//identical protein binding;GO:0016209//antioxidant activity;GO:0016651//oxidoreductase activity, acting on NADH or NADPH;GO:0050662//coenzyme binding;GO:0000166//nucleotide binding	GO:0008152//metabolic process;GO:0019725//cellular homeostasis;GO:0048534;GO:0010038//response to metal ion;GO:0000302//response to reactive oxygen species	gi|12018236|ref|NP_072106.1|/0/thioredoxin reductase 2, mitochondrial precursor [Rattus norvegicus]
ENSRNOG00000004500	Myc	2.81553	0.865908	K04377|1|0.0|690|rno:24577|Myc proto-oncogene protein	GO:0043005//neuron projection;GO:0044451//nucleoplasm part;GO:0015630//microtubule cytoskeleton	GO:0001071//nucleic acid binding transcription factor activity;GO:0043566//structure-specific DNA binding;GO:0046983//protein dimerization activity	GO:0051704;GO:0002053//positive regulation of mesenchymal cell proliferation;GO:0044093;GO:0009628//response to abiotic stimulus;GO:0019318//hexose metabolic process;GO:0042471//ear morphogenesis;GO:0000737//DNA catabolic process, endonucleolytic;GO:0001783//B cell apoptotic process;GO:0050877//neurological system process;GO:0000723//telomere maintenance;GO:0043393//regulation of protein binding;…	gi|71834866|ref|NP_036735.2|/0/myc proto-oncogene protein [Rattus norvegicus]
ENSRNOG00000012693	Pmpcb	2.27089	0.854734	K01412|1|0.0|956|rno:64198|mitochondrial processing peptidase [EC:3.4.24.64]	GO:0019866//organelle inner membrane;GO:0044429//mitochondrial part	GO:0004175//endopeptidase activity;GO:0046914//transition metal ion binding	GO:0006626//protein targeting to mitochondrion;GO:0019538//protein metabolic process	gi|122065519|sp|Q03346.3|MPPB_RAT/0/RecName: Full=Mitochondrial-processing peptidase subunit beta; AltName: Full=Beta-MPP; AltName: Full=P-52; Flags: Precursor
ENSRNOG00000005587	Suclg1	-2.32008	0.862622	K01899|1|1e-147|523|rno:114597|succinyl-CoA synthetase alpha subunit [EC:6.2.1.4 6.2.1.5]	GO:0019866//organelle inner membrane;GO:0030062//mitochondrial tricarboxylic acid cycle enzyme complex	GO:0004774//succinate-CoA ligase activity;GO:0046912//transferase activity, transferring acyl groups, acyl groups converted into alkyl on transfer;GO:0032561//guanyl ribonucleotide binding;GO:0046983//protein dimerization activity	GO:0043648//dicarboxylic acid metabolic process;GO:0009060//aerobic respiration;GO:0006732//coenzyme metabolic process	gi|149036441|gb|EDL91059.1|/1.20171e-146/succinate-CoA ligase, GDP-forming, alpha subunit, isoform CRA_b [Rattus norvegicus]
ENSRNOG00000011603	Cab39l	2.79572	0.838452	K08272|1|0.0|664|rno:290291|calcium binding protein 39	GO:0044444//cytoplasmic part	GO:0005488//binding	GO:0019217//regulation of fatty acid metabolic process;GO:0022402//cell cycle process;GO:0007169//transmembrane receptor protein tyrosine kinase signaling pathway	gi|58865404|ref|NP_001011917.1|/0/calcium-binding protein 39-like [Rattus norvegicus]
ENSRNOG00000012966	Acadl	-3.69923	0.90416	K00255|1|0.0|832|rno:25287|long-chain-acyl-CoA dehydrogenase [EC:1.3.99.13]	GO:0005740//mitochondrial envelope	GO:0003997//acyl-CoA oxidase activity;GO:0050662//coenzyme binding;GO:0005504//fatty acid binding;GO:0003995//acyl-CoA dehydrogenase activity	GO:0006635//fatty acid beta-oxidation;GO:0001676//long-chain fatty acid metabolic process;GO:0031327;GO:0009437//carnitine metabolic process;GO:0008203//cholesterol metabolic process;GO:0006579//amino-acid betaine catabolic process;GO:0051260//protein homooligomerization;GO:0045922//negative regulation of fatty acid metabolic process;GO:0048871//multicellular organismal homeostasis	gi|6978431|ref|NP_036951.1|/0/long-chain specific acyl-CoA dehydrogenase, mitochondrial precursor [Rattus norvegicus]
ENSRNOG00000006126	Nup88	2.06245	0.822464	K14318|1|0.0|1427|rno:113929|nuclear pore complex protein Nup88	GO:0031981//nuclear lumen;GO:0044444//cytoplasmic part;GO:0005635//nuclear envelope	GO:0022829//wide pore channel activity	GO:0044238//primary metabolic process;GO:0050658//RNA transport;GO:0015758//glucose transport	gi|16758978|ref|NP_446068.1|/0/nuclear pore complex protein Nup88 [Rattus norvegicus]
ENSRNOG00000018487	Slc3a2	-2.79751	0.865592	K06519|1|0.0|911|rno:50567|solute carrier family 3, member 2	GO:0031224//intrinsic to membrane;GO:0044459//plasma membrane part;GO:0048770	GO:0015081//sodium ion transmembrane transporter activity;GO:0015171//amino acid transmembrane transporter activity;GO:0043167//ion binding	GO:0015801//aromatic amino acid transport;GO:0015820//leucine transport;GO:0044238//primary metabolic process;GO:0040007//growth;GO:0002376//immune system process;GO:0006807//nitrogen compound metabolic process;GO:0007599//hemostasis;GO:0070838//divalent metal ion transport	gi|402743472|ref|NP_062156.2|/0/4F2 cell-surface antigen heavy chain isoform 1 [Rattus norvegicus]
ENSRNOG00000014915	Gsr	2.20216	0.842591	K00383|1|0.0|830|mmu:14782|glutathione reductase (NADPH) [EC:1.8.1.7]	GO:0043231//intracellular membrane-bounded organelle;GO:0009986//cell surface;GO:0044444//cytoplasmic part	GO:0015038//glutathione disulfide oxidoreductase activity;GO:0042277//peptide binding;GO:0042802//identical protein binding;GO:0000166//nucleotide binding;GO:0050662//coenzyme binding	GO:0006790//sulfur compound metabolic process;GO:0019725//cellular homeostasis;GO:0048232//male gamete generation	gi|50402124|sp|P70619.2|GSHR_RAT/0/RecName: Full=Glutathione reductase; Short=GR; Short=GRase
ENSRNOG00000020544	Sdr39u1	-2.31513	0.830764	K07071|1|4e-159|561|rno:361044|	-	GO:0048037//cofactor binding	GO:0008152//metabolic process	gi|157821511|ref|NP_001101848.1|/2.90778e-158/epimerase family protein SDR39U1 [Rattus norvegicus]
ENSRNOG00000019773	Egln1	1.74558	0.826614	K09592|1|2e-160|566|rno:308913|hypoxia-inducible factor prolyl hydroxylase [EC:1.14.11.-]	GO:0044444//cytoplasmic part	GO:0019842//vitamin binding;GO:0046914//transition metal ion binding;GO:0016706//oxidoreductase activity, acting on paired donors, with incorporation or reduction of molecular oxygen, 2-oxoglutarate as one donor, and incorporation of one atom each of oxygen into both donors;GO:0016701//oxidoreductase activity, acting on single donors with incorporation of molecular oxygen	GO:0033483;GO:0043392//negative regulation of DNA binding;GO:0008152//metabolic process;GO:0006950//response to stress	gi|392355113|ref|XP_002728657.2|/1.47217e-159/PREDICTED: egl nine homolog 1, partial [Rattus norvegicus]
ENSRNOG00000031721	Dnajc30	-2.07273	0.814092	K09524|1|4e-12|71.6|aml:100465981|DnaJ homolog subfamily C member 4;K09504|2|2e-11|69.7|spu:581863|DnaJ homolog subfamily A member 3	-	GO:0005515//protein binding	GO:0044267//cellular protein metabolic process	gi|157816981|ref|NP_001102494.1|/1.94019e-96/dnaJ homolog subfamily C member 30 [Rattus norvegicus]
ENSRNOG00000021678	Alkbh3	2.04502	0.84278	K10860|1|3e-168|592|rno:362169|alpha-ketoglutarate-dependent dioxygenase alkB homolog 3 [EC:1.14.11.-]	GO:0031981//nuclear lumen	GO:0019842//vitamin binding;GO:0016706//oxidoreductase activity, acting on paired donors, with incorporation or reduction of molecular oxygen, 2-oxoglutarate as one donor, and incorporation of one atom each of oxygen into both donors;GO:0016701//oxidoreductase activity, acting on single donors with incorporation of molecular oxygen;GO:0003677//DNA binding;GO:0004518//nuclease activity;GO:0005506/…	GO:0006281//DNA repair;GO:0035511//oxidative DNA demethylation	gi|62079085|ref|NP_001014202.1|/2.13671e-167/alpha-ketoglutarate-dependent dioxygenase alkB homolog 3 [Rattus norvegicus]
ENSRNOG00000027797	Nit2	-2.07076	0.846224	K13566|1|2e-158|558|rno:288174|omega-amidase [EC:3.5.1.3]	GO:0043231//intracellular membrane-bounded organelle	GO:0016811//hydrolase activity, acting on carbon-nitrogen (but not peptide) bonds, in linear amides	GO:0008152//metabolic process	gi|77628000|ref|NP_001029298.1|/1.49086e-157/omega-amidase NIT2 [Rattus norvegicus]
ENSRNOG00000019500	Cyp1a1	-2.16664	0.811648	K07408|1|0.0|1065|rno:24296|cytochrome P450, family 1, subfamily A, polypeptide 1 [EC:1.14.14.1]	GO:0031090//organelle membrane;GO:0005740//mitochondrial envelope	GO:0005515//protein binding;GO:0033695;GO:0005506//iron ion binding;GO:0016709//oxidoreductase activity, acting on paired donors, with incorporation or reduction of molecular oxygen, NADH or NADPH as one donor, and incorporation of one atom of oxygen;GO:0016712//oxidoreductase activity, acting on paired donors, with incorporation or reduction of molecular oxygen, reduced flavin or flavoprotein as…	GO:0018894//dibenzo-p-dioxin metabolic process;GO:0015980//energy derivation by oxidation of organic compounds;GO:0008202//steroid metabolic process;GO:0010467//gene expression;GO:0042743//hydrogen peroxide metabolic process;GO:0010039//response to iron ion;GO:0009698//phenylpropanoid metabolic process;GO:0017144//drug metabolic process;GO:0006730//one-carbon metabolic process;GO:0001654//eye dev…	gi|117142|sp|P00185.1|CP1A1_RAT/0/RecName: Full=Cytochrome P450 1A1; Short=CYP1A1; AltName: Full=CYPIA1; AltName: Full=Cytochrome P450-C; AltName: Full=Cytochrome P450MT2; Contains: RecName: Full=Cytochrome P450MT2A; Contains: RecName: Full=Cytochrome P450MT2B
ENSRNOG00000019525	Hspa9	1.90099	0.849658	K04043|1|0.0|1184|rno:291671|molecular chaperone DnaK	GO:0005759//mitochondrial matrix	GO:0005515//protein binding;GO:0032559	GO:0044267//cellular protein metabolic process;GO:0006605//protein targeting;GO:0043066//negative regulation of apoptotic process	gi|410110929|ref|NP_001094128.2|/0/stress-70 protein, mitochondrial [Rattus norvegicus]
ENSRNOG00000018598	Ankrd1	3.74239	0.906203	K15504|1|7e-22|106|bta:521057|serine/threonine-protein phosphatase 6 regulatory ankyrin repeat subunit C	GO:0043231//intracellular membrane-bounded organelle;GO:0043234//protein complex;GO:0030017//sarcomere	GO:0003712//transcription cofactor activity;GO:0003676//nucleic acid binding	GO:0006629//lipid metabolic process;GO:0006355//regulation of transcription, DNA-dependent;GO:0023052//signaling;GO:0006950//response to stress	gi|81901720|sp|Q8R560.1|ANKR1_RAT/3.54385e-161/RecName: Full=Ankyrin repeat domain-containing protein 1; AltName: Full=Cardiac adriamycin-responsive protein; AltName: Full=Cardiac ankyrin repeat protein
ENSRNOG00000009421	Ivd	4.22019	0.920579	K00253|1|0.0|847|rno:24513|isovaleryl-CoA dehydrogenase [EC:1.3.8.4]	GO:0005740//mitochondrial envelope	GO:0003995//acyl-CoA dehydrogenase activity;GO:0050662//coenzyme binding	GO:0006551//leucine metabolic process;GO:0051259//protein oligomerization;GO:0006635//fatty acid beta-oxidation;GO:0009063//cellular amino acid catabolic process	gi|6981112|ref|NP_036724.1|/0/isovaleryl-CoA dehydrogenase, mitochondrial precursor [Rattus norvegicus]
ENSRNOG00000027891	Dhrs11	2.15107	0.833449	K11147|1|2e-24|114|cqu:CpipJ_CPIJ011391|dehydrogenase/reductase SDR family member 4 [EC:1.1.-.-];K16066|2|2e-23|110|api:100162592|malonic semialdehyde reductase [EC:1.1.1.-]	-	GO:0003824//catalytic activity	GO:0008152//metabolic process	gi|347800650|ref|NP_001014141.2|/1.42494e-146/dehydrogenase/reductase (SDR family) member 11 [Rattus norvegicus]
ENSRNOG00000005686	Suclg2	-2.08773	0.850247	K01900|1|0.0|783|rno:362404|succinyl-CoA synthetase beta subunit [EC:6.2.1.4 6.2.1.5]	GO:0030062//mitochondrial tricarboxylic acid cycle enzyme complex	GO:0004774//succinate-CoA ligase activity;GO:0043169//cation binding;GO:0032561//guanyl ribonucleotide binding;GO:0046983//protein dimerization activity;GO:0032559	GO:0043648//dicarboxylic acid metabolic process;GO:0009060//aerobic respiration;GO:0006732//coenzyme metabolic process	gi|189491689|ref|NP_001094220.1|/0/succinyl-CoA ligase [GDP-forming] subunit beta, mitochondrial [Rattus norvegicus]
ENSRNOG00000017286	Ephx2	2.44185	0.837009	K08726|1|0.0|1087|rno:65030|soluble epoxide hydrolase [EC:3.3.2.10]	GO:0031981//nuclear lumen;GO:0042579//microbody;GO:0005924//cell-substrate adherens junction	GO:0046872//metal ion binding;GO:0042802//identical protein binding;GO:0016791//phosphatase activity;GO:0016803	GO:0007600//sensory perception;GO:0002538;GO:0006796//phosphate-containing compound metabolic process;GO:0008217//regulation of blood pressure;GO:0006875//cellular metal ion homeostasis;GO:0042221//response to chemical stimulus;GO:0006725//cellular aromatic compound metabolic process;GO:0001676//long-chain fatty acid metabolic process;GO:0042311//vasodilation	gi|55716049|gb|AAH85732.1|/0/Epoxide hydrolase 2, cytoplasmic [Rattus norvegicus]
ENSRNOG00000022586	Cdk9	2.58559	0.845803	K02211|1|0.0|755|rno:362110|cyclin-dependent kinase 9 [EC:2.7.11.22 2.7.11.23]	GO:0008023//transcription elongation factor complex	GO:0003723//RNA binding;GO:0004674//protein serine/threonine kinase activity;GO:0043565//sequence-specific DNA binding;GO:0032559	GO:0006796//phosphate-containing compound metabolic process;GO:0006352//DNA-dependent transcription, initiation;GO:0045935;GO:0006354//DNA-dependent transcription, elongation;GO:0006464//cellular protein modification process	gi|440894652|gb|ELR47052.1|/0/Cell division protein kinase 9, partial [Bos grunniens mutus]
ENSRNOG00000002848	Maoa	-2.74166	0.872649	K00274|1|0.0|1052|rno:29253|monoamine oxidase [EC:1.4.3.4]	GO:0031224//intrinsic to membrane;GO:0031966//mitochondrial membrane	GO:0043176//amine binding;GO:0050662//coenzyme binding;GO:0016641//oxidoreductase activity, acting on the CH-NH2 group of donors, oxygen as acceptor	GO:0050896//response to stimulus;GO:0042133//neurotransmitter metabolic process;GO:0006586;GO:0042417//dopamine metabolic process	gi|48425080|pdb|1O5W|A/0/Chain A, The Structure Basis Of Specific Recognitions For Substrates And Inhibitors Of Rat Monoamine Oxidase A
ENSRNOG00000019302	Stx4	-2.07578	0.841053	K13502|1|4e-152|537|rno:81803|syntaxin 4	GO:0031224//intrinsic to membrane;GO:0043234//protein complex;GO:0044459//plasma membrane part;GO:0030141//secretory granule;GO:0044431//Golgi apparatus part	GO:0008092//cytoskeletal protein binding;GO:0005083//small GTPase regulator activity	GO:0019222//regulation of metabolic process;GO:0016044//cellular membrane organization;GO:0048193//Golgi vesicle transport;GO:0065003;GO:0006904//vesicle docking involved in exocytosis;GO:0015031//protein transport	gi|149067672|gb|EDM17224.1|/1.45905e-151/syntaxin 4A (placental), isoform CRA_a [Rattus norvegicus]
ENSRNOG00000027707	Exd2	2.65441	0.81109	K10900|1|5e-14|81.3|dre:569495|werner syndrome ATP-dependent helicase [EC:3.6.4.12]	GO:0044464//cell part	GO:0005488//binding;GO:0004527//exonuclease activity	GO:0034641//cellular nitrogen compound metabolic process	gi|157823431|ref|NP_001102185.1|/0/exonuclease 3'-5' domain-containing protein 2 [Rattus norvegicus]
ENSRNOG00000014204	Pacsin3	-2.87707	0.865645	K10408|1|5e-78|292|tca:664324|dynein heavy chain, axonemal;K12804|3|2e-18|94.7|dre:571331|proline-serine-threonine phosphatase interacting protein 1	GO:0044431//Golgi apparatus part;GO:0016020//membrane	GO:0016772//transferase activity, transferring phosphorus-containing groups;GO:0005515//protein binding	GO:0006796//phosphate-containing compound metabolic process;GO:0031331;GO:0030100//regulation of endocytosis	gi|148695609|gb|EDL27556.1|/0/protein kinase C and casein kinase substrate in neurons 3, isoform CRA_b [Mus musculus]
ENSRNOG00000014757	-	-3.34068	0.869026	K10226|1|5e-09|59.7|tgu:100222881|fatty acid desaturase 2 (delta-6 desaturase) [EC:1.14.19.-];K04257|2|7e-09|59.3|mdo:100024996|olfactory receptor;K10224|5|4e-08|56.6|xtr:100489232|fatty acid desaturase 1 (delta-5 desaturase) [EC:1.14.19.-]	GO:0031224//intrinsic to membrane;GO:0031966//mitochondrial membrane	GO:0016616//oxidoreductase activity, acting on the CH-OH group of donors, NAD or NADP as acceptor;GO:0016215;GO:0005515//protein binding;GO:0005506//iron ion binding	GO:0010038//response to metal ion;GO:0032787//monocarboxylic acid metabolic process;GO:0006091//generation of precursor metabolites and energy;GO:0051234//establishment of localization	gi|2257955|gb|AAB67609.1|/1.4486e-39/cytochrome b5 [Rattus norvegicus]
ENSRNOG00000015150	Spg7	-2.51737	0.833639	K09552|1|0.0|1335|rno:353231|spastic paraplegia 7 [EC:3.4.24.-]	GO:0031224//intrinsic to membrane;GO:0005740//mitochondrial envelope	GO:0004175//endopeptidase activity;GO:0046914//transition metal ion binding;GO:0005515//protein binding;GO:0016462//pyrophosphatase activity;GO:0032559	GO:0048731;GO:0006996//organelle organization;GO:0008088//axon cargo transport;GO:0019538//protein metabolic process;GO:0007155//cell adhesion;GO:0009057//macromolecule catabolic process	gi|31077102|ref|NP_852053.1|/0/paraplegin [Rattus norvegicus]
ENSRNOG00000013409	Gclm	2.47479	0.856061	K11205|1|8e-146|517|rno:29739|glutamate--cysteine ligase regulatory subunit	GO:0043234//protein complex;GO:0044444//cytoplasmic part	GO:0016881//acid-amino acid ligase activity;GO:0019899//enzyme binding;GO:0046983//protein dimerization activity	GO:0003254//regulation of membrane depolarization;GO:0009064//glutamine family amino acid metabolic process;GO:0006749//glutathione metabolic process;GO:0035227;GO:0000096//sulfur amino acid metabolic process;GO:0042221//response to chemical stimulus;GO:0003018;GO:0043066//negative regulation of apoptotic process;GO:0006950//response to stress	gi|8393446|ref|NP_059001.1|/6.41466e-145/glutamate--cysteine ligase regulatory subunit [Rattus norvegicus]
ENSRNOG00000043189	Trub2	-2.48302	0.837957	K03177|1|6e-100|365|xtr:496499|tRNA pseudouridine55 synthase [EC:5.4.99.25]	-	GO:0003676//nucleic acid binding;GO:0016866//intramolecular transferase activity	GO:0010467//gene expression;GO:0009451//RNA modification;GO:0006399//tRNA metabolic process	gi|62079245|ref|NP_001014279.1|/0/probable tRNA pseudouridine synthase 2 [Rattus norvegicus]
ENSRNOG00000004477	Ublcp1	-2.45283	0.811353	K01090|1|5e-166|585|rno:360514|protein phosphatase [EC:3.1.3.16]	GO:0043231//intracellular membrane-bounded organelle	GO:0016791//phosphatase activity	GO:0006796//phosphate-containing compound metabolic process	gi|62078971|ref|NP_001014139.1|/3.8527e-165/ubiquitin-like domain-containing CTD phosphatase 1 [Rattus norvegicus]
ENSRNOG00000000221	Abhd5	-1.96563	0.813628	K13699|1|0.0|681|rno:316122|abhydrolase domain-containing protein 5 [EC:2.3.1.51]	GO:0044444//cytoplasmic part	GO:0005488//binding;GO:0016411//acylglycerol O-acyltransferase activity;GO:0071617//lysophospholipid acyltransferase activity;GO:0004091//carboxylesterase activity	GO:0006644//phospholipid metabolic process;GO:0048869//cellular developmental process;GO:0010896//regulation of triglyceride catabolic process;GO:0051004;GO:0032787//monocarboxylic acid metabolic process;GO:0046394;GO:0010888//negative regulation of lipid storage	gi|117558822|gb|AAI27471.1|/0/Abhd5 protein [Rattus norvegicus]
ENSRNOG00000002896	Prdx6	-2.65082	0.870342	K11188|1|9e-128|457|rno:94167|peroxiredoxin 6, 1-Cys peroxiredoxin [EC:1.11.1.7 1.11.1.15 3.1.1.-]	GO:0000323//lytic vacuole;GO:0031410//cytoplasmic vesicle	GO:0005488//binding;GO:0016705//oxidoreductase activity, acting on paired donors, with incorporation or reduction of molecular oxygen;GO:0004601//peroxidase activity;GO:0004091//carboxylesterase activity	GO:0006979//response to oxidative stress;GO:0006644//phospholipid metabolic process;GO:0019725//cellular homeostasis;GO:0042743//hydrogen peroxide metabolic process;GO:0030031//cell projection assembly	gi|16758348|ref|NP_446028.1|/7.39657e-127/peroxiredoxin-6 [Rattus norvegicus]
ENSRNOG00000020812	Gys1	-2.56249	0.843212	K00693|1|0.0|1314|rno:690987|glycogen(starch) synthase [EC:2.4.1.11]	GO:0044444//cytoplasmic part	GO:0048029//monosaccharide binding;GO:0035251//UDP-glucosyltransferase activity	GO:0048513//organ development;GO:0005977//glycogen metabolic process;GO:0019318//hexose metabolic process	gi|157823922|ref|NP_001103085.1|/0/glycogen [starch] synthase, muscle [Rattus norvegicus]
ENSRNOG00000014050	Ptges2	-2.22021	0.83089	K05309|1|0.0|745|rno:311865|microsomal prostaglandin-E synthase 2 [EC:5.3.99.3]	GO:0031224//intrinsic to membrane;GO:0043231//intracellular membrane-bounded organelle;GO:0044444//cytoplasmic part;GO:0012505//endomembrane system	GO:0003676//nucleic acid binding;GO:0016860//intramolecular oxidoreductase activity;GO:0015036//disulfide oxidoreductase activity	GO:0006810//transport;GO:0006693//prostaglandin metabolic process;GO:0019725//cellular homeostasis;GO:0006351//transcription, DNA-dependent	gi|157822395|ref|NP_001101302.1|/0/prostaglandin E synthase 2 [Rattus norvegicus]
ENSRNOG00000016940	Ppp2r2d	2.02946	0.824708	K04354|1|0.0|652|rno:246255|protein phosphatase 2 (formerly 2A), regulatory subunit B	GO:0008287//protein serine/threonine phosphatase complex;GO:0044444//cytoplasmic part;GO:0031981//nuclear lumen;GO:0008287//protein serine/threonine phosphatase complex;GO:0044444//cytoplasmic part;GO:0031981//nuclear lumen	GO:0016791//phosphatase activity;GO:0019888//protein phosphatase regulator activity;GO:0016791//phosphatase activity;GO:0019888//protein phosphatase regulator activity	GO:0019222//regulation of metabolic process;GO:0023052//signaling;GO:0000087//M phase of mitotic cell cycle;GO:0019222//regulation of metabolic process;GO:0023052//signaling;GO:0000087//M phase of mitotic cell cycle	gi|148747146|ref|NP_653347.2|/0/serine/threonine-protein phosphatase 2A 55 kDa regulatory subunit B delta isoform [Rattus norvegicus]
ENSRNOG00000049920	Psma2	1.58424	0.808352	K02726|1|2e-130|468|rno:29669|20S proteasome subunit alpha 2 [EC:3.4.25.1]	GO:0043231//intracellular membrane-bounded organelle;GO:0005839//proteasome core complex	GO:0004175//endopeptidase activity;GO:0005488//binding	GO:0043161//proteasomal ubiquitin-dependent protein catabolic process;GO:0051707//response to other organism;GO:0051320//S phase;GO:0007050//cell cycle arrest;GO:0016070//RNA metabolic process;GO:0051439//regulation of ubiquitin-protein ligase activity involved in mitotic cell cycle;GO:0006520//cellular amino acid metabolic process;GO:0006915//apoptotic process;GO:0030330//DNA damage response, si…	gi|8394063|ref|NP_058975.1|/1.23723e-129/proteasome subunit alpha type-2 [Rattus norvegicus]
ENSRNOG00000003117	Psmd12	-2.0123	0.843707	K03035|1|0.0|890|rno:287772|26S proteasome regulatory subunit N5	GO:0022624//proteasome accessory complex	GO:0005488//binding	GO:0043161//proteasomal ubiquitin-dependent protein catabolic process;GO:0051320//S phase;GO:0007050//cell cycle arrest;GO:0016070//RNA metabolic process;GO:0051439//regulation of ubiquitin-protein ligase activity involved in mitotic cell cycle;GO:0006520//cellular amino acid metabolic process;GO:0006915//apoptotic process;GO:0030330//DNA damage response, signal transduction by p53 class mediator	gi|54400716|ref|NP_001005875.1|/0/26S proteasome non-ATPase regulatory subunit 12 [Rattus norvegicus]
ENSRNOG00000009565	Pdk4	-2.59165	0.868647	K00898|1|0.0|822|rno:89813|pyruvate dehydrogenase kinase [EC:2.7.11.2]	GO:0019866//organelle inner membrane;GO:0044429//mitochondrial part	GO:0004673//protein histidine kinase activity;GO:0032559	GO:0006468//protein phosphorylation;GO:0019318//hexose metabolic process;GO:0006086//acetyl-CoA biosynthetic process from pyruvate;GO:0022611;GO:0007165//signal transduction	gi|149064949|gb|EDM15025.1|/0/pyruvate dehydrogenase kinase, isoenzyme 4 [Rattus norvegicus]
ENSRNOG00000007102	Acss1	1.9033	0.835724	K01895|1|0.0|1321|rno:296259|acetyl-CoA synthetase [EC:6.2.1.1]	GO:0044429//mitochondrial part	GO:0016405//CoA-ligase activity;GO:0032559	GO:0019541//propionate metabolic process;GO:0006084//acetyl-CoA metabolic process;GO:0006067//ethanol metabolic process;GO:0006083//acetate metabolic process	gi|157818027|ref|NP_001099994.1|/0/acetyl-coenzyme A synthetase 2-like, mitochondrial [Rattus norvegicus]
ENSRNOG00000008116	Ppap2b	2.42978	0.821811	K01080|1|5e-162|572|rno:192270|phosphatidate phosphatase [EC:3.1.3.4]	GO:0043231//intracellular membrane-bounded organelle;GO:0070161;GO:0031224//intrinsic to membrane;GO:0031090//organelle membrane	GO:0005102//receptor binding;GO:0016791//phosphatase activity	GO:0001934//positive regulation of protein phosphorylation;GO:0060070//canonical Wnt receptor signaling pathway;GO:0007369//gastrulation;GO:0031647//regulation of protein stability;GO:0001944//vasculature development;GO:0016337//cell-cell adhesion;GO:0019637//organophosphate metabolic process;GO:0006643//membrane lipid metabolic process;GO:0007276//gamete generation;GO:0043388//positive regulatio…	gi|48675867|ref|NP_620260.2|/4.0671e-161/lipid phosphate phosphohydrolase 3 [Rattus norvegicus]
ENSRNOG00000028298	-	-3.34068	0.862938	K10226|1|4e-07|53.5|xla:399058|fatty acid desaturase 2 (delta-6 desaturase) [EC:1.14.19.-]	GO:0019866//organelle inner membrane;GO:0031966//mitochondrial membrane	GO:0046872//metal ion binding;GO:0009055//electron carrier activity;GO:0030234//enzyme regulator activity	GO:0019222//regulation of metabolic process	gi|354493206|ref|XP_003508734.1|/1.11495e-44/PREDICTED: cytochrome b5 type B-like isoform 2 [Cricetulus griseus]
ENSRNOG00000007967	Sdhb	3.53443	0.898125	K00235|1|2e-151|535|rno:298596|succinate dehydrogenase (ubiquinone) iron-sulfur subunit [EC:1.3.5.1]	GO:0005746//mitochondrial respiratory chain	GO:0048038//quinone binding;GO:0043169//cation binding;GO:0051536//iron-sulfur cluster binding;GO:0000104//succinate dehydrogenase activity	GO:0022900//electron transport chain;GO:0043648//dicarboxylic acid metabolic process;GO:0009060//aerobic respiration;GO:0051234//establishment of localization	gi|209915614|ref|NP_001094009.1|/1.61036e-150/succinate dehydrogenase [ubiquinone] iron-sulfur subunit, mitochondrial precursor [Rattus norvegicus]
ENSRNOG00000037443	Pgam5	2.03808	0.832027	K15637|1|1e-155|550|rno:288731|serine/threonine-protein phosphatase PGAM5 [EC:3.1.3.16]	GO:0031224//intrinsic to membrane;GO:0031966//mitochondrial membrane	GO:0016791//phosphatase activity	GO:0006796//phosphate-containing compound metabolic process	gi|149063736|gb|EDM14059.1|/2.0006e-155/rCG21137 [Rattus norvegicus]
ENSRNOG00000046891	Hk1	2.73016	0.862328	K00844|1|0.0|1335|bta:280817|hexokinase [EC:2.7.1.1]	GO:0031966//mitochondrial membrane	GO:0016773//phosphotransferase activity, alcohol group as acceptor;GO:0032559	GO:0006796//phosphate-containing compound metabolic process;GO:0006007//glucose catabolic process	gi|149038696|gb|EDL92985.1|/0/hexokinase 1, isoform CRA_f [Rattus norvegicus]
ENSRNOG00000020624	Acadsb	2.31948	0.831406	K09478|1|0.0|746|rno:25618|short/branched chain acyl-CoA dehydrogenase [EC:1.3.99.12]	GO:0044429//mitochondrial part	GO:0003995//acyl-CoA dehydrogenase activity;GO:0050662//coenzyme binding	GO:0009062//fatty acid catabolic process;GO:0006732//coenzyme metabolic process;GO:0009063//cellular amino acid catabolic process	gi|6978433|ref|NP_037216.1|/0/short/branched chain specific acyl-CoA dehydrogenase, mitochondrial [Rattus norvegicus]
ENSRNOG00000028292	Gart	2.40222	0.820242	K11787|1|0.0|1961|rno:288259|phosphoribosylamine--glycine ligase / phosphoribosylglycinamide formyltransferase / phosphoribosylformylglycinamidine cyclo-ligase [EC:6.3.4.13 2.1.2.2 6.3.3.1]	GO:0044444//cytoplasmic part	GO:0043169//cation binding;GO:0016882//cyclo-ligase activity;GO:0016742//hydroxymethyl-, formyl- and related transferase activity;GO:0032559	GO:0006144//purine nucleobase metabolic process;GO:0048856//anatomical structure development;GO:0006188//IMP biosynthetic process;GO:0006730//one-carbon metabolic process;GO:0042221//response to chemical stimulus	gi|197927388|ref|NP_001011899.2|/0/trifunctional purine biosynthetic protein adenosine-3 [Rattus norvegicus]
ENSRNOG00000010277	Idh3a	2.48947	0.862496	K00030|1|0.0|734|rno:114096|isocitrate dehydrogenase (NAD+) [EC:1.1.1.41]	GO:0030062//mitochondrial tricarboxylic acid cycle enzyme complex	GO:0046872//metal ion binding;GO:0004448//isocitrate dehydrogenase activity;GO:0000166//nucleotide binding	GO:0043648//dicarboxylic acid metabolic process;GO:0019674//NAD metabolic process;GO:0009060//aerobic respiration	gi|149041699|gb|EDL95540.1|/0/isocitrate dehydrogenase 3 (NAD+) alpha, isoform CRA_a [Rattus norvegicus]
ENSRNOG00000012325	Adk	-2.89646	0.862391	K00856|1|0.0|726|rno:25368|adenosine kinase [EC:2.7.1.20]	GO:0043231//intracellular membrane-bounded organelle;GO:0044444//cytoplasmic part	GO:0032559;GO:0043169//cation binding;GO:0019206//nucleoside kinase activity	GO:0009168//purine ribonucleoside monophosphate biosynthetic process;GO:0046128;GO:0006796//phosphate-containing compound metabolic process;GO:0009216//purine deoxyribonucleoside triphosphate biosynthetic process;GO:0009112;GO:0043101//purine-containing compound salvage;GO:0042098//T cell proliferation	gi|52345435|ref|NP_037027.2|/0/adenosine kinase [Rattus norvegicus]
ENSRNOG00000006632	Rps6ka3	-1.95899	0.817704	K04373|1|0.0|1429|rno:501560|p90 ribosomal S6 kinase [EC:2.7.11.1]	GO:0031981//nuclear lumen;GO:0044444//cytoplasmic part;GO:0030529//ribonucleoprotein complex	GO:0004672//protein kinase activity;GO:0046872//metal ion binding;GO:0032559;GO:0004869//cysteine-type endopeptidase inhibitor activity	GO:0007267//cell-cell signaling;GO:0006796//phosphate-containing compound metabolic process;GO:0002224//toll-like receptor signaling pathway;GO:0007169//transmembrane receptor protein tyrosine kinase signaling pathway;GO:0006935//chemotaxis;GO:0006464//cellular protein modification process;GO:0007399//nervous system development;GO:0010466//negative regulation of peptidase activity;GO:0000165//MAP…	gi|300795637|ref|NP_001178933.1|/0/ribosomal protein S6 kinase alpha-3 [Rattus norvegicus]
ENSRNOG00000001269	PPP1CC	2.61955	0.859737	K06269|1|0.0|697|ptr:743656|protein phosphatase 1, catalytic subunit [EC:3.1.3.16]	GO:0008287//protein serine/threonine phosphatase complex;GO:0031966//mitochondrial membrane;GO:0032155;GO:0000776//kinetochore;GO:0030425//dendrite;GO:0035097//histone methyltransferase complex;GO:0016604//nuclear body	GO:0004721//phosphoprotein phosphatase activity;GO:0043169//cation binding;GO:0019900//kinase binding	GO:0006073//cellular glucan metabolic process;GO:0006796//phosphate-containing compound metabolic process;GO:0007067//mitosis;GO:0006464//cellular protein modification process;GO:0032386//regulation of intracellular transport;GO:0006641//triglyceride metabolic process	gi|401709959|ref|NP_001257912.1|/0/serine/threonine-protein phosphatase PP1-gamma catalytic subunit isoform 2 [Rattus norvegicus]
ENSRNOG00000016275	Ttr	1.83548	0.8002	K07127|1|1e-17|90.1|spu:589020|5-hydroxyisourate hydrolase [EC:3.5.2.17]	GO:0044421//extracellular region part	GO:0005102//receptor binding	GO:0051234//establishment of localization;GO:0006575//cellular modified amino acid metabolic process	gi|333033763|ref|NP_036813.2|/9.23568e-71/transthyretin precursor [Rattus norvegicus]
ENSRNOG00000013236	Samd8	-2.17022	0.802433	K04714|1|7e-87|322|bfo:BRAFLDRAFT_104157|shingomyelin synthase [EC:2.7.8.27]	GO:0044464//cell part	-	GO:0006684//sphingomyelin metabolic process	gi|58865648|ref|NP_001012040.1|/0/sphingomyelin synthase-related protein 1 [Rattus norvegicus]
ENSRNOG00000003520	Prdx2	-2.24901	0.860737	K03386|1|1e-112|406|rno:29338|peroxiredoxin (alkyl hydroperoxide reductase subunit C) [EC:1.11.1.15]	GO:0043231//intracellular membrane-bounded organelle;GO:0044444//cytoplasmic part	GO:0016705//oxidoreductase activity, acting on paired donors, with incorporation or reduction of molecular oxygen;GO:0004601//peroxidase activity;GO:0005488//binding	GO:0002832;GO:0042743//hydrogen peroxide metabolic process;GO:0043433//negative regulation of sequence-specific DNA binding transcription factor activity;GO:0007596//blood coagulation;GO:0019725//cellular homeostasis;GO:0002532//production of molecular mediator involved in inflammatory response;GO:0045580//regulation of T cell differentiation;GO:0006801//superoxide metabolic process;GO:0002237//r…	gi|34849738|gb|AAH58481.1|/3.5919e-112/Peroxiredoxin 2 [Rattus norvegicus]
ENSRNOG00000004027	Aldh9a1	2.47968	0.854418	K00149|1|0.0|1006|rno:64040|aldehyde dehydrogenase family 9 member A1 [EC:1.2.1.47 1.2.1.3]	GO:0043231//intracellular membrane-bounded organelle;GO:0005856//cytoskeleton;GO:0044444//cytoplasmic part;GO:0016020//membrane	GO:0004030//aldehyde dehydrogenase [NAD(P)+] activity;GO:0042802//identical protein binding;GO:0000166//nucleotide binding	GO:0042133//neurotransmitter metabolic process;GO:0006520//cellular amino acid metabolic process;GO:0048513//organ development;GO:0006578//amino-acid betaine biosynthetic process	gi|149058126|gb|EDM09283.1|/0/aldehyde dehydrogenase family 9, subfamily A1 [Rattus norvegicus]
ENSRNOG00000011189	Acy1	-2.61155	0.837557	K14677|1|0.0|803|rno:300981|aminoacylase [EC:3.5.1.14]	GO:0044444//cytoplasmic part	GO:0016811//hydrolase activity, acting on carbon-nitrogen (but not peptide) bonds, in linear amides;GO:0043169//cation binding;GO:0070011	GO:0009057//macromolecule catabolic process;GO:0019538//protein metabolic process;GO:0019752//carboxylic acid metabolic process	gi|81884653|sp|Q6AYS7.1|ACY1A_RAT/0/RecName: Full=Aminoacylase-1A; Short=ACY-1A; AltName: Full=ACY IA; AltName: Full=N-acyl-L-amino-acid amidohydrolase
ENSRNOG00000018289	RGD1560648	-2.34407	0.859221	K05687|1|2e-101|369|rno:117287|protein DJ-1	GO:0043005//neuron projection;GO:0043231//intracellular membrane-bounded organelle;GO:0044444//cytoplasmic part	GO:0016787//hydrolase activity;GO:0016705//oxidoreductase activity, acting on paired donors, with incorporation or reduction of molecular oxygen;GO:0042802//identical protein binding;GO:0016209//antioxidant activity;GO:0003723//RNA binding	GO:0007626//locomotory behavior;GO:0032411//positive regulation of transporter activity;GO:0015872//dopamine transport;GO:0031647//regulation of protein stability;GO:0034614//cellular response to reactive oxygen species;GO:0009566//fertilization;GO:0043393//regulation of protein binding;GO:0043523//regulation of neuron apoptotic process;GO:0006996//organelle organization;GO:0033143//regulation of…	gi|16924002|ref|NP_476484.1|/1.39162e-100/protein DJ-1 isoform 2 [Rattus norvegicus]
ENSRNOG00000003139	Smc1a	-2.37306	0.814818	K06636|1|0.0|1991|cfa:480928|structural maintenance of chromosome 1	GO:0000776//kinetochore;GO:0000228//nuclear chromosome;GO:0008278//cohesin complex	GO:0046983//protein dimerization activity;GO:0032559;GO:0003774//motor activity	GO:0006259//DNA metabolic process;GO:0007050//cell cycle arrest;GO:0009628//response to abiotic stimulus;GO:0000070//mitotic sister chromatid segregation;GO:0000377;GO:0033554//cellular response to stress;GO:0010948;GO:0035556//intracellular signal transduction	gi|348553156|ref|XP_003462393.1|/0/PREDICTED: LOW QUALITY PROTEIN: structural maintenance of chromosomes protein 1A-like [Cavia porcellus]
ENSRNOG00000004245	Mgst3	-1.23823	0.810574	K00799|1|5e-86|316|rno:289197|glutathione S-transferase [EC:2.5.1.18]	GO:0031224//intrinsic to membrane;GO:0043231//intracellular membrane-bounded organelle;GO:0031090//organelle membrane	GO:0004601//peroxidase activity;GO:0016765//transferase activity, transferring alkyl or aryl (other than methyl) groups	GO:0002538;GO:0009719;GO:0023052//signaling;GO:0006691//leukotriene metabolic process	gi|300797728|ref|NP_001178523.1|/3.30773e-85/microsomal glutathione S-transferase 3 [Rattus norvegicus]
ENSRNOG00000031485	Dpp3	-2.47721	0.814165	K01277|1|0.0|1478|rno:114591|dipeptidyl-peptidase III [EC:3.4.14.4]	GO:0044424//intracellular part	GO:0046914//transition metal ion binding;GO:0008238//exopeptidase activity	GO:0019538//protein metabolic process	gi|16758578|ref|NP_446200.1|/0/dipeptidyl peptidase 3 [Rattus norvegicus]
ENSRNOG00000009882	PPP3CA	-2.16272	0.83862	K04348|1|0.0|1011|pon:100174530|protein phosphatase 3, catalytic subunit [EC:3.1.3.16]	GO:0031981//nuclear lumen;GO:0008287//protein serine/threonine phosphatase complex;GO:0031674//I band	GO:0046983//protein dimerization activity;GO:0046872//metal ion binding;GO:0004722//protein serine/threonine phosphatase activity	GO:0014075//response to amine stimulus;GO:0006357//regulation of transcription from RNA polymerase II promoter;GO:0006605//protein targeting;GO:0048747//muscle fiber development;GO:0006796//phosphate-containing compound metabolic process;GO:0050796//regulation of insulin secretion;GO:0051899//membrane depolarization;GO:0022402//cell cycle process;GO:0070838//divalent metal ion transport;GO:000646…	gi|4584820|emb|CAA40398.2|/0/serine/threonine specific protein phosphatase [Rattus norvegicus]
ENSRNOG00000016244	Mical2	-1.98758	0.808794	K06115|1|5e-21|104|mmu:20741|spectrin beta	GO:0043232	GO:0046914//transition metal ion binding;GO:0016491//oxidoreductase activity	GO:0008152//metabolic process	gi|213385317|ref|NP_001132980.1|/0/protein-methionine sulfoxide oxidase MICAL2 [Rattus norvegicus]
ENSRNOG00000001070	Cdk2ap1	1.8235	0.840821	-	GO:0043231//intracellular membrane-bounded organelle	GO:0003676//nucleic acid binding;GO:0016772//transferase activity, transferring phosphorus-containing groups	GO:0006260//DNA replication;GO:0006464//cellular protein modification process;GO:0009653//anatomical structure morphogenesis;GO:0006796//phosphate-containing compound metabolic process;GO:0051320//S phase	gi|49355794|ref|NP_038840.2|/2.97111e-57/cyclin-dependent kinase 2-associated protein 1 [Mus musculus]
ENSRNOG00000012081	Txn1	1.75937	0.843107	K03671|1|1e-40|165|rno:116484|thioredoxin 1	GO:0031981//nuclear lumen;GO:0044444//cytoplasmic part	GO:0015036//disulfide oxidoreductase activity;GO:0016209//antioxidant activity;GO:0005488//binding	GO:0051099//positive regulation of binding;GO:0006357//regulation of transcription from RNA polymerase II promoter;GO:0055086//nucleobase-containing small molecule metabolic process;GO:0018904;GO:0006091//generation of precursor metabolites and energy;GO:0023052//signaling;GO:0007154//cell communication;GO:0019725//cellular homeostasis;GO:0000060//protein import into nucleus, translocation;GO:000…	gi|16758644|ref|NP_446252.1|/6.47702e-40/thioredoxin [Rattus norvegicus]
ENSRNOG00000016251	Dnaja2	2.75102	0.867362	K09503|1|0.0|721|rno:84026|DnaJ homolog subfamily A member 2	GO:0044424//intracellular part	GO:0043169//cation binding;GO:0005515//protein binding;GO:0032559	GO:0008283//cell proliferation;GO:0006950//response to stress;GO:0044267//cellular protein metabolic process	gi|403292522|ref|XP_003937295.1|/0/PREDICTED: dnaJ homolog subfamily A member 2 [Saimiri boliviensis boliviensis]
ENSRNOG00000003504	Rnaseh2a	2.47773	0.829679	K10743|1|4e-166|585|rno:364974|ribonuclease H2 subunit A [EC:3.1.26.4]	GO:0043234//protein complex;GO:0043231//intracellular membrane-bounded organelle	GO:0043169//cation binding;GO:0003676//nucleic acid binding;GO:0016891//endoribonuclease activity, producing 5'-phosphomonoesters	GO:0016070//RNA metabolic process	gi|61557385|ref|NP_001013252.1|/2.88062e-165/ribonuclease H2 subunit A [Rattus norvegicus]
ENSRNOG00000008320	Lypla1	2.54412	0.856272	K06128|1|1e-119|431|rno:25514|lysophospholipase I [EC:3.1.1.5]	GO:0043231//intracellular membrane-bounded organelle;GO:0044444//cytoplasmic part	GO:0004091//carboxylesterase activity;GO:0016790//thiolester hydrolase activity	GO:0032787//monocarboxylic acid metabolic process;GO:0006807//nitrogen compound metabolic process;GO:0032768;GO:0044238//primary metabolic process	gi|6981362|ref|NP_037138.1|/1.07341e-118/acyl-protein thioesterase 1 [Rattus norvegicus]
ENSRNOG00000018718	Rpp30	-2.5145	0.824529	K03539|1|1e-148|527|rno:685332|ribonuclease P/MRP protein subunit RPP1 [EC:3.1.26.5]	GO:0030681;GO:0031981//nuclear lumen	GO:0005488//binding;GO:0004549//tRNA-specific ribonuclease activity	GO:0006399//tRNA metabolic process	gi|300797494|ref|NP_001178012.1|/7.73293e-148/ribonuclease P protein subunit p30 [Rattus norvegicus]
ENSRNOG00000025602	Cdk4	2.07021	0.826993	K02089|1|5e-175|614|rno:94201|cyclin-dependent kinase 4 [EC:2.7.11.22]	GO:0031981//nuclear lumen;GO:0043234//protein complex;GO:0044444//cytoplasmic part	GO:0005515//protein binding;GO:0004674//protein serine/threonine kinase activity;GO:0032559	GO:0048511//rhythmic process;GO:0006412//translation;GO:0006796//phosphate-containing compound metabolic process;GO:0051320//S phase;GO:0048545//response to steroid hormone stimulus;GO:0023052//signaling;GO:0051318//G1 phase;GO:0008284//positive regulation of cell proliferation;GO:0008361//regulation of cell size;GO:0051726//regulation of cell cycle;GO:0010038//response to metal ion;GO:0006915//a…	gi|16758944|ref|NP_446045.1|/3.79304e-174/cyclin-dependent kinase 4 [Rattus norvegicus]
ENSRNOG00000020793	Ruvbl2	2.02593	0.812322	K11338|1|0.0|852|ecb:100051665|RuvB-like protein 2 [EC:3.6.4.12]	GO:0034399//nuclear periphery;GO:0043189//H4/H2A histone acetyltransferase complex;GO:0035097//histone methyltransferase complex	GO:0005515//protein binding;GO:0032559;GO:0003677//DNA binding;GO:0003678//DNA helicase activity	GO:0006351//transcription, DNA-dependent;GO:0006259//DNA metabolic process;GO:0009207;GO:0050789//regulation of biological process;GO:0016573//histone acetylation	gi|6755382|ref|NP_035434.1|/0/ruvB-like 2 [Mus musculus]
ENSRNOG00000042668	Msrb3	-2.7934	0.849437	K07305|1|9e-94|342|rno:688073|peptide-methionine (R)-S-oxide reductase [EC:1.8.4.12]	GO:0043231//intracellular membrane-bounded organelle	GO:0046914//transition metal ion binding;GO:0016671//oxidoreductase activity, acting on a sulfur group of donors, disulfide as acceptor	GO:0044267//cellular protein metabolic process	gi|327478524|sp|Q8BU85.2|MSRB3_MOUSE/4.91639e-93/RecName: Full=Methionine-R-sulfoxide reductase B3, mitochondrial; Short=MsrB3; Flags: Precursor
ENSRNOG00000017829	Ssu72	-2.17786	0.850184	K15544|1|6e-109|394|rno:298681|RNA polymerase II subunit A C-terminal domain phosphatase SSU72 [EC:3.1.3.16]	GO:0043231//intracellular membrane-bounded organelle	GO:0016791//phosphatase activity	GO:0006796//phosphate-containing compound metabolic process;GO:0006396//RNA processing	gi|71043762|ref|NP_001020828.1|/4.93295e-108/RNA polymerase II subunit A C-terminal domain phosphatase SSU72 [Rattus norvegicus]
ENSRNOG00000006609	Psme4	1.82389	0.830911	K06699|1|0.0|3469|rno:498433|proteasome activator subunit 4	GO:0016604//nuclear body;GO:0043234//protein complex	-	GO:0043161//proteasomal ubiquitin-dependent protein catabolic process;GO:0051320//S phase;GO:0007050//cell cycle arrest;GO:0016070//RNA metabolic process;GO:0051439//regulation of ubiquitin-protein ligase activity involved in mitotic cell cycle;GO:0006520//cellular amino acid metabolic process;GO:0006915//apoptotic process;GO:0048869//cellular developmental process;GO:0048232//male gamete generat…	gi|281427165|ref|NP_001020311.2|/0/proteasome (prosome, macropain) activator subunit 4 [Rattus norvegicus]
ENSRNOG00000014999	Tnpo1	-2.73482	0.838462	K14293|1|1e-16|89.7|cqu:CpipJ_CPIJ004613|importin subunit beta-1	GO:0043231//intracellular membrane-bounded organelle;GO:0044444//cytoplasmic part	GO:0005048//signal sequence binding;GO:0022892	GO:0006606//protein import into nucleus;GO:0051704;GO:0016070//RNA metabolic process	gi|301771930|ref|XP_002921390.1|/0/PREDICTED: transportin-1-like [Ailuropoda melanoleuca]
ENSRNOG00000047708	Gstz1	-2.72945	0.852206	K01800|1|3e-119|429|rno:681913|maleylacetoacetate isomerase [EC:5.2.1.2]	GO:0043231//intracellular membrane-bounded organelle;GO:0044444//cytoplasmic part	GO:0042802//identical protein binding;GO:0016859//cis-trans isomerase activity;GO:0004601//peroxidase activity;GO:0016765//transferase activity, transferring alkyl or aryl (other than methyl) groups	GO:0006790//sulfur compound metabolic process;GO:0006558//L-phenylalanine metabolic process;GO:0006570//tyrosine metabolic process	gi|354475007|ref|XP_003499721.1|/2.42432e-119/PREDICTED: maleylacetoacetate isomerase-like [Cricetulus griseus]
ENSRNOG00000015869	Pccb	2.55066	0.859326	K01966|1|0.0|1060|rno:24624|propionyl-CoA carboxylase beta chain [EC:6.4.1.3]	GO:0044429//mitochondrial part	GO:0016421//CoA carboxylase activity;GO:0032559	GO:0009062//fatty acid catabolic process;GO:0006520//cellular amino acid metabolic process	gi|148747119|ref|NP_058726.2|/0/propionyl-CoA carboxylase beta chain, mitochondrial precursor [Rattus norvegicus]
ENSRNOG00000014462	Fnta	2.88247	0.856598	K05955|1|0.0|640|rno:25318|protein farnesyltransferase/geranylgeranyltransferase type-1 subunit alpha [EC:2.5.1.58 2.5.1.59]	GO:0015630//microtubule cytoskeleton;GO:0043234//protein complex;GO:0044444//cytoplasmic part	GO:0046914//transition metal ion binding;GO:0008289//lipid binding;GO:0015631//tubulin binding;GO:0004661//protein geranylgeranyltransferase activity;GO:0030545	GO:0007178//transmembrane receptor protein serine/threonine kinase signaling pathway;GO:0010557//positive regulation of macromolecule biosynthetic process;GO:0010558;GO:0010033//response to organic substance;GO:0018342//protein prenylation;GO:0008283//cell proliferation;GO:0051345//positive regulation of hydrolase activity;GO:0051726//regulation of cell cycle;GO:0006915//apoptotic process;GO:0090…	gi|38492574|pdb|1O5M|A/0/Chain A, Structure Of Fpt Bound To The Inhibitor Sch66336
ENSRNOG00000010958	Prdx3	1.98233	0.851975	K03386|1|7e-146|517|rno:64371|peroxiredoxin (alkyl hydroperoxide reductase subunit C) [EC:1.11.1.15]	GO:0043234//protein complex;GO:0005768//endosome	GO:0016705//oxidoreductase activity, acting on paired donors, with incorporation or reduction of molecular oxygen;GO:0016757//transferase activity, transferring glycosyl groups;GO:0016209//antioxidant activity;GO:0004869//cysteine-type endopeptidase inhibitor activity;GO:0019900//kinase binding	GO:0030097//hemopoiesis;GO:0043549//regulation of kinase activity;GO:0042743//hydrogen peroxide metabolic process;GO:0055086//nucleobase-containing small molecule metabolic process;GO:0008283//cell proliferation;GO:0051091//positive regulation of sequence-specific DNA binding transcription factor activity;GO:0001890//placenta development;GO:0000302//response to reactive oxygen species;GO:0006996/…	gi|149040547|gb|EDL94585.1|/3.19355e-146/peroxiredoxin 3 [Rattus norvegicus]
ENSRNOG00000050473	Rps27l	-2.5519	0.860242	K02978|1|5e-38|155|ssc:100738416|small subunit ribosomal protein S27e	GO:0043231//intracellular membrane-bounded organelle;GO:0030529//ribonucleoprotein complex	GO:0090079;GO:0005198//structural molecule activity;GO:0016505//apoptotic protease activator activity;GO:0043169//cation binding	GO:0006412//translation;GO:0008630//intrinsic apoptotic signaling pathway in response to DNA damage response;GO:0006259//DNA metabolic process;GO:0051345//positive regulation of hydrolase activity;GO:0000077//DNA damage checkpoint	gi|392337774|ref|XP_003753352.1|/8.37507e-40/PREDICTED: 40S ribosomal protein S27-like [Rattus norvegicus]
ENSRNOG00000037815	Acad10	-2.85934	0.828657	K11729|1|0.0|1367|rno:304500|acyl-CoA dehydrogenase family member 10	GO:0043231//intracellular membrane-bounded organelle;GO:0043231//intracellular membrane-bounded organelle	GO:0016627//oxidoreductase activity, acting on the CH-CH group of donors;GO:0050662//coenzyme binding;GO:0016740//transferase activity;GO:0016627//oxidoreductase activity, acting on the CH-CH group of donors;GO:0050662//coenzyme binding;GO:0016740//transferase activity	GO:0008152//metabolic process;GO:0008152//metabolic process	gi|197386131|ref|NP_001128009.1|/0/acyl-CoA dehydrogenase family, member 10 [Rattus norvegicus]
ENSRNOG00000010420	Shfm1	-2.70405	0.866456	K10881|1|7e-17|87.8|acs:100552789|26 proteasome complex subunit DSS1	GO:0016591//DNA-directed RNA polymerase II, holoenzyme	GO:0005488//binding;GO:0016787//hydrolase activity	GO:0019538//protein metabolic process	gi|403306658|ref|XP_003943840.1|/5.71598e-16/PREDICTED: 26S proteasome complex subunit DSS1-like [Saimiri boliviensis boliviensis]
ENSRNOG00000009686	Aqp7	2.22886	0.838884	K08771|1|5e-156|551|rno:29171|aquaporin-7	GO:0030054//cell junction;GO:0032991//macromolecular complex;GO:0016021//integral to membrane;GO:0005903//brush border;GO:0044424//intracellular part	GO:0005372//water transmembrane transporter activity;GO:0015204//urea transmembrane transporter activity;GO:0015168//glycerol transmembrane transporter activity;GO:0022829//wide pore channel activity	GO:0042886//amide transport;GO:0003097//renal water transport;GO:0042221//response to chemical stimulus;GO:0048232//male gamete generation;GO:0008643//carbohydrate transport;GO:0044237//cellular metabolic process	gi|27734168|ref|NP_062030.2|/4.23881e-155/aquaporin-7 [Rattus norvegicus]
ENSRNOG00000005795	Aasdhppt	-2.47979	0.838905	K06133|1|5e-175|613|rno:300328|4'-phosphopantetheinyl transferase [EC:2.7.8.-]	GO:0044444//cytoplasmic part	GO:0046872//metal ion binding;GO:0016780//phosphotransferase activity, for other substituted phosphate groups	GO:0006766//vitamin metabolic process;GO:0009058//biosynthetic process;GO:0006575//cellular modified amino acid metabolic process	gi|256985146|ref|NP_001100268.2|/4.09202e-174/L-aminoadipate-semialdehyde dehydrogenase-phosphopantetheinyl transferase [Rattus norvegicus]
ENSRNOG00000016807	Oat	2.41553	0.852965	K00819|1|0.0|845|rno:64313|ornithine--oxo-acid transaminase [EC:2.6.1.13]	GO:0044429//mitochondrial part	GO:0008483//transaminase activity;GO:0048037//cofactor binding	GO:0006520//cellular amino acid metabolic process	gi|11968102|ref|NP_071966.1|/0/ornithine aminotransferase, mitochondrial precursor [Rattus norvegicus]
ENSRNOG00000009663	Apex1	-2.18513	0.849184	K10771|1|3e-168|591|rno:79116|AP endonuclease 1 [EC:4.2.99.18]	GO:0005815//microtubule organizing center;GO:0016604//nuclear body;GO:0043234//protein complex;GO:0030529//ribonucleoprotein complex	GO:0016835//carbon-oxygen lyase activity;GO:0042578//phosphoric ester hydrolase activity;GO:0016891//endoribonuclease activity, producing 5'-phosphomonoesters;GO:0003712//transcription cofactor activity;GO:0004527//exonuclease activity;GO:0043169//cation binding;GO:0003677//DNA binding;GO:0004520//endodeoxyribonuclease activity;GO:0003682//chromatin binding;GO:0019104//DNA N-glycosylase activity;…	GO:0006351//transcription, DNA-dependent;GO:0014909//smooth muscle cell migration;GO:0034614//cellular response to reactive oxygen species;GO:0019725//cellular homeostasis;GO:0006282//regulation of DNA repair;GO:0007090//regulation of S phase of mitotic cell cycle;GO:0016071//mRNA metabolic process;GO:0009725//response to hormone stimulus;GO:0032502//developmental process	gi|13162337|ref|NP_077062.1|/2.68217e-167/DNA-(apurinic or apyrimidinic site) lyase [Rattus norvegicus]
ENSRNOG00000005331	Vapb	2.46051	0.837778	K10707|1|5e-124|446|rno:60431|vesicle-associated membrane protein-associated protein B	GO:0031224//intrinsic to membrane;GO:0043231//intracellular membrane-bounded organelle;GO:0031090//organelle membrane	GO:0042802//identical protein binding;GO:0046983//protein dimerization activity;GO:0015631//tubulin binding	GO:0051704;GO:0006643//membrane lipid metabolic process;GO:0045069//regulation of viral genome replication;GO:0006984//ER-nucleus signaling pathway	gi|11177880|ref|NP_068619.1|/3.75325e-123/vesicle-associated membrane protein-associated protein B [Rattus norvegicus]
ENSRNOG00000014117	Hmox1	-3.55033	0.899242	K00510|1|2e-163|576|rno:24451|heme oxygenase [EC:1.14.99.3]	GO:0031090//organelle membrane;GO:0031981//nuclear lumen;GO:0044459//plasma membrane part;GO:0044444//cytoplasmic part;GO:0044421//extracellular region part	GO:0016705//oxidoreductase activity, acting on paired donors, with incorporation or reduction of molecular oxygen;GO:0005506//iron ion binding;GO:0060089;GO:0004620//phospholipase activity;GO:0042802//identical protein binding	GO:0033007//negative regulation of mast cell activation involved in immune response;GO:0006954//inflammatory response;GO:0042108//positive regulation of cytokine biosynthetic process;GO:0008284//positive regulation of cell proliferation;GO:0007584//response to nutrient;GO:0050673//epithelial cell proliferation;GO:0048872//homeostasis of number of cells;GO:0045765//regulation of angiogenesis;GO:00…	gi|6981032|ref|NP_036712.1|/1.60061e-162/heme oxygenase 1 [Rattus norvegicus]
ENSRNOG00000007111	Nrd1	2.48862	0.852249	K01411|1|0.0|2189|aml:100480818|nardilysin [EC:3.4.24.61]	GO:0044444//cytoplasmic part;GO:0043231//intracellular membrane-bounded organelle;GO:0044444//cytoplasmic part	GO:0046914//transition metal ion binding;GO:0019838//growth factor binding;GO:0016787//hydrolase activity;GO:0004175//endopeptidase activity;GO:0046914//transition metal ion binding;GO:0019838//growth factor binding	GO:0048741//skeletal muscle fiber development;GO:0048870//cell motility;GO:0019538//protein metabolic process;GO:0031331;GO:0052547//regulation of peptidase activity;GO:0048741//skeletal muscle fiber development;GO:0048870//cell motility;GO:0019538//protein metabolic process;GO:0031331;GO:0052547//regulation of peptidase activity	gi|149035699|gb|EDL90380.1|/0/nardilysin, N-arginine dibasic convertase 1 [Rattus norvegicus]
ENSRNOG00000008933	Plbd1	-2.46056	0.84832	-	-	GO:0003824//catalytic activity	GO:0006629//lipid metabolic process	gi|62078583|ref|NP_001013949.1|/0/phospholipase B-like 1 precursor [Rattus norvegicus]
ENSRNOG00000009675	Cdc42bpb	-2.52861	0.805529	K08286|1|0.0|3248|rno:113960|protein-serine/threonine kinase [EC:2.7.11.-]	GO:0030054//cell junction;GO:0043232	GO:0030695//GTPase regulator activity;GO:0004672//protein kinase activity;GO:0017016//Ras GTPase binding;GO:0046872//metal ion binding;GO:0032559	GO:0019222//regulation of metabolic process;GO:0006796//phosphate-containing compound metabolic process;GO:0030036//actin cytoskeleton organization;GO:0007165//signal transduction;GO:0006464//cellular protein modification process	gi|76257394|ref|NP_446072.2|/0/serine/threonine-protein kinase MRCK beta [Rattus norvegicus]
ENSRNOG00000002928	Guk1	2.42614	0.855039	K00942|1|7e-120|430|rno:303179|guanylate kinase [EC:2.7.4.8]	GO:0044444//cytoplasmic part	GO:0016776//phosphotransferase activity, phosphate group as acceptor;GO:0032559	GO:0009117//nucleotide metabolic process	gi|226874873|ref|NP_001013133.2|/5.4099e-119/guanylate kinase [Rattus norvegicus]
ENSRNOG00000016031	Bicd2	2.25508	0.849057	K11498|1|4e-19|98.6|mdo:100013897|centromeric protein E;K10421|5|4e-17|92.0|tgu:100219895|CAP-Gly domain-containing linker protein 1	GO:0031982//vesicle;GO:0043232;GO:0043231//intracellular membrane-bounded organelle;GO:0016020//membrane	GO:0005083//small GTPase regulator activity;GO:0005488//binding	GO:0019222//regulation of metabolic process;GO:0034453//microtubule anchoring;GO:0072384//organelle transport along microtubule	gi|76008363|ref|NP_001028846.1|/0/bicaudal D homolog 2 isoform 1 [Rattus norvegicus]
ENSRNOG00000003917	Uck2	2.12946	0.83861	K00876|1|7e-117|421|rno:304944|uridine kinase [EC:2.7.1.48]	GO:0044444//cytoplasmic part	GO:0019206//nucleoside kinase activity;GO:0032559	GO:0006796//phosphate-containing compound metabolic process;GO:0009611//response to wounding;GO:0009174;GO:0070482//response to oxygen levels;GO:0009112;GO:0007610//behavior;GO:0070646//protein modification by small protein removal;GO:0008655//pyrimidine-containing compound salvage	gi|156151450|ref|NP_001095878.1|/5.32064e-116/uridine-cytidine kinase 2 [Rattus norvegicus]
ENSRNOG00000001442	Por	-2.55862	0.852744	K00327|1|0.0|1343|rno:29441|NADPH-ferrihemoprotein reductase [EC:1.6.2.4]	GO:0043231//intracellular membrane-bounded organelle;GO:0031090//organelle membrane	GO:0046914//transition metal ion binding;GO:0005515//protein binding;GO:0000166//nucleotide binding;GO:0016675;GO:0050662//coenzyme binding;GO:0016653//oxidoreductase activity, acting on NADH or NADPH, heme protein as acceptor	GO:0010893//positive regulation of steroid biosynthetic process;GO:0002062//chondrocyte differentiation;GO:0032768;GO:0008203//cholesterol metabolic process;GO:0009698//phenylpropanoid metabolic process;GO:0006475//internal protein amino acid acetylation;GO:0006730//one-carbon metabolic process;GO:0006631//fatty acid metabolic process;GO:0006520//cellular amino acid metabolic process;GO:0006915//…	gi|13928780|ref|NP_113764.1|/0/NADPH--cytochrome P450 reductase [Rattus norvegicus]
ENSRNOG00000014234	Hif1an	2.30205	0.815071	K00476|1|0.0|686|rno:309434|aspartate beta-hydroxylase [EC:1.14.11.16]	GO:0043231//intracellular membrane-bounded organelle	GO:0016706//oxidoreductase activity, acting on paired donors, with incorporation or reduction of molecular oxygen, 2-oxoglutarate as one donor, and incorporation of one atom each of oxygen into both donors;GO:0043169//cation binding;GO:0016701//oxidoreductase activity, acting on single donors with incorporation of molecular oxygen	GO:0008152//metabolic process	gi|198278531|ref|NP_001107221.1|/0/hypoxia-inducible factor 1-alpha inhibitor [Rattus norvegicus]
ENSRNOG00000039567	Trmt10c	-2.24827	0.82653	K15445|1|8e-20|100|api:100160361|tRNA (guanine9-N1)-methyltransferase [EC:2.1.1.221]	GO:0043231//intracellular membrane-bounded organelle	GO:0016741	GO:0006399//tRNA metabolic process;GO:0006730//one-carbon metabolic process	gi|56605752|ref|NP_001008338.1|/0/mitochondrial ribonuclease P protein 1 precursor [Rattus norvegicus]
ENSRNOG00000018564	Nup93	2.27801	0.80633	K14309|1|0.0|1539|rno:291874|nuclear pore complex protein Nup93	GO:0005635//nuclear envelope	GO:0005488//binding	GO:0050658//RNA transport;GO:0015758//glucose transport;GO:0044238//primary metabolic process	gi|58865420|ref|NP_001011925.1|/0/nuclear pore complex protein Nup93 [Rattus norvegicus]
ENSRNOG00000019214	Rbx1	1.94227	0.845908	K03868|1|3e-64|243|aml:100469702|RING-box protein 1	GO:0080008//Cul4-RING ubiquitin ligase complex;GO:0000153//cytoplasmic ubiquitin ligase complex;GO:0000152//nuclear ubiquitin ligase complex	GO:0046914//transition metal ion binding;GO:0019787//small conjugating protein ligase activity;GO:0031369//translation initiation factor binding	GO:0043161//proteasomal ubiquitin-dependent protein catabolic process;GO:0006259//DNA metabolic process;GO:0032446//protein modification by small protein conjugation;GO:0051704;GO:0033554//cellular response to stress	gi|32425477|gb|AAH17370.2|/1.87146e-63/RBX1 protein [Homo sapiens]
ENSRNOG00000042044	Stard3	2.79482	0.832628	-	GO:0005770//late endosome;GO:0031224//intrinsic to membrane	GO:0032934//sterol binding;GO:0015248//sterol transporter activity	GO:0046907//intracellular transport;GO:0015918//sterol transport;GO:0016125//sterol metabolic process	gi|62079193|ref|NP_001014251.1|/0/stAR-related lipid transfer protein 3 [Rattus norvegicus]
